# Supplementary material for: Global loss of cellular m6A RNA methylation following infection with different SARS-CoV-2 variants
Source: bioRxiv preprint, doi:10.1101/2022.12.08.519593, version 1 (2022-12-09)
Supplement: Supplemental Data S1 [file 519593_file04.xlsx]

## Sheet: B.1_vs_NonInfectedVero
gene	log2FoldChange	pvalue	padj	lfcSE	baseMean
LOC103235563	8.67392	3.04822e-09	2.83755e-08	2.46978	19.2682
MRC1	8.31833	1.07634e-08	9.32996e-08	2.44298	23.7077
ARC	7.84786	5.13045e-09	4.65025e-08	1.25937	49.4041
LOC103228822	7.77736	8.9085e-08	6.92361e-07	2.417	14.7874
LSMEM1	7.54837	1.89611e-08	1.59294e-07	1.26496	28.5473
LOC103227078	7.23141	8.87569e-07	5.99503e-06	2.43437	7.11722
LOC103233728	7.00203	1.38201e-06	9.08602e-06	2.39042	9.75934
LOC103233729	6.85002	2.67633e-06	1.69783e-05	2.40257	7.31821
LOC103225418	6.70476	3.32455e-06	2.07517e-05	2.36841	10.234
LOC103248215	6.49914	8.741e-06	5.1005e-05	2.40353	5.84362
SPINK4	6.36106	1.50522e-05	8.42773e-05	2.42263	5.38737
MYRFL	6.34832	9.63529e-06	5.57601e-05	2.35587	9.5372
LOC103214892	6.23897	3.7933e-10	3.86612e-09	0.964927	65.5277
NAALAD2	6.18357	3.71425e-24	1.01401e-22	0.605639	51.8813
NR4A3	6.07207	1.4819e-26	4.58736e-25	0.56711	50.7205
LOC103243087	6.05019	1.73769e-09	1.66512e-08	0.980586	28.2128
LY6G6D	6.04817	6.32798e-05	0.000312447	2.51231	3.2848
BHLHE41	6.00883	2.32011e-09	2.18651e-08	0.976997	29.0101
RGCC	6.0043	5.17563e-06	3.13525e-05	1.27156	28.6728
SLC9C2	5.94527	3.60294e-05	0.000187636	2.38014	6.42137
NOG	5.93835	3.15246e-05	0.000166262	2.35678	8.2925
NR2E1	5.86121	6.04523e-05	0.000299783	2.42667	5.10199
LOC103221999	5.85832	6.35646e-05	0.000313599	2.43485	3.96921
SLCO5A1	5.7424	8.70045e-12	1.04268e-10	0.832335	33.2632
NFKBID	5.70659	6.02903e-17	1.06907e-15	0.683554	30.6503
IRF8	5.69651	1.62406e-05	9.03496e-05	1.29816	12.1302
NEURL3	5.66416	2.5174e-27	8.10895e-26	0.523984	37.692
TRIM10	5.64619	6.89939e-05	0.00033792	2.35929	6.1773
C12H9orf173	5.64325	8.2345e-05	0.000396297	2.3875	7.4578
LOC103230848	5.59453	0.000105878	0.000496473	2.41419	4.85776
TNFAIP3	5.53986	0	0	0.133766	1083.76
LOC103240825	5.53437	0.000148068	0.000672675	2.45339	3.93158
LOC103244310	5.51213	0.000171341	0.000767935	2.4749	3.3965
LOC103243101	5.48927	2.47705e-13	3.40669e-12	0.747881	47.145
LOC103232975	5.44685	0.00020397	0.000897097	2.47755	4.28173
CCDC168	5.41788	9.55445e-69	1.21182e-66	0.309419	129.504
LINGO3	5.40767	3.70969e-05	0.000192701	1.29994	14.1994
RASSF10	5.35689	0.00011098	0.000518264	2.31879	11.5256
SNX31	5.34312	0.00011106	0.000518506	2.31076	11.838
PER1	5.32084	0	0	0.136049	566.928
LOC103214890	5.30162	0.000170659	0.000765451	2.38363	5.30423
FGF9	5.25453	0.000270644	0.00115519	2.4729	3.75689
LOC103222329	5.25214	0.000255664	0.00109792	2.45532	3.72726
GUCY2C	5.22155	3.0115e-07	2.18957e-06	1.02307	14.7688
LOC103246057	5.22144	2.59032e-07	1.90228e-06	1.01686	13.5828
RAD51AP2	5.19832	0.000405703	0.00166512	2.56093	3.53592
RASGEF1B	5.18875	7.08997e-05	0.000346326	1.31124	11.7043
LOC103236025	5.08437	5.24006e-07	3.65843e-06	1.02029	14.5059
LOC103237953	5.05718	1.71698e-11	1.99866e-10	0.757006	24.1297
LOC103230215	5.03951	0.000162911	0.000732677	1.39967	6.01066
LOC103223616	5.03568	0.000684621	0.00267292	2.64584	2.50143
ALOXE3	4.98005	1.77595e-43	1.03629e-41	0.360919	137.735
CMYA5	4.96967	8.03108e-20	1.69572e-18	0.548015	52.8578
LOC103237006	4.95602	0.000227974	0.000990891	2.28138	26.2954
LOC103238938	4.94227	6.76758e-06	4.02616e-05	1.16549	5.07904
TMEM119	4.93714	0.000333947	0.00139698	2.37654	6.11064
LOC103240218	4.93513	0.000324461	0.00136073	2.36615	7.36115
STYK1	4.91904	0.000373031	0.00154316	2.39738	5.03205
EREG	4.91011	1.29601e-06	8.56378e-06	1.02875	13.9012
LOC103218856	4.86015	0.000465314	0.00188311	2.42684	4.40476
LOC103221344	4.80121	4.35285e-06	2.67049e-05	1.08687	6.40106
LOC103236393	4.79571	0.000669841	0.00262419	2.51736	3.19744
HSPA1B	4.74803	5.24667e-80	8.48011e-78	0.251221	160.281
CDC20B	4.7455	8.8623e-08	6.89064e-07	0.914767	9.92892
DKK1	4.74492	0.000285139	0.00120942	1.37763	6.3235
DAPP1	4.73641	0.000775553	0.00298896	2.53278	3.04658
LOC103245434	4.73586	0.000778571	0.00299807	2.53401	2.93823
LOC103238753	4.67223	0.000890286	0.00338472	2.54393	3.09505
IP6K3	4.64456	3.01331e-139	1.48743e-136	0.185311	220.16
ZNF469	4.6373	1.97467e-13	2.73845e-12	0.640254	50.4098
BACH2	4.6243	3.20434e-47	2.13592e-45	0.322048	84.9665
LOC103222275	4.60365	0.000426159	0.00174086	1.4041	6.10529
RND1	4.60065	2.94515e-16	4.93035e-15	0.570532	31.1319
LOC103215366	4.58815	0.00121364	0.00445727	2.64317	2.56819
SIX4	4.57231	1.00157e-27	3.26654e-26	0.422162	55.2196
HES7	4.55159	2.74676e-30	9.91438e-29	0.401476	62.7202
LOC103246720	4.52694	0.000483313	0.00195034	1.39535	6.5361
ACHE	4.51406	4.66246e-15	7.22267e-14	0.588965	35.8506
FAM46B	4.5138	1.81043e-27	5.87313e-26	0.419866	48.2137
HSPA1L	4.47238	2.08806e-41	1.16625e-39	0.333556	103.597
LOC103224727	4.44145	0.000433788	0.00176925	1.31977	31.9666
LOC103221684	4.42759	0.000512868	0.00205552	1.3537	11.9931
CNN1	4.4131	7.27499e-07	4.97829e-06	0.933277	12.1926
MUC22	4.40641	0.000839105	0.00320615	2.39362	7.05623
EVPL	4.40249	1.10951e-55	9.38155e-54	0.28141	128.459
ENAM	4.36984	0.000944871	0.00356184	2.41864	6.65029
LOC103241076	4.34879	1.66408e-09	1.59793e-08	0.747459	11.8932
LOC103239253	4.31834	0.00111462	0.00412344	2.45188	4.65691
LOC103248169	4.30808	0.00253576	0.00847141	3.01118	1.92276
WNK2	4.2941	0.00127742	0.00466145	2.50639	3.75326
LOC103236414	4.27931	4.7614e-19	9.60908e-18	0.486125	70.077
HSPH1	4.27144	0	0	0.111173	862.707
NR1D1	4.26605	3.19197e-194	5.29982e-191	0.143846	259.542
LOC103229306	4.26518	0.00130431	0.00474731	2.49013	4.10344
LOC103226752	4.2491	1.04015e-06	6.95617e-06	0.912401	12.4422
PRDM1	4.24727	4.53223e-05	0.000230383	1.12755	9.79969
LOC103227183	4.23825	0.00142004	0.00510444	2.515	3.7344
PNLDC1	4.23355	1.84269e-11	2.13682e-10	0.649587	17.4308
PDE4B	4.22663	6.07057e-05	0.000300876	1.14558	5.70299
C17H6orf25	4.22175	4.46157e-05	0.000227298	1.1122	8.12123
IFRD1	4.22013	1.58216e-116	4.98216e-114	0.184343	200.061
LOC103222465	4.20859	7.52872e-10	7.45282e-09	0.701516	56.4532
GADD45B	4.19001	2.23226e-192	3.3975e-189	0.141826	330.839
RTP2	4.18914	0.00104267	0.00388878	1.42828	5.71382
LOC103246766	4.18887	1.16088e-08	1.00011e-07	0.766639	10.1443
FER1L6	4.18788	0.000913966	0.00346178	1.38578	8.41928
DUSP8	4.18665	1.81546e-114	5.348e-112	0.184594	302.228
GAST	4.17934	0.000994605	0.00372625	1.40329	7.67423
LOC103245068	4.17427	0.00179842	0.00628037	2.63196	3.42333
ADAM30	4.17119	0.00167961	0.0059221	2.56168	3.27935
WFDC12	4.17097	0.00293812	0.00965487	3.05617	2.1796
LOC103223596	4.1529	0.00102441	0.00382848	1.39758	8.1736
LOC103243446	4.14177	4.59748e-05	0.00023331	1.08839	9.08539
THBS2	4.13451	2.97422e-110	7.87264e-108	0.185867	198.948
SCRT1	4.09127	1.06519e-15	1.71709e-14	0.519993	50.9297
PMAIP1	4.08921	1.33614e-102	3.29775e-100	0.190745	184.454
IER5	4.08486	5.95937e-115	1.78429e-112	0.179853	230.458
FAM71A	4.08459	2.58413e-32	1.01936e-30	0.348746	84.9766
OASL	4.06942	0.000134755	0.000618072	1.20111	4.18754
GCH1	4.06882	2.87029e-15	4.50546e-14	0.527451	27.3886
ETS2	4.06542	2.41666e-74	3.36931e-72	0.224019	149.729
LOC103222016	4.05746	1.95477e-07	1.4614e-06	0.823583	15.7059
HSPA1A	4.05321	2.40003e-57	2.1176e-55	0.255557	108.953
SCG2	4.04817	0.00170541	0.00599558	1.53641	3.4918
LOC103219642	3.97545	0.000124964	0.00057737	1.152	5.5985
MATN4	3.95826	0.000134886	0.000618519	1.15513	5.44211
DNAJB1	3.95463	2.97183e-290	1.35694e-286	0.10881	739.54
LY6G6C	3.94414	0.000210936	0.000923206	1.21062	4.3475
FAM166A	3.93585	1.8871e-08	1.5861e-07	0.730241	25.5177
LOC103227170	3.93449	5.83083e-06	3.51003e-05	0.927508	12.288
LOC103238265	3.91352	0.00295228	0.00969791	2.81911	2.25446
ADAM32	3.91105	8.11583e-06	4.76156e-05	0.942318	10.8623
GEM	3.90936	1.10899e-122	4.05094e-120	0.166455	239.625
ISG15	3.90701	5.25345e-12	6.42229e-11	0.587155	16.5888
LOC103244502	3.90489	1.49248e-13	2.08559e-12	0.543969	25.7473
COLEC11	3.891	1.40289e-05	7.89107e-05	0.980934	6.64643
SOCS2	3.88998	3.72471e-07	2.65838e-06	0.805512	24.7424
LOC103235340	3.88213	0.0018869	0.00655674	1.45168	5.66978
MMP25	3.86506	8.98143e-05	0.000428518	1.06598	24.9506
ANKRD30A	3.83536	0.000143001	0.000652128	1.11214	9.31944
CHST11	3.82377	2.33027e-20	5.12154e-19	0.422189	38.6653
ASIP	3.82006	7.30819e-06	4.32804e-05	0.908411	26.9872
KIF17	3.81528	8.266e-10	8.14734e-09	0.650337	24.096
ATF3	3.81052	8.57781e-156	5.40225e-153	0.143635	327.395
GOLGA6B	3.77402	1.97056e-12	2.4838e-11	0.553155	25.6641
LOC103241687	3.77265	4.25361e-07	3.01349e-06	0.813464	6.72275
MROH8	3.76228	2.09946e-07	1.56508e-06	0.784894	7.2503
SOX2	3.76227	3.279e-06	2.05024e-05	0.877815	7.60251
WNT7B	3.75581	1.90683e-07	1.42614e-06	0.765007	12.8442
IL18RAP	3.75085	3.00234e-05	0.000159172	0.999344	8.00304
LOC103232626	3.73944	2.53433e-07	1.86416e-06	0.775417	11.4355
LOC103220473	3.73942	2.12386e-08	1.77286e-07	0.702571	18.4979
C6H19orf35	3.72727	3.08244e-13	4.19193e-12	0.527275	26.417
LOC103225539	3.72179	2.29753e-13	3.17414e-12	0.525527	18.5758
GAS2L3	3.71802	2.77541e-40	1.47785e-38	0.283285	73.7885
LOC103226886	3.69384	3.15224e-12	3.92987e-11	0.551956	17.8669
NR4A1	3.6917	1.12698e-67	1.38142e-65	0.213617	109.768
UPP1	3.68436	1.23138e-59	1.13014e-57	0.227789	88.773
FHDC1	3.68376	2.74321e-07	2.0081e-06	0.764231	15.3924
LOC103219960	3.68259	1.65753e-06	1.07926e-05	0.821666	20.0881
LOC103246776	3.68229	1.92155e-05	0.000105359	0.939001	15.7026
LOC103237004	3.67515	1.99155e-49	1.40439e-47	0.250435	117.918
HBEGF	3.66096	1.66248e-86	3.0063e-84	0.186699	232.756
PHEX	3.65653	0.000295581	0.00124878	1.14446	8.34839
GRASP	3.65093	5.24181e-12	6.41236e-11	0.549804	24.2515
TMEM151B	3.6345	1.78233e-09	1.70343e-08	0.630199	57.6331
LOC103236357	3.63114	4.18157e-05	0.00021477	0.984309	8.10236
GPCPD1	3.61624	7.26559e-17	1.27964e-15	0.446	30.0517
MYCL	3.60813	3.27161e-22	7.97766e-21	0.379191	52.0164
LOC103236320	3.59744	0.000491201	0.00197693	1.20469	4.8615
LOC103215046	3.58693	0.00269635	0.00894247	2.52494	9.19941
LOC103235257	3.55926	0.000489752	0.00197196	1.19122	7.13174
LOC103221945	3.54702	2.70531e-25	7.81799e-24	0.347911	32.5837
LOC103222008	3.54192	0.000650628	0.00255715	1.26143	4.67587
CSRNP1	3.53906	3.88756e-167	3.22738e-164	0.128792	386.726
NFKBIA	3.53663	3.13581e-174	3.01434e-171	0.125888	319.344
DDIT3	3.51447	9.07474e-119	3.06928e-116	0.152345	227.093
MUC17	3.50857	4.26617e-07	3.02122e-06	0.737714	66.1481
LOC103220375	3.5004	1.51544e-05	8.4816e-05	0.898382	7.46523
LOC103231510	3.49546	2.31552e-11	2.65479e-10	0.545268	23.1697
GPR142	3.44212	0.00055541	0.00221147	1.15853	10.3778
TRAF1	3.43514	2.22253e-18	4.30459e-17	0.402762	28.9825
TNNT2	3.42979	1.76784e-05	9.74874e-05	0.88838	10.2975
LOC103216147	3.42343	7.02313e-06	4.17004e-05	0.851577	6.70327
PIM3	3.40546	1.41425e-142	7.37998e-140	0.134351	284.524
NFIL3	3.40104	1.01826e-98	2.32469e-96	0.161906	205.267
CREB5	3.40034	2.03155e-215	4.63803e-212	0.10878	573.559
LOC103215795	3.3984	1.6256e-06	1.05922e-05	0.765377	22.6955
KLF4	3.39561	1.81667e-17	3.32129e-16	0.409025	35.3263
ANKRD1	3.391	6.42432e-27	2.03e-25	0.320004	165.828
IRF1	3.38793	5.53285e-135	2.46468e-132	0.137475	224.47
ZBTB17	3.36685	5.81646e-122	2.08298e-119	0.14386	238.523
MAFA	3.36656	1.49793e-30	5.50468e-29	0.297203	64.6025
LOC103240261	3.36598	1.636e-09	1.57263e-08	0.591306	16.2692
LOC103240046	3.36554	4.81687e-06	2.93056e-05	0.810069	9.34553
NACAD	3.34587	4.82867e-07	3.39003e-06	0.715563	18.7707
IL11	3.33428	1.04719e-152	6.37529e-150	0.12692	487.123
CFP	3.33091	0.000917966	0.00347332	1.21133	6.18366
CCNB1IP1	3.32395	1.58388e-21	3.6945e-20	0.357143	44.8827
FAM179A	3.31901	1.60112e-07	1.20739e-06	0.679037	18.6256
ZFAND2A	3.28847	1.52807e-32	6.08031e-31	0.280539	83.9056
ACTRT3	3.28798	0.000178793	0.000797039	1.01889	8.42411
HSPA6	3.27514	7.59837e-32	2.90328e-30	0.28286	66.0374
PER2	3.26606	9.89999e-111	2.65902e-108	0.146562	256.013
FAM171B	3.22993	7.75001e-24	2.07242e-22	0.326929	55.5377
CKB	3.21525	0.000805937	0.00308976	1.22654	3.40952
BDKRB1	3.20376	0.000491062	0.0019768	1.11395	5.48437
USPL1	3.19614	1.86766e-67	2.215e-65	0.185497	139.545
WDR49	3.19457	2.91408e-05	0.000154537	0.872434	7.04142
LOC103237735	3.18532	1.58224e-09	1.52496e-08	0.557942	22.4456
ACTA1	3.16907	6.52396e-15	1.00129e-13	0.42113	27.2432
DUSP5	3.1614	1.18416e-60	1.13829e-58	0.193506	169.468
CD300A	3.15955	2.16002e-06	1.38423e-05	0.729441	22.8483
LOC103224014	3.15576	4.92468e-05	0.000248465	0.877743	14.685
PLEKHA4	3.14584	1.52528e-112	4.2858e-110	0.140196	300.921
CLDN19	3.14493	0.00028049	0.00119155	1.01755	8.78662
TNFRSF10B	3.14386	7.61475e-158	5.56303e-155	0.117828	366.017
LOC103233464	3.13679	4.88415e-07	3.42434e-06	0.673075	36.3313
SERPINE1	3.13534	6.50419e-231	1.69704e-227	0.0968752	1419.13
ZC3H12A	3.13238	4.96093e-65	5.42553e-63	0.185238	164.96
DLGAP3	3.12784	6.86374e-05	0.000336445	0.898406	10.791
LOC103215980	3.12577	2.58986e-13	3.55114e-12	0.446734	16.1015
HEY1	3.12419	0.00051779	0.00207111	1.09564	5.60765
LOC103221995	3.11759	6.39751e-21	1.44609e-19	0.340515	44.2628
ADCY10	3.11413	3.89303e-16	6.44627e-15	0.3949	39.1929
HIVEP2	3.11243	3.17109e-189	3.86112e-186	0.106344	510.224
HMOX1	3.11218	1.60164e-78	2.47901e-76	0.16682	165.541
GLI1	3.10764	2.02048e-05	0.000110254	0.822415	15.0746
RTN4R	3.09727	0.000590886	0.00234149	1.1112	5.09655
WEE1	3.09681	3.89618e-62	3.88852e-60	0.187536	157.219
ZSWIM6	3.09168	6.96846e-86	1.23565e-83	0.158216	263.209
ZNF367	3.08484	3.60653e-35	1.59106e-33	0.25241	93.2815
KLF10	3.08107	6.90347e-129	2.68266e-126	0.127997	264.517
ABCA4	3.07958	1.27889e-11	1.50986e-10	0.477094	20.9985
TIPARP	3.0749	8.57306e-75	1.20445e-72	0.169266	156.025
STX11	3.07265	0.0002409	0.0010431	1.0044	5.53653
EPHA2	3.07076	1.43576e-247	4.37045e-244	0.0915932	778.034
ABCB4	3.06566	3.6464e-16	6.05436e-15	0.387314	52.1813
STARD13	3.06531	5.09451e-119	1.75559e-116	0.132654	298.866
LOC103235307	3.06477	2.11035e-14	3.11084e-13	0.414757	44.8688
AEN	3.0507	3.72708e-113	1.0805e-110	0.135491	319.763
BEST4	3.04617	0.0002173	0.000948107	0.997488	5.12346
LOC103241812	3.04305	2.7389e-28	9.14503e-27	0.279972	124.224
LOC103243832	3.04229	4.73888e-16	7.79036e-15	0.386456	33.8595
NRARP	3.04111	1.82204e-08	1.53226e-07	0.577421	19.1739
DHRS2	3.03527	2.04254e-15	3.24391e-14	0.394831	39.1106
NFKBIE	3.03435	3.06361e-40	1.62185e-38	0.231454	86.145
ATP1A4	3.03383	0.000393923	0.00162004	1.04715	5.44572
LOC103235532	3.03263	2.25734e-11	2.59296e-10	0.475782	24.4367
MFSD2A	3.02924	2.57473e-15	4.06438e-14	0.395279	49.8935
HIVEP1	3.02798	8.56271e-190	1.20299e-186	0.103257	635.579
CEP85L	3.02566	1.47736e-53	1.17828e-51	0.197878	163.32
INSIG1	3.02423	3.76129e-54	3.03965e-52	0.196785	125.68
DNAJA4	3.01506	1.29978e-37	6.34737e-36	0.238082	130.684
DUSP1	3.01323	7.04931e-177	7.15269e-174	0.106568	462.014
ANGPT2	3.01003	4.93216e-06	2.99471e-05	0.73481	9.95594
SMCO2	2.98317	8.0316e-05	0.000387247	0.879779	7.17751
LOC103222007	2.98301	1.38773e-34	6.02033e-33	0.246653	58.7512
NDUFAF5	2.97526	2.27759e-12	2.86093e-11	0.443365	18.6966
FAM65B	2.9713	0.000141079	0.000644165	0.907868	12.4828
HSP90AA1	2.96899	1.25028e-201	2.53723e-198	0.0982782	690.392
HRH1	2.9612	3.10743e-05	0.000164124	0.815189	8.62846
IL12A	2.95897	0.000195196	0.000863211	0.935176	8.20623
MPP4	2.95549	7.70838e-05	0.000372745	0.868569	8.52383
UTP15	2.95003	7.72118e-36	3.53433e-34	0.239138	91.9701
ADRB1	2.94988	0.000582409	0.00231091	1.0348	12.5013
TMC7	2.94588	8.1208e-20	1.71268e-18	0.331329	54.3144
ULBP3	2.94419	0.000208532	0.000915097	0.946157	8.79209
LOC103240604	2.94014	0.000251625	0.0010844	0.959374	6.52228
LOC103241404	2.93766	1.40501e-08	1.19912e-07	0.553974	11.4996
LOC103228087	2.92838	0.000680705	0.00266161	1.05938	7.77411
LOC103236463	2.92736	0.000195868	0.000865764	0.927043	11.3269
CCNL1	2.9241	2.60862e-169	2.26875e-166	0.105731	383.272
LOC103241820	2.92016	2.81306e-41	1.5569e-39	0.219354	107.306
PPARG	2.91153	1.29798e-93	2.72486e-91	0.142566	221.635
TSC22D2	2.90857	4.61262e-188	5.26531e-185	0.0997262	643.667
TAF4B	2.90834	6.37826e-45	3.88309e-43	0.209123	129.091
JUN	2.90621	6.50364e-172	5.93912e-169	0.104344	1329.91
ATP8B1	2.9028	9.36067e-33	3.74919e-31	0.247195	93.5135
NFKB2	2.90201	2.49316e-189	3.25251e-186	0.0991325	506.651
GP1BA	2.90197	2.26472e-07	1.67937e-06	0.609945	13.6811
MYH15	2.89833	0.0025117	0.00840331	1.24508	9.06063
FNDC7	2.89817	0.000899408	0.00341513	1.08926	5.95447
CCRN4L	2.89659	3.96493e-43	2.2844e-41	0.212654	130.74
LOC103221953	2.89613	0.00220144	0.00749293	1.20494	12.591
LOC103221937	2.88746	1.07151e-12	1.39091e-11	0.423144	20.5753
ADRB2	2.88508	3.90364e-05	0.000201686	0.811736	6.29517
CETP	2.88446	0.000801462	0.00307519	1.10441	4.11785
LOC103222274	2.88296	6.83632e-13	9.02158e-12	0.418008	26.4648
OVGP1	2.87849	0.000888521	0.00337941	1.07125	7.90865
SLC25A25	2.87272	2.72398e-34	1.16512e-32	0.23839	134.513
TPX2	2.86703	2.14458e-102	5.22249e-100	0.134118	197.959
DACT1	2.86687	2.45415e-11	2.80667e-10	0.449485	51.1404
DSE	2.86336	1.37301e-16	2.35904e-15	0.357446	43.4171
LOC103220839	2.85995	0.00209849	0.00718268	1.25993	3.44683
PLAUR	2.859	9.90591e-36	4.4672e-34	0.232188	66.587
NEDD9	2.85614	1.46714e-18	2.88127e-17	0.334565	40.1404
DNAJB5	2.85504	3.47493e-44	2.07406e-42	0.207149	95.6549
LOC103215289	2.85499	3.18054e-06	1.99141e-05	0.677466	16.2559
LOC103214704	2.8503	0.00198906	0.00685308	1.2477	3.47911
LOC103248202	2.84654	8.83639e-05	0.000422039	0.840915	11.4998
NR4A2	2.84394	1.92791e-09	1.83297e-08	0.503437	15.5461
LOC103222024	2.83479	4.82761e-24	1.31013e-22	0.286086	49.9888
LOC103221944	2.83448	8.51691e-65	9.20431e-63	0.168013	116.214
BAG3	2.82375	2.21788e-143	1.19139e-140	0.111217	489.246
IGSF9	2.82297	7.17676e-12	8.66334e-11	0.431101	33.2574
UBE2S	2.8223	5.09511e-81	8.38353e-79	0.14902	169.931
FOSL1	2.82113	1.80215e-68	2.25442e-66	0.162481	211.758
ARRDC4	2.80534	4.91278e-15	7.5783e-14	0.370003	72.3019
LOC103237450	2.80503	2.2717e-41	1.26495e-39	0.210873	94.788
LOC103229704	2.80197	0.000765034	0.00295127	1.04907	4.65132
FZD8	2.79639	2.73555e-20	5.97633e-19	0.310881	83.9891
PPP1R15B	2.79544	9.33162e-166	7.41012e-163	0.102116	476.503
LOC103223784	2.79476	3.60617e-12	4.47439e-11	0.420595	22.941
SPDYA	2.79432	0.00184573	0.00642716	1.21231	4.37339
CRY1	2.79398	8.859e-30	3.12357e-28	0.251052	86.0739
LOC103222020	2.79213	2.85375e-142	1.4478e-139	0.110397	387.464
NFATC2	2.78521	2.05474e-06	1.32047e-05	0.647012	17.0098
LEPR	2.78495	3.38642e-28	1.12454e-26	0.257462	65.4072
SOCS1	2.78191	2.97221e-07	2.16359e-06	0.589506	20.3294
LOC103233496	2.77706	3.08093e-16	5.14823e-15	0.350841	43.4436
FGF18	2.7739	2.98954e-06	1.8802e-05	0.65834	13.8907
LOC103243192	2.77019	0.000536716	0.00214217	0.982849	7.34705
LOC103224833	2.76973	0.00212865	0.00726823	1.21716	3.58673
LOC103244631	2.76118	4.75422e-06	2.8963e-05	0.674863	11.6243
KLF5	2.74837	4.51536e-59	4.10291e-57	0.17097	151.33
FAM46C	2.74758	7.78673e-07	5.30264e-06	0.608549	24.8388
LOC103221947	2.7472	6.95925e-22	1.65747e-20	0.292565	44.8378
DBF4	2.74612	2.8705e-28	9.56695e-27	0.253339	71.5902
REL	2.74068	3.12676e-16	5.22003e-15	0.346018	45.2738
TFAP2C	2.73415	1.02267e-10	1.11113e-09	0.445679	26.5462
ACER2	2.73341	4.75877e-08	3.81705e-07	0.539696	20.3266
APOLD1	2.72268	0.00069472	0.0027083	0.997806	6.14538
ARRDC3	2.72253	4.50021e-63	4.59172e-61	0.163672	136.688
DUSP10	2.72227	1.011e-40	5.51193e-39	0.206057	89.6546
HLX	2.72006	4.14702e-23	1.05784e-21	0.280641	56.4195
TMEM40	2.7152	6.53335e-12	7.92332e-11	0.414125	26.1146
LOC103240534	2.71408	0.00035485	0.0014753	0.937152	4.31792
VGF	2.71367	1.74136e-195	3.18042e-192	0.0910786	1429.39
LOC103222374	2.71211	2.15062e-89	4.00805e-87	0.136035	181.85
NAV2	2.7074	7.5357e-149	4.43974e-146	0.104554	460.766
CHORDC1	2.70216	1.90463e-67	2.24426e-65	0.15687	161.363
NETO1	2.69675	4.19693e-09	3.8269e-08	0.488961	26.1031
CCDC19	2.69327	4.78745e-08	3.835e-07	0.530522	20.2649
BEST1	2.69188	3.07081e-15	4.80182e-14	0.353328	45.9908
ZBTB10	2.68995	6.18843e-138	2.89809e-135	0.108002	408.904
LOC103241697	2.68656	0.000196358	0.000867719	0.85291	13.1687
LOC103241405	2.6858	6.17473e-24	1.6609e-22	0.27204	53.856
RGS2	2.68368	5.22477e-26	1.56949e-24	0.259057	67.4541
CCDC81	2.68312	3.05311e-05	0.000161722	0.734132	14.7669
YOD1	2.6825	1.10902e-62	1.11907e-60	0.161612	181.497
MYO10	2.68157	6.5191e-118	2.12616e-115	0.116585	396.26
OTOGL	2.67568	0.000197887	0.00087363	0.850777	14.2004
MYZAP	2.67129	3.70791e-08	3.00984e-07	0.522972	22.3551
CYLD	2.66561	3.08632e-97	6.7914e-95	0.127964	244.264
CNKSR1	2.66465	0.000275013	0.00117137	0.881788	8.82805
FYN	2.66438	0.000321301	0.00134902	0.895179	8.16377
CLDN4	2.66055	5.39477e-85	9.47404e-83	0.137139	270.984
GPBP1	2.65512	3.31569e-131	1.40832e-128	0.109338	315.848
RAB30	2.64991	2.45055e-16	4.14415e-15	0.333853	32.1141
CDKN2C	2.64251	3.18525e-36	1.47654e-34	0.212969	81.1343
SQSTM1	2.64052	3.13002e-177	3.36275e-174	0.0933197	1087.88
RBPJL	2.63246	3.95075e-08	3.19984e-07	0.518313	15.7394
DDR2	2.62888	1.43408e-33	5.95273e-32	0.221115	138.14
LOC103239519	2.62626	5.33905e-05	0.000266938	0.76123	6.78991
BCAS1	2.62273	8.43757e-06	4.93448e-05	0.662512	10.6706
ARL14	2.61991	0.00138864	0.00500043	1.08029	4.752
TNFRSF10D	2.61885	4.93813e-11	5.49939e-10	0.418783	28.494
SYTL3	2.60974	9.38924e-14	1.32523e-12	0.36417	25.1092
ZBTB11	2.60686	7.74756e-61	7.52667e-59	0.159626	150.514
ANLN	2.60561	2.13435e-128	8.12121e-126	0.10848	315.991
LOC103227257	2.60084	5.50683e-12	6.72304e-11	0.394979	20.5119
EEPD1	2.60029	4.0371e-26	1.22076e-24	0.250611	51.2817
FAM46A	2.60014	0.000193245	0.000855409	0.831399	8.85177
LOC103218674	2.59565	3.68046e-47	2.42671e-45	0.181777	140.553
COPS3	2.59521	4.74236e-41	2.61675e-39	0.1955	91.9722
BEST3	2.59329	0.000149906	0.000679843	0.80963	11.5306
LOC103221948	2.58822	1.86546e-22	4.62289e-21	0.271829	57.2977
PCDH10	2.58813	7.05064e-05	0.000344589	0.760767	8.43369
LOC103246661	2.58785	4.48699e-79	7.12612e-77	0.13842	213.939
LOC103230837	2.57249	0.000193444	0.000856083	0.823066	9.32699
LOC103236665	2.57182	5.82035e-41	3.19228e-39	0.19414	97.476
SECTM1	2.56292	0.000939084	0.00354295	0.980593	9.13412
LOC103221002	2.56086	4.04014e-06	2.49184e-05	0.619809	12.1007
DUSP4	2.55841	7.64158e-13	1.00697e-11	0.372251	35.0412
SHISA2	2.55762	0.000904716	0.0034303	0.968654	11.6734
LOC103223044	2.5527	0.000420174	0.0017191	0.894555	6.8394
LOC103222019	2.54868	1.64032e-48	1.12627e-46	0.175838	96.0633
TMEFF1	2.53802	9.14012e-05	0.000434727	0.756832	13.1395
BUB1	2.53762	4.82423e-48	3.27545e-46	0.17593	103.047
SHROOM3	2.53482	6.49279e-22	1.55215e-20	0.269172	55.7847
RELT	2.52055	2.02719e-08	1.6976e-07	0.481758	24.004
GPRC5D	2.50946	5.85832e-06	3.52541e-05	0.61906	16.8534
KLHL26	2.50736	1.6165e-37	7.87299e-36	0.198121	94.8524
CPA5	2.50463	0.000492325	0.00198102	0.883285	6.95155
LOC103222013	2.50157	1.20414e-115	3.72752e-113	0.109921	329.538
CDK5R1	2.49876	3.50265e-15	5.46306e-14	0.328514	84.6333
IGFBP5	2.49438	0.00134048	0.00485282	1.03009	5.11821
LOC103221943	2.4903	6.12775e-18	1.15498e-16	0.29707	38.0173
SEMA7A	2.48837	5.37816e-41	2.95864e-39	0.187912	151.418
CLK1	2.48577	5.3714e-90	1.02191e-87	0.124221	248.703
SLC5A3	2.48436	9.41192e-34	3.94264e-32	0.208008	84.4715
LOC103222018	2.4839	3.54616e-53	2.75605e-51	0.163392	129.999
LOC103226578	2.48051	3.07252e-07	2.23128e-06	0.529219	10.4734
SLC1A5	2.48024	4.5508e-18	8.6579e-17	0.29448	41.0832
HSPA4	2.47827	3.81273e-157	2.5791e-154	0.0930737	577.886
LOC103214847	2.47445	8.96766e-07	6.05268e-06	0.551399	37.3691
LOC103228469	2.47168	0.00163929	0.00579445	1.02333	7.05904
AREG	2.47126	9.19967e-09	8.02784e-08	0.458462	20.1685
LOC103242966	2.47106	0.000101705	0.000478994	0.747583	9.84711
RUNDC3A	2.46599	6.47926e-08	5.10734e-07	0.490592	16.2785
APLNR	2.46579	0.000678893	0.00265566	0.89994	14.0412
SUPV3L1	2.46546	4.24588e-64	4.49927e-62	0.146805	177.331
LOC103244162	2.46484	5.3849e-05	0.000268862	0.710741	5.82392
LOC103234356	2.46326	0.000322835	0.00135484	0.835308	6.90538
FHL2	2.46046	1.67009e-53	1.3262e-51	0.161168	153.919
SH2D5	2.4593	2.32692e-08	1.93177e-07	0.47288	22.6142
LOC103243143	2.45687	0.00101825	0.00380742	0.953869	7.52585
HOXB9	2.45664	2.79007e-05	0.000148585	0.668187	22.7931
ZEB2	2.45254	4.57168e-75	6.57459e-73	0.134544	236.072
LOC103216957	2.45145	0.000751062	0.00290254	0.919702	6.19321
NUFIP1	2.45128	1.56535e-08	1.32789e-07	0.465101	16.8902
HSPD1	2.45074	5.4031e-131	2.24278e-128	0.101029	464.586
AKR1B1	2.44816	3.75587e-118	1.24722e-115	0.106418	322.834
SERTAD1	2.447	2.52263e-26	7.74342e-25	0.234628	59.167
LOC103216760	2.44659	1.41508e-09	1.36746e-08	0.428799	26.06
KIAA0319	2.44311	7.01883e-07	4.81381e-06	0.539187	35.6935
DEPDC1B	2.44162	1.9202e-08	1.6117e-07	0.466124	15.4396
EPC1	2.43932	5.10236e-76	7.57639e-74	0.132941	195.15
LOC103222006	2.4286	1.6301e-78	2.50186e-76	0.130572	213.422
LOC103244493	2.4285	2.18992e-14	3.22554e-13	0.330031	30.9022
ZNF615	2.42839	0.000209358	0.000917839	0.788161	7.2851
SARS	2.42435	7.80144e-36	3.56214e-34	0.196795	84.5863
ZBTB43	2.42434	4.82456e-39	2.47516e-37	0.187792	158.908
LDLR	2.42357	5.62209e-55	4.60457e-53	0.156578	146.149
rna-NC_008066.1:12129..12197	2.42265	1.83957e-11	2.13591e-10	0.379245	24.8009
CTGF	2.42229	2.37355e-13	3.27174e-12	0.344997	77.7398
STK17B	2.41514	3.10921e-43	1.80275e-41	0.177325	125.58
CDK17	2.41309	2.22868e-46	1.42324e-44	0.17002	139.769
LOC103222000	2.4038	7.28912e-31	2.70587e-29	0.211835	85.1953
MAP6	2.40257	0.00301236	0.00987219	1.09803	14.1
DNAH17	2.39654	1.10315e-29	3.88207e-28	0.215037	178.184
DUSP16	2.39273	1.35542e-123	5.05213e-121	0.101611	542.109
SLC20A2	2.38747	4.7013e-30	1.68032e-28	0.212902	74.0517
SLC20A1	2.38145	4.71358e-55	3.89542e-53	0.153775	182.816
IL6	2.37964	4.30723e-12	5.3046e-11	0.358903	26.6417
RSRC2	2.37827	3.25269e-90	6.38787e-88	0.118695	277.048
LOC103221968	2.37665	6.98484e-26	2.08109e-24	0.23017	53.3165
CLK4	2.36912	1.70783e-40	9.17406e-39	0.180066	95.901
GYG1	2.3685	1.44494e-07	1.09458e-06	0.488556	19.5485
MAP2K3	2.36665	2.01849e-68	2.50787e-66	0.136276	257.436
LOC103216795	2.3666	2.49148e-12	3.12531e-11	0.352479	28.6064
C9H10orf10	2.36655	1.05359e-17	1.95955e-16	0.284111	38.997
FAM72A	2.36596	3.24934e-07	2.34754e-06	0.504077	17.6942
DDX10	2.36413	7.2005e-75	1.01946e-72	0.12994	180.83
LOC103221936	2.36398	5.8469e-10	5.86746e-09	0.404689	21.0368
BDKRB2	2.3619	1.60107e-05	8.91249e-05	0.618866	15.2757
PALLD	2.36081	6.32049e-30	2.25024e-28	0.210778	92.915
SKIDA1	2.35814	2.18225e-18	4.23107e-17	0.276476	59.4778
LOC103222071	2.35554	5.18102e-06	3.13747e-05	0.578375	10.304
LOC103220832	2.34793	3.39176e-05	0.000177346	0.649603	9.00507
GZF1	2.34489	4.28753e-35	1.87788e-33	0.192155	127.173
rna-NC_008066.1:1605..1673	2.34195	0.00093212	0.00352032	0.901177	6.03709
LOC103241579	2.33695	0.00169034	0.00595647	1.00591	3.97954
LOC103233820	2.33563	1.56862e-28	5.30542e-27	0.214212	91.2513
GSG2	2.3314	8.2892e-09	7.27855e-08	0.431512	24.8406
ING1	2.32801	4.01314e-18	7.67497e-17	0.2756	77.6386
DPCR1	2.3276	6.38308e-05	0.000314742	0.679391	16.4003
LOC103236969	2.32742	0.000165574	0.00074374	0.736533	7.70427
LOC103243079	2.32737	0.00239714	0.00806436	1.0453	4.00685
LOC103248132	2.32332	0.000497577	0.00199994	0.833323	5.28711
NOVA2	2.32266	0.000277055	0.00117924	0.768237	9.51933
LOC103240069	2.32155	1.03603e-17	1.92885e-16	0.278582	50.2698
EMP1	2.31942	2.02849e-06	1.30498e-05	0.539889	17.4875
LOC103231855	2.31217	7.35475e-11	8.09199e-10	0.372336	30.8777
CCSAP	2.31172	1.55047e-16	2.65396e-15	0.288722	48.1232
LOC103221946	2.31138	2.48175e-21	5.74482e-20	0.249636	48.3769
IRAK2	2.306	6.67985e-16	1.08929e-14	0.294922	47.9321
ZNF821	2.30374	4.79901e-22	1.15938e-20	0.244024	73.6468
TNFSF13	2.30287	6.0831e-09	5.45418e-08	0.423211	39.3572
LOC103230182	2.30175	0.000902538	0.00342417	0.881297	5.20538
SLC25A33	2.29953	1.08278e-10	1.17295e-09	0.375036	40.3779
LOC103232455	2.2991	0.00133358	0.00483551	0.939096	6.3311
METRNL	2.29651	1.69152e-30	6.19117e-29	0.20314	94.0552
DHCR7	2.29591	1.52771e-24	4.22758e-23	0.229172	58.4254
CHD1	2.29072	2.41018e-137	1.10049e-134	0.0921278	548.072
DNAJB4	2.28833	1.14125e-34	4.97463e-33	0.188684	98.5752
HSP90AB1	2.28767	5.13319e-156	3.34831e-153	0.086172	1288.07
RAPGEF6	2.28647	1.68522e-67	2.01169e-65	0.132597	257.073
CEP76	2.28393	3.87853e-11	4.35386e-10	0.363706	30.1381
NAT16	2.27717	1.21917e-34	5.30166e-33	0.187822	127.216
RACGAP1	2.27544	1.67093e-25	4.89067e-24	0.222056	56.2924
GABPB1	2.27188	3.25462e-24	8.92528e-23	0.228342	84.4884
LOC103220451	2.27	0.00148661	0.00531757	0.933073	10.1257
HRC	2.2643	9.7216e-05	0.000460355	0.679366	9.10741
IGFALS	2.26427	0.00150044	0.00535548	0.929702	9.56614
MYC	2.26195	2.92701e-96	6.28928e-94	0.109231	422.247
LOC103225564	2.25592	0.00135864	0.00490786	0.917697	4.42842
LOC103228978	2.25506	3.9206e-93	8.04559e-91	0.110727	1901.61
CDC25C	2.24896	1.26485e-13	1.77566e-12	0.315288	33.0203
LOC103222003	2.24881	4.55926e-37	2.18557e-35	0.178993	107.115
PIM1	2.24297	1.28782e-38	6.49744e-37	0.174561	124.079
RIPK2	2.23904	4.25063e-12	5.23843e-11	0.337866	28.7563
LOC103221972	2.23848	1.54362e-38	7.76656e-37	0.174618	101.033
LOC103236006	2.238	0.000260487	0.00111679	0.743564	6.24151
SQLE	2.23778	6.42688e-16	1.04898e-14	0.286076	51.1243
MARCKSL1	2.23559	1.1151e-05	6.36642e-05	0.570966	15.2953
PPM1D	2.22993	3.82932e-86	6.85674e-84	0.113946	390.745
HSPA8	2.22964	1.88627e-144	1.04397e-141	0.0874375	801.262
MID1	2.22719	2.3514e-25	6.81681e-24	0.218059	81.0094
MRPL18	2.22517	2.12859e-10	2.22661e-09	0.369167	29.2275
LOC103240047	2.22488	5.99995e-08	4.74797e-07	0.441994	18.122
FADS1	2.22215	1.79073e-36	8.36467e-35	0.178494	88.4017
BRD2	2.21756	4.28237e-120	1.5041e-117	0.095592	929.524
LOC103216788	2.21486	0.00244353	0.00820227	0.984933	6.88809
NXN	2.21375	2.02043e-42	1.14957e-40	0.163784	143.259
LOC103228578	2.21222	7.36105e-05	0.00035794	0.649364	7.78853
LIPH	2.21048	6.63492e-08	5.21654e-07	0.441005	38.4212
NOP2	2.20929	2.93488e-42	1.66468e-40	0.163974	161.508
LOC103235309	2.20135	0.000746432	0.00288831	0.817168	9.36192
GDF15	2.2009	6.82271e-82	1.14321e-79	0.115489	303.62
CENPL	2.1925	0.000244127	0.00105557	0.71815	13.5217
ZBTB2	2.18676	4.15741e-17	7.42965e-16	0.267826	66.4244
C6H19orf26	2.18408	3.30935e-19	6.75329e-18	0.25009	109.739
LOC103236338	2.18365	0.00289472	0.00953113	1.01974	4.37599
GADD45A	2.1824	4.84625e-39	2.47932e-37	0.168867	142.814
FRZB	2.1813	0.000772506	0.00297785	0.823597	5.68647
AHR	2.18045	5.30649e-42	3.00055e-40	0.162224	152.029
EXOSC9	2.17935	2.8031e-16	4.70982e-15	0.274669	44.2074
EIF4A2	2.1769	3.46027e-104	8.6573e-102	0.100871	333.847
MED27	2.17621	1.22637e-12	1.57957e-11	0.318967	35.1177
YTHDC1	2.17254	9.88955e-111	2.65902e-108	0.0976271	434.009
SLC3A2	2.17249	1.51916e-68	1.91351e-66	0.125064	260.849
LOC103226170	2.17171	5.17727e-09	4.68339e-08	0.395146	24.1887
ABHD5	2.16951	9.24865e-24	2.45163e-22	0.219842	86.979
C23H5orf45	2.16824	1.6238e-22	4.0295e-21	0.226607	86.308
JUNB	2.16235	2.54687e-111	7.04788e-109	0.0969836	542.555
RRAD	2.16214	0.000391988	0.00161317	0.741791	11.1377
PTX3	2.16092	9.98268e-08	7.72231e-07	0.436997	21.0252
BHLHE40	2.16028	4.22522e-146	2.41155e-143	0.084201	630.629
RRP12	2.1583	2.36977e-41	1.31555e-39	0.161874	204.581
LOC103228946	2.15148	0.000437546	0.00178378	0.745588	9.05437
HES4	2.15124	1.58975e-07	1.19931e-06	0.443721	31.5506
KLB	2.14926	0.000399759	0.00164182	0.739651	7.68205
HNRNPDL	2.13864	6.61825e-99	1.53007e-96	0.101806	420.581
KDM7A	2.13855	7.75944e-22	1.84289e-20	0.227411	82.8014
GTPBP4	2.13778	1.85519e-49	1.3133e-47	0.14582	198.59
PARP2	2.13393	1.46055e-101	3.46435e-99	0.100229	501.471
STAM	2.13368	4.8002e-38	2.3759e-36	0.167693	169.616
FAM160A1	2.13245	6.37331e-23	1.6167e-21	0.220932	95.4258
LOC103221993	2.13051	5.69248e-17	1.01136e-15	0.261123	49.4757
PIP5K1A	2.12935	1.42178e-76	2.14607e-74	0.115641	290.739
TIAM1	2.12927	1.96232e-06	1.26419e-05	0.493468	18.901
CENPW	2.12814	1.50184e-07	1.1358e-06	0.437131	15.5845
DDX31	2.12445	1.9326e-18	3.75899e-17	0.248917	58.6795
DIAPH3	2.12441	4.22786e-19	8.57022e-18	0.243826	53.479
NXT1	2.1222	2.23461e-07	1.65839e-06	0.443789	20.8615
LOC103246660	2.12205	5.35359e-05	0.000267592	0.603207	10.6036
TMEM238	2.12115	5.44814e-05	0.000271649	0.60424	14.5708
LOC103221021	2.12079	1.23785e-05	7.01894e-05	0.545886	11.9583
DDX21	2.12042	4.29161e-90	8.25073e-88	0.105836	375.598
LOC103221933	2.11992	1.72816e-16	2.95534e-15	0.264669	40.3646
PLK2	2.11973	1.32139e-138	6.35101e-136	0.0848618	620.105
LOC103219513	2.11947	0.000989674	0.00371006	0.806949	8.69405
HES1	2.11901	5.3619e-47	3.52265e-45	0.148453	146.361
RIOK1	2.11184	2.38151e-23	6.18717e-22	0.216707	80.2773
ATP6V1H	2.10876	9.43389e-31	3.49494e-29	0.185473	93.355
LOC103222017	2.09864	5.63168e-12	6.86629e-11	0.318211	29.0795
KIF18A	2.09829	1.31163e-21	3.07517e-20	0.224865	73.9206
IER3	2.09749	1.88375e-60	1.78264e-58	0.128746	219.677
SKA3	2.09652	1.62197e-05	9.02611e-05	0.546818	12.1576
TUFT1	2.09223	1.71924e-53	1.35932e-51	0.137006	271.89
LOC103239310	2.09206	5.28361e-19	1.06394e-17	0.240997	55.7568
B3GNT5	2.09175	3.89088e-07	2.76941e-06	0.447825	27.5837
KDM5B	2.08727	3.32923e-83	5.68271e-81	0.108664	324.57
RCAN1	2.08693	8.86025e-62	8.74722e-60	0.126788	264.294
CHAC1	2.08659	1.99182e-05	0.000108788	0.553859	32.2793
LOC103231575	2.08601	0.000786962	0.00302782	0.778911	5.44462
SERPINH1	2.08539	8.62129e-106	2.21774e-103	0.0958936	401.642
RSPO3	2.08391	1.05269e-41	5.91579e-40	0.155677	176.316
USP36	2.08254	1.37959e-129	5.47758e-127	0.086613	711.835
CNKSR3	2.08179	6.99857e-19	1.40155e-17	0.24045	56.3318
C1H11orf48	2.08125	7.77355e-06	4.57692e-05	0.520029	22.82
ARID4B	2.07494	4.0566e-95	8.61509e-93	0.100755	615.259
KHDRBS3	2.07084	7.04016e-14	1.00219e-12	0.286601	45.6935
LOC103220195	2.07042	2.94605e-07	2.14626e-06	0.437758	16.3795
LOC103225754	2.06303	2.10014e-11	2.41999e-10	0.322245	35.7376
TBC1D10A	2.06077	2.02042e-14	2.99035e-13	0.278886	49.1299
RGS9BP	2.05931	0.000726334	0.00281831	0.755488	18.6586
RAP1GDS1	2.05896	1.2121e-20	2.69974e-19	0.226106	96.2499
CNTFR	2.05738	1.38469e-06	9.10042e-06	0.466314	15.7464
POLG2	2.05504	9.66522e-36	4.36944e-34	0.166744	139.878
TAF1D	2.05436	2.51439e-53	1.97094e-51	0.134953	205.436
OSBPL3	2.04615	1.86722e-50	1.35329e-48	0.13813	214.986
CHD2	2.04432	5.97783e-133	2.5995e-130	0.0835905	1089.45
LOC103226363	2.04231	0.00271828	0.00900375	0.921223	4.18032
KPNA2	2.04214	2.19987e-21	5.11176e-20	0.219397	76.1785
CLTB	2.04193	1.13147e-42	6.49848e-41	0.150692	149.028
LOC103236983	2.041	0.00137304	0.00495498	0.821997	5.03352
FSIP1	2.037	8.4521e-09	7.41447e-08	0.375008	24.5528
LOC103222001	2.03651	5.23486e-22	1.26134e-20	0.215719	78.8366
LOC103230207	2.03634	2.50809e-05	0.000134768	0.547307	9.9212
SMTN	2.03601	8.62131e-38	4.23278e-36	0.160326	134.895
FRMD6	2.03249	1.34104e-31	5.0605e-30	0.175947	122.938
TRNAE-UUC	2.03226	2.88672e-09	2.69959e-08	0.36206	27.5343
MAP7D2	2.03066	1.25402e-14	1.87733e-13	0.271902	58.5418
FAM186B	2.02919	0.00142183	0.00510986	0.81478	14.9838
UBC	2.02911	4.15873e-90	8.08032e-88	0.101656	615.048
KDM6A	2.0282	3.38972e-56	2.90656e-54	0.129409	242.186
LRRC42	2.02513	8.9779e-34	3.76948e-32	0.169279	135.987
DHCR24	2.02287	1.28716e-23	3.37283e-22	0.205999	75.0028
LOC103221969	2.02269	1.03147e-15	1.66714e-14	0.259811	44.7583
HSPA4L	2.02262	1.75925e-43	1.02984e-41	0.147644	216.39
MITF	2.02076	3.26834e-37	1.57918e-35	0.160179	154.794
ADM	2.02064	4.40842e-20	9.45016e-19	0.225034	73.423
TIMM44	2.0201	1.96252e-30	7.11178e-29	0.17896	97.5405
NPC1	2.01992	1.04706e-43	6.14905e-42	0.147	213.68
LOC103221939	2.01951	5.93872e-08	4.70155e-07	0.398052	20.1781
KLF11	2.01902	7.71069e-46	4.80642e-44	0.143383	178.495
RND3	2.01808	3.98677e-21	9.1246e-20	0.218294	87.8979
MEF2D	2.01404	2.67202e-60	2.50266e-58	0.123809	240.994
SLC44A4	2.0111	9.93076e-06	5.73973e-05	0.508784	54.3793
LOC103219639	2.01005	0.00287044	0.00946482	0.909309	4.52444
LOC103226872	2.00518	0.00202161	0.00694949	0.850782	9.40053
EEA1	2.00511	1.00777e-80	1.64338e-78	0.105926	480.528
SAP30	2.00151	3.58036e-11	4.03403e-10	0.316794	36.087
GRHL1	2.00071	1.8906e-05	0.000103818	0.527064	25.34
ARID3B	2.00017	1.32568e-11	1.56107e-10	0.309205	97.4274
LOC103215470	1.99971	1.06185e-11	1.26426e-10	0.30705	38.3888
ATG3	1.99968	2.96554e-29	1.02581e-27	0.180672	101.306
TRA2B	1.99859	1.25928e-67	1.51312e-65	0.11557	277.296
ARHGAP26	1.99819	6.56574e-44	3.8808e-42	0.145166	146.935
CKAP5	1.99714	9.9069e-98	2.20658e-95	0.0956234	431.77
RANGAP1	1.99668	4.26179e-64	4.49927e-62	0.118991	366.378
KIF20B	1.99634	4.70435e-66	5.20729e-64	0.116993	215.851
RIPK1	1.9941	2.25506e-51	1.64745e-49	0.133396	236.036
rna-NC_008066.1:9988..10055	1.99343	0.000505933	0.00203085	0.696697	8.34331
EIF2AK3	1.99327	1.39613e-33	5.80841e-32	0.167254	155.128
LOC103220471	1.99313	0.00183201	0.0063867	0.835268	9.52141
PTBP2	1.99169	7.72811e-28	2.53404e-26	0.185224	106.675
KLF6	1.99083	1.446e-89	2.72266e-87	0.0997358	471.768
MXD1	1.99011	7.97995e-30	2.83001e-28	0.177723	121.06
TCP1	1.98849	1.87251e-34	8.06594e-33	0.164558	129.911
LOC103218675	1.98753	1.40766e-32	5.61344e-31	0.169682	104.961
CDC6	1.98648	8.93336e-27	2.80824e-25	0.188422	93.3914
CD83	1.9815	1.13114e-08	9.76331e-08	0.368986	25.2053
TP53BP2	1.97906	2.64689e-98	5.96824e-96	0.0944485	495.834
RAD54B	1.97797	1.08129e-07	8.33277e-07	0.400537	24.0575
LOC103245610	1.97632	0.00243827	0.00818615	0.866219	6.0854
LONRF1	1.97629	5.49361e-21	1.2464e-19	0.214891	108.357
TRIM36	1.97619	1.73605e-07	1.30429e-06	0.407996	31.7226
CENPF	1.96767	1.35174e-105	3.42893e-103	0.0905171	623.305
GRIK3	1.96514	0.000171244	0.000767697	0.613296	51.8922
BMI1	1.96489	5.69567e-30	2.03175e-28	0.175203	116.335
LOC103238978	1.96383	0.00269154	0.00892975	0.872481	6.97335
KLHL15	1.9625	3.18442e-16	5.31144e-15	0.247553	59.2642
FKBP4	1.96097	7.93607e-61	7.66902e-59	0.119958	283.071
TBC1D22B	1.95814	4.83628e-37	2.30626e-35	0.155837	153.75
MAMLD1	1.95757	1.09455e-33	4.57456e-32	0.164051	152.763
FOXD1	1.95582	3.126e-27	9.99882e-26	0.184049	139.661
BCL6	1.95506	2.4395e-66	2.71676e-64	0.114411	329.539
ZNF622	1.95375	9.41018e-28	3.07455e-26	0.181981	106.841
BTBD11	1.94836	6.43872e-22	1.54124e-20	0.20669	83.4521
LOC103230832	1.94573	6.44394e-06	3.84867e-05	0.47568	14.4874
SEMA3C	1.94012	9.94701e-74	1.36596e-71	0.107402	311.675
ZNF274	1.93844	5.13345e-09	4.65066e-08	0.35152	31.0579
TRIB3	1.93828	0.000110706	0.000517385	0.581831	64.9977
CENPU	1.93809	1.65956e-08	1.40332e-07	0.364633	21.7993
LOC103241719	1.93736	6.39729e-06	3.8258e-05	0.476194	12.122
AGO2	1.93649	1.14115e-78	1.78136e-76	0.103848	504.108
CCT4	1.93452	1.07143e-57	9.49929e-56	0.121763	239.029
LOC103220833	1.93196	0.00146854	0.00526014	0.769267	6.48982
PRKCE	1.93104	1.26621e-11	1.49683e-10	0.297363	53.2604
DNAJA1	1.9303	8.67527e-60	8.0429e-58	0.119213	318.729
LOC103233655	1.92915	0.000215125	0.000939512	0.61277	8.41086
LOC103236537	1.9262	0.0024986	0.00836869	0.839881	7.4811
RBFOX3	1.9253	2.21618e-05	0.000120331	0.509783	23.4733
HSPA9	1.92494	2.84789e-102	6.84393e-100	0.0900103	583.684
METTL12	1.92474	6.65301e-25	1.88097e-23	0.190011	96.4211
ATP6V0A4	1.9242	1.26918e-11	1.49937e-10	0.295826	38.0593
OSER1	1.92367	2.74049e-22	6.72747e-21	0.202215	81.1074
PPP1R18	1.92265	1.45289e-52	1.11494e-50	0.126956	310.35
WDR43	1.92243	2.41544e-57	2.12094e-55	0.121367	265.716
ALYREF	1.92113	2.05328e-34	8.80308e-33	0.159038	122.571
NAA16	1.92074	1.16195e-22	2.9151e-21	0.199508	94.5343
KIN	1.91764	2.8073e-22	6.88223e-21	0.201494	81.4748
SLC23A2	1.91713	3.45438e-19	7.04139e-18	0.21898	119.1
VEGFA	1.91617	8.32272e-71	1.11769e-68	0.108358	361.082
ISG20	1.91547	2.45546e-10	2.55099e-09	0.317641	32.9916
PTP4A1	1.91354	1.9349e-69	2.50632e-67	0.109179	350.923
HPS5	1.91331	1.18505e-21	2.79635e-20	0.203861	120.463
SEC23B	1.91276	8.2554e-22	1.9556e-20	0.203518	82.085
CASZ1	1.91125	7.67796e-24	2.05616e-22	0.1932	120.415
LOC103226502	1.91117	0.000869989	0.00331652	0.716018	15.8665
MUC12	1.91046	0.000402725	0.00165327	0.648156	22.9728
HABP4	1.90742	2.71768e-26	8.29029e-25	0.182838	103.586
MACF1	1.90659	2.03672e-115	6.19978e-113	0.083779	2350.69
DHX37	1.90385	3.21205e-32	1.25352e-30	0.163318	169.26
rna-NC_008066.1:14659..14727	1.90328	4.02564e-09	3.68912e-08	0.342758	27.1395
KRT18	1.90311	7.86275e-26	2.33125e-24	0.184306	87.3956
PRKCG	1.90247	5.53538e-08	4.3994e-07	0.373685	31.5621
PPP1R12A	1.89948	5.43857e-109	1.419e-106	0.0859942	705.391
SRFBP1	1.89781	8.37195e-18	1.56987e-16	0.226276	60.8173
LOC103237690	1.89605	0.000395247	0.00162439	0.641403	7.81965
LOC103218065	1.89322	4.93579e-34	2.08674e-32	0.1578	135.332
SPEN	1.89292	7.36726e-130	2.99013e-127	0.0783239	1369.82
PKNOX1	1.88814	2.19385e-11	2.52638e-10	0.294212	48.6481
EHD4	1.88746	1.40987e-19	2.93278e-18	0.213265	76.4438
STAMBPL1	1.88375	2.63818e-32	1.03621e-30	0.161282	125.203
LOC103242316	1.88322	3.67285e-08	2.9827e-07	0.364272	25.7906
RPS12	1.88065	8.48187e-52	6.34889e-50	0.125288	227.272
CPEB2	1.8785	3.9711e-31	1.48017e-29	0.164196	207.29
LOC103222369	1.87381	2.81759e-14	4.12344e-13	0.254729	50.3186
LOC103243203	1.87373	3.54657e-14	5.15721e-13	0.255553	51.1649
LOC103228468	1.87201	1.45527e-07	1.10195e-06	0.381547	31.9705
KAT6A	1.87175	1.81755e-93	3.77225e-91	0.0916633	533.034
CATSPERG	1.8714	0.000884558	0.00336574	0.695541	11.3078
LOC103225990	1.87126	0.00168258	0.00593142	0.762444	10.9047
LOC103238533	1.87068	0.000930605	0.00351605	0.697286	6.73554
SGK1	1.86919	1.18748e-16	2.04412e-15	0.231727	60.7865
FBXW11	1.86892	1.40371e-48	9.67447e-47	0.12868	234.358
GTF2IRD1	1.86735	3.07896e-25	8.85575e-24	0.182949	104.039
LOC103246678	1.86628	0.000740863	0.00286859	0.678264	7.22852
ZBTB48	1.86508	1.74889e-20	3.87643e-19	0.205396	85.8292
UBA2	1.86455	7.45954e-60	6.95108e-58	0.115041	299.232
PAK1IP1	1.86224	1.18693e-12	1.53094e-11	0.271339	45.8372
NRF1	1.86026	2.63236e-18	5.07681e-17	0.218232	64.2525
ZFAND5	1.85866	7.20309e-65	7.83079e-63	0.109977	294.064
SEPT10	1.85824	7.95028e-48	5.31882e-46	0.128911	191.495
CDKN2D	1.85671	3.71244e-05	0.000192789	0.508565	14.4636
CWC22	1.85597	1.16589e-46	7.55098e-45	0.130471	159.536
C25H1orf116	1.85478	0.00137932	0.00497175	0.726686	7.41894
SRRM3	1.84895	1.01592e-05	5.85691e-05	0.464587	22.8919
NES	1.84198	8.19823e-05	0.000394656	0.537586	14.6387
LOC103232182	1.83742	1.37545e-17	2.52983e-16	0.220887	59.2586
FDFT1	1.83267	3.70964e-14	5.39004e-13	0.249749	49.7174
KIF4A	1.8326	1.53974e-16	2.63807e-15	0.228137	53.9821
CDK1	1.83058	8.37444e-13	1.10036e-11	0.26479	41.8493
DIP2B	1.83045	4.8743e-76	7.29707e-74	0.0991117	410.812
KANSL1	1.83012	4.74149e-99	1.11024e-96	0.0869636	731.11
HS3ST3B1	1.82659	2.40372e-13	3.31082e-12	0.258475	75.6723
LOC103224586	1.82589	0.0024563	0.00823304	0.78501	9.37358
MICAL3	1.82454	8.30295e-113	2.36945e-110	0.0810693	1060.96
ZNF330	1.82251	2.26814e-15	3.59595e-14	0.236639	59.0021
AVPI1	1.82178	1.24046e-05	7.03161e-05	0.462509	17.3432
LOC103243846	1.81801	7.42332e-06	4.39195e-05	0.448108	19.4799
RPS27A	1.81615	7.42854e-28	2.44019e-26	0.168642	113.058
LOC103221997	1.81599	9.69996e-15	1.46413e-13	0.241927	45.4614
FOXN2	1.81376	2.85024e-22	6.97811e-21	0.190422	112.022
INTS6	1.81309	1.6704e-25	4.89067e-24	0.176421	139.234
EMC9	1.81169	3.44225e-10	3.52604e-09	0.302744	32.039
ELK1	1.80939	5.02488e-23	1.2782e-21	0.187057	116.807
GTF2H1	1.80905	3.23966e-30	1.16475e-28	0.160518	153.954
FAM83E	1.80679	0.000716686	0.00278442	0.650157	11.2324
RPSA	1.80375	2.27765e-55	1.90821e-53	0.115968	247.073
LOC103221996	1.80343	3.32779e-12	4.14306e-11	0.268845	42.639
DDX20	1.80088	5.99219e-18	1.13176e-16	0.213587	84.2837
SYNJ2	1.80041	2.89184e-23	7.45997e-22	0.184278	120.203
MEGF9	1.79709	1.93432e-08	1.62281e-07	0.339984	46.8786
UBB	1.79626	2.4055e-63	2.4682e-61	0.107595	302.157
ARL13B	1.79463	4.67366e-19	9.4529e-18	0.206196	107.844
LOC103246770	1.79457	6.29272e-75	8.97892e-73	0.0985573	401.17
IFIT3	1.79255	4.22359e-08	3.41326e-07	0.347685	28.2875
RELB	1.79243	1.2678e-21	2.98005e-20	0.191395	95.0235
LOC103222702	1.79222	0.00107688	0.0039976	0.678865	9.38049
BTBD10	1.79152	7.91622e-19	1.57668e-17	0.206924	95.6242
MARCH1	1.79082	6.52093e-06	3.88956e-05	0.438472	16.8121
LOC103221938	1.7877	1.08516e-14	1.63257e-13	0.238343	50.8018
ALX1	1.78758	0.000332156	0.00139044	0.59052	12.4076
CLIP1	1.78681	2.51371e-90	4.99026e-88	0.0890369	595.545
IL7	1.78617	1.26706e-17	2.34463e-16	0.214106	89.7699
MARK3	1.78583	3.56565e-29	1.22412e-27	0.161435	129.561
LOC103226649	1.78566	0.00114717	0.00423355	0.680203	12.3661
PPP2R2A	1.78374	1.67774e-29	5.84776e-28	0.16122	132.94
ELF3	1.78373	8.86799e-56	7.56845e-54	0.114244	259.369
TDG	1.78355	2.68213e-16	4.51487e-15	0.223476	71.2359
SFSWAP	1.78332	1.09774e-55	9.32515e-54	0.114324	326.995
MYBL2	1.78225	2.95621e-20	6.42765e-19	0.197448	74.3045
PITX2	1.78165	5.09418e-05	0.000256168	0.49381	18.5638
TXNIP	1.77801	4.48316e-46	2.81376e-44	0.125871	212.275
INSM2	1.77783	0.00111552	0.00412593	0.675688	12.5795
UVRAG	1.77736	1.51234e-28	5.12456e-27	0.162552	149.526
CCT5	1.777	2.14331e-52	1.63788e-50	0.117541	236.045
NEK10	1.77684	0.00189759	0.00658139	0.728721	9.62064
NUPL2	1.77489	5.32458e-08	4.24258e-07	0.347668	29.3766
TMEM132B	1.77355	1.92934e-05	0.000105691	0.462379	23.5218
NOP58	1.77348	4.11475e-49	2.84666e-47	0.121157	252.963
STK17A	1.77267	1.26076e-10	1.3569e-09	0.287524	47.4098
BRIX1	1.7716	1.41736e-12	1.81026e-11	0.25918	41.4711
LOC103214208	1.77134	0.00131832	0.0047878	0.68416	7.55035
PPFIA3	1.76852	6.71218e-28	2.20885e-26	0.163861	124.356
BIRC5	1.7676	6.81205e-21	1.5341e-19	0.192392	96.1299
LOC103238262	1.76568	3.78354e-33	1.54247e-31	0.14908	141.529
LOC103219103	1.76395	0.00153576	0.00547407	0.69712	8.25018
FOXO1	1.76328	3.37296e-17	6.06336e-16	0.21386	95.594
SUV39H2	1.76238	1.64052e-10	1.74606e-09	0.287721	47.3845
TANC1	1.76155	8.92873e-37	4.22472e-35	0.140501	201.062
DHH	1.76131	0.00176555	0.00617857	0.708603	6.25132
PPM1G	1.75997	9.21164e-68	1.13677e-65	0.101771	344.85
DDX5	1.75971	5.05095e-84	8.70289e-82	0.0909445	625.289
H3F3B	1.75931	1.14972e-67	1.3999e-65	0.101828	343.825
LOC103242710	1.75768	2.73087e-06	1.72883e-05	0.407418	14.2446
LIN54	1.75758	2.61273e-17	4.72464e-16	0.212854	85.6085
CHIC2	1.75688	6.33112e-09	5.66543e-08	0.319053	37.5877
GART	1.7562	8.73063e-30	3.09024e-28	0.157568	139.229
PLK3	1.75619	2.46253e-08	2.04063e-07	0.334414	33.8877
FOXP2	1.75588	2.77802e-23	7.18664e-22	0.179548	107.923
AGTPBP1	1.75267	8.30106e-10	8.17749e-09	0.298871	53.8677
NR3C1	1.75017	3.65111e-47	2.41608e-45	0.122307	268.927
DYRK1A	1.74971	5.3948e-48	3.64928e-46	0.121192	248.86
CDC45	1.74917	3.42944e-08	2.79871e-07	0.335898	25.6685
IL12RB2	1.74721	7.56116e-06	4.46762e-05	0.428855	20.9591
JUND	1.74716	6.53109e-69	8.34153e-67	0.10015	413.874
PUM2	1.74449	1.04413e-70	1.39197e-68	0.0986496	373.325
BUD31	1.74225	4.11552e-19	8.36105e-18	0.199323	83.885
FNDC3A	1.74152	1.06003e-46	6.88979e-45	0.122355	251.181
C22H3orf38	1.73779	6.4334e-10	6.42777e-09	0.294036	46.7784
COPS2	1.73763	3.37426e-32	1.31122e-30	0.14896	166.014
TPT1	1.73643	1.17007e-61	1.14279e-59	0.105532	382.344
GBX2	1.73577	0.000229523	0.000996199	0.545209	18.7881
COL12A1	1.73209	1.34239e-14	2.00469e-13	0.231641	132.308
ITPRIP	1.73173	3.943e-06	2.43458e-05	0.410906	24.7127
LRRC15	1.73078	3.61165e-07	2.58984e-06	0.366709	27.6269
RPLP1	1.73029	1.28908e-40	6.94504e-39	0.131021	193.652
GMDS	1.73019	1.65289e-10	1.75821e-09	0.282317	44.5881
C18H18orf54	1.73013	2.67976e-07	1.9648e-06	0.360547	27.5088
JMJD1C	1.72943	2.9487e-88	5.4399e-86	0.087199	640.785
CHD7	1.72728	1.37367e-96	2.98675e-94	0.0831372	767.08
FBXW7	1.72714	2.18798e-35	9.79441e-34	0.140691	233.991
PRSS12	1.72605	5.36706e-05	0.000268118	0.481245	18.3506
DLL4	1.72598	0.00199626	0.00687141	0.708078	16.5876
PREX1	1.72582	2.69947e-26	8.25847e-25	0.165163	163.104
FAM110A	1.72466	0.00228507	0.00773292	0.724061	10.0737
CEP135	1.72247	8.8317e-12	1.05703e-10	0.261985	45.3952
MYSM1	1.72171	6.60844e-36	3.03257e-34	0.139288	199.975
TRIM47	1.72162	1.06966e-14	1.61057e-13	0.229464	74.2383
CNST	1.72015	2.6137e-23	6.77114e-22	0.175891	96.8509
BYSL	1.71892	1.88712e-16	3.22115e-15	0.214427	76.2
MTHFD2L	1.71823	5.08934e-07	3.55864e-06	0.367906	24.9658
C20H1orf52	1.71821	1.42942e-08	1.21711e-07	0.319072	40.6853
FBXO30	1.71692	4.11725e-14	5.94917e-13	0.234152	75.2178
CAMTA1	1.71594	4.93185e-32	1.90434e-30	0.147386	187.563
RSRP1	1.71204	1.87542e-33	7.76706e-32	0.143369	154.524
CCNB1	1.71201	2.83594e-16	4.76063e-15	0.214801	55.8931
GAPDH	1.7119	1.03762e-69	1.35364e-67	0.0975547	375.698
BCL10	1.70914	7.32883e-17	1.28954e-15	0.210051	95.1412
LOC103222011	1.70761	2.97674e-27	9.53811e-26	0.160283	122.865
LOC103238280	1.70648	4.68501e-08	3.75954e-07	0.3312	25.5002
LOC103216801	1.70639	0.000481432	0.00194318	0.577107	9.75576
KIF23	1.7024	2.05492e-16	3.50102e-15	0.212284	76.9361
OSBPL11	1.70153	1.66834e-18	3.26238e-17	0.198473	95.0903
NXF1	1.70057	6.17996e-29	2.11765e-27	0.15445	159.523
FILIP1L	1.69956	2.7415e-18	5.28173e-17	0.199177	77.9964
LRRC10	1.69942	0.00288452	0.00950267	0.735242	6.44263
POU2F2	1.69837	4.85199e-05	0.000245136	0.472063	31.4929
SRRT	1.69726	1.17138e-77	1.78284e-75	0.0911914	458.82
FASN	1.69349	1.50161e-66	1.69293e-64	0.0988572	630.239
TRNAV-CAC	1.69251	4.52542e-06	2.76614e-05	0.403485	20.5765
FNIP1	1.69188	2.05395e-50	1.48274e-48	0.114107	362.603
SLC25A3	1.69164	1.75459e-53	1.38128e-51	0.110564	323.665
LOC103221970	1.69089	1.58842e-19	3.29669e-18	0.191421	111.335
TRNASTOP-UCA	1.68795	0.000278192	0.00118326	0.540061	11.9079
ARNTL	1.68774	6.31759e-12	7.68717e-11	0.25467	66.1981
PTGES3	1.68734	9.79704e-26	2.90005e-24	0.163214	114.43
DEDD2	1.68561	4.80779e-15	7.42889e-14	0.220968	68.3918
ARID3A	1.6842	2.62524e-16	4.42727e-15	0.211076	105.502
ENC1	1.67997	6.39078e-09	5.7124e-08	0.304698	59.5744
LOC103225253	1.67924	9.82148e-07	6.58273e-06	0.369863	22.0123
CACYBP	1.67439	4.89897e-23	1.24791e-21	0.172066	98.4452
BBC3	1.67434	1.30981e-22	3.26808e-21	0.173843	131.051
SKIL	1.67378	3.54653e-59	3.23869e-57	0.103756	334.6
TRNAE-CUC	1.67374	5.95494e-09	5.34978e-08	0.303302	36.698
C1QBP	1.67363	8.05671e-36	3.66952e-34	0.135413	157.216
DUSP14	1.67194	9.60027e-11	1.04431e-09	0.269083	47.9987
DNAJA2	1.67103	2.87667e-28	9.57005e-27	0.15361	147.388
LOC103230560	1.67022	8.34347e-27	2.62733e-25	0.158133	113.919
E2F3	1.67018	7.12614e-14	1.01207e-12	0.22954	102.826
LOC103232742	1.66972	0.000539531	0.00215294	0.571183	11.7437
CCT8	1.66924	5.71248e-37	2.717e-35	0.132768	232.362
DENND2C	1.66723	7.40475e-07	5.0595e-06	0.363021	31.4346
RPS11	1.66693	3.8596e-39	1.99693e-37	0.128732	173.726
NUP98	1.66601	9.17531e-74	1.26953e-71	0.0921848	586.129
TSPYL2	1.66588	2.05485e-19	4.2311e-18	0.188549	100.005
CEP55	1.66577	4.82077e-08	3.86e-07	0.323713	27.668
TARS	1.66574	4.53318e-39	2.33882e-37	0.128621	191.658
GNA13	1.66528	2.54863e-52	1.93951e-50	0.110121	381.917
IARS	1.66425	3.77352e-43	2.181e-41	0.12187	277.957
XPO6	1.66407	1.52553e-62	1.53089e-60	0.0998422	423.394
OLA1	1.66398	2.53712e-25	7.34356e-24	0.162569	138.053
NME2	1.66361	3.78702e-39	1.96495e-37	0.128356	178.318
USP6NL	1.66306	9.70066e-32	3.68343e-30	0.143617	167.634
BAZ1A	1.66195	1.93567e-44	1.16293e-42	0.119767	321.898
PEA15	1.66055	4.58935e-21	1.04644e-19	0.179791	127.802
CAMKK1	1.65914	8.5298e-13	1.11917e-11	0.240108	61.5295
MTHFD2	1.65865	1.30675e-17	2.41563e-16	0.198888	121.603
LOC103244556	1.65722	7.84616e-24	2.09506e-22	0.167337	137.631
PHF13	1.65601	1.55037e-17	2.84298e-16	0.199067	101.802
CTPS1	1.65522	9.00788e-22	2.12833e-20	0.175482	126.304
TES	1.65458	2.32194e-13	3.20301e-12	0.233181	62.0749
HSPA5	1.65403	6.93553e-82	1.15155e-79	0.0866955	465.024
LOC103230320	1.65397	3.24038e-07	2.342e-06	0.346474	27.5936
SF3B3	1.6523	3.88401e-75	5.62996e-73	0.0905143	424.919
LMCD1	1.6523	1.29043e-11	1.52055e-10	0.253588	57.4794
EPHB2	1.65198	1.8888e-30	6.87193e-29	0.145875	203.501
SRSF7	1.65163	2.99554e-26	9.11843e-25	0.158181	132.526
AGPAT9	1.65123	3.26532e-15	5.10161e-14	0.215172	69.77
ZNF217	1.65107	6.56348e-64	6.85003e-62	0.0982937	452.748
NCAPG2	1.65096	1.29988e-23	3.4013e-22	0.167506	105.783
SPRY4	1.6503	2.84274e-11	3.22884e-10	0.257624	61.1415
UAP1	1.64911	1.45735e-22	3.63126e-21	0.171754	152.697
LOC103235515	1.64882	9.16209e-09	7.99888e-08	0.302825	48.0248
ZNF558	1.6477	5.12618e-06	3.10839e-05	0.39398	24.132
OPTN	1.6438	1.35785e-26	4.23203e-25	0.156286	159.551
NSUN6	1.64345	1.95948e-06	1.26281e-05	0.373304	28.4222
PGAM5	1.64155	9.37742e-24	2.48216e-22	0.166001	106.966
NCAPH	1.63902	1.76568e-15	2.80909e-14	0.211578	64.8992
PLK1	1.63825	2.4026e-21	5.56868e-20	0.175748	85.2756
CEMIP	1.63641	1.95426e-09	1.85609e-08	0.285417	52.5145
SRGAP1	1.63631	4.98849e-16	8.17127e-15	0.207111	109.367
rna-NC_008066.1:657..1604	1.63564	4.02987e-44	2.39745e-42	0.118393	361.136
ZFP36	1.63519	7.73352e-29	2.64504e-27	0.148725	150.938
FABP5	1.63275	0.00160029	0.00567637	0.634065	7.45581
PPA1	1.63254	4.16288e-14	6.01034e-13	0.221502	57.889
KCNH2	1.63213	0.00248804	0.00833486	0.686241	13.9916
ENAH	1.63188	1.16048e-59	1.07046e-57	0.100734	416.134
PHLDB3	1.63039	1.29599e-18	2.55339e-17	0.18882	93.9938
LOC103223365	1.63028	2.49151e-07	1.83933e-06	0.337428	28.2868
SPHK1	1.62998	7.14048e-09	6.34408e-08	0.295987	39.0979
LOC103222806	1.62899	4.2049e-05	0.000215665	0.444174	13.8498
HOXC13	1.62751	0.00118231	0.00435269	0.610161	9.20224
FNBP4	1.62595	3.14406e-49	2.19172e-47	0.111091	298.875
PGM2	1.62552	1.37621e-27	4.47242e-26	0.151372	165.919
PARD6A	1.62517	0.000314487	0.00132193	0.523377	13.9927
EEF1B2	1.62429	3.27133e-35	1.45019e-33	0.132651	175.127
ACLY	1.62398	4.1072e-87	7.50139e-85	0.0824413	730.731
LOC103216271	1.62364	2.10016e-09	1.99155e-08	0.282404	36.448
RHOB	1.62244	2.71986e-52	2.06123e-50	0.10729	406.593
LOC103221779	1.62231	2.67538e-08	2.21e-07	0.308181	28.3133
UBE2F	1.6216	2.20301e-07	1.6376e-06	0.334151	36.0629
LOC103216190	1.62159	1.84088e-11	2.13608e-10	0.250019	65.3376
CDC20	1.62147	6.69783e-14	9.55697e-13	0.222788	54.3503
LOC103215364	1.61885	2.70959e-05	0.000144533	0.428536	24.9658
PAPD5	1.61729	4.62971e-24	1.25829e-22	0.162311	177.034
DHX9	1.61611	1.17942e-71	1.59563e-69	0.0906485	481.04
RARG	1.61485	2.01151e-07	1.50259e-06	0.330884	29.6997
RPL35	1.61309	1.24688e-23	3.27199e-22	0.163756	107.478
DIDO1	1.61194	8.96551e-72	1.22199e-69	0.0904407	739.785
MORC3	1.61159	5.31732e-23	1.3507e-21	0.165916	125.245
TGFB2	1.61082	1.35773e-25	3.99961e-24	0.156138	150.192
LEMD3	1.61049	1.11992e-23	2.95582e-22	0.16299	131.033
LOC103225258	1.61026	6.75762e-05	0.000331777	0.455441	19.5365
LOC103221998	1.61005	7.80266e-07	5.30755e-06	0.34877	27.6808
RPL36	1.61001	3.9519e-21	9.05614e-20	0.173757	93.1771
SMC4	1.60977	1.98865e-51	1.45866e-49	0.107574	287.545
ASAP2	1.609	7.45292e-25	2.09094e-23	0.158859	212.65
ANKRD28	1.60865	3.90557e-40	2.0616e-38	0.122445	256.952
CYR61	1.60637	7.76677e-59	7.02239e-57	0.0999481	440.772
PDE1C	1.60614	9.30067e-13	1.21682e-11	0.232287	60.3815
PAX6	1.60548	3.04202e-08	2.50043e-07	0.305813	30.9745
C19H22orf15	1.60482	0.000486368	0.0019605	0.539163	12.2945
ZEB1	1.60366	9.56136e-54	7.65915e-52	0.104572	363.604
ZNF131	1.60246	1.86392e-18	3.62927e-17	0.186483	111.087
AXIN2	1.60245	7.35936e-05	0.00035794	0.455824	23.9135
DAAM1	1.6015	4.45662e-27	1.42052e-25	0.15057	167.573
UTP14A	1.60082	5.58291e-22	1.34166e-20	0.168614	114.082
WSB2	1.60016	1.72412e-30	6.29788e-29	0.141036	193.935
BCL3	1.59997	1.63011e-18	3.19445e-17	0.186031	77.5779
ABTB2	1.59995	5.29965e-32	2.03346e-30	0.137501	274.211
ODC1	1.59984	2.90712e-39	1.51702e-37	0.12287	277.374
CCDC85B	1.59956	5.27003e-15	8.11567e-14	0.209799	111.751
LOC103231005	1.59858	3.31877e-06	2.07299e-05	0.372687	27.8245
CWC25	1.59803	3.38883e-26	1.02643e-24	0.153068	147.048
CTNNAL1	1.59779	4.89896e-24	1.32752e-22	0.160499	129.571
KIF5B	1.59702	6.85813e-85	1.19292e-82	0.0821363	612.106
KLHL21	1.59639	8.24687e-25	2.31014e-23	0.157693	194.11
MTF2	1.59633	2.8922e-20	6.30347e-19	0.176421	110.853
RGS7	1.59631	5.92153e-09	5.32239e-08	0.288181	47.7273
DDX24	1.59536	5.45829e-44	3.2367e-42	0.115663	234.61
RPL11	1.59505	3.12831e-35	1.39355e-33	0.130139	174.878
LOC103225945	1.59504	1.63508e-08	1.38447e-07	0.297101	45.6997
LOC103227406	1.59233	1.90211e-15	3.02351e-14	0.205614	109.745
AMOTL2	1.59197	9.42655e-79	1.48419e-76	0.0851297	940.034
PHLPP1	1.59184	3.48339e-34	1.483e-32	0.132001	230.127
BAG1	1.58958	1.32608e-17	2.44889e-16	0.190037	96.1055
LOC103241275	1.5892	9.02999e-05	0.000430386	0.456049	19.5839
TRIP10	1.58805	2.39835e-36	1.11743e-34	0.127203	195.92
RLF	1.58769	2.50174e-46	1.58103e-44	0.112239	349.813
CLASP2	1.58726	6.79337e-30	2.41389e-28	0.14134	169.805
JPH1	1.58654	5.02557e-11	5.59336e-10	0.250742	91.0527
TRNAK-UUU	1.58366	0.000123242	0.000571004	0.466551	19.1311
RTCB	1.58349	4.65943e-30	1.66862e-28	0.140697	139.072
NGF	1.5827	0.00013427	0.000616156	0.471608	24.7477
KIAA1524	1.5819	2.29479e-10	2.39189e-09	0.259274	44.1837
FAM133B	1.58169	1.50255e-16	2.57676e-15	0.196366	97.1175
LOC103235015	1.5804	0.000576458	0.00228929	0.543066	23.0716
HK1	1.57952	7.00703e-07	4.80753e-06	0.34143	34.2486
IWS1	1.57776	9.5602e-42	5.38912e-40	0.117603	252.238
TRAPPC13	1.5771	2.52861e-07	1.8622e-06	0.32596	30.8327
SDAD1	1.5764	3.84354e-18	7.37379e-17	0.185292	90.1252
PPP1R14B	1.57635	1.07908e-17	2.00287e-16	0.187942	96.8155
ZNF143	1.57629	1.11724e-16	1.92684e-15	0.19438	102.006
RPL32	1.57624	2.608e-13	3.57334e-12	0.222329	56.4648
EGR1	1.5762	4.48377e-64	4.70641e-62	0.0936955	1051.17
LOC103221935	1.57551	5.28682e-08	4.21468e-07	0.305907	28.9615
LOC103233780	1.57475	0.000721136	0.00279992	0.552655	13.3246
SLC22A8	1.57198	5.95168e-06	3.57806e-05	0.377841	21.4157
USP15	1.57145	1.01823e-22	2.56157e-21	0.162804	131.372
UBR4	1.57109	1.89937e-91	3.85446e-89	0.0777707	1602.36
EIF2B5	1.56886	1.4926e-28	5.06707e-27	0.143383	172.901
SYBU	1.5666	1.0395e-07	8.02425e-07	0.311676	39.9785
LOC103222015	1.56653	3.64377e-11	4.10042e-10	0.245522	51.0346
RANBP9	1.5658	1.30985e-26	4.09642e-25	0.14873	160.419
WDR3	1.56434	2.63356e-19	5.40441e-18	0.177394	128.266
BZW2	1.56433	9.05289e-17	1.5792e-15	0.192129	95.6112
PIP5K1B	1.56415	0.00158739	0.00563699	0.604767	11.465
SERTAD3	1.56277	3.45214e-11	3.89918e-10	0.244968	69.795
LOC103220582	1.56258	5.3214e-05	0.000266128	0.430227	17.8174
PLCB1	1.56227	0.000109245	0.000510817	0.455456	18.0618
METTL22	1.56032	2.11284e-09	2.00254e-08	0.272596	42.7002
CCT6A	1.55961	1.7822e-37	8.63398e-36	0.123085	242.102
BIRC3	1.55776	1.34332e-16	2.3102e-15	0.192715	66.8603
TBC1D31	1.55746	1.32757e-11	1.56229e-10	0.238543	63.8478
JMJD6	1.55639	1.24056e-23	3.26008e-22	0.157744	179.051
SCAF4	1.55628	2.47208e-33	1.01689e-31	0.130788	313.308
RPL19	1.55598	6.8723e-46	4.29848e-44	0.110333	284.514
MAP7D1	1.55586	7.52812e-57	6.54731e-55	0.0984983	369.386
RBBP6	1.55504	2.1695e-63	2.23863e-61	0.0930098	444.157
PRKAG2	1.55494	9.34727e-23	2.35474e-21	0.160835	197.647
CCAR1	1.55461	1.60599e-51	1.18753e-49	0.103621	341.86
CDR2L	1.55444	2.55626e-06	1.62617e-05	0.356652	37.3157
ACAT2	1.55259	5.75838e-08	4.56868e-07	0.30207	26.1586
TRNAR-CCG	1.55187	0.000622064	0.00245545	0.53234	15.2162
KMT2C	1.54951	1.06395e-66	1.2145e-64	0.0902163	1727.65
RPL27A	1.54942	2.72914e-30	9.87031e-29	0.137164	154.93
FAF1	1.54901	6.93161e-25	1.95369e-23	0.152087	158.364
RPL28	1.54889	1.97171e-38	9.86611e-37	0.120636	232.905
ZWILCH	1.54717	1.91915e-05	0.00010526	0.396555	21.4884
ARAP2	1.54699	1.71585e-24	4.74104e-23	0.153819	146.043
SUCO	1.54562	1.55672e-30	5.70923e-29	0.136002	280.068
CENPA	1.54534	7.63031e-07	5.20321e-06	0.334042	21.3046
DDIT4	1.54361	3.28575e-29	1.13442e-27	0.13925	240.227
SOX15	1.54279	0.00101506	0.00379665	0.560111	14.8624
GMPS	1.54159	6.75162e-25	1.9059e-23	0.15171	142.048
SMAP1	1.54145	2.89094e-16	4.84405e-15	0.192943	96.6259
LOC103237237	1.54131	3.66988e-06	2.27672e-05	0.360226	22.8661
RPL9	1.54012	2.24207e-33	9.24361e-32	0.129308	170.137
USP42	1.53788	1.41879e-29	4.96414e-28	0.137805	205.278
LOC103240547	1.53752	9.07242e-05	0.00043207	0.438721	18.4234
RPS10	1.53629	4.13119e-20	8.89764e-19	0.170415	107.167
WHSC1	1.53594	3.65835e-57	3.19694e-55	0.0970082	459.574
EIF4A1	1.53429	2.30376e-49	1.6183e-47	0.10463	325.288
RPL12	1.53372	1.08329e-23	2.86327e-22	0.155244	105.284
RBM19	1.53298	2.6662e-33	1.09428e-31	0.128903	208.972
LOC103224743	1.53084	9.39787e-12	1.12185e-10	0.232529	53.9993
EEF2	1.53048	1.40605e-64	1.51059e-62	0.0906851	1194.89
FAM193A	1.53034	1.83912e-44	1.10857e-42	0.11033	292.513
N4BP3	1.53011	4.63967e-05	0.00023532	0.418517	29.8313
FKBP5	1.52942	9.2053e-08	7.14516e-07	0.302451	46.2736
TEX10	1.52922	8.57865e-13	1.12477e-11	0.220553	62.1772
PMEPA1	1.52916	5.2605e-19	1.06046e-17	0.17508	166.417
IFRD2	1.52865	6.08596e-06	3.65518e-05	0.365082	25.3928
BMP2	1.52739	3.53365e-36	1.63389e-34	0.122893	289.706
DNAH2	1.52731	4.23472e-09	3.85943e-08	0.272905	71.9732
PLK4	1.5253	1.36449e-10	1.46508e-09	0.24675	53.2087
SRRD	1.52259	6.51984e-06	3.88956e-05	0.368395	21.4506
RGMB	1.52116	4.57338e-06	2.79359e-05	0.359391	30.8697
PAPPA	1.5197	5.96286e-05	0.000295939	0.421188	24.2028
RBM15	1.51946	2.55002e-31	9.56338e-30	0.131929	211.324
YBX1	1.51908	2.1452e-50	1.54252e-48	0.10248	306.068
HOMER1	1.51853	8.60874e-17	1.50459e-15	0.186489	138.047
RPL23	1.51851	1.23246e-19	2.57842e-18	0.170635	108.15
LOC103229159	1.51818	0.00074693	0.00288963	0.529183	12.0855
RPS20	1.5168	1.94413e-20	4.29355e-19	0.166787	95.9675
LOC103223515	1.51672	0.0010389	0.0038763	0.54809	14.3703
EGR3	1.51652	0.000145731	0.00066375	0.450953	24.6875
rna-NC_008066.1:1674..3225	1.51627	2.85173e-58	2.54068e-56	0.0948257	550.281
LOC103237602	1.51537	4.86279e-05	0.000245614	0.412928	14.7837
rna-NC_008066.1:583..656	1.51509	0.000216498	0.000945283	0.466993	15.3691
ARHGAP31	1.51442	1.78196e-06	1.15329e-05	0.341269	51.0125
MCM7	1.51437	3.46477e-31	1.29408e-29	0.131702	176.289
TUBB6	1.51377	8.31827e-27	2.62392e-25	0.142857	177.231
DDX39A	1.51365	2.48364e-24	6.8418e-23	0.150936	124.573
ELAVL1	1.51363	1.61667e-20	3.59645e-19	0.166285	125.153
RPL5	1.51358	4.40936e-33	1.78564e-31	0.127713	185.127
PVR	1.51328	1.42547e-10	1.52786e-09	0.245144	62.3728
CDC14A	1.51279	9.17621e-17	1.59766e-15	0.185811	105.346
DYNC1H1	1.50952	1.56068e-79	2.50038e-77	0.0802611	1974.12
LOC103214541	1.50911	1.79217e-05	9.87995e-05	0.385291	17.6731
HUS1	1.50894	1.32766e-08	1.13608e-07	0.278585	37.5651
DAPK3	1.50876	2.02487e-18	3.93428e-17	0.175642	126.926
ZNFX1	1.50703	4.12147e-33	1.67649e-31	0.126983	311.537
LOC103221867	1.50556	3.53561e-11	3.98608e-10	0.235551	54.8029
PAWR	1.5034	6.9493e-26	2.07389e-24	0.144888	156.612
PRR7	1.50332	6.75598e-05	0.000331777	0.419699	23.9893
RSBN1	1.50296	6.44488e-21	1.455e-19	0.163207	135.978
CEBPZ	1.50279	5.66252e-25	1.6059e-23	0.147558	144.116
RPL21	1.50093	2.00406e-11	2.31659e-10	0.23181	59.4385
EBLN2	1.50025	0.000376012	0.00155514	0.482926	10.9076
XPO1	1.50018	1.3483e-46	8.67092e-45	0.105428	347.46
NAA15	1.49674	1.91422e-32	7.5838e-31	0.127488	222.908
LOC103222373	1.49662	4.33759e-13	5.81657e-12	0.212688	68.3353
TBR1	1.49524	0.000462888	0.00187538	0.493347	17.7807
VEGFC	1.49421	1.06403e-10	1.15469e-09	0.240227	53.1322
TAF5	1.4938	0.000209904	0.000920009	0.45639	17.3908
LOC103228383	1.49212	0.000330344	0.00138349	0.475242	11.15
PELI1	1.4906	4.03851e-19	8.21373e-18	0.169722	132.987
HMGB2	1.48979	1.96461e-20	4.33352e-19	0.163555	97.4839
ETF1	1.48947	2.49825e-29	8.65807e-28	0.134038	224.566
MYO1B	1.48903	3.22636e-50	2.30248e-48	0.100564	370.044
RPL27	1.48875	2.22228e-29	7.731e-28	0.13392	168.517
ARHGAP17	1.48835	2.8497e-27	9.14707e-26	0.139293	204.716
BACE2	1.48768	8.63553e-17	1.50783e-15	0.182634	103.572
PDLIM4	1.48757	3.23442e-09	3.00018e-08	0.262515	47.0236
RRP9	1.48588	2.75125e-08	2.26857e-07	0.280967	35.8808
ACSL1	1.48288	3.17142e-08	2.59977e-07	0.282563	62.66
KIF2C	1.48144	6.85063e-10	6.81481e-09	0.250159	45.3725
LOC103232654	1.48092	3.53993e-05	0.000184724	0.394059	17.1332
LOC103240161	1.48032	7.68484e-09	6.79032e-08	0.268531	40.1562
TRIO	1.48019	1.24693e-67	1.50821e-65	0.0856419	1114.58
XRCC6	1.4794	8.93791e-54	7.19128e-52	0.0964568	329.603
TTK	1.47801	4.91709e-05	0.000248219	0.4004	19.2819
WDR74	1.47774	4.62502e-14	6.66704e-13	0.201195	80.4945
EZH2	1.47769	1.72693e-19	3.57198e-18	0.166537	126.223
DUSP6	1.4774	1.71342e-10	1.81519e-09	0.23986	61.446
USP25	1.47628	6.62813e-22	1.58243e-20	0.155983	159.384
STIP1	1.47624	3.56464e-29	1.22412e-27	0.133139	181.428
CSNK1A1	1.47571	3.31737e-54	2.69282e-52	0.0957799	350.853
HNRNPK	1.47442	1.1364e-41	6.36665e-40	0.109889	258.58
GARS	1.47434	1.42691e-35	6.41898e-34	0.119572	229.826
LOC103236729	1.47419	0.000625315	0.00246668	0.504716	21.4901
XPO4	1.4723	1.48363e-21	3.46509e-20	0.156848	149.075
AZIN1	1.47047	4.57934e-28	1.51516e-26	0.135417	187.939
ILF3	1.4695	5.33855e-62	5.2991e-60	0.0889128	504.169
CHAF1A	1.46918	1.43903e-24	4.00038e-23	0.145566	152.68
RBM27	1.46786	2.85806e-40	1.51743e-38	0.111432	327.246
RHEB	1.46741	5.2691e-21	1.19844e-19	0.158474	123.057
PTPRN	1.46711	5.52283e-13	7.34126e-12	0.209132	81.7917
HINT1	1.46566	2.04438e-14	3.02336e-13	0.196709	77.6704
SOCS5	1.46415	4.35084e-20	9.34868e-19	0.16212	142.508
PFDN2	1.46261	2.12039e-08	1.77077e-07	0.273605	36.8744
SSRP1	1.46131	8.75121e-45	5.31004e-43	0.104818	289.135
CCT3	1.46041	1.28448e-39	6.75728e-38	0.111802	253.868
CDC42EP1	1.46006	2.36725e-28	7.94769e-27	0.133643	181.718
RPS18	1.45981	1.48041e-30	5.46227e-29	0.128491	161.513
TTC39C	1.45782	3.1133e-07	2.25999e-06	0.302241	38.308
TMSB10	1.45687	8.25137e-12	9.92773e-11	0.220113	56.3215
PTCH1	1.45608	2.50495e-18	4.84132e-17	0.169819	144.126
ZFR	1.45596	1.07356e-45	6.66921e-44	0.103181	333.737
HDLBP	1.45596	2.29032e-70	3.03119e-68	0.0824959	1059.58
CTSW	1.45584	0.00227515	0.00770361	0.582817	10.0598
LOC103245155	1.45531	7.85111e-08	6.13838e-07	0.28464	32.6421
RPL14	1.45302	1.66829e-37	8.10363e-36	0.114534	204.042
NDUFB9	1.45174	2.36474e-14	3.47742e-13	0.195238	72.4789
RPS21	1.45132	2.77985e-15	4.37683e-14	0.18812	66.3403
NCL	1.451	7.73564e-67	8.88577e-65	0.0844311	557.793
LOC103216627	1.45079	0.00196912	0.00679462	0.565689	8.22733
SCYL2	1.45046	8.03238e-24	2.14166e-22	0.14641	244.013
RAN	1.45013	6.27602e-21	1.42039e-19	0.157048	141.346
BRPF1	1.45004	8.03896e-23	2.03075e-21	0.149747	220.273
SCLT1	1.44997	1.51576e-05	8.4816e-05	0.364048	23.7484
COTL1	1.44939	6.51838e-10	6.50912e-09	0.243599	61.4885
LOC103224452	1.44813	0.00187693	0.00652583	0.562615	9.96051
RPS24	1.44708	3.14985e-22	7.69102e-21	0.151484	110.517
PSPC1	1.44683	1.92617e-17	3.50744e-16	0.173752	102.348
UCK2	1.44604	5.69566e-28	1.87772e-26	0.133512	214.671
ZNF317	1.446	2.5606e-10	2.65872e-09	0.237077	78.9969
ALAS1	1.44548	7.39949e-17	1.30071e-15	0.177018	96.0737
MIER1	1.44425	1.59136e-32	6.31838e-31	0.122837	221.66
PKM	1.44422	1.1262e-61	1.10586e-59	0.0876176	467.256
LOC103234603	1.44238	7.18911e-05	0.0003507	0.402011	17.7563
LOC103221248	1.44189	0.000445608	0.00181381	0.470405	13.8268
MCM8	1.44129	9.55222e-08	7.405e-07	0.284821	34.1934
LOC103225095	1.44087	6.97214e-05	0.000340935	0.401021	29.159
ZNF574	1.44065	5.04726e-17	9.01107e-16	0.175188	121.077
VARS	1.44058	1.25674e-29	4.41406e-28	0.128809	206.114
CHD9	1.43994	3.22731e-50	2.30248e-48	0.0972181	475.109
PABPC1	1.43987	3.2029e-64	3.42093e-62	0.08551	714.858
PER3	1.43978	1.19918e-30	4.43356e-29	0.126388	192.568
LOC103223665	1.43948	0.000508355	0.00203923	0.475048	17.7671
TBC1D9	1.43895	2.75199e-15	4.33669e-14	0.186429	96.3838
TNFSF4	1.43875	6.70611e-10	6.67832e-09	0.241951	48.2193
ZBTB18	1.43867	8.18102e-19	1.62765e-17	0.165222	131.622
HIF1A	1.43844	1.75193e-66	1.96302e-64	0.0838971	537.99
LOC103248380	1.43666	2.08797e-07	1.55715e-06	0.292444	31.4557
FLNC	1.43647	1.5731e-60	1.49641e-58	0.0879724	1467
GTF3C4	1.4362	4.1352e-17	7.39719e-16	0.174103	129.964
LOC103238803	1.43595	0.00070698	0.00275022	0.491421	12.3193
TUBG1	1.43588	9.05406e-09	7.91591e-08	0.261047	38.2332
RPL38	1.43482	1.02222e-19	2.14843e-18	0.160715	103.535
LOC103245901	1.43406	0.000665492	0.00261262	0.486095	14.8881
IPPK	1.43296	8.19812e-08	6.39327e-07	0.282695	94.4747
XRN2	1.43202	2.42123e-31	9.09905e-30	0.124335	232.314
SELPLG	1.43145	1.48178e-14	2.20925e-13	0.190787	93.6282
SPTBN1	1.4313	3.50726e-69	4.51103e-67	0.0817921	1599.33
LOC103222362	1.42771	0.000126279	0.00058256	0.415796	17.215
TRAF3	1.42726	5.96985e-24	1.60816e-22	0.143476	191.852
NPR2	1.42661	1.50486e-10	1.6073e-09	0.228813	61.7072
SETD5	1.42609	7.21334e-50	5.12624e-48	0.0966287	529.183
FAM160B1	1.42591	4.01863e-14	5.81127e-13	0.1932	95.64
CCDC150	1.42537	0.000693506	0.00270414	0.484127	13.5518
SRSF3	1.42534	1.84e-26	5.67665e-25	0.135579	188.223
RPS27	1.42355	7.51005e-17	1.31888e-15	0.174311	86.6387
CARS	1.42263	1.46753e-21	3.43188e-20	0.151675	161.292
SIK1	1.42171	3.15631e-31	1.18129e-29	0.123603	399.793
DENND5A	1.41982	1.93116e-39	1.01062e-37	0.108958	311.622
INTU	1.41928	1.8222e-08	1.53226e-07	0.263834	37.9286
BAIAP2L1	1.41758	9.26105e-12	1.10696e-10	0.214588	92.2247
AGPAT5	1.41694	9.02079e-18	1.6868e-16	0.168105	137.031
EIF3A	1.41693	2.91217e-75	4.25503e-73	0.0775414	877.619
RPLP2	1.41586	4.27047e-11	4.77623e-10	0.222192	59.3272
ZFAT	1.41567	1.74557e-10	1.84604e-09	0.229736	57.9149
COL11A2	1.41538	0.00122971	0.00450903	0.517596	25.974
RYBP	1.41485	2.30559e-16	3.90624e-15	0.175932	105.818
NRDE2	1.41479	4.65588e-16	7.66081e-15	0.177831	92.3253
DNTTIP2	1.41408	3.57385e-25	1.0263e-23	0.13826	166.085
NPM1	1.41401	3.50941e-35	1.55196e-33	0.115261	214.054
USP9X	1.41344	6.96966e-76	1.02656e-73	0.0770044	1089.16
RANBP2	1.41299	1.20542e-60	1.15266e-58	0.0864634	639.721
RPL22L1	1.41278	2.11899e-09	2.00628e-08	0.245487	40.6347
RPS7	1.4126	1.20963e-21	2.85068e-20	0.150007	110.99
KIF3C	1.41222	1.3325e-24	3.70987e-23	0.139847	167.665
LOC103222706	1.41183	2.26746e-09	2.1402e-08	0.246314	61.4913
LOC103240114	1.40967	0.000142481	0.000650242	0.414032	17.4772
LOC103222014	1.40871	2.28067e-13	3.15323e-12	0.197289	88.0382
COPS4	1.4074	1.33773e-08	1.14383e-07	0.259077	45.304
PARD3	1.40627	3.32306e-46	2.09284e-44	0.0991988	408.919
LOC103220486	1.40531	2.6454e-07	1.94116e-06	0.288488	28.3152
RNF10	1.40516	1.08124e-40	5.8773e-39	0.106004	279.402
NCAPG	1.40485	2.62914e-08	2.17377e-07	0.264302	44.195
RPS2	1.40385	5.28857e-21	1.20137e-19	0.151575	106.95
KMT2E	1.40327	5.05817e-55	4.16137e-53	0.0902727	549.932
SNX16	1.40321	9.73373e-05	0.000460801	0.397191	23.5807
GLIS3	1.40313	1.19803e-45	7.4172e-44	0.0996861	463.815
GJA1	1.40273	2.1802e-07	1.62262e-06	0.285293	46.037
HECTD2	1.40267	1.26445e-09	1.22709e-08	0.240207	70.561
FBXO42	1.4012	1.24412e-12	1.59794e-11	0.202874	86.5607
SRPX2	1.40078	0.000459757	0.00186393	0.45381	13.941
ARG2	1.40049	1.25864e-06	8.32286e-06	0.306175	27.1007
LOC103230608	1.39913	0.00066603	0.00261262	0.473677	13.4254
UBR5	1.39853	6.59924e-63	6.69603e-61	0.0839148	883.927
MRPL1	1.39844	8.85402e-07	5.98261e-06	0.302244	27.7792
REV3L	1.39769	1.27836e-37	6.2595e-36	0.109968	384.346
ZNF451	1.39621	1.42635e-12	1.82047e-11	0.202392	74.2434
LOC103226548	1.39548	0.000753654	0.00291194	0.477667	12.1957
RPL7	1.39472	2.78844e-24	7.6699e-23	0.138838	137.922
UIMC1	1.39414	4.35851e-16	7.19095e-15	0.175203	119.679
DNMT1	1.39353	2.80952e-33	1.15052e-31	0.117076	232.355
RTTN	1.39207	1.0529e-10	1.14329e-09	0.222789	60.2385
ME2	1.39121	1.11669e-17	2.07058e-16	0.165623	115.556
C17H6orf1	1.39069	0.00019963	0.000880261	0.418596	19.3127
ACTR3B	1.39017	4.24763e-07	3.01043e-06	0.290738	56.8736
PSMC3	1.38983	2.94414e-13	4.01281e-12	0.195515	65.7524
LMNA	1.38925	9.33162e-57	8.07738e-55	0.0880099	523.373
MEF2A	1.38865	2.57913e-26	7.90355e-25	0.132339	204.284
LOC103228971	1.38808	5.07966e-24	1.37241e-22	0.139212	158.632
LOC103242134	1.38751	3.16245e-06	1.98076e-05	0.317441	38.4138
PSMD2	1.38736	9.49574e-41	5.19252e-39	0.104604	306.893
SMG1	1.3869	7.20091e-67	8.32388e-65	0.080666	1067.99
VGLL3	1.38673	5.67994e-07	3.94e-06	0.293355	41.7232
MED26	1.38642	2.75799e-09	2.58318e-08	0.242353	81.8934
ARHGAP29	1.38592	3.5422e-55	2.94067e-53	0.0890308	426.1
VRK1	1.38492	1.57071e-07	1.18592e-06	0.27631	38.264
NAMPT	1.38479	8.143e-15	1.23627e-13	0.182454	99.5117
NANOS1	1.38476	1.67695e-06	1.09073e-05	0.308719	54.3784
CDH2	1.38379	3.62112e-37	1.74043e-35	0.109572	333.91
TRAPPC8	1.38375	1.5669e-22	3.89359e-21	0.143629	153.463
LOC103226495	1.3829	0.00263853	0.00877461	0.552699	9.82407
LOC103226570	1.38247	1.10606e-05	6.32275e-05	0.339882	23.6735
DHX8	1.3819	1.15028e-28	3.91225e-27	0.125878	188.454
HSPA2	1.38098	4.63515e-12	5.69694e-11	0.205627	75.8754
EEF1G	1.3809	1.85609e-46	1.18946e-44	0.0971783	395.07
HKDC1	1.37987	1.10657e-66	1.25531e-64	0.0803379	688.325
LOC103248994	1.37957	1.69539e-10	1.79818e-09	0.223203	52.2006
GIGYF2	1.37675	1.52614e-54	1.24435e-52	0.0890119	502.892
NAV3	1.37611	1.65207e-35	7.41363e-34	0.111687	354.636
SRM	1.37521	3.83554e-08	3.10929e-07	0.262281	41.7343
LOC103241031	1.37519	0.000736537	0.00285426	0.469567	14.797
CASC5	1.37499	1.82007e-08	1.53188e-07	0.255338	52.5246
BCAR3	1.37343	1.47626e-13	2.06451e-12	0.190553	94.8922
FAU	1.37174	4.34352e-20	9.34394e-19	0.151875	136.848
FRS2	1.37149	6.98581e-20	1.47672e-18	0.152759	135.49
LOC103215144	1.37059	0.00162085	0.00574039	0.509625	9.38307
MYBL1	1.37057	3.58723e-05	0.000186978	0.361165	39.2715
UBE2J2	1.36991	3.56143e-13	4.81109e-12	0.193348	102.807
SLC39A10	1.3694	4.56651e-16	7.52732e-15	0.172134	152.353
RPLP0	1.36934	1.21416e-40	6.56076e-39	0.103388	308.011
DRAP1	1.36894	6.99068e-17	1.2336e-15	0.167205	95.2079
ARVCF	1.36876	4.181e-16	6.91057e-15	0.172007	190.442
GPAM	1.36805	4.65763e-18	8.85191e-17	0.160659	150.792
KIAA1683	1.368	3.15146e-11	3.56619e-10	0.212294	114.251
GTF2H4	1.36761	8.40537e-08	6.54651e-07	0.267977	46.9435
LOC103217158	1.36757	0.00067867	0.00265536	0.459354	12.889
SMURF1	1.36727	1.87052e-28	6.29157e-27	0.125028	311.807
HEBP2	1.36692	6.75953e-05	0.000331782	0.376391	19.7296
WTAP	1.36626	1.05302e-14	1.58683e-13	0.180798	95.7128
RPS5	1.36573	2.09189e-27	6.76216e-26	0.127428	155.609
LOC103229226	1.36556	0.00210623	0.00720378	0.531941	12.3965
KRT8	1.36381	4.33348e-26	1.3039e-24	0.130673	161.722
CCDC18	1.36366	3.11507e-06	1.95443e-05	0.311745	37.6662
ERRFI1	1.36307	1.39764e-16	2.3991e-15	0.168202	150.293
SURF2	1.36305	6.96192e-07	4.78017e-06	0.29059	35.818
LOC103243157	1.36139	0.00211276	0.00722207	0.530255	18.9432
C15H3orf58	1.36037	6.14082e-08	4.85313e-07	0.263435	58.9956
LOC103222010	1.36006	6.20923e-06	3.72554e-05	0.322541	24.8576
LOC103217002	1.35923	4.13012e-20	8.89764e-19	0.150373	112.525
MBIP	1.35819	1.18595e-07	9.09326e-07	0.269568	40.2789
RPL10A	1.35778	6.68282e-19	1.34126e-17	0.155506	107.937
PTRF	1.35627	8.83713e-53	6.83904e-51	0.0892413	713.996
TMEM57	1.35373	3.17255e-13	4.30807e-12	0.190413	102.228
SPTLC2	1.35348	1.86559e-16	3.18738e-15	0.16755	132.658
LOC103230449	1.3534	2.90625e-06	1.83223e-05	0.307376	28.525
TJP1	1.35338	1.26936e-42	7.26761e-41	0.0994791	408.271
CDKN2AIP	1.35282	1.18108e-08	1.01512e-07	0.247512	73.6466
SNRNP48	1.35184	7.36361e-10	7.29729e-09	0.227457	60.5983
AURKB	1.351	9.17183e-06	5.32298e-05	0.327459	24.8858
ZNF10	1.35098	0.000140073	0.000640055	0.393884	21.9831
ABCC1	1.35089	2.65777e-35	1.18683e-33	0.109924	335.001
DEPDC1	1.3506	1.28357e-07	9.80066e-07	0.268911	49.0549
LOC103226645	1.35032	0.00139065	0.00500504	0.49482	14.0232
HEATR1	1.35015	2.71895e-26	8.29029e-25	0.128772	214.053
SLC7A11	1.3501	0.00188954	0.00655968	0.519038	46.3985
DST	1.34982	4.36727e-52	3.28246e-50	0.0893973	2615.52
SYNJ1	1.3496	6.52408e-12	7.91732e-11	0.202473	130.404
RNASEH2A	1.34832	2.31896e-05	0.000125343	0.345765	29.5318
PTPN21	1.34792	1.18585e-11	1.40548e-10	0.204636	134.464
TAF10	1.34741	1.68462e-12	2.1337e-11	0.19647	75.5583
RWDD1	1.34722	1.53245e-08	1.3024e-07	0.248406	52.5597
CDK2AP1	1.34697	2.74861e-10	2.83619e-09	0.220844	61.4044
PPP2R2D	1.346	6.32116e-13	8.35381e-12	0.19195	101.231
RPL31	1.34599	2.78552e-13	3.8023e-12	0.189077	75.1057
TOP2A	1.34554	8.96749e-36	4.07418e-34	0.108653	230.496
SH3BP4	1.34506	2.85669e-23	7.37971e-22	0.137987	231.444
RPS6	1.34467	5.88075e-31	2.1875e-29	0.117379	203.933
LOC103243227	1.3446	2.54614e-14	3.73816e-13	0.180439	87.9451
RPS3	1.34266	5.21394e-32	2.00902e-30	0.115161	212.969
UBXN1	1.34185	4.37083e-22	1.05734e-20	0.140845	135.325
TBCC	1.34114	1.36411e-06	8.98128e-06	0.295098	42.6652
PRPF38B	1.34094	3.29328e-37	1.58703e-35	0.106033	307.779
RPL26	1.34082	1.37426e-15	2.19979e-14	0.171477	94.2874
NFKB1	1.33778	9.68863e-18	1.80749e-16	0.158672	145.48
SCD	1.33709	2.28638e-46	1.44995e-44	0.094117	371.489
USP2	1.33625	7.09307e-06	4.20746e-05	0.319109	29.9965
GTF3A	1.3356	2.90982e-06	1.83385e-05	0.304682	35.8766
CAPZA2	1.3348	3.49197e-21	8.03241e-20	0.143333	131.4
WAC	1.33255	4.2851e-45	2.63512e-43	0.0951425	442.178
LOC103244571	1.33232	9.77413e-13	1.27602e-11	0.191462	73.5467
DAXX	1.33161	8.12959e-22	1.9283e-20	0.14082	165.89
LOC103229949	1.33127	0.000776458	0.00299086	0.453355	14.6714
LOC103227877	1.33117	0.00138019	0.0049739	0.484542	11.5581
GNB2L1	1.33036	1.00697e-43	5.93266e-42	0.0965686	372.357
HAT1	1.33018	9.50064e-11	1.0347e-09	0.211889	61.1115
LARP6	1.32945	3.27807e-07	2.36688e-06	0.274417	54.4594
PSAT1	1.32886	0.000578254	0.00229592	0.436256	18.5024
PFKFB3	1.32795	1.11397e-56	9.59697e-55	0.0841155	701.203
ENOPH1	1.32662	4.12902e-11	4.62369e-10	0.207221	78.7607
LRRFIP2	1.32589	1.30014e-19	2.71691e-18	0.14862	162.186
ANKRD42	1.32558	3.51159e-19	7.15002e-18	0.150344	127.881
LOC103230378	1.32529	3.7181e-49	2.58203e-47	0.0904699	479.087
MAFG	1.32493	2.75976e-25	7.96275e-24	0.129024	302.589
RAF1	1.32366	7.83088e-19	1.5631e-17	0.151943	133.895
LOC103226512	1.32354	0.000204755	0.000900252	0.396566	17.8241
LOC103238779	1.32338	3.26533e-05	0.000171177	0.345598	22.4537
SPECC1	1.32309	2.28175e-18	4.41461e-17	0.153684	151.356
PSD	1.32304	0.00231811	0.00783744	0.514829	14.2447
AURKA	1.32173	7.96665e-09	7.01896e-08	0.238169	48.2202
SAFB	1.32165	1.09878e-40	5.95495e-39	0.0997003	364.387
SLC2A1	1.32071	1.68323e-25	4.91095e-24	0.128063	206.785
C18H18orf8	1.32064	1.55439e-08	1.31921e-07	0.243147	71.3501
EGR2	1.31945	7.71025e-09	6.80948e-08	0.237848	63.0257
SPRED2	1.31886	7.42541e-26	2.20517e-24	0.126871	222.813
CCNE1	1.31738	5.48185e-06	3.30867e-05	0.30992	46.2108
JADE1	1.31699	6.07105e-34	2.55487e-32	0.109346	285.56
EIF3K	1.31557	8.35374e-21	1.87436e-19	0.142727	142.617
ELL2	1.31546	5.97744e-27	1.89864e-25	0.123742	271.825
RASGRP3	1.31538	8.77947e-16	1.42153e-14	0.166619	103.973
NUP205	1.31532	6.80473e-26	2.03407e-24	0.12627	176.135
PDHX	1.31375	8.5043e-12	1.02029e-10	0.197489	82.7657
ENO3	1.31196	8.06181e-18	1.51327e-16	0.155335	127.057
LOC103244719	1.30923	7.1416e-09	6.34408e-08	0.235301	47.7331
ASCC3	1.30772	1.5903e-21	3.70475e-20	0.139167	158.123
EIF3H	1.30684	4.40907e-15	6.84756e-14	0.17008	94.0351
SIRT1	1.30674	5.46695e-17	9.72233e-16	0.158534	136.335
ADTRP	1.30609	1.39726e-09	1.35239e-08	0.223794	75.8039
CDK14	1.30492	1.78998e-30	6.5254e-29	0.114787	363.373
LYST	1.30459	4.54674e-20	9.73525e-19	0.144315	161.663
POC1A	1.30394	9.07852e-06	5.27386e-05	0.314525	39.3647
LOC103216341	1.30387	0.000114566	0.000534468	0.371734	19.3886
PLEKHG7	1.30257	0.000382144	0.00157801	0.413235	30.2283
DHX30	1.30257	2.40796e-22	5.91911e-21	0.135733	152.481
PRKG1	1.30217	1.42157e-06	9.32599e-06	0.285272	47.1829
SHOC2	1.3003	5.53234e-15	8.51245e-14	0.169765	118.063
LOC103240537	1.29959	2.95508e-06	1.86045e-05	0.295196	31.1476
LOC103222378	1.29923	0.00227399	0.00770114	0.501812	10.537
LOC103229950	1.29855	0.000150209	0.000680579	0.376058	20.1446
MID1IP1	1.29824	4.18772e-09	3.82041e-08	0.230319	66.6078
NUP155	1.29756	1.04083e-16	1.80529e-15	0.159222	120.352
AHI1	1.296	2.65925e-11	3.02797e-10	0.200053	82.6156
TET3	1.29584	4.22394e-26	1.27442e-24	0.12404	325.479
FXR1	1.29579	5.15302e-39	2.6289e-37	0.0999153	340.192
TRIP6	1.29499	7.74335e-15	1.17854e-13	0.17027	104.428
MAST2	1.29476	1.40224e-26	4.35553e-25	0.122646	287.032
RPP21	1.2947	0.000330634	0.00138439	0.402917	15.9305
PAXIP1	1.29351	6.69679e-17	1.18518e-15	0.15765	154.066
RBM33	1.29344	7.48651e-47	4.90084e-45	0.0904464	485.122
RPS23	1.29322	3.04554e-09	2.8365e-08	0.226354	46.4742
NR6A1	1.2932	1.39054e-06	9.13223e-06	0.283832	71.2413
TRA2A	1.29318	2.66434e-13	3.64779e-12	0.181089	92.3466
KIF1C	1.29286	1.51449e-24	4.1994e-23	0.128073	307.249
CUBN	1.29274	7.955e-05	0.000383959	0.357569	25.2878
DPYSL2	1.29217	1.21555e-10	1.31055e-09	0.206795	76.9249
SEC11C	1.29208	5.8188e-08	4.61249e-07	0.248762	43.8859
UTRN	1.29176	2.49234e-55	2.07855e-53	0.0828612	814.697
YWHAZ	1.29033	2.16259e-40	1.1549e-38	0.0976343	360.809
LOC103245450	1.2891	0.0007415	0.00287044	0.433967	16.9132
VIM	1.28905	7.79186e-48	5.23201e-46	0.0892806	523.977
SCYL1	1.28884	1.51522e-24	4.1994e-23	0.127483	211.49
PSMC5	1.28884	8.46316e-20	1.78283e-18	0.143673	120.367
RNPS1	1.28809	8.01447e-17	1.40476e-15	0.157364	129.057
NBL1	1.28767	6.12421e-15	9.41521e-14	0.168422	105.561
CDKN3	1.28744	0.000513715	0.00205756	0.41709	14.2469
CFL2	1.28741	7.88825e-07	5.35979e-06	0.274727	41.7582
DLC1	1.28724	2.87142e-15	4.50546e-14	0.165575	130.639
HS3ST3A1	1.28716	1.44078e-11	1.68899e-10	0.19582	91.6562
ANXA1	1.28695	9.94193e-14	1.40108e-12	0.177038	87.5832
DGKH	1.28627	6.80627e-05	0.000333807	0.353251	41.4098
YTHDF1	1.28624	1.09182e-16	1.89015e-15	0.157885	168.511
RSF1	1.28475	2.91499e-45	1.79863e-43	0.0915382	479.868
FRYL	1.28332	8.84169e-30	3.12349e-28	0.114277	346.177
NFKBIB	1.28331	0.000200361	0.000883271	0.382327	26.5229
MTDH	1.28309	9.59842e-36	4.35001e-34	0.103644	341.591
DNAJC21	1.28241	5.92994e-20	1.26229e-18	0.142401	169.111
ANKRD32	1.28187	4.50625e-05	0.000229263	0.339926	24.399
MDH2	1.28103	1.2805e-21	3.00605e-20	0.136051	147.49
WDR33	1.28068	4.12464e-35	1.81088e-33	0.104398	280.22
PFKP	1.27937	4.34873e-33	1.765e-31	0.107747	287.734
NABP1	1.2786	2.5822e-07	1.89708e-06	0.26102	74.0445
PSMD6	1.27839	3.90889e-14	5.65705e-13	0.172734	87.1004
RPL37	1.27754	2.24412e-10	2.34209e-09	0.207714	61.0988
WBP11	1.27662	1.46539e-25	4.30981e-24	0.123582	190.861
INPP5D	1.27628	0.00199466	0.0068685	0.48363	14.351
MEX3C	1.27621	4.99528e-18	9.47392e-17	0.149593	213.448
ACSL4	1.27496	2.24244e-12	2.82455e-11	0.18639	92.2465
USP47	1.27463	1.28752e-39	6.75728e-38	0.097282	354.505
CSTF3	1.27391	1.10811e-05	6.32849e-05	0.309776	36.6047
RPL36A	1.27316	2.10613e-10	2.20564e-09	0.206741	56.1868
C2CD3	1.27182	1.36761e-18	2.6916e-17	0.146984	160.914
LOC103246949	1.27162	8.77744e-19	1.74251e-17	0.145965	122.082
MIIP	1.26988	0.000335288	0.00140227	0.395045	30.5708
ABCE1	1.26931	1.15272e-14	1.72993e-13	0.167898	118.49
ZNF614	1.26878	1.00779e-06	6.74717e-06	0.273941	46.4175
SNX5	1.26807	2.05752e-19	4.23181e-18	0.142872	138.745
AHSA1	1.26772	1.00578e-13	1.41632e-12	0.174245	100.434
ASXL1	1.26685	4.23945e-36	1.95529e-34	0.101833	396.094
CENPE	1.26641	2.10149e-10	2.20204e-09	0.205237	76.9552
TAF3	1.2656	7.84126e-17	1.37572e-15	0.154555	143.92
LOC103238230	1.26505	3.16593e-05	0.000166876	0.327971	23.5164
HDAC2	1.26491	1.04321e-24	2.91779e-23	0.124804	181.325
FLII	1.26302	6.34329e-45	3.87471e-43	0.0903742	650.931
CDK11B	1.2626	4.49817e-34	1.90614e-32	0.104529	313.469
ANKRD17	1.26208	3.09425e-52	2.33526e-50	0.083406	633.197
LOC103221585	1.26101	0.00125687	0.00459477	0.449003	17.857
MKI67	1.26043	1.93693e-51	1.42646e-49	0.0839678	452.041
ETS1	1.25939	1.2649e-29	4.43419e-28	0.112384	371.933
HMMR	1.25728	1.72375e-07	1.29665e-06	0.2521	53.9504
GLA	1.25507	9.5071e-05	0.000450656	0.350773	23.1794
HMGN1	1.25426	7.16031e-16	1.16349e-14	0.158331	112.509
BTG3	1.25414	5.34616e-07	3.72538e-06	0.263408	45.6231
ANKRD13C	1.25382	4.4745e-18	8.52161e-17	0.147098	126.076
ZC3H10	1.25282	4.94267e-16	8.10349e-15	0.157425	108.641
MAFF	1.25253	2.56374e-15	4.05053e-14	0.161364	137.44
EIF2S1	1.2515	2.76784e-09	2.59108e-08	0.218153	62.0892
HNRNPC	1.25124	2.5613e-36	1.19032e-34	0.100104	350.851
EFNB2	1.25085	3.40431e-07	2.44982e-06	0.257583	74.7431
NAP1L1	1.25016	1.74349e-48	1.19262e-46	0.0859897	439.844
RANBP1	1.24955	1.47251e-12	1.87675e-11	0.180959	86.3369
SRGAP2	1.24823	3.52993e-32	1.3659e-30	0.106342	325.166
PUM1	1.248	5.8268e-34	2.45775e-32	0.103545	311.786
USP22	1.24591	8.54559e-38	4.20692e-36	0.0976209	444.602
GLRX3	1.24523	6.75242e-09	6.01885e-08	0.22269	59.7633
HDAC5	1.24364	3.9932e-34	1.69609e-32	0.102896	300.157
CHD8	1.24314	1.00252e-51	7.47345e-50	0.0825462	585.13
TUFM	1.24297	2.48507e-28	8.32794e-27	0.113758	242.258
NEK2	1.24243	8.48544e-05	0.000406553	0.343483	20.9446
SLC25A38	1.24185	6.58809e-10	6.57154e-09	0.207531	88.0505
TCF7L2	1.2418	8.06752e-21	1.81236e-19	0.134642	179.459
RPS19	1.2418	2.15718e-13	2.98475e-12	0.173152	86.5569
HMGA1	1.24081	2.38643e-22	5.87409e-21	0.129216	154.047
FRG1	1.23969	4.61722e-06	2.81848e-05	0.286406	38.1217
ABL2	1.23951	1.04432e-28	3.56513e-27	0.112601	395.531
RPS8	1.23883	8.06202e-24	2.14642e-22	0.124571	161.355
LOC103225896	1.23882	0.000150009	0.000679843	0.357127	28.7934
ATP5B	1.23853	1.48963e-34	6.44705e-33	0.10185	282.726
ZC3H12C	1.23842	2.58947e-10	2.68412e-09	0.201383	91.8929
RFX2	1.23765	2.66141e-05	0.000142212	0.316519	31.5021
RPL18A	1.23722	4.15511e-18	7.92988e-17	0.144834	114.828
TRIB1	1.23652	1.08029e-32	4.31737e-31	0.104706	330.701
PNP	1.23612	1.33924e-07	1.01916e-06	0.244933	52.6612
SAAL1	1.23481	0.000286131	0.00121335	0.37589	17.537
SPPL2A	1.23344	2.08209e-10	2.18425e-09	0.19991	69.5989
RUNX1	1.23325	3.68805e-22	8.98113e-21	0.128313	256.021
ARNTL2	1.23278	5.45036e-08	4.33749e-07	0.236498	77.9354
MTHFD1L	1.23228	1.04744e-09	1.02411e-08	0.208609	70.5176
CEP350	1.23213	5.75035e-45	3.52431e-43	0.0880836	611.808
RPL13A	1.23067	1.11362e-26	3.48871e-25	0.116276	224.56
SART3	1.2303	2.37963e-22	5.86525e-21	0.128101	190.286
OXCT1	1.23024	2.31316e-05	0.000125067	0.312206	38.4544
EIF4A3	1.23021	4.2012e-12	5.18451e-11	0.181899	84.0218
NUAK2	1.22989	1.69169e-23	4.41387e-22	0.124555	269.947
PLEKHM1	1.22925	6.86596e-20	1.45307e-18	0.136529	300.276
LARP1B	1.22877	6.50879e-08	5.1262e-07	0.237001	76.3889
RPL8	1.22538	6.9838e-10	6.93972e-09	0.20518	68.8904
PTPN2	1.22526	1.87422e-09	1.78471e-08	0.210757	66.3434
SPATA2	1.22513	6.95931e-10	6.91915e-09	0.204917	84.073
IPMK	1.22452	1.10226e-14	1.65693e-13	0.161499	130.896
PRSS23	1.22415	1.78765e-14	2.65229e-13	0.162664	107.741
LYPD1	1.22328	0.00091245	0.00345675	0.418637	21.9756
DYRK3	1.22305	0.00051162	0.00205097	0.392044	28.6531
ZNF202	1.22269	1.33133e-05	7.51638e-05	0.299537	44.5869
PPIF	1.22232	2.64707e-08	2.18761e-07	0.227984	75.0774
QKI	1.22197	4.4785e-10	4.53914e-09	0.202083	94.8032
BRIP1	1.22158	2.23351e-08	1.85844e-07	0.227925	64.4014
ATF2	1.22152	2.39677e-21	5.56222e-20	0.130351	196.659
KIAA1841	1.22138	0.000429902	0.00175458	0.386533	29.3655
LOC103221940	1.22062	1.52537e-05	8.52749e-05	0.301745	32.0644
CHD4	1.22053	2.81809e-53	2.19955e-51	0.0797886	865.625
EIF5A	1.22023	2.14788e-17	3.89949e-16	0.146113	133.688
DDX3X	1.22009	3.31099e-38	1.64326e-36	0.0950676	697.529
KARS	1.21971	1.06959e-16	1.85341e-15	0.149649	126.161
CNOT4	1.21967	1.00889e-17	1.88024e-16	0.144551	167.384
SREK1	1.21847	2.63047e-32	1.03541e-30	0.10375	371.164
NAT10	1.21786	3.28875e-09	3.04748e-08	0.213277	87.33
XRCC5	1.21749	1.95707e-30	7.10617e-29	0.107157	267.63
SSFA2	1.21711	1.03099e-36	4.8531e-35	0.0967686	532.444
SEC24D	1.21492	7.07002e-09	6.28966e-08	0.217333	60.9386
PRIM2	1.21475	0.000501917	0.00201606	0.387972	23.0456
CHMP2A	1.21402	1.24047e-12	1.59439e-11	0.174876	89.494
TXN	1.21342	5.6761e-07	3.94e-06	0.254374	36.0401
TRIP12	1.21336	1.42983e-52	1.10187e-50	0.0799003	748.433
LOC103240049	1.21141	3.09292e-05	0.000163452	0.311734	24.7648
CTIF	1.21069	2.91862e-11	3.30886e-10	0.186968	192.143
PSMD3	1.21042	1.68252e-25	4.91095e-24	0.117168	210.932
PRPF4	1.20991	5.52779e-08	4.39528e-07	0.231498	55.0201
RPS14	1.20861	1.51911e-17	2.78845e-16	0.143866	128.299
NUP153	1.20765	3.21682e-21	7.41818e-20	0.129341	203.737
ORC1	1.20714	2.27055e-05	0.000122981	0.305917	52.1605
LRIG3	1.20648	1.78822e-17	3.27254e-16	0.144123	136.536
RPS9	1.20578	4.37583e-11	4.88808e-10	0.187907	73.9779
LOC103220041	1.2044	0.00135733	0.00490568	0.429825	22.3872
GNL3	1.20398	9.58866e-11	1.04367e-09	0.191243	82.1571
AP1S1	1.20346	6.47112e-15	9.94017e-14	0.157378	107.281
ZRANB1	1.20346	1.60962e-19	3.3369e-18	0.135069	228.808
PPP2CA	1.20323	5.2113e-17	9.29483e-16	0.146039	153.425
SHMT1	1.20309	7.78687e-08	6.09077e-07	0.233307	53.0878
LOC103237988	1.20274	6.19369e-24	1.66355e-22	0.120533	257.484
HMGCS1	1.20254	2.15808e-09	2.04012e-08	0.207504	90.678
MRPS30	1.20224	8.43356e-07	5.70907e-06	0.256019	41.0975
PCBD1	1.20204	4.83156e-10	4.88073e-09	0.199002	67.0679
FGFR1	1.20178	4.00773e-35	1.76379e-33	0.0978596	449.964
SPSB1	1.20134	2.4671e-05	0.000132839	0.305419	41.1767
LOC103232177	1.20132	1.41089e-07	1.07101e-06	0.238201	51.9775
LOC103227869	1.20128	2.46137e-05	0.00013257	0.304772	23.6127
POLA2	1.20055	7.63217e-07	5.20321e-06	0.255164	59.5224
MARCH6	1.20053	2.47992e-23	6.4337e-22	0.122065	251.478
ASNS	1.19964	3.1485e-07	2.28282e-06	0.245167	54.3023
KIAA1429	1.19871	4.55815e-25	1.30282e-23	0.117069	210.111
PDIA4	1.19784	3.179e-35	1.41268e-33	0.0974674	430.251
SF3A1	1.19691	1.09331e-38	5.54674e-37	0.0926331	362.771
LCN2	1.19625	0.00180967	0.00631481	0.440597	25.8869
LATS2	1.19501	1.91149e-23	4.97313e-22	0.121066	255.986
RP2	1.19461	0.000146464	0.000666587	0.342678	27.5893
FGFR1OP2	1.1944	1.48143e-10	1.5832e-09	0.19181	94.9753
RPS16	1.19367	1.10061e-18	2.1755e-17	0.137196	143.044
NFX1	1.19345	6.40595e-13	8.45974e-12	0.169535	146.602
YARS	1.19333	2.2398e-16	3.80183e-15	0.147841	172.615
VAPA	1.19254	3.27042e-14	4.76704e-13	0.160277	115.495
MCM10	1.1918	1.19587e-08	1.02735e-07	0.217249	98.9762
LOC103246584	1.19153	0.00273789	0.0090654	0.462942	17.8793
TXNRD1	1.19129	3.80396e-21	8.72808e-20	0.127622	213.434
CPSF3	1.19017	3.86213e-14	5.60269e-13	0.160114	117.032
TANK	1.18975	2.69959e-06	1.7108e-05	0.267214	40.2434
HSPB8	1.18967	0.000763529	0.00294636	0.396988	31.3591
RBBP8	1.18824	2.2014e-11	2.53348e-10	0.181519	113.654
MOK	1.18773	6.44821e-06	3.84995e-05	0.278545	29.7364
PELO	1.18595	7.63877e-15	1.16359e-13	0.155204	113.555
LOC103244257	1.18594	3.57021e-08	2.90581e-07	0.223239	68.1065
STK3	1.18578	2.3401e-12	2.93743e-11	0.172935	90.1167
TRNAG-CCC	1.18566	0.000408662	0.00167538	0.370889	23.3157
KIF2A	1.18493	2.31652e-13	3.19796e-12	0.165037	128.391
CSF1	1.18473	8.86262e-15	1.34107e-13	0.155649	131.781
COX1	1.18369	1.49839e-42	8.55207e-41	0.0870491	865.205
EEFSEC	1.18353	5.0901e-05	0.000256033	0.314798	35.3029
RPL6	1.18271	4.32519e-06	2.65441e-05	0.272015	31.3751
COX2	1.18214	5.44754e-33	2.19149e-31	0.0994425	558.138
PHIP	1.18191	1.77456e-38	8.90402e-37	0.0917487	550.373
CDK2AP2	1.18187	5.14215e-06	3.11703e-05	0.274467	32.9042
CIRH1A	1.18129	1.13737e-12	1.47221e-11	0.169744	102.944
LOC103226171	1.18063	0.00169495	0.00596694	0.429495	14.5354
TGIF2	1.17985	8.92809e-06	5.19804e-05	0.282473	60.4273
CDK7	1.17965	8.64956e-06	5.05198e-05	0.281064	39.0822
PRMT3	1.17956	4.75151e-06	2.89561e-05	0.272512	38.2359
MSMO1	1.17931	0.000172132	0.000770922	0.341475	22.9419
LOC103224436	1.17853	5.79781e-05	0.000288453	0.315773	22.9719
CTDSPL2	1.17741	8.9109e-14	1.26162e-12	0.161141	109.016
LOC103226354	1.17702	0.000379426	0.00156855	0.36553	19.8471
CHRM1	1.17679	2.10795e-06	1.35229e-05	0.260732	47.1396
EIF3D	1.17673	1.51585e-26	4.68451e-25	0.111399	246.711
LOC103215514	1.1766	0.00233016	0.00787238	0.445459	15.1691
HPRT1	1.17654	1.07579e-11	1.27918e-10	0.177342	79.8144
SRRM1	1.17612	5.30677e-36	2.44138e-34	0.0945419	336.494
LOC103230439	1.17441	2.80475e-06	1.77314e-05	0.264243	42.8915
RPL15	1.17343	1.90376e-17	3.47009e-16	0.140146	141.982
LOC103215820	1.17222	0.000359208	0.00149239	0.361921	19.8276
U2AF1	1.17215	4.24795e-13	5.70474e-12	0.165126	102.893
GATAD2A	1.17202	7.1156e-26	2.1166e-24	0.112552	318.313
HELQ	1.17126	1.0806e-06	7.19767e-06	0.252093	47.9218
FERMT2	1.17114	7.91469e-19	1.57668e-17	0.133979	186.484
SUPT6H	1.17089	4.67016e-37	2.23287e-35	0.092671	457.472
RAD21	1.17086	6.31124e-27	1.99772e-25	0.110037	259.348
NT5DC2	1.17081	9.32961e-05	0.000442932	0.323069	23.5386
RHOA	1.16931	6.23268e-26	1.86919e-24	0.112069	233.159
CCT7	1.1689	9.64849e-21	2.15692e-19	0.12667	188.676
FAM83G	1.16839	3.58223e-10	3.66122e-09	0.192312	234.613
LOC103222360	1.16739	1.18201e-06	7.8417e-06	0.252062	45.4331
FAM19A4	1.16622	6.95587e-14	9.90967e-13	0.158745	99.1021
DOCK9	1.16478	1.95346e-10	2.05518e-09	0.187498	162.936
NELFA	1.16463	8.59785e-07	5.81381e-06	0.247076	57.447
CRELD2	1.16356	2.95286e-06	1.85969e-05	0.262194	35.7544
TM4SF1	1.16339	4.32438e-18	8.2443e-17	0.136129	194.249
ING2	1.16323	2.30448e-09	2.17402e-08	0.200893	79.248
CWC27	1.16312	1.11942e-06	7.44269e-06	0.250071	50.5177
ZCCHC2	1.16245	2.96023e-15	4.64083e-14	0.150343	230.425
CPEB4	1.16184	7.04314e-23	1.78166e-21	0.118657	289.762
SGOL2	1.1618	2.16549e-05	0.000117815	0.291969	40.3382
PA2G4	1.16162	3.70817e-16	6.15132e-15	0.144886	124.813
VDR	1.15954	1.72889e-05	9.56283e-05	0.287498	51.8613
BZW1	1.15926	2.02098e-25	5.87757e-24	0.112998	239.354
RPL13	1.15914	1.69404e-15	2.69981e-14	0.14822	123.845
PPP1R3C	1.15903	7.5368e-05	0.000365319	0.315903	51.4966
LOC103229927	1.15899	7.4553e-19	1.49139e-17	0.132494	181.196
AMMECR1L	1.15887	1.78114e-12	2.25126e-11	0.167983	176.763
LOC103241899	1.15766	1.28776e-46	8.31086e-45	0.0811769	1213.29
LOC103244555	1.15744	1.1246e-06	7.47317e-06	0.249364	65.4361
ZNF503	1.15582	2.10824e-16	3.58518e-15	0.142866	180.309
STK38L	1.15579	8.7068e-09	7.6269e-08	0.207539	88.5768
RPS29	1.15556	5.57854e-06	3.36259e-05	0.268138	31.4969
AXL	1.15528	2.63102e-38	1.31292e-36	0.0898902	604.179
SLC35B1	1.15326	1.29905e-06	8.58077e-06	0.250207	45.9733
DPF3	1.15257	0.00288049	0.00949246	0.447196	15.6517
RPL4	1.15238	7.90054e-28	2.58594e-26	0.106334	262.947
ANXA5	1.15167	6.93351e-21	1.55953e-19	0.12438	193.539
DTNA	1.14855	3.39629e-06	2.11634e-05	0.260978	59.8311
AKAP2	1.14701	8.55232e-18	1.60205e-16	0.135224	290.675
CDC37	1.14685	3.02291e-19	6.17566e-18	0.1296	211.405
PRC1	1.1467	2.11929e-13	2.93455e-12	0.159202	113.611
ILF2	1.14609	8.75241e-06	5.10552e-05	0.272153	36.0921
FBXO38	1.14595	6.98056e-16	1.13529e-14	0.144327	208.481
LOC103218934	1.14497	9.45816e-10	9.28232e-09	0.192594	63.792
TOPORS	1.14447	1.29394e-12	1.65843e-11	0.164899	141.009
ARID1A	1.14425	2.82412e-34	1.20513e-32	0.0944215	638.67
TTC4	1.14411	5.63737e-06	3.39693e-05	0.266409	44.7956
SLC7A6	1.14376	2.25837e-05	0.000122394	0.28757	55.0406
FOXO3	1.14277	5.57099e-32	2.13309e-30	0.0978792	459.131
LETM1	1.14242	2.6228e-20	5.74374e-19	0.125364	241.256
FUNDC2	1.14137	1.92708e-09	1.83297e-08	0.195709	66.1829
MCM4	1.14136	1.28806e-13	1.80546e-12	0.157092	104.577
PIK3CD	1.14092	4.82988e-16	7.92569e-15	0.142792	241.692
PPFIA1	1.13955	1.97609e-20	4.35359e-19	0.124514	263.778
SETD2	1.13923	1.31855e-33	5.49818e-32	0.0949268	502.117
LOC103237779	1.13879	1.55012e-11	1.80903e-10	0.172853	109.992
OTUD4	1.13851	3.12606e-23	8.03014e-22	0.115694	300.141
WDR7	1.13805	9.17528e-14	1.29804e-12	0.155736	130.931
PDLIM1	1.13791	0.000394719	0.00162295	0.353762	26.6815
HNRNPD	1.13745	4.8292e-28	1.59495e-26	0.104427	312.434
GNL2	1.13742	1.18352e-11	1.40362e-10	0.171469	102.569
PAK2	1.13674	6.66726e-20	1.41265e-18	0.126042	250.551
URB2	1.13656	7.77719e-06	4.57759e-05	0.268995	90.4513
CDC5L	1.13418	2.58611e-20	5.67019e-19	0.124345	207.446
EIF5	1.13378	1.10017e-25	3.24613e-24	0.109232	285.696
LOC103221994	1.13344	2.7385e-06	1.73245e-05	0.254037	43.3912
GJC1	1.13315	6.37736e-11	7.05488e-10	0.17792	106.776
ITGA3	1.13111	2.86163e-38	1.42411e-36	0.0880136	824.951
PAF1	1.13099	2.23915e-17	4.05713e-16	0.135196	156.702
TTF1	1.13073	2.69044e-08	2.22043e-07	0.210286	67.9959
PAK1	1.1306	1.68924e-14	2.51444e-13	0.149993	160.239
PC	1.13004	5.90468e-18	1.11755e-16	0.132851	177.034
TXNL1	1.12975	4.14696e-09	3.78878e-08	0.198179	84.2065
RBM39	1.12934	8.44971e-19	1.67928e-17	0.128944	183.8
PRPF6	1.129	5.73383e-20	1.22197e-18	0.124962	229.973
SPTLC1	1.12881	3.13014e-17	5.64352e-16	0.135643	186.6
LOC103236378	1.12805	2.46265e-11	2.81463e-10	0.173275	76.3864
HNRNPH3	1.12795	4.12175e-22	9.99728e-21	0.117821	226.929
FBL	1.12767	1.77765e-18	3.4724e-17	0.130092	149.83
SNX3	1.12692	1.0526e-12	1.36733e-11	0.161497	118.805
LOC103224829	1.12684	3.27725e-05	0.000171753	0.289687	34.1341
GNAI1	1.1254	3.12473e-22	7.63991e-21	0.117256	217.183
RADIL	1.12413	0.00197938	0.00682361	0.413805	21.1972
CKAP2L	1.12215	0.000370835	0.00153512	0.345418	27.4746
LOC103231220	1.12159	0.00154206	0.00549225	0.399848	20.2119
SH3BP5	1.12131	1.6723e-08	1.41337e-07	0.204992	75.8337
PRDX6	1.12099	1.49356e-14	2.225e-13	0.14809	128.805
NOL12	1.12087	0.000272831	0.0011637	0.33457	28.0022
MARCKS	1.12018	1.07094e-11	1.27424e-10	0.168366	116.18
CDCA5	1.12003	0.00183961	0.00641075	0.40637	21.3442
MMD	1.11953	3.10923e-06	1.95144e-05	0.252248	58.6268
TUBB	1.11949	3.45927e-32	1.3414e-30	0.0954774	336.156
EFHD2	1.11853	2.1869e-17	3.96639e-16	0.133564	231.515
FIS1	1.11837	7.22644e-09	6.41632e-08	0.199283	68.5963
LOC103221164	1.1182	1.09281e-08	9.45477e-08	0.201866	88.2642
PHF20	1.11787	2.94013e-17	5.30619e-16	0.134097	196.238
SLC38A2	1.11782	1.94483e-19	4.00907e-18	0.12555	212.115
CCT2	1.11732	5.08506e-20	1.08751e-18	0.123451	189.893
MLLT4	1.11723	7.66315e-32	2.92192e-30	0.0958426	503.525
VCL	1.11588	2.26245e-32	8.94403e-31	0.0948317	414.615
CNOT1	1.11583	1.73181e-40	9.27561e-39	0.0842606	527.558
RIOK3	1.11581	3.89848e-14	5.64646e-13	0.150254	201.169
CTR9	1.11542	1.84397e-18	3.59426e-17	0.128902	210.4
ZNF267	1.11436	2.84503e-06	1.79611e-05	0.250019	62.2153
PTBP1	1.11395	1.5905e-25	4.67024e-24	0.107745	347.182
CHAF1B	1.11255	0.000281036	0.00119313	0.332553	25.8076
CDCA7	1.1123	0.000676443	0.00264892	0.361436	24.1009
DDX39B	1.1122	3.66936e-24	1.00325e-22	0.110771	244.141
ZFX	1.11198	4.11157e-08	3.32715e-07	0.209627	71.7982
RTN2	1.11114	2.71165e-09	2.54238e-08	0.192455	96.1318
MRPS15	1.11092	2.8636e-10	2.95318e-09	0.180645	73.2943
PDZD8	1.11022	1.06867e-20	2.38316e-19	0.12038	331.345
P4HA1	1.10894	2.49003e-15	3.94431e-14	0.142446	168.476
ZNF34	1.1075	4.25435e-05	0.000217895	0.289978	53.9922
E2F1	1.10586	0.000698205	0.00271956	0.359367	20.2574
CUL3	1.1055	3.45267e-21	7.95202e-20	0.118247	245.143
CAMSAP2	1.10535	3.04377e-15	4.76362e-14	0.142853	216.163
MKL1	1.10473	3.80073e-18	7.29933e-17	0.128224	283.285
INHBA	1.10467	1.16695e-14	1.74985e-13	0.145508	242.513
LOC103227448	1.10448	0.000479129	0.00193431	0.346411	19.831
PSMA7	1.10441	1.59036e-09	1.53118e-08	0.188171	71.7529
LOC103245926	1.10438	0.00123054	0.00451082	0.3809	19.0632
EEF1A1	1.10428	1.00265e-31	3.79924e-30	0.0949131	346.142
AQR	1.10386	1.22701e-19	2.56996e-18	0.123194	201.857
IFFO2	1.10262	3.58321e-12	4.45195e-11	0.161986	127.571
LOC103246651	1.10061	9.40143e-11	1.02451e-09	0.174341	100.955
PTPN14	1.10051	4.75814e-39	2.44796e-37	0.0847057	1030.6
PFDN4	1.10016	6.16131e-05	0.000305043	0.293134	27.2505
RNF145	1.10004	1.09959e-16	1.90179e-15	0.134461	186.799
CD151	1.09889	3.054e-20	6.62451e-19	0.120626	196.841
SAMD4A	1.09847	1.31488e-19	2.74457e-18	0.122749	305.405
OLFML2B	1.0984	2.30702e-05	0.000124786	0.275144	33.7513
ZBTB49	1.0984	0.000826895	0.0031648	0.363571	35.6632
ZSWIM4	1.09797	6.25478e-10	6.25615e-09	0.182252	118.649
CDCA2	1.09738	4.58017e-05	0.000232497	0.287145	42.2668
CALR	1.09671	1.42949e-36	6.6944e-35	0.0873854	395.794
PRKAR2B	1.09552	1.67881e-05	9.31404e-05	0.269024	38.8891
ABCF1	1.09512	6.43415e-26	1.92645e-24	0.104896	296.233
IRF2BPL	1.09472	3.92612e-12	4.86147e-11	0.16097	140.656
RAB3GAP2	1.09342	2.05839e-14	3.04161e-13	0.145447	188.901
LANCL2	1.09322	3.33623e-09	3.08834e-08	0.190084	79.2166
RPL37A	1.09242	1.82483e-09	1.74222e-08	0.186654	66.302
FDPS	1.09191	2.52451e-07	1.86038e-06	0.220129	54.2436
KANSL2	1.09163	6.62794e-11	7.32321e-10	0.171277	93.5685
SOX6	1.09137	1.08547e-25	3.20794e-24	0.105019	284.364
BCL2L11	1.09111	0.00206497	0.00708122	0.39836	17.8809
YAF2	1.08944	4.23564e-05	0.000216998	0.282874	39.6571
TGM4	1.08809	3.2016e-05	0.000168416	0.277653	31.7951
CDC27	1.08636	3.10534e-18	5.97638e-17	0.126386	224.709
PIBF1	1.0855	4.31305e-06	2.64874e-05	0.247782	50.6012
USP1	1.08491	1.04229e-09	1.01963e-08	0.181749	98.1279
TOP3B	1.08464	7.655e-09	6.76723e-08	0.193763	83.5218
ZYX	1.08416	4.1053e-18	7.843e-17	0.126581	247.113
PPP6R3	1.08392	1.16488e-23	3.07005e-22	0.109137	270.954
LOC103236499	1.08366	4.85116e-08	3.87923e-07	0.205468	60.4314
GPX4	1.08353	2.80068e-20	6.11132e-19	0.118582	187.367
RAB20	1.08315	4.38586e-05	0.000223815	0.283641	43.1651
CDC42EP3	1.08249	9.2834e-11	1.01225e-09	0.171016	178.723
SNRPB	1.0823	9.94413e-10	9.73831e-09	0.181787	81.5162
PSMD14	1.08204	2.53108e-07	1.86252e-06	0.217864	52.3805
CDK16	1.08185	4.41488e-12	5.43352e-11	0.159472	109.061
LOC103233412	1.0815	8.30892e-13	1.09333e-11	0.153891	104.259
MYOF	1.0802	7.33358e-33	2.94375e-31	0.0910661	437.97
FTL	1.08011	6.97606e-23	1.76714e-21	0.110831	290.032
B3GNT2	1.07961	4.26837e-05	0.000218491	0.279664	46.028
PSME1	1.0786	4.21569e-13	5.66977e-12	0.151642	104.058
ELL	1.07819	1.17758e-12	1.52103e-11	0.154627	164.969
CHCHD10	1.07744	1.84759e-13	2.57002e-12	0.148913	113.479
NFE2L3	1.07699	6.99788e-07	4.80305e-06	0.225442	53.9699
TALDO1	1.0769	8.36647e-12	1.0053e-10	0.160848	107.302
KIF22	1.07645	1.19076e-05	6.77507e-05	0.258833	39.1726
KDM6B	1.07608	4.47175e-33	1.8069e-31	0.0903689	719.074
ATP8	1.07558	1.73668e-09	1.66503e-08	0.183531	98.6336
TRIM26	1.07476	2.56915e-12	3.22052e-11	0.156649	143.719
ST13	1.07433	9.50535e-21	2.12752e-19	0.116252	221.045
PAPOLG	1.07426	1.09583e-06	7.28851e-06	0.229426	65.5515
GNAS	1.07282	8.18636e-24	2.17319e-22	0.107628	255.042
GPC1	1.07223	2.68777e-05	0.000143452	0.27069	48.3094
LOC103223292	1.07125	1.78402e-31	6.7182e-30	0.0924283	513.776
ZNF668	1.07014	0.000304485	0.00128403	0.321483	29.5852
LOC103228547	1.07012	0.000443783	0.00180719	0.332504	28.4444
RPS15	1.06971	1.17846e-12	1.52109e-11	0.153341	106.628
MYL12B	1.06913	2.21701e-11	2.54984e-10	0.16319	94.4014
LOC103219833	1.06799	0.00255789	0.00853441	0.398343	14.4353
NLN	1.06783	1.64793e-07	1.24114e-06	0.211365	72.4411
ZC3H15	1.06743	1.16068e-12	1.50132e-11	0.152929	126.923
ANP32B	1.06646	9.10434e-17	1.58666e-15	0.130127	205.044
TRIM24	1.06598	2.28541e-29	7.9355e-28	0.0954011	370.396
S100A13	1.06538	6.32054e-08	4.98869e-07	0.203662	61.58
AP1G1	1.06466	2.18675e-20	4.81191e-19	0.116312	282.81
EIF4G1	1.06257	1.91382e-34	8.22448e-33	0.0873875	905.966
GTF3C3	1.06228	3.90349e-07	2.7773e-06	0.217563	63.1274
USP12	1.06168	2.67899e-08	2.21198e-07	0.197178	96.1195
BAIAP2	1.0615	6.16457e-09	5.52181e-08	0.187917	126.195
FOXJ3	1.0606	2.96171e-16	4.95354e-15	0.131398	258.09
HNRNPA2B1	1.06025	2.9739e-23	7.66083e-22	0.10765	273.213
SPAG5	1.05996	1.51633e-09	1.46298e-08	0.179966	82.4907
ATG101	1.05969	1.27491e-06	8.42741e-06	0.228722	77.0697
CENPV	1.05926	0.00138402	0.00498673	0.366163	21.9179
SRSF11	1.05897	1.18255e-22	2.96271e-21	0.109193	294.889
LOC103242224	1.05883	0.00170772	0.00600149	0.374746	18.6986
TUBA1B	1.05835	8.508e-12	1.02029e-10	0.158226	109.314
FBXO3	1.05827	1.75316e-06	1.13626e-05	0.230972	60.3745
C11H12orf49	1.05781	6.34669e-06	3.79803e-05	0.246075	64.1618
MED13	1.05523	4.74385e-35	2.07277e-33	0.0859548	743.29
PHF19	1.05522	5.49602e-05	0.000273737	0.277998	47.1994
ATP6	1.05503	7.20613e-25	2.02793e-23	0.103364	354.416
SRPK2	1.05465	1.28801e-12	1.65198e-11	0.151593	154.134
HOXA2	1.05464	3.74329e-05	0.000194171	0.269991	56.8424
BAZ1B	1.05442	8.8244e-37	4.1862e-35	0.0836924	756.628
EXOSC10	1.05391	9.69897e-06	5.61108e-05	0.250035	43.7191
LOC103239693	1.05384	8.17023e-06	4.79041e-05	0.247752	45.3042
NUP160	1.05368	4.13857e-09	3.78313e-08	0.183913	97.6241
SNAPC2	1.05173	7.11027e-06	4.2163e-05	0.245401	44.1428
ATG2B	1.05155	3.01542e-19	6.16727e-18	0.118613	233.888
SMC6	1.0511	9.19242e-15	1.38867e-13	0.137651	170.486
FOXM1	1.0508	1.32677e-10	1.42542e-09	0.167524	111.419
MSX1	1.05061	0.000811496	0.00310977	0.344523	38.1834
HAUS4	1.05057	1.19835e-09	1.16542e-08	0.177105	96.5559
PPRC1	1.05032	1.88085e-10	1.98108e-09	0.168519	267.061
MIS18BP1	1.0501	1.2274e-05	6.96621e-05	0.252627	45.2352
THBS1	1.04861	4.60337e-12	5.66168e-11	0.154447	183.299
EIF4B	1.04775	5.81272e-38	2.86928e-36	0.0817823	895.201
PPP6C	1.04748	5.22629e-07	3.65021e-06	0.216711	71.6737
ELMSAN1	1.04743	1.0459e-19	2.19567e-18	0.11661	310.518
OCLN	1.04697	1.83457e-09	1.7506e-08	0.178803	109.082
LOC103246839	1.04596	0.000117881	0.00054895	0.291066	44.2742
FAS	1.04522	0.000417475	0.00170959	0.321438	33.1421
SOD1	1.04485	3.2761e-09	3.0373e-08	0.181215	76.2109
FOXC1	1.04418	7.15608e-07	4.90427e-06	0.218324	87.6664
PNO1	1.04417	0.000178066	0.000794381	0.299197	33.234
MTA2	1.04358	1.77777e-11	2.06679e-10	0.158423	141.361
IGFBP3	1.04329	1.33132e-23	3.47857e-22	0.105145	257.685
LOC103224848	1.043	0.000493672	0.00198512	0.325477	29.063
POLR3C	1.04147	2.67393e-05	0.000142839	0.261634	44.3146
EIF1AD	1.04146	1.14383e-05	6.52023e-05	0.249269	49.3695
MRPS9	1.04143	7.4679e-08	5.84879e-07	0.199793	69.1786
TGS1	1.04119	1.53219e-07	1.15827e-06	0.205449	75.2432
GBF1	1.04117	6.3691e-25	1.80349e-23	0.101824	350.233
SPTY2D1	1.04111	1.50204e-12	1.9104e-11	0.149838	164.963
COG2	1.04055	5.74255e-06	3.45803e-05	0.240274	47.4558
UBA52	1.03981	7.07476e-12	8.54586e-11	0.154519	100.185
BTG2	1.03974	3.75364e-05	0.000194597	0.266972	68.7561
HMBS	1.03883	0.000121471	0.00056351	0.289068	45.4664
GAR1	1.03779	0.00012369	0.000572496	0.28831	35.6519
ADRM1	1.03733	6.12765e-11	6.78275e-10	0.162025	111.962
PPP1CB	1.03583	8.10028e-24	2.15347e-22	0.103848	261.783
LOC103221971	1.03517	0.00304169	0.00996115	0.393745	22.3784
ROR2	1.03446	1.16246e-09	1.13113e-08	0.174439	120.417
MYL6	1.03324	1.63549e-10	1.74172e-09	0.165356	102.069
SRSF1	1.03254	1.91404e-13	2.65841e-12	0.142565	148.08
ZNF823	1.03205	0.00101306	0.00379073	0.345572	34.8213
DGKD	1.03197	4.60292e-13	6.1588e-12	0.145205	163.651
PDCD5	1.03183	2.22886e-05	0.000120903	0.256533	40.9865
MARS2	1.03146	0.00253112	0.00845745	0.383221	29.5378
SPRTN	1.03085	0.000940604	0.00354722	0.34208	30.2854
CRNKL1	1.03064	1.82127e-07	1.36551e-06	0.204174	71.1988
LMNB2	1.03059	1.63364e-18	3.19794e-17	0.118731	251.365
LOC103223017	1.0305	0.0024194	0.00813026	0.380405	25.5724
EEF1D	1.03001	5.8157e-22	1.39577e-20	0.107966	254.686
SMCHD1	1.0298	1.15823e-17	2.14543e-16	0.121676	293.127
INO80D	1.02901	1.41447e-18	2.78082e-17	0.118379	275.416
TRIP4	1.02887	2.20508e-07	1.63784e-06	0.205277	66.4555
CHD5	1.02728	4.87924e-07	3.42221e-06	0.212143	84.2228
WDR61	1.0271	1.02654e-05	5.90883e-05	0.244744	46.01
RRAS2	1.02706	4.83314e-09	4.3873e-08	0.18	133.744
LOC103244341	1.02657	0.000103438	0.000486529	0.282712	55.1571
DCUN1D5	1.02654	3.24398e-05	0.0001704	0.260697	46.3837
PPP1R10	1.02625	2.21291e-22	5.46908e-21	0.106359	466.406
PPL	1.02614	1.84744e-27	5.98255e-26	0.0952257	389.885
FAM188A	1.02579	9.03345e-05	0.000430438	0.278888	43.4044
IP6K2	1.02564	7.55864e-07	5.16078e-06	0.215088	62.0977
KNTC1	1.02544	3.2787e-07	2.36688e-06	0.20806	78.8671
JAKMIP2	1.02533	7.55293e-06	4.46429e-05	0.239666	47.6886
SYNE1	1.02528	8.66882e-47	5.65455e-45	0.0716572	833.901
ANK2	1.02526	2.03738e-11	2.35064e-10	0.155767	158.838
INCENP	1.02384	1.19438e-13	1.67801e-12	0.140313	142.808
COG3	1.02305	2.86029e-06	1.8045e-05	0.228183	90.446
ATP6V1A	1.023	2.71935e-12	3.40413e-11	0.148966	156.971
HSPA13	1.02276	1.43916e-07	1.09111e-06	0.200857	72.4403
NDUFS1	1.02227	8.23547e-12	9.91514e-11	0.152474	134.288
ZNF536	1.02078	4.78981e-09	4.35013e-08	0.179567	128.87
LRP12	1.02062	1.41404e-08	1.20626e-07	0.185144	111.852
EIF4ENIF1	1.01951	6.81881e-15	1.04304e-13	0.132849	189.869
TSC1	1.0184	4.70773e-15	7.28661e-14	0.131757	291.256
PDE9A	1.01813	0.0019697	0.00679534	0.364618	22.7874
KLF3	1.01805	6.98991e-17	1.2336e-15	0.123503	254.679
STIL	1.01758	2.71967e-06	1.72293e-05	0.226263	62.2601
LGALS1	1.01678	2.68167e-12	3.35926e-11	0.147972	110.14
EEF1A2	1.01664	1.35637e-26	4.23203e-25	0.0959719	295.758
ATAD3A	1.01405	1.24817e-07	9.54632e-07	0.198291	84.4558
PUF60	1.01385	4.34084e-15	6.74732e-14	0.13101	172.525
CLCN3	1.01363	5.26276e-17	9.37746e-16	0.122446	225.954
AFF4	1.0135	2.47248e-26	7.60225e-25	0.0959416	712.317
ZNF827	1.01315	6.696e-18	1.2598e-16	0.118883	256.549
G3BP2	1.01098	4.79841e-18	9.10999e-17	0.117445	224.105
BMPR1A	1.00992	3.50403e-08	2.85576e-07	0.188449	83.0836
LOC103246030	1.00814	0.000907193	0.00343826	0.332583	33.8227
RPAIN	1.00766	7.99718e-05	0.000385791	0.270412	48.4123
UBE2Q1	1.00704	5.55527e-10	5.59017e-09	0.166235	106.439
ATF4	1.00674	1.80564e-20	3.99253e-19	0.10975	329.059
PRPF8	1.00667	1.81603e-34	7.84113e-33	0.0826836	896.203
ZNF410	1.00628	1.14262e-05	6.51538e-05	0.240059	55.6853
ZNF142	1.00509	1.38496e-08	1.18256e-07	0.182001	101.818
RNF19B	1.00385	5.50772e-06	3.3221e-05	0.230875	77.2814
MATR3	1.00374	5.90482e-24	1.59299e-22	0.100232	327.048
GNL1	1.00369	6.8187e-16	1.10995e-14	0.125783	182.165
VASP	1.00355	2.23843e-14	3.29434e-13	0.133387	205.472
STK10	1.00263	3.60537e-08	2.93181e-07	0.186958	146.651
JTB	1.00258	4.81815e-05	0.000243629	0.260532	47.7626
WDR75	1.00227	1.06676e-06	7.11746e-06	0.212767	62.2995
C11H12orf75	1.00204	9.02072e-13	1.18104e-11	0.142563	123.986
UBR1	1.00131	1.07118e-09	1.04676e-08	0.168117	102.833
MAP1B	1.00114	1.27305e-38	6.44073e-37	0.0773937	1175.36
NR1D2	1.00031	3.89865e-13	5.25497e-12	0.13919	229.493
RPL17	1.00001	1.71111e-10	1.81379e-09	0.160086	91.5301
ZNF319	-1.0005	0.000257549	0.00110523	0.288648	67.9518
IREB2	-1.00157	8.24571e-09	7.25082e-08	0.177163	222.838
EIF4E2	-1.00198	1.54343e-05	8.61263e-05	0.242183	58.9633
LRP3	-1.00282	3.93057e-05	0.000202963	0.254618	57.4758
CCDC25	-1.00367	0.000601146	0.00238009	0.311836	29.943
DGCR2	-1.00376	4.33818e-08	3.49967e-07	0.187897	145.824
OSBP	-1.0038	3.05149e-09	2.83915e-08	0.17252	144.722
MESDC2	-1.00442	4.38334e-05	0.000223771	0.255822	50.8347
EVA1B	-1.00483	0.00235347	0.00794086	0.361555	24.91
PARP4	-1.00517	2.75014e-06	1.73921e-05	0.221872	76.4335
LOC103223177	-1.00552	1.75517e-08	1.48135e-07	0.182241	133.064
TRIM25	-1.00613	6.20005e-08	4.89587e-07	0.190736	119.417
MYH14	-1.00615	5.66463e-10	5.6908e-09	0.164796	139.272
ZDHHC6	-1.00747	0.000312258	0.00131347	0.296182	37.1946
F8A1	-1.00894	0.00134529	0.00486831	0.337685	31.807
PCDH1	-1.00945	8.90795e-06	5.18797e-05	0.235827	85.5353
CHFR	-1.00964	0.00139075	0.00500504	0.338426	51.0061
NBPF8	-1.0115	0.000206305	0.000906631	0.286492	54.4715
CMAS	-1.01205	0.00245115	0.00822274	0.362744	26.1037
MPHOSPH8	-1.01205	2.50542e-05	0.000134664	0.249626	56.3213
HNF4G	-1.01278	2.29577e-10	2.39189e-09	0.162338	124.282
TMEM59	-1.0137	2.44742e-05	0.000131896	0.252439	46.6643
MYLK	-1.01431	1.1468e-14	1.72246e-13	0.133225	206.61
EDEM3	-1.01461	1.44165e-06	9.44751e-06	0.216827	96.6986
GFOD2	-1.01534	0.00157047	0.00558362	0.346454	32.7284
BBS4	-1.01544	0.00223271	0.00757396	0.360689	26.5272
MOB1A	-1.01676	0.000145337	0.000662283	0.280982	45.1214
SIK2	-1.01698	5.0801e-05	0.000255601	0.261588	76.0664
DOCK4	-1.01748	0.000761914	0.00294137	0.323218	31.9498
CTNS	-1.01765	0.00221281	0.00752043	0.360675	33.7076
PPIP5K1	-1.01882	0.00152859	0.00545277	0.346268	29.8261
TOLLIP	-1.01891	3.2982e-06	2.06084e-05	0.226069	110.766
CDC23	-1.01895	0.000410602	0.00168295	0.305935	39.8906
C4H5orf42	-1.02013	4.36207e-10	4.42851e-09	0.166211	136.5
ENKD1	-1.02054	0.00165354	0.00583693	0.351046	22.0801
ADIPOR2	-1.02084	4.36342e-06	2.67607e-05	0.229615	87.5825
C25H1orf115	-1.02147	0.000193035	0.000854689	0.289081	41.1878
EIF4EBP2	-1.02194	1.43078e-15	2.28824e-14	0.129476	245.732
ZNF146	-1.0241	1.22055e-05	6.93379e-05	0.242563	88.403
RPS6KA6	-1.02458	0.000137193	0.00062752	0.282713	40.4148
CEP170B	-1.02504	3.84493e-10	3.91656e-09	0.166608	187.709
COL4A2	-1.02595	6.37444e-09	5.70141e-08	0.180812	122.926
SH3RF3	-1.0286	0.00245427	0.00823078	0.367377	40.9472
A4GALT	-1.02957	9.37574e-13	1.22576e-11	0.146409	157.909
TAPBP	-1.02974	6.87127e-06	4.08518e-05	0.238004	63.9275
LOC103228084	-1.02986	0.00271236	0.00898904	0.376225	27.5448
AGRN	-1.03126	2.22187e-24	6.12994e-23	0.102036	801.52
AFAP1	-1.03162	7.8655e-06	4.62509e-05	0.239304	75.2142
PXYLP1	-1.03225	0.000346169	0.00144253	0.305786	37.6182
TRMT1L	-1.03334	0.000119215	0.000554082	0.282484	52.3612
UVSSA	-1.03503	0.00238916	0.00804048	0.370163	25.9576
SLC46A1	-1.03739	4.76943e-06	2.90266e-05	0.234411	70.4424
CRISPLD2	-1.03771	0.00277286	0.00917124	0.377247	29.878
LOC103221642	-1.03786	0.000104103	0.000489279	0.28093	46.6127
STYXL1	-1.03913	7.79858e-05	0.000376907	0.276798	41.3964
FAM168A	-1.03917	0.000516993	0.00206888	0.3189	35.8771
MAN2B2	-1.03989	9.00318e-05	0.000429332	0.278594	45.4948
SMAD5	-1.04379	1.62942e-05	9.05936e-05	0.251461	70.9812
SEC23IP	-1.04456	3.86066e-07	2.74897e-06	0.211698	112.719
ZNF280C	-1.04475	0.00017731	0.000791394	0.293225	65.7708
LIMD2	-1.0448	0.00121237	0.00445347	0.348772	24.4064
PARP9	-1.04573	0.0014145	0.00508651	0.354645	26.284
LOC103243239	-1.04638	2.83511e-05	0.000150744	0.26194	47.4611
RPAP1	-1.04649	1.92846e-05	0.000105674	0.255507	62.1646
PPAPDC1B	-1.04691	4.38378e-05	0.000223771	0.267562	51.234
KEAP1	-1.04774	5.26953e-05	0.000263679	0.271051	54.5197
DOCK5	-1.04813	1.10958e-16	1.91725e-15	0.127725	280.531
NDST1	-1.04874	9.3402e-12	1.11569e-10	0.156084	202.092
ZDHHC24	-1.049	0.00296482	0.00973212	0.387594	24.2491
MOB2	-1.04927	0.000486806	0.00196183	0.320514	39.6914
[truncated: 1,830 more rows]

## Sheet: B.1.1.7_vs_NonInfectedVero
gene	log2FoldChange	pvalue	padj	lfcSE	baseMean
MRC1	9.65161	6.0035e-11	6.94881e-10	2.55326	23.7077
LOC103237006	9.40134	1.74771e-10	1.91923e-09	2.53612	26.2954
LOC103246370	8.2439	4.05782e-08	3.32364e-07	2.53737	8.47144
SPATS1	8.21462	5.32703e-08	4.27773e-07	2.60986	7.74143
LOC103224727	8.17431	1.42151e-09	1.40992e-08	1.26817	31.9666
LOC103228822	8.14961	2.49899e-08	2.10504e-07	2.44794	14.7874
NLRP12	7.97543	5.0675e-08	4.08673e-07	2.45981	15.0193
LOC103225418	7.94499	6.89473e-08	5.44617e-07	2.46045	10.234
SNX31	7.88165	7.65286e-08	5.98982e-07	2.44684	11.838
RASSF10	7.8782	8.55674e-08	6.65308e-07	2.45434	11.5256
LOC103214892	7.76124	8.61713e-15	1.38513e-13	0.957437	65.5277
MYRFL	7.7247	1.56248e-07	1.17139e-06	2.44885	9.5372
LOC103214238	7.64808	5.81797e-07	4.03301e-06	2.60191	5.55834
LOC103233728	7.63474	1.92181e-07	1.42269e-06	2.43731	9.75934
LOC103235563	7.60999	1.40845e-07	1.06141e-06	2.3917	19.2682
LOC103248214	7.54095	6.02822e-07	4.16497e-06	2.56648	6.33587
LOC103240218	7.52375	4.32368e-07	3.05444e-06	2.46681	7.36115
PRR19	7.34463	1.11676e-06	7.4012e-06	2.55175	6.39568
MUC22	7.24773	9.3943e-07	6.29458e-06	2.4458	7.05623
ISM2	7.10614	2.28413e-06	1.43319e-05	2.48167	4.88676
MUC17	7.00323	1.28912e-26	3.90151e-25	0.646537	66.1481
LSMEM1	6.95249	1.89315e-07	1.40312e-06	1.26463	28.5473
LOC103243094	6.83495	4.44157e-06	2.65018e-05	2.45412	5.12157
C12H9orf173	6.82687	4.39749e-06	2.62804e-05	2.43814	7.4578
RAG1	6.72344	1.72975e-05	9.28919e-05	2.61594	3.70946
NOG	6.70765	4.20932e-06	2.52445e-05	2.3975	8.2925
NR2E1	6.69857	8.05914e-06	4.59773e-05	2.47039	5.10199
CTRC	6.5494	9.61224e-06	5.41173e-05	2.44438	4.98976
LOC103227078	6.54752	6.62691e-06	3.83166e-05	2.39095	7.11722
LOC103233729	6.5422	6.57538e-06	3.80654e-05	2.38536	7.31821
RGCC	6.52678	8.97872e-07	6.03543e-06	1.26735	28.6728
ENAM	6.51095	9.42012e-06	5.31308e-05	2.41489	6.65029
C20H1orf61	6.51061	1.42519e-05	7.79124e-05	2.47195	4.01508
LOC103241940	6.49598	1.52225e-05	8.28344e-05	2.47092	4.49626
LINGO3	6.48326	1.25097e-06	8.22994e-06	1.28525	14.1994
LOC103214240	6.45289	2.6799e-14	4.1316e-13	0.834099	22.5021
LOC103231015	6.4499	1.53849e-05	8.36452e-05	2.50381	5.02499
C20H1orf162	6.44799	2.0778e-05	0.000109709	2.49143	4.22101
ARC	6.42712	1.15605e-06	7.64282e-06	1.25867	49.4041
LOC103221684	6.42175	1.70897e-06	1.09676e-05	1.29559	11.9931
TRIM10	6.36658	1.17805e-05	6.52914e-05	2.39053	6.1773
TMEM151B	6.35547	3.0033e-29	1.04094e-27	0.562315	57.6331
STYK1	6.35476	1.52545e-05	8.29844e-05	2.41874	5.03205
LOC103241830	6.35189	1.8466e-05	9.86333e-05	2.4466	4.58893
SLC9C2	6.34809	1.34844e-05	7.4017e-05	2.39763	6.42137
SPINK4	6.3338	1.66192e-05	8.953e-05	2.42086	5.38737
LOC103214451	6.32154	2.94061e-05	0.000150789	2.50186	3.61596
SLAMF9	6.29896	2.94719e-05	0.000151044	2.48884	3.68027
LOC103221974	6.25885	3.97158e-05	0.000198737	2.51468	3.29825
LOC103246371	6.23232	5.89984e-05	0.00028436	2.57235	2.99393
LOC103222465	6.21015	6.31138e-21	1.46193e-19	0.655445	56.4532
TRIM51	6.14725	3.05085e-05	0.000155881	2.43529	4.64232
LOC103228821	6.14094	4.48057e-06	2.67007e-05	1.30286	9.89904
LOC103246921	6.12605	3.91836e-05	0.000196439	2.46452	4.01287
LOC103222331	6.12042	3.12968e-05	0.000159616	2.4246	5.33579
LOC103227183	6.10355	4.36517e-05	0.000216536	2.46985	3.7344
DSCAML1	6.07277	5.03304e-05	0.000246244	2.47787	4.21266
DGAT2	6.06709	5.99984e-05	0.00028881	2.5091	3.4333
LOC103221814	6.06433	0.000113727	0.000514719	2.65136	2.92339
LOC103234172	6.00088	4.9874e-09	4.58719e-08	1.01216	13.0081
LOC103232159	5.96416	0.000201473	0.000870284	2.72957	2.49054
ALOX5AP	5.9614	0.000207176	0.000892666	2.73571	2.50282
LOC103248215	5.92688	3.90576e-05	0.000195859	2.38077	5.84362
SEMG1	5.87983	0.000120465	0.000543391	2.58618	3.21873
UBTFL1	5.8432	9.19838e-05	0.00042676	2.48924	3.92619
LOC103240825	5.83696	7.98216e-05	0.000375628	2.45824	3.93158
LOC103232975	5.83547	9.50782e-05	0.000439387	2.4902	4.28173
ZNF469	5.81042	5.19296e-21	1.20732e-19	0.616615	50.4098
NWD1	5.8063	0.00017879	0.000781067	2.63305	3.02955
LOC103243101	5.76374	1.33454e-14	2.11096e-13	0.743846	47.145
LOC103246669	5.76026	0.000260548	0.00109608	2.70312	2.46538
CMYA5	5.75708	7.22228e-27	2.22147e-25	0.535207	52.8578
CPNE5	5.75256	1.8293e-05	9.78482e-05	1.33294	7.7651
SOWAHB	5.74416	0.000263579	0.00110686	2.69671	2.71913
LOC103221953	5.73486	1.80548e-08	1.55161e-07	1.00897	12.591
SDR16C5	5.73151	0.00018382	0.00080137	2.58113	2.93849
LOC103244542	5.71297	0.000218019	0.000935112	2.61544	2.57704
LOC103214891	5.71086	5.10293e-05	0.000249199	2.33909	11.4157
LOC103243087	5.70831	1.36673e-08	1.19305e-07	0.986256	28.2128
LOC103233846	5.69906	5.86294e-05	0.000282943	2.35911	9.35715
DNAI2	5.69763	2.03577e-08	1.73528e-07	1.00359	14.5829
LOC103248210	5.69607	0.000319359	0.00131618	2.72353	2.51767
TOX2	5.66268	0.000367129	0.00148865	2.74627	2.52381
BHLHE41	5.65342	1.81284e-08	1.55651e-07	0.986441	29.0101
AVPR2	5.63404	0.000292468	0.00121464	2.65171	2.46075
LOC103218856	5.63005	0.00010231	0.000469129	2.41924	4.40476
PLVAP	5.62118	0.000113191	0.000512418	2.43862	4.26322
LOC103230848	5.61995	0.000103392	0.000473284	2.41522	4.85776
LOC103229306	5.60908	0.000117651	0.000531459	2.4374	4.10344
FER1L6	5.59747	2.52177e-05	0.000130842	1.32114	8.41928
MMP25	5.59595	2.57755e-08	2.16384e-07	0.990943	24.9506
TSGA10IP	5.58173	2.95719e-05	0.000151474	1.33813	6.70626
LRRIQ4	5.57311	3.03023e-05	0.000154922	1.33879	6.7809
COL5A3	5.56699	0.000174834	0.000765204	2.50303	3.2868
LOC103226458	5.56676	0.000158907	0.000701193	2.47963	3.435
TACSTD2	5.52377	1.12417e-07	8.60935e-07	1.04318	8.83164
FAM69C	5.5214	0.000207881	0.000894884	2.51866	3.17666
LOC103224732	5.49365	0.000417755	0.00166667	2.71079	2.89147
LOC103243796	5.4919	4.13655e-05	0.000206062	1.34879	6.64695
SLC39A4	5.49183	0.000242575	0.00103013	2.54016	2.99869
LOC103236025	5.48603	6.68128e-08	5.29754e-07	1.0095	14.5059
GUCY2C	5.47915	7.7909e-08	6.0928e-07	1.01563	14.7688
LOC103217579	5.47864	1.26653e-07	9.62533e-07	1.03837	9.82332
TNFAIP3	5.46825	0	0	0.133932	1083.76
MAP6	5.45682	2.04867e-10	2.23281e-09	0.858137	14.1
LOC103245194	5.45135	0.000421052	0.001677	2.68697	2.64662
LCK	5.44394	0.000460153	0.00181586	2.71219	2.39901
GAST	5.40057	4.99803e-05	0.000244955	1.34141	7.67423
NR4A3	5.39451	6.64658e-21	1.5358e-19	0.575741	50.7205
ASIP	5.39221	1.75192e-10	1.92273e-09	0.841634	26.9872
TRIM69	5.38842	0.000434201	0.00172319	2.65293	2.50723
LOC103236414	5.37393	4.69393e-31	1.74564e-29	0.463938	70.077
NEUROG2	5.37324	0.00023715	0.00101096	2.51132	4.0535
MYO3B	5.37227	0.000417472	0.00166591	2.62919	2.6525
TMEM236	5.36993	6.36379e-05	0.000304879	1.37242	5.45896
NAALAD2	5.36736	3.23148e-18	6.48187e-17	0.616383	51.8813
LOC103234482	5.35595	6.38413e-05	0.00030567	1.36684	6.50169
SLCO5A1	5.34668	2.26046e-10	2.4608e-09	0.839606	33.2632
MYH15	5.33965	3.09887e-07	2.23952e-06	1.05233	9.06063
LOC103239253	5.32179	0.000186195	0.000810598	2.40551	4.65691
LOC103216821	5.31855	0.000523171	0.00204105	2.67422	2.32784
LOC103246776	5.29507	7.33392e-10	7.5347e-09	0.86418	15.7026
IGFBP1	5.29309	0.000830972	0.00307035	2.84843	2.08245
TSPEAR	5.29182	0.000244467	0.00103652	2.45656	3.88861
FAM166A	5.29065	9.07077e-15	1.45557e-13	0.684243	25.5177
SCRT1	5.28565	4.47131e-27	1.38434e-25	0.492155	50.9297
COPZ2	5.27695	7.96263e-05	0.000374964	1.36554	6.27742
LOC103237953	5.25139	2.48794e-12	3.27356e-11	0.751755	24.1297
LOC103237323	5.24789	0.000797622	0.00296105	2.80542	2.36561
GTF2A1L	5.24432	0.000707761	0.00266897	2.74795	2.25472
LOC103243398	5.24375	0.000106964	0.000487502	1.40823	5.85221
CCDC168	5.2231	1.94442e-63	2.13265e-61	0.310909	129.504
ALOXE3	5.21613	3.2311e-48	2.13763e-46	0.357832	137.735
LOC103223431	5.21042	0.000329181	0.00135311	2.4862	3.37499
ADAM30	5.20759	0.000331724	0.00136208	2.48653	3.27935
WFIKKN2	5.20099	1.57078e-09	1.54336e-08	0.867147	14.2996
LOC103238753	5.19225	0.00038658	0.00155914	2.52349	3.09505
SLC44A4	5.19185	1.34499e-41	7.14359e-40	0.385743	54.3793
LOC103242748	5.18291	8.59212e-05	0.000401299	1.33804	7.99838
LOC103219960	5.17843	6.57394e-12	8.28e-11	0.758188	20.0881
BSX	5.1752	8.03786e-07	5.43788e-06	1.07511	7.61452
HENMT1	5.17248	0.000428935	0.00170408	2.54376	3.05234
LOC103242608	5.16884	9.42646e-05	0.000436055	1.35253	6.74229
LOC103241837	5.14044	0.000497903	0.00195298	2.57367	2.76008
METTL21C	5.12717	0.000514271	0.00201049	2.57576	2.55862
RAD51AP2	5.09278	0.000512409	0.00200445	2.5512	3.53592
EVPL	5.08537	1.24292e-77	2.07391e-75	0.273217	128.459
FRMD1	5.08242	0.000270575	0.0011327	2.41209	9.7755
ANGPTL4	5.081	9.59652e-07	6.4164e-06	1.05319	8.69215
RASGEF1B	5.07208	9.97158e-05	0.000459034	1.31548	11.7043
LOC103229717	5.06681	0.0015167	0.00524818	3.02666	1.81205
MYH3	5.0608	1.37734e-06	8.99544e-06	1.0759	7.01195
TRPV2	5.05879	1.20737e-06	7.96532e-06	1.06556	7.91062
KLK4	5.049	0.00063593	0.00243214	2.60156	2.69213
LOC103239442	5.04788	2.24374e-09	2.14859e-08	0.847252	31.3594
LOC103227616	5.04259	0.000147003	0.000651714	1.37423	6.00477
LOC103246720	5.0311	0.000144679	0.000642318	1.37209	6.5361
PTPRQ	5.01564	0.000171385	0.000751328	1.39246	5.09615
TRIM15	5.00802	0.000189984	0.000824971	1.41004	4.93988
TOX3	5.0067	0.00101845	0.00369853	2.77454	2.25141
LOC103215046	4.98718	0.000286655	0.0011926	2.35172	9.19941
LOC103239186	4.98114	0.000218158	0.000935496	1.42628	5.0795
RSPO2	4.97708	0.000268507	0.0011253	1.47281	4.18527
FAM71A	4.96825	2.15007e-50	1.5298e-48	0.333895	84.9766
TMEM119	4.96049	0.000335376	0.00137587	2.37662	6.11064
IRF8	4.93602	0.000143122	0.000636754	1.31985	12.1302
PRDM1	4.93568	2.9002e-06	1.78412e-05	1.09306	9.79969
ANKRD1	4.91648	2.21917e-64	2.50554e-62	0.290705	165.828
ANO1	4.9013	0.000265818	0.00111502	1.42905	4.93085
RTP2	4.8997	0.000210833	0.000906763	1.38092	5.71382
LOC103227311	4.89398	0.00137714	0.004821	2.85881	2.15792
C17H6orf25	4.88368	3.01989e-06	1.8481e-05	1.08092	8.12123
NFKBID	4.88281	1.39185e-12	1.88395e-11	0.698725	30.6503
LOC103221999	4.87893	0.000482464	0.00189755	2.43341	3.96921
TEX26	4.8497	0.000281485	0.00117394	1.42924	4.54395
FGF9	4.8433	0.000593567	0.00229151	2.48157	3.75689
DDX60	4.83809	0.000597979	0.00230665	2.47912	3.6841
LOC103245444	4.83797	0.00126512	0.00446942	2.78759	2.40183
LOC103244310	4.82964	0.000620313	0.00238159	2.48787	3.3965
ADAM32	4.79393	4.60204e-08	3.73371e-07	0.899199	10.8623
LOC103236393	4.78482	0.000714646	0.00269277	2.50952	3.19744
LOC103224014	4.77514	5.34016e-10	5.57832e-09	0.782882	14.685
NLRP11	4.7634	0.00195238	0.00654439	3.00654	1.87424
LOC103237286	4.76232	0.00162073	0.00554701	2.89052	2.0369
KIF17	4.7596	4.21706e-15	6.92619e-14	0.616431	24.096
LOC103223596	4.75434	0.000260024	0.00109476	1.35937	8.1736
LOC103222275	4.7475	0.000311554	0.00128598	1.39297	6.10529
SLC17A8	4.74046	0.000335732	0.00137704	1.40757	5.56213
LOC103235535	4.73445	0.00032934	0.00135347	1.39868	5.22179
FAM179A	4.71506	1.06339e-14	1.69917e-13	0.61945	18.6256
LOC103222518	4.7121	0.000405889	0.00162865	1.43905	4.38133
LOC103222895	4.70894	0.000352132	0.00143493	1.40884	5.36948
LOC103227124	4.6999	0.00172048	0.00585025	2.87879	2.16209
TRIM40	4.69359	0.00214327	0.00710216	3.02336	1.90812
SOCS2	4.67333	6.76638e-10	6.98686e-09	0.769304	24.7424
KIAA0319	4.67218	3.03865e-26	9.03687e-25	0.445035	35.6935
LOC103243062	4.6621	0.000470998	0.00185478	1.46024	4.41422
OTP	4.65513	0.000520898	0.00203344	1.48953	3.98282
LOC103246057	4.64816	4.2302e-06	2.53529e-05	1.03723	13.5828
TNNT2	4.64494	5.50273e-09	5.0366e-08	0.821526	10.2975
PHEX	4.6402	7.52813e-06	4.31962e-05	1.07651	8.34839
ACTBL2	4.63806	0.00117825	0.00420279	2.62898	2.59754
LOC103243446	4.63464	6.17429e-06	3.58977e-05	1.06122	9.08539
LOC103245171	4.62672	0.000658833	0.00250399	1.52485	3.27369
LOC103221862	4.62628	0.00291049	0.00924171	3.75002	8.30403
BOLL	4.62247	2.43294e-07	1.78148e-06	0.933292	7.55604
CNGA1	4.614	0.00158159	0.00543582	2.76451	2.3865
PLA2G12B	4.61353	0.0012541	0.00443393	2.64069	2.70328
LOC103227481	4.61287	1.11846e-05	6.22634e-05	1.10617	5.8031
LOC103216249	4.60665	0.00133657	0.00469468	2.67575	2.26305
HRASLS5	4.60492	8.65569e-06	4.90394e-05	1.08401	7.98391
LBH	4.5934	0.000418015	0.00166667	1.38315	6.20565
LOC103244502	4.59199	5.74713e-19	1.21075e-17	0.523178	25.7473
LOC103237788	4.5908	0.00142789	0.00498111	2.70493	2.63287
LOC103243924	4.57185	0.0026769	0.0086014	3.13667	1.75182
LOC103231437	4.56202	0.00146093	0.00508038	2.69187	2.24858
ABCB4	4.55417	1.46867e-39	7.32589e-38	0.348063	52.1813
C7H4orf32	4.55368	0.00148351	0.00514846	2.70481	2.79926
DDN	4.55244	0.000492024	0.00193314	1.40995	5.71564
LOC103237761	4.54813	0.000571449	0.00221268	1.44304	5.43839
THEGL	4.54588	0.00152984	0.00528425	2.71205	2.40492
LOC103235255	4.53978	9.33518e-06	5.26991e-05	1.06637	10.3598
CRTAM	4.53271	0.000585332	0.00226296	1.45115	4.49139
LOC103226752	4.5118	2.19847e-07	1.61607e-06	0.8996	12.4422
GRIK3	4.50818	1.8691e-22	4.68642e-21	0.466976	51.8922
CXCL8	4.49296	1.88431e-05	0.00010042	1.12186	6.1809
RAB44	4.49275	3.05654e-07	2.21318e-06	0.911698	10.9924
TUSC5	4.49127	0.000693097	0.00262364	1.47766	4.21267
LOC103236975	4.47698	2.76617e-05	0.000142503	1.14296	6.69852
MC2R	4.47521	0.00186024	0.00627121	2.78494	2.01325
LY6G6F	4.46949	3.27455e-05	0.000166509	1.15852	5.03661
DUSP8	4.46685	9.67711e-134	5.52915e-131	0.18184	302.228
LOC103237790	4.45199	0.000810846	0.00300482	1.50306	3.64094
DACT1	4.43799	1.24276e-29	4.36356e-28	0.396201	51.1404
LOC103238149	4.43192	0.00193633	0.00649982	2.77431	2.13448
LOC103214890	4.40564	0.000956145	0.00349247	2.41896	5.30423
SLC8A3	4.38494	0.00107411	0.00387854	1.56255	3.25936
CD300A	4.38361	1.23134e-11	1.51151e-10	0.66196	22.8483
CXCL1	4.3809	0.000753741	0.00282213	1.42831	5.02521
LOC103241697	4.37606	8.48072e-10	8.63412e-09	0.734805	13.1687
CILP	4.37526	2.87837e-05	0.000148041	1.12418	6.12651
LOC103221728	4.36761	0.00266157	0.00855944	2.96323	1.95585
RNF165	4.35972	4.76455e-05	0.000234435	1.162	4.89738
LOC103229711	4.35569	0.00118625	0.00422667	1.58429	3.51745
DCLK3	4.35404	4.81858e-08	3.89766e-07	0.831718	9.21506
GOLGA6B	4.35101	1.18815e-16	2.17501e-15	0.533763	25.6641
ACHE	4.34869	5.77696e-14	8.68616e-13	0.592575	35.8506
LOC103236463	4.34245	4.31192e-08	3.51649e-07	0.829912	11.3269
IRF4	4.34177	0.000892778	0.00328199	1.45437	5.05835
LOC103249049	4.34125	0.00244781	0.00797124	2.90011	1.83853
DLGAP3	4.34113	3.26107e-08	2.69919e-07	0.817888	10.791
NACAD	4.3408	2.18719e-11	2.62671e-10	0.664576	18.7707
LOC103246909	4.33499	0.000931104	0.00340755	1.46535	4.66741
KPNA7	4.33452	0.000919551	0.0033699	1.47341	4.34946
RFPL4A	4.33255	0.000894115	0.00328562	1.45017	5.69172
HSPA1L	4.3291	2.04145e-38	9.76944e-37	0.336073	103.597
RFTN2	4.32723	0.000899784	0.00330324	1.46084	5.24724
CLCA2	4.3268	0.00174868	0.00593329	1.69559	2.6856
LOC103217576	4.32167	0.00188027	0.00633647	1.7268	2.48315
OVGP1	4.31904	1.59002e-06	1.0267e-05	0.952445	7.90865
CLDN19	4.31827	9.92139e-07	6.62422e-06	0.927244	8.78662
LOC103228087	4.31224	1.3188e-06	8.643e-06	0.942093	7.77411
BTLA	4.31138	0.00297004	0.00941019	3.03389	1.88909
FHDC1	4.30901	1.1896e-09	1.18802e-08	0.731897	15.3924
RND1	4.29865	3.88874e-14	5.92743e-13	0.579225	31.1319
RORB	4.29665	0.00261403	0.00842665	2.94071	2.10279
CDH4	4.28266	0.00272163	0.00872727	2.96511	1.99727
ZNF432	4.27261	3.83441e-05	0.000192486	1.11309	6.13669
BACH2	4.27051	2.20399e-39	1.08786e-37	0.32764	84.9665
CDK5R1	4.26841	3.21576e-53	2.44488e-51	0.279646	84.6333
ZNF287	4.251	1.42186e-07	1.07023e-06	0.853196	7.77092
GRM8	4.24509	0.00126914	0.00448121	1.53893	3.79361
HES7	4.24165	6.76528e-26	1.97766e-24	0.408034	62.7202
CFP	4.23528	4.95483e-05	0.000242973	1.13452	6.18366
LOC103233464	4.23403	1.94793e-12	2.5993e-11	0.615424	36.3313
HBEGF	4.22758	1.25344e-122	5.49618e-120	0.179961	232.756
CNN1	4.22692	2.11856e-06	1.33761e-05	0.940811	12.1926
HOXA13	4.22567	5.88148e-05	0.000283692	1.15213	5.53191
PDE4C	4.22151	0.000739475	0.00277413	1.80611	12.8378
HSPA1B	4.22042	1.08447e-60	1.07619e-58	0.25786	160.281
LOC103236881	4.21637	0.00212224	0.00704361	2.69216	2.84034
LOC103215795	4.21189	1.56229e-09	1.53582e-08	0.718358	22.6955
LOC103245434	4.21169	0.00175044	0.00593822	2.57892	2.93823
LOC103222016	4.20248	7.27473e-08	5.71783e-07	0.81558	15.7059
OTOGL	4.20074	4.05264e-09	3.75861e-08	0.739862	14.2004
LOC103223112	4.19341	0.00178827	0.00604912	2.58055	3.7146
FRMD3	4.18982	3.16549e-06	1.93407e-05	0.963658	7.1773
DSPP	4.18831	0.00101242	0.00367947	1.40675	7.11183
LOC103220451	4.17812	1.25351e-08	1.10237e-07	0.769709	10.1257
LOC103230215	4.16908	0.0011876	0.00423052	1.44922	6.01066
LOC103219293	4.16042	0.000119338	0.000538695	1.21264	5.03403
LOC103235010	4.15167	2.64083e-06	1.63747e-05	0.934346	9.40001
SIX4	4.14966	2.20029e-22	5.48763e-21	0.4319	55.2196
ADRB1	4.14629	2.41632e-06	1.5091e-05	0.927443	12.5013
LOC103235510	4.141	0.00198433	0.00663377	1.64945	2.8092
SHISA2	4.13585	1.63696e-07	1.22528e-06	0.830827	11.6734
ARRDC4	4.1357	7.33616e-37	3.33309e-35	0.328731	72.3019
GJD4	4.13444	3.37975e-06	2.05897e-05	0.948337	8.38763
TIMD4	4.13359	0.00213321	0.00707631	2.64617	2.61506
ATP1B2	4.13229	0.00125313	0.0044313	1.45073	4.84179
COL23A1	4.13058	0.00126533	0.00446942	1.45372	4.6222
C6H19orf35	4.12426	2.20744e-16	3.96771e-15	0.512807	26.417
LOC103241374	4.11955	0.00195543	0.00655343	1.63967	3.04694
LOC103232626	4.11925	1.17018e-08	1.03545e-07	0.756108	11.4355
FAM186B	4.11923	6.30777e-11	7.27864e-10	0.652168	14.9838
LOC103245068	4.11187	0.00210512	0.00699418	2.61409	3.42333
FEZ1	4.10989	2.30001e-08	1.9447e-07	0.773287	9.24873
LOC103235307	4.10959	1.15285e-27	3.67178e-26	0.381192	44.8688
LOC103235306	4.10864	8.99703e-05	0.000418345	1.14571	6.56576
LOC103235014	4.10556	0.000103225	0.000472633	1.16303	5.17052
LOC103221992	4.10143	0.00228506	0.00749692	2.67096	2.5277
IL18RAP	4.09486	5.73169e-06	3.35312e-05	0.975178	8.00304
PER1	4.0904	4.55085e-183	6.60049e-180	0.142125	566.928
MAPK4	4.08122	0.000131305	0.000588345	1.19284	4.29646
LOC103225836	4.07838	7.78934e-11	8.90649e-10	0.647376	17.5681
LOC103237279	4.06665	0.00179574	0.00606896	1.53709	3.40852
ANKRD35	4.05421	5.80244e-08	4.63385e-07	0.78996	11.209
THEMIS	4.05155	0.00303945	0.00959145	1.7889	2.31495
LOC103237004	4.05015	2.2269e-62	2.33267e-60	0.244193	117.918
LOC103241267	4.04838	0.00298333	0.00944714	2.82309	2.40968
LOC103241812	4.0453	2.32915e-56	1.96055e-54	0.257287	124.224
LOC103243082	4.03417	4.36992e-07	3.08425e-06	0.848453	9.00256
EREG	4.02971	6.04026e-05	0.000290682	1.07453	13.9012
LOC103236357	4.02669	6.30789e-06	3.65955e-05	0.956848	8.10236
GALR2	4.0236	1.01244e-10	1.14378e-09	0.643886	17.8892
ALB	4.02249	0.00220505	0.00727237	1.60154	3.10006
FAM46C	4.02054	2.46236e-14	3.80868e-13	0.539951	24.8388
LOC103215366	4.01907	0.00262874	0.00846683	2.7101	2.56819
MCHR1	4.01493	7.32192e-05	0.000346436	1.09069	10.4086
GPR142	4.01307	8.42675e-05	0.000394553	1.10447	10.3778
ATAD3C	4.00605	1.22352e-06	8.06625e-06	0.888796	8.3455
LOC103230317	3.99776	1.42348e-05	7.78412e-05	1.0034	5.6021
LOC103244361	3.9969	0.000322385	0.00132807	1.30422	3.33232
LOC103235886	3.99444	0.00208211	0.00692838	1.56934	3.41737
ACTRT3	3.99098	7.22986e-06	4.15987e-05	0.962005	8.42411
GRASP	3.98744	2.39736e-14	3.71729e-13	0.536608	24.2515
IL11	3.98606	3.67619e-236	1.38629e-232	0.121555	487.123
LOC103223601	3.9764	0.000134442	0.00060083	1.15594	5.89621
MCF2	3.96732	2.4968e-05	0.000129689	1.04563	4.92554
DKK1	3.94762	0.00169642	0.00577992	1.43578	6.3235
PLCL1	3.94541	0.00165385	0.00564915	1.42055	7.6987
CX3CR1	3.9453	0.00165216	0.0056444	1.43166	7.46094
UNC80	3.93732	1.32846e-08	1.16232e-07	0.729661	10.1191
CHST11	3.93162	1.28331e-21	3.07067e-20	0.419407	38.6653
LOC103217577	3.91369	0.0027853	0.00890417	1.67476	2.84954
MFSD2A	3.90927	3.13224e-27	9.76171e-26	0.366451	49.8935
LOC103220473	3.90239	5.30404e-09	4.86183e-08	0.696082	18.4979
ALDH8A1	3.89558	3.81658e-06	2.31017e-05	0.925987	6.2213
SLC5A5	3.89528	0.000223192	0.000955343	1.20402	4.74863
KLF1	3.89456	0.00316309	0.00993835	1.69908	2.92878
TM4SF18	3.88433	0.0029372	0.00931711	1.67907	2.73961
LOC103231510	3.88158	4.44962e-14	6.76049e-13	0.529558	23.1697
TBX21	3.86218	2.45692e-05	0.0001279	1.01405	5.34513
APLNR	3.85007	1.73237e-07	1.29259e-06	0.782242	14.0412
HSPH1	3.84994	1.28037e-253	6.03534e-250	0.113353	862.707
ANKRD30A	3.84751	0.000141538	0.000630004	1.10983	9.31944
CDH15	3.83788	0.00237471	0.00775729	1.51362	4.04048
ETS2	3.83624	1.45136e-64	1.67361e-62	0.227371	149.729
KCNE1L	3.82406	3.50978e-06	2.13543e-05	0.893987	9.33414
LOC103222291	3.82379	0.0024987	0.00810617	1.52783	3.79682
FGF18	3.81827	3.18146e-11	3.77273e-10	0.598294	13.8907
TFR2	3.81751	4.79892e-06	2.84988e-05	0.914263	5.89968
CTGF	3.81046	5.96376e-38	2.81821e-36	0.298835	77.7398
LOC103226718	3.80728	0.00022122	0.000947547	1.15886	5.65737
AQP3	3.80236	0.000240034	0.00102071	1.16899	5.16584
LOC103240261	3.80142	4.75272e-12	6.09609e-11	0.571138	16.2692
CRYGN	3.80021	5.38352e-08	4.31574e-07	0.743077	8.51664
PDE4B	3.79694	0.000265561	0.00111443	1.17548	5.70299
MEFV	3.77404	2.0331e-08	1.73379e-07	0.70572	14.1135
LOC103214847	3.77402	9.03599e-16	1.56593e-14	0.479958	37.3691
FNDC7	3.76115	3.26931e-05	0.000166288	1.00125	5.95447
LOC103222484	3.76074	0.000454701	0.00179698	1.25042	4.01495
LOC103244533	3.74976	4.25944e-05	0.000211792	1.02172	5.20286
NMRK2	3.74948	0.00040627	0.00162949	1.23886	4.19534
BEST3	3.74359	3.73241e-08	3.06777e-07	0.720401	11.5306
FAM171B	3.74307	2.42011e-33	9.75025e-32	0.314663	55.5377
NFATC2	3.73823	4.7893e-11	5.5984e-10	0.590429	17.0098
DIO3	3.73397	0.000406487	0.00163001	1.23034	4.14626
LOC103229720	3.73381	5.04819e-05	0.000246846	1.03767	5.08415
MUC2	3.71929	1.81448e-08	1.55721e-07	0.701793	8.96071
MUC16	3.67945	1.45541e-13	2.11416e-12	0.514081	18.4381
LOC103238690	3.67726	0.000624225	0.00239431	1.28996	3.5225
IGFALS	3.66379	6.62838e-07	4.54796e-06	0.792343	9.56614
CDC20B	3.66323	3.40255e-05	0.000172553	0.973549	9.92892
IL12A	3.66079	5.25576e-06	3.09583e-05	0.873565	8.20623
LOC103243192	3.65871	8.29079e-06	4.71278e-05	0.898742	7.34705
GPR4	3.6568	1.3832e-06	9.03056e-06	0.819733	7.23744
GLI1	3.64735	5.43331e-07	3.78165e-06	0.782078	15.0746
ADGB	3.63851	0.000971731	0.00354459	1.36396	3.12127
PMAIP1	3.63558	3.21732e-77	5.32128e-75	0.196423	184.454
IFRD1	3.63378	3.6199e-81	6.62653e-79	0.191201	200.061
LOC103215289	3.63231	1.36758e-09	1.35858e-08	0.627521	16.2559
ARID3B	3.63226	6.96726e-46	4.26518e-44	0.257707	97.4274
MUC12	3.62845	1.4373e-12	1.93712e-11	0.533257	22.9728
CAPN11	3.62511	1.2502e-05	6.89459e-05	0.920071	5.69867
DPCR1	3.62486	1.42899e-10	1.58678e-09	0.591929	16.4003
LOC103235257	3.62449	0.000413773	0.0016529	1.18646	7.13174
LOC103215251	3.6244	7.06909e-06	4.07483e-05	0.887712	8.76134
LOC103219642	3.62128	0.000408899	0.00163655	1.17878	5.5985
ATF3	3.60174	4.47794e-136	3.01541e-133	0.145489	327.395
SOCS1	3.60042	6.1185e-12	7.74257e-11	0.542911	20.3294
LOC103229721	3.59624	5.7383e-11	6.66229e-10	0.573426	12.5253
PTPRN2	3.59565	1.05212e-11	1.30135e-10	0.550085	16.742
SLC25A25	3.59122	6.42985e-59	6.03158e-57	0.223398	134.513
IER5	3.58545	1.24839e-83	2.40187e-81	0.185879	230.458
GIMAP8	3.58522	0.000121756	0.000548555	1.07415	4.52109
LOC103235012	3.58424	0.000102837	0.000470974	1.05225	5.30828
LOC103230900	3.58024	0.000646162	0.00246428	1.24653	4.35447
LOC103243440	3.57629	8.22967e-07	5.56366e-06	0.78667	6.91805
ADAMTS4	3.56981	0.000572261	0.00221515	1.21808	4.96765
FZD8	3.56549	8.60982e-36	3.80183e-34	0.288614	83.9891
KCNE4	3.56186	3.11691e-07	2.25084e-06	0.748955	10.7096
LOC103235536	3.55916	0.000683514	0.00258996	1.24264	4.22072
NFE2	3.55427	0.00065791	0.00250098	1.24016	4.16136
INHBC	3.55013	0.00065483	0.00249179	1.23666	4.50463
CCDC81	3.54564	2.12341e-08	1.80347e-07	0.669891	14.7669
HEPHL1	3.54098	0.000652788	0.00248502	1.24239	4.19892
LOC103227170	3.53642	4.52649e-05	0.000223949	0.956227	12.288
LOC103226502	3.52512	3.59855e-10	3.82257e-09	0.590587	15.8665
MUC5AC	3.52076	2.20478e-12	2.91318e-11	0.523956	16.736
LOC103243795	3.52074	0.000865334	0.00319293	1.28799	3.73489
GEM	3.51317	2.32549e-94	5.62142e-92	0.171192	239.625
KCNA7	3.50287	7.92429e-09	7.10473e-08	0.643647	11.8386
WNT7B	3.4969	1.40511e-06	9.16727e-06	0.780988	12.8442
MYCL	3.49199	1.30672e-20	2.98644e-19	0.382646	52.0164
NLRP9	3.48704	2.91659e-05	0.00014972	0.939179	5.57689
LOC103248202	3.48688	1.6261e-06	1.04857e-05	0.785826	11.4998
KLF4	3.48315	1.7215e-18	3.51666e-17	0.405963	35.3263
LOC103240046	3.47771	2.37303e-06	1.48305e-05	0.800921	9.34553
CREB5	3.4746	2.71273e-227	7.30694e-224	0.108149	573.559
HSPA1A	3.46968	1.58821e-39	7.90124e-38	0.266399	108.953
C17H6orf10	3.46335	3.93598e-05	0.000197165	0.959203	5.12121
CCDC19	3.45352	3.89002e-13	5.4941e-12	0.492207	20.2649
LOC103225990	3.45298	7.00914e-09	6.34152e-08	0.631281	10.9047
IP6K3	3.44942	5.84243e-68	7.59718e-66	0.199028	220.16
CPLX4	3.44668	5.89119e-09	5.37649e-08	0.62747	11.4724
PRSS57	3.44572	0.000157479	0.000695379	1.05046	5.67064
FAM46B	3.44435	3.56515e-15	5.8914e-14	0.45013	48.2137
OIT3	3.44117	0.000201043	0.00086882	1.07843	4.66794
MOV10L1	3.43468	3.22807e-07	2.32399e-06	0.725769	8.47441
DNAJB1	3.43322	5.9799e-208	1.12751e-204	0.111809	739.54
GADD45B	3.43052	1.60643e-118	6.58463e-116	0.148656	330.839
TIGD3	3.42684	6.87127e-08	5.43219e-07	0.681352	13.9097
LOC103237158	3.42651	0.000110773	0.000502922	1.03633	3.85965
LOC103237435	3.42243	0.00150674	0.00522044	1.38548	2.97957
CAGE1	3.42168	0.000738504	0.0027716	1.19041	6.03569
HIVEP1	3.41217	2.00532e-254	1.26035e-250	0.100345	635.579
PNLDC1	3.40014	1.29789e-07	9.84382e-07	0.688811	17.4308
MAFA	3.39701	3.27986e-31	1.22946e-29	0.296261	64.6025
LOC103222355	3.39669	0.000412363	0.00164832	1.16148	4.3388
ATP8A2	3.39625	4.21244e-05	0.000209566	0.93757	7.96557
MATN4	3.39336	0.000812683	0.00301044	1.20389	5.44211
CEP85L	3.38848	7.37641e-71	1.04573e-68	0.191404	163.32
LOC103226859	3.38474	3.24785e-06	1.98118e-05	0.792365	12.2003
TLL2	3.37658	2.95416e-08	2.46137e-07	0.650465	9.7435
GPCPD1	3.3714	1.67086e-14	2.62534e-13	0.454629	30.0517
IGSF9	3.36743	2.37282e-17	4.5467e-16	0.408044	33.2574
GPRC5D	3.3617	3.98938e-10	4.22109e-09	0.563787	16.8534
GPR98	3.35854	7.43214e-06	4.26805e-05	0.828243	7.66798
RSPH6A	3.35703	6.89084e-07	4.71775e-06	0.736953	7.58376
LOC103229223	3.35579	0.00218931	0.00723058	1.45499	3.36843
LOC103237735	3.3551	1.51696e-10	1.68149e-09	0.548417	22.4456
COL11A2	3.35485	1.05319e-16	1.93546e-15	0.417047	25.974
ACAN	3.3518	6.26685e-08	4.98782e-07	0.661367	11.9537
ADCY10	3.35106	7.11564e-19	1.49238e-17	0.387596	39.1929
ZSWIM6	3.3478	3.21309e-104	9.93161e-102	0.154969	263.209
NEURL3	3.34588	2.57646e-09	2.45473e-08	0.590338	37.692
LOC103243869	3.34585	0.00123478	0.00437464	1.27421	4.00542
LOC103237733	3.34477	1.03365e-05	5.79009e-05	0.84378	7.37229
LOC103243143	3.34315	1.5608e-05	8.46633e-05	0.863478	7.52585
PER2	3.34137	3.61548e-117	1.45042e-114	0.145642	256.013
WDR86	3.33996	0.0011499	0.00412114	1.25656	4.13327
ISG15	3.33522	8.15851e-09	7.30778e-08	0.613283	16.5888
LOC103221942	3.33317	1.8443e-05	9.85387e-05	0.877225	7.58313
CDC42BPG	3.31958	2.83506e-09	2.68079e-08	0.590214	15.9841
RRAD	3.30665	5.37664e-08	4.31206e-07	0.652289	11.1377
LOC103243760	3.30521	3.28091e-10	3.51087e-09	0.552348	22.9363
SOST	3.30084	6.27707e-07	4.32955e-06	0.717913	14.5578
DENND2A	3.29449	0.00158781	0.00545223	1.31367	3.7473
LOC103233786	3.2914	0.000274081	0.00114433	1.06077	5.10534
SECTM1	3.28721	3.84486e-05	0.000192959	0.897356	9.13412
CCDC116	3.28188	0.00154494	0.00533222	1.30597	3.89549
LOC103243832	3.27394	6.85784e-19	1.43992e-17	0.377767	33.8595
FAM71E2	3.26921	5.30983e-05	0.0002583	0.921009	8.07317
CASQ1	3.26756	8.49403e-06	4.81814e-05	0.819745	6.28127
LOC103214226	3.26598	7.22252e-05	0.000342679	0.94046	6.41087
APOLD1	3.26543	7.23162e-05	0.000343024	0.940497	6.14538
LOC103240604	3.26539	5.93997e-05	0.000286148	0.925285	6.52228
CACNA1F	3.26443	0.00177221	0.00600232	1.33936	3.65125
AEN	3.26367	8.02946e-134	4.73111e-131	0.13297	319.763
AATK	3.25956	4.71394e-08	3.81956e-07	0.637898	13.1739
LOC103242440	3.25716	0.00206557	0.00687854	1.37104	3.6174
ITGAM	3.25688	8.28955e-07	5.59612e-06	0.721512	8.81472
HIVEP2	3.25622	1.99625e-211	4.7049e-208	0.105108	510.224
LOC103244631	3.25176	5.29594e-08	4.25821e-07	0.641398	11.6243
GCH1	3.25111	1.06291e-09	1.06887e-08	0.560592	27.3886
CNKSR1	3.25043	1.15514e-05	6.41159e-05	0.823867	8.82805
TRANK1	3.24366	2.77745e-17	5.28978e-16	0.394634	23.4675
CD79A	3.24179	3.44746e-06	2.09819e-05	0.774135	6.72412
C6H19orf26	3.23942	2.21337e-49	1.51207e-47	0.221147	109.739
LOC103243707	3.23904	0.000376429	0.00152112	1.09052	5.79714
GPR84	3.23513	0.00184705	0.00623007	1.34538	3.63979
LOC103235532	3.23315	5.82055e-13	8.09937e-12	0.466126	24.4367
LIPH	3.23086	1.91377e-17	3.68958e-16	0.390593	38.4212
C1H11orf48	3.22994	1.34984e-13	1.96383e-12	0.452364	22.82
ING1	3.22286	5.46215e-39	2.65435e-37	0.249361	77.6386
TMEFF1	3.22189	5.91107e-07	4.08853e-06	0.698419	13.1395
CSRNP1	3.22185	1.29231e-132	6.96183e-130	0.131951	386.726
MPP4	3.21696	1.88875e-05	0.000100628	0.843272	8.52383
LOC103235015	3.21548	3.80511e-14	5.80464e-13	0.440156	23.0716
LOC103245175	3.21226	1.03488e-06	6.89007e-06	0.715658	9.88935
DNAH17	3.21223	3.45167e-61	3.499e-59	0.196108	178.184
ANKRD44	3.21128	1.07108e-09	1.0765e-08	0.556278	12.8893
DUSP5	3.20689	5.7323e-63	6.07205e-61	0.192606	169.468
THBS2	3.20285	5.01608e-59	4.72891e-57	0.199109	198.948
POU2F2	3.20239	2.60155e-17	4.96982e-16	0.388844	31.4929
UNC5C	3.19826	0.00207414	0.00690588	1.36509	3.47639
SPTBN2	3.19066	3.91317e-08	3.21354e-07	0.61954	13.1989
CENPL	3.18804	7.14349e-08	5.62382e-07	0.63545	13.5217
LOC103224586	3.17543	2.73523e-07	1.99199e-06	0.669781	9.37358
PPP1R27	3.15949	0.00144397	0.0050279	1.21436	6.40667
PINLYP	3.15835	0.00265699	0.00854617	1.40918	3.07667
ISLR2	3.15496	0.000184692	0.0008048	1.00554	5.42187
DDR2	3.14957	5.17974e-52	3.86024e-50	0.208966	138.14
ATP6V1E2	3.14594	1.60046e-05	8.65403e-05	0.810748	11.8101
COLEC11	3.13347	0.000373624	0.00151011	1.04285	6.64643
LOC103223217	3.13042	0.000413628	0.00165267	1.05195	6.05071
C5AR1	3.1277	0.000403522	0.00162019	1.05243	6.32674
NETO1	3.12677	2.89597e-12	3.78403e-11	0.466157	26.1031
LOC103220375	3.12448	0.000106109	0.000484546	0.929174	7.46523
PTPRO	3.12294	0.00193219	0.00648824	1.26672	4.65751
ZC3H12A	3.12014	1.69563e-64	1.93764e-62	0.185217	164.96
CCM2L	3.11882	0.00196833	0.00658965	1.27312	4.46682
ANGPT2	3.11556	2.37263e-06	1.48305e-05	0.725611	9.95594
LOC103225886	3.1136	0.00045054	0.00178203	1.0623	6.85723
DLL4	3.10691	2.42891e-08	2.04908e-07	0.596823	16.5876
TMEM150B	3.10181	1.58634e-05	8.59493e-05	0.807117	7.04679
LOC103237789	3.10152	7.98674e-07	5.41107e-06	0.686323	11.1512
TMC7	3.10126	2.6767e-22	6.64943e-21	0.325969	54.3144
LOC103221443	3.0939	2.07399e-05	0.000109569	0.821309	6.77295
CELF6	3.08978	1.06395e-07	8.17808e-07	0.628018	13.1276
GRHL1	3.08684	2.57223e-12	3.37739e-11	0.458932	25.34
LOC103246916	3.08619	0.0022389	0.00735958	1.28925	4.91546
LOC103216965	3.07889	6.62551e-06	3.83166e-05	0.761947	8.06858
ABCA4	3.07374	1.46711e-11	1.79276e-10	0.47633	20.9985
LOC103242018	3.07125	0.000691764	0.00261912	1.10654	4.60069
LOC103243860	3.06403	0.000293842	0.00121954	1.01304	4.60818
MUC19	3.06199	3.68136e-05	0.000185594	0.850714	5.61971
LOC103243083	3.05801	0.000789601	0.00293532	1.12272	4.54529
TRAF1	3.05754	2.91757e-14	4.4894e-13	0.416124	28.9825
LOC103237241	3.05538	0.000812195	0.00300922	1.12867	4.37719
LOC103226649	3.05525	1.87389e-08	1.60455e-07	0.579945	12.3661
TCTE1	3.05394	2.75768e-31	1.0441e-29	0.26673	46.4177
FOSL1	3.05195	3.2004e-83	6.0953e-81	0.15872	211.758
HOXB9	3.05137	1.27895e-07	9.70502e-07	0.620335	22.7931
DSE	3.05008	4.53838e-19	9.59319e-18	0.350327	43.4171
LOC103226886	3.04861	1.96655e-08	1.68008e-07	0.579208	17.8669
RGS9BP	3.04394	5.50918e-07	3.83163e-06	0.658305	18.6586
ALOX12B	3.04335	0.00028258	0.00117799	1.00877	5.03539
WEE1	3.03921	2.69238e-59	2.59004e-57	0.188425	157.219
LOC103214221	3.0374	2.22522e-07	1.63382e-06	0.63388	10.6699
GP1BA	3.03529	5.67429e-08	4.53727e-07	0.60026	13.6811
TAF4B	3.02886	1.548e-49	1.06914e-47	0.206648	129.091
LOC103229724	3.01999	0.000398818	0.00160369	1.03427	4.75033
SEMA7A	3.0181	1.00439e-65	1.23776e-63	0.177577	151.418
OVOL1	3.01667	4.92238e-06	2.91952e-05	0.731979	8.08242
LOC103225105	3.01234	0.00113197	0.00405999	1.17869	3.99267
ZNF367	3.01089	3.52967e-33	1.41e-31	0.254095	93.2815
NCAN	3.00747	0.00299901	0.00949083	1.3487	3.61786
PLEKHA4	3.00204	1.757e-100	5.01943e-98	0.141731	300.921
EPHA2	3.00129	1.00109e-234	3.14593e-231	0.09195	778.034
LOC103241076	3.00106	4.20153e-05	0.000209079	0.828917	11.8932
ZBTB17	2.99804	9.12491e-92	2.00058e-89	0.14823	238.523
SERPINE1	2.99531	3.18088e-209	6.66395e-206	0.0972616	1419.13
FAM65B	2.99377	0.000132791	0.000594279	0.903603	12.4828
EOMES	2.98751	5.29573e-11	6.16745e-10	0.478286	19.1452
PDE6G	2.98578	0.00305305	0.00962792	1.36075	3.63182
ACTA1	2.97447	4.90297e-13	6.85797e-12	0.42834	27.2432
LOC103220594	2.9697	1.58228e-08	1.37293e-07	0.563734	13.6041
LOC103239249	2.96568	0.000293476	0.00121829	0.992032	5.57459
LOC103239437	2.96452	0.000101666	0.000466631	0.885495	6.22967
FAM83G	2.96376	1.82891e-87	3.66852e-85	0.150418	234.613
C12H9orf152	2.96233	0.00149509	0.00518387	1.20958	3.81993
CHRNE	2.95902	1.71435e-07	1.28016e-06	0.612499	13.1508
ANKRD31	2.95318	1.36808e-06	8.94113e-06	0.669449	10.1496
CATSPERG	2.94965	1.79909e-07	1.33814e-06	0.613796	11.3078
LOC103223633	2.94472	0.000294139	0.00122051	0.965447	6.39352
NR4A1	2.94012	2.1295e-39	1.05385e-37	0.226194	109.768
PTGER1	2.93945	2.29384e-08	1.94035e-07	0.563181	11.2212
WDR49	2.93934	0.00011666	0.000527489	0.890657	7.04142
TNFSF13	2.93769	7.65532e-15	1.23368e-13	0.390715	39.3572
KCNQ2	2.93476	0.000260431	0.00109583	0.952158	7.67886
CCNB1IP1	2.9305	3.2339e-16	5.76324e-15	0.369914	44.8827
ATP8B1	2.92751	2.14749e-33	8.68905e-32	0.246283	93.5135
LOC103226612	2.92643	0.000164562	0.000723436	0.919413	5.23392
RNF144B	2.92411	8.02612e-05	0.000377576	0.865191	5.30034
LOC103241820	2.92336	2.10975e-41	1.10806e-39	0.219347	107.306
NRIP3	2.9224	0.000343347	0.00140308	1.00768	5.45154
PPRC1	2.91924	2.14999e-112	7.94865e-110	0.130156	267.061
MYOM1	2.91561	1.09685e-08	9.7323e-08	0.544019	13.815
DDIT3	2.90891	1.03023e-74	1.60538e-72	0.160054	227.093
IPPK	2.90306	4.83243e-37	2.20618e-35	0.231106	94.4747
KIF4B	2.90216	2.21209e-05	0.000115987	0.774409	7.53327
KNCN	2.89894	0.000134869	0.000602596	0.900063	4.81001
TNR	2.89776	0.000284941	0.00118704	0.959457	4.83072
SLC5A10	2.89744	3.26317e-21	7.65262e-20	0.313453	45.013
LOC103248952	2.89329	0.000515225	0.0020138	1.02242	5.27894
JUN	2.8926	2.47275e-170	3.33026e-167	0.104304	1329.91
LOC103232992	2.88979	1.66466e-05	8.96519e-05	0.756254	8.74918
FAM46A	2.88955	4.0259e-05	0.000201082	0.799814	8.85177
LOC103222948	2.88933	0.000418129	0.00166677	0.99769	6.50884
FILIP1	2.88742	0.00124431	0.00440426	1.12314	5.06776
CARD11	2.88663	0.000557325	0.00216177	1.03054	5.01879
NFIL3	2.88271	1.05615e-65	1.2931e-63	0.169409	205.267
PLCXD2	2.87912	8.3379e-13	1.14502e-11	0.418551	34.4416
GAS2L3	2.87638	3.62269e-22	8.94055e-21	0.304072	73.7885
LOC103220123	2.87578	0.000763313	0.00285278	1.06326	4.64655
LOC103216066	2.87506	0.000317496	0.00130879	0.964886	4.68722
LOC103243519	2.87136	2.99617e-06	1.83657e-05	0.682834	7.31723
CRY1	2.86531	1.53771e-31	5.88104e-30	0.248933	86.0739
ZFAND2A	2.86403	1.93001e-23	5.07537e-22	0.292539	83.9056
LOC103221344	2.86163	0.00302815	0.00956378	1.25384	6.40106
LOC103246766	2.86157	0.000110667	0.00050256	0.854708	10.1443
TSHR	2.85751	0.000750486	0.00281208	1.05816	4.12811
KLHL33	2.85395	0.00126624	0.0044718	1.11996	4.78317
NRARP	2.85113	1.71891e-07	1.28305e-06	0.589374	19.1739
LOC103228946	2.84943	3.82859e-06	2.31595e-05	0.684026	9.05437
LOC103227315	2.84397	1.39341e-08	1.21464e-07	0.536339	15.2197
KIAA1549L	2.84339	0.000109048	0.000496045	0.85955	5.83655
LEPR	2.83959	1.62224e-29	5.65386e-28	0.255764	65.4072
NR1D1	2.8339	1.37103e-71	1.97334e-69	0.159397	259.542
DHRS2	2.83288	2.97281e-13	4.22399e-12	0.402922	39.1106
STARD13	2.83148	8.87417e-98	2.39032e-95	0.135509	298.866
PIM3	2.82953	4.63388e-90	9.81705e-88	0.141358	284.524
MYO10	2.82452	2.75436e-134	1.67527e-131	0.114865	396.26
rna-NC_008066.1:1605..1673	2.82424	0.000100359	0.000461641	0.849252	6.03709
ARHGEF15	2.82378	0.000112196	0.000508569	0.856278	6.82754
LOC103223044	2.81796	0.000126887	0.000570175	0.861785	6.8394
PLB1	2.81619	0.000201474	0.000870284	0.892669	7.4901
IL17REL	2.81001	1.81734e-08	1.55896e-07	0.536072	12.0554
LOC103235013	2.80992	0.000869618	0.00320623	1.06859	5.06994
LOC103214285	2.80985	0.00172027	0.00585025	1.16587	4.16186
RYR1	2.80835	3.2509e-19	6.92606e-18	0.321429	43.2171
MYZAP	2.80426	6.68591e-09	6.06655e-08	0.514586	22.3551
REL	2.80068	5.13657e-17	9.60814e-16	0.343609	45.2738
LOC103227366	2.80038	2.09219e-06	1.32243e-05	0.64951	10.624
LOC103232835	2.79162	1.81503e-12	2.42885e-11	0.412645	28.5636
RGS2	2.7908	1.75165e-28	5.79427e-27	0.256304	67.4541
BDKRB2	2.78935	2.64581e-07	1.9306e-06	0.586764	15.2757
LOC103222274	2.78891	5.20329e-12	6.64239e-11	0.421968	26.4648
LOC103236537	2.78884	2.70442e-05	0.000139627	0.759383	7.4811
CCRN4L	2.78549	4.09377e-39	2.00488e-37	0.215163	130.74
LOC103244816	2.78415	0.00242442	0.00790598	1.22558	4.13088
AXIN2	2.78193	1.87975e-13	2.70969e-12	0.39289	23.9135
SLC25A33	2.78166	4.58653e-16	8.06708e-15	0.352919	40.3779
PCDH12	2.7719	3.96622e-05	0.000198522	0.77128	8.32358
C1QTNF1	2.76546	0.000564512	0.00218695	0.9782	6.68071
LOC103245804	2.7648	5.17253e-05	0.000252076	0.784262	8.16309
UTP15	2.75497	2.17289e-30	7.84863e-29	0.244121	91.9701
SRRM3	2.7475	4.0785e-12	5.26648e-11	0.413217	22.8919
NFKBIA	2.74403	2.31453e-94	5.62142e-92	0.133673	319.344
IRF1	2.74218	2.87778e-80	5.11893e-78	0.145277	224.47
TNFRSF10B	2.74022	4.97318e-113	1.91366e-110	0.121741	366.017
SIK1	2.73722	1.38919e-150	1.1906e-147	0.105018	399.793
NFKBIE	2.73106	2.68463e-31	1.01849e-29	0.238394	86.145
PRX	2.72834	5.86308e-07	4.05682e-06	0.596623	10.4215
DCHS1	2.72772	2.7624e-06	1.70883e-05	0.646988	8.77237
SLC23A2	2.72658	2.61656e-44	1.50412e-42	0.197185	119.1
EGR4	2.72233	0.000518712	0.00202617	0.972535	5.81817
LOC103242526	2.72181	0.000132818	0.000594279	0.834017	7.0396
LOC103240615	2.7119	0.00283565	0.00904215	1.24703	3.43698
LOC103227244	2.71138	1.37366e-16	2.50486e-15	0.337707	29.7187
NPBWR1	2.70934	0.00291645	0.00925752	1.25659	3.48779
RRP12	2.70404	1.164e-71	1.68824e-69	0.151951	204.581
TNFRSF10D	2.69852	9.99684e-12	1.23925e-10	0.414366	28.494
TSC22D2	2.69814	4.02326e-157	4.74116e-154	0.101336	643.667
CHAC1	2.69795	1.36674e-08	1.19305e-07	0.506462	32.2793
CHST3	2.69771	3.38636e-13	4.80436e-12	0.385428	33.4253
LOC103235459	2.69744	0.000817576	0.00302678	1.0168	4.18065
VGF	2.69517	8.34366e-194	1.311e-190	0.0909929	1429.39
MARCKSL1	2.68927	8.2102e-08	6.39683e-07	0.539384	15.2953
YOD1	2.68769	5.46977e-63	5.8267e-61	0.161495	181.497
CCDC62	2.68697	3.26495e-09	3.06424e-08	0.48313	18.6275
PPM1D	2.68542	2.01406e-136	1.40648e-133	0.108411	390.745
ARHGAP31	2.68359	3.64602e-21	8.52924e-20	0.290678	51.0125
PRPH	2.68269	7.29929e-07	4.97391e-06	0.592588	9.67232
TUFT1	2.66793	2.04365e-97	5.42719e-95	0.127963	271.89
EFCAB4B	2.66451	6.9837e-05	0.000332184	0.771675	9.07609
SLC16A6	2.6645	0.00112892	0.00405211	1.04835	5.34415
HES4	2.66326	1.98652e-11	2.39641e-10	0.41444	31.5506
ACER2	2.66134	1.26897e-07	9.63609e-07	0.542651	20.3266
CDHR1	2.66037	0.00201677	0.00673269	1.11326	6.22691
FSTL4	2.65602	2.08486e-10	2.27094e-09	0.440789	19.3258
TRNAI-AAU	2.65417	6.6586e-11	7.6647e-10	0.425569	21.2162
MYO5C	2.65345	0.000406754	0.00163074	0.905328	7.1391
TNNI1	2.65232	0.000402674	0.00161747	0.916108	4.87573
HAP1	2.65115	1.13973e-06	7.54284e-06	0.599071	11.4005
NFKB2	2.64909	1.95998e-151	1.75978e-148	0.101348	506.651
LOC103220728	2.64851	0.00127014	0.00448341	1.06631	3.47217
SLC4A1	2.64436	0.00125913	0.00445004	1.06231	3.48178
STAG3	2.64209	5.53437e-06	3.24473e-05	0.64684	10.8399
TRIB3	2.63859	2.07488e-07	1.53059e-06	0.556115	64.9977
DMBT1	2.63818	0.00178999	0.00605278	1.11118	3.87865
MLC1	2.63617	0.00214469	0.00710563	1.12034	6.41636
E2F3	2.63061	1.09363e-39	5.48416e-38	0.201559	102.826
BCAS1	2.62807	8.54825e-06	4.84743e-05	0.65975	10.6706
SH2D4B	2.62676	7.06182e-07	4.82255e-06	0.580246	11.9895
EGR1	2.62671	1.09579e-198	1.87828e-195	0.0876066	1051.17
ZBTB43	2.62448	1.97766e-47	1.28582e-45	0.18321	158.908
NAV2	2.62039	1.35718e-137	1.02359e-134	0.105277	460.766
DUSP16	2.62015	3.12982e-154	3.10593e-151	0.0993506	542.109
PPARG	2.61649	4.63517e-72	6.82782e-70	0.146629	221.635
LAMC2	2.61312	0.000187948	0.000817101	0.828282	7.36273
RANGAP1	2.60894	9.04137e-122	3.87443e-119	0.111603	366.378
FGF8	2.60752	0.0020517	0.00683478	1.13077	3.93069
ABCC8	2.60317	0.000323297	0.00133154	0.881427	4.58683
TFAP2C	2.60211	1.09436e-09	1.09698e-08	0.452105	26.5462
KCNB1	2.5961	1.44655e-06	9.41804e-06	0.592595	11.9565
LOC103230837	2.59296	0.000184938	0.000805686	0.818044	9.32699
LOC103243882	2.58263	0.00306758	0.00966565	1.17456	4.71339
LOC103246082	2.58257	6.16504e-07	4.25482e-06	0.565496	16.9117
FMNL1	2.58178	8.38223e-05	0.000392565	0.762158	6.90268
CTIF	2.58025	2.78463e-64	3.10676e-62	0.153612	192.143
DNAH12	2.56615	4.79148e-08	3.87906e-07	0.504095	15.1156
LOC103221995	2.56512	1.46983e-13	2.13346e-12	0.360452	44.2628
NEDD9	2.56388	1.2807e-14	2.03092e-13	0.344564	40.1404
NOP2	2.56309	1.49821e-60	1.46366e-58	0.157335	161.508
UPP1	2.56042	6.21305e-25	1.75108e-23	0.25298	88.773
MGAT5B	2.55874	1.7669e-07	1.31611e-06	0.530554	13.232
TGM1	2.55868	0.000981175	0.00357696	0.988126	5.09457
TMEM40	2.55545	1.65558e-10	1.82549e-09	0.420457	26.1146
ACBD7	2.55456	0.00251412	0.00814515	1.15725	3.56189
LZTS1	2.55365	4.39112e-05	0.000217651	0.716179	8.11211
RAPGEF6	2.55341	2.49688e-88	5.17349e-86	0.128706	257.073
BEST1	2.54903	1.8347e-13	2.64677e-12	0.359416	45.9908
KIF5A	2.54117	0.00122944	0.00435736	1.01223	4.17314
LOC103228469	2.53484	0.00139567	0.00487775	1.01261	7.05904
INSIG1	2.53382	1.713e-35	7.4421e-34	0.206551	125.68
MILR1	2.5307	7.89269e-05	0.000371856	0.743139	6.50661
MYO15A	2.53061	0.00019967	0.000863481	0.803561	7.34884
LOC103221792	2.5297	0.00121984	0.00432896	1.00323	5.19001
COL12A1	2.52967	6.78841e-35	2.88278e-33	0.207922	132.308
PKLR	2.52427	2.9213e-05	0.000149881	0.687626	9.38392
MSX2	2.52083	0.00274788	0.00879797	1.15521	4.15753
RNASE13	2.52054	0.00184787	0.00623174	1.0509	5.48375
EPPK1	2.52033	4.93314e-09	4.54171e-08	0.457136	20.6957
LOC103233496	2.51851	4.95643e-13	6.92761e-12	0.361894	43.4436
FZD9	2.51814	0.00155028	0.00534673	1.04787	5.36204
ENC1	2.5176	2.80736e-21	6.60835e-20	0.271649	59.5744
ANXA2R	2.51708	0.00157013	0.00539938	1.03757	3.77931
CCDC125	2.51494	0.00169632	0.00577992	1.03307	5.35771
TIPARP	2.51456	1.66481e-45	9.93357e-44	0.17942	156.025
RLN3	2.5116	6.62163e-07	4.54664e-06	0.551875	13.4967
LOC103239828	2.50761	0.000180374	0.000787441	0.791124	9.27847
LOC103216957	2.50169	0.000646788	0.00246522	0.911311	6.19321
HLX	2.50126	4.55794e-19	9.62373e-18	0.287572	56.4195
DUSP4	2.49169	4.01384e-12	5.19073e-11	0.37468	35.0412
IRAK2	2.49068	7.32939e-19	1.53551e-17	0.288121	47.9321
ZBTB7C	2.48922	2.55278e-05	0.000132378	0.669875	8.77835
DUSP1	2.48748	6.10675e-112	2.17251e-109	0.111111	462.014
NOVA2	2.48643	0.000112206	0.000508569	0.750101	9.51933
HPS5	2.48596	3.86384e-40	1.96368e-38	0.189293	120.463
LOC103242966	2.48399	0.000102233	0.00046889	0.743513	9.84711
NAT16	2.48063	1.26989e-42	6.9604e-41	0.183224	127.216
DNAH2	2.48028	5.84905e-26	1.71515e-24	0.239641	71.9732
KLF5	2.47917	6.64209e-46	4.0927e-44	0.176163	151.33
MAP2K3	2.47898	8.99027e-77	1.47401e-74	0.134482	257.436
PPP1R18	2.47612	8.56478e-97	2.21218e-94	0.119105	310.35
BAG3	2.47554	4.69532e-103	1.40524e-100	0.115158	489.246
ATP1A4	2.47449	0.00263416	0.00848283	1.10424	5.44572
LOC103221002	2.47372	9.53615e-06	5.3737e-05	0.623688	12.1007
ZNF423	2.47288	0.000162393	0.0007154	0.781677	7.40201
URB2	2.4725	1.61482e-29	5.6384e-28	0.222479	90.4513
LOC103245514	2.47154	0.000410168	0.00164094	0.848588	5.67433
APLN	2.47085	2.96482e-05	0.000151824	0.674274	8.61301
C26H15orf59	2.46835	2.71606e-05	0.00014019	0.669133	11.5072
SQSTM1	2.46819	6.16372e-153	5.81085e-150	0.0939816	1087.88
KCNH2	2.46668	6.32023e-06	3.66445e-05	0.608714	13.9916
MAP7D2	2.46628	1.58704e-22	4.0005e-21	0.257641	58.5418
NHLH1	2.46041	0.00023202	0.000990122	0.791235	7.61438
KLF10	2.45958	7.85967e-74	1.18555e-71	0.13608	264.517
HSP90AA1	2.45932	1.49419e-130	7.61431e-128	0.101504	690.392
LOC103217662	2.45637	0.00229567	0.00752782	1.08236	3.6829
LOC103243121	2.45528	0.0010961	0.00394847	0.9625	4.37095
SIPA1L2	2.45443	0.00211406	0.00701894	1.05736	6.22774
LOC103216760	2.45122	1.37258e-09	1.36282e-08	0.427864	26.06
ZBTB10	2.44437	2.82944e-109	9.52664e-107	0.110526	408.904
KIAA1683	2.44407	1.08241e-41	5.78156e-40	0.182393	114.251
HMOX1	2.43347	8.47893e-43	4.68828e-41	0.179214	165.541
PTX4	2.43018	2.16121e-05	0.000113635	0.646174	9.11507
LOC103246739	2.42975	4.69494e-05	0.000231527	0.687525	9.71443
IL1RL1	2.42845	0.00267249	0.00859014	1.08726	4.39071
LOC103226170	2.42668	3.16665e-11	3.75753e-10	0.38254	24.1887
PRKAG2	2.42658	1.19805e-65	1.45737e-63	0.14274	197.647
BEGAIN	2.4261	0.000111476	0.000505747	0.732551	8.50685
DBF4	2.42345	4.0036e-21	9.35413e-20	0.262699	71.5902
XYLT1	2.42344	3.38426e-28	1.10208e-26	0.223673	94.5099
CPEB2	2.42043	2.47933e-57	2.18447e-55	0.152857	207.29
RTL1	2.4148	2.20165e-12	2.91109e-11	0.358492	21.4766
TMEM238	2.41343	4.15648e-06	2.49826e-05	0.581463	14.5708
LOC103230546	2.40998	0.000206995	0.000892087	0.767849	6.90671
LCT	2.40699	8.70656e-05	0.000406141	0.710371	8.18265
LOC103246893	2.40404	2.025e-05	0.000107153	0.636203	14.9752
HRH1	2.40395	0.000627285	0.00240395	0.865884	8.62846
SH2D5	2.40213	5.53723e-08	4.43143e-07	0.475138	22.6142
CCNL1	2.39897	2.00961e-104	6.3152e-102	0.110986	383.272
LOC103225539	2.39462	8.66674e-06	4.90872e-05	0.600271	18.5758
ZNF821	2.39228	4.95147e-24	1.34138e-22	0.241076	73.6468
EEA1	2.38894	1.18697e-122	5.32865e-120	0.101754	480.528
ZNF548	2.38795	0.00204166	0.00680493	1.03195	3.65464
BTBD19	2.38674	0.000480788	0.00189135	0.833479	5.63517
GCNT1	2.38549	0.00094058	0.00343961	0.904365	6.35247
LOC103236049	2.38442	0.00208787	0.00694422	1.01704	4.56015
LOC103218142	2.38272	0.000890988	0.00327669	0.897517	5.98197
PRKCE	2.3814	2.64127e-18	5.33775e-17	0.279862	53.2604
NGF	2.37806	2.014e-09	1.94938e-08	0.419757	24.7477
GZF1	2.37525	3.42991e-36	1.52886e-34	0.191375	127.173
INSM2	2.37442	1.6098e-05	8.69459e-05	0.619489	12.5795
EFNB3	2.37099	0.000930672	0.00340668	0.895662	5.63992
RSPO3	2.36879	7.78881e-57	6.70585e-55	0.15028	176.316
LOC103235011	2.36636	4.76168e-05	0.000234355	0.667182	10.311
HSPA6	2.36255	5.55019e-15	9.04484e-14	0.312218	66.0374
JPH1	2.35737	2.70057e-26	8.04413e-25	0.226007	91.0527
DHX37	2.35676	9.75808e-54	7.54052e-52	0.153929	169.26
MYH11	2.35666	7.37957e-07	5.02317e-06	0.518607	16.0857
RTBDN	2.35528	2.34076e-11	2.80578e-10	0.36829	24.5604
ARID3A	2.34055	8.18361e-35	3.45968e-33	0.192672	105.502
LONRF1	2.33939	3.84507e-31	1.43562e-29	0.204467	108.357
ABTB2	2.33789	8.78483e-79	1.47891e-76	0.125145	274.211
ZNF556	2.33219	0.00124963	0.00442059	0.9206	5.43559
BDNF	2.33157	4.94656e-09	4.55185e-08	0.422663	30.3233
LOC103219513	2.32657	0.000369803	0.00149692	0.784888	8.69405
KLF6	2.32117	1.98895e-129	9.61581e-127	0.0961622	471.768
FOXC2	2.32003	2.81586e-09	2.66531e-08	0.413708	22.0694
ZBTB2	2.31738	1.9177e-19	4.12295e-18	0.263683	66.4244
LOC103233820	2.31659	5.42488e-28	1.75448e-26	0.214527	91.2513
TMEM132B	2.31658	9.90912e-09	8.83806e-08	0.430436	23.5218
CDC42EP3	2.31623	5.59511e-60	5.43793e-58	0.142859	178.723
SOX2	2.3149	0.00268238	0.00861605	1.01995	7.60251
CASZ1	2.31366	3.08365e-37	1.42157e-35	0.183655	120.415
ARL13B	2.31068	1.73531e-34	7.23879e-33	0.19182	107.844
USPL1	2.30728	5.72631e-31	2.10878e-29	0.202269	139.545
AGO2	2.30703	4.31011e-119	1.80594e-116	0.0997208	504.108
P2RX5	2.30665	0.000496325	0.0019476	0.804611	6.58387
VWF	2.30529	0.000794665	0.00295123	0.857722	6.83399
SLC20A1	2.30234	1.01232e-50	7.2852e-49	0.154994	182.816
MIIP	2.29852	4.98407e-12	6.37549e-11	0.346909	30.5708
LOC103241405	2.29674	9.30308e-17	1.71499e-15	0.284229	53.856
LOC103218674	2.29551	3.541e-35	1.5174e-33	0.187798	140.553
CNR1	2.29251	0.000979781	0.00357326	0.875034	5.84687
DACT3	2.29146	0.00284124	0.00905383	1.02478	7.38792
ACRBP	2.29118	0.00117561	0.00419796	0.899888	5.89388
GCNT4	2.28658	0.000786161	0.00292513	0.842958	5.97581
STPG2	2.2858	0.00182538	0.00616361	0.958426	4.79904
LOC103221088	2.28498	8.11495e-05	0.000381279	0.668972	10.083
PRSS12	2.28413	4.83816e-08	3.91014e-07	0.448096	18.3506
ZNF57	2.28039	0.00010023	0.000461272	0.678601	9.19703
HSPA4	2.28027	8.64074e-129	4.07303e-126	0.094744	577.886
DNAI1	2.27403	0.00047201	0.0018576	0.787646	5.7049
MAMLD1	2.27179	6.58856e-48	4.34361e-46	0.157692	152.763
C23H5orf45	2.26949	4.68457e-25	1.32227e-23	0.223347	86.308
GTPBP4	2.26767	5.99379e-57	5.18408e-55	0.143568	198.59
IL12RB2	2.26703	2.58647e-09	2.46179e-08	0.402389	20.9591
PHLPP2	2.26638	1.47683e-46	9.40731e-45	0.159617	172.018
POLG2	2.26416	4.28397e-45	2.50852e-43	0.162238	139.878
LOC103233298	2.26302	9.37607e-05	0.000434149	0.668406	8.70644
PREX1	2.26038	1.64393e-49	1.13125e-47	0.154183	163.104
ORC1	2.25793	2.30608e-18	4.68043e-17	0.264894	52.1605
FAM160A1	2.2569	4.12814e-26	1.21809e-24	0.21709	95.4258
LOC103244007	2.25663	0.00129336	0.00455818	0.893035	5.51312
LOC103223784	2.25254	6.63421e-08	5.26244e-07	0.447226	22.941
SMCO2	2.25094	0.00215313	0.0071303	0.953832	7.17751
rna-NC_008066.1:9988..10055	2.24969	0.00010456	0.000478167	0.673277	8.34331
STK10	2.24934	2.88301e-47	1.86161e-45	0.156985	146.651
SOX15	2.24888	1.46382e-06	9.52063e-06	0.512082	14.8624
IKZF3	2.24884	0.00106487	0.00384787	0.865907	4.62967
ASAP2	2.24827	2.44323e-54	1.93559e-52	0.146043	212.65
SORBS2	2.24706	0.00148465	0.00515146	0.910196	4.96347
LOC103241986	2.24607	9.28882e-05	0.000430744	0.663014	9.04205
MYC	2.24198	2.70647e-94	6.45955e-92	0.109327	422.247
BRPF1	2.24191	2.03663e-63	2.21969e-61	0.134298	220.273
ACSL1	2.24052	1.47175e-19	3.18233e-18	0.253334	62.66
ZNF543	2.23849	0.00289649	0.00920345	1.0091	5.32711
CDK17	2.23735	1.18222e-38	5.70095e-37	0.173661	139.769
SLC35G6	2.23314	0.00250847	0.00813226	0.971351	6.1305
SLC7A11	2.22982	1.01309e-07	7.8094e-07	0.449358	46.3985
AHR	2.22694	3.65914e-44	2.09706e-42	0.161249	152.029
INHBA	2.22492	1.22381e-70	1.722e-68	0.1259	242.513
FAM83E	2.22128	4.09507e-05	0.000204266	0.616509	11.2324
LOC103221726	2.21883	9.01189e-06	5.0935e-05	0.55573	11.2407
IL7	2.21658	8.04193e-29	2.70286e-27	0.202041	89.7699
SMURF1	2.21622	6.27993e-88	1.27321e-85	0.112046	311.807
KIF26B	2.21453	1.62925e-05	8.79209e-05	0.577073	11.3969
LOC103246940	2.21193	0.00272937	0.00874613	0.982716	5.65944
SYNJ1	2.21159	2.35187e-36	1.05582e-34	0.177771	130.404
LOC103216147	2.20828	0.0024653	0.00801713	0.96368	6.70327
PAPPA	2.20677	1.18137e-09	1.18043e-08	0.382735	24.2028
LRRC42	2.206	1.89806e-41	1.00246e-39	0.165249	135.987
ARID4B	2.20524	5.95085e-109	1.96848e-106	0.099682	615.259
LOC103225801	2.20474	2.77705e-05	0.000142985	0.595049	10.9764
DDX21	2.2034	5.55252e-99	1.51729e-96	0.104766	375.598
RBPJL	2.20255	6.24844e-06	3.62729e-05	0.540716	15.7394
DNAJA4	2.20046	1.17292e-17	2.28939e-16	0.263943	130.684
TRIM36	2.19982	3.95149e-09	3.67384e-08	0.395294	31.7226
SRCRB4D	2.19853	0.000621361	0.00238513	0.7862	5.38012
RIPK1	2.1984	6.54169e-65	7.75746e-63	0.130056	236.036
LOC103228978	2.19815	1.8304e-88	3.83469e-86	0.110764	1901.61
TRNAR-CCG	2.19594	9.64448e-07	6.44618e-06	0.486916	15.2162
KBTBD8	2.1884	0.000397969	0.00160062	0.740187	9.60021
FHL2	2.18797	1.40468e-40	7.19708e-39	0.165969	153.919
DDX5	2.18205	6.14779e-140	5.03985e-137	0.0868351	625.289
KDM7A	2.18089	7.51026e-23	1.91878e-21	0.2259	82.8014
PPP1R15B	2.17944	5.29233e-91	1.13394e-88	0.108195	476.503
FNIP1	2.17556	4.91395e-92	1.09003e-89	0.107381	362.603
PCDH10	2.17179	0.000794329	0.00295057	0.794335	8.43369
SQLE	2.17052	7.15876e-15	1.15663e-13	0.28778	51.1243
MICAL3	2.17012	8.17422e-168	1.0275e-164	0.0788331	1060.96
GPER1	2.16804	2.80251e-07	2.03863e-06	0.455859	13.6532
ELK1	2.16714	8.81668e-35	3.71898e-33	0.178389	116.807
FBXW7	2.1662	1.02435e-60	1.02191e-58	0.13267	233.991
NABP1	2.16619	3.6508e-22	8.99815e-21	0.22818	74.0445
FAM110A	2.1644	0.000189756	0.00082439	0.679749	10.0737
CEMIP	2.16355	6.53517e-17	1.21519e-15	0.265582	52.5145
AGTPBP1	2.16114	3.87879e-15	6.39288e-14	0.283321	53.8677
PIM1	2.1608	2.34337e-35	1.00877e-33	0.17625	124.079
MEGF9	2.16035	3.33134e-12	4.33189e-11	0.322284	46.8786
ABHD5	2.1586	1.60303e-23	4.2332e-22	0.219909	86.979
OSBPL3	2.15702	2.60812e-57	2.28726e-55	0.136201	214.986
NR4A2	2.15673	1.05788e-05	5.91355e-05	0.544472	15.5461
ZNF615	2.15596	0.000932915	0.0034129	0.809206	7.2851
KLB	2.15479	0.000425998	0.00169456	0.733583	7.68205
HNRNPDL	2.15343	1.10225e-100	3.24734e-98	0.10152	420.581
HMCN2	2.15278	0.0017893	0.00605153	0.892564	4.71978
LOC103237450	2.1525	5.12025e-22	1.2538e-20	0.227433	94.788
LOC103233740	2.15224	6.34199e-05	0.000304038	0.615021	12.2247
LOC103231855	2.14933	2.05527e-09	1.98729e-08	0.377668	30.8777
NXN	2.1487	1.75456e-39	8.70584e-38	0.165018	143.259
MYSM1	2.14824	1.11321e-60	1.09893e-58	0.131649	199.975
ZNFX1	2.14799	5.22087e-76	8.27223e-74	0.116926	311.537
KIAA1462	2.14799	2.09765e-07	1.54678e-06	0.445372	23.0121
KMT2C	2.14599	4.75585e-132	2.49088e-129	0.088016	1727.65
MRC2	2.14587	2.00829e-17	3.86786e-16	0.259283	38.8977
FOXD1	2.14565	7.84991e-34	3.24583e-32	0.179303	139.661
LOC103220395	2.14474	0.000299925	0.00124151	0.703599	7.63106
DIDO1	2.14429	2.57116e-137	1.86459e-134	0.0862308	739.785
LOC103235002	2.14375	0.000263031	0.00110505	0.693969	7.95023
USP36	2.14315	6.07661e-139	4.77394e-136	0.0860209	711.835
LOC103225945	2.1414	1.28387e-15	2.19668e-14	0.275558	45.6997
LOC103227406	2.13987	3.58105e-30	1.2788e-28	0.190288	109.745
CDYL2	2.13636	1.10615e-06	7.33869e-06	0.476949	18.7375
GYG1	2.13417	2.9824e-06	1.82872e-05	0.500439	19.5485
CYLD	2.13154	2.02254e-56	1.71009e-54	0.13566	244.264
TRNAS-AGA	2.13079	7.24586e-06	4.16781e-05	0.525215	11.4148
NR6A1	2.12946	2.68026e-18	5.41075e-17	0.25002	71.2413
LOC103238239	2.12938	0.000804811	0.00298421	0.779189	7.00406
LOC103244187	2.1278	0.0013258	0.00465979	0.835486	5.83245
PKNOX1	2.1251	1.29922e-14	2.05682e-13	0.284559	48.6481
DNAJB5	2.12458	7.13084e-22	1.73486e-20	0.225547	95.6549
LOC103223872	2.12297	6.91986e-06	3.99614e-05	0.523395	12.7027
FBXO30	2.12259	1.18303e-22	3.00216e-21	0.220875	75.2178
EIF2AK3	2.12144	7.07818e-39	3.43082e-37	0.164547	155.128
LOC103242441	2.11972	1.41211e-05	7.72647e-05	0.544317	11.378
ZNF143	2.11869	1.52838e-32	6.02878e-31	0.180715	102.006
CCDC85B	2.11759	3.32049e-28	1.08318e-26	0.195286	111.751
GDF15	2.11574	1.65108e-74	2.53099e-72	0.116491	303.62
FBXO36	2.11118	0.000227848	0.000973505	0.672794	6.97904
ZNF34	2.11066	5.63746e-18	1.11303e-16	0.250377	53.9922
DUSP10	2.10941	2.35278e-22	5.86019e-21	0.221127	89.6546
ARVCF	2.10495	5.96888e-43	3.32968e-41	0.15479	190.442
LOC103229710	2.10451	0.000614022	0.00236129	0.747381	5.96492
FAXC	2.10406	7.91736e-05	0.000372925	0.611177	8.04143
COPS3	2.10374	4.54345e-25	1.28436e-23	0.206848	91.9722
TRNAE-UUC	2.10351	6.98199e-10	7.19374e-09	0.358218	27.5343
FLT3	2.10301	0.000177269	0.000775319	0.655656	8.26299
CALCRL	2.10265	0.000703962	0.00265729	0.758162	6.01713
PLA2G4C	2.10258	0.000446199	0.0017656	0.71853	6.03119
LOC103245337	2.10187	0.00061897	0.00237789	0.746423	6.46717
STAM	2.0973	1.48722e-36	6.69248e-35	0.16794	169.616
INTS6	2.09449	1.19377e-35	5.22238e-34	0.169994	139.234
BRD2	2.09404	5.62435e-106	1.8284e-103	0.0961297	929.524
PAPD5	2.09019	7.14087e-44	4.08003e-42	0.151908	177.034
CLK1	2.08982	3.89427e-59	3.72723e-57	0.129777	248.703
SKIDA1	2.08741	4.92533e-14	7.42936e-13	0.286154	59.4778
TERT	2.08645	0.00283541	0.00904215	0.925925	4.74764
TIAM1	2.08447	3.78064e-06	2.28988e-05	0.495695	18.901
ARSI	2.08385	0.00305742	0.00964007	0.942418	4.49067
LOC103248691	2.08222	0.000505818	0.00198155	0.723774	7.34065
EMP1	2.07893	2.66724e-05	0.000137859	0.556004	17.4875
CACNA1C	2.07254	0.00101553	0.00368937	0.780578	5.0644
RSRC2	2.06958	7.90962e-65	9.32099e-63	0.122515	277.048
HOXC11	2.06897	0.00237115	0.00774835	0.885859	4.87694
NPC1	2.06601	4.18088e-46	2.62768e-44	0.146142	213.68
ZEB2	2.06571	7.14589e-50	4.9718e-48	0.140331	236.072
NUAK1	2.06511	4.62101e-47	2.97369e-45	0.144551	173.587
STK17B	2.06468	7.23644e-30	2.56472e-28	0.18472	125.58
UVRAG	2.06162	1.54888e-40	7.91441e-39	0.156456	149.526
LOC103222020	2.05696	8.06792e-69	1.08658e-66	0.118037	387.464
MYBL1	2.05209	5.95268e-11	6.89846e-10	0.327251	39.2715
KANSL1	2.05185	1.27205e-129	6.31169e-127	0.0850163	731.11
HK1	2.05009	2.0604e-11	2.47918e-10	0.318803	34.2486
ISG20	2.04862	7.92388e-12	9.94043e-11	0.311738	32.9916
TRNAK-UUU	2.04795	4.67359e-07	3.28563e-06	0.438201	19.1311
BCL10	2.04782	2.78327e-25	7.92727e-24	0.200262	95.1412
LOC103222397	2.04774	2.33243e-05	0.000121823	0.543336	12.1961
CDKN1A	2.04756	4.2443e-49	2.87864e-47	0.140145	196.458
PARP2	2.04605	2.0501e-92	4.60175e-90	0.10082	501.471
PPP1R3C	2.04471	2.26863e-14	3.53221e-13	0.276228	51.4966
ZBTB11	2.0445	8.74655e-34	3.60079e-32	0.170801	150.514
LOC103243187	2.04306	5.77704e-05	0.000279083	0.57767	9.74546
BAIAP2L1	2.04063	4.83167e-26	1.42124e-24	0.196494	92.2247
LOC103246025	2.03958	0.00249531	0.00809934	0.880337	5.2746
HOMER1	2.03771	7.48241e-33	2.97639e-31	0.172814	138.047
B3GNT5	2.03766	9.41584e-07	6.30229e-06	0.449883	27.5837
LOC103225258	2.03589	3.10371e-07	2.24216e-06	0.428448	19.5365
LOC103235309	2.02682	0.00188206	0.00634134	0.830493	9.36192
LOC103228291	2.02609	0.000135107	0.000603372	0.614437	9.78654
PLEKHG7	2.02387	7.54436e-09	6.79317e-08	0.370672	30.2283
COG3	2.0222	1.39169e-25	4.00616e-24	0.196642	90.446
RND3	2.02216	3.17536e-21	7.45597e-20	0.218001	87.8979
CCNJ	2.01736	1.1327e-17	2.21454e-16	0.241556	67.457
UBA2	2.0158	4.07933e-72	6.05636e-70	0.112792	299.232
YTHDC1	2.01488	1.9162e-92	4.35301e-90	0.0992185	434.009
FRMD6	2.01466	6.34248e-31	2.3266e-29	0.176257	122.938
LIF	2.01337	1.01545e-54	8.14739e-53	0.130249	226.29
GABPB1	2.01258	1.79998e-18	3.67301e-17	0.2349	84.4884
LOC103221948	2.01179	8.14077e-13	1.11958e-11	0.291402	57.2977
ARRDC3	2.0105	1.75549e-30	6.36535e-29	0.177604	136.688
ABL2	2.00992	2.55788e-88	5.24227e-86	0.101334	395.531
RDH12	2.0074	0.0015483	0.00534226	0.797773	6.51344
CHD1	2.00736	1.69688e-100	4.92225e-98	0.0946589	548.072
RELT	2.00728	1.48917e-05	8.11278e-05	0.515598	24.004
SHROOM3	2.0063	3.67045e-13	5.19567e-12	0.285618	55.7847
SCYL2	2.00614	4.46672e-49	3.00785e-47	0.13756	244.013
BTG2	2.00474	1.14365e-18	2.35925e-17	0.23256	68.7561
KCMF1	2.00138	2.09665e-05	0.00011058	0.524743	12.5586
LOC103219219	2.00048	1.44016e-17	2.79077e-16	0.240327	66.3379
CHD7	2.00042	1.16434e-135	7.57021e-133	0.0809305	767.08
MXD1	2.00017	3.45708e-30	1.23687e-28	0.177313	121.06
LOC103221562	1.99519	0.000689397	0.0026112	0.711267	6.77949
PRKCG	1.99393	1.05692e-08	9.3957e-08	0.368908	31.5621
LDLR	1.99363	1.87543e-34	7.80602e-33	0.164799	146.149
GLT8D2	1.99264	0.00193753	0.00650268	0.81883	7.09608
CCNE2	1.99244	5.24819e-07	3.66227e-06	0.428306	17.1641
MITF	1.98846	7.56125e-36	3.34665e-34	0.160777	154.794
SRGAP1	1.98793	6.75912e-25	1.89648e-23	0.196314	109.367
ACTR3B	1.98754	2.32945e-14	3.62391e-13	0.268721	56.8736
GSG2	1.98532	1.65876e-06	1.06744e-05	0.450689	24.8406
KIF1C	1.98219	4.72731e-65	5.67729e-63	0.117089	307.249
LOC103214233	1.98086	0.000585768	0.00226418	0.692097	5.84477
TBR1	1.97739	2.8832e-06	1.7754e-05	0.460119	17.7807
LOC103240047	1.9756	2.2336e-06	1.40335e-05	0.454674	18.122
PHF21B	1.97428	1.20551e-17	2.35056e-16	0.236493	84.795
ZCCHC2	1.97364	2.27838e-50	1.61499e-48	0.133148	230.425
LOC103240069	1.97219	2.15925e-12	2.86105e-11	0.291082	50.2698
TRNAF-GAA	1.97172	6.99623e-05	0.000332622	0.56299	10.2906
PIP5K1A	1.97014	1.52158e-63	1.68761e-61	0.117797	290.739
LOC103236665	1.96999	7.47127e-22	1.81534e-20	0.209125	97.476
FOXO1	1.96935	5.2746e-22	1.28825e-20	0.208002	95.594
CAMSAP1	1.96719	3.5559e-67	4.46977e-65	0.114361	310.042
HS3ST3B1	1.96589	1.27456e-15	2.18272e-14	0.252781	75.6723
CPT1C	1.96562	0.00109646	0.00394847	0.742434	6.46901
AREG	1.96493	8.63314e-06	4.89263e-05	0.485986	20.1685
UBR5	1.96319	1.06994e-134	6.72454e-132	0.0797069	883.927
SUPV3L1	1.96273	3.07439e-37	1.42077e-35	0.15548	177.331
TBCC	1.96181	6.30826e-14	9.45487e-13	0.269907	42.6652
FASN	1.96054	1.14686e-92	2.63708e-90	0.0964441	630.239
UAP1	1.96053	1.11924e-33	4.57773e-32	0.164088	152.697
THSD1	1.959	0.000239376	0.00101838	0.620357	9.43327
PLEKHM1	1.95632	2.77067e-58	2.52372e-56	0.122439	300.276
BAZ1A	1.95394	1.01356e-64	1.187e-62	0.115678	321.898
TRNAY-GUA	1.95127	1.87821e-06	1.196e-05	0.443296	15.4239
LOC103236729	1.94864	5.96299e-06	3.47764e-05	0.472279	21.4901
EGR3	1.94655	6.66034e-07	4.56823e-06	0.42291	24.6875
DENND2C	1.94594	4.02412e-09	3.73509e-08	0.348942	31.4346
EMILIN2	1.94379	0.0030149	0.00952991	0.856406	5.46912
SLC39A10	1.94196	1.42946e-34	5.97616e-33	0.159376	152.353
PTP4A1	1.94171	4.98846e-72	7.29127e-70	0.108734	350.923
RBFOX3	1.93904	2.11597e-05	0.000111505	0.50737	23.4733
LOC103216175	1.9382	2.75548e-05	0.000141991	0.515822	11.5242
LOC103216163	1.9336	0.00292943	0.0092956	0.846195	5.48185
GBX2	1.933	4.02863e-05	0.000201165	0.529696	18.7881
INTS2	1.93054	2.00638e-56	1.70406e-54	0.12284	200.423
PMEPA1	1.92879	2.19189e-32	8.61001e-31	0.16482	166.417
PLK2	1.92108	4.05623e-110	1.39055e-107	0.0864511	620.105
WDR43	1.9207	4.38922e-57	3.81377e-55	0.121329	265.716
NAV3	1.92053	1.20872e-76	1.94789e-74	0.104161	354.636
CWC25	1.91982	4.9169e-40	2.48547e-38	0.146369	147.048
CYTH1	1.91755	7.27655e-27	2.23452e-25	0.181499	97.8288
MID1	1.91726	4.56475e-18	9.07894e-17	0.226299	81.0094
PTPN21	1.91654	2.37444e-25	6.79364e-24	0.187227	134.464
PLK3	1.91514	7.82787e-10	7.9997e-09	0.326634	33.8877
LOC103225095	1.91484	7.05268e-08	5.55465e-07	0.378639	29.159
LOC103219103	1.91147	0.000733313	0.0027554	0.680183	8.25018
CAMTA1	1.91034	3.86312e-41	2.0177e-39	0.143538	187.563
PLAUR	1.91001	3.66543e-14	5.60516e-13	0.259542	66.587
NUAK2	1.90944	1.27656e-64	1.48577e-62	0.113161	269.947
GADD45A	1.90883	1.71134e-28	5.68088e-27	0.174827	142.814
PLCH2	1.90684	1.42158e-12	1.9173e-11	0.279446	45.3366
SLC16A10	1.90442	6.99645e-05	0.000332622	0.543377	14.3112
LOC103217499	1.90409	0.000753746	0.00282213	0.680927	6.78422
LOC103214729	1.9031	0.00018748	0.000815442	0.586216	9.64006
LOC103219296	1.90309	0.00119297	0.00424723	0.721281	10.8039
ERRFI1	1.90268	3.01677e-35	1.2957e-33	0.155476	150.293
UBE2S	1.90198	1.39725e-31	5.35471e-30	0.164741	169.931
ACTG2	1.89709	0.000900808	0.00330635	0.692398	7.0711
DLX1	1.89648	3.67818e-07	2.62498e-06	0.399857	19.3195
NXF1	1.89473	3.13736e-37	1.4428e-35	0.150223	159.523
HSP90AB1	1.89379	3.44884e-104	1.04884e-101	0.0877338	1288.07
ERN1	1.89343	4.11801e-23	1.06655e-21	0.194814	98.794
RAB26	1.89341	7.26069e-07	4.95118e-06	0.411707	20.6338
SMG1	1.89085	4.96601e-133	2.75394e-130	0.0772674	1067.99
SSFA2	1.8908	1.58464e-99	4.39389e-97	0.0896388	532.444
TBC1D10A	1.89062	5.6608e-12	7.19234e-11	0.285081	49.1299
NOL6	1.88932	2.40082e-18	4.86747e-17	0.22093	69.6016
DIP2B	1.88908	2.27376e-82	4.28718e-80	0.0983113	410.812
LOC103231698	1.88861	0.00147424	0.00512101	0.734626	7.42958
MCM10	1.88797	6.48175e-23	1.66277e-21	0.194938	98.9762
RIOK1	1.88314	5.22417e-18	1.03468e-16	0.222433	80.2773
LOC103218789	1.88232	0.000949725	0.00347036	0.693789	7.61863
N4BP3	1.88195	3.39045e-07	2.42884e-06	0.395981	29.8313
AKAP2	1.88069	4.8826e-54	3.81998e-52	0.122306	290.675
rna-NC_008066.1:12129..12197	1.8801	4.79472e-07	3.36576e-06	0.402039	24.8009
RAP1GDS1	1.88003	6.49081e-17	1.20814e-15	0.230298	96.2499
FBXW11	1.87972	2.9371e-49	1.99924e-47	0.128402	234.358
CRHR1	1.87606	0.00141792	0.00494909	0.72731	7.5521
MED26	1.87062	2.72453e-17	5.19425e-16	0.226669	81.8934
IER3	1.87061	4.15508e-46	2.6202e-44	0.132275	219.677
SLC7A5	1.86935	1.30065e-54	1.03914e-52	0.120947	315.544
LOC103223515	1.86849	6.18236e-05	0.00029699	0.523463	14.3703
LOC103221947	1.86811	1.78061e-09	1.73416e-08	0.326196	44.8378
GPBP1	1.86532	5.18065e-56	4.30313e-54	0.119012	315.848
LOC103215364	1.86506	1.05811e-06	7.03231e-06	0.413344	24.9658
CLDN4	1.86503	2.08547e-37	9.66133e-36	0.147389	270.984
CDKN2C	1.86459	3.27721e-16	5.83492e-15	0.234362	81.1343
KDM5B	1.86397	2.79986e-63	3.01665e-61	0.111599	324.57
LOC103246584	1.86303	1.93822e-06	1.23255e-05	0.424343	17.8793
LOC103240214	1.86303	8.55818e-05	0.000399813	0.536956	12.3245
KLHL21	1.86223	1.75601e-35	7.6114e-34	0.151431	194.11
LOC103246839	1.86166	1.19778e-13	1.75478e-12	0.259105	44.2742
RLF	1.86138	3.3609e-67	4.28174e-65	0.108387	349.813
VAV1	1.86104	4.112e-07	2.91473e-06	0.394339	18.8658
PTCH1	1.86081	9.68182e-32	3.72553e-30	0.160614	144.126
PRR7	1.86002	5.47112e-07	3.80657e-06	0.398895	23.9893
HSPD1	1.85864	7.91642e-68	1.02236e-65	0.107297	464.586
TRIO	1.85757	3.5563e-110	1.24174e-107	0.0835877	1114.58
KHDRBS3	1.85554	5.2278e-11	6.09209e-10	0.294154	45.6935
MSANTD4	1.85443	3.07825e-23	8.01663e-22	0.189968	92.0871
CD300C	1.854	0.00284123	0.00905383	0.801226	9.94579
LOC103222013	1.85382	2.98422e-56	2.50078e-54	0.118095	329.538
LOC103243203	1.85258	8.2491e-14	1.22566e-12	0.25561	51.1649
KDM6A	1.85114	2.39811e-45	1.41301e-43	0.132058	242.186
LOC103246660	1.85007	0.000456356	0.00180314	0.622343	10.6036
TAF1L	1.84976	2.2358e-05	0.0001171	0.483165	15.7352
PRKG1	1.84859	4.29838e-13	6.03919e-12	0.263128	47.1829
CDKL3	1.84704	7.78832e-06	4.45401e-05	0.451577	17.4922
TET3	1.84549	4.99222e-59	4.72891e-57	0.114652	325.479
TPT1	1.84466	6.93961e-71	9.9126e-69	0.104199	382.344
SBNO1	1.844	3.30721e-67	4.242e-65	0.107053	330.912
WDR3	1.8406	6.39357e-28	2.0607e-26	0.170343	128.266
KLHL26	1.84057	2.89932e-18	5.82799e-17	0.215614	94.8524
CDK14	1.8394	8.7129e-67	1.08796e-64	0.10711	363.373
KLF11	1.83772	1.19097e-36	5.38509e-35	0.146794	178.495
EFNB2	1.83584	1.20073e-15	2.0619e-14	0.235627	74.7431
RCAN1	1.83323	2.38068e-45	1.40714e-43	0.130825	264.294
LOC103217933	1.82856	0.000737833	0.00277106	0.646605	8.28783
NOTCH4	1.82609	1.16812e-05	6.47982e-05	0.458366	13.777
UBR4	1.82442	1.19113e-125	5.47777e-123	0.0767478	1602.36
CLIP1	1.82375	7.12135e-95	1.79031e-92	0.0886036	595.545
MDM2	1.82294	1.24847e-47	8.17355e-46	0.126715	182.759
IL6	1.82068	4.18079e-07	2.95793e-06	0.385255	26.6417
PIK3CD	1.8205	6.30027e-46	3.8948e-44	0.129386	241.692
MCIDAS	1.81983	0.000646775	0.00246522	0.635077	10.5397
BTBD10	1.81976	1.79069e-19	3.85869e-18	0.20589	95.6242
PTCHD2	1.81595	0.00308681	0.00971811	0.789996	6.06533
JMJD6	1.81212	1.51881e-33	6.18467e-32	0.15182	179.051
EPHB2	1.81164	9.86538e-38	4.62716e-36	0.142486	203.501
TP53BP2	1.80552	1.92033e-79	3.32182e-77	0.0960801	495.834
LOC103222702	1.80534	0.00111527	0.00400845	0.672107	9.38049
FCGBP	1.80465	1.97853e-06	1.25564e-05	0.41054	16.1757
ARID2	1.80091	1.07674e-62	1.13419e-60	0.108382	305.246
SEC31B	1.80021	0.000407994	0.00163433	0.595119	8.87416
CEACAM19	1.7989	2.10611e-08	1.79119e-07	0.338686	37.265
CACNA1A	1.79856	1.57367e-06	1.01685e-05	0.404174	21.1758
NR3C1	1.79828	2.67803e-50	1.87711e-48	0.121418	268.927
NDUFAF5	1.79765	7.09331e-05	0.000336888	0.509422	18.6966
SCAF4	1.79366	8.81684e-46	5.37999e-44	0.127358	313.308
SLC10A1	1.79268	0.000411776	0.00164632	0.591681	8.9969
BHLHE40	1.79191	1.14425e-94	2.83879e-92	0.0871351	630.629
CHD2	1.7902	1.00316e-99	2.82308e-97	0.0847426	1089.45
MEF2D	1.78949	1.63031e-45	9.75856e-44	0.127384	240.994
CABP1	1.78947	0.00148949	0.00516595	0.691636	7.55834
TRNAV-CAC	1.78624	1.26415e-06	8.30795e-06	0.397282	20.5765
DNAJA1	1.78598	7.25594e-50	5.0298e-48	0.121226	318.729
NUP98	1.78538	1.25024e-86	2.4814e-84	0.0908838	586.129
GNA13	1.78407	1.11761e-61	1.15783e-59	0.108295	381.917
ACOXL	1.78382	6.24619e-06	3.6271e-05	0.430117	16.7423
KIF18A	1.78315	3.56157e-15	5.8914e-14	0.2326	73.9206
LOC103222000	1.78281	1.35959e-15	2.32412e-14	0.228762	85.1953
XPO6	1.78268	3.36932e-74	5.12326e-72	0.0982706	423.394
FSIP1	1.78245	7.30922e-07	4.97888e-06	0.385947	24.5528
LOC103238332	1.78132	0.00213108	0.00707116	0.722855	8.56494
KIAA1432	1.78105	1.39368e-36	6.28658e-35	0.142459	188.75
ARNTL2	1.7803	4.63888e-17	8.7031e-16	0.217	77.9354
LOC103244341	1.77934	3.8361e-13	5.42609e-12	0.252545	55.1571
SPAG9	1.77925	4.02177e-97	1.0532e-94	0.0854321	631.242
GTF2H1	1.77796	5.65894e-29	1.92946e-27	0.16112	153.954
MEX3C	1.77769	2.08361e-38	9.94595e-37	0.138418	213.448
SYNJ2	1.77498	1.57381e-22	3.97245e-21	0.18492	120.203
DDX31	1.77437	1.76258e-12	2.36034e-11	0.260267	58.6795
CELSR3	1.77148	9.04909e-51	6.53719e-49	0.119636	318.625
FNIP2	1.77139	2.10329e-45	1.25103e-43	0.126351	274.537
CLCN6	1.77072	7.8361e-27	2.40243e-25	0.167684	145.146
SPEN	1.76996	1.88372e-112	7.10349e-110	0.0788126	1369.82
DOCK9	1.76653	1.32286e-24	3.67884e-23	0.175154	162.936
LOC103246661	1.76635	3.66336e-32	1.43304e-30	0.151441	213.939
WHSC1	1.76583	4.24383e-79	7.27431e-77	0.0942094	459.574
AMMECR1L	1.76331	2.95614e-31	1.117e-29	0.153469	176.763
PTX3	1.7628	2.05618e-05	0.000108689	0.457553	21.0252
PHLPP1	1.76221	1.68018e-43	9.48494e-42	0.128784	230.127
TPX2	1.76068	7.66264e-32	2.97895e-30	0.151725	197.959
BMP2	1.75956	3.81609e-50	2.6649e-48	0.119033	289.706
EXOSC9	1.75952	2.518e-10	2.72699e-09	0.289712	44.2074
LOC103244556	1.75934	2.97963e-27	9.30147e-26	0.164757	137.631
FLNC	1.75895	6.72311e-93	1.56499e-90	0.086393	1467
URB1	1.75809	5.04796e-24	1.36556e-22	0.176214	115.598
LOC103222024	1.75798	1.26696e-08	1.11369e-07	0.325539	49.9888
DOT1L	1.75687	5.26099e-61	5.27638e-59	0.107259	317.997
VWCE	1.75678	7.04378e-06	4.06148e-05	0.42567	16.1938
SFSWAP	1.75632	7.98009e-54	6.19196e-52	0.114483	326.995
WSB2	1.75615	8.11302e-38	3.82427e-36	0.137895	193.935
METTL12	1.75529	2.84266e-20	6.39599e-19	0.193904	96.4211
ARNTL	1.75495	6.73965e-13	9.33697e-12	0.25178	66.1981
HES2	1.75305	0.00233929	0.00765619	0.72121	7.53522
UIMC1	1.7518	1.23472e-26	3.74286e-25	0.166315	119.679
C25H1orf116	1.75075	0.00259697	0.00838027	0.729536	7.41894
MED27	1.75037	4.02436e-08	3.29767e-07	0.336896	35.1177
ETF1	1.74937	1.82278e-42	9.90445e-41	0.129146	224.566
IRX5	1.74815	0.00021221	0.00091227	0.541337	14.7091
MACF1	1.74806	1.15858e-96	2.95203e-94	0.0840883	2350.69
SH3BP4	1.74781	7.75115e-42	4.17565e-40	0.130809	231.444
PANX1	1.74549	2.26309e-11	2.71442e-10	0.270579	53.1223
SYBU	1.74541	1.88984e-09	1.83581e-08	0.304159	39.9785
LOC103222071	1.74447	0.000815172	0.00301907	0.619458	10.304
SUZ12	1.7439	4.64769e-51	3.39659e-49	0.116815	256.578
TG	1.74169	2.86107e-11	3.40779e-10	0.271481	40.1112
DNAH10	1.74149	1.35426e-08	1.18435e-07	0.322778	30.7357
CCSAP	1.74064	4.51285e-09	4.16698e-08	0.311044	48.1232
KPNA4	1.74061	2.11961e-55	1.73762e-53	0.111699	280.858
KAT6A	1.73954	7.30209e-79	1.24037e-76	0.0928907	533.034
ZNF317	1.73942	5.82232e-15	9.48012e-14	0.228862	78.9969
PFKFB3	1.7391	1.75159e-104	5.59766e-102	0.0803906	701.203
LOC103242134	1.73877	2.26923e-09	2.17091e-08	0.304235	38.4138
SMTN	1.73813	3.8998e-26	1.15433e-24	0.166804	134.895
CDR2L	1.73743	1.06444e-07	8.17846e-07	0.346839	37.3157
UBE2J2	1.73526	4.99441e-22	1.22457e-20	0.183019	102.807
TAF1D	1.73458	2.74873e-36	1.23105e-34	0.139758	205.436
RGS7	1.7334	1.81701e-10	1.99141e-09	0.282299	47.7273
ZIC5	1.73242	1.05121e-07	8.08673e-07	0.346614	30.6064
RHOQ	1.73136	1.50506e-10	1.66929e-09	0.281089	54.8332
STXBP5L	1.73057	3.97718e-05	0.000198964	0.466478	17.0117
BMI1	1.73053	2.14013e-22	5.34465e-21	0.180517	116.335
UBE2F	1.73002	2.62069e-08	2.19711e-07	0.328133	36.0629
LOC103239310	1.72997	1.39979e-12	1.89198e-11	0.252171	55.7568
TIAM2	1.72826	2.90301e-05	0.000149064	0.456802	16.5414
LOC103215470	1.72592	1.18134e-08	1.04427e-07	0.318367	38.3888
TMEM2	1.72575	1.19108e-37	5.57266e-36	0.136378	213.334
PGM2	1.72546	1.30352e-31	5.00567e-30	0.149185	165.919
MTHFD2L	1.72307	5.08499e-07	3.55586e-06	0.36655	24.9658
RIOK3	1.71999	2.89572e-36	1.29381e-34	0.138124	201.169
NXT1	1.71873	4.01458e-05	0.000200583	0.4647	20.8615
FRYL	1.71762	1.86853e-57	1.65405e-55	0.108205	346.177
EGR2	1.71751	3.96404e-15	6.52199e-14	0.224335	63.0257
CCNE1	1.71636	8.93328e-10	9.08506e-09	0.29225	46.2108
BTBD11	1.71414	2.1868e-16	3.93435e-15	0.213353	83.4521
ZC3HAV1	1.71306	1.24698e-60	1.22458e-58	0.104861	350.001
PRRT2	1.71233	0.00141661	0.00494542	0.650848	8.38469
POC1A	1.71033	1.69685e-09	1.65772e-08	0.296556	39.3647
AVPI1	1.70801	4.93736e-05	0.000242243	0.467189	17.3432
TRNASTOP-UCA	1.70795	0.000261601	0.00110002	0.536187	11.9079
LOC103220195	1.70742	3.47465e-05	0.000175972	0.456663	16.3795
FOXN2	1.70603	2.35142e-19	5.03818e-18	0.193312	112.022
PPP1R10	1.7058	1.57556e-68	2.09206e-66	0.0979532	466.406
LIN54	1.70484	3.9239e-16	6.94044e-15	0.214069	85.6085
KCNJ8	1.70463	1.77136e-31	6.74726e-30	0.14764	146.31
ZBTB49	1.70284	6.36677e-08	5.0631e-07	0.332967	35.6632
EAF1	1.70131	7.20145e-29	2.4247e-27	0.154479	163.075
UBASH3B	1.7012	4.95451e-47	3.17746e-45	0.11902	258.7
CYR61	1.70111	3.48718e-67	4.41281e-65	0.0987509	440.772
SLC12A2	1.69955	2.40653e-09	2.29515e-08	0.297784	42.7087
PKD1L3	1.69868	0.00179531	0.0060686	0.664054	7.17603
AKAP12	1.69867	1.67356e-52	1.26727e-50	0.112118	287.415
PDZD8	1.69866	1.44845e-53	1.11471e-51	0.110906	331.345
CCT6A	1.69621	1.62584e-45	9.75856e-44	0.120689	242.102
ZC3H4	1.69577	1.09346e-80	1.96354e-78	0.0895326	521.078
RHOB	1.69506	4.08213e-58	3.70041e-56	0.106216	406.593
DYRK3	1.69505	8.11163e-07	5.48582e-06	0.367428	28.6531
UBC	1.69487	5.86418e-60	5.67021e-58	0.104002	615.048
LOC103230320	1.69476	1.62738e-07	1.2186e-06	0.343799	27.5936
KLHL29	1.69447	2.42979e-14	3.76448e-13	0.228444	82.0551
CDKN2AIP	1.69401	1.2406e-13	1.81049e-12	0.23511	73.6466
OPTN	1.6939	1.73494e-28	5.74909e-27	0.154941	159.551
LOC103228468	1.69195	2.82293e-06	1.74341e-05	0.389763	31.9705
LOC103220041	1.69154	4.97688e-06	2.94628e-05	0.401017	22.3872
HIVEP3	1.69126	2.26824e-28	7.45083e-27	0.154917	203.568
TLCD2	1.69054	3.0434e-11	3.61811e-10	0.263547	44.2759
RRAS2	1.68839	6.30863e-26	1.84704e-24	0.162565	133.744
FAM72A	1.68718	0.000367745	0.00149018	0.546976	17.6942
GPAM	1.68679	6.33294e-29	2.15149e-27	0.153011	150.792
CEP76	1.68496	3.00453e-06	1.84049e-05	0.388964	30.1381
MUC5B	1.68437	5.2208e-08	4.20138e-07	0.326766	24.1444
GDF11	1.68359	6.38581e-08	5.0718e-07	0.328965	35.112
ENAH	1.68347	2.55374e-64	2.86612e-62	0.099986	416.134
USP25	1.6814	1.58548e-29	5.54623e-28	0.151123	159.384
VPS37B	1.67888	1.66385e-23	4.38155e-22	0.170807	134.996
CDON	1.67838	4.42571e-08	3.60461e-07	0.32357	34.9497
MARCH4	1.67812	0.000457886	0.00180843	0.552825	12.3706
ELL2	1.67741	1.29181e-46	8.25664e-45	0.117827	271.825
LOC103214208	1.6771	0.00245365	0.00798336	0.686084	7.55035
PAXIP1	1.67666	3.64668e-30	1.29733e-28	0.148639	154.066
TANC1	1.67082	1.48009e-32	5.85054e-31	0.142056	201.062
LTBP2	1.6697	3.85387e-09	3.59015e-08	0.296442	36.326
SYTL3	1.66968	8.32551e-06	4.72824e-05	0.407156	25.1092
LOC103242995	1.66802	4.85656e-05	0.000238713	0.454818	19.7169
NSUN6	1.66774	1.45172e-06	9.44848e-06	0.371851	28.4222
RBBP6	1.66715	1.39744e-74	2.15973e-72	0.0916482	444.157
ALKBH1	1.66617	2.12956e-06	1.34336e-05	0.377631	23.4685
REV3L	1.66342	1.0607e-55	8.77168e-54	0.106397	384.346
LOC103228467	1.66253	0.00277642	0.00887728	0.693644	8.50581
MAFG	1.66203	2.36522e-42	1.2815e-40	0.122859	302.589
SETD3	1.66199	6.45652e-28	2.07743e-26	0.153765	154.085
BCL11B	1.66198	0.0028748	0.00914995	0.696353	9.82477
PPIF	1.66185	1.64533e-15	2.78481e-14	0.213396	75.0774
PTPN14	1.66119	4.44007e-94	1.04647e-91	0.0809872	1030.6
VEGFA	1.66051	6.99949e-51	5.07598e-49	0.11164	361.082
KLLN	1.66026	0.00119328	0.00424755	0.611523	10.3541
SLC16A9	1.6596	1.01061e-05	5.67112e-05	0.409059	21.4069
ANKRD28	1.65941	3.86759e-43	2.1639e-41	0.121467	256.952
TRIM47	1.6588	1.51783e-13	2.19975e-12	0.230961	74.2383
SETD5	1.65858	2.88594e-70	4.0307e-68	0.0940462	529.183
TSPYL2	1.658	3.43219e-19	7.30405e-18	0.188548	100.005
LOC103243157	1.65615	0.000201699	0.000871059	0.506984	18.9432
PELI1	1.65444	5.0735e-24	1.3705e-22	0.166022	132.987
METRNL	1.65402	1.84903e-14	2.89805e-13	0.221457	94.0552
FAF1	1.65376	7.04911e-29	2.37765e-27	0.149838	158.364
EPC1	1.65315	3.60837e-30	1.28612e-28	0.146479	195.15
SLC7A6	1.65313	1.02898e-10	1.16107e-09	0.265315	55.0406
PPP1R12A	1.65243	1.20903e-79	2.11076e-77	0.087787	705.391
KMT2E	1.65229	9.81904e-80	1.73026e-77	0.087715	549.932
ZNF131	1.65228	1.00343e-19	2.19485e-18	0.185162	111.087
CPA4	1.65144	7.00177e-09	6.3379e-08	0.29898	50.2786
DAAM1	1.65032	4.73076e-29	1.61885e-27	0.149441	167.573
TRNAE-CUC	1.6469	1.24719e-08	1.09784e-07	0.30348	36.698
rna-NC_008066.1:657..1604	1.64558	6.34865e-45	3.69456e-43	0.117994	361.136
NAA16	1.6444	4.43611e-16	7.80979e-15	0.207176	94.5343
ZBTB34	1.6442	2.27926e-10	2.47983e-09	0.269771	47.5932
ATRIP	1.64353	8.59455e-08	6.67698e-07	0.324513	33.5976
SLC20A2	1.63905	6.0449e-13	8.40535e-12	0.2346	74.0517
NAT10	1.63813	6.18012e-17	1.15144e-15	0.200159	87.33
SRXN1	1.63744	3.33636e-05	0.000169378	0.434577	21.4732
LOC103238512	1.63648	2.7699e-06	1.7129e-05	0.376036	23.2114
WDR62	1.63429	1.56982e-12	2.10968e-11	0.237989	68.6561
MED13	1.63068	2.59104e-91	5.6154e-89	0.0807336	743.29
HECTD2	1.62965	4.69143e-13	6.57184e-12	0.231822	70.561
LOC103233793	1.62953	0.00175287	0.00594407	0.629238	10.3047
PAK2	1.62898	1.50704e-44	8.71631e-43	0.117192	250.551
HSPA9	1.62808	1.16221e-69	1.59953e-67	0.092722	583.684
COPS2	1.62717	9.91448e-28	3.16843e-26	0.150873	166.014
TEX14	1.62559	0.000243114	0.00103194	0.503452	14.9591
RANBP9	1.62525	5.90003e-29	2.00803e-27	0.147301	160.419
LOC103218065	1.62492	4.75777e-24	1.29076e-22	0.163033	135.332
RASAL2	1.62426	5.12619e-52	3.83549e-50	0.107714	324.979
JUNB	1.623	5.38192e-58	4.85531e-56	0.101617	542.555
EHD4	1.62246	5.03629e-14	7.5846e-13	0.221173	76.4438
DLG2	1.62154	1.64312e-22	4.13631e-21	0.168769	105.13
C20H1orf52	1.62109	1.15404e-07	8.8202e-07	0.322714	40.6853
RPS27A	1.62101	1.44723e-21	3.44975e-20	0.172688	113.058
SMAP1	1.62072	3.98252e-18	7.95449e-17	0.190519	96.6259
GTF2IRD1	1.62065	2.45637e-18	4.96941e-17	0.189059	104.039
JMJD1C	1.62062	3.59438e-76	5.7434e-74	0.0880868	640.785
TRNAC-GCA	1.61941	1.40081e-08	1.22053e-07	0.299014	36.5582
PRTG	1.61614	7.89031e-09	7.081e-08	0.292987	36.6964
ODC1	1.61591	3.26371e-40	1.66317e-38	0.122545	277.374
TTC39C	1.61447	9.86877e-09	8.80623e-08	0.294867	38.308
CTU2	1.61384	7.17931e-06	4.13457e-05	0.389093	23.465
LOC103222007	1.61367	7.37749e-09	6.65881e-08	0.292224	58.7512
LOC103229159	1.61353	0.000382526	0.00154345	0.520626	12.0855
TBC1D22B	1.61169	9.26615e-24	2.48172e-22	0.162794	153.75
RIMS2	1.61169	5.13985e-31	1.90397e-29	0.140736	163.384
BYSL	1.61161	3.02559e-14	4.64934e-13	0.217413	76.2
PPP1R14B	1.61037	1.49632e-18	3.07332e-17	0.186902	96.8155
RNASEH2A	1.61004	2.91048e-07	2.11391e-06	0.332569	29.5318
BCL6	1.60869	1.13796e-42	6.25544e-41	0.118415	329.539
ZEB1	1.60815	4.05602e-54	3.19984e-52	0.104388	363.604
LOC103223323	1.60772	0.00127092	0.00448497	0.592881	11.0222
SRRT	1.60574	2.23211e-69	3.04974e-67	0.0920563	458.82
ZNF274	1.60485	2.73171e-06	1.69095e-05	0.367176	31.0579
CAMSAP2	1.60479	1.2893e-34	5.40216e-33	0.132461	216.163
ZNF823	1.60391	1.09445e-07	8.39193e-07	0.319299	34.8213
GOLGA8M	1.60379	1.31337e-05	7.21959e-05	0.40045	20.6678
NANOS1	1.60346	1.63054e-08	1.41124e-07	0.297941	54.3784
ZNHIT2	1.60247	4.93496e-06	2.92514e-05	0.377535	22.9388
PTBP2	1.60001	4.67121e-17	8.75504e-16	0.194341	106.675
GIGYF2	1.59926	9.18656e-77	1.49321e-74	0.0865978	502.892
PIP5K1B	1.59827	0.00144539	0.0050319	0.599169	11.465
XPO4	1.59799	6.97296e-26	2.03522e-24	0.153883	149.075
LOC103238689	1.59778	1.49359e-24	4.14142e-23	0.158392	120.767
KLHL18	1.59713	9.86815e-11	1.11616e-09	0.25554	59.8156
TMEM74	1.5967	0.000345767	0.00141144	0.50764	13.1922
ADM	1.59587	5.117e-12	6.53666e-11	0.238371	73.423
SLC4A7	1.59456	2.00766e-21	4.75559e-20	0.170595	124.003
LOC103225896	1.59449	6.28541e-07	4.33314e-06	0.340196	28.7934
POLA2	1.59332	8.2931e-12	1.0376e-10	0.240821	59.5224
ZSWIM4	1.5933	8.72202e-22	2.10838e-20	0.168726	118.649
RPS12	1.59317	1.80023e-35	7.78515e-34	0.129378	227.272
RBM27	1.5921	1.59532e-48	1.06666e-46	0.109491	327.246
LOC103221720	1.5905	0.000105063	0.00048035	0.456638	13.667
ZNF217	1.58835	1.21542e-58	1.12337e-56	0.0989449	452.748
STAMBPL1	1.58762	7.60652e-22	1.84346e-20	0.167699	125.203
SEMA3C	1.58713	4.93955e-46	3.07377e-44	0.112224	311.675
ARHGAP9	1.58632	6.09963e-05	0.000293268	0.435197	16.9114
MKL1	1.58596	7.72069e-41	3.98832e-39	0.119267	283.285
ALX1	1.58496	0.00157158	0.0054034	0.599835	12.4076
PSD	1.58447	0.000303012	0.00125374	0.498201	14.2447
YTHDF1	1.58228	1.90535e-26	5.71151e-25	0.150627	168.511
DAPK3	1.58191	2.14031e-20	4.83879e-19	0.173743	126.926
DNAJA2	1.57979	6.65733e-25	1.8707e-23	0.155524	147.388
SGK1	1.57946	1.2795e-11	1.56859e-10	0.240909	60.7865
CHORDC1	1.57907	3.52306e-19	7.48899e-18	0.179741	161.363
PCF11	1.57865	2.05712e-64	2.33657e-62	0.0935803	535.845
PPP2R2D	1.57698	4.13665e-18	8.25361e-17	0.185125	101.231
JUND	1.57674	2.25765e-54	1.79611e-52	0.102191	413.874
RBM19	1.57632	1.69669e-35	7.38825e-34	0.127954	208.972
GLIS3	1.57604	3.92282e-59	3.73559e-57	0.0977621	463.815
ZRANB1	1.57586	1.11206e-35	4.87624e-34	0.12765	228.808
PPTC7	1.57548	2.87782e-15	4.82322e-14	0.204221	86.1182
rna-NC_008066.1:1674..3225	1.57546	1.94546e-63	2.13265e-61	0.0941744	550.281
SAP30	1.57439	5.75597e-07	3.9915e-06	0.334873	36.087
OSER1	1.5742	2.91912e-14	4.4894e-13	0.212186	81.1074
ALS2CR12	1.57348	0.000466793	0.00183937	0.514591	10.8391
USP42	1.573	3.73911e-31	1.39883e-29	0.136966	205.278
SLC25A3	1.57288	1.43091e-45	8.67516e-44	0.111844	323.665
TRA2B	1.57229	5.40295e-39	2.63237e-37	0.121433	277.296
FAM133B	1.57207	2.76154e-16	4.94012e-15	0.196335	97.1175
STK17A	1.5719	2.56236e-08	2.15204e-07	0.295783	47.4098
UCK2	1.57069	9.19481e-34	3.77708e-32	0.130938	214.671
ZZEF1	1.57031	4.3215e-52	3.24629e-50	0.104031	398.107
LOC103244222	1.57014	4.42863e-06	2.64529e-05	0.367542	23.6659
ARHGEF10	1.56932	1.19278e-16	2.18136e-15	0.193219	93.7138
ZNF558	1.56903	1.67892e-05	9.03943e-05	0.397153	24.132
STX10	1.56864	1.16716e-13	1.71392e-12	0.217237	74.6785
HMBS	1.56621	1.32007e-09	1.31207e-08	0.268654	45.4664
SAMD4A	1.56587	5.99908e-43	3.33666e-41	0.114836	305.405
TDP2	1.56438	1.35176e-07	1.02195e-06	0.313031	26.6758
TUBB6	1.56376	6.72806e-29	2.27751e-27	0.141775	177.231
DYNC1H1	1.56301	1.66493e-85	3.27002e-83	0.0800356	1974.12
CHSY1	1.56084	4.81396e-17	9.01363e-16	0.189695	88.4634
ELL	1.56076	3.13829e-28	1.02552e-26	0.143354	164.969
SETD2	1.55979	4.059e-68	5.35192e-66	0.0898765	502.117
KIF2A	1.5587	3.19718e-24	8.73664e-23	0.155767	128.391
SUCO	1.55811	4.01604e-31	1.49649e-29	0.135607	280.068
HSPA4L	1.55769	1.42981e-23	3.79171e-22	0.157989	216.39
RUNX1	1.55708	1.37143e-37	6.38477e-36	0.122197	256.021
SLC25A38	1.55622	8.09917e-16	1.40617e-14	0.197492	88.0505
SPSB1	1.55481	1.81081e-08	1.55548e-07	0.289429	41.1767
PHLDB3	1.55471	8.46818e-17	1.5669e-15	0.190622	93.9938
ZBTB48	1.55454	9.71999e-14	1.43742e-12	0.213865	85.8292
ATP8	1.55434	2.68082e-20	6.03906e-19	0.171236	98.6336
SPTLC2	1.55282	3.18989e-22	7.89309e-21	0.162556	132.658
ATG3	1.55267	1.49893e-16	2.72539e-15	0.191802	101.306
ZNF547	1.55128	0.00272549	0.00873517	0.631812	9.27995
CEP350	1.55101	1.90197e-75	2.98846e-73	0.0847157	611.808
LRRTM2	1.54761	0.002031	0.00677184	0.598269	7.56466
LOC103238513	1.547	3.57337e-09	3.3404e-08	0.272998	39.8889
LOC103237276	1.54619	0.00087461	0.00322274	0.540052	10.5851
ZNF536	1.54597	2.19463e-21	5.19193e-20	0.165779	128.87
ZNF614	1.54379	1.10885e-09	1.11091e-08	0.263351	46.4175
CENPF	1.5427	3.03071e-61	3.08886e-59	0.0938883	623.305
PHLDA1	1.54223	1.27665e-44	7.40651e-43	0.110776	286.689
WDR78	1.54165	0.00109648	0.00394847	0.551811	11.5596
C15H3orf58	1.54145	4.13278e-10	4.36791e-09	0.255911	58.9956
ST3GAL1	1.54067	9.52073e-32	3.67103e-30	0.132883	194.245
FAM208B	1.53996	7.55087e-31	2.7645e-29	0.134683	225.543
LURAP1L	1.53738	0.00283006	0.00902889	0.629702	11.738
PITX2	1.53684	0.000517575	0.00202215	0.505657	18.5638
HSPA8	1.53682	2.47428e-63	2.68118e-61	0.0919321	801.262
SMURF2	1.53622	6.29344e-22	1.53311e-20	0.162686	137.053
BBC3	1.53467	1.02196e-18	2.12449e-17	0.1769	131.051
AMOTL2	1.53423	8.67436e-73	1.29806e-70	0.085377	940.034
FNDC3A	1.53258	6.11205e-35	2.6073e-33	0.125331	251.181
NR1D2	1.53249	2.90574e-33	1.1657e-31	0.128228	229.493
MLLT4	1.53195	1.4557e-64	1.67361e-62	0.0907289	503.525
FBXO33	1.53142	4.13787e-11	4.858e-10	0.239767	68.2278
MARVELD2	1.5314	5.58527e-05	0.000270581	0.418415	22.4272
RNF19B	1.53124	1.58871e-13	2.29893e-12	0.212707	77.2814
FNBP4	1.53065	7.57921e-43	4.20312e-41	0.112357	298.875
MYO16	1.53013	1.35865e-10	1.51403e-09	0.246772	52.8324
LOC103220070	1.52919	7.58629e-11	8.69013e-10	0.242865	49.7652
LOC103235454	1.52758	0.00297653	0.0094276	0.626566	11.2257
CLTB	1.5267	7.5298e-22	1.82721e-20	0.161287	149.028
BAG1	1.52506	4.61765e-16	8.10668e-15	0.191671	96.1055
RAB3GAP2	1.52491	9.81743e-30	3.4535e-28	0.136084	188.901
DIP2C	1.52491	1.18638e-24	3.30904e-23	0.150894	153.585
FBXO38	1.52463	3.54114e-29	1.2184e-27	0.13734	208.481
SERTAD3	1.52427	1.37901e-10	1.5349e-09	0.245851	69.795
RASA2	1.52391	1.16087e-12	1.58151e-11	0.220025	66.0139
DYRK1A	1.52358	6.15339e-35	2.61901e-33	0.124713	248.86
MARS2	1.52216	6.02011e-06	3.50742e-05	0.359049	29.5378
FOXP2	1.52178	5.79454e-17	1.08067e-15	0.185274	107.923
ITPRIP	1.52156	6.82687e-05	0.000325381	0.421197	24.7127
LOC103245901	1.52034	0.00033657	0.00137987	0.478889	14.8881
BAZ1B	1.51948	6.39534e-82	1.1822e-79	0.0795777	756.628
LRRFIP2	1.51913	1.77112e-26	5.31758e-25	0.144345	162.186
MTHFD2	1.51819	1.7872e-14	2.80346e-13	0.202853	121.603
FOSL2	1.51693	2.8357e-61	2.9217e-59	0.0923045	446.222
AXL	1.51513	7.44538e-70	1.03223e-67	0.08613	604.179
AFF4	1.51296	2.71419e-62	2.8274e-60	0.0912947	712.317
LOC103221021	1.51269	0.00199912	0.00667968	0.585179	11.9583
PPM1G	1.51259	1.19289e-47	7.83689e-46	0.104988	344.85
SEC23B	1.51228	5.08488e-13	7.10189e-12	0.214639	82.085
LOC103241031	1.51186	0.000226331	0.000968121	0.459312	14.797
PPFIA1	1.51167	3.97722e-38	1.88893e-36	0.118033	263.778
LOC103235515	1.51145	2.35472e-07	1.72688e-06	0.308262	48.0248
SLC3A2	1.51136	8.68307e-30	3.06017e-28	0.134733	260.849
HERC4	1.51018	7.79366e-25	2.1835e-23	0.148492	166.298
rna-NC_008066.1:583..656	1.51004	0.000256325	0.00108049	0.463777	15.3691
ND6	1.50992	3.46e-51	2.53846e-49	0.100908	381.435
KIN	1.50925	3.9401e-13	5.56067e-12	0.213301	81.4748
PLEKHM2	1.50883	9.47585e-32	3.66121e-30	0.130145	232.694
NCOA6	1.50864	7.72674e-37	3.50211e-35	0.120008	227.177
LOC103223665	1.50805	0.000296581	0.00122901	0.468476	17.7671
KLHL15	1.50802	2.62211e-09	2.49444e-08	0.263827	59.2642
LOC103226645	1.50747	0.000407403	0.00163264	0.48352	14.0232
KMT2A	1.50661	4.67239e-82	8.72257e-80	0.0788183	886.108
ZNF267	1.50365	4.26809e-11	5.00465e-10	0.235423	62.2153
LOC103234749	1.50359	0.00301438	0.00952985	0.612044	9.12858
BUB1	1.50315	1.55232e-14	2.44316e-13	0.199841	103.047
DGKH	1.50292	2.43122e-06	1.5169e-05	0.340982	41.4098
TRAF3	1.50268	6.8457e-27	2.10908e-25	0.141685	191.852
USP22	1.50203	1.33839e-57	1.19599e-55	0.0944115	444.602
TRNAM-CAU	1.50037	2.94411e-07	2.13663e-06	0.308442	36.0753
SIN3A	1.49977	3.00771e-56	2.50931e-54	0.0954063	452.011
LOC103242316	1.49826	1.95573e-05	0.000103786	0.38047	25.7906
CYTB	1.49753	1.73817e-50	1.24141e-48	0.100807	330.469
RAD54L2	1.49437	2.9765e-24	8.15725e-23	0.14884	164.645
IFNGR2	1.49352	2.10221e-09	2.02644e-08	0.259418	44.3981
FAM83H	1.49328	0.00011524	0.000521319	0.426838	16.2249
LMCD1	1.49282	2.02902e-09	1.96292e-08	0.258919	57.4794
TGFB2	1.49243	2.22399e-21	5.2548e-20	0.158568	150.192
SENP7	1.49155	4.70732e-09	4.34229e-08	0.264919	43.887
DEPDC5	1.49067	7.0401e-36	3.12332e-34	0.120225	263.909
SKIL	1.4905	2.22188e-45	1.31741e-43	0.106075	334.6
BNIP2	1.48889	1.58164e-11	1.92648e-10	0.227944	67.1837
ELAVL1	1.48887	8.05221e-20	1.7654e-18	0.166675	125.153
ATP6V1H	1.48723	4.65498e-14	7.05292e-13	0.201819	93.355
CBL	1.48697	9.39233e-22	2.26172e-20	0.157309	157.394
LOC103227257	1.48645	0.000213443	0.000916737	0.448683	20.5119
FGFR1	1.4844	1.49534e-56	1.27577e-54	0.0942363	449.964
HOXA2	1.48402	1.67397e-09	1.63877e-08	0.256552	56.8424
DNAJA3	1.48359	1.02602e-22	2.60722e-21	0.152941	153.324
KDM4C	1.4833	4.47469e-20	9.94932e-19	0.164261	137.542
TM4SF1	1.48325	7.89933e-31	2.88647e-29	0.129759	194.249
NOTCH2	1.48319	4.75714e-69	6.45294e-67	0.0848138	632.581
ZNF335	1.48189	3.09205e-25	8.79346e-24	0.144613	144.371
LPXN	1.48145	0.000781021	0.00290686	0.507527	15.9325
PARD6A	1.48118	0.00112077	0.00402441	0.530219	13.9927
XPO1	1.48042	2.78515e-45	1.63595e-43	0.105587	347.46
COX2	1.47757	2.41303e-53	1.8495e-51	0.0968388	558.138
GMDS	1.47724	1.11042e-07	8.51093e-07	0.291892	44.5881
CHGA	1.47552	0.00068107	0.00258174	0.496873	13.6941
PPFIA3	1.47476	1.71683e-18	3.51271e-17	0.170861	124.356
NFX1	1.4726	3.41811e-20	7.66332e-19	0.162581	146.602
HOXA1	1.47116	0.000423115	0.00168451	0.470508	15.4805
TDG	1.47076	7.50936e-11	8.61247e-10	0.233232	71.2359
CD83	1.4695	4.73767e-05	0.000233234	0.394356	25.2053
EIF4A2	1.4693	2.09704e-41	1.10446e-39	0.109799	333.847
LOC103244555	1.46917	1.7183e-10	1.88913e-09	0.237954	65.4361
RSF1	1.46873	4.66527e-61	4.70394e-59	0.0895169	479.868
CEP95	1.46803	1.17644e-15	2.02574e-14	0.187199	105.412
CD3EAP	1.46724	2.77206e-13	3.95065e-12	0.206052	86.2531
LOC103221585	1.46501	0.000186988	0.000813489	0.435932	17.857
QKI	1.46495	1.22877e-14	1.95349e-13	0.194231	94.8032
C1H11orf84	1.46442	8.48792e-19	1.76839e-17	0.168224	111.416
ZNF593	1.46388	0.000137934	0.00061527	0.424997	17.2181
DDX20	1.46258	1.64318e-11	1.99627e-10	0.223475	84.2837
EEF2	1.46189	8.66409e-59	8.08719e-57	0.0908825	1194.89
KDM6B	1.46078	5.85026e-65	6.98143e-63	0.0862361	719.074
ZNF622	1.46011	1.25483e-14	1.99324e-13	0.193628	106.841
GTF2H4	1.45994	8.35868e-09	7.47997e-08	0.263849	46.9435
rna-NC_008066.1:14659..14727	1.4589	1.35817e-05	7.45078e-05	0.361661	27.1395
HMGXB3	1.45816	1.67206e-30	6.07451e-29	0.128299	232.742
LOC103222006	1.45673	1.24951e-23	3.33232e-22	0.147243	213.422
ETS1	1.4553	1.01564e-40	5.23223e-39	0.109623	371.933
IER2	1.45445	3.09867e-41	1.62293e-39	0.108932	314.621
OLA1	1.45439	7.73926e-19	1.61958e-17	0.166914	138.053
PIK3C2A	1.45395	2.27865e-43	1.28251e-41	0.106245	325.642
CASC5	1.45369	2.16331e-09	2.0779e-08	0.251974	52.5246
BCAR3	1.4528	3.01155e-15	5.03394e-14	0.188014	94.8922
ARHGAP17	1.45244	7.74865e-26	2.25813e-24	0.139839	204.716
C19H22orf15	1.45133	0.00175646	0.00595436	0.546109	12.2945
LOC103246585	1.45041	1.57805e-08	1.36989e-07	0.267351	44.8252
H3F3B	1.44988	2.89347e-43	1.6237e-41	0.105849	343.825
TANC2	1.44951	2.1487e-48	1.43158e-46	0.0998135	386.807
LARP1B	1.4483	7.54183e-11	8.64445e-10	0.229268	76.3889
ZNF385A	1.44764	9.60425e-13	1.31414e-11	0.208334	71.4256
PEA15	1.44598	1.7948e-15	3.03234e-14	0.1856	127.802
ASXL3	1.44567	0.00218302	0.00721108	0.559243	11.3926
ATP6	1.44468	2.12327e-49	1.45579e-47	0.0983375	354.416
ZNF778	1.44436	3.1383e-16	5.59817e-15	0.180291	117.491
RAD54B	1.44359	0.000168671	0.000740465	0.424562	24.0575
NPR2	1.44293	7.75316e-11	8.87588e-10	0.22791	61.7072
WAC	1.44244	5.2137e-54	4.06216e-52	0.0937055	442.178
MTF2	1.44233	3.2903e-16	5.8527e-15	0.180129	110.853
RAB30	1.44176	4.90481e-05	0.000240834	0.386976	32.1141
CHD9	1.44106	2.4786e-50	1.75034e-48	0.0971004	475.109
SHOX2	1.44061	2.94516e-07	2.13663e-06	0.297744	36.051
SLC43A3	1.44029	0.00233627	0.00764765	0.558072	11.1553
KMT2B	1.44015	2.02379e-47	1.31129e-45	0.0995113	432.347
GATAD2A	1.43992	6.22583e-41	3.23383e-39	0.108248	318.313
SRFBP1	1.43992	6.09087e-10	6.31354e-09	0.240828	60.8173
LOC103231005	1.43918	3.75111e-05	0.000188656	0.379415	27.8245
ND4	1.43867	2.93022e-48	1.9454e-46	0.0991406	405.322
LOC103243846	1.43862	0.000526592	0.0020528	0.470181	19.4799
ZNF202	1.43485	2.07259e-07	1.5295e-06	0.290085	44.5869
C22H3orf38	1.43478	8.27494e-07	5.5921e-06	0.307262	46.7784
HMGCS1	1.4332	2.05694e-13	2.95832e-12	0.200067	90.678
RUNDC3A	1.43289	0.00193164	0.00648753	0.541172	16.2785
ATP13A3	1.43157	3.02268e-61	3.08886e-59	0.0870898	649.517
AGPAT5	1.42922	4.28882e-18	8.53915e-17	0.167627	137.031
CNKSR3	1.42826	1.4312e-08	1.24586e-07	0.262675	56.3318
COX1	1.42682	4.86929e-63	5.2165e-61	0.0854906	865.205
INPP5D	1.42658	0.000624929	0.00239639	0.472664	14.351
LOC103221970	1.42536	1.60396e-13	2.31923e-12	0.197968	111.335
SPRED1	1.42525	4.04604e-17	7.62119e-16	0.172991	117.619
CREB1	1.42384	5.78829e-28	1.86881e-26	0.131392	208.923
ZNF562	1.4227	8.50877e-07	5.73384e-06	0.304888	44.5007
LOC103222879	1.42257	2.56963e-05	0.000133084	0.36515	27.5864
TSC1	1.42234	3.05665e-30	1.09569e-28	0.125738	291.256
ND1	1.42202	2.21092e-29	7.67715e-28	0.12757	172.743
LOC103231580	1.42197	0.000381708	0.00154048	0.44796	15.4588
FXR2	1.42143	2.72244e-23	7.10965e-22	0.144837	163.464
ARAP2	1.42063	3.02388e-20	6.79563e-19	0.156285	146.043
BAIAP2	1.42024	3.90822e-16	6.9192e-15	0.177844	126.195
ND5	1.41959	1.15548e-66	1.43333e-64	0.0825065	1097.52
LOC103246030	1.41946	1.76868e-06	1.13084e-05	0.31465	33.8227
FAM160B1	1.41907	6.05447e-14	9.09618e-13	0.193179	95.64
FOSB	1.4187	6.87504e-46	4.22244e-44	0.100362	344.652
PHF2	1.4169	1.08169e-20	2.48118e-19	0.154028	134.087
WDR74	1.41684	7.78458e-13	1.07373e-11	0.202647	80.4945
USP15	1.41543	7.57025e-18	1.48684e-16	0.16623	131.372
MCU	1.41512	6.82006e-14	1.01976e-12	0.193092	98.842
PBX3	1.41498	1.6873e-07	1.26096e-06	0.283523	48.1215
C6H19orf24	1.41485	1.03039e-08	9.17711e-08	0.257032	48.7038
ZNF787	1.41431	3.55086e-17	6.72204e-16	0.170897	102.376
ZFP36	1.41368	8.18958e-21	1.88311e-19	0.153288	150.938
NOP58	1.41277	3.16892e-29	1.09432e-27	0.12697	252.963
LEMD3	1.41174	1.52371e-17	2.94964e-16	0.167752	131.033
LOC103216190	1.41156	1.18712e-08	1.04888e-07	0.257456	65.3376
NUFIP1	1.40927	0.0018014	0.00608699	0.527469	16.8902
NT5DC3	1.40916	4.08079e-12	5.26648e-11	0.208811	75.4993
APAF1	1.40818	4.06355e-16	7.17399e-15	0.176416	103.952
ATG101	1.4075	2.25959e-11	2.71194e-10	0.216594	77.0697
MORC3	1.40735	4.0119e-17	7.56444e-16	0.170143	125.245
CLIP2	1.40561	2.03229e-20	4.60009e-19	0.154085	161.516
PVR	1.4047	4.50397e-09	4.16082e-08	0.248765	62.3728
PPP4R1	1.40354	1.05419e-28	3.53051e-27	0.127491	217.665
CCAR1	1.40321	7.2325e-41	3.74639e-39	0.105508	341.86
TGIF2	1.40301	6.98342e-08	5.5024e-07	0.272207	60.4273
SLC22A8	1.40293	6.90972e-05	0.00032908	0.384671	21.4157
ARID1A	1.40243	2.81419e-53	2.14824e-51	0.091771	638.67
PALLD	1.40237	1.69102e-09	1.65288e-08	0.241022	92.915
BZW2	1.40121	2.98731e-13	4.2414e-12	0.196526	95.6112
CHIC2	1.40027	7.97675e-06	4.55292e-05	0.335219	37.5877
RELB	1.39979	1.28068e-12	1.73846e-11	0.202133	95.0235
GTF3A	1.39957	9.15652e-07	6.149e-06	0.30123	35.8766
INO80	1.3981	3.17451e-26	9.42604e-25	0.133396	188.006
ROR2	1.39759	6.71966e-18	1.32116e-16	0.164965	120.417
PRICKLE1	1.39748	4.05595e-07	2.87716e-06	0.290792	41.374
STK38L	1.39716	7.33184e-13	1.0135e-11	0.199572	88.5768
VCPKMT	1.39705	0.00117693	0.00420038	0.49358	14.6901
SHOC2	1.39698	2.06017e-17	3.95969e-16	0.167324	118.063
SERTAD1	1.39593	6.42418e-08	5.10013e-07	0.26959	59.167
NAA15	1.39507	1.00686e-27	3.21225e-26	0.129115	222.908
LOC103225754	1.39506	1.79072e-05	9.59479e-05	0.350362	35.7376
RNF138	1.39439	7.16236e-08	5.63632e-07	0.270643	48.0595
RRM2B	1.3915	1.17037e-10	1.31354e-09	0.222655	57.0038
EGFR	1.39123	4.93602e-26	1.44967e-24	0.133333	218.681
ND4L	1.39065	1.59894e-21	3.80657e-20	0.147841	130.448
CLK4	1.39038	3.09363e-12	4.03392e-11	0.204798	95.901
GEMIN4	1.38993	2.58986e-08	2.1732e-07	0.259713	54.3717
LOC103233780	1.3891	0.00312152	0.00981919	0.561245	13.3246
FLII	1.38838	3.75174e-55	3.04909e-53	0.089206	650.931
AXIN1	1.38548	4.11225e-24	1.11885e-22	0.138455	178.073
PCGF2	1.38491	1.55493e-31	5.93487e-30	0.119613	246.095
BIRC5	1.38391	2.34618e-12	3.09135e-11	0.202292	96.1299
FOXJ3	1.38331	2.26814e-28	7.45083e-27	0.126501	258.09
MARCH6	1.38308	8.04841e-32	3.12249e-30	0.118866	251.478
ACBD3	1.38285	6.37505e-32	2.48865e-30	0.118624	244.805
LOC103246243	1.38202	2.14309e-07	1.5772e-06	0.279289	42.665
NFYB	1.38141	3.41707e-09	3.20064e-08	0.242189	59.271
MN1	1.3814	6.62227e-05	0.000316349	0.377018	26.7194
AMPD3	1.38066	0.00145376	0.00505733	0.497422	14.0532
SRSF3	1.38043	1.23047e-24	3.42696e-23	0.136338	188.223
PHF13	1.3788	8.17766e-12	1.02452e-10	0.207281	101.802
RBM15	1.37787	2.73073e-25	7.78941e-24	0.134288	211.324
SERPINC1	1.37781	0.000663223	0.00251915	0.455639	17.7647
DST	1.37731	4.25119e-54	3.33984e-52	0.0893061	2615.52
E2F4	1.37723	3.8621e-20	8.63818e-19	0.151978	140.868
FKBP5	1.37654	2.41956e-06	1.51062e-05	0.308755	46.2736
DDIT4	1.37647	1.68809e-22	4.24386e-21	0.142859	240.227
DPYSL2	1.37591	4.17577e-12	5.38169e-11	0.203863	76.9249
LOC103222001	1.37404	2.21372e-09	2.122e-08	0.237856	78.8366
ND2	1.37218	1.73123e-58	1.59231e-56	0.0855003	628.956
SLC30A1	1.37186	2.83724e-24	7.79828e-23	0.136489	212.334
CDC14A	1.37179	1.31303e-13	1.91174e-12	0.189178	105.346
SUV39H2	1.37138	1.82921e-06	1.16677e-05	0.303659	47.3845
CEP135	1.37002	1.76986e-07	1.31744e-06	0.274655	45.3952
TRNAG-CCC	1.36927	4.12366e-05	0.000205529	0.361143	23.3157
MED13L	1.36792	9.20832e-52	6.83555e-50	0.0908304	488.704
RSPRY1	1.36749	1.14509e-14	1.82662e-13	0.180903	101.139
KLHL11	1.36676	1.44574e-09	1.43019e-08	0.233699	67.9065
MEX3D	1.36282	1.31412e-12	1.78257e-11	0.197033	102.888
ILF3	1.36116	3.46094e-52	2.61024e-50	0.0900018	504.169
SFMBT1	1.36049	8.82437e-12	1.09969e-10	0.204407	80.0793
RPSA	1.36049	3.03364e-29	1.04953e-27	0.122348	247.073
TRMT6	1.35998	5.0109e-06	2.9627e-05	0.316677	29.6912
IARS	1.35983	2.75336e-27	8.62368e-26	0.127102	277.957
CLTCL1	1.35898	3.97984e-05	0.000199045	0.358115	21.8439
RSRP1	1.35873	7.27272e-20	1.59822e-18	0.150601	154.524
SPATA2	1.3585	3.69707e-12	4.79094e-11	0.200495	84.073
RB1CC1	1.35728	6.06863e-35	2.59465e-33	0.110922	325.437
AP1S3	1.35629	0.00272249	0.0087281	0.533218	12.4298
ALYREF	1.35595	1.07738e-15	1.85856e-14	0.172274	122.571
COQ10B	1.35578	3.31748e-08	2.73986e-07	0.255539	43.5438
DHX33	1.35428	7.62072e-07	5.17797e-06	0.288376	48.944
CTPS1	1.35416	4.41045e-14	6.71179e-13	0.183174	126.304
PPP2R2A	1.35339	3.96662e-16	7.00943e-15	0.170565	132.94
LOC103222706	1.35329	1.37364e-08	1.19852e-07	0.247704	61.4913
TBC1D31	1.35286	9.45409e-09	8.44419e-08	0.244344	63.8478
TNXB	1.35252	7.56139e-21	1.74504e-19	0.146314	132.542
LOC103245450	1.35194	0.000442379	0.00175343	0.428646	16.9132
EPAS1	1.35171	6.17008e-06	3.58843e-05	0.317941	31.6991
ZFAND5	1.35137	5.85792e-31	2.15304e-29	0.117804	294.064
CDC6	1.34978	2.02452e-11	2.43756e-10	0.206498	93.3914
MIER1	1.3485	6.55352e-28	2.10505e-26	0.124326	221.66
OTUD4	1.34844	9.39485e-34	3.85087e-32	0.112242	300.141
TXLNG	1.34833	9.30486e-17	1.71499e-15	0.164982	124.618
OTUB2	1.34694	1.86949e-14	2.92525e-13	0.179302	117.538
PIDD1	1.34563	3.36789e-07	2.41727e-06	0.276421	34.4479
CCER2	1.34538	9.85193e-05	0.000453954	0.375166	19.7304
GPATCH8	1.34486	8.881e-38	4.17584e-36	0.10538	396.338
SPECC1	1.34399	4.52467e-19	9.57494e-18	0.153021	151.356
SENP3	1.34342	4.51823e-14	6.8592e-13	0.181813	103.376
RPLP1	1.34326	4.14607e-23	1.07235e-21	0.13733	193.652
KIF5B	1.34098	3.46051e-57	3.02073e-55	0.084517	612.106
CSTF3	1.3393	3.82506e-06	2.31456e-05	0.306543	36.6047
SAFB2	1.33817	1.33699e-27	4.25108e-26	0.124143	200.055
NAMPT	1.33702	1.04846e-13	1.54564e-12	0.183581	99.5117
MDN1	1.33555	5.3345e-40	2.68936e-38	0.101574	423.484
NFKBIB	1.33551	0.000116714	0.000527607	0.377905	26.5229
ADARB1	1.33527	1.2685e-16	2.31535e-15	0.164154	136.601
LOC103234361	1.33482	0.00169976	0.00578815	0.489413	15.1983
MEX3B	1.33304	0.00219602	0.0072512	0.507281	17.8015
KIF3C	1.33205	1.27583e-21	3.05664e-20	0.141311	167.665
THBS1	1.33183	5.34452e-20	1.18415e-18	0.147497	183.299
RAB31	1.32741	0.000981064	0.00357696	0.456829	18.6818
CDK11B	1.3269	4.87951e-38	2.31164e-36	0.103576	313.469
PFKFB2	1.32618	1.58549e-09	1.55619e-08	0.226129	69.6106
SCYL1	1.32537	4.15461e-26	1.22399e-24	0.126715	211.49
CHD5	1.32529	2.01349e-11	2.42583e-10	0.202971	84.2228
RAPGEF2	1.3242	6.72453e-32	2.61965e-30	0.113502	294.272
ACLY	1.32349	1.64888e-55	1.35762e-53	0.0847172	730.731
DNA2	1.32166	1.91486e-06	1.21811e-05	0.293002	35.2082
CDH2	1.32078	1.52198e-33	6.18467e-32	0.110297	333.91
NFASC	1.32005	1.01911e-09	1.02645e-08	0.223201	93.6374
C5H16orf72	1.31902	4.60472e-24	1.25104e-22	0.13194	223.033
ZNF121	1.31898	3.20069e-07	2.30646e-06	0.269803	49.9679
LOC103222003	1.31649	3.5974e-11	4.23401e-10	0.20401	107.115
USP9X	1.31616	3.61977e-65	4.37505e-63	0.0775148	1089.16
PUM2	1.316	3.94014e-37	1.80319e-35	0.104084	373.325
TRIP10	1.31504	5.6611e-24	1.52704e-22	0.131971	195.92
LRP12	1.31475	3.46676e-14	5.30567e-13	0.17695	111.852
SPTY2D1	1.31449	1.58554e-20	3.61054e-19	0.14342	164.963
LOC103237988	1.31293	5.39999e-29	1.84451e-27	0.118549	257.484
HS3ST3A1	1.31285	4.95157e-12	6.33821e-11	0.19474	91.6562
ZNF654	1.31269	3.35344e-11	3.96669e-10	0.203131	79.2247
DDX10	1.31216	3.82704e-19	8.11686e-18	0.14886	180.83
LUZP1	1.31124	3.12888e-28	1.02422e-26	0.120147	262.98
PTRF	1.31054	4.44329e-49	3.0028e-47	0.089463	713.996
ZC3H12C	1.31009	1.56608e-11	1.90875e-10	0.199269	91.8929
INO80D	1.3084	2.99103e-31	1.12792e-29	0.113448	275.416
BACE2	1.30834	7.79388e-13	1.07422e-11	0.186751	103.572
DENND5B	1.30799	2.3527e-26	7.01902e-25	0.124348	234.583
COX3	1.30797	7.17134e-35	3.03855e-33	0.106924	292.945
LOC103221944	1.30653	5.63515e-11	6.5506e-10	0.204805	116.214
TBC1D9	1.30555	1.989e-12	2.65036e-11	0.189902	96.3838
FAM193A	1.30512	5.37401e-31	1.9868e-29	0.113636	292.513
ALKBH8	1.30462	1.56349e-05	8.47658e-05	0.321908	26.9419
GART	1.30394	1.64191e-15	2.78402e-14	0.167488	139.229
NDUFAF6	1.30358	0.000694267	0.00262649	0.429529	17.0692
MRPL18	1.30309	0.000506121	0.00198233	0.417217	29.2275
PLCB1	1.30176	0.00150969	0.00522874	0.468015	18.0618
ZNF627	1.29967	7.97817e-06	4.55292e-05	0.308689	42.1462
MAST2	1.29907	9.69802e-27	2.94929e-25	0.122479	287.032
DLC1	1.29905	1.37777e-15	2.34951e-14	0.165118	130.639
CCT4	1.29642	2.50019e-23	6.54737e-22	0.131746	239.029
CREBRF	1.29597	6.95074e-29	2.34868e-27	0.117189	247.595
DHX9	1.29571	1.13444e-43	6.4427e-42	0.0940766	481.04
AMDHD2	1.29521	1.78204e-08	1.53286e-07	0.238366	61.3409
ABHD17C	1.29329	4.43458e-08	3.61028e-07	0.24536	52.5273
SP6	1.293	0.000307429	0.00127007	0.394372	19.0566
SLC35B2	1.29298	1.07145e-16	1.96711e-15	0.158385	121.739
LOC103222374	1.29142	8.59266e-16	1.49047e-14	0.16314	181.85
CSNK2A2	1.29136	1.43497e-18	2.95054e-17	0.148923	141.289
MPRIP	1.29106	1.58468e-50	1.13609e-48	0.0868102	513.638
ASXL1	1.29089	1.27724e-37	5.96098e-36	0.101349	396.094
LRRC75A	1.28933	0.00316002	0.00993035	0.50895	15.1297
UBA6	1.28892	1.87487e-12	2.50536e-11	0.187247	97.3032
KIF23	1.28883	3.15225e-09	2.96585e-08	0.224672	76.9361
FAS	1.28841	1.02583e-05	5.75311e-05	0.310337	33.1421
SETD1A	1.2879	1.54903e-38	7.43182e-37	0.099869	345.839
TJP1	1.28751	3.1078e-38	1.47974e-36	0.100277	408.271
GLTSCR1	1.28722	1.28669e-14	2.0387e-13	0.170278	110.784
LOC103222018	1.28463	5.35518e-12	6.81782e-11	0.190812	129.999
CPEB4	1.2845	4.49891e-29	1.54231e-27	0.116369	289.762
FAM118B	1.2843	0.000591256	0.00228352	0.415475	20.8659
MAML2	1.28373	6.45846e-09	5.87147e-08	0.228467	61.549
SFPQ	1.28337	2.99976e-46	1.9044e-44	0.0903729	569.513
DUSP14	1.28247	1.77471e-06	1.13431e-05	0.282824	47.9987
CLASP2	1.2821	1.09286e-18	2.26189e-17	0.147359	169.805
TLK2	1.28163	4.02276e-28	1.30774e-26	0.117648	286.108
MAFF	1.28144	4.66064e-16	8.16694e-15	0.160477	137.44
EZH2	1.27978	2.80866e-14	4.32658e-13	0.17147	126.223
HMMR	1.27923	1.07912e-07	8.28117e-07	0.25066	53.9504
TRNAK-CUU	1.27905	2.35122e-05	0.00012277	0.32275	27.8554
FAM131A	1.27826	7.33236e-08	5.75809e-07	0.246933	54.227
POLQ	1.2775	2.77256e-08	2.32031e-07	0.239208	57.552
RFC4	1.27748	3.19111e-05	0.000162442	0.328014	30.0324
ZNF574	1.27706	3.61595e-13	5.12237e-12	0.179394	121.077
RPL21	1.27701	2.60652e-08	2.1862e-07	0.237879	59.4385
SUPT3H	1.27656	8.46004e-07	5.70304e-06	0.271738	38.5419
HES1	1.27615	6.67212e-15	1.08171e-13	0.165971	146.361
ZNF330	1.27549	1.76738e-07	1.31611e-06	0.254407	59.0021
PARD3	1.27483	3.46256e-37	1.58848e-35	0.100708	408.919
FOXO3	1.27419	1.16025e-40	5.9609e-39	0.0959947	459.131
MMD	1.27255	7.60907e-08	5.95801e-07	0.246165	58.6268
LOC103231992	1.27255	0.00155202	0.00535077	0.456541	14.9709
ZNF746	1.2719	6.20325e-14	9.30488e-13	0.172496	124.873
GMEB2	1.27071	3.27528e-15	5.45062e-14	0.164501	125.098
RUSC2	1.27064	1.96737e-21	4.66601e-20	0.135385	171.563
XPO5	1.27036	1.07765e-18	2.23532e-17	0.145954	178.558
BAZ2B	1.26891	2.18082e-31	8.29019e-30	0.109724	319.757
SMC4	1.2685	7.26762e-30	2.57094e-28	0.112618	287.545
TNKS2	1.26802	8.70156e-27	2.65912e-25	0.119451	231.187
CDC27	1.26775	2.22966e-25	6.38909e-24	0.122962	224.709
OTUD3	1.26677	2.6589e-12	3.48634e-11	0.185724	119.771
CEBPZ	1.26597	3.3502e-17	6.34855e-16	0.152356	144.116
LOC103237237	1.26562	0.000204297	0.00088167	0.371723	22.8661
NDFIP2	1.26536	1.34756e-23	3.58873e-22	0.127687	229.496
DNTTIP2	1.26427	1.32074e-19	2.87228e-18	0.141086	166.085
RASSF3	1.26342	1.47862e-15	2.51619e-14	0.161163	125.904
C18H18orf8	1.26325	8.29009e-08	6.45641e-07	0.245064	71.3501
UHRF1	1.26265	1.64742e-16	2.98386e-15	0.155738	136.783
NUPL2	1.26254	0.00020959	0.00090183	0.371605	29.3766
HKDC1	1.262	8.74949e-55	7.05007e-53	0.0813016	688.325
RFX7	1.26056	1.74543e-26	5.24881e-25	0.119466	230.549
SMNDC1	1.26046	1.46427e-09	1.44776e-08	0.214418	77.3494
HSD17B7	1.26043	1.08312e-05	6.04388e-05	0.304035	41.3895
LOC103221993	1.26004	6.14462e-06	3.57472e-05	0.294601	49.4757
TRNAL-UAG	1.25956	2.79501e-06	1.72787e-05	0.282908	37.1657
DAXX	1.25873	2.83242e-19	6.04817e-18	0.142211	165.89
TCP1	1.2571	1.48022e-12	1.99354e-11	0.181555	129.911
REM2	1.25655	0.00156792	0.00539591	0.450205	15.2026
CSMD2	1.25633	0.000635152	0.00242966	0.408753	22.7546
YES1	1.25608	5.48435e-18	1.08394e-16	0.147427	164.665
MASTL	1.25607	4.88109e-05	0.000239794	0.330931	30.6252
DNAJB4	1.25606	1.65227e-09	1.61836e-08	0.213009	98.5752
CHD4	1.25534	1.12123e-56	9.60949e-55	0.0794399	865.625
NFKB1	1.25532	1.64383e-15	2.78476e-14	0.160042	145.48
PIEZO1	1.25509	1.47254e-29	5.16073e-28	0.112093	303.711
ANLN	1.25447	1.10918e-23	2.96226e-22	0.126362	315.991
FOXA1	1.25433	0.00161549	0.00553316	0.449487	18.7505
FRAT2	1.25375	0.00265033	0.00853056	0.479477	14.7254
CRTC2	1.25369	1.23106e-17	2.3979e-16	0.148807	140.307
AGPAT9	1.25348	1.31145e-08	1.15011e-07	0.227782	69.77
TULP4	1.25094	4.26844e-18	8.50755e-17	0.146432	173.855
ZNF207	1.2504	1.7073e-27	5.40121e-26	0.116117	240.058
EIF4B	1.25026	4.8177e-55	3.89862e-53	0.0803698	895.201
UTRN	1.24864	1.69127e-51	1.25054e-49	0.0831059	814.697
RAF1	1.24818	1.56163e-16	2.83121e-15	0.153493	133.895
FAM90A1	1.24816	0.00286204	0.00911397	0.484921	23.6508
SPRED2	1.2479	6.96104e-23	1.78329e-21	0.128055	222.813
TAF3	1.2462	2.92068e-16	5.21985e-15	0.154868	143.92
C11H12orf49	1.24594	5.90924e-08	4.71514e-07	0.238513	64.1618
DGKA	1.24581	5.98612e-10	6.21522e-09	0.20687	70.3032
LOC103238262	1.24581	2.63617e-15	4.43003e-14	0.160209	141.529
ARL4C	1.2458	7.99283e-28	2.55866e-26	0.114935	250.035
TRNAA-UGC	1.24535	0.0014307	0.00498629	0.44041	17.9634
LEKR1	1.24522	0.000344004	0.00140546	0.380812	22.0085
TRIM26	1.24476	9.99945e-17	1.83941e-15	0.152331	143.719
DUSP6	1.24454	1.76736e-07	1.31611e-06	0.248009	61.446
LOC103244493	1.24372	0.000328831	0.00135197	0.37954	30.9022
LOC103232182	1.24262	6.81722e-08	5.39419e-07	0.238991	59.2586
ARPC5L	1.24245	1.17194e-05	6.49911e-05	0.300898	35.8843
RPUSD2	1.24197	0.000392468	0.00157984	0.383979	22.7939
AGFG1	1.24135	5.69343e-18	1.1229e-16	0.145762	167.76
SLC22A15	1.23993	0.000612734	0.00235755	0.400075	23.562
ZNF200	1.23993	1.52885e-07	1.148e-06	0.24565	53.8206
SRSF7	1.23971	4.11276e-14	6.26383e-13	0.167092	132.526
CCT5	1.23877	4.09406e-23	1.06181e-21	0.12645	236.045
LOC103240161	1.23868	2.63084e-06	1.6328e-05	0.277047	40.1562
CAMKK1	1.23865	3.88526e-07	2.76649e-06	0.254683	61.5295
MTA1	1.23863	2.14727e-28	7.07812e-27	0.113036	267.948
ENTPD7	1.23796	9.62069e-11	1.09055e-09	0.196097	91.998
SELPLG	1.23774	9.27396e-11	1.05274e-09	0.196011	93.6282
MARK3	1.23688	3.46915e-13	4.91811e-12	0.17339	129.561
SDAD1	1.23658	7.03126e-11	8.08874e-10	0.194394	90.1252
MAP7D1	1.23636	8.01435e-34	3.30658e-32	0.102655	369.386
SLC1A5	1.23603	0.000131163	0.000587848	0.350071	41.0832
USP6NL	1.23599	1.93155e-16	3.48511e-15	0.152785	167.634
LATS2	1.23596	3.20878e-25	9.09797e-24	0.120281	255.986
RPL11	1.23532	5.76694e-20	1.27474e-18	0.1367	174.878
ZBTB18	1.23525	1.35535e-13	1.97033e-12	0.170023	131.622
HERC1	1.23512	3.36689e-39	1.65751e-37	0.0948321	508.532
PPP2R2C	1.2351	7.33302e-07	4.99329e-06	0.260724	49.0799
LYST	1.23509	8.23959e-18	1.61662e-16	0.145704	161.663
AP1G1	1.23508	4.20652e-28	1.36513e-26	0.113303	282.81
SUPT6H	1.23484	1.19328e-41	6.35574e-40	0.0918751	457.472
RRP8	1.23463	8.03775e-07	5.43788e-06	0.261902	52.8392
RANBP2	1.23342	4.88805e-45	2.85338e-43	0.0879805	639.721
CKAP5	1.2329	5.55948e-33	2.21615e-31	0.103783	431.77
IKZF5	1.23267	1.67575e-08	1.44605e-07	0.225874	57.3562
ERCC6L	1.23235	0.000102684	0.000470384	0.342081	32.0708
UBB	1.23126	8.81296e-27	2.68881e-25	0.116051	302.157
ANKRD11	1.23121	5.13682e-51	3.73957e-49	0.0823136	630.136
FAM188A	1.22837	1.95501e-06	1.24155e-05	0.270764	43.4044
SNRK	1.22817	2.08848e-12	2.76922e-11	0.178626	103.26
TNFRSF1A	1.2274	2.69868e-21	6.36842e-20	0.131033	197.451
VARS	1.2259	8.18553e-21	1.88311e-19	0.132655	206.114
CEP78	1.22493	0.000118877	0.00053674	0.343421	28.7556
SOWAHC	1.22483	5.30759e-12	6.76637e-11	0.181456	140.842
NOL10	1.22376	1.63726e-08	1.41608e-07	0.224066	64.1785
CBLB	1.22318	3.66474e-22	9.0207e-21	0.127757	213.848
AHCTF1	1.22205	1.37262e-42	7.50169e-41	0.0898306	486.798
EIF4G1	1.22105	6.16983e-46	3.82671e-44	0.0862306	905.966
PRPF6	1.22007	1.5387e-23	4.07476e-22	0.123266	229.973
MAP1B	1.21964	1.74904e-58	1.60088e-56	0.075918	1175.36
GTF3C4	1.21937	4.16705e-12	5.37413e-11	0.179767	129.964
ACSL4	1.21923	2.85384e-11	3.40134e-10	0.187619	92.2465
NACC1	1.21919	4.52588e-28	1.46625e-26	0.111961	281.979
RBM33	1.21887	3.94641e-41	2.05551e-39	0.0912555	485.122
C16H17orf53	1.2187	1.4698e-05	8.01651e-05	0.297733	33.5179
FILIP1L	1.21853	4.08455e-09	3.78448e-08	0.213448	77.9964
ARL15	1.21841	5.3331e-05	0.000259298	0.322693	28.7793
TTC9	1.21799	1.51327e-06	9.82192e-06	0.265045	58.2185
SEC14L1	1.21757	1.24873e-18	2.5732e-17	0.140007	171.062
GJC1	1.21681	1.41234e-12	1.9062e-11	0.175329	106.776
PDE1C	1.21591	2.46962e-07	1.80693e-06	0.245284	60.3815
CDC37	1.21575	9.6187e-22	2.31327e-20	0.128282	211.405
ALAS1	1.21345	1.11981e-11	1.37911e-10	0.182751	96.0737
ZBTB21	1.21336	1.62441e-11	1.97474e-10	0.184886	115.847
NKAIN1	1.21288	0.000777409	0.00289627	0.399278	19.1049
PAPD7	1.21271	3.33811e-17	6.33199e-16	0.145852	174.402
SETBP1	1.2122	5.57953e-10	5.81548e-09	0.201101	83.4238
SOCS5	1.21215	1.90636e-13	2.74594e-12	0.167883	142.508
HIC2	1.21121	6.95613e-15	1.12582e-13	0.158074	187.023
ZNF827	1.20926	3.99716e-26	1.18129e-24	0.115401	256.549
ZNF462	1.20893	3.14448e-33	1.25879e-31	0.101317	399.509
CDC25C	1.20884	0.000267165	0.00112017	0.360794	33.0203
DDX3X	1.20883	1.74586e-37	8.10794e-36	0.0950169	697.529
ZNF655	1.20501	1.66288e-25	4.77951e-24	0.116525	253.141
FAM135A	1.20417	4.56103e-08	3.70522e-07	0.228103	61.7505
RYBP	1.20408	1.11726e-11	1.37685e-10	0.181287	105.818
PTPRH	1.20302	7.83734e-09	7.04017e-08	0.214906	75.6367
TADA3	1.20278	1.91372e-14	2.98949e-13	0.159827	114.743
SF1	1.20106	9.49142e-36	4.18133e-34	0.0968586	444.517
NEDD4	1.20072	6.61512e-17	1.22885e-15	0.145722	166.475
ZNF250	1.2006	2.07109e-07	1.52899e-06	0.240177	55.6062
E2F5	1.20028	0.000499696	0.0019592	0.377749	23.1331
ARHGAP40	1.1996	0.00015212	0.000672658	0.341245	28.7903
LOC103243382	1.19791	0.000331291	0.00136089	0.363437	27.5137
MIDN	1.19765	1.69863e-33	6.88767e-32	0.0999876	349.274
LARP4B	1.19725	1.35851e-24	3.77241e-23	0.117993	244.054
CRAMP1L	1.19702	2.71258e-18	5.47012e-17	0.138939	190.072
CHAF1A	1.19702	9.79943e-16	1.69668e-14	0.151382	152.68
ORAOV1	1.19658	0.00260261	0.00839558	0.453322	20.7046
ZBTB46	1.19603	1.25893e-10	1.40873e-09	0.190525	81.9836
C28H7orf43	1.19592	1.49169e-09	1.47333e-08	0.203491	96.1849
LOC103216795	1.19588	0.00113247	0.00406099	0.41012	28.6064
MAP2K4	1.19583	3.40361e-08	2.80854e-07	0.223387	70.4464
PHF12	1.19581	8.28692e-24	2.22262e-22	0.120004	271.579
CTNNAL1	1.1956	6.18417e-13	8.58689e-12	0.169551	129.571
GPD2	1.19547	2.30963e-06	1.44823e-05	0.264761	49.9118
ITSN2	1.1953	1.86909e-18	3.8099e-17	0.1382	172.235
DRP2	1.19444	0.000643971	0.00245875	0.38552	22.1073
SIAH2	1.19345	3.91951e-05	0.000196445	0.308894	42.9022
ANKRD17	1.19197	3.83177e-46	2.42443e-44	0.0839663	633.197
SERAC1	1.19189	2.43922e-05	0.000127084	0.299281	44.9492
PAG1	1.19151	5.90436e-08	4.71324e-07	0.22735	60.0317
LOC103240400	1.19135	5.73155e-07	3.97749e-06	0.248042	51.0098
[truncated: 2,368 more rows]

## Sheet: B.1.351_vs_NonInfectedVero
gene	log2FoldChange	pvalue	padj	lfcSE	baseMean
LOC103237006	9.38884	1.52974e-10	1.00046e-09	2.53092	26.2954
LOC103214891	8.95173	1.52999e-09	9.10894e-09	2.55756	11.4157
NLRP12	8.94801	1.22906e-09	7.38257e-09	2.54283	15.0193
FRMD1	8.93249	2.92268e-09	1.68601e-08	2.66824	9.7755
LOC103233846	8.60403	7.13017e-09	3.92295e-08	2.54979	9.35715
LOC103215046	8.55257	8.8671e-09	4.83346e-08	2.53615	9.19941
ARC	8.48888	3.04435e-10	1.93661e-09	1.25973	49.4041
LOC103235563	8.24878	1.14645e-08	6.16554e-08	2.43012	19.2682
SNX31	7.95615	4.44082e-08	2.22925e-07	2.44068	11.838
SNTG1	7.89148	1.53707e-07	7.24175e-07	2.54591	5.60389
RASSF10	7.81469	7.81605e-08	3.81693e-07	2.43435	11.5256
LOC103214892	7.81469	4.28692e-15	4.08438e-14	0.951338	65.5277
RGCC	7.79299	6.5881e-09	3.64171e-08	1.26146	28.6728
FGF21	7.46517	1.04691e-06	4.43186e-06	2.59768	4.47204
TMEM119	7.36828	5.54504e-07	2.4371e-06	2.44703	6.11064
LOC103228822	7.35482	2.58584e-07	1.18541e-06	2.36654	14.7874
NOG	7.33192	4.66229e-07	2.06792e-06	2.41407	8.2925
ENAM	7.13508	1.1991e-06	5.0478e-06	2.42994	6.65029
LOC103239442	7.1098	1.24407e-17	1.41734e-16	0.812333	31.3594
LOC103214890	7.00964	1.78349e-06	7.31378e-06	2.42854	5.30423
MMP25	6.98139	3.10589e-12	2.37765e-11	0.965438	24.9506
LOC103248267	6.96884	6.05218e-06	2.30254e-05	2.58854	3.63746
LOC103224727	6.91865	1.78013e-07	8.32244e-07	1.24999	31.9666
LOC103231015	6.9057	3.28487e-06	1.29519e-05	2.50508	5.02499
PRR19	6.90488	2.75989e-06	1.09993e-05	2.48671	6.39568
NEUROG2	6.81053	6.85724e-06	2.58742e-05	2.54375	4.0535
C12H9orf173	6.79932	3.40778e-06	1.33862e-05	2.40615	7.4578
BHLHE41	6.77832	1.27327e-11	9.21239e-11	0.965864	29.0101
LOC103222331	6.77767	4.23815e-06	1.64222e-05	2.42945	5.33579
LOC103248207	6.71941	8.72015e-06	3.24233e-05	2.4964	3.5538
LOC103222465	6.70078	9.695e-25	1.69573e-23	0.643471	56.4532
LOC103243101	6.64722	1.87369e-19	2.42807e-18	0.724909	47.145
MYRFL	6.64639	2.91416e-06	1.15677e-05	2.34025	9.5372
MUC22	6.64363	3.72409e-06	1.45408e-05	2.37002	7.05623
LOC103221862	6.63699	0.00040327	0.00115242	3.25725	8.30403
PLVAP	6.62642	7.59046e-06	2.84529e-05	2.44649	4.26322
LOC103248214	6.61498	5.79845e-06	2.21092e-05	2.45717	6.33587
LOC103243087	6.5983	3.7103e-11	2.56631e-10	0.962362	28.2128
LOC103239253	6.56003	7.23631e-06	2.72065e-05	2.41043	4.65691
MUC17	6.53052	9.4397e-24	1.55175e-22	0.640674	66.1481
TRIM10	6.52429	5.2507e-06	2.01305e-05	2.36133	6.1773
ASPRV1	6.5147	1.43739e-05	5.17607e-05	2.4757	3.56235
ASIP	6.48669	6.2761e-15	5.90203e-14	0.813868	26.9872
TSPEAR	6.47887	1.27782e-05	4.63423e-05	2.45195	3.88861
CTRC	6.46188	8.47017e-06	3.15436e-05	2.40108	4.98976
SLC9C2	6.43581	7.33922e-06	2.75604e-05	2.36207	6.42137
LOC103239441	6.42395	2.03342e-06	8.26653e-06	1.31473	7.696
SLCO5A1	6.4086	1.12659e-14	1.03821e-13	0.811547	33.2632
LOC103225418	6.37528	5.59846e-06	2.13812e-05	2.30112	10.234
TRIM51	6.36372	1.2763e-05	4.62958e-05	2.40492	4.64232
PGBD5	6.34736	3.40316e-05	0.000116391	2.52994	2.92107
WNK2	6.33227	1.78157e-05	6.34161e-05	2.43328	3.75326
OPN5	6.31731	2.46313e-05	8.58931e-05	2.47071	3.3371
MRC1	6.31684	4.84985e-06	1.86506e-05	2.26298	23.7077
DDX60	6.31161	2.175e-05	7.64536e-05	2.45023	3.6841
LOC103217751	6.30061	0.000102581	0.000325289	2.72521	2.47791
SPATS1	6.27233	1.15606e-05	4.22433e-05	2.4056	7.74143
LOC103233728	6.24798	8.06605e-06	3.01338e-05	2.30117	9.75934
LOC103240218	6.22222	1.19354e-05	4.34697e-05	2.33838	7.36115
LOC103246370	6.19771	1.24758e-05	4.53326e-05	2.34546	8.47144
RASGEF1B	6.17261	3.05049e-06	1.20834e-05	1.27016	11.7043
LOC103233729	6.16779	1.19253e-05	4.34412e-05	2.31742	7.31821
LOC103223112	6.13228	4.5029e-05	0.000150803	2.47857	3.7146
DMP1	6.10289	6.19098e-05	0.000203144	2.51915	3.22348
LOC103236881	6.09638	7.59013e-05	0.000245728	2.58634	2.84034
GPR61	6.07409	4.22093e-05	0.00014194	2.45057	3.31058
CX3CR1	6.07047	6.10611e-06	2.32118e-05	1.31419	7.46094
LOC103241830	6.06207	2.61758e-05	9.09256e-05	2.38093	4.58893
LSMEM1	6.05452	3.49054e-06	1.36885e-05	1.24321	28.5473
ALOXE3	6.04715	7.65841e-69	6.3612e-67	0.343918	137.735
PLCL1	6.03738	6.35447e-06	2.40977e-05	1.30326	7.6987
ZNF469	6.02353	3.015e-23	4.8505e-22	0.602795	50.4098
IRF8	6.02183	4.83507e-06	1.86051e-05	1.267	12.1302
LOC103239439	5.99037	0.000142401	0.00044081	2.65502	2.60143
DSCAML1	5.98342	4.52137e-05	0.000151368	2.42269	4.21266
LOC103233464	5.97994	1.05336e-25	1.95483e-24	0.56793	36.3313
SOCS2	5.9598	5.12313e-16	5.15182e-15	0.72682	24.7424
ANKRD1	5.9124	1.06288e-100	2.41454e-98	0.277142	165.828
LOC103248215	5.89192	2.83337e-05	9.80062e-05	2.31909	5.84362
LOC103230848	5.87009	4.12499e-05	0.000138837	2.36207	4.85776
LOC103218856	5.86274	4.29371e-05	0.000144284	2.36684	4.40476
LOC103222329	5.84368	5.65191e-05	0.000186078	2.40223	3.72726
LOC103229306	5.8325	5.14799e-05	0.000170709	2.38122	4.10344
UBTFL1	5.8205	7.13587e-05	0.000231857	2.4282	3.92619
LOC103243094	5.78634	4.31622e-05	0.000144989	2.3386	5.12157
STYK1	5.78628	4.22805e-05	0.000142129	2.33456	5.03205
LOC103236414	5.77267	1.52905e-37	4.69548e-36	0.44923	70.077
EREG	5.77148	9.0807e-09	4.94417e-08	0.983935	13.9012
DSPP	5.72851	1.68662e-05	6.02637e-05	1.30991	7.11183
MCHR1	5.71464	1.76886e-08	9.30576e-08	1.00021	10.4086
TMEM151B	5.706	1.89385e-24	3.25807e-23	0.555922	57.6331
GRIK3	5.68092	1.85962e-38	5.96313e-37	0.437293	51.8922
LOC103246921	5.6419	8.36834e-05	0.000269442	2.38219	4.01287
LOC103245068	5.63358	0.000140532	0.000435453	2.46758	3.42333
LOC103223596	5.61599	2.07748e-05	7.32712e-05	1.29676	8.1736
RBM44	5.60878	0.000290904	0.000853164	2.64436	2.48257
DNAI2	5.60842	1.95921e-08	1.02216e-07	0.979182	14.5829
LOC103238122	5.60116	0.000189979	0.000575429	2.5184	2.74461
COL5A3	5.59126	0.000124177	0.000388348	2.43248	3.2868
LOC103220468	5.58021	0.000233687	0.000697508	2.5568	2.52747
LOC103242748	5.5643	2.39023e-05	8.34743e-05	1.29317	7.99838
SEMG1	5.54842	0.000173869	0.000530382	2.50492	3.21873
LOC103215795	5.54513	9.68807e-17	1.03907e-15	0.664303	22.6955
LOC103241267	5.50007	0.000337456	0.000978582	2.63087	2.40968
LOC103226458	5.48596	0.000136952	0.00042499	2.4017	3.435
GPR142	5.4848	8.16825e-08	3.97862e-07	1.01447	10.3778
FAM69C	5.47046	0.000172335	0.000525985	2.44222	3.17666
LINGO3	5.45681	2.48078e-05	8.64764e-05	1.25656	14.1994
HENMT1	5.45407	0.000199533	0.000602241	2.4653	3.05234
LOC103214238	5.42937	0.000115476	0.000362944	2.37926	5.55834
LOC103235255	5.41267	9.03746e-08	4.37937e-07	1.00443	10.3598
LOC103241940	5.3924	0.00013238	0.000411886	2.35169	4.49626
PLEKHG4B	5.3716	0.000283083	0.000831649	2.5047	2.54254
LOC103223431	5.35051	0.000187666	0.000568881	2.40182	3.37499
LBH	5.29047	5.8113e-05	0.000191092	1.31226	6.20565
LOC103216552	5.27836	0.00083455	0.00224279	2.80869	1.96626
LOC103221684	5.27658	4.61667e-05	0.000154203	1.27127	11.9931
HSPA1L	5.24863	6.49838e-63	4.5549e-61	0.313447	103.597
PLA2G12B	5.23572	0.000390687	0.00111986	2.52261	2.70328
LOC103228821	5.22937	5.42253e-05	0.000179089	1.27572	9.89904
ADRB1	5.22915	1.17672e-09	7.08171e-09	0.860611	12.5013
NWD1	5.22818	0.000391119	0.00112075	2.53785	3.02955
NAALAD2	5.22342	4.0058e-18	4.74133e-17	0.599434	51.8813
DAPP1	5.21504	0.000271791	0.000800723	2.42065	3.04658
SNAI1	5.21453	0.000638564	0.0017564	2.66543	2.13841
CPA1	5.21121	0.000108109	0.000341498	1.3916	4.2054
EXO5	5.18104	0.000487474	0.00136939	2.55816	2.24698
LOC103230242	5.17574	2.17321e-09	1.27175e-08	0.870487	9.19297
LOC103242608	5.15734	7.84084e-05	0.000253366	1.30781	6.74229
LOC103239875	5.15089	0.000720816	0.00196458	2.67396	2.41208
TIMD4	5.15014	0.000376337	0.00108201	2.46959	2.61506
SCRT1	5.13541	6.41948e-27	1.27311e-25	0.478442	50.9297
ANKRD30A	5.12637	3.85342e-07	1.72703e-06	1.00907	9.31944
LOC103246057	5.11572	2.56649e-07	1.17769e-06	0.984758	13.5828
LOC103224732	5.11494	0.000622196	0.00171463	2.61292	2.89147
DGAT2	5.11206	0.000301697	0.000881527	2.39843	3.4333
CNGA1	5.10641	0.000672035	0.00184068	2.63477	2.3865
LOC103227170	5.10572	1.62841e-09	9.66738e-09	0.846982	12.288
C20H1orf162	5.10457	0.000267488	0.000789277	2.36242	4.22101
FGF9	5.10454	0.000277791	0.000817123	2.3712	3.75689
CD300A	5.08082	2.5565e-16	2.64415e-15	0.622033	22.8483
LOC103227078	5.07747	0.000158352	0.00048667	2.2415	7.11722
ACHE	5.07512	4.77291e-20	6.34649e-19	0.557442	35.8506
CLDN6	5.07216	0.00172418	0.00436192	3.07092	1.82111
LOC103237788	5.04471	0.000633921	0.00174465	2.57062	2.63287
LOC103219960	5.03054	7.82467e-12	5.77207e-11	0.73508	20.0881
FAM65B	5.02471	3.13073e-11	2.18386e-10	0.762611	12.4828
RFPL4A	5.01599	0.000157505	0.000484226	1.3661	5.69172
CMYA5	5.01206	2.20759e-21	3.18715e-20	0.52762	52.8578
LOC103221999	5.00751	0.000272761	0.000802953	2.32124	3.96921
LOC103214847	5.0033	8.72267e-31	2.08978e-29	0.434382	37.3691
LOC103235340	4.99698	0.000129891	0.000405078	1.32593	5.66978
LOC103221992	4.98046	0.000533377	0.00148924	2.48037	2.5277
LOC103214451	4.98018	0.00034962	0.00101121	2.36906	3.61596
WFIKKN2	4.97561	3.33801e-09	1.91359e-08	0.842502	14.2996
FAM166A	4.97449	8.33133e-14	7.24572e-13	0.666623	25.5177
DDN	4.94833	0.000158449	0.00048689	1.34143	5.71564
SLC7A11	4.94205	2.45798e-46	1.04854e-44	0.346573	46.3985
ADAM30	4.94121	0.000402719	0.00115102	2.38165	3.27935
FBP2	4.93574	0.00062063	0.00171107	2.50264	2.50622
HOXB9	4.88791	1.39714e-20	1.92566e-19	0.529514	22.7931
FER1L6	4.87409	0.000145507	0.000449908	1.28759	8.41928
LOC103234172	4.87133	1.04105e-06	4.40901e-06	0.998454	13.0081
OLIG2	4.86731	0.00130248	0.00337523	2.77187	2.15695
IRF4	4.86429	0.000231731	0.00069211	1.37142	5.05835
SAMD7	4.86271	0.00023955	0.000713204	1.37819	4.4906
LOC103245194	4.84586	0.000883748	0.00236155	2.58663	2.64662
LOC103221953	4.84036	1.03187e-06	4.37146e-06	0.991238	12.591
LOC103214240	4.83626	5.69272e-09	3.17094e-08	0.829626	22.5021
LOC103243398	4.82478	0.000248397	0.000737446	1.37089	5.85221
RAG1	4.81937	0.000598467	0.00165407	2.44425	3.70946
HRASLS5	4.81613	2.20579e-06	8.94027e-06	1.03671	7.98391
LOC103222930	4.80413	0.00262672	0.00640047	3.24176	1.73465
LOC103237953	4.80247	5.1084e-11	3.46887e-10	0.732459	24.1297
SLAMF9	4.80097	0.000467523	0.00131766	2.34919	3.68027
LOC103246776	4.79827	1.0248e-08	5.53813e-08	0.842278	15.7026
LONRF2	4.787	7.95292e-08	3.87975e-07	0.92008	6.4636
ACTBL2	4.78185	0.000784827	0.00212096	2.49656	2.59754
CHAC1	4.75208	1.78135e-30	4.21951e-29	0.416934	32.2793
LOC103243796	4.74356	0.000237088	0.000706656	1.31661	6.64695
LOC103232975	4.73364	0.000577098	0.00160088	2.36855	4.28173
RGS9BP	4.73274	2.50783e-17	2.79959e-16	0.563968	18.6586
LOC103241812	4.73235	1.14327e-87	1.73842e-85	0.238689	124.224
GLI1	4.72861	1.06996e-11	7.79525e-11	0.709225	15.0746
LOC103226859	4.72185	7.93406e-12	5.84362e-11	0.700209	12.2003
RFTN2	4.72175	0.000316173	0.000921113	1.37791	5.24724
ATP6V1E2	4.71293	9.32442e-12	6.84093e-11	0.700706	11.8101
PPP1R27	4.70555	4.27544e-06	1.65633e-05	1.04936	6.40667
TCEB3B	4.70401	0.000432199	0.00122765	1.44226	3.59858
ISM2	4.70316	0.000439585	0.001246	2.28244	4.88676
RAB44	4.70224	3.45759e-08	1.76007e-07	0.865357	10.9924
LOC103222016	4.69317	4.65536e-10	2.90076e-09	0.764641	15.7059
GAST	4.68505	0.000258395	0.000764841	1.30555	7.67423
LOC103243760	4.68242	2.24797e-22	3.41819e-21	0.48556	22.9363
SIX4	4.68158	1.9438e-31	4.80977e-30	0.40257	55.2196
LOC103235535	4.67065	0.000310983	0.000906973	1.3394	5.22179
LOC103236025	4.67065	2.16545e-06	8.78435e-06	0.987924	14.5059
LOC103243675	4.66989	0.000423701	0.00120514	1.41125	3.77029
LOC103220714	4.66257	1.80305e-09	1.06439e-08	0.792421	8.25475
GUCY2C	4.65977	2.49523e-06	1.00101e-05	0.994307	14.7688
S1PR5	4.65399	0.000410389	0.00117028	1.40602	4.01988
TRIB3	4.65308	9.33066e-21	1.30125e-19	0.514252	64.9977
CPNE5	4.63667	0.000290101	0.000851074	1.30597	7.7651
HES7	4.63335	5.79771e-34	1.57516e-32	0.383235	62.7202
MEFV	4.62913	3.32177e-13	2.75426e-12	0.643431	14.1135
ARRDC4	4.62698	1.29631e-51	6.46613e-50	0.306968	72.3019
DKK1	4.62673	0.000314846	0.000917672	1.31894	6.3235
ANGPTL4	4.6264	4.37953e-06	1.69491e-05	1.02267	8.69215
DNAJA4	4.62571	3.72174e-114	1.23111e-111	0.203954	130.684
LOC103226348	4.61933	0.00211197	0.00524583	2.88196	1.86431
DUSP8	4.61385	1.22918e-156	1.2198e-153	0.173205	302.228
APLNR	4.61257	6.75624e-11	4.52697e-10	0.720072	14.0412
GALR2	4.61193	6.5959e-15	6.19043e-14	0.598542	17.8892
HSPA1B	4.60757	5.12328e-81	6.31369e-79	0.241872	160.281
LOC103223706	4.60459	0.000922976	0.00245806	1.59365	2.70315
NEFM	4.60202	0.00101194	0.00267865	2.07368	10.733
CAGE1	4.5997	7.53795e-06	2.82786e-05	1.05614	6.03569
ANO1	4.59834	0.000442658	0.00125395	1.37926	4.93085
TNFAIP3	4.59651	6.12881e-264	3.85195e-260	0.132598	1083.76
LOC103236671	4.59228	0.000523911	0.0014652	1.42399	3.80334
LOC103236393	4.56079	0.000801623	0.00216263	2.37705	3.19744
LOC103235010	4.55996	1.09885e-07	5.27402e-07	0.874178	9.40001
LOC103245434	4.55861	0.000844802	0.00226744	2.39495	2.93823
LRRIQ4	4.55719	0.000351078	0.0010148	1.31152	6.7809
LOC103222162	4.5485	1.70361e-05	6.08248e-05	1.10926	4.79997
LOC103220473	4.54804	7.56425e-13	6.09504e-12	0.641604	18.4979
RND1	4.54759	4.78471e-17	5.25916e-16	0.54548	31.1319
ZNF229	4.54532	1.05354e-05	3.87676e-05	1.07247	5.49615
LOC103234482	4.53809	0.000399826	0.00114344	1.33383	6.50169
LOC103215262	4.52722	2.36676e-05	8.27158e-05	1.14157	4.64743
LOC103237761	4.52082	0.000506421	0.00141965	1.37698	5.43839
LOC103221814	4.51668	0.00124134	0.00322923	2.52044	2.92339
LOC103222895	4.51439	0.00045049	0.00127384	1.35133	5.36948
SLC39A4	4.51233	0.000995446	0.00263982	2.42591	2.99869
RET	4.5106	1.7497e-08	9.20755e-08	0.829783	7.30743
GJD4	4.50696	1.8152e-07	8.47798e-07	0.887522	8.38763
SPINK4	4.50395	0.000603527	0.00166684	2.25868	5.38737
DACT1	4.4951	4.967e-33	1.308e-31	0.377314	51.1404
LOC103241837	4.48893	0.00112017	0.00294407	2.45871	2.76008
LOC103246916	4.4806	2.28042e-05	7.98911e-05	1.12195	4.91546
MAP6	4.47742	8.34337e-08	4.05763e-07	0.845145	14.1
CXCL1	4.47316	0.000510062	0.00142917	1.35148	5.02521
SOWAHB	4.47182	0.00152917	0.00390737	2.58815	2.71913
C16H17orf77	4.47047	0.0007291	0.00198572	1.46384	3.42321
LOC103217579	4.46957	8.05189e-06	3.00869e-05	1.02072	9.82332
C20H1orf61	4.46495	0.000751953	0.00204177	2.30312	4.01508
LOC103217534	4.46272	0.00231579	0.00571002	2.86229	2.03572
LOC103224014	4.45994	2.17912e-09	1.27442e-08	0.755225	14.685
LOC103225836	4.44905	9.45309e-14	8.18357e-13	0.605115	17.5681
CDHR1	4.44765	5.19091e-07	2.28839e-06	0.919958	6.22691
LOC103227183	4.43647	0.000848278	0.00227579	2.32533	3.7344
KLK4	4.43159	0.00131457	0.00340284	2.49015	2.69213
NACAD	4.42463	1.1287e-12	8.9834e-12	0.629302	18.7707
CTGF	4.42007	2.80684e-58	1.75242e-56	0.27544	77.7398
LOC103248270	4.41977	4.6376e-08	2.32311e-07	0.843289	6.24569
SOST	4.41966	1.79109e-12	1.39954e-11	0.641027	14.5578
COPZ2	4.41852	0.000526247	0.00147085	1.3301	6.27742
LOC103223601	4.40987	1.80988e-05	6.43386e-05	1.07527	5.89621
LOC103227616	4.40295	0.000549263	0.00153019	1.33049	6.00477
LOC103217297	4.40155	0.00302083	0.0072678	3.07154	1.68297
NFKBID	4.38333	5.74085e-11	3.8811e-10	0.677789	30.6503
OTOGL	4.38244	1.52108e-10	9.95286e-10	0.695497	14.2004
PCSK1N	4.37726	0.00310486	0.00744525	3.08738	1.66236
SHISA2	4.36911	9.68426e-09	5.25458e-08	0.780311	11.6734
MRGPRE	4.36747	3.574e-05	0.000121704	1.13709	4.3685
LOC103235257	4.36493	2.14517e-05	7.54893e-05	1.07712	7.13174
MYO3B	4.36491	0.00158083	0.00402846	2.53002	2.6525
MLC1	4.3528	9.00201e-07	3.8462e-06	0.927208	6.41636
CNN1	4.34928	4.86938e-07	2.15471e-06	0.889107	12.1926
FAM46B	4.3428	1.73388e-27	3.56124e-26	0.40234	48.2137
LOC103235306	4.33531	2.53053e-05	8.80967e-05	1.07691	6.56576
TOX3	4.33409	0.00211681	0.00525579	2.66602	2.25141
DNAH17	4.32574	8.09497e-138	4.62517e-135	0.173396	178.184
FAM46C	4.32084	4.88081e-18	5.75892e-17	0.504027	24.8388
HTRA3	4.32072	0.00220338	0.00545494	2.70016	2.08148
TRPV2	4.31799	1.73672e-05	6.1913e-05	1.03989	7.91062
CCDC73	4.31724	0.00111103	0.00292374	1.48268	3.34938
LOC103226752	4.31349	3.025e-07	1.37404e-06	0.859579	12.4422
FZD8	4.30728	3.16916e-61	2.14944e-59	0.261849	83.9891
BAI1	4.29298	3.97422e-06	1.54662e-05	0.999062	4.42088
ATP1B2	4.29096	0.000753183	0.00204453	1.35983	4.84179
LOC103246909	4.28788	0.000861163	0.00230806	1.39074	4.66741
MYCL	4.27714	7.22239e-36	2.08542e-34	0.34392	52.0164
LOC103243446	4.27707	1.60633e-05	5.75149e-05	1.01864	9.08539
DACT3	4.26771	4.80374e-08	2.40187e-07	0.812746	7.38792
INHBE	4.26729	4.72289e-09	2.65346e-08	0.752116	8.24219
ULBP3	4.25897	4.36087e-08	2.19147e-07	0.809362	8.79209
KPNA7	4.25437	0.000913552	0.00243567	1.39718	4.34946
LOC103217588	4.22066	0.00275174	0.00667405	2.79064	1.86186
NR4A3	4.20544	9.64438e-14	8.33004e-13	0.570072	50.7205
HSPH1	4.19151	0	0	0.106976	862.707
LCK	4.18908	0.00230018	0.00567744	2.60671	2.39901
PLCXD2	4.18728	4.48866e-32	1.14215e-30	0.358189	34.4416
KCNQ2	4.17507	1.07886e-07	5.18528e-07	0.821185	7.67886
SLC15A2	4.17184	0.00383064	0.00898678	3.15694	1.60789
KCNE1L	4.16856	1.73675e-07	8.12988e-07	0.833879	9.33414
SLC17A8	4.16358	0.000996764	0.0026422	1.35731	5.56213
LOC103225886	4.16231	2.41938e-06	9.7301e-06	0.930954	6.85723
LOC103244310	4.15619	0.00142386	0.0036611	2.34348	3.3965
LOC103218361	4.15032	0.00149496	0.00382514	1.51189	3.55072
LOC103219701	4.14416	0.00177477	0.00447682	1.55346	2.77679
LOC103236599	4.14331	0.0015377	0.00392758	1.51462	3.05125
LOC103221695	4.13157	0.00281199	0.0068053	2.73224	2.05462
COL23A1	4.12861	0.00106889	0.00282031	1.36527	4.6222
PHEX	4.12289	3.62045e-05	0.000123197	1.03781	8.34839
CILP	4.11911	4.74831e-05	0.000158207	1.07461	6.12651
SECTM1	4.1144	8.71814e-08	4.22898e-07	0.79661	9.13412
LOC103248202	4.11399	2.56941e-09	1.49157e-08	0.708757	11.4998
ARID3B	4.1123	1.04034e-67	8.20736e-66	0.237526	97.4274
PTPDC1	4.1117	1.39026e-06	5.79939e-06	0.912441	4.90832
GCH1	4.11067	5.45202e-17	5.94895e-16	0.49798	27.3886
CRTAM	4.10979	0.0011988	0.00313111	1.39244	4.49139
ZFAND2A	4.10815	3.97534e-61	2.67697e-59	0.249906	83.9056
LOC103215293	4.08839	8.66978e-06	3.22551e-05	0.99292	4.58493
C7H4orf32	4.08735	0.00237669	0.00584708	2.56907	2.79926
LOC103243082	4.08062	1.08811e-07	5.22575e-07	0.798521	9.00256
LOC103243062	4.07219	0.00136464	0.00352228	1.41201	4.41422
FAM71A	4.07099	1.10698e-35	3.18659e-34	0.328278	84.9766
BTK	4.05843	0.00161946	0.00411856	1.45422	3.46692
KIF17	4.05134	5.91697e-12	4.42014e-11	0.601187	24.096
MUC12	4.04176	4.94945e-17	5.42885e-16	0.491778	22.9728
KCP	4.03892	0.000145502	0.000449908	1.16556	3.95925
LOC103233467	4.03692	0.00179209	0.00451616	1.47859	3.34565
LOC103246893	4.03548	2.24529e-15	2.17548e-14	0.520747	14.9752
FHDC1	4.03465	3.17325e-09	1.82358e-08	0.69882	15.3924
CATSPERD	4.03449	0.00192739	0.00482552	1.53268	2.94181
LOC103226718	4.03294	6.56233e-05	0.000214404	1.0729	5.65737
LOC103243707	4.03247	8.53224e-06	3.17622e-05	0.979102	5.79714
SLC25A25	4.02437	5.4403e-86	7.89053e-84	0.205387	134.513
CACNG4	4.02323	0.00173361	0.00438402	1.4748	3.37317
CXCL8	4.01586	7.07144e-05	0.000229923	1.08072	6.1809
PRDM1	4.01482	6.84872e-05	0.000223214	1.07131	9.79969
CCDC81	4.01242	1.63226e-11	1.16665e-10	0.609491	14.7669
METTL21C	4.01026	0.00221691	0.00548554	2.45796	2.55862
ABCG8	4.00716	0.0014827	0.00379894	1.39803	4.09081
CDK5R1	4.00427	3.01394e-51	1.47605e-49	0.267272	84.6333
TSGA10IP	4.00397	0.00119977	0.00313319	1.31721	6.70626
LOC103215292	4.0037	0.00380543	0.00893763	1.89324	2.16689
RAD51AP2	4.00102	0.00214173	0.00531067	2.43323	3.53592
MFSD2A	4.00081	6.36496e-32	1.61089e-30	0.342775	49.8935
WNT7B	3.99475	6.32662e-09	3.50745e-08	0.706435	12.8442
LOC103235355	3.99219	0.00362684	0.00855977	1.8096	2.2005
C5AR1	3.97094	5.43872e-06	2.08006e-05	0.925337	6.32674
MYPN	3.96899	1.38578e-05	4.99977e-05	0.987018	4.70782
AQP3	3.96895	9.00037e-05	0.00028807	1.08468	5.16584
PTPRQ	3.96887	0.00148339	0.00380019	1.35916	5.09615
LOC103243839	3.96532	0.00311101	0.00745622	2.66365	1.95559
GFRA3	3.96321	0.000222276	0.000665451	1.19602	3.66982
SDR16C5	3.96117	0.00241763	0.00593548	2.4704	2.93849
LOC103215251	3.95868	3.47327e-07	1.56612e-06	0.817521	8.76134
TACSTD2	3.9573	6.44541e-05	0.000210877	1.03641	8.83164
LOC103245839	3.95371	5.3435e-09	2.98789e-08	0.708047	7.57553
LOC103237735	3.95125	3.14563e-16	3.22692e-15	0.492078	22.4456
C1QTNF1	3.94639	5.74995e-07	2.52305e-06	0.831795	6.68071
LOC103227311	3.94321	0.00371813	0.00875222	2.77427	2.15792
TNFSF13	3.93677	8.75615e-32	2.18962e-30	0.338846	39.3572
LOC103242804	3.93522	0.00260942	0.00636407	1.57703	2.77348
GATA3	3.92705	1.97556e-07	9.18601e-07	0.796027	6.48337
HSPA1A	3.92304	1.12126e-59	7.21545e-58	0.241779	108.953
SYNE3	3.9224	0.00027515	0.000809733	1.24297	3.79076
LOC103248210	3.92214	0.00324969	0.00775313	2.63176	2.51767
LOC103216963	3.92122	0.00239232	0.00588023	1.52197	3.00277
EVX1	3.91566	0.0002433	0.000723682	1.20451	3.47046
MOGAT3	3.91239	0.00276311	0.00669819	1.60562	3.06749
LOC103240825	3.91112	0.00194353	0.00486141	2.31455	3.93158
LOC103221728	3.90826	0.00401086	0.00936762	2.82387	1.95585
IER5	3.90768	2.50023e-116	9.42837e-114	0.170833	230.458
TMEFF1	3.90498	1.01021e-10	6.6904e-10	0.620791	13.1395
LOC103223217	3.89603	8.21064e-06	3.06376e-05	0.926644	6.05071
TIGD3	3.88721	1.06828e-10	7.06253e-10	0.623247	13.9097
TOX2	3.88692	0.00351979	0.00833424	2.6696	2.52381
LOC103236463	3.88426	3.39592e-07	1.53255e-06	0.796983	11.3269
LOC103241697	3.88188	1.52022e-08	8.04482e-08	0.706458	13.1687
LOC103246720	3.87618	0.00164346	0.0041762	1.3394	6.5361
HBEGF	3.86676	9.88894e-112	3.16027e-109	0.172474	232.756
FAM71E2	3.86602	7.2274e-07	3.12968e-06	0.824736	8.07317
ZNF432	3.86531	0.000105552	0.000334148	1.06266	6.13669
LOC103221974	3.86477	0.00230445	0.00568499	2.36851	3.29825
DDR2	3.86316	1.56837e-96	3.01752e-94	0.185825	138.14
ANKRD35	3.84489	8.28334e-08	4.03051e-07	0.750706	11.209
CDC42BPG	3.8444	1.46757e-13	1.24926e-12	0.531833	15.9841
DCLK3	3.8434	5.48057e-07	2.41101e-06	0.801109	9.21506
KIAA0319	3.83937	3.98176e-19	5.05222e-18	0.435572	35.6935
LIPH	3.83343	1.8895e-28	4.08094e-27	0.350326	38.4212
LOC103241948	3.83009	2.2686e-06	9.16727e-06	0.864838	5.6116
THBS2	3.82987	9.2075e-104	2.34605e-101	0.177504	198.948
BACH2	3.82603	1.66816e-34	4.62546e-33	0.314424	84.9665
MYO5C	3.82075	1.58107e-07	7.44345e-07	0.767325	7.1391
SLC44A4	3.81717	1.18111e-23	1.93147e-22	0.384802	54.3793
LOC103222948	3.81609	2.38831e-06	9.61391e-06	0.872857	6.50884
LOC103230900	3.81081	0.000235288	0.000701845	1.14857	4.35447
LOC103238753	3.80521	0.00261413	0.00637308	2.39748	3.09505
TUSC5	3.80418	0.00230427	0.00568499	1.42833	4.21267
FYN	3.80383	1.1848e-07	5.66559e-07	0.751922	8.16377
LOC103215289	3.80092	1.68542e-11	1.20291e-10	0.578379	16.2559
NRARP	3.7911	2.08359e-14	1.88023e-13	0.507362	19.1739
FILIP1	3.78849	2.6122e-05	9.07554e-05	0.97487	5.06776
LOC103240347	3.7842	0.00417943	0.00971319	2.7964	2.01273
DHRS2	3.78122	3.30251e-28	7.04398e-27	0.346501	39.1106
FEV	3.77466	0.0029639	0.00714085	1.53334	2.9125
LOC103242605	3.76068	0.00288239	0.00695691	1.4832	3.43456
MAP3K19	3.75658	0.0033854	0.00804743	1.60041	2.74928
CD300C	3.75632	2.23158e-10	1.44097e-09	0.613998	9.94579
LOC103235530	3.74924	0.00358991	0.00848217	1.63912	2.99214
FAM186B	3.74878	5.12252e-10	3.17819e-09	0.622516	14.9838
ADAMTS4	3.74821	0.000232003	0.000692811	1.12155	4.96765
EVPL	3.74493	1.79028e-43	7.07667e-42	0.272331	128.459
ACTRT3	3.74289	1.19665e-05	4.35744e-05	0.910998	8.42411
ATAD3C	3.73839	2.48046e-06	9.9551e-06	0.847548	8.3455
LOC103243869	3.73713	0.000302694	0.00088403	1.15494	4.00542
GATM	3.734	0.00376008	0.00884215	1.60967	2.69518
BSX	3.72534	0.000165176	0.000506075	1.06749	7.61452
LOC103239444	3.72319	0.000522775	0.00146224	1.23849	3.62122
CCDC168	3.71926	3.45636e-33	9.19178e-32	0.311837	129.504
ATP8A2	3.71451	3.54579e-06	1.38965e-05	0.85712	7.96557
LOC103235014	3.71394	0.000251624	0.000746558	1.10975	5.17052
MMP11	3.70695	1.33995e-15	1.31724e-14	0.475784	12.7679
GPR156	3.70549	0.00373164	0.00878184	1.55928	2.82522
LOC103227291	3.70321	0.00403661	0.00941959	1.62454	2.49896
BDNF	3.69798	8.87328e-27	1.74823e-25	0.349777	30.3233
LOC103237004	3.69798	2.54074e-57	1.516e-55	0.232742	117.918
NEURL3	3.69707	1.14702e-12	9.11384e-12	0.530157	37.692
LOC103223633	3.69695	3.09689e-06	1.2262e-05	0.844909	6.39352
LOC103236975	3.69665	0.000263863	0.000779924	1.11031	6.69852
COL12A1	3.69112	5.26328e-97	1.03374e-94	0.177202	132.308
LOC103228469	3.6889	3.11133e-06	1.2314e-05	0.845868	7.05904
PDE4C	3.68749	0.00185817	0.00466523	1.82817	12.8378
MYH15	3.68337	0.000174345	0.000531662	1.04788	9.06063
LOC103235307	3.68149	1.98825e-24	3.41114e-23	0.364624	44.8688
DLL4	3.681	1.22051e-12	9.67328e-12	0.534824	16.5876
AATK	3.67699	4.74806e-11	3.23778e-10	0.577273	13.1739
CLDN19	3.67609	1.31673e-05	4.76525e-05	0.89287	8.78662
LOC103226872	3.67159	7.3832e-09	4.05624e-08	0.663088	9.40053
ETS2	3.67054	3.12413e-66	2.38483e-64	0.214415	149.729
LOC103222321	3.66955	0.00351033	0.00831393	1.53908	3.34913
GUCY2F	3.66828	0.00342065	0.00811888	1.51864	3.35498
KCNE4	3.66306	3.14961e-08	1.60938e-07	0.694376	10.7096
LOC103236371	3.65841	0.00352293	0.00834064	1.52718	3.1747
RBFOX3	3.65192	4.51074e-21	6.39955e-20	0.393833	23.4733
BEST1	3.65146	1.78843e-34	4.94442e-33	0.301055	45.9908
LOC103241868	3.64985	6.23593e-05	0.00020452	1.01	4.16075
SLC5A5	3.64894	0.000328794	0.000955077	1.13971	4.74863
NR2E1	3.64733	0.00262473	0.00639728	2.27027	5.10199
LOC103246669	3.64642	0.00424874	0.00985705	2.60284	2.46538
ACAN	3.64337	3.88416e-10	2.43904e-09	0.602372	11.9537
C6H19orf26	3.64334	6.7759e-75	6.94346e-73	0.199723	109.739
MYOCD	3.64035	8.31338e-08	4.04409e-07	0.72006	7.90855
LOC103223616	3.63398	0.00387973	0.00909516	2.54329	2.50143
SOCS1	3.63209	1.511e-13	1.28449e-12	0.502673	20.3294
LOC103243882	3.61196	6.13683e-05	0.000201445	0.995507	4.71339
DCSTAMP	3.60912	0.000808426	0.00217973	1.27325	3.78694
LOC103235886	3.60887	0.0036179	0.00854296	1.49296	3.41737
ELOVL4	3.60814	0.00358144	0.00846428	1.48944	3.23477
LOC103246082	3.60366	1.60057e-14	1.4551e-13	0.482081	16.9117
MYZAP	3.60226	1.42663e-16	1.51034e-15	0.445402	22.3551
LOC103216249	3.59686	0.00410496	0.00956371	2.55333	2.26305
PNLDC1	3.59477	2.99745e-09	1.72624e-08	0.627711	17.4308
ZNF367	3.59451	5.54191e-58	3.4148e-56	0.224875	93.2815
FRMD3	3.59047	2.87679e-05	9.93625e-05	0.927731	7.1773
TTLL8	3.58975	0.000793632	0.00214291	1.25252	3.63498
LOC103223034	3.58204	9.49443e-06	3.51428e-05	0.876295	6.01618
LOC103231437	3.58182	0.00423805	0.00983731	2.57281	2.24858
LOC103238265	3.58008	0.00422473	0.00981244	2.56978	2.25446
RELT	3.57897	2.45238e-19	3.15414e-18	0.405584	24.004
CDH15	3.57696	0.0033472	0.00796159	1.41555	4.04048
BDKRB1	3.57028	8.54536e-05	0.000274719	1.00828	5.48437
GEM	3.56959	2.18665e-113	7.1085e-111	0.158086	239.625
GRHL1	3.56939	8.06083e-19	1.00286e-17	0.409533	25.34
FAM83G	3.56524	7.08641e-155	6.36259e-152	0.13486	234.613
LOC103236320	3.56368	0.00038761	0.00111171	1.11011	4.8615
DLGAP3	3.5561	2.22605e-06	9.01464e-06	0.792851	10.791
LOC103219296	3.55557	5.84691e-11	3.94505e-10	0.562483	10.8039
LOC103239665	3.55468	5.55529e-06	2.12206e-05	0.857227	4.80151
CEP85L	3.55334	2.62403e-91	4.37841e-89	0.175767	163.32
TMC7	3.54944	7.20566e-35	2.01577e-33	0.290737	54.3144
SIPA1L2	3.54556	1.21869e-05	4.43427e-05	0.892035	6.22774
LOC103222275	3.54541	0.00325241	0.00775741	1.35916	6.10529
CDO1	3.5343	0.000750477	0.00203806	1.24581	3.23346
LOC103245175	3.52654	1.19608e-08	6.41231e-08	0.646061	9.88935
PTPRN2	3.52484	1.49155e-12	1.17375e-11	0.512038	16.742
ACER2	3.52233	7.2411e-15	6.78246e-14	0.462936	20.3266
EFCAB4B	3.5169	2.42226e-08	1.25231e-07	0.661736	9.07609
IP6K3	3.51528	1.27964e-82	1.68725e-80	0.183194	220.16
HES4	3.51451	1.48415e-23	2.41655e-22	0.355946	31.5506
TRIM15	3.51379	0.00367341	0.00865994	1.39231	4.93988
LY6G6D	3.5128	0.00368048	0.00867551	2.37096	3.2848
LOC103248212	3.51084	0.000921873	0.00245611	1.27694	3.23678
LOC103232835	3.51033	3.14342e-23	5.04419e-22	0.358654	28.5636
LOC103226869	3.50775	7.98509e-09	4.37417e-08	0.63878	8.26495
CHST3	3.50039	1.75334e-26	3.38721e-25	0.33314	33.4253
NETO1	3.49679	1.46577e-17	1.66188e-16	0.417555	26.1031
DENND2A	3.49261	0.000738075	0.00200785	1.20009	3.7473
LOC103230837	3.49107	1.02254e-07	4.92589e-07	0.69052	9.32699
IPPK	3.48954	1.56978e-65	1.18868e-63	0.205218	94.4747
LOC103235309	3.48921	2.22859e-08	1.15567e-07	0.65507	9.36192
NFATC2	3.48739	8.95542e-11	5.95607e-10	0.554388	17.0098
CHRNE	3.48584	3.4671e-11	2.40251e-10	0.546803	13.1508
PLB1	3.4802	1.82226e-06	7.46119e-06	0.77901	7.4901
IL11	3.47798	1.30848e-194	2.74126e-191	0.117022	487.123
LOC103239828	3.47741	4.07491e-08	2.05985e-07	0.669613	9.27847
C6H19orf35	3.47672	5.42159e-13	4.41764e-12	0.493359	26.417
SLC22A9	3.47306	6.90742e-07	3.00022e-06	0.747355	6.58314
SPTBN2	3.47111	1.67542e-10	1.09384e-09	0.562146	13.1989
TEX26	3.47018	0.00395968	0.00926529	1.40704	4.54395
LOC103237789	3.45671	4.39288e-09	2.47913e-08	0.616817	11.1512
CCRN4L	3.45663	2.15502e-75	2.24491e-73	0.188981	130.74
LOC103220471	3.45612	4.2689e-08	2.15214e-07	0.668285	9.52141
OSM	3.45326	0.000795522	0.0021474	1.20017	3.95804
LOC103238532	3.4497	0.0010568	0.00279114	1.25053	3.35718
OLFML2A	3.44714	6.45431e-05	0.000211131	0.971902	4.91981
LOC103233496	3.4457	2.31877e-30	5.46506e-29	0.304251	43.4436
GOLGA6B	3.44242	1.24544e-11	9.02834e-11	0.520838	25.6641
ERC2	3.43406	3.81206e-06	1.48689e-05	0.801385	6.08798
DNAJB1	3.43345	1.08419e-233	4.08848e-230	0.105369	739.54
LOC103214226	3.43115	1.44017e-05	5.18411e-05	0.856611	6.41087
BAG3	3.4238	5.85667e-261	2.76069e-257	0.0993538	489.246
CSRNP1	3.42289	7.16505e-178	1.35097e-174	0.120644	386.726
CDC42EP5	3.4226	0.000288212	0.000846323	1.10148	3.50655
IGFALS	3.4208	1.01865e-06	4.32e-06	0.74162	9.56614
B3GNT5	3.41896	2.88682e-22	4.36146e-21	0.357756	27.5837
RTP2	3.41466	0.00411242	0.00957871	1.35913	5.71382
HES5	3.41461	1.28852e-06	5.40009e-06	0.761126	5.90101
ZBTB43	3.41219	9.62517e-105	2.52059e-102	0.157574	158.908
LOC103233786	3.41044	9.77587e-05	0.00031099	0.966899	5.10534
ADAM32	3.40835	4.33576e-05	0.000145594	0.89144	10.8623
PTGIR	3.40629	0.00136076	0.00351372	1.29047	3.23676
XYLT1	3.40535	5.01724e-73	4.75377e-71	0.189201	94.5099
HSPA6	3.40495	3.11823e-40	1.07485e-38	0.258581	66.0374
GAS2L3	3.403	8.71997e-38	2.72662e-36	0.26764	73.7885
PTPRO	3.397	0.000683738	0.00187164	1.12989	4.65751
LOC103235012	3.39422	0.000125641	0.000392602	0.98619	5.30828
NCAN	3.38992	0.000951133	0.00252978	1.20418	3.61786
FAM90A1	3.38761	2.3474e-22	3.56362e-21	0.354636	23.6508
CCM2L	3.38474	0.000734298	0.00199902	1.13635	4.46682
SLC5A10	3.38431	9.18307e-35	2.56514e-33	0.277896	45.013
IGSF9	3.38051	4.66747e-20	6.21505e-19	0.374837	33.2574
HOXA13	3.37844	0.00061719	0.00170258	1.1166	5.53191
DUSP5	3.37782	3.87725e-82	4.97317e-80	0.176441	169.468
LOC103233821	3.37464	8.1547e-07	3.50244e-06	0.732769	6.66734
CPA5	3.37393	1.46408e-06	6.08313e-06	0.754542	6.95155
BEST3	3.36686	1.8455e-07	8.60884e-07	0.679795	11.5306
RPE65	3.36625	0.000177549	0.000540662	1.01431	4.22682
LOC103235536	3.36576	0.000866567	0.00232123	1.15921	4.22072
CELF6	3.35657	6.50695e-10	4.00289e-09	0.5686	13.1276
HEY1	3.35638	0.000139775	0.00043329	0.979142	5.60765
LOC103222484	3.35557	0.00102796	0.00271801	1.18522	4.01495
LOC103226502	3.35213	2.67875e-10	1.71504e-09	0.55158	15.8665
LOC103242526	3.34816	8.17807e-07	3.51007e-06	0.726003	7.0396
LOC103222267	3.34296	3.61473e-08	1.83461e-07	0.643565	7.70347
GFOD1	3.33665	4.43728e-16	4.50296e-15	0.422414	18.9716
LOC103231510	3.33476	1.04501e-11	7.62231e-11	0.505183	23.1697
CENPL	3.33252	1.64862e-09	9.78122e-09	0.57642	13.5217
C26H15orf59	3.33168	1.21137e-09	7.28327e-09	0.575863	11.5072
LOC103245804	3.32953	2.83392e-07	1.29316e-06	0.690469	8.16309
LOC103243083	3.32145	0.000201872	0.000608751	1.01176	4.54529
LOC103216788	3.31824	6.92898e-06	2.61239e-05	0.799772	6.88809
KCNH2	3.31722	2.23088e-11	1.57305e-10	0.514359	13.9916
KIAA1462	3.31502	2.34729e-20	3.18863e-19	0.365189	23.0121
ANKRD31	3.31126	6.71567e-09	3.70679e-08	0.598009	10.1496
LOC103243092	3.30761	0.000233071	0.000695782	1.02306	4.12492
PHF21B	3.30333	3.47885e-68	2.80315e-66	0.190308	84.795
CCNB1IP1	3.30254	2.06648e-24	3.53893e-23	0.328772	44.8827
SLC25A33	3.30216	2.18496e-27	4.47797e-26	0.308587	40.3779
UTP15	3.30172	5.16087e-55	2.87894e-53	0.21262	91.9701
LOC103220831	3.29999	0.00118586	0.00310288	1.205	3.64392
CNKSR1	3.29962	2.5595e-06	1.02548e-05	0.749204	8.82805
MUC16	3.29481	3.08125e-12	2.35975e-11	0.486756	18.4381
LOC103221835	3.29152	0.00126036	0.00327463	1.21451	3.39364
CRY1	3.28763	2.49633e-51	1.23215e-49	0.219686	86.0739
LOC103237759	3.28717	6.24224e-07	2.72526e-06	0.70786	6.6235
KBTBD8	3.28347	1.47151e-08	7.80239e-08	0.608832	9.60021
ZSWIM6	3.28148	1.13662e-114	3.89655e-112	0.144622	263.209
PMAIP1	3.27605	1.38062e-70	1.22791e-68	0.185208	184.454
WDR86	3.26985	0.00102586	0.00271283	1.1531	4.13327
CXCL3	3.26865	4.81502e-05	0.000160232	0.890361	5.06384
PDE6G	3.2631	0.00129779	0.00336402	1.21871	3.63182
REL	3.25628	9.95912e-28	2.06351e-26	0.302114	45.2738
GRASP	3.25515	8.57346e-11	5.71412e-10	0.517929	24.2515
LOC103246940	3.25508	1.11247e-05	4.07929e-05	0.811603	5.65944
NMRK2	3.25197	0.00118869	0.00310769	1.1766	4.19534
FEZ1	3.2518	3.52232e-06	1.38074e-05	0.750552	9.24873
OVGP1	3.25176	0.000126106	0.00039386	0.931523	7.90865
LOC103242734	3.24994	0.00042484	0.00120802	1.08113	3.68542
DSE	3.24503	1.63016e-25	2.99577e-24	0.314876	43.4171
HEPHL1	3.2427	0.00109084	0.0028734	1.16187	4.19892
GPRC5D	3.23547	1.2464e-10	8.20561e-10	0.520372	16.8534
POU2F2	3.23345	2.08837e-20	2.8451e-19	0.355516	31.4929
LOC103239437	3.23186	9.36377e-06	3.46932e-05	0.792543	6.22967
NPAS4	3.22185	0.000286196	0.000840534	1.019	4.25461
IFRD1	3.21479	2.39974e-71	2.17534e-69	0.180717	200.061
CFP	3.21098	0.000922995	0.00245806	1.1049	6.18366
IL12A	3.20625	2.52033e-05	8.77739e-05	0.822874	8.20623
SLC16A6	3.20177	7.821e-05	0.000252768	0.91879	5.34415
CDC20B	3.20056	0.000128566	0.000401011	0.913536	9.92892
LOC103236357	3.19895	0.000140996	0.000436676	0.922356	8.10236
MAPK4	3.19461	0.00129678	0.00336231	1.15831	4.29646
CREB5	3.19324	2.32277e-215	6.25655e-212	0.10209	573.559
JAKMIP3	3.19242	8.66442e-08	4.20401e-07	0.634827	7.72251
CDH1	3.19219	0.00191011	0.00478671	1.28667	3.1948
DPCR1	3.19104	2.76549e-09	1.59949e-08	0.560746	16.4003
SLC35G6	3.18869	1.44515e-05	5.20005e-05	0.802519	6.1305
ZNF287	3.18828	3.09282e-05	0.000106375	0.835889	7.77092
LOC103241076	3.18197	3.98632e-06	1.55069e-05	0.735642	11.8932
LOC103227315	3.18129	5.65323e-12	4.22983e-11	0.479184	15.2197
DNAH8	3.17853	0.00121737	0.00317519	1.23901	2.94887
PCDH12	3.17706	5.83569e-07	2.55769e-06	0.680224	8.32358
KCNA7	3.17333	3.46469e-08	1.76273e-07	0.606282	11.8386
TFAP2C	3.17063	8.05484e-17	8.68844e-16	0.389212	26.5462
BDKRB2	3.16826	2.0016e-10	1.29736e-09	0.517582	15.2757
GPR98	3.16382	8.28248e-06	3.08751e-05	0.766373	7.66798
BTBD17	3.15793	0.0022177	0.00548678	1.31185	2.90244
EMP1	3.15392	4.49569e-13	3.68388e-12	0.448622	17.4875
MEGF9	3.15273	3.25572e-33	8.67044e-32	0.265742	46.8786
TUBA8	3.1502	9.13627e-05	0.000292221	0.902469	5.03518
EPPK1	3.14601	4.44946e-16	4.51289e-15	0.396276	20.6957
LOC103227481	3.14497	0.00111345	0.00292928	1.09757	5.8031
CHST11	3.13981	2.1249e-15	2.06202e-14	0.405047	38.6653
ING1	3.13869	3.59291e-43	1.40548e-41	0.229411	77.6386
LOC103238706	3.12491	0.00328709	0.00783441	1.39679	2.73622
KLHL33	3.12057	0.000324222	0.000942845	0.990701	4.78317
LOC103244816	3.1187	0.000712815	0.00194474	1.09261	4.13088
WEE1	3.1075	3.11594e-74	3.10852e-72	0.171143	157.219
LOC103216965	3.10329	1.5684e-06	6.49508e-06	0.697557	8.06858
MAFA	3.09353	1.00788e-29	2.32318e-28	0.276106	64.6025
ADRA2A	3.09258	0.00269616	0.00655443	1.31166	2.80903
LOC103237733	3.09044	1.63787e-05	5.85773e-05	0.783724	7.37229
CAMK2A	3.0878	2.8325e-07	1.29283e-06	0.642036	7.66196
AEN	3.08685	1.90203e-138	1.12071e-135	0.123558	319.763
FAM83B	3.0861	0.00222263	0.00549754	1.24328	3.3878
LOC103214285	3.08539	0.000503109	0.00141099	1.03654	4.16186
CTIF	3.08154	6.06152e-116	2.19788e-113	0.13514	192.143
LOC103234016	3.08107	0.000184839	0.000561124	0.939763	4.7717
INHBC	3.08091	0.00171173	0.00433318	1.16418	4.50463
GBX2	3.08039	1.22827e-13	1.05173e-12	0.428379	18.7881
SH2D5	3.07802	3.75258e-15	3.58979e-14	0.40122	22.6142
ATF3	3.07407	2.19018e-109	6.66063e-107	0.138726	327.395
HS3ST3B1	3.07025	5.36135e-52	2.70289e-50	0.203835	75.6723
FOSL1	3.06884	4.03321e-100	9.05311e-98	0.144935	211.758
FAM46A	3.06825	3.62624e-06	1.41852e-05	0.710771	8.85177
GPR4	3.06788	1.87101e-05	6.63868e-05	0.780503	7.23744
PRSS57	3.06594	0.000382336	0.00109775	0.983399	5.67064
KLF4	3.06187	2.69568e-16	2.78352e-15	0.381577	35.3263
LOC103221995	3.06105	1.5978e-23	2.59487e-22	0.31143	44.2628
SLC23A2	3.05734	3.53188e-69	2.97293e-67	0.174788	119.1
CCDC125	3.05289	0.000111909	0.000352614	0.884498	5.35771
CPEB2	3.04747	2.39958e-118	9.6264e-116	0.132166	207.29
DIO2	3.04447	0.00336332	0.00799892	1.33106	2.96619
OIT3	3.03781	0.000526838	0.00147229	1.01357	4.66794
LOC103225513	3.03658	0.00321983	0.0076916	1.31937	2.99267
PPRC1	3.03473	7.05342e-145	4.92564e-142	0.118636	267.061
GPCPD1	3.03365	1.73804e-13	1.47014e-12	0.424109	30.0517
NHLH1	3.03045	1.92652e-06	7.86245e-06	0.687483	7.61438
LOC103233740	3.02953	6.81623e-10	4.18632e-09	0.514163	12.2247
TAF4B	3.02884	1.52587e-58	9.62219e-57	0.189084	129.091
PTPN21	3.0284	7.41414e-89	1.18469e-86	0.152223	134.464
SOX2	3.02599	7.29206e-05	0.000236566	0.838624	7.60251
LOC103214943	3.02074	0.00398952	0.00932471	1.43947	2.67695
LOC103241059	3.01785	9.44967e-05	0.000301376	0.874829	5.7512
LOC103235873	3.01771	0.000998998	0.00264738	1.13391	4.17884
UNC80	3.01768	4.63516e-06	1.78834e-05	0.708813	10.1191
FAM179A	3.01154	3.94036e-07	1.76348e-06	0.625215	18.6256
CDYL2	3.00866	6.00722e-15	5.652e-14	0.396905	18.7375
RYR1	3.00792	8.4108e-26	1.57016e-24	0.290382	43.2171
LOC103232992	2.99694	1.97246e-06	8.03778e-06	0.678623	8.74918
ZC3H12A	2.99654	1.26042e-69	1.07535e-67	0.170689	164.96
LOC103234827	2.99477	3.38577e-10	2.13865e-09	0.498181	10.8821
C1H11orf48	2.99185	1.83909e-13	1.55289e-12	0.418191	22.82
CPA4	2.99185	4.01032e-38	1.26658e-36	0.2341	50.2786
LOC103224158	2.98982	0.000531419	0.00148443	1.04297	3.53871
INSM2	2.9857	2.58085e-09	1.49729e-08	0.525191	12.5795
NFIL3	2.98464	8.46114e-86	1.2086e-83	0.152539	205.267
LOC103221942	2.98456	5.13606e-05	0.000170344	0.822124	7.58313
LOC103243157	2.98369	6.88529e-15	6.4524e-14	0.393406	18.9432
NR6A1	2.98331	3.85767e-47	1.68371e-45	0.208468	71.2413
EAF2	2.97751	0.000969043	0.00257487	1.08673	3.71258
HSPA4L	2.97679	8.29756e-132	4.34585e-129	0.122194	216.39
LOC103229720	2.97444	0.000551098	0.00153508	0.99649	5.08415
GHSR	2.97273	0.00169674	0.00430059	1.21038	2.84109
URB2	2.96916	4.7973e-53	2.4714e-51	0.194999	90.4513
NFASC	2.96788	3.70369e-70	3.24805e-68	0.168414	93.6374
MYO15A	2.96703	3.99898e-06	1.5553e-05	0.696089	7.34884
ASIC2	2.96374	2.32265e-05	8.12647e-05	0.790237	5.37129
XKR7	2.96081	0.00389978	0.0091376	1.35922	2.53188
PLEKHA4	2.96064	7.98753e-115	2.78898e-112	0.130402	300.921
LOC103228087	2.9562	0.000366731	0.00105616	0.931939	7.77411
LOC103235011	2.95617	4.14631e-08	2.09426e-07	0.572821	10.311
CPLX4	2.95413	1.25621e-07	5.98733e-07	0.591875	11.4724
WBSCR27	2.95053	0.00362527	0.00855715	1.3422	2.96637
BEGAIN	2.94945	5.52871e-07	2.43106e-06	0.632603	8.50685
MPP4	2.94928	3.16688e-05	0.000108685	0.779415	8.52383
LCN2	2.94783	2.76773e-20	3.73455e-19	0.326116	25.8869
LOC103214223	2.94721	5.43485e-05	0.000179464	0.822984	4.66476
ABCB4	2.94145	1.48115e-17	1.6773e-16	0.351113	52.1813
LONRF1	2.94075	1.09113e-64	8.00514e-63	0.174144	108.357
DUSP4	2.93643	1.9876e-20	2.71961e-19	0.322562	35.0412
ENC1	2.93641	5.00255e-36	1.4489e-34	0.236741	59.5744
MYH3	2.93461	0.00188165	0.00472103	1.0923	7.01195
PHLPP2	2.93354	2.64702e-102	6.31767e-100	0.137038	172.018
HIVEP1	2.92907	2.96387e-206	6.98547e-203	0.0957468	635.579
LOC103227366	2.92427	9.41741e-08	4.55529e-07	0.580922	10.624
HOXA11	2.9233	0.000457669	0.00129335	0.991251	4.24199
TSC22D2	2.91912	1.57938e-219	4.96322e-216	0.0924618	643.667
LOC103222008	2.9161	0.00263037	0.00640771	1.18875	4.67587
RHOQ	2.91517	2.2925e-39	7.69131e-38	0.223931	54.8332
TMEM150B	2.91457	1.70809e-05	6.0973e-05	0.74263	7.04679
NANOS1	2.90852	1.83559e-36	5.36591e-35	0.233268	54.3784
HRH1	2.90534	1.54407e-05	5.54015e-05	0.738285	8.62846
RASD1	2.9052	7.5744e-11	5.06617e-10	0.465512	12.677
LOC103225105	2.90026	0.00114501	0.00300558	1.08093	3.99267
MYH11	2.89929	1.23802e-11	8.97802e-11	0.443788	16.0857
STARD13	2.89776	1.05071e-124	4.9528e-122	0.12233	298.866
RTN4R	2.89766	0.000789602	0.00213356	1.01029	5.09655
LOC103214221	2.89703	1.17147e-07	5.60611e-07	0.580601	10.6699
LOC103242966	2.89664	1.20241e-06	5.06059e-06	0.639887	9.84711
LAMC2	2.88988	1.5028e-05	5.40029e-05	0.735968	7.36273
DGKH	2.88691	6.26242e-29	1.38915e-27	0.262469	41.4098
LOC103225539	2.8853	2.73352e-09	1.58197e-08	0.506515	18.5758
GLT8D2	2.87978	3.47805e-06	1.3648e-05	0.674785	7.09608
JPH1	2.87951	2.24996e-49	1.0659e-47	0.196434	91.0527
LURAP1L	2.87912	9.46694e-10	5.73952e-09	0.492768	11.738
MYADML2	2.87906	1.94768e-09	1.14618e-08	0.504402	9.32571
ARHGAP31	2.87865	2.02801e-29	4.64055e-28	0.258984	51.0125
LOC103229724	2.87505	0.000420245	0.00119603	0.954184	4.75033
NOVA2	2.87496	1.83022e-06	7.48727e-06	0.648264	9.51933
NGF	2.86673	3.0911e-16	3.17443e-15	0.359549	24.7477
BOLL	2.86636	0.000537915	0.00150058	0.940616	7.55604
MYO10	2.86249	2.83223e-166	3.8144e-163	0.104333	396.26
RRP12	2.85738	4.11638e-98	8.34562e-96	0.136372	204.581
GADD45B	2.85537	1.58549e-91	2.69319e-89	0.141159	330.839
SMCO2	2.85102	6.92065e-05	0.000225408	0.795094	7.17751
KIF4B	2.84756	9.90509e-06	3.65552e-05	0.702629	7.53327
LOC103235015	2.84327	9.23449e-13	7.3872e-12	0.410753	23.0716
LOC103241640	2.84269	8.20629e-08	3.99612e-07	0.564195	8.3221
MTHFD2	2.84066	2.37157e-73	2.29975e-71	0.157668	121.603
SKIDA1	2.83962	8.85497e-34	2.39886e-32	0.23683	59.4778
TMEM238	2.83339	2.99676e-09	1.72624e-08	0.501888	14.5708
LOC103238978	2.82971	1.14156e-05	4.17783e-05	0.706186	6.97335
LOC103242999	2.82884	0.00108004	0.00284733	1.07442	3.54327
LOC103238039	2.82381	3.5658e-11	2.46909e-10	0.444768	12.9584
TNFRSF10D	2.82353	3.44611e-15	3.30669e-14	0.367523	28.494
LOC103230040	2.8184	0.00206771	0.00514541	1.15862	3.01001
SLC7A5	2.81681	6.40272e-172	1.09748e-168	0.100992	315.544
KLHL29	2.81616	7.42271e-55	4.11633e-53	0.181883	82.0551
N4BP3	2.8156	5.25486e-19	6.6186e-18	0.322993	29.8313
LOC103235532	2.81547	2.05577e-11	1.45338e-10	0.434925	24.4367
LOC103222861	2.81505	0.00253571	0.00620436	1.21898	2.88686
PMEPA1	2.80558	2.23253e-95	4.20944e-93	0.13596	166.417
HIVEP3	2.80539	5.3191e-107	1.51957e-104	0.128004	203.568
SEMA7A	2.80381	1.65492e-66	1.26843e-64	0.163749	151.418
CARD11	2.80351	0.000462102	0.00130414	0.936228	5.01879
LOC103220451	2.8023	5.35257e-05	0.000176933	0.764139	10.1257
CEACAM19	2.80085	2.0676e-25	3.76299e-24	0.272859	37.265
LOC103216760	2.7931	8.67933e-15	8.06947e-14	0.369376	26.06
CKM	2.79108	0.000380132	0.00109259	0.923969	4.26729
CPN2	2.7886	0.00174356	0.00440681	1.10067	3.64257
LOC103244492	2.78709	0.00399067	0.00932586	1.34189	2.51581
E2F3	2.78371	5.96776e-55	3.31924e-53	0.179288	102.826
HMOX1	2.7765	1.67391e-72	1.55475e-70	0.154923	165.541
LOC103219513	2.7747	7.09024e-06	2.66839e-05	0.67427	8.69405
DMGDH	2.77376	0.00312639	0.00749022	1.25528	2.69311
LOC103240995	2.77095	2.17269e-05	7.63864e-05	0.727794	5.85749
HSPB8	2.76991	4.99114e-21	7.05457e-20	0.300916	31.3591
RBM20	2.76674	8.71346e-05	0.000279646	0.798416	5.00563
PLEKHM1	2.75985	1.56813e-159	1.64261e-156	0.102799	300.276
LOC103214858	2.75973	0.003325	0.00791677	1.26464	2.66637
PIM3	2.75944	1.07186e-103	2.69466e-101	0.128049	284.524
LOC103245629	2.75922	0.00157458	0.00401415	1.06149	4.00907
ARVCF	2.75805	2.95289e-97	5.86071e-95	0.132378	190.442
LHFP	2.75758	0.000130297	0.00040614	0.824268	5.02447
LOC103229721	2.75353	1.35793e-07	6.43795e-07	0.553036	12.5253
LOC103241951	2.75331	0.000478003	0.00134619	0.962148	4.23329
LOC103240624	2.75224	0.00142544	0.00366466	1.09607	3.07212
LOC103220123	2.74817	0.000779869	0.00210937	0.972223	4.64655
EGR3	2.74567	4.51203e-16	4.57143e-15	0.346614	24.6875
MCIDAS	2.73837	2.72121e-08	1.39881e-07	0.52322	10.5397
MUC5AC	2.73744	9.9925e-09	5.41404e-08	0.504409	16.736
SYNJ1	2.73572	2.37842e-73	2.29975e-71	0.151759	130.404
LOC103246493	2.73455	2.11568e-07	9.79884e-07	0.563951	8.01473
GSG2	2.72474	4.49e-14	3.9802e-13	0.371448	24.8406
MYOM1	2.72436	9.93361e-09	5.38368e-08	0.499607	13.815
CAPN11	2.71983	0.000423182	0.00120385	0.887393	5.69867
DBF4	2.71831	2.10063e-33	5.63406e-32	0.228209	71.5902
IL1RL1	2.71582	0.000667927	0.00182999	0.948916	4.39071
RNASE13	2.71423	0.000571929	0.00158818	0.915267	5.48375
OVOL1	2.71412	1.20416e-05	4.38223e-05	0.67796	8.08242
TNNT3	2.71375	0.00253664	0.00620526	1.13589	3.56234
ZNF57	2.70383	6.52358e-07	2.84398e-06	0.582592	9.19703
LOC103231014	2.70326	0.0028416	0.00686637	1.17343	3.20264
KLHL21	2.69634	7.58543e-105	2.01441e-102	0.124468	194.11
ISLR2	2.69575	0.000665221	0.00182334	0.94325	5.42187
LOC103233184	2.69361	7.11279e-05	0.000231147	0.768392	5.16708
LOC103240046	2.69095	9.30506e-05	0.000297166	0.761856	9.34553
C17H6orf25	2.68848	0.00357014	0.00844076	1.10415	8.12123
DDIT4	2.68668	1.56806e-131	7.99075e-129	0.110424	240.227
SRXN1	2.6827	1.39021e-15	1.36381e-14	0.344665	21.4732
SOWAHC	2.68206	1.20561e-85	1.70916e-83	0.137275	140.842
CHST6	2.68157	0.000169041	0.000516741	0.82228	4.7189
HIC2	2.68113	2.90579e-107	8.42902e-105	0.12241	187.023
LOC103248952	2.68104	0.000691983	0.00189147	0.93335	5.27894
IRX5	2.67664	1.39424e-10	9.14695e-10	0.435226	14.7091
LOC103241820	2.67642	1.07179e-40	3.78437e-39	0.202091	107.306
TIAM1	2.67533	1.85097e-11	1.3152e-10	0.412676	18.901
TGIF2	2.6699	5.02773e-38	1.5826e-36	0.209222	60.4273
LOC103220375	2.66621	0.000396663	0.00113543	0.857165	7.46523
GPR3	2.66495	4.75077e-06	1.82845e-05	0.633528	7.87652
LOC103229921	2.66284	0.00363972	0.00858746	1.25834	2.81538
HPS5	2.65908	1.68749e-57	1.01653e-55	0.167331	120.463
INSIG1	2.65667	2.8586e-48	1.31461e-46	0.183184	125.68
LOC103227009	2.65605	3.47362e-07	1.56612e-06	0.559032	8.69028
MATN4	2.65536	0.00416858	0.00969275	1.12892	5.44211
RASD2	2.65406	3.61566e-27	7.30689e-26	0.249615	41.7165
PALLD	2.64102	4.22885e-47	1.83721e-45	0.184664	92.915
TMC8	2.64093	4.08512e-05	0.000137667	0.719082	6.26694
TUFT1	2.64078	4.12883e-116	1.52645e-113	0.115662	271.89
LOC103244533	2.63995	0.00158733	0.00404393	0.993956	5.20286
SRGAP1	2.63769	2.5452e-59	1.62127e-57	0.16335	109.367
PLEKHG7	2.63762	2.85664e-18	3.4133e-17	0.30931	30.2283
LOC103236729	2.63368	5.59767e-12	4.18992e-11	0.397874	21.4901
YOD1	2.62547	1.87906e-73	1.83574e-71	0.145527	181.497
ATP8B1	2.61957	7.85185e-31	1.88354e-29	0.229651	93.5135
MSX1	2.61843	1.96077e-25	3.58239e-24	0.25509	38.1834
LOC103233476	2.61799	2.16547e-14	1.94892e-13	0.352574	18.9689
TRIM36	2.61664	5.06273e-15	4.79687e-14	0.343607	31.7226
IGF2BP1	2.61611	2.74241e-07	1.25383e-06	0.546184	8.37046
EOMES	2.61481	7.67225e-10	4.68459e-09	0.444507	19.1452
MYBL1	2.61301	6.95359e-22	1.02993e-20	0.276421	39.2715
ZAN	2.61092	0.000621344	0.00171253	0.910957	4.00312
CELSR3	2.60837	7.98322e-146	6.02094e-143	0.101691	318.625
CCNJ	2.60768	1.24829e-38	4.03022e-37	0.202777	67.457
MAP2K3	2.60206	5.48896e-106	1.54469e-103	0.119433	257.436
ARHGEF15	2.59968	0.000171696	0.000524265	0.793099	6.82754
LOC103221443	2.59873	0.000132334	0.000411809	0.767556	6.77295
FAM110A	2.59639	1.22576e-06	5.15311e-06	0.57578	10.0737
DNAH12	2.59564	2.00504e-09	1.17773e-08	0.452777	15.1156
VWF	2.59537	8.10836e-05	0.000261339	0.747005	6.83399
LOC103243192	2.5945	0.00062299	0.00171632	0.871784	7.34705
FOXD1	2.59366	1.51926e-64	1.1103e-62	0.153735	139.661
ASAP2	2.59047	1.50129e-91	2.57336e-89	0.128234	212.65
LOC103230137	2.58706	0.00329494	0.00785114	1.13139	3.6865
BCL11B	2.58475	9.13311e-07	3.90045e-06	0.567102	9.82477
LGALS12	2.58344	5.46619e-09	3.05378e-08	0.466135	10.6906
DNAH2	2.5796	2.15716e-34	5.93771e-33	0.213261	71.9732
ADCY10	2.57653	9.26649e-13	7.40965e-12	0.37275	39.1929
MOV10L1	2.56856	4.60674e-05	0.000153925	0.69811	8.47441
GZF1	2.56641	3.12041e-53	1.62979e-51	0.168282	127.173
DDIT3	2.56588	3.70532e-68	2.97293e-66	0.147881	227.093
LOC103222764	2.56567	0.00274836	0.00666756	1.06719	3.86084
LOC103238722	2.5654	2.26254e-05	7.93237e-05	0.676747	6.83717
TNNC2	2.56499	0.000659165	0.00180805	0.905893	4.19047
PPP1R3C	2.5601	8.81456e-29	1.9303e-27	0.232977	51.4966
LOC103220145	2.55986	0.000484806	0.00136331	0.867944	4.07079
PRKCE	2.55974	2.83475e-26	5.40437e-25	0.244625	53.2604
SIK1	2.54779	6.3245e-153	5.42038e-150	0.0969467	399.793
HOXC12	2.54748	0.0030846	0.00740326	1.08427	3.83902
IGFN1	2.54587	5.61286e-14	4.93612e-13	0.349004	19.1392
TMEM170B	2.54301	1.00532e-26	1.9745e-25	0.24102	44.9205
LOC103221088	2.543	1.97993e-06	8.06645e-06	0.576379	10.083
SLC1A4	2.53746	8.75351e-69	7.17598e-67	0.145568	103.725
LOC103218674	2.53669	1.44911e-54	7.89681e-53	0.164264	140.553
IL18RAP	2.53485	0.00190203	0.00476836	0.972552	8.00304
KLF5	2.53285	3.22935e-60	2.12158e-58	0.155631	151.33
ACSL1	2.53208	2.03939e-31	5.02649e-30	0.219614	62.66
FUT1	2.52996	4.59027e-06	1.77174e-05	0.6057	6.86047
PANX1	2.52849	4.04451e-31	9.87813e-30	0.220409	53.1223
HOMER1	2.52732	3.42788e-67	2.67077e-65	0.146654	138.047
DUSP16	2.52703	2.41086e-169	3.49667e-166	0.0913102	542.109
LOC103222355	2.52535	0.00380081	0.00892789	1.11635	4.3388
MEX3B	2.52181	3.22474e-11	2.24612e-10	0.395498	17.8015
LOC103221019	2.51789	0.0036916	0.00869738	1.11424	3.35465
TIPARP	2.51683	2.79229e-57	1.66084e-55	0.158888	156.025
NABP1	2.51626	1.44642e-38	4.65395e-37	0.195625	74.0445
PRKAG2	2.51508	2.63912e-88	4.14671e-86	0.126775	197.647
MUC2	2.51292	5.38468e-05	0.000177901	0.689466	8.96071
LOC103218142	2.51163	0.00024087	0.000717021	0.783759	5.98197
SLC16A11	2.51106	0.000169499	0.00051789	0.765849	4.6932
GCNT1	2.50688	0.000273623	0.000805364	0.790747	6.35247
LOC103245520	2.50571	0.0024746	0.00606587	1.05376	3.6005
LOC103231721	2.50506	0.000131925	0.000410807	0.746175	6.17412
LOC103221652	2.50282	0.000882217	0.00235812	0.902456	4.34302
CCDC19	2.50224	3.33035e-08	1.69851e-07	0.475737	20.2649
SPRY4	2.50123	2.97561e-34	8.14298e-33	0.20731	61.1415
CACNA1E	2.50092	0.00221062	0.00547071	1.03205	3.61266
KIAA1432	2.49517	1.67466e-99	3.54784e-97	0.118309	188.75
MARCKSL1	2.49492	6.33232e-08	3.12882e-07	0.486759	15.2953
C23H5orf45	2.49473	1.41335e-38	4.55533e-37	0.193734	86.308
LOC103237241	2.49276	0.00310879	0.00745184	1.05011	4.37719
TMEM132B	2.49145	7.02088e-12	5.20357e-11	0.37698	23.5218
ZNF597	2.49076	4.19123e-06	1.6257e-05	0.591556	10.1235
LOC103246766	2.49001	0.000291257	0.000854068	0.773024	10.1443
EFNB2	2.48719	1.21298e-37	3.75547e-36	0.196048	74.7431
FAM160A1	2.48349	7.31947e-40	2.48664e-38	0.18955	95.4258
CCDC85B	2.48309	7.55214e-50	3.59585e-48	0.168645	111.751
LOC103235515	2.48168	6.45954e-25	1.15227e-23	0.244416	48.0248
TSHR	2.47972	0.001818	0.00457411	0.975236	4.12811
LOC103244696	2.47953	0.00011111	0.000350389	0.726754	5.90797
USPL1	2.4779	5.46093e-45	2.24326e-43	0.177226	139.545
EPHB6	2.47726	0.00234635	0.00577979	1.05179	3.0678
ORAOV1	2.475	4.5269e-13	3.70624e-12	0.354104	20.7046
LOC103237450	2.47179	5.63648e-38	1.77126e-36	0.19378	94.788
NLRP9	2.46655	0.00124086	0.00322844	0.908923	5.57689
LOC103235013	2.46463	0.00187706	0.00471013	0.985082	5.06994
LOC103230655	2.46189	2.48146e-05	8.64842e-05	0.650458	6.32005
LOC103243143	2.45964	0.000580306	0.00160907	0.827519	7.52585
KDM7A	2.45549	1.93573e-37	5.92502e-36	0.19378	82.8014
COLEC11	2.45534	0.00236655	0.00582447	0.967921	6.64643
EFNB3	2.45456	0.000314531	0.000917039	0.783829	5.63992
ZCCHC2	2.44369	6.92654e-103	1.71532e-100	0.11376	230.425
FSTL4	2.44147	2.14386e-10	1.38718e-09	0.400625	19.3258
ARL13B	2.44065	1.10204e-48	5.13059e-47	0.167674	107.844
PPM1D	2.43921	5.39993e-133	2.99458e-130	0.0996704	390.745
LOC103229024	2.43909	0.000460219	0.00129921	0.830038	5.52052
FAM72A	2.43716	9.15444e-09	4.98e-08	0.445931	17.6942
ZBTB7C	2.43501	9.05022e-06	3.35777e-05	0.597964	8.77835
LOC103221948	2.43463	6.39876e-24	1.05925e-22	0.245325	57.2977
ZNF821	2.43278	4.71914e-31	1.14812e-29	0.212267	73.6468
KLK14	2.43063	0.00226672	0.00560143	1.00002	4.00404
LOC103242877	2.42833	0.00212919	0.00528166	0.984983	4.75827
MEX3C	2.42508	1.33914e-99	2.86926e-97	0.114941	213.448
SERPINE1	2.42346	3.63674e-144	2.44896e-141	0.0950512	1419.13
MARCH4	2.42298	1.83822e-08	9.64642e-08	0.454279	12.3706
RGS20	2.42262	4.83871e-06	1.86153e-05	0.575974	8.75475
NAT16	2.42252	2.70518e-50	1.2913e-48	0.163569	127.216
HLX	2.42214	7.19216e-22	1.06359e-20	0.256355	56.4195
C10H2orf54	2.42011	0.00373575	0.00878968	1.1053	2.89186
FBXL14	2.41863	4.77171e-51	2.33084e-49	0.162447	85.9111
AGTPBP1	2.41516	3.15117e-23	5.05232e-22	0.247143	53.8677
CDKN1A	2.41222	1.59983e-89	2.60042e-87	0.120674	196.458
KIAA1841	2.41202	1.24539e-16	1.32442e-15	0.299055	29.3655
UAP1	2.40973	2.99755e-68	2.4257e-66	0.138744	152.697
SESN2	2.40949	1.63051e-97	3.27055e-95	0.115835	176.17
LOC103244502	2.40881	2.33176e-06	9.40031e-06	0.544017	25.7473
LOC103220594	2.40772	9.7954e-07	4.16349e-06	0.529766	13.6041
P2RX5	2.40533	0.000117083	0.000367751	0.70615	6.58387
ISG15	2.40443	9.41902e-06	3.48842e-05	0.587211	16.5888
NFKBIE	2.40429	5.16699e-29	1.15431e-27	0.217893	86.145
PKLR	2.40402	1.77964e-05	6.33595e-05	0.614217	9.38392
LOC103232455	2.40337	0.000530055	0.00148106	0.818144	6.3311
LOC103230546	2.40263	8.37108e-05	0.000269484	0.685528	6.90671
PAPD5	2.40114	9.29809e-76	9.84918e-74	0.130993	177.034
RLN3	2.3997	2.37318e-07	1.09351e-06	0.495009	13.4967
SLC7A1	2.3995	7.47848e-105	2.01438e-102	0.110802	248.938
ARID3A	2.39889	5.39577e-46	2.276e-44	0.169878	105.502
LOC103220101	2.39841	1.36725e-06	5.71353e-06	0.53538	9.50188
LOC103240799	2.39675	0.00373591	0.00878968	1.09819	3.55909
FBXO48	2.39577	4.02084e-06	1.56283e-05	0.56498	7.63114
CDR2L	2.39419	2.24223e-17	2.518e-16	0.288974	37.3157
NCR3LG1	2.39343	2.38419e-21	3.43947e-20	0.256707	37.35
MRPL18	2.39251	2.14102e-14	1.92876e-13	0.321792	29.2275
TEX14	2.39168	1.16574e-09	7.01789e-09	0.411539	14.9591
LOC103219219	2.39167	7.34919e-32	1.85253e-30	0.205887	66.3379
FNIP2	2.39101	6.87044e-109	2.0241e-106	0.108253	274.537
HIVEP2	2.39016	3.65605e-123	1.64131e-120	0.101516	510.224
RAP1GDS1	2.38996	3.13228e-34	8.54692e-33	0.19796	96.2499
DHX33	2.38989	4.50118e-27	9.03831e-26	0.224836	48.944
FOXC2	2.3879	1.51688e-11	1.09039e-10	0.367523	22.0694
LOC103246739	2.38766	1.78991e-05	6.3701e-05	0.616471	9.71443
C28H7orf43	2.38494	6.92064e-54	3.71762e-52	0.155422	96.1849
ANKRD44	2.38416	1.54427e-06	6.40501e-06	0.531842	12.8893
LOC103225801	2.38376	8.96142e-07	3.8306e-06	0.521856	10.9764
LARP6	2.38115	7.51332e-30	1.74034e-28	0.212331	54.4594
C16H17orf74	2.37973	0.000355417	0.00102625	0.776688	5.53812
KCNB1	2.37948	1.67995e-06	6.92358e-06	0.534268	11.9565
RHOU	2.37933	0.000739295	0.00201059	0.840412	5.51214
GYG1	2.37872	7.58262e-09	4.16217e-08	0.432208	19.5485
GPR176	2.37766	8.815e-13	7.06362e-12	0.343981	20.4639
CARD9	2.37609	1.89326e-09	1.11485e-08	0.415887	15.3401
TLL2	2.37546	3.28074e-05	0.00011247	0.629474	9.7435
GIMAP8	2.37485	0.00424648	0.00985411	1.04754	4.52109
GDF11	2.37367	2.01235e-19	2.60239e-18	0.268435	35.112
C22H3orf38	2.3734	1.32338e-23	2.16037e-22	0.240699	46.7784
MAFG	2.37333	3.92137e-118	1.50893e-115	0.103012	302.589
NES	2.37333	1.89811e-08	9.93031e-08	0.445817	14.6387
WDR62	2.37121	4.01675e-35	1.13377e-33	0.193672	68.6561
LOC103228468	2.37102	5.18572e-14	4.57971e-13	0.324254	31.9705
DNAJB5	2.36941	1.47607e-35	4.23612e-34	0.192346	95.6549
LOC103227406	2.36884	1.41614e-47	6.28265e-46	0.164782	109.745
ABTB2	2.36852	1.28649e-99	2.78812e-97	0.112269	274.211
LOC103215709	2.36848	1.15499e-09	6.95539e-09	0.406666	14.7873
IGFBP5	2.36839	0.00153446	0.00392035	0.920164	5.11821
KIAA1683	2.36597	4.21918e-48	1.91693e-46	0.163594	114.251
LCT	2.36506	3.44907e-05	0.000117727	0.630819	8.18265
LIF	2.36378	4.74993e-99	9.84176e-97	0.112388	226.29
SLC16A13	2.36316	2.39745e-19	3.0856e-18	0.268516	29.2769
LOC103241570	2.3628	0.00417925	0.00971319	1.08605	3.1842
LOC103234356	2.3602	0.000259806	0.000768607	0.740367	6.90538
FBXO33	2.35942	2.07432e-35	5.93493e-34	0.191984	68.2278
RAB39A	2.3583	4.48776e-10	2.80003e-09	0.394395	15.4942
FOXN2	2.35444	2.34019e-51	1.15812e-49	0.157225	112.022
PEA15	2.35413	1.06024e-58	6.70835e-57	0.146701	127.802
AGO2	2.35151	6.12934e-150	5.02472e-147	0.0903437	504.108
GPR155	2.34994	9.40483e-12	6.89724e-11	0.358147	21.2092
STX11	2.34543	0.0022981	0.00567378	0.939346	5.53653
C17H6orf10	2.34193	0.00213134	0.00528629	0.932559	5.12121
RRAGD	2.34124	4.47831e-12	3.37484e-11	0.349587	21.9875
EGR4	2.34111	0.00140727	0.00362041	0.893044	5.81817
ZBED4	2.33983	1.98916e-89	3.20561e-87	0.117255	173.91
JMJD6	2.33806	2.67648e-76	2.94299e-74	0.12704	179.051
ZBTB49	2.33743	3.08482e-18	3.6743e-17	0.274044	35.6632
UPP1	2.33284	1.73567e-25	3.18038e-24	0.226536	88.773
CCSAP	2.33056	1.32427e-20	1.8279e-19	0.254824	48.1232
NEK10	2.32985	2.54182e-05	8.84406e-05	0.612097	9.62064
SERTAD3	2.32757	4.00649e-33	1.0595e-31	0.196287	69.795
AMMECR1L	2.32696	5.87965e-73	5.54304e-71	0.129347	176.763
MARK1	2.32515	3.41072e-16	3.48748e-15	0.292016	36.3477
GNA13	2.32165	2.23694e-142	1.4544e-139	0.0916401	381.917
TMEM2	2.31975	2.45191e-92	4.32063e-90	0.114189	213.334
LIG4	2.31887	1.77729e-21	2.57577e-20	0.247839	40.8821
STAG3	2.3167	2.01073e-05	7.10369e-05	0.597559	10.8399
LOC103242995	2.31644	1.0372e-10	6.86187e-10	0.372186	19.7169
LOC103243832	2.31542	4.7334e-11	3.22895e-10	0.364023	33.8595
LOC103233524	2.31482	8.45776e-08	4.1069e-07	0.459461	10.3386
VDR	2.31367	1.14343e-26	2.23182e-25	0.219608	51.8613
OTUD1	2.31365	2.46556e-26	4.72439e-25	0.221177	46.3165
URB1	2.31305	4.14291e-56	2.3743e-54	0.14734	115.598
PER2	2.31245	2.25706e-60	1.49322e-58	0.141795	256.013
MED26	2.30946	1.17766e-33	3.18119e-32	0.193312	81.8934
LOC103222024	2.30588	1.41229e-18	1.73139e-17	0.267592	49.9888
SLC7A6	2.30074	4.91593e-27	9.82925e-26	0.216447	55.0406
RGMB	2.30064	3.44334e-16	3.51702e-15	0.289303	30.8697
ADAM12	2.29777	9.29535e-18	1.07524e-16	0.273831	32.5766
ZNF556	2.29489	0.000828223	0.00222706	0.813842	5.43559
TET3	2.29376	3.0883e-121	1.32341e-118	0.0982953	325.479
MYC	2.29229	2.58164e-121	1.13202e-118	0.0981822	422.247
LOC103243794	2.28746	1.6581e-06	6.83654e-06	0.515158	10.4127
ZNF778	2.28353	1.80814e-56	1.05224e-54	0.145165	117.491
HRC	2.28334	2.26927e-05	7.95446e-05	0.590792	9.10741
PRKCG	2.28258	1.00539e-13	8.67578e-13	0.315463	31.5621
LOC103241643	2.28246	0.000168982	0.000516647	0.69847	5.63717
RND3	2.28206	5.32694e-35	1.4991e-33	0.186664	87.8979
LPIN2	2.28189	2.57827e-70	2.27165e-68	0.12943	148.639
CLN8	2.28095	2.27598e-14	2.04625e-13	0.307034	29.5514
ITPRIP	2.27936	3.01417e-12	2.31119e-11	0.337836	24.7127
HSPB7	2.27747	0.000348072	0.00100735	0.73669	6.18767
LOC103224625	2.27587	0.000353333	0.0010207	0.744887	6.60809
PCDH10	2.27583	0.000176966	0.000539046	0.684777	8.43369
MN1	2.27575	7.40956e-15	6.92992e-14	0.300501	26.7194
LOC103241275	2.2752	1.75859e-10	1.14457e-09	0.370745	19.5839
LPXN	2.27138	7.10716e-09	3.91143e-08	0.412904	15.9325
LOC103222274	2.27013	1.35336e-09	8.09309e-09	0.39016	26.4648
BRPF1	2.2674	3.32019e-81	4.14584e-79	0.119368	220.273
HHLA3	2.26457	0.00236555	0.00582277	0.925667	3.83153
EPHA2	2.26357	3.50794e-145	2.54393e-142	0.0884742	778.034
CLIP2	2.26354	1.99667e-75	2.09151e-73	0.123753	161.516
METRNL	2.26232	6.66137e-37	1.99682e-35	0.17999	94.0552
FBXW7	2.25984	5.67756e-84	7.59222e-82	0.116867	233.991
SLC20A1	2.25966	2.87594e-61	1.95761e-59	0.137578	182.816
SLC5A3	2.25892	9.55977e-34	2.58608e-32	0.188482	84.4715
VPS37B	2.25835	9.28896e-57	5.43923e-55	0.143214	134.996
CDKN2D	2.2554	2.32208e-08	1.2025e-07	0.425041	14.4636
CRHR1	2.25173	4.59414e-05	0.000153586	0.613269	7.5521
LOC103221719	2.24861	0.000763158	0.00206952	0.798083	5.08478
SLC12A2	2.24834	2.02465e-20	2.76629e-19	0.247138	42.7087
CDKN2AIP	2.24729	3.12314e-31	7.64763e-30	0.195652	73.6466
DHX37	2.24659	1.73872e-60	1.15435e-58	0.137717	169.26
HES2	2.24617	3.8276e-05	0.000129498	0.604765	7.53522
SCN5A	2.2459	1.22393e-13	1.04896e-12	0.311948	22.5283
COL11A2	2.24439	7.72525e-09	4.23786e-08	0.408108	25.974
LOC103244007	2.24433	0.000780793	0.00211126	0.793421	5.51312
LOC103245610	2.24413	0.000408381	0.0011649	0.732678	6.0854
PPP1R18	2.23998	2.24694e-94	4.07366e-92	0.109097	310.35
ANGPT2	2.23976	0.000240936	0.000717104	0.68807	9.95594
RRAD	2.23918	8.15106e-05	0.00026267	0.632544	11.1377
MRGPRD	2.23877	0.000432322	0.00122781	0.744313	5.27116
FOXO1	2.23644	1.3372e-36	3.93951e-35	0.178737	95.594
NEDD9	2.23476	1.91651e-13	1.61754e-12	0.312749	40.1404
SH2D4B	2.23424	5.10977e-06	1.96102e-05	0.531183	11.9895
TMEM200A	2.23407	0.000122147	0.000382763	0.656885	6.70216
FKBP5	2.23346	3.69973e-20	4.97209e-19	0.247189	46.2736
CBFA2T3	2.22915	3.23069e-16	3.31058e-15	0.279601	28.5465
MCM10	2.22694	5.88596e-42	2.19328e-40	0.165439	98.9762
LOC103221937	2.22636	4.8693e-09	2.73246e-08	0.397794	20.5753
PTGIS	2.22392	2.37377e-10	1.52912e-09	0.364958	17.7018
TNR	2.22221	0.00242196	0.00594454	0.900119	4.83072
FAM53C	2.22194	7.28921e-86	1.04915e-83	0.113643	190.387
CAMSAP1	2.22142	1.64832e-109	5.09492e-107	0.100198	310.042
SOCS7	2.221	1.42494e-69	1.21024e-67	0.126572	143.713
PHF13	2.2198	3.18569e-42	1.19416e-40	0.164234	101.802
LOC103243440	2.2186	0.000877404	0.00234725	0.776877	6.91805
OSGIN1	2.21849	1.65343e-24	2.85227e-23	0.220316	46.0789
TMEM40	2.21768	1.31548e-09	7.87408e-09	0.381224	26.1146
LOC103241642	2.21646	3.76107e-10	2.3662e-09	0.369246	15.2056
LOC103244268	2.21624	7.07876e-05	0.000230121	0.623118	7.87518
SIAH2	2.21597	1.10308e-20	1.53269e-19	0.241965	42.9022
STK17A	2.21481	3.28153e-21	4.70877e-20	0.238321	47.4098
KRT80	2.21464	8.69482e-18	1.00887e-16	0.263596	31.5777
LOC103226649	2.21446	1.30193e-05	4.7144e-05	0.551195	12.3661
EEA1	2.21324	3.22653e-124	1.48381e-121	0.0935796	480.528
AKAP2	2.21291	6.28111e-96	1.19627e-93	0.10685	290.675
CCDC62	2.21181	1.83824e-07	8.57709e-07	0.450194	18.6275
LOC103243706	2.2101	1.65295e-06	6.81679e-06	0.496638	9.4548
CNR1	2.20766	0.000778028	0.002105	0.776787	5.84687
KLF2	2.20707	0.000413161	0.00117747	0.72684	4.97234
ITGAM	2.20637	0.000317413	0.000924439	0.697966	8.81472
LOC103240604	2.20632	0.00263596	0.00641967	0.885411	6.52228
ZNFX1	2.20431	1.16259e-99	2.54891e-97	0.104269	311.537
SLC16A9	2.20301	1.44686e-11	1.04164e-10	0.338152	21.4069
EPHB2	2.20198	4.45855e-75	4.61901e-73	0.120671	203.501
SRRM3	2.20121	2.12468e-09	1.2449e-08	0.383061	22.8919
CASZ1	2.19668	2.08136e-41	7.57606e-40	0.164344	120.415
PPP1R15B	2.1962	1.60904e-114	5.41758e-112	0.0968192	476.503
ZBTB2	2.19517	4.70696e-21	6.65789e-20	0.237734	66.4244
ATP1A2	2.19367	0.00309062	0.00741489	0.927277	4.21416
LOC103222001	2.19131	8.14296e-33	2.12948e-31	0.185618	78.8366
ZNF562	2.19081	3.5776e-19	4.5609e-18	0.249664	44.5007
RCAN1	2.1896	9.27689e-87	1.37729e-84	0.111335	264.294
PKNOX1	2.18273	2.5878e-19	3.32604e-18	0.24739	48.6481
NFKB2	2.18086	7.58512e-119	3.10907e-116	0.0943457	506.651
LOC103221945	2.18009	6.51286e-11	4.37322e-10	0.345731	32.5837
FOXC1	2.1791	2.97219e-40	1.02638e-38	0.165436	87.6664
CDC42EP3	2.17692	4.24173e-65	3.14873e-63	0.128425	178.723
LOC103231502	2.17659	7.1918e-08	3.52945e-07	0.428766	11.7174
FAM161A	2.17625	8.2313e-42	3.04316e-40	0.161979	81.3671
LOC103245181	2.17465	0.00281403	0.00680849	0.919681	3.90863
ACTA1	2.17464	1.86878e-08	9.79045e-08	0.405652	27.2432
RAB31	2.17431	9.71663e-10	5.88145e-09	0.371928	18.6818
NPC1	2.1734	3.20619e-64	2.32511e-62	0.129086	213.68
CACNA1I	2.17135	1.55569e-05	5.57864e-05	0.549669	8.48381
BTBD10	2.16958	1.36285e-36	4.00257e-35	0.173251	95.6242
LOC103230922	2.16801	0.00164688	0.00418377	0.841709	4.37379
SLC1A5	2.16788	1.02532e-16	1.09843e-15	0.266749	41.0832
CDK17	2.16577	4.49536e-46	1.90045e-44	0.153064	139.769
XBP1	2.16286	8.34817e-58	5.094e-56	0.135699	126.904
GADD45A	2.16031	4.39883e-48	1.99375e-46	0.149364	142.814
PIK3CD	2.15993	2.49352e-84	3.35823e-82	0.111446	241.692
LOC103220067	2.15834	0.000211993	0.00063598	0.666354	5.19129
ACTR3B	2.15716	8.42744e-21	1.17791e-19	0.234714	56.8736
CCNE1	2.1565	2.6937e-19	3.45744e-18	0.244699	46.2108
TRANK1	2.15519	4.65931e-09	2.62165e-08	0.384113	23.4675
LOC103229379	2.1548	0.00266478	0.00648398	0.894692	4.35533
LOC103232626	2.15467	0.00120884	0.00315515	0.773949	11.4355
TEX101	2.15263	2.50228e-12	1.93283e-11	0.316961	23.3732
HAP1	2.15248	1.9489e-05	6.89947e-05	0.55207	11.4005
SLC4A7	2.1495	1.48349e-53	7.87922e-52	0.140445	124.003
NUAK1	2.14915	4.2169e-65	3.14267e-63	0.126722	173.587
LOC103229355	2.14886	3.56365e-15	3.41599e-14	0.279608	31.6217
FAM171B	2.14802	3.51992e-12	2.67937e-11	0.317758	55.5377
ARNTL2	2.14571	7.83939e-33	2.05579e-31	0.181723	77.9354
LOC103238239	2.14072	0.000359674	0.00103759	0.68787	7.00406
LOC103221002	2.13903	3.05669e-05	0.000105152	0.560916	12.1007
ZNF627	2.13895	2.83066e-18	3.38655e-17	0.250603	42.1462
LOC103217586	2.13859	0.000318328	0.00092696	0.680784	5.75547
ZNF165	2.13828	0.000400477	0.00114513	0.699218	6.14963
LOC103228082	2.13756	0.000874151	0.00234021	0.761547	5.29455
ZBTB10	2.13667	2.40046e-99	5.02895e-97	0.101295	408.904
CBL	2.13394	1.96614e-61	1.34805e-59	0.129828	157.394
DEPDC5	2.13244	3.99616e-102	9.41845e-100	0.0997245	263.909
CELF2	2.13167	0.000192219	0.000581748	0.650162	5.9069
SUV39H2	2.12775	3.23572e-19	4.13904e-18	0.242119	47.3845
PHOSPHO1	2.12743	6.83868e-07	2.9731e-06	0.456742	12.7081
IGSF9B	2.12665	5.71995e-26	1.0742e-24	0.204745	50.9816
ABHD5	2.12648	1.36424e-28	2.96003e-27	0.193905	86.979
LOC103221947	2.12553	1.5727e-15	1.53643e-14	0.27292	44.8378
LOC103243846	2.12252	3.41025e-09	1.95323e-08	0.374998	19.4799
FKBP4	2.11986	1.52008e-90	2.49228e-88	0.105535	283.071
FAM109B	2.1195	7.59758e-05	0.000245927	0.598527	7.59119
GP1BA	2.11726	4.79131e-05	0.000159499	0.572585	13.6811
NAV2	2.11332	7.00503e-103	1.71532e-100	0.0984289	460.766
LOC103220109	2.1127	5.60733e-07	2.46391e-06	0.449709	12.3676
KIF26B	2.11075	7.07492e-06	2.66422e-05	0.50946	11.3969
UBE2F	2.10998	1.98648e-15	1.92968e-14	0.272013	36.0629
CCDC117	2.10646	5.49363e-49	2.57028e-47	0.14413	109.984
CASQ1	2.10618	0.00159866	0.00407059	0.796301	6.28127
TMTC2	2.10579	0.00254723	0.00622771	0.876571	4.50462
BTG2	2.1033	1.03237e-25	1.91967e-24	0.203304	68.7561
RDH12	2.10081	0.000448047	0.00126769	0.687637	6.51344
LOC103246942	2.09939	0.00305438	0.00733728	0.892721	4.51971
PPARG	2.09723	2.42339e-54	1.31302e-52	0.135904	221.635
JUN	2.09642	1.94448e-93	3.45879e-91	0.102678	1329.91
APOLD1	2.09464	0.00427843	0.00992126	0.905132	6.14538
LOC103215364	2.09406	7.3312e-10	4.48507e-09	0.354922	24.9658
LOC103225990	2.09333	0.000178656	0.000543491	0.623259	10.9047
CHIC2	2.09325	1.1207e-15	1.10748e-14	0.267171	37.5877
STAM	2.09301	7.48675e-45	3.04887e-43	0.150111	169.616
INTS6	2.09237	6.03942e-45	2.47014e-43	0.14979	139.234
LCMT2	2.09087	2.65661e-05	9.21964e-05	0.549906	8.97085
PNCK	2.08884	0.00281672	0.00681411	0.874303	4.29676
LOC103233780	2.08784	6.8474e-07	2.97621e-06	0.44802	13.3246
KDM6B	2.08773	3.55254e-171	5.58192e-168	0.0750359	719.074
PLCH2	2.08524	2.6042e-18	3.12554e-17	0.243639	45.3366
MARS2	2.08411	3.07154e-13	2.55353e-12	0.29409	29.5378
DOCK9	2.08301	1.65778e-41	6.09307e-40	0.155617	162.936
C15H3orf58	2.08272	4.42795e-24	7.40808e-23	0.208718	58.9956
NIPAL1	2.08096	1.19505e-06	5.03187e-06	0.460855	12.8445
EAF1	2.08086	7.31247e-57	4.30864e-55	0.131643	163.075
LOC103233820	2.08037	8.36855e-28	1.74739e-26	0.192491	91.2513
DNAJA1	2.0797	2.85851e-88	4.45431e-86	0.10487	318.729
DYRK3	2.07852	3.45393e-12	2.63021e-11	0.308124	28.6531
CHORDC1	2.07692	1.29567e-45	5.40483e-44	0.147612	161.363
CDON	2.07582	3.65843e-15	3.50151e-14	0.270331	34.9497
LOC103233298	2.07523	0.000103897	0.000329183	0.594282	8.70644
MGAT5B	2.07305	4.47437e-06	1.72949e-05	0.486544	13.232
C1H11orf24	2.07301	8.76379e-24	1.44316e-22	0.20916	53.2922
RGS2	2.07276	2.22702e-18	2.69342e-17	0.241496	67.4541
SQLE	2.07239	8.02219e-17	8.65818e-16	0.25396	51.1243
THBS1	2.07198	4.6439e-69	3.89159e-67	0.118644	183.299
ZIC5	2.0719	3.24121e-13	2.69102e-12	0.293109	30.6064
ABL2	2.07161	3.21721e-118	1.26376e-115	0.0898993	395.531
HERC4	2.0702	3.40735e-65	2.54943e-63	0.121988	166.298
KCNIP3	2.06875	0.000447759	0.00126726	0.684063	7.28282
CDC25A	2.06721	1.08177e-17	1.24446e-16	0.246586	38.3536
EIF2AK3	2.06682	3.06923e-46	1.30633e-44	0.145936	155.128
LOC103216190	2.06385	1.73986e-23	2.82316e-22	0.209634	65.3376
TBPL1	2.06319	1.24435e-10	8.19498e-10	0.333408	23.322
FLNC	2.05939	3.57411e-140	2.24633e-137	0.0819866	1467
CEP95	2.0592	7.72191e-42	2.86044e-40	0.153098	105.412
DTNA	2.05778	6.37817e-25	1.13883e-23	0.202246	59.8311
KLLN	2.05633	1.44201e-05	5.18976e-05	0.517725	10.3541
CACNA1A	2.05588	5.27641e-10	3.27259e-09	0.343932	21.1758
SPAG9	2.05568	1.80318e-161	1.99994e-158	0.075998	631.242
ADCY7	2.05435	5.51659e-56	3.14246e-54	0.131043	120.031
YTHDF1	2.05341	9.10327e-62	6.26431e-60	0.124508	168.511
RAPGEF6	2.05333	8.42252e-67	6.4819e-65	0.119344	257.073
ZNF14	2.05091	0.000162588	0.00049847	0.613276	6.60751
BCAS1	2.04909	0.000159157	0.000488825	0.604622	10.6706
AREG	2.04893	2.48923e-07	1.14335e-06	0.419612	20.1685
FNIP1	2.04589	5.8156e-100	1.29004e-97	0.0967013	362.603
SERAC1	2.04573	1.97216e-18	2.40214e-17	0.238001	44.9492
ZNF441	2.04284	4.30877e-08	2.16992e-07	0.392531	14.2043
KLF10	2.04194	2.69735e-61	1.8427e-59	0.124259	264.517
RNF24	2.04189	8.99542e-10	5.46595e-09	0.348263	21.3219
FGF18	2.04178	0.000186772	0.000566445	0.608676	13.8907
LOC103220395	2.0412	0.00020045	0.000604718	0.61762	7.63106
KLHL18	2.03678	3.9795e-21	5.67576e-20	0.219639	59.8156
BNIP2	2.03631	1.88255e-28	4.07058e-27	0.186222	67.1837
TMEM95	2.0357	0.000553887	0.00154171	0.679488	6.58652
HCN3	2.0355	8.19665e-18	9.52822e-17	0.241807	38.075
YRDC	2.03425	8.07535e-08	3.93438e-07	0.400055	14.1881
LOC103240069	2.03335	1.1569e-16	1.23448e-15	0.250368	50.2698
ZBTB17	2.03249	1.68456e-46	7.23517e-45	0.142846	238.523
ABHD15	2.02924	1.62383e-11	1.16194e-10	0.311257	21.8725
DOCK3	2.02785	1.70825e-11	1.21773e-10	0.311837	22.8837
LOC103221726	2.02635	9.63396e-06	3.56176e-05	0.494968	11.2407
TNFRSF10B	2.02334	1.57111e-69	1.3284e-67	0.115314	366.017
IARS	2.02257	1.76608e-85	2.48503e-83	0.103682	277.957
CEBPG	2.0217	2.31841e-51	1.15036e-49	0.134913	115.525
HSPD1	2.02095	1.74237e-102	4.21183e-100	0.0943109	464.586
MEIS1	2.01916	1.412e-10	9.26029e-10	0.326082	22.0035
ERN1	2.01834	1.22161e-32	3.17702e-31	0.171459	98.794
NLRP2	2.01827	0.00131945	0.003415	0.751274	4.95596
STPG2	2.01709	0.00329129	0.00784344	0.857265	4.79904
NUP50	2.01573	8.55013e-85	1.16821e-82	0.10368	272.878
LOC103220064	2.01446	9.70731e-17	1.04054e-15	0.247871	33.2515
MICAL3	2.01421	3.86808e-164	4.55829e-161	0.0739512	1060.96
CSMD2	2.01313	3.0553e-10	1.94292e-09	0.332735	22.7546
GABPB1	2.01264	6.36235e-23	9.98852e-22	0.207078	84.4884
HSPA4	2.01171	4.92214e-119	2.06238e-116	0.0869561	577.886
TCP10L	2.01114	0.00237485	0.00584337	0.807078	4.97971
MKL1	2.01087	9.23498e-89	1.46324e-86	0.100899	283.285
ZNF670	2.0086	0.000542391	0.00151172	0.671459	5.23245
ALX1	2.00795	1.16815e-05	4.26271e-05	0.496866	12.4076
ZNF274	2.0077	7.46942e-12	5.52732e-11	0.302282	31.0579
RSPH6A	2.0076	0.00118864	0.00310769	0.723856	7.58376
KLHL26	2.00725	1.03409e-28	2.25669e-27	0.182403	94.8524
PRX	2.00065	7.61259e-05	0.00024637	0.558666	10.4215
C18H18orf8	1.9983	1.59269e-24	2.75001e-23	0.198175	71.3501
ZBTB21	1.99782	3.53543e-42	1.32263e-40	0.1481	115.847
RSPO3	1.99448	1.11859e-48	5.19483e-47	0.13696	176.316
LRRC43	1.99338	1.59185e-05	5.70074e-05	0.504431	9.5937
CRYGN	1.99314	0.00180192	0.00453788	0.752815	8.51664
TERT	1.99293	0.00271282	0.00658982	0.817741	4.74764
ENGASE	1.99176	1.18284e-51	5.91576e-50	0.132549	122.475
ASIC3	1.99102	2.98238e-17	3.32345e-16	0.240578	34.4529
FBXO30	1.9898	4.31616e-25	7.75799e-24	0.194804	75.2178
DNAJA3	1.98852	6.93474e-57	4.09889e-55	0.125677	153.324
ZBTB11	1.98842	2.24552e-41	8.15786e-40	0.148738	150.514
APLN	1.9879	0.000262241	0.000775495	0.614673	8.61301
CDH3	1.98641	6.4672e-05	0.000211479	0.549945	7.6738
GTF2H1	1.98601	3.44789e-48	1.57409e-46	0.137025	153.954
TSPAN2	1.9833	1.20695e-09	7.25904e-09	0.339645	19.8042
LOC103234761	1.98221	4.94064e-06	1.89842e-05	0.469211	10.5872
SYDE2	1.9774	1.00959e-38	3.27638e-37	0.153111	104.24
SLC22A15	1.97693	3.05839e-10	1.94423e-09	0.325588	23.562
TBR1	1.97525	1.66499e-07	7.81706e-07	0.397773	17.7807
C5H16orf72	1.97453	1.17808e-74	1.19423e-72	0.108487	223.033
PBX3	1.97362	1.13712e-17	1.30416e-16	0.235232	48.1215
LOC103241405	1.97234	2.43972e-15	2.35902e-14	0.254867	53.856
NAA16	1.96904	7.10517e-31	1.70878e-29	0.17234	94.5343
KLF16	1.9685	2.24144e-40	7.81189e-39	0.149027	99.0649
OTUD3	1.96829	4.83392e-39	1.59342e-37	0.15229	119.771
SLC36A1	1.96771	5.08327e-22	7.58868e-21	0.207217	44.3031
RANGAP1	1.96502	5.87464e-78	6.75405e-76	0.105582	366.378
SLC16A10	1.96437	7.69784e-06	2.88325e-05	0.474669	14.3112
RRP8	1.96404	9.36601e-22	1.37536e-20	0.208086	52.8392
COG3	1.96398	2.25828e-30	5.32915e-29	0.173326	90.446
LEPR	1.96391	1.70874e-16	1.79589e-15	0.243195	65.4072
LOC103233629	1.96353	1.62219e-05	5.80496e-05	0.495528	9.38952
LRRFIP1	1.96336	4.48085e-68	3.57994e-66	0.113216	232.746
BAIAP2	1.9614	3.67978e-41	1.32662e-39	0.147129	126.195
SLC13A3	1.95987	0.000298955	0.000874464	0.617361	6.13145
PAPD7	1.95872	5.62474e-63	3.95726e-61	0.117589	174.402
AGPAT5	1.9577	1.11409e-47	4.98958e-46	0.135865	137.031
PFKFB2	1.95689	6.11876e-27	1.21697e-25	0.184035	69.6106
IRAK2	1.95604	3.7697e-14	3.35589e-13	0.264846	47.9321
HECTD2	1.95601	1.57863e-24	2.72824e-23	0.193772	70.561
SPRED1	1.95536	2.27704e-44	9.17385e-43	0.141093	117.619
TBC1D10A	1.95533	2.77583e-16	2.86002e-15	0.244013	49.1299
TIGD5	1.95295	8.48745e-20	1.11831e-18	0.218162	46.0229
DDX5	1.95294	5.9776e-133	3.22022e-130	0.0797313	625.289
ZEB2	1.95285	8.40837e-56	4.76095e-54	0.124743	236.072
LZTS1	1.95168	0.000652758	0.00179283	0.655802	8.11211
LOC103241986	1.9513	0.000236075	0.000703745	0.595321	9.04205
PREX1	1.94937	9.48858e-45	3.85576e-43	0.139924	163.104
SETD8	1.94765	3.70423e-34	1.0093e-32	0.161042	95.3759
KLF7	1.94725	2.54086e-56	1.46061e-54	0.123781	162.609
ARNTL	1.9472	6.1091e-20	8.08899e-19	0.216441	66.1981
TESK2	1.94574	1.75762e-06	7.21532e-06	0.436344	12.2039
TRAF1	1.94496	3.62555e-07	1.63111e-06	0.402874	28.9825
STK10	1.94405	9.11617e-43	3.49361e-41	0.142929	146.651
LOC103243150	1.94174	9.13182e-09	4.96913e-08	0.353053	17.3543
FAM200A	1.94073	1.49838e-08	7.94043e-08	0.359284	18.2583
ZC3HAV1	1.9395	5.88062e-102	1.36888e-99	0.0907077	350.001
OPTN	1.93941	1.68827e-50	8.14125e-49	0.130514	159.551
KIF1C	1.93555	2.07576e-76	2.31588e-74	0.105068	307.249
STX10	1.92915	1.23882e-26	2.413e-25	0.182829	74.6785
MTCL1	1.92834	4.69658e-41	1.68034e-39	0.145006	117.29
LIN54	1.92786	3.3706e-27	6.81895e-26	0.180635	85.6085
LOC103223187	1.92746	2.35693e-05	8.24182e-05	0.497265	9.10559
ZNF699	1.92608	1.88069e-05	6.66923e-05	0.48927	9.92444
DESI2	1.9249	1.26195e-28	2.74125e-27	0.175312	73.5336
GTF3C4	1.92385	2.05653e-41	7.50016e-40	0.14385	129.964
BCL10	1.92258	4.69753e-28	9.92959e-27	0.177162	95.1412
ORC1	1.92142	3.44075e-16	3.51628e-15	0.240468	52.1605
CSRNP2	1.92011	2.39585e-21	3.45365e-20	0.205378	49.7508
RYR3	1.91911	0.00127824	0.00331745	0.701398	5.42811
LOC103235352	1.91661	2.71106e-06	1.08207e-05	0.436423	12.6326
CLDN4	1.91642	5.77795e-49	2.69662e-47	0.131206	270.984
ZIC2	1.9145	2.86658e-32	7.35366e-31	0.163533	79.9034
ARHGAP40	1.91272	8.12079e-13	6.51834e-12	0.274514	28.7903
CTPS1	1.91245	4.3527e-38	1.37241e-36	0.149399	126.304
LOC103223784	1.91183	4.08621e-07	1.82486e-06	0.398783	22.941
SLC2A8	1.91163	2.41975e-06	9.7301e-06	0.433715	13.7986
LARP1B	1.91162	3.5175e-24	5.92164e-23	0.19078	76.3889
DGKE	1.91148	2.31815e-09	1.35279e-08	0.333119	17.6616
RNF144B	1.91103	0.00405545	0.00946005	0.822429	5.30034
MXD1	1.91044	1.5583e-35	4.46532e-34	0.154821	121.06
ADRB2	1.9103	0.00270172	0.0065671	0.765746	6.29517
WDR3	1.91011	3.36397e-39	1.11765e-37	0.146838	128.266
HSP90AA1	1.90978	4.55589e-88	6.98385e-86	0.0963821	690.392
LOC103222000	1.90977	2.33915e-23	3.77932e-22	0.194694	85.1953
EGR1	1.90882	2.29027e-111	7.19719e-109	0.0853836	1051.17
SLC9A1	1.90809	9.04167e-23	1.4136e-21	0.1972	52.0729
C16H17orf59	1.90792	4.31992e-18	5.10672e-17	0.22411	47.0658
UBN1	1.90499	9.79031e-92	1.70922e-89	0.0939953	287.199
PARS2	1.90389	6.69432e-18	7.83498e-17	0.225494	51.3716
MAFK	1.90279	7.90277e-82	1.0068e-79	0.0996884	236.448
LOC103244631	1.90252	0.000589659	0.0016314	0.629417	11.6243
PIP5K1B	1.90061	3.30362e-05	0.000113213	0.49909	11.465
NR1D2	1.89925	9.84535e-70	8.47644e-68	0.107808	229.493
KLHL15	1.89748	3.59696e-19	4.58247e-18	0.21577	59.2642
NRGN	1.89607	0.00100347	0.0026581	0.669255	6.21151
ADARB1	1.8957	6.32839e-45	2.58272e-43	0.135745	136.601
RSPRY1	1.89501	1.98942e-38	6.36852e-37	0.147404	101.139
TTC9	1.89427	9.54974e-19	1.18353e-17	0.217965	58.2185
LOC103237511	1.89283	5.53105e-11	3.74463e-10	0.298626	25.2637
SOGA3	1.8898	3.21982e-13	2.67443e-12	0.266231	29.5844
PXDC1	1.88965	6.77384e-37	2.02731e-35	0.150201	105.491
ZNF202	1.88909	4.96056e-16	4.99366e-15	0.237822	44.5869
HOXA1	1.888	3.16875e-07	1.4354e-06	0.390216	15.4805
SYNJ2	1.88635	1.02387e-32	2.67012e-31	0.159686	120.203
ZNF774	1.88543	6.08459e-11	4.0944e-10	0.298148	20.9888
PRR7	1.88513	1.11252e-08	5.98988e-08	0.344077	23.9893
ADM	1.88253	7.70334e-22	1.1374e-20	0.198721	73.423
SLC24A2	1.87865	1.51415e-42	5.76754e-41	0.138377	117.339
LOC103217933	1.87768	0.000174661	0.000532455	0.557293	8.28783
LOC103244341	1.87704	1.14767e-18	1.41433e-17	0.216771	55.1571
NOP2	1.87644	1.06394e-37	3.31034e-36	0.147434	161.508
KLHL12	1.87637	2.33668e-42	8.8648e-41	0.138662	105.006
RNF144A	1.87577	3.3125e-16	3.39073e-15	0.234875	34.9375
LOC103233793	1.87381	8.85239e-05	0.000283767	0.527335	10.3047
KANSL1	1.87166	7.07745e-127	3.51172e-124	0.0782936	731.11
LOC103243762	1.86953	3.57063e-06	1.39851e-05	0.43201	12.5724
LOC103229227	1.86915	2.71513e-06	1.08324e-05	0.425724	12.387
SLC22A23	1.86713	6.98229e-22	1.03337e-20	0.197567	55.3983
ADTRP	1.86612	3.72867e-25	6.72123e-24	0.182295	75.8039
STK17B	1.86455	1.34403e-30	3.19566e-29	0.163849	125.58
PDZD8	1.86262	8.07176e-83	1.07178e-80	0.0969351	331.345
GCC1	1.86225	3.07102e-28	6.55765e-27	0.170398	83.033
LUZP1	1.86196	6.34778e-79	7.434e-77	0.09937	262.98
LOC103216795	1.86154	1.98518e-09	1.1676e-08	0.322821	28.6064
PTX4	1.86146	0.000443547	0.00125609	0.600676	9.11507
ZBTB34	1.86046	1.19001e-16	1.2691e-15	0.229318	47.5932
FOXA1	1.86045	1.51334e-07	7.13527e-07	0.372726	18.7505
TRAF3	1.86044	8.71373e-57	5.1183e-55	0.117782	191.852
LOC103236665	1.85938	3.75091e-25	6.75486e-24	0.181589	97.476
PPTC7	1.85912	9.35454e-28	1.94465e-26	0.172099	86.1182
DNAH10	1.85885	4.22366e-12	3.19187e-11	0.27595	30.7357
NT5DC3	1.85816	8.53059e-28	1.77728e-26	0.172035	75.4993
LRR1	1.85806	8.21662e-06	3.06538e-05	0.450303	12.9412
KIAA0226	1.85649	7.26469e-54	3.89136e-52	0.120843	138.869
ERRFI1	1.85322	1.01792e-42	3.88519e-41	0.136253	150.293
MARVELD2	1.85318	3.79236e-08	1.92269e-07	0.354004	22.4272
KMT2C	1.85302	2.17684e-104	5.62252e-102	0.0857004	1727.65
DDX20	1.85158	4.19112e-24	7.03057e-23	0.185075	84.2837
SMURF1	1.85057	4.51493e-73	4.29944e-71	0.102806	311.807
ZNF598	1.85007	6.85516e-42	2.54437e-40	0.137463	124.302
NFX1	1.8498	9.4361e-43	3.60888e-41	0.135983	146.602
RTBDN	1.84882	1.19977e-08	6.43026e-08	0.338056	24.5604
PIK3R3	1.84837	1.12807e-20	1.56166e-19	0.201869	56.8001
PRICKLE1	1.84792	2.40331e-15	2.32501e-14	0.238803	41.374
RGS9	1.84741	0.000322655	0.000938693	0.578219	8.33992
LOC103231698	1.84605	0.000825967	0.00222163	0.633057	7.42958
LOC103215705	1.84591	0.00242158	0.00594439	0.732487	5.02783
CTU2	1.84351	7.44095e-09	4.08678e-08	0.333073	23.465
GEMIN4	1.84314	1.70887e-18	2.08954e-17	0.214083	54.3717
ZNF34	1.84255	4.41239e-17	4.87093e-16	0.223629	53.9922
LYPD1	1.84253	9.44265e-09	5.13087e-08	0.334642	21.9756
OPA3	1.84179	3.88751e-15	3.7151e-14	0.239889	41.6154
MAP7D2	1.84124	4.09652e-15	3.91286e-14	0.239415	58.5418
KLHL11	1.84067	5.36105e-22	7.99071e-21	0.193751	67.9065
LOC103238332	1.83987	0.000747362	0.00203077	0.625889	8.56494
CDCA4	1.83786	1.0182e-14	9.42469e-14	0.243148	40.4848
TRIM47	1.83713	1.76459e-21	2.55934e-20	0.195891	74.2383
LOC103233135	1.83682	2.56252e-09	1.48895e-08	0.320659	19.8899
GSPT2	1.83679	0.00011466	0.000360499	0.52808	7.37018
TCTE1	1.83618	6.06913e-13	4.92187e-12	0.261932	46.4177
CAMSAP2	1.83512	5.53971e-60	3.58939e-58	0.113153	216.163
ZNF746	1.83491	5.37305e-40	1.83531e-38	0.139645	124.873
CRAMP1L	1.83477	4.74458e-60	3.0848e-58	0.112817	190.072
RRAS2	1.83474	2.39145e-40	8.31933e-39	0.139001	133.744
UBASH3B	1.83455	9.11135e-71	8.18069e-69	0.103571	258.7
FAM86A	1.83402	6.32747e-06	2.40049e-05	0.437807	11.3265
PWWP2B	1.83308	1.00002e-17	1.15394e-16	0.217849	39.9722
ZZEF1	1.83297	1.24258e-90	2.05515e-88	0.0911765	398.107
NFKBIB	1.83172	5.97312e-10	3.68531e-09	0.306326	26.5229
SARS	1.83071	2.3655e-24	4.01453e-23	0.182073	84.5863
IRGQ	1.8305	1.02687e-23	1.68656e-22	0.184657	65.6555
LOC103222702	1.83007	0.000326038	0.000947658	0.571459	9.38049
ATRIP	1.82783	1.03818e-11	7.57832e-11	0.27707	33.5976
CHST2	1.82655	0.0017086	0.00432598	0.691897	5.23913
IL7	1.82613	4.72866e-24	7.88319e-23	0.182822	89.7699
LOC103237723	1.8256	2.07173e-09	1.21576e-08	0.316588	23.0082
RUNX1	1.82535	7.36732e-70	6.40142e-68	0.103534	256.021
PVR	1.82534	6.89257e-20	9.11356e-19	0.203282	62.3728
ZBED9	1.8248	2.76268e-09	1.59835e-08	0.31923	22.3723
SLC39A10	1.82428	2.58281e-38	8.22616e-37	0.141996	152.353
LOC103222879	1.82395	6.87369e-10	4.21886e-09	0.306471	27.5864
HECA	1.8236	2.47647e-20	3.34963e-19	0.200468	58.3001
C11H12orf49	1.82342	2.8005e-22	4.23784e-21	0.190449	64.1618
CDKN2C	1.82163	4.49072e-20	6.00089e-19	0.201569	81.1343
ST3GAL1	1.82062	2.77133e-59	1.75937e-57	0.11269	194.245
LOC103228467	1.81899	0.000434047	0.00123104	0.58388	8.50581
STOML1	1.81797	2.47302e-10	1.58871e-09	0.297656	24.5741
PSAT1	1.81791	1.36617e-07	6.47217e-07	0.363829	18.5024
LOC103242262	1.81568	9.66967e-05	0.000307924	0.515183	7.67755
HMGXB3	1.81506	8.31632e-64	5.93955e-62	0.108185	232.742
AP3B2	1.8146	1.15179e-16	1.22972e-15	0.223076	40.4425
STK40	1.81427	2.7762e-77	3.17244e-75	0.0978452	271.1
MAP1LC3B	1.81282	1.21572e-29	2.79884e-28	0.161931	87.1784
KRAS	1.81203	1.03914e-28	2.26508e-27	0.16478	73.3394
MYEOV	1.81045	0.000996444	0.00264173	0.635718	6.57876
ZNF101	1.80998	5.32653e-05	0.000176134	0.490746	8.36604
LOC103226886	1.80998	0.000339269	0.000983535	0.563507	17.8669
CEMIP	1.80961	1.36073e-14	1.24668e-13	0.239827	52.5145
DUSP1	1.80958	3.51453e-67	2.72702e-65	0.104964	462.014
FASN	1.80879	1.45308e-91	2.51356e-89	0.0894681	630.239
STXBP5L	1.80725	2.5649e-06	1.02743e-05	0.410066	17.0117
DUSP10	1.80512	1.28971e-20	1.7815e-19	0.196763	89.6546
SAMD4A	1.80381	8.27355e-75	8.43232e-73	0.0989465	305.405
MSANTD4	1.80266	4.01437e-28	8.52376e-27	0.165666	92.0871
KIAA1217	1.80222	2.95553e-55	1.66348e-53	0.115723	179.024
LOC103222003	1.79792	8.32019e-29	1.8284e-27	0.163064	107.115
LOC103244187	1.79756	0.00332629	0.00791707	0.740042	5.83245
SOX15	1.79619	2.67876e-05	9.29141e-05	0.464117	14.8624
MICAL2	1.79559	1.2465e-21	1.82051e-20	0.190594	65.6151
LOC103243382	1.79532	2.47977e-10	1.59251e-09	0.293177	27.5137
SMURF2	1.79458	1.61065e-39	5.4522e-38	0.137653	137.053
LOC103229094	1.79441	0.00159785	0.00406963	0.667616	5.91803
DDHD1	1.79347	1.12051e-13	9.6427e-13	0.247395	39.6887
CTSW	1.79283	4.95877e-05	0.000164638	0.482534	10.0598
ATAD2B	1.79205	1.89311e-40	6.62237e-39	0.135538	125.24
CDK14	1.78933	1.58094e-78	1.82875e-76	0.0956642	363.373
AKAP12	1.78765	4.87053e-76	5.21783e-74	0.0972385	287.415
YARS	1.78746	4.46184e-52	2.25544e-50	0.118375	172.615
ASNS	1.78658	2.76897e-20	3.73455e-19	0.196719	54.3023
EPT1	1.78583	1.41446e-26	2.74379e-25	0.169201	73.5385
NXN	1.78482	6.55279e-34	1.77774e-32	0.148367	143.259
BMP2	1.78335	7.56671e-66	5.75284e-64	0.104523	289.706
LOC103244555	1.78171	7.83542e-20	1.03385e-18	0.198518	65.4361
GCNT4	1.77998	0.00429985	0.00996971	0.76071	5.97581
PTPLA	1.77944	0.000804954	0.0021713	0.611806	6.30044
GLI2	1.77912	0.00431171	0.00999597	0.762042	4.92105
TMEM44	1.77906	9.64927e-09	5.2371e-08	0.323478	17.6105
NSUN2	1.77763	5.00671e-37	1.51042e-35	0.14102	130.244
FAM43A	1.77733	2.73584e-10	1.74981e-09	0.290937	23.6243
LRRC15	1.77659	5.35485e-09	2.99335e-08	0.316826	27.6269
BSN	1.77633	5.83111e-39	1.9121e-37	0.137036	107.621
LOC103221214	1.77524	0.0023545	0.00579633	0.697366	5.2736
PTPRN	1.77505	7.39985e-25	1.31338e-23	0.174563	81.7917
C21H7orf60	1.7734	6.44898e-17	6.98824e-16	0.216648	47.208
C18H18orf54	1.77324	2.92402e-09	1.68601e-08	0.310482	27.5088
RASAL2	1.77298	1.13257e-80	1.37772e-78	0.0935312	324.979
KCMF1	1.77295	3.4851e-05	0.000118828	0.464108	12.5586
TMEM190	1.77224	2.20516e-18	2.67041e-17	0.206271	46.801
ZNF264	1.77172	1.19829e-22	1.85803e-21	0.183567	69.4407
RAD54L2	1.77126	4.37599e-45	1.80545e-43	0.126502	164.645
GMEB2	1.77041	1.87883e-39	6.33727e-38	0.135788	125.098
LOC103219836	1.7704	4.34237e-08	2.18451e-07	0.33788	21.6469
SLC30A1	1.7692	4.08706e-54	2.20176e-52	0.114872	212.334
GABPB2	1.76908	2.96547e-07	1.34927e-06	0.363561	16.4572
SCAF4	1.76742	1.41027e-53	7.5115e-52	0.115462	313.308
RAB12	1.76616	5.34888e-19	6.73251e-18	0.201403	50.1228
LOC103223515	1.76594	2.86483e-05	9.89856e-05	0.456531	14.3703
LOC103221970	1.7653	7.67951e-27	1.5162e-25	0.166471	111.335
RNF138	1.76522	4.76402e-16	4.81026e-15	0.22221	48.0595
LOC103231005	1.76491	5.57292e-09	3.10972e-08	0.315144	27.8245
LOC103242178	1.76446	3.76184e-09	2.14289e-08	0.310786	21.9514
ZNF616	1.76443	0.00209433	0.00520613	0.680297	4.83985
MITF	1.7637	2.16333e-35	6.18024e-34	0.143191	154.794
LMCD1	1.76369	5.67472e-17	6.18479e-16	0.214669	57.4794
PER1	1.76311	4.96235e-32	1.25929e-30	0.151017	566.928
LOC103228946	1.76271	0.0016832	0.00426856	0.651782	9.05437
TAF5	1.76249	9.56431e-07	4.07169e-06	0.380355	17.3908
LOC103222007	1.76226	9.04294e-14	7.83929e-13	0.241741	58.7512
USP25	1.76207	5.95153e-43	2.30423e-41	0.129042	159.384
ZRANB1	1.76161	1.26856e-59	8.13559e-58	0.108798	228.808
ATF7IP2	1.76107	1.73426e-25	3.18038e-24	0.17077	78.8753
MID1	1.75929	2.73645e-19	3.50992e-18	0.198945	81.0094
USP42	1.75864	2.21429e-52	1.12232e-50	0.11608	205.278
LOC103215470	1.75788	2.25687e-11	1.59078e-10	0.270414	38.3888
USP38	1.75769	9.23352e-32	2.30593e-30	0.151389	99.5325
SNN	1.75723	1.21835e-11	8.84557e-11	0.267202	30.1229
PAPPA	1.75654	1.05496e-07	5.07948e-07	0.345991	24.2028
OSTM1	1.75617	9.0272e-25	1.58333e-23	0.172811	80.2374
PHLPP1	1.75605	5.72635e-56	3.25212e-54	0.111917	230.127
SLC25A32	1.75518	1.22838e-11	8.91495e-11	0.266456	31.3725
PTCHD2	1.75398	0.0023394	0.00576368	0.683434	6.06533
DEPDC1	1.75377	4.12532e-16	4.19541e-15	0.219763	49.0549
FAM208B	1.75295	1.2833e-50	6.20427e-49	0.118046	225.543
SLC6A17	1.75254	2.46188e-17	2.75156e-16	0.210665	50.2861
CAMTA1	1.75111	1.10716e-43	4.39482e-42	0.127159	187.563
KLF6	1.75103	4.84463e-85	6.71659e-83	0.0898131	471.768
TMEM136	1.74959	5.67661e-11	3.84042e-10	0.275038	25.6438
WHAMM	1.74923	1.82975e-22	2.80031e-21	0.181746	62.411
KIAA0513	1.74886	1.2628e-14	1.16034e-13	0.232036	33.8013
ZSWIM3	1.74859	5.93262e-07	2.59836e-06	0.370128	13.0918
QKI	1.74805	6.217e-28	1.30828e-26	0.161177	94.8032
WFIKKN1	1.74755	0.00272822	0.00662383	0.698741	4.87069
LOC103227244	1.74744	2.1638e-08	1.12485e-07	0.325133	29.7187
IL17REL	1.74632	0.000174547	0.000532193	0.515313	12.0554
TMCC3	1.74624	5.36318e-19	6.74601e-18	0.199237	51.9777
SNX30	1.74607	6.11975e-64	4.38737e-62	0.103916	216.332
MYL5	1.74562	2.4244e-05	8.45894e-05	0.448036	10.8523
OSBPL11	1.74399	8.83712e-25	1.55433e-23	0.171858	95.0903
SH2B3	1.74239	1.5381e-37	4.71559e-36	0.137068	126.205
AAK1	1.74191	2.21598e-51	1.10244e-49	0.116134	178.522
CYLD	1.74132	2.38473e-46	1.0196e-44	0.122548	244.264
ADCY3	1.73927	2.99795e-15	2.8899e-14	0.224894	42.7826
LMX1B	1.73743	7.86561e-06	2.94433e-05	0.41667	13.7334
ARID5A	1.73715	2.57286e-09	1.49311e-08	0.302228	21.6997
DCBLD1	1.73702	2.35402e-16	2.4374e-15	0.215726	44.7704
RAP2B	1.7365	2.56766e-25	4.66409e-24	0.168861	81.6206
PTGER1	1.73549	0.000388771	0.00111487	0.546148	11.2212
PLCB1	1.73499	1.43453e-06	5.96562e-06	0.380584	18.0618
USP36	1.73427	3.20533e-105	8.88772e-103	0.0801801	711.835
ZNF462	1.73271	1.56661e-93	2.81318e-91	0.0846853	399.509
NEXN	1.7308	6.25558e-12	4.66017e-11	0.259057	36.6471
STK38L	1.72998	1.45845e-26	2.82621e-25	0.163936	88.5768
TMEM194A	1.72918	6.49806e-24	1.07475e-22	0.173709	73.6698
LOC103246243	1.72908	1.78127e-14	1.61161e-13	0.230379	42.665
NXT1	1.7267	4.28294e-06	1.65855e-05	0.399795	20.8615
NR3C1	1.72593	1.60671e-59	1.02693e-57	0.106553	268.927
SMG1	1.72444	6.06541e-126	2.93239e-123	0.0724005	1067.99
VEGFA	1.72441	1.3377e-70	1.19537e-68	0.0974623	361.082
C1H11orf82	1.72426	0.000237453	0.000707518	0.520836	8.55731
KIF1A	1.72384	7.41083e-32	1.86557e-30	0.14818	111.338
BAIAP2L1	1.72297	4.72667e-23	7.5018e-22	0.176572	92.2247
FOXO3	1.72221	7.76936e-102	1.78648e-99	0.0805852	459.131
RIPK1	1.72051	1.06747e-47	4.79217e-46	0.119296	236.036
GPRIN1	1.71881	7.42205e-19	9.27388e-18	0.197106	58.6772
NCKAP5L	1.71693	7.39434e-63	5.16371e-61	0.10307	205.015
SMAD7	1.71577	2.09417e-58	1.31619e-56	0.106996	193.684
LOC103220041	1.71559	1.65737e-07	7.78326e-07	0.343292	22.3872
ARHGAP23	1.71511	2.27212e-87	3.42727e-85	0.0868684	330.704
RNF19B	1.71462	3.77658e-22	5.66037e-21	0.179545	77.2814
LOC103221936	1.71381	1.18092e-06	4.97621e-06	0.372814	21.0368
CHGA	1.71124	1.10088e-05	4.03993e-05	0.416769	13.6941
OSBPL3	1.71073	1.3482e-43	5.34041e-42	0.124296	214.986
LOC103230277	1.71	0.00195812	0.00489529	0.650698	5.60327
SAP30	1.71	3.17359e-10	2.01204e-09	0.280652	36.087
ZNF81	1.70945	4.84544e-12	3.64278e-11	0.25378	39.33
USP12	1.70733	7.90031e-29	1.73816e-27	0.154709	96.1195
SHROOM3	1.707	6.67251e-12	4.95706e-11	0.255155	55.7847
NR4A2	1.70682	0.000120108	0.000376622	0.484037	15.5461
HMGCS1	1.70654	3.47893e-25	6.28307e-24	0.166444	90.678
LOC103225095	1.70626	1.32233e-07	6.27866e-07	0.339372	29.159
ZNF131	1.70571	2.40202e-27	4.90153e-26	0.158999	111.087
LOC103248781	1.70546	0.000111157	0.000350422	0.483998	9.91855
RHOBTB3	1.70487	2.77537e-35	7.90477e-34	0.138697	104.394
LRRC42	1.70457	3.38997e-30	7.92044e-29	0.150626	135.987
NOL6	1.70456	1.98622e-18	2.41614e-17	0.197559	69.6016
INHBA	1.70445	2.0303e-48	9.38267e-47	0.11712	242.513
MAP3K9	1.70128	2.254e-76	2.49996e-74	0.0923227	266.119
DCLRE1B	1.70078	2.29112e-07	1.05777e-06	0.345458	21.5241
SLC18A2	1.70024	1.54162e-10	1.00788e-09	0.273494	29.0684
CARS	1.70015	6.67555e-41	2.37486e-39	0.127932	161.292
LOC103215245	1.70006	7.31708e-07	3.16648e-06	0.361912	16.4388
NFYB	1.69995	1.04445e-17	1.20374e-16	0.201634	59.271
DCUN1D3	1.69952	1.35085e-34	3.75114e-33	0.139687	114.96
RHOB	1.6987	6.49461e-73	6.09233e-71	0.0944758	406.593
LOC103246661	1.69826	3.47996e-38	1.10092e-36	0.132532	213.939
PTP4A1	1.69822	2.18785e-68	1.7781e-66	0.0975904	350.923
NUFIP1	1.69769	2.3976e-05	8.36854e-05	0.431979	16.8902
ELK1	1.69692	5.14021e-26	9.67252e-25	0.162591	116.807
MPP2	1.69554	0.000430843	0.00122398	0.540865	9.49066
MSANTD3	1.69345	2.38419e-12	1.84464e-11	0.247764	39.0475
PPID	1.69288	1.8789e-15	1.828e-14	0.216919	43.6729
MOCOS	1.68995	2.75392e-12	2.1168e-11	0.247975	36.1449
CD3EAP	1.6895	2.16716e-22	3.30158e-21	0.175872	86.2531
DENND2C	1.6888	1.39679e-08	7.42289e-08	0.309459	31.4346
LOC103220832	1.68849	0.00110648	0.00291217	0.589924	9.00507
FAM133B	1.6883	9.76077e-25	1.70565e-23	0.166245	97.1175
MAP3K7	1.68715	7.98573e-25	1.41105e-23	0.165988	78.116
ARID2	1.68695	1.24512e-69	1.06712e-67	0.0960076	305.246
LOC103246769	1.68612	2.00962e-14	1.81647e-13	0.225279	46.5276
ZACN	1.68557	0.000769473	0.0020848	0.570401	9.65883
CHSY1	1.68389	3.57235e-26	6.76273e-25	0.160845	88.4634
CREB1	1.68316	4.28751e-53	2.21482e-51	0.110304	208.923
LOC103244556	1.68232	2.47163e-32	6.35778e-31	0.14342	137.631
AARS	1.68115	6.02154e-75	6.20416e-73	0.0921143	308.936
SCYL2	1.68085	1.2816e-40	4.5083e-39	0.126922	244.013
MEX3D	1.67961	6.86044e-24	1.13269e-22	0.168429	102.888
DOT1L	1.67878	3.77445e-70	3.29478e-68	0.0951828	317.997
BAZ1A	1.67739	1.06913e-57	6.48182e-56	0.105235	321.898
CAMKK1	1.67524	1.10079e-16	1.17594e-15	0.205557	61.5295
LOC103229108	1.67411	0.00376722	0.00885672	0.697865	4.66038
LOC103243232	1.67408	0.000337317	0.000978329	0.520152	8.07479
KRT28	1.6723	3.12048e-07	1.41502e-06	0.34365	19.6885
GOLGA8M	1.67085	2.50443e-07	1.15005e-06	0.33984	20.6678
IER2	1.6695	1.46882e-71	1.35095e-69	0.0937275	314.621
ZNF35	1.66908	1.38304e-08	7.35607e-08	0.305516	23.9901
ZNF823	1.66878	2.76171e-10	1.76575e-09	0.272978	34.8213
DDX21	1.66814	3.30607e-67	2.58655e-65	0.0966722	375.598
BTBD11	1.66711	2.28902e-20	3.11171e-19	0.182853	83.4521
HARBI1	1.66636	0.000120514	0.000377834	0.474422	9.55378
FHL2	1.66537	1.92359e-28	4.1498e-27	0.151938	153.919
PIM1	1.66459	7.11807e-26	1.33146e-24	0.160095	124.079
SPSB1	1.66442	2.65461e-12	2.04547e-11	0.243971	41.1767
USP31	1.66354	1.61251e-29	3.69428e-28	0.148783	92.419
HK1	1.66302	1.64606e-09	9.76908e-09	0.285083	34.2486
TNFSF9	1.66284	2.76535e-06	1.10164e-05	0.375811	16.1895
PPP4R4	1.6619	3.48641e-07	1.57151e-06	0.342024	17.7332
UVRAG	1.66174	1.98854e-32	5.12912e-31	0.141342	149.526
NUPL2	1.66158	1.03485e-08	5.58928e-08	0.301051	29.3766
WDR25	1.66059	2.4767e-09	1.44175e-08	0.288385	22.9763
MTMR9	1.66032	1.21783e-14	1.1201e-13	0.219611	41.379
LOC103248691	1.65995	0.00255946	0.00625273	0.650003	7.34065
MIIP	1.65975	7.77819e-08	3.79977e-07	0.322503	30.5708
MRPS6	1.65905	1.85757e-12	1.44969e-11	0.241952	37.6817
SQSTM1	1.65739	1.17128e-73	1.15626e-71	0.0916537	1087.88
VGF	1.6568	3.01619e-76	3.2873e-74	0.0898954	1429.39
FAM102A	1.6564	4.19606e-48	1.91103e-46	0.11431	181.778
GPAM	1.65594	1.35048e-36	3.97243e-35	0.132112	150.792
LOC103222020	1.65516	1.72621e-53	9.14263e-52	0.108063	387.464
LOC103221769	1.65265	4.83936e-05	0.000160985	0.439648	12.2796
LOC103221993	1.65196	9.39127e-13	7.50307e-12	0.236854	49.4757
CCNYL1	1.65066	4.09621e-09	2.32353e-08	0.290674	28.65
KCNG1	1.65066	1.09555e-08	5.90524e-08	0.300504	28.9243
ZNF217	1.65018	3.7331e-81	4.63076e-79	0.0867765	452.748
TRIM11	1.64943	3.41975e-23	5.46435e-22	0.168305	82.927
RAB15	1.64882	1.76659e-07	8.2632e-07	0.33031	19.6542
PARD6A	1.648	5.48016e-05	0.000180865	0.442916	13.9927
PID1	1.64762	0.000352208	0.00101776	0.513971	9.56767
MID1IP1	1.64729	1.6104e-18	1.97169e-17	0.190641	66.6078
SOAT2	1.64694	0.00405713	0.00946253	0.685703	6.77938
TOPORS	1.64294	2.81414e-35	8.00311e-34	0.133594	141.009
KPNA4	1.64271	4.76549e-63	3.36529e-61	0.0984026	280.858
EFCAB5	1.6417	0.00263268	0.00641249	0.639262	6.95015
KLF11	1.64107	1.15363e-37	3.57758e-36	0.128851	178.495
PTCH1	1.64104	6.18049e-31	1.4921e-29	0.143107	144.126
B3GALT6	1.64084	2.09634e-09	1.22906e-08	0.283473	26.8423
AFF4	1.64038	1.29056e-86	1.88632e-84	0.0834807	712.317
RAB26	1.64014	2.00252e-06	8.14616e-06	0.364244	20.6338
DAAM1	1.63989	1.45155e-37	4.46476e-36	0.12888	167.573
ATG101	1.6394	5.17685e-20	6.86908e-19	0.181595	77.0697
RLF	1.63892	3.58374e-64	2.58895e-62	0.0975429	349.813
CHGB	1.63879	2.31108e-05	8.09199e-05	0.415416	12.7662
MAPK8IP2	1.63773	0.000301957	0.000882015	0.502926	8.42521
TNN	1.63744	2.81342e-18	3.37235e-17	0.191066	59.9082
ALKBH1	1.63699	1.73679e-07	8.12988e-07	0.327281	23.4685
GTPBP4	1.63663	5.31131e-35	1.49693e-33	0.133534	198.59
TANC2	1.63629	2.38218e-81	2.9944e-79	0.0859846	386.807
ANKRD9	1.6361	6.90847e-08	3.39659e-07	0.316926	24.323
ARL5B	1.63535	1.09563e-14	1.01117e-13	0.215838	79.7247
C25H1orf198	1.63509	5.87454e-14	5.16144e-13	0.222158	40.0889
KMT2A	1.63499	1.46985e-115	5.22906e-113	0.0717101	886.108
ZNF267	1.63485	5.14865e-17	5.6375e-16	0.198393	62.2153
IRF2BPL	1.63316	1.26644e-37	3.90813e-36	0.128275	140.656
LOC103222369	1.63215	1.40413e-13	1.19634e-12	0.225558	50.3186
ARHGEF10	1.63174	4.55596e-23	7.23696e-22	0.166909	93.7138
CYTH1	1.63167	2.01713e-24	3.45754e-23	0.161817	97.8288
KIAA0247	1.63117	8.82698e-20	1.15981e-18	0.181821	61.2128
XKR5	1.63068	0.000989929	0.00262667	0.563836	7.58652
FAM118B	1.63003	5.63677e-07	2.47569e-06	0.341875	20.8659
ZNF425	1.63002	2.50016e-08	1.29152e-07	0.304393	23.6356
ZC3H4	1.62994	1.6966e-91	2.8562e-89	0.0805979	521.078
SBNO1	1.62868	4.96536e-64	3.57335e-62	0.0968125	330.912
ZNF547	1.62856	0.000636328	0.00175102	0.534998	9.27995
TANC1	1.62837	6.70916e-40	2.28755e-38	0.123952	201.062
PPP1R10	1.62732	8.69946e-76	9.26714e-74	0.0886134	466.406
TBX2	1.6272	6.17515e-06	2.34507e-05	0.382687	14.0161
LOC103238591	1.62674	5.2194e-08	2.60349e-07	0.311586	18.9962
RPIA	1.6253	7.08741e-06	2.66786e-05	0.384905	14.5831
LOC103224586	1.62403	0.00374155	0.00880077	0.661548	9.37358
GPR115	1.62369	3.92693e-13	3.23894e-12	0.228571	40.293
RFK	1.62335	4.886e-07	2.16105e-06	0.338509	18.8412
MAST2	1.62078	3.10776e-55	1.74395e-53	0.10417	287.032
AMDHD2	1.61973	5.50139e-17	5.99934e-16	0.196625	61.3409
RIOK3	1.61903	2.44211e-40	8.46434e-39	0.122585	201.169
KDM6A	1.61893	1.94146e-43	7.6582e-42	0.117801	242.186
MMAA	1.6182	0.00010088	0.000320109	0.453163	10.0385
RELL1	1.61817	4.95963e-16	4.99366e-15	0.203155	54.4645
COL5A2	1.61738	3.41537e-08	1.74045e-07	0.304883	24.5671
HSPB9	1.61722	0.00364608	0.00860087	0.661918	5.71671
ZNF574	1.61518	3.01652e-28	6.46323e-27	0.147985	121.077
XPO6	1.61504	2.68467e-76	2.94299e-74	0.087593	423.394
NR4A1	1.61494	1.80099e-13	1.52208e-12	0.223789	109.768
WSB2	1.61473	3.35108e-41	1.21043e-39	0.120877	193.935
RHBDL3	1.61429	2.2057e-08	1.14474e-07	0.300114	21.1668
RUNDC3B	1.6141	4.09835e-05	0.000138039	0.424711	11.8081
NUP98	1.6138	1.99183e-85	2.78192e-83	0.0826321	586.129
MDN1	1.61301	2.73951e-74	2.74753e-72	0.0887955	423.484
ETF1	1.61211	3.84001e-46	1.63071e-44	0.113689	224.566
TRIM35	1.61134	9.35743e-19	1.16075e-17	0.185058	58.8034
LOC103225754	1.61125	1.00348e-08	5.43228e-08	0.292068	35.7376
ZNF263	1.61086	9.71381e-28	2.01489e-26	0.148943	102.524
ZNF695	1.60987	0.000293703	0.000860169	0.491009	11.0201
TULP4	1.60967	3.22833e-40	1.11077e-38	0.121885	173.855
ETV5	1.6096	1.70275e-41	6.23406e-40	0.12002	141.908
FRMD6	1.6095	1.26081e-24	2.19102e-23	0.158779	122.938
UCK2	1.60882	3.90764e-47	1.70158e-45	0.112187	214.671
ZNF558	1.60857	5.37808e-07	2.36814e-06	0.336856	24.132
OXCT1	1.60837	8.49711e-11	5.66725e-10	0.254798	38.4544
GJA1	1.60486	1.03042e-11	7.52465e-11	0.242103	46.037
ATP13A3	1.60441	1.73593e-94	3.17777e-92	0.0780236	649.517
CLSTN2	1.60423	1.99575e-43	7.85592e-42	0.116783	156.272
JUND	1.60372	6.92841e-73	6.46709e-71	0.0891862	413.874
ZBTB7A	1.60368	1.78362e-68	1.45585e-66	0.0920921	262.226
CATSPERG	1.6036	0.00198063	0.00494633	0.597935	11.3078
SESN1	1.60348	4.17325e-10	2.61417e-09	0.264324	31.422
TTC13	1.60315	2.15503e-10	1.39393e-09	0.260014	30.7035
TRNAR-CCG	1.60298	8.87993e-05	0.000284553	0.442807	15.2162
LOC103225945	1.60289	5.89504e-11	3.97394e-10	0.251302	45.6997
KHDRBS3	1.60224	2.00817e-10	1.30117e-09	0.259284	45.6935
BTAF1	1.60152	7.01072e-52	3.52499e-50	0.106201	209.249
CHD1	1.60127	4.50182e-76	4.85039e-74	0.0870266	548.072
LOC103221943	1.60122	4.11918e-09	2.33586e-08	0.281493	38.0173
ZNF516	1.59867	8.84466e-38	2.76103e-36	0.125273	141.862
POLG2	1.59845	6.63645e-27	1.31439e-25	0.150265	139.878
CEP76	1.59827	6.40024e-07	2.79279e-06	0.337088	30.1381
MTSS1L	1.59797	7.17633e-23	1.12384e-21	0.164327	74.4859
MCU	1.59751	3.02681e-22	4.55834e-21	0.166614	98.842
LOC103222706	1.59705	2.71465e-15	2.61948e-14	0.205786	61.4913
MAP3K10	1.59648	6.15261e-17	6.68246e-16	0.194322	73.8683
BAHD1	1.59634	1.46236e-27	3.01855e-26	0.148233	93.9553
ZMYM5	1.596	8.64055e-14	7.50772e-13	0.218226	45.6373
C19H22orf46	1.59533	0.000916298	0.00244264	0.546923	8.20141
KCTD2	1.59531	1.91202e-36	5.58066e-35	0.127452	131.614
ZNF672	1.59513	1.68557e-17	1.90422e-16	0.190347	55.8047
DHCR24	1.59432	3.0556e-18	3.6418e-17	0.18574	75.0028
PIKFYVE	1.59403	3.39329e-49	1.59951e-47	0.1087	191.23
EGFR	1.59253	1.60407e-44	6.4764e-43	0.114385	218.681
LOC103246064	1.59235	0.000440521	0.00124846	0.506054	10.2831
SEC31B	1.59042	0.000653914	0.00179522	0.521907	8.87416
KSR1	1.58851	4.62123e-21	6.55137e-20	0.170927	76.6572
CABP1	1.58838	0.00230253	0.00568249	0.604146	7.55834
LOC103239136	1.58571	4.36123e-09	2.46348e-08	0.279561	24.6077
MMD	1.58513	1.35149e-15	1.3279e-14	0.201893	58.6268
FAM131A	1.58482	2.28492e-15	2.21161e-14	0.20359	54.227
ARHGAP9	1.58446	6.97841e-06	2.62946e-05	0.374789	16.9114
CLCN6	1.58439	6.16271e-26	1.15505e-24	0.151922	145.146
PDE12	1.58336	6.33625e-17	6.87399e-16	0.192646	56.4586
RBBP8	1.58321	3.62049e-27	7.30881e-26	0.147909	113.654
AHR	1.58306	9.06481e-27	1.7841e-25	0.149348	152.029
DEDD2	1.58261	8.43797e-17	9.09132e-16	0.193088	68.3918
MED27	1.58146	1.85259e-08	9.71372e-08	0.291277	35.1177
HERPUD1	1.57877	1.88108e-25	3.44013e-24	0.152979	93.0504
FAM83E	1.57674	0.00137638	0.0035487	0.561618	11.2324
CDC6	1.57648	4.12644e-21	5.87643e-20	0.169223	93.3914
SLC25A22	1.57513	1.36646e-15	1.34121e-14	0.200759	52.5224
ELOVL7	1.57412	5.64739e-06	2.15549e-05	0.367281	14.8389
ANKRD28	1.57345	1.8172e-50	8.69628e-49	0.105865	256.952
TEAD1	1.57308	9.31069e-77	1.05122e-74	0.085107	358.106
LOC103222013	1.57265	6.47721e-51	3.14762e-49	0.105335	329.538
TMEM181	1.57203	7.9887e-12	5.87927e-11	0.235601	40.3529
LHX1	1.57124	4.13528e-46	1.75215e-44	0.110869	180.374
PITX2	1.57025	0.00010941	0.000345259	0.440814	18.5638
DUSP6	1.56975	3.28849e-15	3.16511e-14	0.202726	61.446
GNAQ	1.56967	3.51216e-32	8.97313e-31	0.133976	121.76
SRL	1.56935	1.64047e-07	7.71077e-07	0.312752	19.6011
ARID1A	1.56909	2.07985e-81	2.63192e-79	0.0824152	638.67
RPUSD2	1.56906	3.08753e-07	1.40076e-06	0.320423	22.7939
BRD2	1.56868	3.29108e-65	2.47225e-63	0.0923715	929.524
PRRT2	1.56844	0.00140169	0.00360657	0.559636	8.38469
ELMSAN1	1.56731	3.78938e-60	2.48086e-58	0.0962481	310.518
LOC103218789	1.56702	0.00284006	0.00686353	0.6142	7.61863
TRNAF-GAA	1.56607	0.000513586	0.00143803	0.50073	10.2906
LOC103219622	1.56492	0.000170453	0.000520638	0.453856	11.9212
ZNF536	1.56372	1.67631e-28	3.62879e-27	0.142881	128.87
LIFR	1.56368	1.31824e-22	2.03733e-21	0.161607	87.9081
FOXK2	1.56299	1.71734e-62	1.19485e-60	0.0940507	267.364
ZNF697	1.56223	2.36857e-41	8.58835e-40	0.116718	152.052
RNF139	1.56166	1.1179e-14	1.03071e-13	0.206074	49.205
RAP2A	1.55987	4.55188e-17	5.01319e-16	0.188757	63.4545
RADIL	1.55964	9.69236e-07	4.12527e-06	0.33455	21.1972
DDX31	1.55854	2.36258e-12	1.82867e-11	0.227609	58.6795
FLCN	1.55791	2.53035e-42	9.56108e-41	0.114975	177.613
MARCH9	1.55788	6.04704e-19	7.591e-18	0.177695	67.5385
HOXB8	1.5577	0.000534931	0.00149313	0.500811	9.88248
EZH2	1.5564	6.15662e-29	1.36729e-27	0.140611	126.223
ANKRD13B	1.55609	2.38844e-17	2.67423e-16	0.186504	57.6466
MDM4	1.5553	2.63748e-26	5.03846e-25	0.147982	100.066
LOC103217007	1.55491	0.00256864	0.00627354	0.598217	6.3247
EDN2	1.55427	1.03381e-05	3.80818e-05	0.374924	17.3523
CENPJ	1.55365	2.54908e-10	1.63591e-09	0.25269	34.5736
UBE2J2	1.55227	1.09875e-22	1.71214e-21	0.160051	102.807
ELL	1.55168	6.08415e-37	1.8267e-35	0.123061	164.969
SYBU	1.5515	1.98532e-09	1.1676e-08	0.2667	39.9785
POC1A	1.55141	6.29218e-10	3.87583e-09	0.258361	39.3647
DAPK3	1.55134	2.79775e-25	5.07715e-24	0.150824	126.926
ODC1	1.55124	3.64668e-47	1.59532e-45	0.108008	277.374
AKIRIN1	1.55073	7.36658e-25	1.30911e-23	0.152349	94.8075
TAF1L	1.5507	9.41014e-05	0.000300229	0.429485	15.7352
MEF2D	1.55053	9.19184e-44	3.6641e-42	0.112386	240.994
PLK4	1.54927	5.19685e-14	4.58739e-13	0.209723	53.2087
GDF15	1.54834	1.16235e-47	5.18112e-46	0.107312	303.62
FAM214B	1.54788	1.2391e-17	1.41253e-16	0.1839	70.3262
PAXIP1	1.54734	1.59792e-33	4.29797e-32	0.129188	154.066
UBR5	1.54683	1.09171e-94	2.03804e-92	0.0751064	883.927
SH3BP4	1.54671	2.00503e-40	7.0009e-39	0.117205	231.444
ZKSCAN5	1.54633	2.49011e-26	4.7666e-25	0.146949	89.3628
GPT2	1.54556	3.31681e-16	3.3933e-15	0.192425	50.2056
EIF4G3	1.54554	1.80507e-70	1.59787e-68	0.0873828	355.948
NUDT4	1.54512	7.70985e-39	2.51504e-37	0.11926	161.26
SGOL2	1.54499	1.85779e-11	1.31934e-10	0.23578	40.3382
EFNA2	1.54478	3.83815e-07	1.721e-06	0.318973	21.9869
TRNAI-AAU	1.5436	5.82509e-05	0.000191512	0.41144	21.2162
HERC1	1.5424	6.04259e-79	7.12082e-77	0.08225	508.532
UBIAD1	1.54185	2.03182e-07	9.43129e-07	0.309637	20.2761
PPIF	1.54127	3.12305e-17	3.47815e-16	0.185357	75.0774
SETD5	1.54095	5.61602e-74	5.57316e-72	0.0849742	529.183
APTX	1.53976	1.35555e-10	8.89933e-10	0.246774	34.6402
LOC103222120	1.53944	0.00101757	0.00269192	0.528511	9.1045
FAM83D	1.53847	1.01256e-07	4.88032e-07	0.301338	25.9043
DIDO1	1.53693	8.59083e-79	9.99877e-77	0.0820355	739.785
LOC103231197	1.53673	0.00389539	0.00912845	0.625298	6.73175
AXIN2	1.53533	1.99307e-05	7.04391e-05	0.383153	23.9135
PIP5K1A	1.53499	2.20732e-47	9.72407e-46	0.106719	290.739
MED13L	1.53426	9.58992e-85	1.30085e-82	0.078888	488.704
TRNAK-UUU	1.53333	3.39868e-05	0.000116259	0.395303	19.1311
RASSF3	1.53322	3.40072e-31	8.31655e-30	0.133044	125.904
SNTB1	1.53299	4.35156e-08	2.18797e-07	0.290748	20.7749
FAM118A	1.53176	1.009e-08	5.45744e-08	0.27684	26.8143
HK2	1.53171	8.70079e-69	7.16391e-67	0.0877023	352.049
UBA6	1.52972	4.74141e-23	7.51886e-22	0.15642	97.3032
MAMLD1	1.52967	1.21314e-25	2.24473e-24	0.147615	152.763
LOC103228291	1.52941	0.00155244	0.00396148	0.550471	9.78654
DNAJC3	1.52896	1.72557e-27	3.54805e-26	0.142111	115.83
GTF2A1	1.52888	6.67622e-25	1.18867e-23	0.149802	112.501
SUPV3L1	1.52879	4.38164e-28	9.27226e-27	0.140292	177.331
KIF1B	1.52848	1.30007e-82	1.70228e-80	0.0796067	499.239
HEG1	1.52844	1.15272e-37	3.57758e-36	0.11998	145.785
THAP2	1.52779	0.000109488	0.000345448	0.428552	10.4985
CNTFR	1.52712	8.76432e-05	0.000281231	0.419983	15.7464
MESDC1	1.52604	3.42423e-13	2.83548e-12	0.214115	41.8295
RAB3GAP2	1.52445	3.36687e-39	1.11765e-37	0.117119	188.901
MLLT4	1.52377	7.92514e-81	9.70315e-79	0.0802567	503.525
ZSWIM4	1.52115	5.44094e-26	1.02282e-24	0.145719	118.649
TESK1	1.52098	1.35082e-13	1.15352e-12	0.209634	45.787
EHD4	1.52049	3.80622e-16	3.87926e-15	0.189773	76.4438
NFKBIA	1.5196	1.9743e-31	4.87244e-30	0.131258	319.344
LOC103223323	1.51819	0.000842086	0.00226143	0.507713	11.0222
LTBP1	1.51811	2.57933e-07	1.18272e-06	0.307082	24.1146
HSP90AB1	1.51608	3.60855e-73	3.47139e-71	0.0840781	1288.07
PPP2R2D	1.51516	6.03043e-22	8.96011e-21	0.159163	101.231
ZNF655	1.51449	1.81262e-53	9.52002e-52	0.0988324	253.141
LOC103234361	1.51332	8.31403e-05	0.00026783	0.415837	15.1983
PLAUR	1.513	1.5154e-11	1.08973e-10	0.22976	66.587
RSC1A1	1.5123	4.6063e-16	4.65943e-15	0.189554	60.8839
RAB30	1.51022	9.73088e-07	4.1398e-06	0.322637	32.1141
LOC103248271	1.51013	7.01241e-17	7.58572e-16	0.18386	64.8308
KIAA0232	1.50953	2.409e-43	9.46286e-42	0.110057	183.395
TSPYL2	1.50934	8.0432e-21	1.12587e-19	0.163171	100.005
FAM13B	1.50864	3.9437e-29	8.89455e-28	0.135751	126.563
FBXW11	1.50792	2.07041e-39	6.95858e-38	0.115522	234.358
FBXO42	1.50694	6.31198e-19	7.91832e-18	0.171859	86.5607
ETS1	1.50501	9.11697e-55	4.98262e-53	0.0969528	371.933
ZNF75D	1.50488	2.71194e-07	1.2402e-06	0.306069	19.8051
PTX3	1.50464	5.68651e-05	0.000187119	0.402415	21.0252
SYVN1	1.50429	4.25431e-29	9.56079e-28	0.135377	108.537
HCFC2	1.50329	8.82916e-13	7.07196e-12	0.214836	46.5334
ZNF503	1.50324	2.20056e-38	7.03248e-37	0.116747	180.309
GABBR2	1.50262	0.00408664	0.00952455	0.612736	6.73333
RAB20	1.50204	2.80155e-11	1.96223e-10	0.231393	43.1651
MAFF	1.50039	5.57068e-30	1.29833e-28	0.13259	137.44
KAT6A	1.50009	6.20352e-72	5.73369e-70	0.0839078	533.034
LOC103238512	1.49932	1.37176e-06	5.73111e-06	0.326349	23.2114
CD276	1.49909	1.06906e-35	3.08212e-34	0.12108	153.358
ZBTB37	1.4983	1.84291e-12	1.43884e-11	0.217515	40.5679
ADAT1	1.49555	7.85508e-09	4.30545e-08	0.267768	27.9369
NLK	1.49521	7.84565e-24	1.29309e-22	0.150157	86.7912
KDM5B	1.49471	1.0352e-50	5.01765e-49	0.100235	324.57
SLC4A11	1.49468	2.7592e-08	1.41679e-07	0.278877	26.0157
LOC103246660	1.4946	0.00174997	0.00441995	0.540704	10.6036
ARRDC3	1.49284	4.70177e-21	6.65555e-20	0.160475	136.688
MYCBP2	1.49192	1.56066e-60	1.0398e-58	0.0912721	317.112
ZNF121	1.49154	4.42107e-11	3.02355e-10	0.231899	49.9679
RELB	1.49134	4.86539e-19	6.15271e-18	0.169534	95.0235
LOC103222006	1.49006	2.98909e-33	7.9716e-32	0.124948	213.422
SPEN	1.48682	4.00538e-88	6.19028e-86	0.074931	1369.82
APOBR	1.48659	1.03318e-24	1.80376e-23	0.146203	95.0266
RASA2	1.48651	1.51088e-15	1.47681e-14	0.189801	66.0139
PIEZO1	1.48637	7.69288e-55	4.24121e-53	0.0957157	303.711
SLC5A2	1.48573	5.67523e-05	0.00018678	0.396241	11.4889
RALA	1.48525	7.86638e-21	1.10194e-19	0.160606	86.7925
PLK3	1.48521	1.20933e-07	5.76972e-07	0.291561	33.8877
LOC103222018	1.48402	1.09518e-21	1.60572e-20	0.156959	129.999
WDR4	1.48352	8.79746e-13	7.05256e-12	0.211635	47.2091
HSPA9	1.48349	5.26413e-71	4.74905e-69	0.0834941	583.684
RIPK2	1.48272	7.41359e-07	3.20383e-06	0.313044	28.7563
NAT10	1.47993	9.3702e-18	1.08323e-16	0.174911	87.33
ABHD17C	1.47969	1.94071e-13	1.63577e-12	0.205126	52.5273
TIAM2	1.47969	6.9146e-05	0.00022525	0.399413	16.5414
XPO5	1.47918	8.5569e-33	2.23463e-31	0.124955	178.558
SOCS6	1.47818	2.58639e-29	5.89678e-28	0.132583	124.693
AGFG1	1.47804	1.58764e-33	4.27642e-32	0.123377	167.76
GAREML	1.47739	9.56877e-18	1.10551e-16	0.174684	61.68
LOC103246879	1.47712	2.7295e-08	1.40231e-07	0.275417	28.2073
BMI1	1.47697	4.19149e-21	5.96007e-20	0.158444	116.335
SUZ12	1.47661	9.82899e-46	4.12752e-44	0.104548	256.578
DLC1	1.47658	2.26699e-27	4.64105e-26	0.137237	130.639
FGFR1OP2	1.47655	1.27244e-21	1.85695e-20	0.156626	94.9753
LOC103235001	1.47575	1.96731e-08	1.0261e-07	0.272009	27.6561
NXF1	1.47546	3.69908e-28	7.88092e-27	0.135173	159.523
EIF2B5	1.47532	3.34003e-32	8.54494e-31	0.125738	172.901
YWHAG	1.47531	2.72667e-79	3.23342e-77	0.0784919	555.92
CLCN1	1.4753	0.00148854	0.00381078	0.522762	8.6914
ZBTB48	1.47312	4.77911e-16	4.8213e-15	0.184211	85.8292
SMCHD1	1.47106	5.62457e-48	2.5432e-46	0.101546	293.127
SLC3A2	1.47041	2.4803e-36	7.22813e-35	0.117601	260.849
RIMS2	1.46902	3.98102e-33	1.05424e-31	0.123419	163.384
ENAH	1.46894	3.2039e-61	2.16522e-59	0.0894062	416.134
FBXO34	1.46848	4.09402e-20	5.47855e-19	0.161852	96.8942
SETBP1	1.46809	1.32409e-18	1.62855e-17	0.169119	83.4238
LRRC25	1.46712	0.00149906	0.00383511	0.520219	9.57509
JMJD1C	1.46692	4.42657e-76	4.79672e-74	0.0797128	640.785
USP6NL	1.46676	8.71147e-32	2.18134e-30	0.125915	167.634
SPAG1	1.46674	6.9179e-20	9.13424e-19	0.162714	85.7122
FEM1B	1.46497	3.54609e-37	1.07494e-35	0.115652	207.272
LOC103223665	1.46479	9.53763e-05	0.000303976	0.403678	17.7671
SLC25A38	1.46412	3.3773e-18	4.01761e-17	0.170564	88.0505
PTPRH	1.46373	1.72578e-16	1.81279e-15	0.180412	75.6367
LOC103244222	1.4636	1.28569e-06	5.39063e-06	0.316168	23.6659
HECTD4	1.4635	1.02713e-59	6.63241e-58	0.0901271	370.859
AP1S3	1.46346	0.000359847	0.00103792	0.449895	12.4298
LOC103223017	1.46335	8.46163e-07	3.62106e-06	0.310876	25.5724
SMTN	1.4626	5.6515e-24	9.39675e-23	0.146239	134.895
SOCS5	1.46199	7.22067e-26	1.34931e-24	0.140327	142.508
ZNF805	1.46184	3.01263e-09	1.73392e-08	0.254021	32.2892
TCP1	1.46029	1.08956e-22	1.69923e-21	0.150498	129.911
DIAPH3	1.46002	3.44696e-11	2.39031e-10	0.225415	53.479
EIF5A2	1.45985	1.69085e-10	1.10315e-09	0.234385	38.1074
SPRTN	1.45826	4.69708e-08	2.35166e-07	0.276811	30.2854
TLK2	1.45811	1.12164e-47	5.01148e-46	0.10104	286.108
FAM160B1	1.45733	1.72315e-19	2.23606e-18	0.163368	95.64
TDG	1.45706	8.36171e-14	7.26879e-13	0.198726	71.2359
PDGFA	1.45688	4.046e-20	5.41814e-19	0.160479	81.0471
LOC103221998	1.4565	4.74341e-07	2.10193e-06	0.301181	27.6808
LOC103222011	1.45638	2.83706e-25	5.13859e-24	0.141654	122.865
ABCA4	1.45511	0.000760724	0.00206381	0.476651	20.9985
HNRNPDL	1.45457	3.83914e-53	1.99413e-51	0.0951888	420.581
ZNF317	1.45351	6.59113e-13	5.3406e-12	0.206484	78.9969
C1H11orf84	1.4515	4.46441e-24	7.46246e-23	0.144819	111.416
AXIN1	1.45137	3.8988e-35	1.10213e-33	0.118157	178.073
DCP2	1.45128	3.82597e-20	5.13808e-19	0.159748	79.7705
DLG1	1.45092	1.02213e-31	2.54252e-30	0.124705	142.139
LOC103221768	1.45078	0.000350579	0.00101383	0.444105	12.4255
SOX4	1.45071	0.00223635	0.00553001	0.541975	9.63047
NKX2-6	1.45039	0.00297787	0.00716992	0.560583	7.97298
BYSL	1.45024	3.79454e-15	3.6281e-14	0.187625	76.2
NEDD4	1.4502	1.77787e-32	4.59831e-31	0.123071	166.475
BACH1	1.45015	9.2491e-28	1.92485e-26	0.133821	136.487
B3GNT9	1.44941	0.000855826	0.00229506	0.482754	8.67703
C2CD2	1.44902	1.63864e-10	1.07019e-09	0.23271	34.5944
TBC1D22B	1.44801	9.0453e-25	1.58503e-23	0.142248	153.75
N4BP1	1.44754	1.92013e-24	3.30027e-23	0.143165	112.308
NOTCH2	1.44751	1.42542e-80	1.72284e-78	0.0763764	632.581
ARHGAP39	1.44745	6.61216e-25	1.17838e-23	0.141875	111.98
REXO1	1.44699	3.41113e-35	9.65718e-34	0.117671	165.481
CDKL3	1.44627	0.000119842	0.000375915	0.404713	17.4922
REST	1.4457	9.12604e-42	3.36735e-40	0.107376	180.693
CASP10	1.44459	0.00416818	0.00969275	0.587226	7.21069
ZNF250	1.44322	1.29026e-13	1.1038e-12	0.198401	55.6062
ZNF398	1.44298	3.0072e-30	7.05234e-29	0.127221	123.264
REV3L	1.44278	2.9186e-51	1.43308e-49	0.0961927	384.346
DIP2B	1.44267	2.78062e-58	1.74181e-56	0.0894925	410.812
RCOR1	1.44039	1.03418e-23	1.69708e-22	0.144859	85.6525
SLC6A9	1.44025	0.000296165	0.000866707	0.433359	9.46465
TMEM79	1.43971	8.24479e-06	3.07424e-05	0.340666	16.2166
LOC103226875	1.43912	0.000595025	0.00164504	0.461049	8.85188
[truncated: 3,712 more rows]

## Sheet: Infected_vs_NonInfected_HBEday4
gene	log2FoldChange	pvalue	padj	lfcSE	baseMean
IFIT2	3.33892	1.72427e-158	4.35153e-154	0.124829	548.587
OAS3	2.08404	1.38558e-127	1.74839e-123	0.0871231	833.963
IFIT3	2.18355	1.42869e-93	1.20187e-89	0.107055	527.772
RSAD2	2.72549	5.89136e-93	3.717e-89	0.134069	383.666
SAMD9L	2.03476	1.53937e-83	7.76981e-80	0.105804	523.466
MX2	2.06725	3.27919e-80	1.37928e-76	0.109772	491
IFIT1	2.08305	5.15991e-75	1.86029e-71	0.114542	448.042
HELZ2	1.64264	6.18467e-66	1.95103e-62	0.0966127	629.96
DDX58	2.11305	1.18392e-65	3.31985e-62	0.124569	381.835
OAS2	1.52509	6.2488e-65	1.57701e-61	0.0904042	670.537
MX1	1.50634	6.6779e-64	1.53209e-60	0.0900778	726.317
HIVEP2	1.59261	7.68852e-63	1.61696e-59	0.0960371	613.025
SAMD9	1.51741	9.69119e-62	1.88136e-58	0.092387	681.488
KRT6A	1.70421	2.25347e-58	4.0622e-55	0.106878	490.175
IFI44L	1.68931	6.00795e-58	1.01082e-54	0.106346	488.923
JUN	1.535	3.15238e-54	4.97229e-51	0.100032	554.072
RNF213	0.83254	2.43536e-52	3.61537e-49	0.0551465	2134.83
OASL	3.88249	4.62103e-52	6.47893e-49	0.257571	159.994
IFIH1	1.87946	1.20258e-51	1.59734e-48	0.125684	360.543
HERC6	1.52858	1.82115e-48	2.29802e-45	0.105733	477.286
STAT1	1.11493	7.02385e-44	8.441e-41	0.0812106	803.806
NR1D1	2.97483	7.69967e-44	8.83257e-41	0.217036	162.769
DDX60L	1.76367	1.27918e-43	1.40359e-40	0.129071	327.189
ABCA13	-0.686567	7.05042e-43	7.41381e-40	0.0504577	2492.09
SYNE1	-0.656864	9.8617e-42	9.95519e-39	0.0489578	2720.88
DDX60	1.3672	1.59683e-40	1.54997e-37	0.104034	485.28
DNAH11	-0.841037	7.12188e-38	6.65685e-35	0.066154	1314.5
DNAH5	-0.749146	2.55492e-37	2.3028e-34	0.0593399	1817.63
TNFAIP3	1.11066	3.29439e-37	2.86691e-34	0.0883874	670.112
DNAH9	-0.748771	5.52711e-37	4.64959e-34	0.0595922	1669.61
DNAH10	-0.909347	9.80574e-37	7.98282e-34	0.0727665	1091.09
OAS1	1.7495	3.49982e-36	2.76015e-33	0.141626	272.313
XACT	2.69659	2.3894e-35	1.82731e-32	0.22074	146.513
CMPK2	2.00942	2.49321e-35	1.85062e-32	0.164785	210.739
ISG15	2.08038	3.99638e-35	2.88162e-32	0.171156	201.122
CEACAM5	2.05245	1.40718e-34	9.86474e-32	0.170183	205.987
KRT17	1.22775	1.56295e-34	1.06606e-31	0.101794	496.475
GADD45B	2.73225	3.09651e-34	2.05649e-31	0.22772	133.763
CROCC	-0.939675	6.15014e-33	3.97977e-30	0.0797978	995.048
IDO1	2.69324	1.52537e-32	9.62393e-30	0.230727	128.949
CXCL10	4.42183	3.7015e-32	2.27841e-29	0.377865	96.1723
ZBTB10	1.5307	4.1726e-32	2.50724e-29	0.132161	302.167
RP1	-0.90554	9.10066e-32	5.34124e-29	0.0783791	896.561
DNAH3	-0.734862	1.17619e-31	6.74627e-29	0.0635924	1545.1
MAP1A	-0.782492	1.67696e-31	9.40478e-29	0.0679396	1236.28
PLAU	2.28327	5.3868e-31	2.89248e-28	0.20124	157.295
DYNC2H1	-0.888988	5.29314e-31	2.89248e-28	0.0779487	992.864
DNAH1	-0.861876	1.45842e-29	7.66794e-27	0.0775481	932.818
PER1	1.13277	2.36897e-29	1.22012e-26	0.10261	494.431
NWD1	-0.887491	1.35871e-28	6.72347e-26	0.0813506	832.743
EPSTI1	1.72022	2.04982e-28	9.94831e-26	0.158966	215.052
MUC5AC	1.63335	4.03205e-28	1.91994e-25	0.151793	233.188
DNAH12	-0.752732	1.15317e-27	5.38938e-25	0.0701184	1168.5
HELLPAR	2.51961	4.88245e-27	2.24034e-24	0.239191	113.653
HERC5	2.13085	1.15463e-26	5.20348e-24	0.203944	142.408
THBS1	1.66586	1.58361e-26	7.01152e-24	0.159937	210.942
PARP14	0.76498	5.45379e-26	2.33284e-23	0.0737551	1004.35
KRT14	1.97799	5.37297e-26	2.33284e-23	0.192049	163.093
ABHD2	-0.817516	1.83354e-25	7.71219e-23	0.0797968	847.17
TGM1	2.75504	2.93565e-25	1.21454e-22	0.271358	95.0511
CCND1	1.15818	3.2375e-25	1.31782e-22	0.11413	387.163
CHST9	-0.904787	8.92746e-25	3.52035e-22	0.0897859	667.189
DNAH6	-0.748452	9.39734e-25	3.64862e-22	0.0741247	1050.12
DLEC1	-0.985063	1.4169e-24	5.41792e-22	0.0983128	576.024
PML	1.07459	3.79029e-24	1.42769e-21	0.108394	435.414
LRP1	-0.929945	8.96882e-24	3.32862e-21	0.0944787	624.408
IL1RN	2.56473	1.2673e-23	4.63521e-21	0.262433	95.4658
WARS1	1.03409	2.43334e-23	8.64932e-21	0.106278	447.226
DNAH2	-0.785949	3.05292e-23	1.07009e-20	0.0806666	840.657
ATF3	1.34129	3.39111e-23	1.17235e-20	0.138743	274.748
ATP10B	1.3917	5.96298e-23	2.0065e-20	0.144811	244.772
ERICH3	-0.638489	4.32252e-22	1.43536e-19	0.0671827	1248.58
ZNFX1	0.69051	6.81851e-22	2.23479e-19	0.0731259	1008.53
VWA3A	-0.987108	7.78011e-22	2.51726e-19	0.105253	493.737
IFT172	-0.834626	1.15124e-21	3.67771e-19	0.0892036	697.6
HDAC9	1.09456	1.59652e-21	5.03644e-19	0.11785	365.246
DMD	-0.799893	1.65312e-21	5.1506e-19	0.0857627	745.628
COLCA1	-1.24505	2.67744e-21	8.24031e-19	0.135002	295.23
CFAP65	-0.91194	5.28365e-21	1.60655e-18	0.0992858	547.029
HYDIN	-0.735799	5.53649e-21	1.66338e-18	0.0798808	838.07
CLMN	-0.691603	6.15822e-21	1.82841e-18	0.0750927	959.888
TNC	1.15087	7.22439e-21	2.12002e-18	0.126239	329.866
PARP9	1.04776	1.48249e-20	4.30042e-18	0.115795	383.354
LRRIQ1	-0.86403	1.57199e-20	4.50823e-18	0.0952339	590.937
APOL1	1.00957	1.81748e-20	5.15369e-18	0.11175	416.221
DTX3L	0.97585	2.40627e-20	6.74744e-18	0.10832	425.711
ABCC5	-1.11226	5.96314e-20	1.65375e-17	0.125062	344.952
CFAP43	-0.671089	7.82281e-20	2.14592e-17	0.0750837	960.577
MAP1B	-0.889704	9.20759e-20	2.49862e-17	0.100287	555.558
CDHR3	-0.73788	9.63844e-20	2.58772e-17	0.0829242	820.424
EGR1	0.951829	1.09762e-19	2.91586e-17	0.107638	441.246
SLC6A14	1.13457	1.49929e-19	3.94141e-17	0.129141	303.111
IRF7	1.50762	1.71654e-19	4.46601e-17	0.172334	175.178
IFI44	1.21942	2.06772e-19	5.32481e-17	0.139538	267.711
LAMP3	1.35572	2.36789e-19	6.03622e-17	0.155452	215.228
EIF2AK2	0.809838	3.9748e-19	1.00312e-16	0.0928247	587.04
CXCL8	1.29256	4.05655e-19	1.01362e-16	0.149239	228.095
CC2D2A	-0.841353	4.59049e-19	1.13579e-16	0.0966793	559.205
IFITM1	1.56875	4.64693e-19	1.13859e-16	0.181832	166.818
CCN1	1.51042	4.70557e-19	1.14187e-16	0.174935	170.328
CFAP46	-0.732744	5.70497e-19	1.3712e-16	0.084227	749.888
DNAH7	-0.683276	6.27447e-19	1.49386e-16	0.0785121	893.764
CMTM4	-0.963086	1.21105e-18	2.85638e-16	0.112354	416.032
DUSP5	1.87021	1.62179e-18	3.78972e-16	0.220478	114.838
PTPRF	-0.619711	1.93681e-18	4.44356e-16	0.0721412	1074.99
KLHL6	-1.13106	2.39336e-18	5.44155e-16	0.133502	296.982
NR4A3	2.85988	3.52993e-18	7.95399e-16	0.339934	63.8504
AQP5	1.25209	3.95071e-18	8.82337e-16	0.149043	230.15
SP110	1.27397	4.04033e-18	8.94437e-16	0.15178	227.272
GBP1	1.10528	4.3527e-18	9.5521e-16	0.131568	290.208
TXNIP	0.783181	4.49888e-18	9.78779e-16	0.09269	587.713
FLNA	0.80611	4.60404e-18	9.93095e-16	0.0954918	607.058
TAP1	1.27715	4.96336e-18	1.06153e-15	0.152565	218.878
CELSR1	-0.562083	5.64659e-18	1.1975e-15	0.0662421	1269.41
MUC21	2.51559	5.79162e-18	1.21803e-15	0.301312	72.4533
KLHDC7B	1.40681	8.78892e-18	1.83311e-15	0.169537	179.811
GBP4	1.32594	1.03402e-17	2.13898e-15	0.160105	200.386
FAM227A	-0.989821	1.12189e-17	2.30188e-15	0.119162	367.806
STK36	-1.09164	1.47088e-17	2.99359e-15	0.132159	320.522
CROCC2	-1.15601	1.74256e-17	3.49024e-15	0.140377	275.694
KATNIP	-0.821813	1.73485e-17	3.49024e-15	0.0992176	529.665
CFAP74	-0.892657	3.71029e-17	7.31535e-15	0.109142	436.947
CEACAM1	2.18666	4.85046e-17	9.41623e-15	0.270605	82.161
KNDC1	-1.04003	6.354e-17	1.22409e-14	0.128567	327.095
ALMS1	-0.649711	7.55786e-17	1.44498e-14	0.0797204	837.903
AMOTL2	1.08705	7.70651e-17	1.46233e-14	0.134888	282.801
FHAD1	-0.722854	1.05094e-16	1.97931e-14	0.0893745	676.811
KRT13	1.78249	1.25317e-16	2.34268e-14	0.223778	114.077
CPM	2.40383	1.41405e-16	2.60485e-14	0.302087	70.7832
TENT5A	1.30546	1.54053e-16	2.81728e-14	0.164146	191.273
HK2	1.22703	1.81804e-16	3.27728e-14	0.154536	214.965
GJB2	1.48894	1.81639e-16	3.27728e-14	0.187948	148.285
CCDC187	-1.11816	1.84317e-16	3.29901e-14	0.140805	663.409
DZIP1L	-0.9176	1.91778e-16	3.40838e-14	0.115083	389.964
BAIAP3	-0.956057	2.73632e-16	4.82913e-14	0.120658	355.353
IGSF10	-1.08284	2.87972e-16	5.04691e-14	0.13706	277.886
ARFGEF3	-0.669962	3.98626e-16	6.93802e-14	0.0843752	736.078
CCDC40	-0.786186	4.23008e-16	7.31195e-14	0.0995051	532.679
PKD1	-0.932619	4.7266e-16	8.11463e-14	0.118667	374.221
CEACAM6	0.818708	8.39455e-16	1.43144e-13	0.104871	455.43
LRIG1	-0.84769	9.20217e-16	1.55862e-13	0.108817	447.632
AK9	-0.852405	1.11268e-15	1.87204e-13	0.109771	434.825
WDR90	-0.985031	1.36968e-15	2.27413e-13	0.127702	335.279
SPAG17	-0.657942	1.47493e-15	2.43287e-13	0.0845765	744.352
VWA3B	-0.840538	1.7272e-15	2.83048e-13	0.108997	434.393
CFAP44	-0.778537	1.95106e-15	3.1767e-13	0.10097	504.062
ODAD1	-0.866562	2.10978e-15	3.41311e-13	0.112868	457.418
STAT2	0.874412	2.13987e-15	3.43973e-13	0.11394	399.744
KLF10	1.01333	5.11285e-15	8.16664e-13	0.134452	285.811
APOL6	0.788432	5.28047e-15	8.38134e-13	0.104041	458.705
CFAP47	-0.755702	5.399e-15	8.51591e-13	0.0996331	552.734
IFI6	0.892503	5.73051e-15	8.98266e-13	0.118313	359.113
NCOA7	0.891172	6.0475e-15	9.42104e-13	0.118226	355.414
CDHR4	-0.98743	6.42061e-15	9.94091e-13	0.131385	310.28
TFCP2L1	-0.79631	6.53577e-15	1.00575e-12	0.105485	472.547
IFI35	1.52946	7.19534e-15	1.10054e-12	0.205333	130.22
KIAA2012	-0.884815	8.15218e-15	1.23938e-12	0.117985	417.24
UBXN10	-0.748162	8.71093e-15	1.31639e-12	0.0994144	528.406
IFI16	0.851209	1.02173e-14	1.53485e-12	0.113866	401.779
MACC1	0.822544	1.29443e-14	1.92162e-12	0.110339	412.26
SCEL	2.15697	1.46202e-14	2.15772e-12	0.293894	74.3857
SPEF2	-0.684651	1.78759e-14	2.62288e-12	0.091913	615.323
ANK3	-0.658484	1.83666e-14	2.67929e-12	0.08834	666.385
SRGAP3	-0.888643	2.15495e-14	3.12554e-12	0.120525	353.89
EP400	-0.635212	2.50024e-14	3.60564e-12	0.08561	723.93
SECTM1	1.41734	3.53113e-14	5.06336e-12	0.195713	136.655
DZIP3	-0.727368	3.61686e-14	5.13714e-12	0.0990507	542.442
ISG20	1.61688	3.62329e-14	5.13714e-12	0.223658	110.468
KRT5	0.572278	5.34999e-14	7.5187e-12	0.0779374	867.13
NLRC5	1.4609	5.36262e-14	7.5187e-12	0.203355	131.246
MLXIP	-0.721179	6.14689e-14	8.57066e-12	0.0991527	525.512
EPHA2	0.730859	6.39651e-14	8.86972e-12	0.100637	500.288
RFX3	-0.696197	6.57299e-14	9.06462e-12	0.0957606	570.148
SERPINB2	1.41896	7.68521e-14	1.05408e-11	0.198815	132.514
RGS1	4.26145	8.28832e-14	1.13066e-11	0.585071	38.6971
TRIM5	1.47369	9.35614e-14	1.26268e-11	0.207492	125.269
LY6E	0.797657	1.05036e-13	1.41e-11	0.111164	426.25
MYO15B	-1.23671	1.07263e-13	1.43227e-11	0.173991	177.034
BATF2	2.13004	1.08032e-13	1.43495e-11	0.301354	69.6786
IFT140	-0.705737	1.1915e-13	1.57435e-11	0.0982057	542.326
FMN1	-0.800821	1.23121e-13	1.61833e-11	0.111904	411.137
CSRNP1	1.73375	1.25734e-13	1.64412e-11	0.245981	96.28
MSI2	-0.79463	1.5189e-13	1.9759e-11	0.111455	410.505
AQP4-AS1	-1.30681	1.59925e-13	2.06976e-11	0.185465	159.314
MAP3K19	-0.750725	2.0281e-13	2.59813e-11	0.105736	461.629
CCDC162P	-0.925744	2.41464e-13	3.07769e-11	0.131579	296.135
CXCL11	6.13238	2.53661e-13	3.21691e-11	0.827528	53.9449
SERPINB4	1.57782	2.82901e-13	3.56978e-11	0.227053	105.371
SIPA1L3	-0.6621	2.8575e-13	3.5878e-11	0.0935	589.903
PTGS2	1.87637	2.97973e-13	3.72275e-11	0.270561	77.6113
DUOX1	-0.631321	3.06596e-13	3.81161e-11	0.0891655	696.022
SYNGAP1	-0.899497	3.30484e-13	4.08844e-11	0.128597	325.323
CFAP157	-0.709832	3.85877e-13	4.72737e-11	0.10109	530.034
CHST6	-0.670158	5.04445e-13	6.15009e-11	0.0957539	566.493
CFAP251	-0.777585	5.10811e-13	6.19776e-11	0.111669	416.715
DYNC2I1	-0.740444	5.18669e-13	6.26299e-11	0.106202	454.145
TRANK1	0.733988	6.56124e-13	7.88504e-11	0.105754	453.49
COL17A1	0.772253	9.22465e-13	1.10333e-10	0.112259	421.777
KRT23	1.07206	1.0183e-12	1.21221e-10	0.157579	201.001
BIRC3	0.830238	1.09733e-12	1.30015e-10	0.121392	335.982
CEP290	-0.826272	1.12034e-12	1.32122e-10	0.120787	349.636
CCDC33	-1.07389	1.14092e-12	1.33922e-10	0.158178	213.287
CCDC170	-0.661157	1.23582e-12	1.44391e-10	0.0961981	592.378
EFHC1	-0.716745	1.24449e-12	1.44734e-10	0.104552	465.92
NEK10	-0.719262	1.28947e-12	1.49277e-10	0.105003	461.807
ALOX15	-0.588303	1.65787e-12	1.9018e-10	0.085776	766.053
LENG8	-0.704677	1.65347e-12	1.9018e-10	0.103376	508.011
SLC4A8	-1.05368	1.83759e-12	2.09843e-10	0.156675	217.021
DGKH	-0.6682	2.57256e-12	2.9245e-10	0.0987402	544.824
PTPRT	-0.673911	2.71183e-12	3.06899e-10	0.0997202	526.742
CCDC17	-0.688607	2.93033e-12	3.30146e-10	0.102201	556.947
SPRR1B	2.1146	3.25158e-12	3.64712e-10	0.321183	59.5456
TRAK1	-0.593647	3.29988e-12	3.68492e-10	0.0878391	694.875
TLR2	1.36022	3.95608e-12	4.39822e-10	0.206933	123.045
XAF1	1.41639	4.71985e-12	5.22434e-10	0.216554	113.936
TJP1	0.628232	4.84266e-12	5.33687e-10	0.0939224	589.615
EXPH5	-0.604666	4.87214e-12	5.34601e-10	0.0902809	633.967
BCAS1	-0.891711	4.98067e-12	5.44144e-10	0.134966	280.94
ZFHX2	-0.871922	5.07969e-12	5.5257e-10	0.13192	300.063
EDN1	2.52886	6.80853e-12	7.37454e-10	0.389911	45.5201
DNAL1	-0.894048	7.51004e-12	8.09961e-10	0.136616	278.282
LDLR	0.645032	7.74637e-12	8.31894e-10	0.0975382	589.196
SFN	1.06174	7.8771e-12	8.42349e-10	0.163255	190.539
FGFBP1	1.36119	8.17436e-12	8.70449e-10	0.210439	120.913
PLA2G4C	2.99241	8.79151e-12	9.32232e-10	0.462452	38.0626
GPRC5A	0.73371	9.44938e-12	9.97799e-10	0.111994	408.872
TOGARAM2	-0.775656	9.54631e-12	1.00383e-09	0.118631	364.303
MYD88	1.07455	9.81482e-12	1.02354e-09	0.1661	180.773
MAPK10	-0.816124	9.77572e-12	1.02354e-09	0.125097	325.728
CCDC190	-0.878187	1.06695e-11	1.10551e-09	0.135191	280.861
SNED1	-1.20163	1.06885e-11	1.10551e-09	0.186595	162.495
ADGRV1	-0.76936	1.10013e-11	1.12861e-09	0.118002	363.815
PLCB4	-0.84629	1.09888e-11	1.12861e-09	0.130199	301.589
PLAUR	2.3063	1.18087e-11	1.20654e-09	0.360466	51.6814
IQCE	-0.674958	1.23594e-11	1.25772e-09	0.103334	504.993
UBE2L6	1.11281	1.26355e-11	1.28065e-09	0.173306	175.262
LTBP1	1.80458	1.53358e-11	1.54812e-09	0.284064	69.9418
RPGRIP1L	-0.815046	1.66344e-11	1.67252e-09	0.126465	316.562
NBEA	-0.549894	1.69941e-11	1.70191e-09	0.0841342	731.34
AK7	-0.737951	1.72255e-11	1.71826e-09	0.11421	388.73
RND3	0.875637	1.77957e-11	1.76815e-09	0.13652	283.536
SP100	0.659538	1.88292e-11	1.85622e-09	0.101872	496.457
MAPK15	-0.949125	2.40229e-11	2.35901e-09	0.149403	250.703
ZC3HAV1	0.681252	2.48676e-11	2.4325e-09	0.106038	435.926
CFAP54	-0.574741	2.55109e-11	2.48579e-09	0.0888964	675.034
SERPINB3	0.683348	2.68322e-11	2.60448e-09	0.106587	458.768
CCDC57	-0.766592	2.72741e-11	2.63723e-09	0.120103	362.723
GTF3C1	-0.590644	3.00425e-11	2.89383e-09	0.0918237	618.496
MAVS	-0.658488	3.26898e-11	3.13686e-09	0.103027	482.138
C21orf58	-1.02244	3.43517e-11	3.28384e-09	0.162596	198.465
TBC1D8	-0.678634	3.87253e-11	3.68796e-09	0.106751	452.311
ARRDC3	0.690356	3.9263e-11	3.72511e-09	0.108704	413.988
KIF21A	-0.61041	4.27444e-11	4.04023e-09	0.095829	551.647
IGFBP5	-0.59459	4.41829e-11	4.16062e-09	0.0933293	589.226
NFKBIA	0.764697	4.58052e-11	4.29734e-09	0.121359	332.332
GRHL3	1.77658	4.70233e-11	4.37907e-09	0.287658	68.1062
PRRT3	-1.37792	4.74526e-11	4.4028e-09	0.222399	114.659
SLC6A6	-0.561565	4.83155e-11	4.46644e-09	0.0881254	672.678
EGR2	3.07863	5.36879e-11	4.94497e-09	0.496054	33.7069
PARP10	0.864932	5.8144e-11	5.33593e-09	0.138673	260.811
TOR1B	1.24689	5.8931e-11	5.38855e-09	0.202102	125.029
MAP6	-0.789862	6.26003e-11	5.70341e-09	0.126467	323.076
IFITM3	0.997525	6.58054e-11	5.97386e-09	0.161217	192.696
DDIT3	1.56794	7.03006e-11	6.35905e-09	0.256386	83.0425
CCDC146	-0.629446	7.62083e-11	6.86882e-09	0.100366	514.271
PNPT1	1.02866	7.84932e-11	7.04958e-09	0.16712	182.606
TNFSF10	0.684653	7.93904e-11	7.10488e-09	0.109655	411.312
ZBP1	3.85275	8.12715e-11	7.24752e-09	0.61763	30.0192
RSPH3	-0.694721	8.47798e-11	7.53376e-09	0.111508	404.818
DRC3	-0.754881	8.66951e-11	7.67693e-09	0.121634	342.521
KRT6B	2.11184	9.19684e-11	8.11541e-09	0.348213	51.4866
IGF1R	-0.534206	9.67724e-11	8.50957e-09	0.0851028	723.363
ZKSCAN1	-0.551103	9.71234e-11	8.51078e-09	0.0879172	716.607
PARP12	0.936584	9.96134e-11	8.69877e-09	0.152696	210.418
CREB5	3.0623	1.04243e-10	9.07167e-09	0.501192	33.1452
LRRC56	-0.990368	1.06331e-10	9.22157e-09	0.161964	197.45
MYRFL	2.46773	1.12671e-10	9.73792e-09	0.407034	40.8739
ICAM1	1.18023	1.14164e-10	9.83326e-09	0.194488	135.133
EFCAB12	-0.938723	1.1875e-10	1.01936e-08	0.153708	219.742
TRIM22	0.641437	1.2827e-10	1.09734e-08	0.103728	454.609
LRBA	-0.509682	1.30021e-10	1.10483e-08	0.0816342	785.509
CYLD	0.800918	1.30854e-10	1.10817e-08	0.130752	286.535
INSR	-0.522252	1.37473e-10	1.16034e-08	0.0838545	735.735
ALDH3B1	-0.658609	1.38682e-10	1.16664e-08	0.106825	451.459
SDK1	-0.726918	1.61772e-10	1.35187e-08	0.118859	372.591
SHANK2	-0.695867	1.61669e-10	1.35187e-08	0.113547	394.869
DNAI1	-0.683048	1.72413e-10	1.43604e-08	0.111587	412.212
FRMPD2	-0.923322	1.769e-10	1.46856e-08	0.152707	222.303
MKI67	0.900165	1.85509e-10	1.53498e-08	0.14897	223.772
MAPK8IP3	-0.841398	1.95172e-10	1.60966e-08	0.139083	264.732
KIAA1671	-0.563568	2.14149e-10	1.76042e-08	0.0918109	630.441
ORAI2	-0.902189	2.15597e-10	1.76084e-08	0.149896	231.081
AKNA	-0.640128	2.15527e-10	1.76084e-08	0.104883	468.269
IGFBP3	0.569456	2.23378e-10	1.81832e-08	0.092926	578.099
EMP1	1.68959	2.24074e-10	1.81832e-08	0.285678	76.0579
LRRC8A	0.784386	2.31957e-10	1.87625e-08	0.129939	298.955
CEP126	-0.726793	2.34186e-10	1.88822e-08	0.119977	361.448
HIPK1	-0.502798	2.6854e-10	2.15833e-08	0.0819958	766.542
CEP250	-0.645632	2.77482e-10	2.22312e-08	0.106551	471.424
METTL7A	-0.691721	3.17265e-10	2.52581e-08	0.11488	380.198
LDLRAD4	-0.96549	3.19167e-10	2.53296e-08	0.162529	197.99
ADAM8	1.54636	3.33203e-10	2.63606e-08	0.263701	80.2885
TNFAIP8L1	-0.785068	3.74864e-10	2.95639e-08	0.131697	291.723
CCNL1	0.808932	3.80141e-10	2.98866e-08	0.135942	264.881
DTHD1	-0.535636	3.95115e-10	3.09674e-08	0.0884696	654.793
TTLL10	-0.920195	4.00425e-10	3.12865e-08	0.155615	213.809
CIITA	-0.632968	4.2872e-10	3.33938e-08	0.105583	457.426
MEGF8	-0.788553	4.54928e-10	3.53262e-08	0.133041	291.557
EFHB	-0.850111	4.60154e-10	3.56224e-08	0.143845	246.892
MPDZ	-0.671573	5.0981e-10	3.93458e-08	0.11286	399.577
TTC3	-0.58482	5.36956e-10	4.13145e-08	0.0977992	544.21
SPAG8	-1.03439	5.39095e-10	4.1353e-08	0.177085	166.571
FOSB	1.84926	5.5697e-10	4.25947e-08	0.320232	58.4362
KRT7	0.617389	5.89675e-10	4.49596e-08	0.103815	498.031
ANKMY1	-0.717016	5.93421e-10	4.51089e-08	0.121367	354.078
SCD	0.586546	6.8584e-10	5.19776e-08	0.0987674	506.131
AKAP6	-0.754297	7.05483e-10	5.33062e-08	0.128555	309.067
LDLRAD1	-0.720258	7.23439e-10	5.44069e-08	0.122659	364.996
GAS2L2	-0.782777	7.24362e-10	5.44069e-08	0.133778	289.555
RFX2	-0.726696	7.34982e-10	5.50408e-08	0.123805	356.872
DNAAF1	-0.550421	8.05326e-10	6.01302e-08	0.0928186	588.269
NFKB2	0.955324	8.44228e-10	6.28489e-08	0.16537	189.63
TNFSF13B	3.24795	8.7586e-10	6.5012e-08	0.562636	28.0233
CCDC191	-0.77406	8.78713e-10	6.50325e-08	0.132902	297.757
IRAK2	1.47362	8.92504e-10	6.586e-08	0.258321	84.5413
IL5RA	-0.758487	9.17362e-10	6.7497e-08	0.130297	296.852
FAM216B	-0.591813	9.6972e-10	7.11419e-08	0.100661	502.431
WDFY4	4.66942	1.01824e-09	7.44852e-08	0.782844	27.1376
NEK5	-0.865423	1.03926e-09	7.57697e-08	0.14999	237.912
TSPOAP1	-0.787915	1.04181e-09	7.57697e-08	0.13612	278.444
SFXN3	-1.07824	1.0482e-09	7.60153e-08	0.188453	148.548
ELAPOR1	-0.959866	1.08973e-09	7.88009e-08	0.167313	186.332
DUSP8	1.71163	1.13811e-09	8.2064e-08	0.302978	61.3217
RAB36	-0.697639	1.16601e-09	8.38361e-08	0.120229	355.39
WNT9A	-1.0827	1.26259e-09	9.0523e-08	0.190357	148.179
ETV7	1.83583	1.34491e-09	9.61513e-08	0.326628	54.2884
CABIN1	-0.600608	1.41681e-09	1.01005e-07	0.10336	493.391
MYC	1.35104	1.44253e-09	1.02549e-07	0.239989	93.659
SAXO2	-0.749838	1.56371e-09	1.10852e-07	0.130765	293.462
LAP3	0.61324	1.58505e-09	1.1205e-07	0.105986	436.797
TEKT1	-0.667469	1.59099e-09	1.12156e-07	0.115824	376.754
PLXNB1	-0.511685	1.6371e-09	1.15085e-07	0.0877426	719.398
KLF6	0.668355	1.70923e-09	1.19822e-07	0.116276	364.841
GRIN2B	2.58391	1.74305e-09	1.21854e-07	0.461884	36.1022
NIN	-0.653704	2.21262e-09	1.54254e-07	0.11442	383.822
C2orf50	-0.924465	2.27795e-09	1.5798e-07	0.164534	194.078
ADGB	-0.687603	2.27859e-09	1.5798e-07	0.120804	362.53
MLKL	1.84408	2.39772e-09	1.65785e-07	0.334528	52.8972
LGALS9	1.01109	2.44526e-09	1.6861e-07	0.181063	152.819
DCDC1	-0.719745	2.52917e-09	1.73448e-07	0.12711	315.009
TTLL9	-0.950363	2.52427e-09	1.73448e-07	0.169837	179.468
CFAP57	-0.6537	2.78934e-09	1.89894e-07	0.115243	382.109
SOCS1	4.58428	2.79156e-09	1.89894e-07	0.792675	25.7307
DZIP1	-1.12505	2.79973e-09	1.89937e-07	0.2029	128.92
GIPR	-1.20637	2.84268e-09	1.92334e-07	0.218055	115.73
ANKRD33B	3.16771	2.87487e-09	1.93993e-07	0.570881	26.97
KCNH3	-1.17044	2.94284e-09	1.98049e-07	0.211667	124.223
TEKT2	-0.838075	3.12937e-09	2.10042e-07	0.150022	225.227
TP73	-0.675353	3.21016e-09	2.14894e-07	0.119755	349.755
SPATA18	-0.574601	3.24422e-09	2.16599e-07	0.101114	521.868
KRT4	0.94917	3.28044e-09	2.18439e-07	0.171136	169.749
CNTRL	-0.549238	3.33501e-09	2.21489e-07	0.0964813	539.821
CYFIP2	-0.847878	3.47122e-09	2.29929e-07	0.152344	219.657
TPPP	-0.736892	3.54229e-09	2.34023e-07	0.13165	299.802
TROAP-AS1	-1.24649	3.73853e-09	2.46343e-07	0.227577	105.63
SMARCA2	-0.506151	3.79166e-09	2.49193e-07	0.0889063	669.59
CASC2	-0.951843	3.93718e-09	2.57416e-07	0.17258	174.946
PMAIP1	1.40872	3.92838e-09	2.57416e-07	0.258563	81.2634
MIR4435-2HG	1.44835	4.42884e-09	2.88069e-07	0.26705	75.6147
DENND4A	0.71223	4.50748e-09	2.9243e-07	0.128003	295.792
LAMA3	0.702932	4.5728e-09	2.95907e-07	0.126328	309.932
NFIA	-0.646739	4.77675e-09	3.08314e-07	0.115828	377.548
DIXDC1	-0.858015	4.843e-09	3.11793e-07	0.155863	212.391
C6orf118	-0.857869	5.07523e-09	3.25913e-07	0.156074	209.266
ALDH3A1	-0.528611	5.17849e-09	3.31699e-07	0.0939445	582.018
NFKBIZ	0.685639	5.27443e-09	3.36989e-07	0.12359	322.441
FER1L5	-1.05412	5.28861e-09	3.37042e-07	0.193663	139.854
GOLGA2P5	-0.951848	5.32568e-09	3.38469e-07	0.174214	171.18
ODAD3	-0.822447	5.33782e-09	3.38469e-07	0.149631	235.629
GALNT5	0.910697	5.40698e-09	3.41995e-07	0.166542	185.372
ARNTL2	1.01764	5.85759e-09	3.6957e-07	0.18748	142.151
IFIT5	1.02472	6.13354e-09	3.86015e-07	0.189199	150.509
C14orf132	-1.03523	6.3675e-09	3.99743e-07	0.191216	144.617
MAP9	-0.757826	6.62521e-09	4.14889e-07	0.138306	269.036
OVOL1	2.55971	6.84098e-09	4.27341e-07	0.478198	31.1711
PZP	-0.904672	6.91452e-09	4.30869e-07	0.166603	184.862
KIF19	-0.642785	7.38655e-09	4.59149e-07	0.116692	366.09
BRD3OS	-1.05046	7.48745e-09	4.64277e-07	0.19516	140.252
ANKFN1	-0.976592	8.65868e-09	5.35586e-07	0.182024	170.781
SANBR	-0.873702	8.86675e-09	5.45781e-07	0.162067	195.722
SORL1	-0.92994	8.85006e-09	5.45781e-07	0.172952	176.235
S100P	1.33219	9.27123e-09	5.69289e-07	0.251539	83.2609
C2CD3	-0.632514	9.31943e-09	5.7086e-07	0.115606	380.666
TMEM67	-0.792647	9.4126e-09	5.75171e-07	0.146652	239.669
CPEB2	1.15982	9.44681e-09	5.75868e-07	0.218434	114.85
CLCA4	1.88277	9.94831e-09	6.04784e-07	0.358279	46.7953
MMP13	1.22172	9.99307e-09	6.04784e-07	0.230738	97.2113
IFT88	-0.898565	9.98816e-09	6.04784e-07	0.167585	189.849
PARVA	-0.722814	1.08047e-08	6.5234e-07	0.133716	279.532
GCNT3	1.35948	1.10527e-08	6.65722e-07	0.25842	79.7302
ARMC3	-0.625818	1.19665e-08	7.19042e-07	0.115231	384.873
MAN1C1	-0.974762	1.20913e-08	7.24818e-07	0.183609	154.562
IFITM2	1.70568	1.23962e-08	7.41332e-07	0.326809	54.7886
MIR29B2CHG	-0.666925	1.35909e-08	8.1086e-07	0.123776	327.88
DSG3	1.23354	1.36355e-08	8.11599e-07	0.235574	93.3222
VWA7	-1.01304	1.38166e-08	8.20445e-07	0.192194	156.325
DRC1	-0.574322	1.40118e-08	8.30083e-07	0.105799	448.045
CCDC26	2.5039	1.43578e-08	8.48592e-07	0.480908	31.8032
EFCAB6	-0.698471	1.44636e-08	8.52848e-07	0.13025	299.237
ZBBX	-0.567489	1.45751e-08	8.57415e-07	0.104606	480.494
CHD1	0.618872	1.4728e-08	8.62389e-07	0.114685	370.109
CALCOCO1	-0.716482	1.47173e-08	8.62389e-07	0.133851	279.304
KRT16	1.93544	1.49115e-08	8.71116e-07	0.373067	44.4947
WNK2	-0.683709	1.55083e-08	9.01804e-07	0.127627	308.125
LRRC71	-0.908677	1.67448e-08	9.69237e-07	0.172589	172.331
PLSCR1	0.726774	1.69734e-08	9.80225e-07	0.136616	264.136
ADAMTS9	1.5522	1.72908e-08	9.94002e-07	0.300498	61.7365
SLFN13	-0.66918	1.72748e-08	9.94002e-07	0.125225	324.512
TMEM94	-0.716439	1.87504e-08	1.07546e-06	0.134985	274.976
PPP1R16A	-0.773242	1.89433e-08	1.08406e-06	0.146361	249.151
BACH2	2.57126	1.96321e-08	1.12094e-06	0.498225	29.7659
CFAP52	-0.684846	2.05059e-08	1.16819e-06	0.129087	298.879
KIF24	-0.826921	2.16674e-08	1.23157e-06	0.157773	209.873
METRN	-1.31809	2.19083e-08	1.24247e-06	0.256266	87.5532
CCDC68	2.49144	2.2976e-08	1.3001e-06	0.48616	30.0029
PROS1	-1.23231	2.41508e-08	1.36048e-06	0.239859	100.903
OPTN	0.553999	2.4121e-08	1.36048e-06	0.103764	450.281
CCDC78	-0.592926	2.54598e-08	1.42784e-06	0.111665	398.753
ABCA2	-0.988218	2.68129e-08	1.50039e-06	0.192039	300.365
S100A2	0.92102	2.69811e-08	1.50646e-06	0.178224	169.341
SLC16A1	1.53372	2.71272e-08	1.50795e-06	0.302104	64.9378
ARHGAP39	-0.699141	2.70996e-08	1.50795e-06	0.133246	282.122
RYR2	2.53465	2.7296e-08	1.514e-06	0.497451	29.2205
UNC13B	-0.592488	2.84085e-08	1.57225e-06	0.112004	400.093
CBX5	-0.552037	2.87382e-08	1.58702e-06	0.103951	466.339
BST2	0.83789	2.96599e-08	1.63434e-06	0.161883	188.01
TTC21A	-0.625919	2.99014e-08	1.64405e-06	0.118915	351.263
B9D1	-0.937355	3.02058e-08	1.65718e-06	0.182094	156.14
S100A16	1.0145	3.13741e-08	1.71755e-06	0.198263	127.877
IRS2	0.774996	3.16184e-08	1.72717e-06	0.149409	217.338
CFAP100	-0.65637	3.27605e-08	1.78569e-06	0.12545	316.767
ALS2CL	-0.672612	3.31862e-08	1.805e-06	0.128811	318.596
PIK3AP1	1.72139	3.36046e-08	1.82383e-06	0.342176	49.5372
LTBP3	-0.830025	3.41382e-08	1.84881e-06	0.161022	197.688
MYLK	-0.741651	3.53303e-08	1.90927e-06	0.143128	263.063
TNFRSF19	-0.790777	3.55473e-08	1.91515e-06	0.153219	216.022
EFCAB1	-0.699621	3.61947e-08	1.9435e-06	0.134744	280.631
LRGUK	-0.90353	3.63787e-08	1.94924e-06	0.176495	168.932
SAMD4A	1.52005	3.64585e-08	1.94937e-06	0.302674	60.0972
KIF3B	-0.522524	3.71107e-08	1.98005e-06	0.098961	515.356
HSH2D	1.21803	4.02617e-08	2.14364e-06	0.242014	90.5096
WDTC1	-0.659567	4.06349e-08	2.15895e-06	0.127067	314.236
CXCL2	1.39695	4.16104e-08	2.20614e-06	0.279107	70.1885
PLEKHB1	-0.822918	4.24735e-08	2.24718e-06	0.160845	198.607
STEAP4	0.943326	4.26442e-08	2.25149e-06	0.185931	149.188
PPM1H	-0.600211	4.36667e-08	2.29587e-06	0.115273	380.505
WDR19	-0.696564	4.50592e-08	2.36416e-06	0.135154	284.206
TRIM25	0.630437	4.52082e-08	2.36705e-06	0.121644	327.704
NT5C3A	1.15	4.53647e-08	2.37033e-06	0.229084	99.6033
MAFF	1.1037	4.6143e-08	2.40602e-06	0.2197	105.845
RHPN1	-0.838237	4.67342e-08	2.43182e-06	0.164604	193.696
TYMP	0.590732	4.68848e-08	2.43463e-06	0.113669	381.241
RSPH4A	-0.551355	4.76269e-08	2.46809e-06	0.105695	449.309
LDHA	0.717793	4.86346e-08	2.51515e-06	0.139969	250.185
MYO1E	-0.556616	4.88152e-08	2.51932e-06	0.106876	458.643
SLC7A5	1.25867	5.03309e-08	2.59224e-06	0.252443	83.1643
HACD4	-0.828239	5.36e-08	2.75499e-06	0.163343	191.726
SLC25A28	1.546	5.38183e-08	2.75499e-06	0.312789	59.2469
ACSS1	-0.921397	5.38099e-08	2.75499e-06	0.182782	155.157
ARHGEF28	-0.597184	5.71084e-08	2.9116e-06	0.115792	372.406
CPLANE1	-0.521535	5.84498e-08	2.97399e-06	0.100373	497.146
TSNAXIP1	-0.75385	5.87508e-08	2.98329e-06	0.148415	241.402
THEMIS2	2.85677	6.03184e-08	3.05674e-06	0.577022	24.5824
CXCL16	0.854293	6.1039e-08	3.08705e-06	0.169706	172.272
TMEM232	-0.924775	6.14508e-08	3.10167e-06	0.184376	166.581
SOCS3	1.28374	6.2001e-08	3.12319e-06	0.259949	79.308
MTURN	-0.988799	6.25895e-08	3.14655e-06	0.197975	134.274
ECT2L	-0.643815	6.33218e-08	3.17704e-06	0.12588	313.514
SRD5A2	-0.934352	6.35759e-08	3.17716e-06	0.186663	149.374
STEAP3	-0.659865	6.34613e-08	3.17716e-06	0.129257	302.769
RIBC1	-0.896333	6.49523e-08	3.23953e-06	0.178926	166.116
CAMK1D	-0.587722	6.67576e-08	3.323e-06	0.114522	404.59
MXD1	0.97773	6.97733e-08	3.46628e-06	0.196623	134.112
ANKRD26	-0.684584	7.03127e-08	3.48621e-06	0.13493	294.569
TP53INP1	-0.719824	7.04789e-08	3.4876e-06	0.142259	249.38
WDR27	-1.02439	7.20759e-08	3.55965e-06	0.206531	123.289
TRIM21	1.05376	7.25172e-08	3.57445e-06	0.213073	113.473
FYB2	-1.10262	7.37304e-08	3.62716e-06	0.223153	115.773
ABCC6	-0.891233	7.47769e-08	3.66436e-06	0.17873	160.369
COL21A1	-0.803235	7.57107e-08	3.70293e-06	0.160223	197.423
APOL2	0.778778	7.65509e-08	3.73678e-06	0.155232	204.752
CFAP70	-0.640107	7.88179e-08	3.84001e-06	0.126178	325.484
IQSEC1	-0.660088	7.95989e-08	3.87059e-06	0.130396	297.523
ATP9A	-0.502789	8.03203e-08	3.89816e-06	0.0976659	531.706
PCSK5	-0.659578	8.28522e-08	4.01332e-06	0.13052	312.917
ADH1C	-1.28517	9.38109e-08	4.51814e-06	0.264264	82.361
CCDC81	-1.02227	9.47244e-08	4.55345e-06	0.208317	121.334
PPM1K	1.03117	9.56474e-08	4.58908e-06	0.210564	116.921
ZNF618	1.11225	9.81884e-08	4.70205e-06	0.228124	103.231
ADCY9	-0.607006	9.86998e-08	4.71759e-06	0.120244	344.31
F3	0.705793	9.99847e-08	4.76997e-06	0.14132	248.206
PER3	0.848256	1.07165e-07	5.10286e-06	0.172195	166.615
THBS3	-0.95017	1.1046e-07	5.24989e-06	0.194156	137.678
FAM81A	-1.21933	1.14831e-07	5.44735e-06	0.252353	88.4111
C1orf158	-0.929949	1.15539e-07	5.47064e-06	0.190165	143.093
SLC25A29	-0.750316	1.17666e-07	5.56095e-06	0.151701	226.489
DNAI4	-0.554674	1.1977e-07	5.64977e-06	0.110068	428.596
SLC7A2	-0.593587	1.20735e-07	5.68467e-06	0.118309	352.843
LIF	1.33121	1.22844e-07	5.77319e-06	0.277345	70.0772
CFAP69	-0.760919	1.28317e-07	6.00803e-06	0.154486	212.567
MYH10	-0.562809	1.29267e-07	6.04132e-06	0.112091	399.722
EPHX1	-0.606521	1.29514e-07	6.04168e-06	0.121431	353.438
WHRN	-0.814903	1.31155e-07	6.10694e-06	0.166324	184.927
MRTFB	-0.574293	1.35934e-07	6.3178e-06	0.114774	392.176
HES1	0.868197	1.36748e-07	6.34396e-06	0.178315	158.919
MFSD6	-0.525273	1.42292e-07	6.56496e-06	0.104529	453.873
CNP	0.762739	1.42164e-07	6.56496e-06	0.155593	211.516
CDON	-1.10442	1.43771e-07	6.62107e-06	0.229942	105.736
ODF2L	-0.535907	1.47312e-07	6.7595e-06	0.106921	432.057
ZNF3	-0.726723	1.47154e-07	6.7595e-06	0.147992	243.643
ERBB4	-1.04059	1.47935e-07	6.77573e-06	0.216183	113.698
CMYA5	0.826931	1.50517e-07	6.88152e-06	0.169912	172.81
CRACDL	-0.543608	1.51239e-07	6.90203e-06	0.1087	434.925
NEDD4	1.28088	1.5535e-07	7.07685e-06	0.269283	73.0835
AGBL2	-0.754504	1.68288e-07	7.6524e-06	0.154756	217.691
FOS	0.650318	1.7694e-07	8.01951e-06	0.132484	289.72
HERC2	-0.554059	1.76997e-07	8.01951e-06	0.111556	446.733
CIART	1.83394	1.7813e-07	8.05638e-06	0.390901	39.7246
LATS2	0.946259	1.82896e-07	8.25714e-06	0.197633	129.152
TP63	0.745879	1.87067e-07	8.43038e-06	0.153652	206.202
MYCBPAP	-1.11857	1.87826e-07	8.44951e-06	0.235443	102.192
MAP3K8	0.864482	1.88404e-07	8.45427e-06	0.179802	153.517
ZNF440	-0.608265	1.88602e-07	8.45427e-06	0.123577	324.72
PPOX	-0.97371	1.92505e-07	8.61389e-06	0.203833	127.964
APPL2	-0.734978	2.05767e-07	9.1748e-06	0.151831	227.411
CD44	0.632518	2.09062e-07	9.30528e-06	0.129421	287.077
CD55	0.728298	2.11507e-07	9.39753e-06	0.150541	213.12
DNAI2	-0.652678	2.15471e-07	9.55685e-06	0.13403	287.11
NRAV	-0.652472	2.18509e-07	9.67456e-06	0.134017	280.172
STK33	-0.693897	2.2165e-07	9.79647e-06	0.143166	245.254
PEAK1	-0.550125	2.27228e-07	1.00255e-05	0.111842	396.616
WDR49	-0.510548	2.32777e-07	1.02524e-05	0.10338	468.481
NFIX	-0.523163	2.34867e-07	1.03084e-05	0.106141	449.589
SOX4	0.546092	2.41519e-07	1.0582e-05	0.111274	406.265
ZMYND10	-0.587734	2.48437e-07	1.08662e-05	0.120491	360.087
FARP1	-0.563667	2.53446e-07	1.10661e-05	0.115288	384.226
ARMC2	-0.756689	2.60209e-07	1.13418e-05	0.158127	203.1
TPM4	0.591782	2.64462e-07	1.15073e-05	0.121707	325.913
ODAD2	-0.645053	2.65637e-07	1.15385e-05	0.133494	289.794
IFI27	0.666057	2.70678e-07	1.17373e-05	0.138256	255.107
MS4A8	-0.69993	2.7898e-07	1.20765e-05	0.145916	249.8
GPBP1	0.645138	2.79554e-07	1.20807e-05	0.133747	274.776
BMF	-1.09946	2.85639e-07	1.23225e-05	0.235658	99.8136
APOBEC3A	3.48129	2.89695e-07	1.24761e-05	0.736894	19.0853
TEX9	-0.83026	2.91952e-07	1.25519e-05	0.175415	169.284
RTCA-AS1	-1.3632	2.96678e-07	1.27335e-05	0.294773	67.605
SNTN	-0.607375	3.15507e-07	1.34957e-05	0.126033	310.355
OXTR	-1.35498	3.24961e-07	1.38766e-05	0.294272	66.5148
RASGRP3	1.83761	3.30885e-07	1.41056e-05	0.402745	38.7389
TM4SF1	1.38888	3.39486e-07	1.44339e-05	0.303586	62.4656
INF2	0.769231	3.3973e-07	1.44339e-05	0.16286	187.214
LRRC10B	-0.665337	3.52943e-07	1.4945e-05	0.139719	281.464
PLEKHA4	0.670324	3.52546e-07	1.4945e-05	0.140745	249.915
STOML3	-0.888793	3.61385e-07	1.52769e-05	0.190418	148.519
SPATS2L	0.557687	3.62535e-07	1.52998e-05	0.115681	359.459
GCLC	-0.532618	3.65006e-07	1.53784e-05	0.110155	408.784
PLCH1	-0.563514	3.67135e-07	1.54423e-05	0.117	372.926
C5orf64	3.26025	3.71498e-07	1.55998e-05	0.702454	19.1838
CSF1	0.940123	3.77429e-07	1.58226e-05	0.20252	122.215
EVL	-0.831154	3.91271e-07	1.63485e-05	0.177838	161.044
ZBTB4	-0.539054	3.9496e-07	1.64754e-05	0.111938	392.859
JUNB	0.646138	4.01926e-07	1.67383e-05	0.136118	277.069
TRIM14	0.635182	4.06225e-07	1.68617e-05	0.133645	268.934
TBC1D16	-0.668156	4.05804e-07	1.68617e-05	0.141061	269.344
TCTN2	-0.802833	4.08743e-07	1.69384e-05	0.17172	172.433
ABCA7	-0.577295	4.19531e-07	1.73569e-05	0.120752	341.144
NPHP1	-0.615613	4.22576e-07	1.74543e-05	0.12946	300.126
GAS7	-0.751447	4.30281e-07	1.77435e-05	0.160423	199.706
TTC12	-0.715581	4.37505e-07	1.79826e-05	0.152345	219.322
CD83	3.27385	4.49389e-07	1.84236e-05	0.709664	19.144
EML1	-0.751374	4.66894e-07	1.90972e-05	0.160914	194.576
PCNT	-0.555079	4.7384e-07	1.935e-05	0.116376	366.882
CCDC30	-0.600297	4.98275e-07	2.03127e-05	0.126889	307.956
ULK4	-0.654496	4.99024e-07	2.03127e-05	0.139189	260.973
IRF1	0.702072	5.01076e-07	2.03634e-05	0.150191	213.621
GDF15	0.760015	5.3113e-07	2.155e-05	0.163879	181.949
CLSPN	1.76167	5.659e-07	2.29239e-05	0.395885	38.2168
SPATA6	-0.756059	5.68364e-07	2.29869e-05	0.163507	196.467
ICA1L	-0.861945	5.7955e-07	2.34018e-05	0.188227	146.52
PRKCD	-0.656345	5.98505e-07	2.4062e-05	0.140768	250.598
MNS1	-0.655471	5.98761e-07	2.4062e-05	0.140537	256.147
GRIN3B	-0.895387	6.05876e-07	2.43092e-05	0.196443	137.343
WDR38	-0.676304	6.14488e-07	2.46112e-05	0.14553	233.989
UACA	-0.710351	6.15352e-07	2.46112e-05	0.153512	228.293
NMI	1.00597	6.40048e-07	2.55584e-05	0.223185	105.687
C5orf49	-0.733449	6.45887e-07	2.57508e-05	0.159132	197.829
TUB	-0.72045	6.66478e-07	2.65298e-05	0.15635	206.71
GLB1L2	-0.968634	6.86022e-07	2.72648e-05	0.214864	120.043
KLF4	0.805288	7.0163e-07	2.78413e-05	0.176672	156.997
KLHDC7A	-0.70309	7.35967e-07	2.91579e-05	0.153047	222.275
AGBL5	-0.827372	7.40463e-07	2.92901e-05	0.182207	155.246
RAB27B	0.941072	7.42872e-07	2.93394e-05	0.209291	120.919
VPS13A	-0.527826	7.5268e-07	2.96803e-05	0.11248	401.655
PCYT1B	-0.900506	7.66871e-07	3.01927e-05	0.199704	132.959
DNAI7	-0.648601	7.68557e-07	3.0212e-05	0.140547	251.238
IQCA1	-0.650514	7.72543e-07	3.03214e-05	0.141024	249.951
ZNF703	-0.883957	7.81997e-07	3.06448e-05	0.196092	139.694
BHLHE41	0.799933	7.84723e-07	3.0704e-05	0.17629	161.151
DENND6B	-0.793652	7.93738e-07	3.10086e-05	0.17492	173.903
LRRC43	-0.863192	8.08834e-07	3.15495e-05	0.191447	140.769
SMCHD1	0.547958	8.26132e-07	3.21745e-05	0.117562	401.063
SPATA13	-0.745974	8.34778e-07	3.24612e-05	0.163954	191.899
CACHD1	-0.729955	8.40576e-07	3.26363e-05	0.160233	198.862
SORT1	-0.518008	8.61264e-07	3.33882e-05	0.110906	400.402
RAP2B	0.956197	8.68428e-07	3.36143e-05	0.214461	109.214
C1S	0.979237	8.75594e-07	3.38398e-05	0.219939	108.023
TRIM38	0.613037	9.11772e-07	3.51841e-05	0.13331	276.159
ARMH1	-1.01108	9.17806e-07	3.53629e-05	0.227944	102.878
BCO2	-1.06149	9.22018e-07	3.5417e-05	0.239884	93.6559
SPA17	-0.792381	9.21287e-07	3.5417e-05	0.175783	164.755
RPGR	-0.648455	9.25522e-07	3.54976e-05	0.141699	245.893
FANK1	-0.671702	9.65684e-07	3.69257e-05	0.147455	230.357
TTC6	-1.03407	9.77636e-07	3.73262e-05	0.234036	97.7251
RAB3IP	0.627652	1.00382e-06	3.82679e-05	0.137366	255.481
ACACB	-0.804127	1.01095e-06	3.84817e-05	0.179367	158.407
RASEF	0.573925	1.01479e-06	3.85698e-05	0.124743	323.194
GIGYF1	-0.648972	1.02514e-06	3.89046e-05	0.142513	243.947
KYNU	0.74498	1.04081e-06	3.94398e-05	0.165587	180.326
XPNPEP3	-0.716867	1.05638e-06	3.99698e-05	0.158905	205.024
SAMD15	-0.715641	1.06566e-06	4.02606e-05	0.15862	198.529
DNAI3	-0.617399	1.07368e-06	4.04425e-05	0.135406	276.662
HDAC5	-0.74886	1.07221e-06	4.04425e-05	0.166614	180.729
SH2B1	-0.791773	1.08819e-06	4.0928e-05	0.177033	161.471
UCKL1-AS1	-0.97429	1.0969e-06	4.11942e-05	0.221013	109.645
HBEGF	1.75468	1.10159e-06	4.13089e-05	0.408941	38.6853
CYB561	-0.592458	1.10683e-06	4.14437e-05	0.129655	296.578
CLUAP1	-0.602772	1.10885e-06	4.1458e-05	0.132126	287.868
CFAP221	-0.597861	1.11818e-06	4.17447e-05	0.130967	289.451
USP18	0.909176	1.1287e-06	4.20755e-05	0.205902	119.211
SLC3A2	0.741956	1.13145e-06	4.21156e-05	0.165534	183.973
CRNDE	-0.741662	1.19586e-06	4.44474e-05	0.165761	182.47
E2F8	-0.970181	1.2141e-06	4.50592e-05	0.221162	111.911
SRCIN1	-0.882211	1.2183e-06	4.51488e-05	0.199857	129.592
SYTL3	-0.693378	1.22539e-06	4.53449e-05	0.154346	210.272
OBSL1	-0.842305	1.23479e-06	4.56258e-05	0.190352	142.747
CFAP61	-0.758141	1.24318e-06	4.58687e-05	0.170063	176.106
ESPN	-0.892996	1.25699e-06	4.62431e-05	0.202894	129.023
HS3ST6	-1.48976	1.28002e-06	4.70215e-05	0.346762	50.1667
RAB3B	-1.13408	1.30904e-06	4.80151e-05	0.261702	81.1101
TAP2	1.09563	1.31087e-06	4.80151e-05	0.252936	82.4041
WDR35	-0.663634	1.31645e-06	4.81495e-05	0.147693	228.146
MPV17L	-1.06428	1.34855e-06	4.91813e-05	0.245145	91.8295
DCDC2B	-0.906805	1.36101e-06	4.95318e-05	0.207028	124.604
NLRC3	-0.915056	1.36856e-06	4.96953e-05	0.209122	121.105
LAMB2	-0.5285	1.38799e-06	5.03285e-05	0.115847	402.186
DRC7	-0.571418	1.40276e-06	5.07911e-05	0.126097	314.726
CEP164	-0.662036	1.4243e-06	5.14973e-05	0.14789	228.289
FAM184A	-0.752239	1.46997e-06	5.30723e-05	0.170027	174.179
GBP5	1.11181	1.49754e-06	5.39905e-05	0.258645	78.7655
CASTOR2	-0.743105	1.53671e-06	5.5286e-05	0.168159	178.006
ENSG00000254162	2.57351	1.53785e-06	5.5286e-05	0.605523	21.1104
DHX58	0.855306	1.55659e-06	5.588e-05	0.195955	129.032
NTRK3	2.3173	1.56401e-06	5.60668e-05	0.547107	24.8605
VCAN	-0.863776	1.57251e-06	5.62915e-05	0.197886	134.121
FAM229B	-0.897696	1.60296e-06	5.72896e-05	0.206604	128.674
FBXL20	-0.77845	1.60493e-06	5.72896e-05	0.17716	162.002
HLA-A	0.536388	1.66845e-06	5.94725e-05	0.118741	350.065
LCA5	-0.588831	1.67406e-06	5.95885e-05	0.131304	286.277
SATB1	-0.56991	1.68112e-06	5.97557e-05	0.126768	307.543
TUBB	0.740387	1.69158e-06	6.00428e-05	0.168415	171.967
ENSG00000286190	-1.20315	1.70893e-06	6.05733e-05	0.28243	70.6267
NYNRIN	-0.609106	1.72409e-06	6.1025e-05	0.136395	265.761
PSD3	-0.511253	1.77457e-06	6.26453e-05	0.113009	416.279
SLC27A2	-0.745416	1.77483e-06	6.26453e-05	0.169968	175.306
EFHC2	-0.740636	1.86357e-06	6.56856e-05	0.169135	182.906
IFT81	-0.637986	1.93902e-06	6.82498e-05	0.144276	243.175
PHLPP2	1.06058	1.9585e-06	6.88395e-05	0.249552	91.6924
GABPB1-AS1	-0.768724	2.08572e-06	7.31075e-05	0.177192	164.083
NSUN7	-0.84476	2.10407e-06	7.35053e-05	0.196175	134.668
CAPS2	-0.804191	2.10189e-06	7.35053e-05	0.186063	147.52
ATP2C2	-0.514493	2.10694e-06	7.35053e-05	0.11477	400.376
CSMD2	2.36012	2.1494e-06	7.482e-05	0.566694	22.8019
MOK	-0.623972	2.19982e-06	7.63645e-05	0.141701	247.986
MED25	-0.552713	2.24614e-06	7.78653e-05	0.124371	319.939
P4HTM	-0.681347	2.26247e-06	7.83235e-05	0.156085	204.67
MAPKBP1	-0.739556	2.34018e-06	8.09029e-05	0.17086	175.412
FTO	-0.64922	2.35413e-06	8.12739e-05	0.148406	224.645
KLK10	0.75805	2.42855e-06	8.37285e-05	0.175939	159.075
TTC26	-0.63879	2.44567e-06	8.39746e-05	0.146113	231.107
CD274	1.56733	2.44334e-06	8.39746e-05	0.379957	41.0415
ELFN2	-1.17089	2.4428e-06	8.39746e-05	0.279903	71.5052
SPAG6	-0.556684	2.46408e-06	8.44919e-05	0.12596	344.106
IQUB	-0.63703	2.51501e-06	8.60046e-05	0.145882	233.81
PCNX4	-0.599053	2.5143e-06	8.60046e-05	0.136488	269.034
BTBD9	-0.602285	2.51905e-06	8.60261e-05	0.137257	264.912
GBP2	0.805698	2.52524e-06	8.6121e-05	0.18846	142.318
ZFYVE26	0.608202	2.54814e-06	8.67847e-05	0.138931	285.295
NME9	-0.887055	2.55344e-06	8.68478e-05	0.208909	120.365
SCIN	-0.761572	2.5796e-06	8.76198e-05	0.177362	165.173
TRIB2	0.679926	2.60305e-06	8.82972e-05	0.156908	195.754
PLTP	-0.939598	2.63255e-06	8.91779e-05	0.222618	108.195
LRRC45	-0.752137	2.65783e-06	8.99139e-05	0.175275	171.653
ARMC9	-0.668376	2.6619e-06	8.9931e-05	0.154174	210.504
XDH	1.47945	2.6744e-06	9.01118e-05	0.359862	45.1206
PLEKHG7	-0.611362	2.82318e-06	9.48716e-05	0.14034	253.876
TCTE1	-0.818076	2.88146e-06	9.66186e-05	0.192531	137.937
CEP162	-0.616807	2.96147e-06	9.91229e-05	0.142018	244.085
WDPCP	-0.808533	3.01862e-06	0.000100902	0.190778	142.483
PASK	-0.752547	3.0378e-06	0.000101409	0.176575	163.651
CNGA4	-0.795264	3.1068e-06	0.000103575	0.187669	146.981
PVRIG	-1.13593	3.18414e-06	0.000106013	0.275423	77.1172
FMO2	-0.660564	3.23983e-06	0.000107589	0.153736	213.145
SPINK5	1.52165	3.24e-06	0.000107589	0.374213	41.5923
CFAP99	-0.707859	3.29783e-06	0.000109366	0.165922	182.384
HIVEP1	0.514735	3.3158e-06	0.000109674	0.117363	361.916
KIF3A	-0.590507	3.40806e-06	0.00011243	0.136483	277.771
PRKX	-0.887112	3.47094e-06	0.000114355	0.212358	117.582
BAIAP2-DT	-0.847564	3.56541e-06	0.000117315	0.202553	126.344
SRGAP3-AS2	-0.790197	3.61652e-06	0.000118687	0.18792	148.23
FHOD1	-0.9859	3.61289e-06	0.000118687	0.238399	96.5044
ANKZF1	-0.650053	3.644e-06	0.000119433	0.152067	221.774
SLC22A23	-0.505976	3.68425e-06	0.00012044	0.11579	368.528
PURA	-0.676864	3.73143e-06	0.000121824	0.15909	200.289
CES1	-0.766675	3.74847e-06	0.000122065	0.182257	157.062
FMO5	-1.01131	3.77954e-06	0.000122602	0.245598	89.0289
ENSG00000286952	-1.05575	3.77151e-06	0.000122602	0.257024	84.5101
MDM1	-0.77227	3.87258e-06	0.000125459	0.183965	150.215
CEP83	-0.625487	3.88983e-06	0.000125856	0.146287	233.064
MYB	-0.664097	3.95833e-06	0.000127908	0.156436	212.334
PAIP2B	-1.00323	4.00283e-06	0.000129181	0.244445	92.48
SLC19A2	1.13321	4.0621e-06	0.000130593	0.279336	72.5716
C20orf96	-0.742775	4.06191e-06	0.000130593	0.17676	161.843
RALGPS1	-0.786587	4.14261e-06	0.000133011	0.188342	143.199
ALOX15B	1.6104	4.22753e-06	0.000135566	0.403098	36.4498
KATNAL2	-0.91935	4.24601e-06	0.000135813	0.22325	105.432
SUGP2	-0.578449	4.24571e-06	0.000135813	0.135089	296.485
UBXN11	-0.547154	4.28181e-06	0.000136785	0.127079	305.693
CCDC65	-0.609497	4.29476e-06	0.000137025	0.142952	244.344
STIMATE	-0.683174	4.31142e-06	0.00013721	0.161936	191.698
EEF2K	-0.652669	4.30942e-06	0.00013721	0.154085	219.462
SLC1A1	-0.922818	4.41091e-06	0.000140023	0.224756	104.727
PRR29	-0.718344	4.61162e-06	0.000146027	0.171717	185.161
ZDHHC23	-1.08751	4.62266e-06	0.000146193	0.268435	76.8795
ENSG00000231881	1.89311	4.67274e-06	0.000147592	0.477249	29.3925
LMLN	-0.769297	4.68913e-06	0.000147924	0.185152	153.037
RARRES1	0.753539	4.83185e-06	0.000152236	0.181527	154.347
ASS1	0.521194	4.8559e-06	0.000152803	0.121358	346.249
SLC15A3	1.18976	4.89152e-06	0.000153733	0.296903	60.9273
ENSG00000287189	-0.668296	4.97837e-06	0.000156268	0.159342	199.346
ZNF652	-0.547844	5.0559e-06	0.000158504	0.128331	298.335
ARAP2	0.544768	5.06356e-06	0.000158547	0.127557	295.099
NABP1	1.10091	5.19845e-06	0.000162569	0.27437	70.6745
DNAAF11	-0.561168	5.23001e-06	0.000163152	0.132058	288.794
ITGA6	0.692514	5.27975e-06	0.0001645	0.166226	177.37
MAPRE3	-0.654548	5.35964e-06	0.000166773	0.156414	210.14
ERICH5	-0.896288	5.36593e-06	0.000166773	0.220321	115.551
USP9Y	-0.630547	5.53636e-06	0.000171437	0.150419	219.651
ZDHHC1	-0.756425	5.5573e-06	0.000171875	0.183475	153.663
BNIP3L	-0.739954	5.67884e-06	0.000175419	0.17941	158.228
TNFRSF10A	1.0905	5.70038e-06	0.000175869	0.273185	70.4756
ZDHHC11B	-1.07248	5.72603e-06	0.000176444	0.268262	82.3118
ENSG00000253666	1.79088	5.88089e-06	0.000180775	0.457909	30.9039
CLHC1	-0.812965	5.94514e-06	0.000182527	0.199217	133.619
AIM2	3.59472	5.99658e-06	0.000183883	0.8772	14.5706
UNC119B	-0.550923	6.02573e-06	0.000184553	0.130396	296.773
BTD	-0.828374	6.04414e-06	0.000184892	0.203575	133.064
ENSG00000287167	-1.85353	6.24927e-06	0.000190474	0.474123	31.1672
TSC2	-0.58944	6.24506e-06	0.000190474	0.140614	248.729
MIPEP	-0.769229	6.25983e-06	0.000190566	0.188126	145.125
INTS3	-0.511483	6.36117e-06	0.000193418	0.120549	338.125
PEX6	-0.819975	6.47132e-06	0.00019653	0.202143	126.455
TNS3	-0.562947	6.4799e-06	0.000196554	0.134005	272.205
PIEZO1	0.567946	6.55403e-06	0.000198326	0.135389	259.549
KCNJ6	2.42205	6.58281e-06	0.000198959	0.620616	19.4203
ANKRD66	-1.0863	6.72901e-06	0.000202891	0.274257	73.2876
CFAP58	-0.570581	6.82448e-06	0.000205524	0.136388	273.745
ZNF33A	-0.545011	6.88857e-06	0.000207207	0.129745	292.355
ZNF33B	-0.651172	6.95446e-06	0.00020894	0.157757	199.343
RSPH9	-0.854446	6.9662e-06	0.000209044	0.212337	116.353
DNER	-0.824315	7.14691e-06	0.000214212	0.204599	127.841
ADH7	-0.640334	7.17707e-06	0.000214861	0.155218	212.427
DEGS2	-0.855876	7.26847e-06	0.000217339	0.213249	116.402
LRRN2	2.04949	7.35372e-06	0.000219369	0.531456	24.0143
IQCD	-0.654651	7.40174e-06	0.00022054	0.15927	199.134
THSD7A	1.7928	7.44935e-06	0.000221693	0.466469	29.3373
ADAM28	0.645403	7.458e-06	0.000221693	0.156925	195.368
GLIS3	-0.506942	7.67883e-06	0.000227445	0.120596	336.061
LRRC46	-0.58822	7.69657e-06	0.000227445	0.141949	247.472
DTNA	-0.972346	7.67337e-06	0.000227445	0.245626	92.7013
PHLPP1	-0.642147	7.69333e-06	0.000227445	0.156241	203.533
AGO1	-0.543999	7.72865e-06	0.000228126	0.130361	295.135
SLC22A4	-0.763009	7.78661e-06	0.000229568	0.188948	145.104
LRRC7	2.25863	7.8682e-06	0.000231703	0.586969	21.6267
OSBPL6	-0.548928	8.00245e-06	0.000235048	0.131863	283.106
GEM	3.07325	8.00972e-06	0.000235048	0.7813	15.2245
TFDP2	-0.68562	8.04496e-06	0.000235808	0.168427	186.495
CCDC157	-0.696754	8.07292e-06	0.000236353	0.17145	178.912
ANK2	1.73864	8.1281e-06	0.000237418	0.454018	30.2207
ANKRD18A	-0.81929	8.11912e-06	0.000237418	0.204763	125.825
MTSS1	-0.606779	8.2298e-06	0.000239987	0.147397	230.442
SNX29	-0.574754	8.2351e-06	0.000239987	0.138895	255.936
RBM20	-1.01258	8.5655e-06	0.000248754	0.258289	84.8492
SSBP4	-0.78441	8.60021e-06	0.000249475	0.19593	148.029
MORN3	-0.690486	8.83546e-06	0.000255419	0.170619	177.603
KIF9	-0.689693	9.07193e-06	0.000261713	0.170615	172.675
FOXN3	-0.565328	9.07392e-06	0.000261713	0.137121	260.354
TMSB10	0.630043	9.14511e-06	0.000263465	0.154625	201.372
ENSG00000285492	6.58899	9.1607e-06	0.000263613	2.55648	10.0247
IQANK1	-0.77034	9.28059e-06	0.000266759	0.192908	136.951
DOC2A	-0.967442	9.37022e-06	0.000268633	0.247369	88.3667
KREMEN1	-0.584522	9.37772e-06	0.000268633	0.142531	241.846
ITPR1	0.524843	9.44909e-06	0.00027037	0.126708	299.229
C1R	0.730441	9.5687e-06	0.000273174	0.182437	159.187
TCTN1	-0.660517	9.56281e-06	0.000273174	0.163226	194.442
NFASC	-0.678783	9.6148e-06	0.000274179	0.168344	186.681
BBS9	-0.673205	9.81005e-06	0.000279431	0.166877	180.956
VIM	-0.641745	9.89574e-06	0.000281555	0.158436	197.138
CLBA1	-0.811855	9.95977e-06	0.000283057	0.205262	124.629
BBS2	-0.768521	1.00198e-05	0.000284443	0.193364	139.443
PHTF1	-0.626838	1.00733e-05	0.000285641	0.154554	206.87
NEIL1	-1.14784	1.02802e-05	0.00029118	0.298779	63.4323
PRSS12	-0.575713	1.0331e-05	0.000292291	0.140943	248.118
IFT122	-0.525186	1.03966e-05	0.000293816	0.127492	302.402
DNASE1	-0.923632	1.04738e-05	0.000295009	0.23682	94.7865
LINC00963	-0.631262	1.05892e-05	0.000297927	0.156188	207.651
MDK	0.648687	1.06982e-05	0.000300658	0.161139	185.632
SLC45A4	-0.686514	1.07324e-05	0.000301284	0.171475	170.317
STX2	-0.804808	1.10326e-05	0.000309366	0.204738	135.877
CD164L2	-0.931013	1.10605e-05	0.000309461	0.239758	92.7191
FAM81B	-0.689158	1.10865e-05	0.000309844	0.17251	170.239
RCAN1	1.10802	1.12172e-05	0.00031315	0.289946	63.4493
TLR3	1.04599	1.12447e-05	0.000313572	0.272771	76.1074
ZNF214	-0.714287	1.12611e-05	0.000313682	0.179635	155.603
AK8	-0.876456	1.16157e-05	0.000323202	0.225371	103.577
ENSG00000254092	2.91513	1.16618e-05	0.000324128	0.765036	15.8989
PKP1	0.600247	1.17449e-05	0.000326079	0.148722	224.295
EPB41L2	1.48023	1.18305e-05	0.000328095	0.395968	39.8401
FAM83A	0.581981	1.21226e-05	0.000335825	0.144013	233.055
C8orf34	-0.996118	1.21918e-05	0.000337003	0.259496	80.6847
EML6	-0.917221	1.22239e-05	0.000337521	0.237502	95.6728
MKS1	-0.853254	1.23766e-05	0.000341365	0.219611	108.119
SELENBP1	-0.531469	1.24607e-05	0.000342363	0.130563	300.209
CACNA1D	-0.861129	1.24529e-05	0.000342363	0.221884	106.019
ENSG00000245025	1.53525	1.24671e-05	0.000342363	0.41195	36.9943
ASB14	-1.39582	1.2495e-05	0.000342756	0.371537	45.9262
SNAPC4	-0.604755	1.26851e-05	0.000347593	0.150593	217.07
MDH1B	-0.657088	1.28462e-05	0.000351245	0.165218	185.421
PTPRH	1.19312	1.28391e-05	0.000351245	0.316525	55.839
PPIL6	-0.57022	1.29796e-05	0.000353743	0.141365	251.491
SCN4A	6.46375	1.30996e-05	0.000356628	2.55102	9.4159
FN1	-0.706069	1.32676e-05	0.000360425	0.179122	157.891
UVSSA	-0.686406	1.37193e-05	0.000371895	0.173974	167.049
CEP128	-0.730569	1.40245e-05	0.000379354	0.186629	147.456
TSIX	2.4341	1.40547e-05	0.000379763	0.656736	18.2373
STPG1	-0.84743	1.41301e-05	0.000381392	0.219977	111.462
NHLRC4	-1.15055	1.41602e-05	0.000381796	0.306172	61.8452
COL28A1	-0.836278	1.42234e-05	0.000383091	0.216946	116.692
FAM102A	-0.50167	1.43033e-05	0.000384832	0.123449	321.267
MYH16	1.71293	1.4503e-05	0.000389374	0.466235	29.2347
ENSG00000224271	2.00459	1.44951e-05	0.000389374	0.545214	23.6324
HMGA1	0.639833	1.45674e-05	0.000390688	0.161667	184.679
LY86-AS1	3.00387	1.49808e-05	0.000400923	0.797153	14.665
HCP5	0.676094	1.5061e-05	0.000402216	0.172132	167.69
CFAP73	-0.643448	1.52863e-05	0.000406943	0.163149	188.732
NACC2	-0.582516	1.53754e-05	0.000408451	0.146157	228.712
LAD1	0.89665	1.54395e-05	0.000409723	0.235591	95.5651
NOS1	2.49595	1.55968e-05	0.000413028	0.679357	17.5698
C11orf16	-0.712092	1.56312e-05	0.000413507	0.182699	150.964
DYNC2I2	-0.633932	1.58379e-05	0.000418534	0.160824	193.826
GRAMD2A	-0.971578	1.60098e-05	0.000422634	0.257256	82.4163
CEP89	-0.562151	1.61603e-05	0.000426163	0.140939	245.138
RXRA	-0.501804	1.65153e-05	0.000434615	0.12451	324.748
ATRN	-0.517501	1.6888e-05	0.000443498	0.129001	292.024
CFAP91	-0.784031	1.71948e-05	0.000449583	0.204437	122.925
ZNF474	-0.737659	1.72079e-05	0.000449583	0.191139	139.593
WDR31	-0.755288	1.72592e-05	0.00044997	0.196263	133.122
LINC00205	-0.954644	1.73195e-05	0.000451075	0.253767	83.5907
NAMPT	0.645459	1.73553e-05	0.000451541	0.165098	178.559
ENSG00000246090	-0.917752	1.74874e-05	0.000454511	0.243337	91.4996
CASP1	0.925023	1.77116e-05	0.00045939	0.245987	85.2695
FBXL4	-0.928859	1.78293e-05	0.00046197	0.246865	88.5694
CCDC96	-0.599668	1.78962e-05	0.000463226	0.152367	212.513
CASTOR3	-0.785662	1.84599e-05	0.000476839	0.20588	121.524
ENSG00000278920	3.77361	1.8517e-05	0.000477826	0.975162	12.929
GARS1-DT	-0.739436	1.855e-05	0.000478189	0.192695	145.685
DTX3	-0.835345	1.86184e-05	0.000479462	0.220426	109.818
IRAK1BP1	-1.10458	1.89098e-05	0.000485973	0.299209	66.1535
CNNM3	-0.804431	1.91811e-05	0.000492445	0.211848	116.255
RSRP1	-0.632389	1.9237e-05	0.000493377	0.162312	187.635
SPACA9	-0.60237	1.93586e-05	0.000494987	0.153849	208.383
ADAM12	-0.800422	1.93216e-05	0.000494987	0.210702	117.302
ENSG00000224479	-1.35043	1.9757e-05	0.000504152	0.37069	44.0147
HEATR5A	-0.577054	1.99156e-05	0.000507686	0.146944	227.361
CARF	-1.04521	1.99482e-05	0.000508004	0.282754	70.3324
SMPD3	-0.634401	2.02955e-05	0.000516328	0.163448	185.628
MROH1	-0.626934	2.07771e-05	0.000528048	0.161772	208.566
NUB1	0.529567	2.10939e-05	0.000535561	0.134117	264.948
SMIM35	-1.27493	2.12333e-05	0.000538017	0.350846	48.4336
CFAP77	-0.745933	2.14091e-05	0.000541927	0.19631	136.244
JHY	-0.641495	2.16257e-05	0.000546861	0.166148	179.55
CACNA1C	2.78323	2.17222e-05	0.000548479	0.764716	14.8574
S100A14	0.714189	2.22563e-05	0.00056056	0.187704	145.666
TMEM212	-0.917557	2.2238e-05	0.00056056	0.247214	88.8414
IL32	1.24672	2.24325e-05	0.000564436	0.34509	49.2017
CEP120	-0.683587	2.27152e-05	0.000570979	0.178821	162.276
COQ4	-0.703255	2.28031e-05	0.000572618	0.184714	150.718
PCDH15	2.52611	2.29256e-05	0.000575121	0.704406	16.1904
S100A8	1.08548	2.29859e-05	0.000576064	0.298201	60.9785
BICC1	-0.772865	2.3049e-05	0.000577072	0.205148	122.927
RPSAP47	6.26723	2.30815e-05	0.000577311	2.54699	8.58723
TTC29	-0.618154	2.34622e-05	0.000586253	0.160261	191.483
MYO18B	2.356	2.35259e-05	0.000587264	0.659707	17.4579
APBB1	-1.19466	2.36234e-05	0.000589113	0.330338	55.4338
KIAA0825	-0.790465	2.36583e-05	0.000589403	0.210906	122.27
CRACR2A	-0.719582	2.40764e-05	0.000598635	0.190143	142.481
TSPAN6	-0.632721	2.40733e-05	0.000598635	0.164834	185.792
MYO16	2.35898	2.42461e-05	0.000602262	0.662499	17.533
PACRG	-0.932329	2.43924e-05	0.000605301	0.253218	85.2337
KIF27	-0.509027	2.44532e-05	0.000606213	0.129577	290.008
MECP2	-0.549429	2.45401e-05	0.000607771	0.141032	249.147
ISYNA1	-0.879202	2.49346e-05	0.000616936	0.237756	94.5601
KLHL24	-0.60703	2.5133e-05	0.000621236	0.157738	204.789
TTBK2	-0.546797	2.5376e-05	0.000626628	0.140549	246.449
IVNS1ABP	-0.53954	2.54634e-05	0.000628171	0.138489	262.223
CEL	-1.06319	2.59554e-05	0.000639683	0.293439	65.5102
PLA2R1	-0.781991	2.63531e-05	0.000648851	0.209869	127.621
LINC00174	-1.02016	2.6445e-05	0.000650479	0.281205	74.194
DYNLT4	-1.14088	2.65664e-05	0.000652831	0.317072	56.776
CHL1	-0.501527	2.66486e-05	0.000654212	0.12811	298.267
SPATA6L	-0.887245	2.71206e-05	0.000665107	0.241772	92.8257
CYB561A3	-0.837875	2.71451e-05	0.000665107	0.226916	105.153
TTC21B	-0.505259	2.72129e-05	0.000666121	0.12936	288.666
S1PR3	2.14315	2.73851e-05	0.000669567	0.611857	19.6179
GALNS	-0.689602	2.77233e-05	0.000676646	0.183017	149.46
TMEM231	-0.546321	2.84959e-05	0.000694832	0.141474	245.232
SYTL1	-0.681784	2.88677e-05	0.000702541	0.181202	152.747
GBP1P1	1.46543	2.88432e-05	0.000702541	0.417596	35.0904
NOL4L	-0.763266	2.90776e-05	0.000706967	0.205676	122.022
HHLA2	-0.941206	2.91203e-05	0.000707324	0.2593	81.647
ALDH5A1	-0.720115	3.10976e-05	0.000752454	0.193603	134.834
DCBLD2	-0.660551	3.12939e-05	0.00075648	0.175918	171.316
SPNS2	0.865528	3.13803e-05	0.000757842	0.23797	93.4808
CRYBG2	1.56385	3.17706e-05	0.000765071	0.449965	31.4519
ALDH2	-0.574245	3.28647e-05	0.00078991	0.150915	216.332
CYP27A1	-0.980768	3.3089e-05	0.000794544	0.273643	73.3859
APOBEC4	-0.867826	3.33012e-05	0.00079888	0.239313	99.052
LRRC36	-1.06778	3.37615e-05	0.000808387	0.300571	62.0358
SPPL2B	-0.73264	3.4032e-05	0.000814091	0.198559	130.005
TRERF1	-0.679785	3.43324e-05	0.0008205	0.182785	152.015
IQSEC2	-0.777918	3.44392e-05	0.000822272	0.212569	115.726
ENSG00000226025	3.28628	3.46148e-05	0.000825683	0.915556	12.5759
DPY19L2P2	-0.889223	3.49262e-05	0.00083154	0.24669	87.6704
SVEP1	-0.842008	3.53971e-05	0.000840543	0.232546	97.3114
DNAH17	1.73965	3.54043e-05	0.000840543	0.508423	27.1355
ERICH6B	6.10672	3.60145e-05	0.000852634	2.54548	7.95966
RELB	0.858305	3.60149e-05	0.000852634	0.23826	92.8531
ZBTB18	-0.7286	3.60805e-05	0.000853386	0.198202	129.248
AHSA2P	-0.669279	3.65384e-05	0.000863408	0.180451	155.918
CELSR3	1.60727	3.67459e-05	0.000867498	0.468036	28.4694
TTC16	-0.899538	3.75566e-05	0.000884983	0.25139	87.6384
LIFR	0.611135	3.76832e-05	0.000887138	0.163384	179.477
MRE11	-0.694019	3.84521e-05	0.000903553	0.188508	143.645
PROSER3	-0.828864	3.87823e-05	0.000909619	0.23008	100.014
UNC80	2.04972	3.88703e-05	0.000910836	0.602327	19.8972
ZMYM3	-0.666946	3.93623e-05	0.000921508	0.180652	156.292
EPC1	0.664531	3.96316e-05	0.000925239	0.180122	153.501
MAILR	-0.799567	3.98892e-05	0.000930392	0.221468	105.719
ANKLE2	0.501999	4.01118e-05	0.000934721	0.131681	272.768
CCDC60	-0.597033	4.03913e-05	0.000940365	0.159808	199.681
IGFBP6	1.29219	4.10662e-05	0.000955195	0.376951	43.6208
MARCHF10	-0.869527	4.14735e-05	0.000963782	0.243751	89.3789
PLXNA4	2.28796	4.23288e-05	0.000982751	0.672666	16.9618
MICAL3	-0.514936	4.30053e-05	0.00099754	0.136069	264.446
ABCA5	-0.521111	4.30996e-05	0.00099881	0.137905	261.39
HSPBP1	-0.559872	4.31467e-05	0.000998984	0.149416	218.028
ERVK13-1	-0.759491	4.33409e-05	0.00100256	0.210455	117.235
GOLGA6L2	2.59115	4.35902e-05	0.0010074	0.756744	15.0545
RABL2B	-0.703641	4.37022e-05	0.00100907	0.193274	135.501
NEB	0.875143	4.38736e-05	0.0010121	0.247056	85.4905
GNAZ	-1.05927	4.46802e-05	0.00102883	0.304558	61.8295
DNAAF3	-0.739417	4.48142e-05	0.00103097	0.204627	122.087
ZNF487	-0.913961	4.48782e-05	0.0010315	0.259177	82.0374
KDR	0.927475	4.50138e-05	0.00103274	0.263869	81.4214
HLA-DOA	-0.675981	4.49841e-05	0.00103274	0.185182	148.208
KLHL36	-0.663396	4.53337e-05	0.00103725	0.181414	157.932
C2CD2L	-0.683855	4.54357e-05	0.00103864	0.187697	143.245
BCL2	1.15346	4.55094e-05	0.00103938	0.3356	50.2105
ULK2	-0.813165	4.64498e-05	0.0010599	0.228334	101.819
TMEM245	-0.546777	4.67014e-05	0.00106468	0.14628	227.398
ZC3H6	-0.55581	4.67858e-05	0.00106542	0.148997	225.974
ENSG00000248538	2.82023	4.68815e-05	0.00106542	0.825577	13.6938
CMTR1	0.564732	4.78856e-05	0.00108592	0.152054	211.724
PIEZO2	1.76769	4.82574e-05	0.00109324	0.529316	24.3159
MICAL1	-0.7543	4.95991e-05	0.00112162	0.210934	116.211
CPA4	1.49715	4.96923e-05	0.00112273	0.446322	30.5503
PCSK4	-1.42538	4.97872e-05	0.00112386	0.421637	36.0808
DNAJC4	-1.23786	5.03334e-05	0.00113518	0.36494	49.3854
IGFN1	2.41474	5.04355e-05	0.00113545	0.719	15.3618
SERPING1	0.699626	5.07716e-05	0.001142	0.194235	131.43
LIPG	1.68343	5.11187e-05	0.00114878	0.505659	26.0895
PBX1	-0.60497	5.14917e-05	0.00115614	0.165027	182.855
FCGBP	-0.523803	5.20924e-05	0.00116858	0.140498	260.048
EFCAB2	-0.735605	5.26222e-05	0.00117837	0.205976	121.817
GAS8	-0.53382	5.27791e-05	0.00118084	0.1436	237.306
CIRBP	-0.528555	5.32657e-05	0.00118914	0.142189	255.306
LYPD3	1.66442	5.32914e-05	0.00118914	0.500573	25.6114
TNFRSF12A	0.831636	5.34535e-05	0.0011917	0.236953	90.494
SPTSSB	1.9584	5.35129e-05	0.00119197	0.590487	19.9816
TUBB6	0.939346	5.36417e-05	0.00119379	0.271704	73.3467
NTRK2	2.00993	5.40627e-05	0.00120104	0.607441	19.5082
SMIM5	-0.737824	5.41214e-05	0.00120129	0.207148	118.997
RCAN3	-0.508	5.41864e-05	0.00120167	0.136095	266.562
MYEF2	-0.657535	5.44331e-05	0.00120608	0.181907	152.523
SYBU	-0.636041	5.47534e-05	0.00121212	0.175375	165.574
IKZF3	2.24725	5.49998e-05	0.0012165	0.676787	16.7114
ENDOD1	0.780675	5.50866e-05	0.00121735	0.221287	108.348
CDKN2B-AS1	-0.783941	5.53022e-05	0.00122105	0.222205	105.786
NHS	-0.704316	5.60628e-05	0.00123568	0.197017	130.841
CXXC4	-1.18709	5.76425e-05	0.00126939	0.35172	48.5004
PATL1	0.568381	5.80886e-05	0.00127477	0.155194	201.889
USP36	0.592743	5.80011e-05	0.00127477	0.162686	181.228
WDR13	-0.577912	5.79379e-05	0.00127477	0.158029	195.495
CCDC74B	-0.881282	5.85619e-05	0.00128404	0.254213	82.6627
CRIP2	-0.732826	5.94936e-05	0.0013022	0.207059	118.805
AMPD3	-0.521663	5.95785e-05	0.00130293	0.141119	247.206
GOLGA8B	-1.34856	5.98791e-05	0.00130837	0.405186	42.3975
ANKUB1	-0.604961	6.18155e-05	0.00134951	0.167167	177.607
IQGAP2	-0.576581	6.28879e-05	0.00137174	0.158568	197.786
SERPINB9	1.67579	6.30407e-05	0.00137388	0.511963	24.9112
LZTFL1	-0.547439	6.3221e-05	0.0013758	0.149638	218.367
ENSG00000259341	2.04288	6.32379e-05	0.0013758	0.626408	18.7517
UBL3	-0.564419	6.3471e-05	0.00137969	0.154896	204.36
DNHD1	-0.577054	6.36906e-05	0.00138327	0.158871	193.294
MXD4	-0.657534	6.40345e-05	0.00138835	0.184215	153.909
ENSG00000181123	-1.0864	6.40214e-05	0.00138835	0.322706	55.6404
PRKAR2A	-0.501329	6.42163e-05	0.0013911	0.135768	279.869
OIP5-AS1	-0.517166	6.46221e-05	0.00139869	0.140594	248.036
ENSG00000226026	-0.911248	6.49766e-05	0.00140395	0.265965	77.7754
HDX	1.53255	6.52603e-05	0.00140887	0.468359	29.369
ENSG00000231057	-1.20747	6.60225e-05	0.00142411	0.362507	45.2463
ANKRD42	-0.501492	6.67842e-05	0.00143931	0.136151	273.508
DENND11	-0.576338	6.70858e-05	0.00144458	0.159173	203.657
TRIM17	-1.28156	6.71924e-05	0.00144564	0.386892	40.8253
CRABP2	0.798821	6.77006e-05	0.00145286	0.230595	96.0361
PRDM1	0.931524	6.75954e-05	0.00145286	0.27409	70.2353
CA12	0.826145	6.76795e-05	0.00145286	0.239555	88.8379
CCDC168	2.029	6.83062e-05	0.00146461	0.624422	18.3793
ENSG00000253284	-0.991916	6.87179e-05	0.00147218	0.293994	69.0137
DNAAF6	-1.10016	6.89709e-05	0.00147635	0.329083	53.146
FAM124A	2.20995	6.90651e-05	0.00147711	0.679283	16.3976
CFAP300	-0.665074	6.94972e-05	0.0014851	0.187782	145.458
PLEKHN1	1.68739	7.20326e-05	0.00153667	0.521601	24.0725
MAK	-0.677764	7.23301e-05	0.00154172	0.192348	141.511
ENSG00000258752	-0.833696	7.34983e-05	0.0015653	0.243422	92.2824
ADGRA3	-0.83347	7.37276e-05	0.00156865	0.243228	91.1972
ENSG00000249738	2.50222	7.38199e-05	0.00156865	0.771658	14.75
BCL7A	-0.681505	7.38424e-05	0.00156865	0.193869	140.295
KCNJ16	-0.91456	7.4783e-05	0.0015873	0.270169	75.4218
ENSG00000280011	2.20029	7.5239e-05	0.0015943	0.681597	16.3037
STOX1	-0.5482	7.58607e-05	0.00160478	0.151932	219.073
TCHH	1.23144	7.61806e-05	0.00161019	0.376557	40.4076
DMPK	-0.947384	7.68803e-05	0.00162362	0.28184	70.9263
ENSG00000286288	3.1453	7.74881e-05	0.00163372	0.938912	11.6463
GPR135	-1.18863	7.95277e-05	0.00167393	0.362346	45.818
ENSG00000286040	5.8255	7.96299e-05	0.00167468	2.55703	7.05586
LINC02604	-1.11534	8.01935e-05	0.00168513	0.338514	50.8181
CLDN1	0.514853	8.07377e-05	0.00169313	0.142087	238.878
AGPAT4	-0.632695	8.07752e-05	0.00169313	0.179413	154.059
[truncated: 1,757 more rows]

## Sheet: Infected_vs_NonInfected_HBEday7
gene	log2FoldChange	pvalue	padj	lfcSE	baseMean
[truncated: 1,465 more rows]
