# Supplementary material for: Global loss of cellular m6A RNA methylation following infection with different SARS-CoV-2 variants
Source: bioRxiv preprint, doi:10.1101/2022.12.08.519593, version 1 (2022-12-09)
Supplement: Supplemental Data S2 [file 519593_file05.xlsx]

## Sheet: BP_DEGs_B.1
ID	Description	GeneRatio	BgRatio	pvalue	p.adjust	qvalue	geneID	Count
GO:0000184	nuclear-transcribed mRNA catabolic process, nonsense-mediated decay	71/2886	120/18862	3.18538e-28	1.9692e-24	1.58766e-24	RPL36A/RPL9/RPL4/RPLP1/RPS29/RPS14/ETF1/PPP2CA/RPL32/RPL14/EXOSC10/RPL11/RPS8/RPL5/RPS27/CTIF/RPL17/RPS18/RPS10/RPL10A/EIF4A3/RPL23/RPL19/RPL27/RPL38/RPL26/RPL15/EIF4G1/RPSA/RPS7/RPS27A/RPL31/PNLDC1/RPS12/RPS6/RPL35/RPL12/RPLP0/RPL6/DCP1B/RPL37A/RPS24/RPL8/PABPC1/RPL7/RPS20/PPP2R2A/RPS5/RPL28/RPS9/RPS11/RPL13A/RPS19/RPS16/UBA52/RPL18A/RPL36/RPS15/RPL13/SMG1/PARN/RNPS1/RPS2/RPS23/RPL37/RPL21/RPS21…	71
GO:0000956	nuclear-transcribed mRNA catabolic process	89/2886	208/18862	1.26022e-21	3.89533e-18	3.14059e-18	RPL36A/RPL9/RPL4/RPLP1/WDR61/BTG2/SAMD4A/RPS29/RPS14/ETF1/PPP2CA/RPL32/RPL14/CNOT4/EXOSC10/RPL11/AGO1/ZC3H12A/RPS8/RPL5/RPS27/TNRC6B/EIF4ENIF1/CTIF/RPL17/RPS18/RPS10/RPL10A/EIF4A3/RPL23/RPL19/RPL27/DDX5/RPL38/RPL26/RPL15/EIF4G1/RPSA/RPS7/RPS27A/RPL31/PNLDC1/RPS12/RPS6/RPL35/RPL12/RPLP0/RPL6/DCP1B/DIS3L2/RPL37A/NANOS1/RPS24/RPL8/AGO2/PABPC1/RPL7/RPS20/PPP2R2A/EXOSC9/RPS5/RPL28/RPS9/RPS11/RPL13A/RP…	89
GO:0006614	SRP-dependent cotranslational protein targeting to membrane	58/2886	105/18862	3.05855e-21	6.30265e-18	5.08148e-18	RPL36A/RPL9/RPL4/RPLP1/RPS29/RPS14/RPL32/RPL14/RPL11/RPS8/RPL5/RPS27/RPL17/RPS18/RPS10/RPL10A/TRAM2/RPL23/RPL19/RPL27/RPL38/RPL26/RPL15/RPSA/RPS7/RPS27A/RPL31/RPS12/RPS6/RPL35/RPL12/RPLP0/RPL6/RPL37A/RPS24/RPL8/RPL7/RPS20/RPS5/RPL28/RPS9/RPS11/RPL13A/RPS19/RPS16/UBA52/RPL18A/RPL36/RPS15/RPL13/RPS2/RPS23/RPL37/RPL21/RPS21/RPS3/RPL27A/RPLP2	58
GO:0006413	translational initiation	84/2886	193/18862	4.56102e-21	7.04905e-18	5.68327e-18	RPL36A/DDX3X/RPL9/RPL4/RPLP1/PPP1R15B/EIF5/EIF2S1/RPS29/NPM1/RPS14/RPL32/RPL14/RPL11/RPS8/RPL5/RPS27/ATF4/EIF3D/CTIF/RPL17/RPS18/RPS10/RPL10A/RPL23/RPL19/RPL27/RPL38/RPL26/EIF4A1/EIF4A2/RPL15/EIF2B5/EIF4G1/RPSA/RPS7/RPS27A/EIF2AK3/RPL31/RPS12/HABP4/RPS6/RPL35/RPL12/EIF2B1/RPLP0/RPL6/EIF4B/EIF4E2/RPL37A/EIF3A/EIF4EBP2/RPS24/RPL8/AGO2/EIF3H/PABPC1/RPL7/RPS20/ABCE1/RPS5/RPL28/RPS9/RPS11/RPL13A/RPS19…	84
GO:0070972	protein localization to endoplasmic reticulum	72/2886	152/18862	7.75342e-21	9.58633e-18	7.72894e-18	RPL36A/RPL9/RPL4/RPLP1/SEC16B/RAB3GAP2/RPS29/RPS14/RPL32/RPL14/INSIG1/RPL11/RPS8/ANKRD13C/RPL5/RPS27/VAPA/RPL17/RPS18/RPS10/RPL10A/TRAM2/RPL23/RPL19/RPL27/RPL38/RPL26/RPL15/RPSA/RPS7/RPS27A/RPL31/MAN1A1/GJA1/RPS12/RPS6/RPL35/HSPA5/RPL12/RPLP0/RPL6/OS9/LRRK2/RPL37A/GBF1/RPS24/RPL8/RPL7/RPS20/ANK2/RPS5/RPL28/RPS9/RPS11/RPL13A/GRIK5/RPS19/RPS16/UBA52/RPL18A/RPL36/RPS15/RPL13/RPS2/RPS23/RPL37/RPL21/R…	72
GO:0006613	cotranslational protein targeting to membrane	58/2886	110/18862	6.47391e-20	6.67028e-17	5.37789e-17	RPL36A/RPL9/RPL4/RPLP1/RPS29/RPS14/RPL32/RPL14/RPL11/RPS8/RPL5/RPS27/RPL17/RPS18/RPS10/RPL10A/TRAM2/RPL23/RPL19/RPL27/RPL38/RPL26/RPL15/RPSA/RPS7/RPS27A/RPL31/RPS12/RPS6/RPL35/RPL12/RPLP0/RPL6/RPL37A/RPS24/RPL8/RPL7/RPS20/RPS5/RPL28/RPS9/RPS11/RPL13A/RPS19/RPS16/UBA52/RPL18A/RPL36/RPS15/RPL13/RPS2/RPS23/RPL37/RPL21/RPS21/RPS3/RPL27A/RPLP2	58
GO:0045047	protein targeting to ER	61/2886	120/18862	8.14022e-20	7.18898e-17	5.79608e-17	RPL36A/RPL9/RPL4/RPLP1/RPS29/RPS14/RPL32/RPL14/RPL11/RPS8/RPL5/RPS27/RPL17/RPS18/RPS10/RPL10A/TRAM2/RPL23/RPL19/RPL27/RPL38/RPL26/RPL15/RPSA/RPS7/RPS27A/RPL31/MAN1A1/RPS12/RPS6/RPL35/HSPA5/RPL12/RPLP0/RPL6/RPL37A/RPS24/RPL8/RPL7/RPS20/RPS5/RPL28/RPS9/RPS11/RPL13A/RPS19/RPS16/UBA52/RPL18A/RPL36/RPS15/RPL13/RPS2/RPS23/RPL37/RPL21/RPS21/RPS3/SPCS2/RPL27A/RPLP2	61
GO:0072599	establishment of protein localization to endoplasmic reticulum	62/2886	124/18862	1.21122e-19	9.35967e-17	7.54619e-17	RPL36A/RPL9/RPL4/RPLP1/RAB3GAP2/RPS29/RPS14/RPL32/RPL14/RPL11/RPS8/RPL5/RPS27/RPL17/RPS18/RPS10/RPL10A/TRAM2/RPL23/RPL19/RPL27/RPL38/RPL26/RPL15/RPSA/RPS7/RPS27A/RPL31/MAN1A1/RPS12/RPS6/RPL35/HSPA5/RPL12/RPLP0/RPL6/RPL37A/RPS24/RPL8/RPL7/RPS20/RPS5/RPL28/RPS9/RPS11/RPL13A/RPS19/RPS16/UBA52/RPL18A/RPL36/RPS15/RPL13/RPS2/RPS23/RPL37/RPL21/RPS21/RPS3/SPCS2/RPL27A/RPLP2	62
GO:0006612	protein targeting to membrane	86/2886	211/18862	2.69901e-19	1.85392e-16	1.49471e-16	RPL36A/FIS1/VPS37D/RPL9/RPL4/RPLP1/CEMIP/ADORA1/RPS29/RPS14/ATG3/RPL32/RPL14/EXOC4/NACAD/RPL11/RPS8/RPL5/PDZK1/RPS27/PEX19/RPL17/RPS18/RPS10/RPL10A/TRAM2/RPL23/RPL19/ERBB2/RPL27/RPL38/CDK5R1/MIEF2/RPL26/RTP2/RPL15/RPSA/RPS7/RPS27A/RPL31/FYN/RPS12/SLC1A1/ZDHHC21/RPS6/RPL35/HSPA5/RPL12/RPLP0/RPL6/C2CD5/RPL37A/ZDHHC6/ANK3/RPS24/PARD3/RPL8/RPL7/RPS20/DMTN/RPS5/RPL28/RPS9/RPS11/RPL13A/RPS19/AKT2/RPS16…	86
GO:0006402	mRNA catabolic process	125/2886	375/18862	1.37327e-18	8.48956e-16	6.84467e-16	RPL36A/HNRNPC/RPL9/RPL4/RPLP1/WDR61/RNASEL/DHX9/BTG2/SAMD4A/RPS29/PSME1/NPM1/RPS14/ETF1/PPP2CA/NUDT12/RPL32/PSMD6/RPL14/CNOT4/EXOSC10/RPL11/PUM1/AGO4/AGO1/ZC3H12A/YBX1/RPS8/RPL5/RPS27/CSDC2/TNRC6B/EIF4ENIF1/CTIF/RPL17/HSPA1A/HSPA1B/RPS18/RPS10/RPL10A/EIF4A3/RPL23/RPL19/PSMD3/RPL27/PSMC5/DDX5/AXIN2/RPL38/UBB/RPL26/TNFSF13/RPL15/FXR1/PSMD2/EIF4G1/RPSA/RPS7/PUM2/RPS27A/XPO1/RPL31/PNLDC1/RPS12/RPS6/R…	125
GO:0090150	establishment of protein localization to membrane	118/2886	354/18862	1.28088e-17	7.19856e-15	5.80381e-15	RPL36A/GRIPAP1/FIS1/VPS37D/RPL9/BMF/RPL4/RPLP1/CEMIP/CNST/ADORA1/RAB3GAP2/TP53BP2/AMN/HSP90AA1/RPS29/EMC9/RPS14/HSPA4/ATG3/RPL32/RPL14/EXOC4/NACAD/TP73/RSC1A1/RPL11/MACF1/RPS8/RPL5/PDZK1/RPS27/PEX19/NPC1/RPL17/PMAIP1/BCL2/RPS18/RPS10/RPL10A/TRAM2/RPL23/RPL19/ERBB2/RPL27/RPL38/CDK5R1/MIEF2/RPL26/RTP2/RPL15/TFDP2/RPSA/RPS7/PKDCC/SPTBN1/RPS27A/BCL2L11/RPL31/CD24/FYN/RPS12/SLC1A1/ZDHHC21/RPS6/RPL35/H…	118
GO:0006401	RNA catabolic process	129/2886	414/18862	1.84195e-16	8.75919e-14	7.06206e-14	RPL36A/HNRNPC/ISG20/RPL9/RPL4/RPLP1/WDR61/RNASEL/DHX9/BTG2/NRDE2/SAMD4A/RPS29/PSME1/NPM1/RPS14/ETF1/PPP2CA/NUDT12/RPL32/PSMD6/RPL14/CNOT4/EXOSC10/RPL11/PUM1/AGO4/AGO1/ZC3H12A/YBX1/RPS8/RPL5/RPS27/CSDC2/TNRC6B/EIF4ENIF1/CTIF/RPL17/HSPA1A/HSPA1B/RPS18/RPS10/RPL10A/EIF4A3/RPL23/RPL19/PSMD3/RPL27/PSMC5/DDX5/AXIN2/RPL38/UBB/RPL26/TNFSF13/RPL15/FXR1/PSMD2/EIF4G1/RPSA/RPS7/PUM2/RPS27A/XPO1/RPL31/PNLDC1/…	129
GO:0006605	protein targeting	131/2886	441/18862	6.91634e-15	2.85045e-12	2.29817e-12	RPL36A/USP9X/SMURF1/FIS1/VPS37D/RPL9/SLC27A2/RPL4/RPLP1/CEMIP/ADORA1/HSP90AA1/RPS29/RPS14/HSPA4/ATG3/RPL32/ACOX2/RPL14/EXOC4/CROT/PEX1/NACAD/UBE2J2/PEX10/PEX14/RPL11/HMGCL/RPS8/RPL5/HAO2/PDZK1/RPS27/PEX19/SYNGR1/RPL17/ECI2/HSPA1L/RPS18/RPS10/RPL10A/PEX6/TRAM2/USP36/RPL23/RPL19/ERBB2/RPL27/GOSR2/RPL38/STXBP4/CDK5R1/MIEF2/UBB/RPL26/RTP2/RPL15/NLGN1/PARL/RPSA/RPS7/RPS27A/RPL31/FYN/MAN1A1/RPS12/SLC1A…	131
GO:0072331	signal transduction by p53 class mediator	79/2886	263/18862	9.01164e-10	3.48187e-07	2.80725e-07	RPS6KA6/AEN/MSX1/BTG2/DYRK3/TP53BP2/BDKRB2/CDC25C/HINT1/BRPF1/PAXIP1/PRKAG2/TRIM24/CNOT4/HUS1/TP73/CHD5/RPL11/PLK3/GADD45A/RPL5/MUC1/IFI16/MAPK11/RBBP8/TAF4B/PMAIP1/BCL2/PAK1IP1/RPL23/DDX5/PDK2/BRIP1/PPM1D/CDK5R1/UBB/RPL26/AURKB/TFDP2/RPS7/SPRED2/HDAC2/HNRNPK/ACER2/TOPORS/ING4/CHD4/NOP2/FOXM1/PLA2R1/TAF5/ANKRD1/CDK1/SIRT1/DDIT4/TAF3/NDRG1/TP53INP1/RRS1/KAT6A/ING2/BCL3/ARID3A/CNOT1/RBL2/CCNB1/PLK2…	79
GO:0002181	cytoplasmic translation	41/2886	102/18862	1.00069e-09	3.63899e-07	2.93392e-07	RPL36A/CPEB2/RPL9/RPLP1/PKM/DHX9/EIF5/RPS29/CPEB4/ETF1/RPL32/RPL11/EIF3D/RPL17/RPL10A/RPL19/RPL38/RPL26/EIF4A1/EIF4A2/RPL15/RPL22L1/EIF4G1/RPSA/RPL31/RWDD1/RPLP0/RPL6/EIF4B/ZC3H15/EIF3A/RPL8/EIF3H/RPL13A/EIF3K/RPL18A/RPL36/EEF2/RPS23/RPS21/RPLP2	41
GO:0140014	mitotic nuclear division	83/2886	296/18862	1.22577e-08	3.78886e-06	3.05475e-06	KIF4A/PRC1/NCAPG/KIF23/CCSAP/NEK2/CENPF/VRK1/REC8/DUSP1/CDC25C/CDC23/PPP2CA/SPICE1/RHOA/NCAPG2/ANLN/PHF13/CDC20/KIF2C/CDC14A/LMNA/RANBP1/KLHL22/HSPA1A/HSPA1B/CUL7/CHMP6/CDC6/TUBG1/CDC27/SPHK1/SPAG5/TOM1L2/AURKB/CLASP2/SMC4/BUB1/NCAPH/TTK/PHIP/RAN/KNTC1/RACGAP1/DIS3L2/CUL3/OBSL1/PPP2R2D/MKI67/KIF20B/CDK1/KIFC2/RAD21/RRS1/UBXN2B/PPP2R2A/CENPE/EREG/CHMP2A/UBE2S/CCDC8/CCDC61/SIRT2/INSR/DAPK3/SMPD3/KI…	83
GO:0051090	regulation of DNA-binding transcription factor activity	113/2886	444/18862	1.40033e-08	4.1223e-06	3.32358e-06	MBTPS2/BUD31/ADAM8/AGT/TNFSF4/DHX9/TRAF3/ESR2/NFKBIA/TRIM52/TRIM41/NPM1/PPARG/IRAK2/BHLHE40/WNT5A/PAXIP1/EZH2/SMO/FZD1/IL6/PEX14/ZC3H12A/HEYL/FAF1/JUN/BCL10/RWDD3/DDR2/MAPK11/TAB1/HMOX1/TNFRSF11A/RIPK1/TRIM38/TRIM27/TRIM26/HSPA1A/HSPA1B/PIM1/VEGFA/NFKBIE/PKHD1/CARD14/JUP/HDAC5/FZD2/FOXJ1/SPHK1/TRIM25/LGALS9/UBB/HES1/IL1RAP/ALK/RPS27A/PELI1/IL18RAP/UFL1/HDAC2/SGK1/TNFAIP3/PTCH1/KLF4/TRIM32/TRAF1/U…	113
GO:0031331	positive regulation of cellular catabolic process	100/2886	384/18862	2.77145e-08	6.85325e-06	5.52541e-06	ABCD1/UBQLN2/DHRSX/SMURF1/ADAM8/SNX33/BTG2/RAB3GAP2/HSP90AA1/SPTLC2/ENTPD5/HIF1A/DACT1/CSNK1A1/ADRB2/DTX3L/VGLL4/PFKFB4/FYCO1/ABHD5/IL6/PUM1/RNF19B/ZC3H12A/CDC20/PLK3/FAF1/TMEM59/GBA/TNRC6B/HMOX1/EIF4ENIF1/RNF185/TRIM38/TRIM27/HSPA1A/HSPA1B/OSBPL7/PIP4K2B/TRIB2/SOCS5/BCL2L11/UFL1/FOXO3/TNFAIP3/SPTLC1/TSC1/ABCA2/CHFR/ULK1/CAMKK2/HSPB8/TPCN1/LRP1/GPD1/LRRK2/SH3BP4/GIGYF2/LRP2/BAG3/NANOS1/SIRT1/SUPV…	100
GO:0060271	cilium assembly	100/2886	388/18862	4.84002e-08	1.03176e-05	8.31851e-06	HDAC6/HAUS4/CC2D2A/EHD4/BBS4/CEP350/NEK2/HSP90AA1/DYNC1H1/TTC8/TXNDC15/ARL13B/ATG3/IFT122/TTLL3/ZMYND10/GALNT11/TTC26/LRGUK/CEP41/IQUB/PRKAR2B/CROCC/KIF17/CDC14A/CELSR2/RABL2B/IFT27/CEP76/TTC39C/ONECUT2/DCDC2/ATAT1/TUBB/PKHD1/CCDC57/CCDC40/DNAH17/TUBG1/CCDC103/FBF1/FOXJ1/DYNLL2/MKS1/RILP/IQCG/CEP19/DZIP1L/CEP70/IFT80/CCDC39/KIF3C/DRC1/IFT172/ARMC2/AHI1/KIF27/SSNA1/TCTN2/UNC119B/TCTN1/TCHP/CEP290/…	100
GO:0044782	cilium organization	103/2886	409/18862	1.06764e-07	1.88575e-05	1.52038e-05	HDAC6/HAUS4/CC2D2A/EHD4/BBS4/CEP350/NEK2/HSP90AA1/DYNC1H1/TTC8/FAM161B/TXNDC15/ARL13B/ATG3/IFT122/TTLL3/ZMYND10/GALNT11/TTC26/LRGUK/CEP41/IQUB/PRKAR2B/CROCC/KIF17/CDC14A/CELSR2/RABL2B/IFT27/CEP76/TTC39C/ONECUT2/RTTN/DCDC2/ATAT1/TUBB/PKHD1/CCDC57/CCDC40/DNAH17/TUBG1/CCDC103/FBF1/FOXJ1/DYNLL2/MKS1/RILP/IQCG/CEP19/DZIP1L/CEP70/IFT80/CCDC39/KIF3C/DRC1/IFT172/ARMC2/AHI1/KIF27/SSNA1/TCTN2/UNC119B/TCTN1…	103
GO:0071900	regulation of protein serine/threonine kinase activity	119/2886	492/18862	1.22034e-07	2.03896e-05	1.64391e-05	DUSP9/DDX3X/NR2F2/PRKAR1B/ADAM8/THBS1/CEMIP/AGT/RGS2/ATP2B4/DUSP10/TGFB3/CDKN3/FERMT2/DUSP1/FGF18/ADRB2/SPRY4/CDC25C/PPP2CA/IRAK2/WNT5A/MST1/RHOA/PRKAG2/EZH2/PRKAR2B/DBF4/CCNL2/TP73/EPHB2/MAP3K6/CDKN2C/GADD45A/GBA/PEA15/MAPK11/TAB1/DUSP18/TNFRSF11A/RIPK1/DAXX/STK38/VEGFA/HSP90AB1/ERBB2/CDC6/HEXIM2/STRADA/CD300A/DUSP14/CDK5R1/MAP2K3/UBB/NEK10/CCNL1/TRIB2/SPDYA/ALK/RPS27A/SPRED2/CD24/TNFAIP3/ROR2/D…	119
GO:0071897	DNA biosynthetic process	58/2886	194/18862	1.78323e-07	2.90103e-05	2.33894e-05	HNRNPC/TEP1/SPRTN/NEK2/CENPF/HSP90AA1/FGFR4/DUSP1/LOX/PPARG/HNRNPA2B1/POLM/CCT6A/ISG15/EXOSC10/CCT3/POLI/DDX39B/HSP90AB1/POLG2/SPHK1/TRIM25/UBB/AURKB/RPS27A/CCT4/CCT7/TCP1/REV3L/GJA1/KLF4/UBC/CCT2/PTGES3/XRCC5/POLL/ANKRD1/SIRT1/PARP10/MYC/GAR1/HNRNPD/PARM1/UBA52/CDKN2D/SMPD3/TK2/SH2B1/PARN/CCT5/DACH1/RGCC/PARP4/CCT8/SRC/ATM/POLD3/NAT10	58
GO:0021915	neural tube development	47/2886	145/18862	1.87647e-07	2.97444e-05	2.39813e-05	SALL2/BBS4/GPR161/TGFB2/HIF1A/DACT1/ARL13B/IFT122/WNT5A/SETD2/SMO/SEMA3C/MTHFR/EPHA2/STIL/BCL10/CELSR1/CECR2/BRD2/FZD2/NOG/HES1/DZIP1L/RPS7/IFT172/SEMA4C/MTHFD1L/PTCH1/TSC1/KDM2B/TCTN1/RARG/TULP3/GBX2/LRP2/SUFU/KIF20B/FZD6/STK3/DLC1/INTU/SHROOM3/VASP/RPGRIP1L/PKD1/C2CD3/ADM	47
GO:1903320	regulation of protein modification by small protein conjugation or removal	67/2886	237/18862	2.17275e-07	3.27608e-05	2.64133e-05	HDAC8/DDX3X/ARRDC4/SPRTN/HSP90AA1/HIF1A/SQSTM1/PRR7/EGR1/DTX3L/GNL3/PAXIP1/ISG15/RPL11/ZC3H12A/CDC20/BCL10/RPL5/RWDD3/HSPA1A/HSPA1B/DAXX/HSP90AB1/RPL23/SPHK1/UBB/NXN/RPS7/PRKCE/PELI1/UFL1/FYN/TNFAIP3/TOPORS/DNAJA1/HSPA5/CHFR/SART3/CRY1/LRRK2/PER2/TRIP12/CUL3/TANK/BTRC/BMI1/GTPBP4/PARP10/UBR5/RIPK2/FBXW7/OTUD4/UBE2S/PRKCG/UBA2/PLK1/RPS2/ARRDC3/CDC20B/TRIB3/DCUN1D5/BIRC3/RPS3/CTR9/PRMT3/UBXN1/TOLLIP	67
GO:1901987	regulation of cell cycle phase transition	115/2886	478/18862	2.65936e-07	3.91432e-05	3.1559e-05	FOXO4/DDX3X/HAUS4/PBX1/BTG2/ATP2B4/DYRK3/NEK2/CENPF/HSP90AA1/DYNC1H1/HSPA2/DACT1/PSME1/UIMC1/DUSP1/NPM1/HMMR/CDC25C/CDC23/XPC/PSMD6/HYAL1/PAXIP1/EZH2/CNOT4/CEP41/PRKAR2B/KMT2E/DBF4/ANLN/HUS1/MIIP/CDC20/PLK3/CDKN2C/ORC1/GADD45A/CDC7/CDC14A/MUC1/KLHL22/CEP76/BCL2/TUBB/PSMD3/CDC6/TUBG1/CDC27/PSMC5/STXBP4/RPL26/AURKB/NEK10/CEP70/TFDP2/PSMD2/EIF4G1/CTDSPL/BUB1/TTK/ANXA1/KLF4/ANAPC2/SSNA1/CHFR/KNTC1/AP…	115
GO:0034101	erythrocyte homeostasis	41/2886	121/18862	2.93206e-07	4.21534e-05	3.3986e-05	KLF13/IREB2/DYRK3/HIF1A/RPS14/HSPA9/SMAD5/ALAS1/NCAPG2/KMT2E/INHBA/ISG15/TAL1/ADAR/ANKRD54/HMOX1/PTPN2/TRIM10/HSPA1A/HSPA1B/VEGFA/SMAP1/JMJD6/KAT7/BCL6/SLC25A38/UFL1/FOXO3/RPS6/INPP5D/RPS24/ZNF16/DMTN/HMGB2/RPS19/AXL/ZFP36/ZFPM1/PKNOX1/FAM210B/ETS1	41
GO:0006611	protein export from nucleus	55/2886	183/18862	3.03546e-07	4.26482e-05	3.43849e-05	SMURF1/CPSF4/CTDSPL2/PTPN14/NPM1/HSPA9/SETD2/NUP205/HNRNPA2B1/SRRM1/SRSF11/RANGAP1/NUP153/DDX39B/SRSF3/ALYREF/EIF4A3/STRADA/SRSF1/SUPT6H/EIF5A/CPSF3/SRSF7/XPO1/RANBP2/ANP32B/TXN/TSC1/RAN/DUSP16/STRADB/IWS1/WDR33/BAG3/TCF7L2/EGR2/RRS1/ABCE1/SDAD1/YTHDC1/DDX39A/CALR/RPS15/XPO6/SMG1/RNPS1/PKD1/NUP155/GAS6/XPO4/U2AF1/NXT1/NUP98/NUP160/NXF1	55
GO:0007050	cell cycle arrest	66/2886	235/18862	3.46775e-07	4.66035e-05	3.75739e-05	HMGN5/FOXO4/LAMTOR4/ZBTB49/THBS1/BTG2/TGFB2/VASH1/CDKN3/DUSP1/CDC25C/IRF1/WDR6/PRKAG2/RHEB/CNOT4/KMT2E/INHBA/TP73/SLC25A33/ZBTB17/PLK3/CDKN2C/DHCR24/GADD45A/CDC14A/MUC1/MAPK12/HSP90AB1/RPL23/STRADA/CDK5R1/RNF112/RPL26/TFDP2/IL12A/SKIL/SOX2/PPM1G/GAS1/ZNF268/HMGA2/DDIT3/ING4/FOXM1/STRADB/TCF7L2/KIF20B/CDK1/MYC/TP53INP1/AKT2/CALR/CDKN2D/ARID3A/CNOT1/RBL2/PKD1/CDK7/CCNB1/PLK2/POU4F1/RGCC/E2F1/AURKA/…	66
GO:0060562	epithelial tube morphogenesis	81/2886	309/18862	4.20902e-07	5.42087e-05	4.37055e-05	GPC3/MMP14/SLIT2/DLL4/BBS4/CTSH/AGT/PBX1/KDM5B/TGFB2/HIF1A/SIX4/CASR/IFT122/PLXND1/WNT5A/RHOA/SETD2/SMO/PIK3CD/MTHFR/EPHA2/STIL/BCL10/CSF1/RBM15/WNT2B/CELSR1/CECR2/BCL2/BRD2/VEGFA/PKHD1/CCDC40/TCAP/FZD2/CCDC103/NOG/HES1/CCDC39/RPS7/RHOB/IFT172/PAX8/SEMA4C/MTHFD1L/AHI1/PTCH1/ENG/TSC1/NRARP/KDM2B/TCTN1/CEP290/RARG/TULP3/GBX2/LRP2/TBR1/SUFU/BTRC/KIF20B/FOXH1/MYC/FZD6/STK3/DLC1/SHROOM3/VASP/MEGF8/PKD…	81
GO:0008643	carbohydrate transport	47/2886	149/18862	4.61335e-07	5.59211e-05	4.50861e-05	GPC3/MEF2A/AQP9/RNASEL/SLC45A3/SLC35A4/SLC23A1/SLC35A5/PRKAG2/SLC35B4/RSC1A1/MFSD2A/SLC2A1/SLC5A9/SLC35D1/SLC35A3/PEA15/SLC2A11/SLC25A27/SLC17A5/SLC35B1/STXBP4/SLC2A2/SLC35A1/NR4A3/SLC27A4/TSC1/HNF1A/APPL2/C2CD5/CREBL2/ADIPOR2/CAPN10/VIL1/SORBS1/FABP5/RTN2/AKT2/INSR/C3/SMPD3/OCLN/SLC5A3/TRIB3/SLC23A2/SLC2A10/SLC37A4	47
GO:0030900	forebrain development	90/2886	357/18862	6.35017e-07	7.13759e-05	5.75465e-05	PLXNA3/HPRT1/NR2F2/MSX1/SLIT2/BBS4/SEMA7A/BTG2/ATP2B4/SRGAP2/NUMB/HIF1A/NIN/NDST1/ROBO2/ARL13B/WNT5A/SETD2/EZH2/SMO/FOXP2/LAMB1/INHBA/CHD5/EPHB2/MFSD2A/SLC2A1/STIL/WNT2B/CHRNB2/BCAN/WNT7B/SSTR3/RTN4R/CDH2/ATAT1/EFHC1/EZH1/NOG/CDK5R1/UBB/KDM6B/HES1/SOX2/TRA2B/ALK/NR2E1/FYN/AGTPBP1/TSC1/KDM2B/TCTN1/SCYL2/FRS2/GLI1/LRP1/SLC38A2/LRRK2/GBX2/LRP2/TBR1/NR4A2/EMX2/DPCD/PRKG1/BMPR1A/KIF5B/CHD7/DLC1/SLC7A1…	90
GO:0051168	nuclear export	58/2886	201/18862	6.62087e-07	7.30897e-05	5.89283e-05	SMURF1/CPSF4/CTDSPL2/DHX9/PTPN14/NRDE2/NPM1/HSPA9/SETD2/NUP205/HNRNPA2B1/SRRM1/SRSF11/RANGAP1/EIF4ENIF1/NUP153/DDX39B/SRSF3/ALYREF/EIF4A3/STRADA/SRSF1/SUPT6H/EIF5A/CPSF3/SRSF7/XPO1/RANBP2/ANP32B/TXN/TSC1/RAN/DUSP16/STRADB/IWS1/WDR33/BAG3/TCF7L2/EGR2/RRS1/ABCE1/SDAD1/YTHDC1/DDX39A/CALR/RPS15/XPO6/SMG1/RNPS1/PKD1/NUP155/GAS6/XPO4/U2AF1/NXT1/NUP98/NUP160/NXF1	58
GO:1903311	regulation of mRNA metabolic process	85/2886	334/18862	8.48169e-07	9.04031e-05	7.28871e-05	SRPK3/HNRNPC/CPSF4/PRDX6/RNASEL/DHX9/BTG2/SAMD4A/PSME1/NPM1/PSMD6/SRPK2/TRA2A/HNRNPA2B1/CDK11B/PUM1/ZC3H12A/YBX1/RBMXL1/RBM15/CSDC2/TNRC6B/EIF4ENIF1/HSPA1A/SRSF3/RBFOX3/PSMD3/PSMC5/DDX5/AXIN2/JMJD6/SUPT6H/UBB/TNFSF13/C1QBP/FXR1/PSMD2/EIF4G1/TRA2B/PUM2/SRSF7/RPS27A/XPO1/QKI/WTAP/HNRNPK/SFSWAP/UBC/ZC3H10/GIGYF2/NCL/CWC22/PSMD14/IWS1/NANOS1/VIM/PUF60/AGO2/KHDRBS3/YWHAZ/PABPC1/EXOSC9/HNRNPD/YTHDC1/NO…	85
GO:0007224	smoothened signaling pathway	42/2886	131/18862	1.14198e-06	0.000117662	9.48645e-05	GPC3/EVC/EVC2/CC2D2A/ULK3/GPR161/NDST1/TXNDC15/FBXL17/ARL13B/IFT122/TTC26/SMO/IQUB/STIL/IFT27/DCDC2/HES1/DZIP1L/IFT80/IFT172/PTCH1/ROR2/GAS1/SSNA1/TCTN2/TCTN1/GLI1/DHH/TULP3/ARMC9/STK36/WDR11/SUFU/BTRC/TCTN3/INTU/MEGF8/RPGRIP1L/GLIS2/DZIP1/C2CD3	42
GO:1901796	regulation of signal transduction by p53 class mediator	52/2886	177/18862	1.35781e-06	0.000137606	0.000110944	MSX1/DYRK3/TP53BP2/BDKRB2/BRPF1/PRKAG2/TRIM24/HUS1/TP73/CHD5/RPL11/PLK3/RPL5/MUC1/MAPK11/RBBP8/TAF4B/PMAIP1/BCL2/PAK1IP1/RPL23/DDX5/BRIP1/CDK5R1/UBB/RPL26/AURKB/RPS7/SPRED2/HDAC2/HNRNPK/CHD4/NOP2/PLA2R1/TAF5/ANKRD1/SIRT1/TAF3/TP53INP1/RRS1/KAT6A/ING2/POU4F1/DYRK1A/PHF20/TPX2/L3MBTL1/AURKA/ATM/TAF10/SSRP1/MTA2	52
GO:0000280	nuclear division	104/2886	436/18862	1.49596e-06	0.000146794	0.000118352	KIF4A/CCNB1IP1/PRC1/ZCWPW1/MSX1/NCAPG/KIF23/CCSAP/NEK2/CENPF/VRK1/MLH3/HSPA2/REC8/DUSP1/CDC25C/CDC23/PPP2CA/SPICE1/WNT5A/RHOA/NCAPG2/ANLN/PHF13/AGO4/CDC20/KIF2C/HFM1/CDC14A/LMNA/RANBP1/KLHL22/HSPA1A/HSPA1B/CUL7/CHMP6/CDC6/TOP2A/TUBG1/CDC27/SPHK1/BRIP1/SPAG5/TOM1L2/UBB/AURKB/CLASP2/SMC4/SPDYA/BCL2L11/BUB1/NCAPH/TTK/PHIP/CHFR/RAN/KNTC1/RACGAP1/DIS3L2/CUL3/OBSL1/PPP2R2D/MKI67/KIF20B/CDK1/KIFC2/RAD21…	104
GO:0051960	regulation of nervous system development	101/2886	422/18862	1.79618e-06	0.000169265	0.000136469	PLXNA3/PLXNB3/SRPX2/SEMA4B/SRRT/SLIT2/DLL4/SEMA7A/DUSP10/FLRT2/NUMB/HIF1A/NIN/ROBO2/PLXNA1/PLXND1/PPARG/BHLHE40/WNT5A/SEMA3B/RHOA/PLXNB1/RHEB/EZH2/SMO/SEMA3C/IL6/CAMK2B/AGRN/TP73/SPEN/EPHB2/MACF1/HEYL/NGF/SEMA6C/TYMP/RTN4R/KIAA0319/CUL7/TTBK1/VEGFA/NGFR/NR1D1/WNT3/NOG/CDK5R1/RNF112/HES7/ASPA/HES1/IL1RAP/SKIL/NLGN1/EIF2AK3/SEMA4C/UFL1/NR2E1/HDAC2/TPBG/TRIM32/ANAPC2/RNF10/APPL2/NAP1L1/LRP1/RARG/DIP…	101
GO:2000278	regulation of DNA biosynthetic process	36/2886	107/18862	1.83662e-06	0.000169265	0.000136469	HNRNPC/NEK2/HSP90AA1/FGFR4/DUSP1/PPARG/HNRNPA2B1/CCT6A/EXOSC10/CCT3/DDX39B/HSP90AB1/POLG2/AURKB/CCT4/CCT7/TCP1/GJA1/KLF4/CCT2/PTGES3/XRCC5/ANKRD1/MYC/HNRNPD/PARM1/SH2B1/PARN/CCT5/DACH1/RGCC/PARP4/CCT8/SRC/ATM/NAT10	36
GO:0001843	neural tube closure	30/2886	82/18862	1.83761e-06	0.000169265	0.000136469	BBS4/TGFB2/IFT122/WNT5A/SETD2/MTHFR/STIL/BCL10/CELSR1/CECR2/BRD2/FZD2/NOG/RPS7/IFT172/SEMA4C/MTHFD1L/PTCH1/TSC1/KDM2B/RARG/TULP3/LRP2/SUFU/KIF20B/FZD6/DLC1/SHROOM3/VASP/ADM	30
GO:0010508	positive regulation of autophagy	39/2886	120/18862	1.86186e-06	0.000169265	0.000136469	DHRSX/RAB3GAP2/SPTLC2/HIF1A/ADRB2/FYCO1/ZC3H12A/PLK3/TMEM59/HMOX1/TRIM38/TRIM27/PIP4K2B/BCL2L11/UFL1/FOXO3/SPTLC1/TSC1/ULK1/CAMKK2/HSPB8/TPCN1/LRRK2/SH3BP4/BAG3/SIRT1/WAC/OPTN/MTDH/TP53INP1/RIPK2/BNIP3L/SCOC/PLK2/FOXO1/UVRAG/TRIM68/TRIM6/TRIM5	39
GO:0000082	G1/S transition of mitotic cell cycle	72/2886	275/18862	1.8957e-06	0.000169844	0.000136936	CDK16/DDX3X/MCM7/BTG2/MAX/DACT1/CDKN3/PSME1/CDC25C/HYAL1/EZH2/CNOT4/KMT2E/DBF4/CDK14/INHBA/PLK3/CDKN2C/ORC1/GADD45A/CDC7/MUC1/CDC45/BCL2/E2F3/PRIM2/CDC6/CDK3/RPL26/TFDP2/EIF4G1/CTDSPL/KLF11/SPDYA/ANXA1/RPS6/KLF4/PPP6C/APPL2/CDK17/CUL3/CDK1/MCM10/MYC/MCM4/JADE1/ANKRD17/CCNE1/KANK2/CDKN2D/ARID3A/CDK10/FBXO31/CNOT1/RBL2/PKD1/CDK7/CCNB1/PLK2/SKP2/RGCC/LATS2/PRMT2/E2F1/MCM8/PLCB1/AURKA/ATM/TAF10/WEE1/…	72
GO:0060606	tube closure	30/2886	83/18862	2.45956e-06	0.000208288	0.000167931	BBS4/TGFB2/IFT122/WNT5A/SETD2/MTHFR/STIL/BCL10/CELSR1/CECR2/BRD2/FZD2/NOG/RPS7/IFT172/SEMA4C/MTHFD1L/PTCH1/TSC1/KDM2B/RARG/TULP3/LRP2/SUFU/KIF20B/FZD6/DLC1/SHROOM3/VASP/ADM	30
GO:0050767	regulation of neurogenesis	86/2886	348/18862	2.67137e-06	0.000220133	0.000177482	PLXNA3/PLXNB3/SEMA4B/SRRT/SLIT2/DLL4/SEMA7A/DUSP10/NUMB/HIF1A/NIN/ROBO2/PLXNA1/PLXND1/PPARG/BHLHE40/WNT5A/SEMA3B/RHOA/PLXNB1/RHEB/EZH2/SMO/SEMA3C/IL6/CAMK2B/TP73/SPEN/EPHB2/MACF1/HEYL/NGF/SEMA6C/RTN4R/KIAA0319/CUL7/TTBK1/VEGFA/NGFR/NR1D1/WNT3/NOG/CDK5R1/RNF112/HES7/ASPA/HES1/SKIL/SEMA4C/UFL1/NR2E1/HDAC2/TRIM32/ANAPC2/RNF10/APPL2/NAP1L1/LRP1/DIP2B/BHLHE41/PER2/OBSL1/XRCC5/LRP2/ZFYVE27/EGR2/BMPR1A/…	86
GO:0001841	neural tube formation	33/2886	96/18862	2.85446e-06	0.000229172	0.000184769	BBS4/TGFB2/HIF1A/IFT122/WNT5A/SETD2/MTHFR/STIL/BCL10/CELSR1/CECR2/BRD2/FZD2/NOG/RPS7/IFT172/SEMA4C/MTHFD1L/PTCH1/TSC1/KDM2B/TCTN1/RARG/TULP3/LRP2/SUFU/KIF20B/FZD6/STK3/DLC1/SHROOM3/VASP/ADM	33
GO:0031396	regulation of protein ubiquitination	57/2886	205/18862	2.99396e-06	0.00023729	0.000191314	HDAC8/DDX3X/ARRDC4/SPRTN/HSP90AA1/SQSTM1/PRR7/DTX3L/PAXIP1/ISG15/RPL11/CDC20/BCL10/RPL5/HSPA1A/HSPA1B/DAXX/HSP90AB1/RPL23/SPHK1/UBB/NXN/RPS7/PRKCE/PELI1/UFL1/FYN/TNFAIP3/TOPORS/DNAJA1/HSPA5/CHFR/CRY1/LRRK2/PER2/TRIP12/CUL3/BTRC/BMI1/GTPBP4/PARP10/UBR5/RIPK2/FBXW7/UBE2S/PRKCG/PLK1/RPS2/ARRDC3/CDC20B/TRIB3/DCUN1D5/BIRC3/RPS3/CTR9/PRMT3/UBXN1	57
GO:1901798	positive regulation of signal transduction by p53 class mediator	13/2886	22/18862	3.11627e-06	0.000243381	0.000196225	MSX1/CHD5/RPL11/PMAIP1/RPL23/DDX5/UBB/RPL26/RPS7/SPRED2/PLA2R1/ANKRD1/ATM	13
GO:0014020	primary neural tube formation	31/2886	88/18862	3.14954e-06	0.000243381	0.000196225	BBS4/TGFB2/HIF1A/IFT122/WNT5A/SETD2/MTHFR/STIL/BCL10/CELSR1/CECR2/BRD2/FZD2/NOG/RPS7/IFT172/SEMA4C/MTHFD1L/PTCH1/TSC1/KDM2B/RARG/TULP3/LRP2/SUFU/KIF20B/FZD6/DLC1/SHROOM3/VASP/ADM	31
GO:0006913	nucleocytoplasmic transport	84/2886	340/18862	3.51379e-06	0.000264906	0.000213579	SMURF1/CPSF4/CTDSPL2/DHX9/PTPN14/NRDE2/NFKBIA/NPM1/HSPA9/SETD2/NUP205/SMO/HNRNPA2B1/SRRM1/ZC3H12A/SRSF11/DDX20/TXNIP/RANGAP1/ANKRD54/EIF4ENIF1/NUP153/E2F3/PPP1R10/DDX39B/SRSF3/HSP90AB1/ALYREF/EIF4A3/RPL23/JUP/STRADA/KPNA2/SRSF1/SUPT6H/EIF5A/RPAIN/CPSF3/SRSF7/XPO1/RANBP2/BACH2/ANP32B/TXN/TSC1/RAN/APPL2/PPP1R12A/LRRK2/IPO8/DUSP16/STRADB/IWS1/WDR33/BAG3/TCF7L2/SUFU/EGR2/UBR5/RRS1/ABCE1/SDAD1/YTHDC1/…	84
GO:0030330	DNA damage response, signal transduction by p53 class mediator	35/2886	106/18862	4.12177e-06	0.000299774	0.000241691	RPS6KA6/MSX1/BTG2/DYRK3/CDC25C/PAXIP1/CNOT4/PLK3/GADD45A/MUC1/PMAIP1/DDX5/PPM1D/RPL26/TFDP2/SPRED2/ACER2/ING4/FOXM1/PLA2R1/ANKRD1/CDK1/SIRT1/NDRG1/BCL3/ARID3A/CNOT1/RBL2/CCNB1/PLK2/RGCC/DYRK1A/E2F1/AURKA/ATM	35
GO:0070507	regulation of microtubule cytoskeleton organization	42/2886	137/18862	4.17781e-06	0.000300317	0.000242129	HDAC6/MID1IP1/CCSAP/CAMSAP2/DYNC1H1/NIN/TRIM36/EFNA5/GNAI1/INPP5J/ATAT1/HSPA1A/HSPA1B/CDK5R1/SPAG5/CLASP2/CEP70/CLIP1/TRPV4/NAV3/FKBP4/CHMP2A/APC2/CYLD/PLK1/PKD1/MAP1B/OCLN/SKA3/DYRK1A/TPX2/SPEF1/STMN3/PHLDB1/DIXDC1/PAK1/MAP6/RPS3/KIF18A/CKAP5/CDK2AP2/RASSF7	42
GO:0030218	erythrocyte differentiation	37/2886	115/18862	4.41667e-06	0.000310271	0.000250155	KLF13/DYRK3/HIF1A/RPS14/HSPA9/SMAD5/ALAS1/NCAPG2/KMT2E/INHBA/ISG15/TAL1/ADAR/ANKRD54/PTPN2/TRIM10/HSPA1A/HSPA1B/VEGFA/SMAP1/JMJD6/KAT7/BCL6/SLC25A38/UFL1/FOXO3/RPS6/INPP5D/ZNF16/DMTN/HMGB2/RPS19/ZFP36/ZFPM1/PKNOX1/FAM210B/ETS1	37
GO:0007517	muscle organ development	79/2886	317/18862	4.79266e-06	0.000332901	0.0002684	SRPK3/FOXO4/MEF2A/NR2F2/CHD2/EVC/MSX1/DLL4/COPS2/ZBTB18/ACTA1/TNNT2/BTG2/ATF3/CENPF/TGFB2/HLX/SIX4/CFL2/HBEGF/EGR1/LOX/MYH15/MYLK/WNT5A/SMO/SGCE/HEYL/MEF2D/IGSF8/MAPK12/MAFF/SMTN/BCL2/FOXC1/TCAP/FZD2/DDX5/NOG/SOX15/NR1D2/FXR1/FOXN2/UTRN/CNTFR/ENG/MYL6/ERBB3/GPC1/SPEG/LRP2/NEB/ANKRD1/EGR2/SIRT1/BMPR1A/FOXH1/JPH1/CHD7/EGR3/BIN3/FRG1/SAP30/SGCB/MYH14/SIRT2/EEF2/ZFPM1/CTF1/CACNA1H/HOMER1/NLN/POU4F1/K…	79
GO:0090068	positive regulation of cell cycle process	76/2886	303/18862	5.60239e-06	0.000368447	0.000297058	FOXO4/DDX3X/MSX1/KIF23/PBX1/BTG2/DYRK3/DYNC1H1/HSPA2/NPM1/CDC25C/CDC23/WNT5A/HYAL1/RHOA/EZH2/CNOT4/KMT2E/DBF4/TP73/ZBTB17/PLK3/GADD45A/CDC7/CDC14A/MUC1/RANBP1/RPL23/CDC6/CDC27/SPHK1/STXBP4/CDK5R1/SPAG5/RNF112/CENPV/RPL26/AURKB/SOX15/TFDP2/EIF4G1/PRKCE/PHIP/ANXA1/HMGA2/GLI1/RACGAP1/CUL3/KIF20B/CDK1/ZNF16/RAD21/UBXN2B/PLK4/EREG/ANKRD17/PAF1/SIRT2/INSR/ARID3A/CDK10/SMPD3/CNOT1/RBL2/SH2B1/SSTR5/CCNB1…	76
GO:0048568	embryonic organ development	97/2886	412/18862	6.00733e-06	0.000390919	0.000315177	MMP14/NR2F2/MSX1/BBS4/PBX1/TGFB2/HLX/VASH1/TGFB3/HIF1A/SIX4/NDST1/IFT122/LRIG1/WNT5A/HYAL1/SETD2/INSIG1/SMO/HOXA2/HOXA3/EPHA2/EPHB2/TAL1/STIL/NES/WNT7B/ATF4/TTC39C/TSHZ1/FOXC1/SLC44A4/TEAD3/VEGFA/EIF4A3/CCDC40/HOXB9/HOXB5/TCAP/KRT19/FZD2/CCDC103/RPL38/NOG/RNF112/SOX15/HES1/CCDC39/TRA2B/IFT172/PKDCC/EFEMP1/PAX8/MTHFD1L/RSPO3/AHI1/PTCH1/ROR2/ENG/TPRN/KDM2B/CHST11/CEP290/ALX1/FRS2/LRIG3/GLI1/HOXC4/R…	97
GO:1904816	positive regulation of protein localization to chromosome, telomeric region	9/2886	12/18862	6.42761e-06	0.000413911	0.000333714	GNL3/CCT6A/CCT3/CCT4/CCT7/TCP1/CCT2/CCT5/CCT8	9
GO:0045646	regulation of erythrocyte differentiation	20/2886	47/18862	6.82911e-06	0.000435233	0.000350904	KLF13/HIF1A/HSPA9/NCAPG2/INHBA/ISG15/TAL1/ANKRD54/HSPA1A/HSPA1B/SMAP1/KAT7/FOXO3/INPP5D/ZNF16/HMGB2/ZFP36/ZFPM1/FAM210B/ETS1	20
GO:0016569	covalent chromatin modification	106/2886	461/18862	6.98505e-06	0.000440628	0.000355255	HDAC8/USP51/HDAC6/KDM6A/BAZ1B/EID1/WDR61/TAF5L/KDM5B/VRK1/MBIP/BAZ1A/UIMC1/JADE2/CHD1/DTX3L/HDAC11/BRPF1/SETD5/RYBP/MST1/SETD2/PAXIP1/KMT2C/EZH2/KDM7A/KMT2E/CHD5/MTHFR/RLF/MYSM1/MIER1/MTF2/PYGO2/MUC1/BRPF3/VEGFA/ZNF451/USP36/MLLT6/EZH1/HDAC5/KANSL1/JMJD6/KAT7/TADA2A/SUPT6H/USP22/AURKB/PER1/KDM6B/BCL6/DNMT3A/DPY30/TET3/UFL1/HDAC2/PHF19/GTF3C4/KDM2B/SUDS3/SART3/NR1H4/HMGA2/USP15/MAP3K12/KANSL2/PPHL…	106
GO:1903829	positive regulation of cellular protein localization	74/2886	295/18862	7.3696e-06	0.000455589	0.000367316	CNPY4/FIS1/SNX33/CEMIP/CNST/ATP2B4/TP53BP2/FERMT2/SQSTM1/PARP9/DTX3L/GNL3/SMO/GNAI1/CCT6A/UBE2J2/TP73/EPHA2/CROCC/EPHB2/ZC3H12A/PDZK1/CCT3/MGAT3/PMAIP1/BCL2/HSPA1L/HSP90AB1/USP36/NGFR/ERBB2/JUP/KAT7/ITGA3/CDK5R1/MIEF2/TFDP2/PRKCE/SPTBN1/CCT4/CCT7/EIF2AK3/TCP1/FYN/RAN/CCT2/LRP1/C2CD5/VIL1/BAG3/SORBS1/ANK3/CDK1/KIF5B/UBR5/YWHAZ/FBXW7/BBC3/AKT2/PDCD5/ZDHHC1/PARD6A/PLK1/GLIS2/CCT5/ITGB2/CCT8/SLC5A3/C…	74
GO:1904851	positive regulation of establishment of protein localization to telomere	8/2886	10/18862	1.0018e-05	0.000607172	0.000489529	CCT6A/CCT3/CCT4/CCT7/TCP1/CCT2/CCT5/CCT8	8
GO:1901990	regulation of mitotic cell cycle phase transition	101/2886	439/18862	1.11059e-05	0.000660205	0.000532287	FOXO4/DDX3X/HAUS4/PBX1/BTG2/NEK2/CENPF/HSP90AA1/DYNC1H1/HSPA2/DACT1/PSME1/DUSP1/HMMR/CDC25C/CDC23/XPC/PSMD6/HYAL1/EZH2/CNOT4/CEP41/PRKAR2B/KMT2E/ANLN/HUS1/MIIP/CDC20/PLK3/CDKN2C/ORC1/GADD45A/CDC7/CDC14A/MUC1/KLHL22/CEP76/BCL2/TUBB/PSMD3/CDC6/TUBG1/CDC27/PSMC5/RPL26/AURKB/CEP70/TFDP2/PSMD2/EIF4G1/CTDSPL/BUB1/TTK/ANXA1/KLF4/ANAPC2/SSNA1/KNTC1/APPL2/CEP290/HMGA2/CUL3/NABP1/PSMD14/BTRC/CDK1/ANAPC16/R…	101
GO:0006364	rRNA processing	60/2886	228/18862	1.11066e-05	0.000660205	0.000532287	UTP14A/ISG20/HEATR1/RNASEL/RPS14/SRFBP1/RRP9/RPL14/EXOSC10/RPL11/ERI3/RPS8/RPL5/WDR3/RPS27/RIOK3/RIOK1/RPL10A/BYSL/EIF4A3/USP36/RPL27/RPL26/RPS7/WDR43/RPS6/TEX10/RPL35/DHX37/PA2G4/WBP11/NOP2/NOP58/WDR75/RRP12/DDX21/RPS24/GTPBP4/RPL7/RRS1/CHD7/FRG1/EXOSC9/GAR1/HELQ/MRPL1/RPS9/RPS19/FBL/RPS16/RPS15/WDR18/RPS2/UTP15/FAM207A/XRN2/RPS21/DDX10/NAT10/WDR74	60
GO:0016072	rRNA metabolic process	62/2886	238/18862	1.1289e-05	0.000664652	0.000535873	UTP14A/ISG20/HEATR1/RNASEL/RPS14/SRFBP1/RRP9/RPL14/EXOSC10/RPL11/ERI3/RPS8/RPL5/WDR3/RPS27/RIOK3/RIOK1/RPL10A/BYSL/EIF4A3/USP36/RPL27/RPL26/RPS7/WDR43/RPS6/TEX10/RPL35/DHX37/PA2G4/WBP11/NOP2/NOP58/WDR75/RRP12/DDX21/RPS24/GTPBP4/RPL7/RRS1/CHD7/FRG1/EXOSC9/GAR1/HELQ/MRPL1/RPS9/DEDD2/RPS19/FBL/RPS16/RPS15/WDR18/RPS2/UTP15/PELO/FAM207A/XRN2/RPS21/DDX10/NAT10/WDR74	62
GO:0015931	nucleobase-containing compound transport	65/2886	253/18862	1.13973e-05	0.000664697	0.000535909	ABCD1/SLC29A4/CPSF4/DHX9/ADORA1/NRDE2/NPM1/SLC35A4/SLC35A5/SETD2/NUP205/SLC35B4/HNRNPA2B1/SLC25A33/RSC1A1/SRRM1/YBX1/SLC35D1/SRSF11/SLC35A3/RIPK1/NUP153/DDX39B/SRSF3/ALYREF/EIF4A3/SLC35B1/SRSF1/SUPT6H/EIF5A/CPSF3/SRSF7/XPO1/RANBP2/QKI/MRPL18/GJA1/SLC35A1/SLC25A51/SLC25A25/TSC1/RAN/IWS1/WDR33/ARC/RRS1/ABCE1/SDAD1/G3BP2/YTHDC1/ZFP36/SLC25A42/DDX39A/RPS15/SMG1/ABCC6/RNPS1/NUP155/SLC19A1/U2AF1/NXT1/N…	65
GO:0072175	epithelial tube formation	38/2886	125/18862	1.45555e-05	0.000830507	0.000669593	BBS4/TGFB2/HIF1A/SIX4/IFT122/WNT5A/SETD2/PIK3CD/MTHFR/STIL/BCL10/CELSR1/CECR2/BRD2/TCAP/FZD2/NOG/RPS7/IFT172/PAX8/SEMA4C/MTHFD1L/PTCH1/TSC1/KDM2B/TCTN1/CEP290/RARG/TULP3/LRP2/SUFU/KIF20B/FZD6/STK3/DLC1/SHROOM3/VASP/ADM	38
GO:0050684	regulation of mRNA processing	41/2886	139/18862	1.53386e-05	0.000854264	0.000688746	SRPK3/CPSF4/PRDX6/DHX9/SRPK2/TRA2A/HNRNPA2B1/CDK11B/RBMXL1/RBM15/SRSF3/RBFOX3/DDX5/JMJD6/SUPT6H/C1QBP/FXR1/TRA2B/SRSF7/QKI/WTAP/HNRNPK/SFSWAP/ZC3H10/NCL/CWC22/IWS1/PUF60/KHDRBS3/YTHDC1/NOVA2/PAF1/SAFB/PTBP1/RNPS1/CCNB1/DYRK1A/RBM39/HSPA8/NUP98/CTR9	41
GO:0016570	histone modification	102/2886	448/18862	1.6012e-05	0.000880185	0.000709645	HDAC8/USP51/HDAC6/KDM6A/BAZ1B/EID1/WDR61/TAF5L/KDM5B/VRK1/MBIP/BAZ1A/UIMC1/JADE2/DTX3L/HDAC11/BRPF1/SETD5/RYBP/MST1/SETD2/PAXIP1/KMT2C/EZH2/KDM7A/KMT2E/CHD5/MTHFR/RLF/MYSM1/MIER1/MTF2/PYGO2/MUC1/BRPF3/VEGFA/ZNF451/USP36/MLLT6/EZH1/HDAC5/KANSL1/JMJD6/KAT7/TADA2A/SUPT6H/USP22/AURKB/PER1/KDM6B/BCL6/DPY30/TET3/UFL1/HDAC2/PHF19/GTF3C4/KDM2B/SUDS3/SART3/NR1H4/HMGA2/USP15/MAP3K12/KANSL2/LRRK2/ING4/PER2/…	102
GO:2000573	positive regulation of DNA biosynthetic process	24/2886	65/18862	1.60888e-05	0.000880185	0.000709645	NEK2/HSP90AA1/FGFR4/CCT6A/CCT3/DDX39B/HSP90AB1/POLG2/AURKB/CCT4/CCT7/TCP1/KLF4/CCT2/PTGES3/XRCC5/MYC/PARM1/PARN/CCT5/RGCC/CCT8/SRC/ATM	24
GO:0021537	telencephalon development	60/2886	231/18862	1.70715e-05	0.000925757	0.000746387	PLXNA3/HPRT1/SLIT2/BBS4/SEMA7A/BTG2/ATP2B4/SRGAP2/NUMB/HIF1A/NIN/ROBO2/ARL13B/WNT5A/EZH2/SMO/FOXP2/LAMB1/INHBA/EPHB2/MFSD2A/SLC2A1/BCAN/RTN4R/CDH2/ATAT1/EFHC1/EZH1/CDK5R1/KDM6B/HES1/TRA2B/ALK/NR2E1/AGTPBP1/TSC1/KDM2B/TCTN1/LRP1/SLC38A2/LRRK2/TBR1/EMX2/DPCD/KIF5B/CHD7/SLC7A11/ATF5/BBS2/RPGRIP1L/ZSWIM6/DNAH5/SLITRK5/GART/XRN2/BTBD3/BMP2/PLCB1/DIXDC1/TSKU	60
GO:0008203	cholesterol metabolic process	43/2886	149/18862	1.74854e-05	0.000939957	0.000757836	MBTPS2/DGKQ/LBR/INSIG1/DHCR24/LEPR/PMVK/GBA/FDPS/SEC14L2/NPC1/FASN/NFE2L1/STARD3/ACLY/SCARF1/ACAT2/CEL/RAN/SCARB1/ACACB/NR1H4/LIMA1/LPCAT3/HDLBP/GPAM/SCD/CUBN/SQLE/EPHX2/FDFT1/MSMO1/LDLR/MBTPS1/CETP/HMGCS1/SOD1/APOA4/TSKU/CAT/TM7SF2/DHCR7/OSBPL5	43
GO:0010506	regulation of autophagy	79/2886	328/18862	1.81326e-05	0.000958081	0.000772448	UBQLN2/HDAC6/DHRSX/LAMTOR4/BMF/ABL2/RAB3GAP2/SPTLC2/HIF1A/ADRB2/ATP6V1A/ITPR1/WDR6/FYCO1/PRKAG2/RHEB/EXOC4/ATP13A2/ZC3H12A/PLK3/TMEM59/LEPR/GBA/IFI16/HMOX1/KLHL22/NPC1/BCL2/TRIM38/TRIM27/EEF1A1/USP36/OSBPL7/PIP4K2B/MTMR4/CDK5R1/EIF4G1/TMEM150A/BCL2L11/UFL1/FOXO3/SPTLC1/ACER2/TSC1/ULK1/CAMKK2/HSPB8/TPCN1/DDIT3/ATG101/LRRK2/GAPDH/SH3BP4/BAG3/SIRT1/WAC/OPTN/NRBP2/MTDH/TP53INP1/RIPK2/ATP6V1H/BNIP3L/F…	79
GO:0010975	regulation of neuron projection development	98/2886	428/18862	1.83018e-05	0.000958829	0.000773051	PLXNA3/PLXNB3/SEMA4B/STYXL1/CRMP1/SLIT2/LTK/SEMA7A/ABL2/RGS2/CAMSAP2/RAB29/NIN/FBXO38/SPOCK1/ROBO2/PLXNA1/PLXND1/WNT5A/SEMA3B/RHOA/PLXNB1/EZH2/SEMA3C/FZD1/HECW1/CAMK2B/EPHB2/MACF1/MFSD2A/CDC20/LRRC7/NGF/SEMA6C/CHRNB2/LGALS1/INPP5J/KREMEN1/RTN4R/CDH2/KIAA0319/CUL7/VEGFA/NGFR/WNT3/ITGA3/NME2/CDK5R1/SEZ6/SCARF1/PAK2/SKIL/NLGN1/DGKG/ALK/SEMA4C/RTN4IP1/NR2E1/SNX3/FYN/HDAC2/FUT9/ROR2/KANK1/KLF4/HSPA5/T…	98
GO:0035148	tube formation	41/2886	140/18862	1.85228e-05	0.000962253	0.000775812	BBS4/TGFB2/HIF1A/SIX4/IFT122/WNT5A/SETD2/PIK3CD/MTHFR/STIL/BCL10/CELSR1/CECR2/BRD2/VEGFA/TCAP/FZD2/NOG/RPS7/IFT172/ATOH8/PAX8/BCL2L11/SEMA4C/MTHFD1L/PTCH1/TSC1/KDM2B/TCTN1/CEP290/RARG/TULP3/LRP2/SUFU/KIF20B/FZD6/STK3/DLC1/SHROOM3/VASP/ADM	41
GO:0042770	signal transduction in response to DNA damage	39/2886	131/18862	1.93525e-05	0.000988736	0.000797164	RPS6KA6/MSX1/BTG2/DYRK3/UIMC1/CDC25C/PAXIP1/CNOT4/CASP9/PLK3/GADD45A/MUC1/PMAIP1/CDC5L/DDX5/PPM1D/RPL26/TFDP2/SPRED2/ACER2/ING4/FOXM1/PLA2R1/ANKRD1/CDK1/SIRT1/NDRG1/BCL3/ARID3A/CNOT1/RBL2/PLK1/CCNB1/PLK2/RGCC/DYRK1A/E2F1/AURKA/ATM	39
GO:0046890	regulation of lipid biosynthetic process	54/2886	203/18862	2.15336e-05	0.00108228	0.000872585	ABCD1/MID1IP1/MBTPS2/DGKQ/SLC45A3/FGFR4/EGR1/INSIG1/PRKAG2/WDTC1/MFSD2A/PMVK/FDPS/SEC14L2/FASN/NR1D1/SPHK1/ANXA1/ABCA2/RAN/SCARB1/ACACB/NR1H4/AVIL/DHH/CREBL2/LPCAT3/ADIPOR2/IDH1/GPAM/SCD/SORBS1/SIRT1/SQLE/FABP5/ASAH1/FDFT1/FBXW7/NFKB1/LDLR/C3/MBTPS1/SMPD3/HMGCS1/PIBF1/SIK1/SOD1/TRIB3/BMP2/APOA4/ADM/NR1H3/TM7SF2/DHCR7	54
GO:0000086	G2/M transition of mitotic cell cycle	65/2886	258/18862	2.22467e-05	0.0011091	0.000894211	FOXO4/HAUS4/PBX1/NEK2/CENPF/HSP90AA1/DYNC1H1/HSPA2/PSME1/FBXW11/HMMR/CDC25C/FBXL17/PSMD6/CEP41/PRKAR2B/CDK14/HUS1/MIIP/PLK3/ORC1/CDC7/NES/CEP76/TUBB/CCDC57/PSMD3/CDC6/TUBG1/PSMC5/PPM1D/AURKB/CEP70/PSMD2/PPP1CB/SSNA1/CEP290/PPP1R12A/HMGA2/FOXM1/NABP1/PSMD14/BTRC/CDK1/OPTN/RAD21/PPP2R2A/PLK4/CEP135/PLK1/CDK7/CCNB1/SKP2/CEP250/TPX2/PLCB1/AURKA/PSMA7/CEP164/ATM/WEE1/USP47/USH1C/CKAP5/PSMC3	65
GO:0035970	peptidyl-threonine dephosphorylation	12/2886	22/18862	2.30746e-05	0.00113212	0.000912768	DUSP9/DUSP10/DUSP1/PPP2CA/DUSP18/PPM1D/PPM1G/DUSP6/DUSP16/DUSP5/DUSP4/DUSP8	12
GO:0045648	positive regulation of erythrocyte differentiation	15/2886	32/18862	2.39148e-05	0.00116411	0.000938555	HIF1A/INHBA/ISG15/TAL1/ANKRD54/HSPA1A/HSPA1B/SMAP1/KAT7/FOXO3/INPP5D/ZNF16/HMGB2/FAM210B/ETS1	15
GO:1905475	regulation of protein localization to membrane	52/2886	194/18862	2.4217e-05	0.00116961	0.00094299	GPC3/IQSEC2/GRIPAP1/MMP14/CNPY4/FIS1/CEMIP/CNST/ATP2B4/TP53BP2/NUMB/SQSTM1/TP73/RSC1A1/EPHA2/EPHB2/TMEM59/PDZK1/CDH2/PMAIP1/BCL2/ERBB2/ITGA3/CDK5R1/MIEF2/LRRC15/TFDP2/PKDCC/PRKCE/SPTBN1/FYN/SLC1A1/LRP1/C2CD5/GPC1/VIL1/SORBS1/ANK3/KIF5B/YWHAZ/DMTN/SLC7A11/BBC3/AKT2/PDCD5/DAB2/ITGB2/SLC5A3/E2F1/PAK1/ZDHHC5/PPFIA1	52
GO:0001838	embryonic epithelial tube formation	35/2886	114/18862	2.46837e-05	0.00117938	0.000950867	BBS4/TGFB2/HIF1A/SIX4/IFT122/WNT5A/SETD2/MTHFR/STIL/BCL10/CELSR1/CECR2/BRD2/FZD2/NOG/RPS7/IFT172/PAX8/SEMA4C/MTHFD1L/PTCH1/TSC1/KDM2B/TCTN1/RARG/TULP3/LRP2/SUFU/KIF20B/FZD6/STK3/DLC1/SHROOM3/VASP/ADM	35
GO:0018105	peptidyl-serine phosphorylation	75/2886	310/18862	2.48137e-05	0.00117938	0.000950867	RPS6KA6/HDAC6/DGKQ/ATP2B4/DYRK3/MARK3/HSP90AA1/VRK1/BDKRB2/CSNK1A1/STK32A/FNIP1/RAF1/WNT5A/MST1/SRPK2/IL6/MAST2/GADD45A/CDC7/BCAR3/NGF/MAPK12/INPP5J/BCL2/RIPK1/STK38/TTBK1/VEGFA/HSP90AB1/CDK5R1/AURKB/PAK2/EIF4G1/PRKCE/EIF2AK3/RPS6KA2/CNKSR3/SGK1/TTK/SLC1A1/TXN/ULK1/HMGA2/MAP3K12/LRRK2/STK38L/CREBL2/CLK1/DKK1/CDK1/DDIT4/RIPK2/IKBKB/DMTN/IL11/PRKCG/HRC/SPTBN4/AKT2/PLK1/SMG1/PKD1/CCNB1/PLK2/GAS6/LAT…	75
GO:0031397	negative regulation of protein ubiquitination	27/2886	79/18862	2.49916e-05	0.00117938	0.000950867	HDAC8/SQSTM1/PRR7/DTX3L/ISG15/RPL11/RPL5/HSPA1A/HSPA1B/RPL23/NXN/RPS7/PRKCE/UFL1/FYN/TNFAIP3/DNAJA1/CRY1/PER2/TRIP12/GTPBP4/PARP10/UBR5/PRKCG/RPS3/PRMT3/UBXN1	27
GO:0042274	ribosomal small subunit biogenesis	26/2886	75/18862	2.64558e-05	0.00122052	0.00098404	HEATR1/NPM1/RPS14/SRFBP1/RPS8/WDR3/RPS27/RIOK3/RIOK1/RPS10/BYSL/RPL38/RPSA/RPS7/RPS6/DHX37/XRCC5/RPS24/RRS1/RPS5/RPS19/RPS16/RPS15/FAM207A/RPS21/NAT10	26
GO:0034504	protein localization to nucleus	68/2886	275/18862	2.78513e-05	0.00126601	0.00102071	MSX1/BBS4/SIX4/FERMT2/NFKBIA/PARP9/DTX3L/SMO/CCT6A/ATP13A2/RPL11/ZC3H12A/TXNIP/LMNA/CCT3/RANGAP1/EIF4ENIF1/CHCHD10/NUP153/E2F3/PPP1R10/BYSL/HSP90AB1/NGFR/RPL23/JUP/KPNA2/KAT7/RPAIN/CCT4/CCT7/EIF2AK3/RANBP2/TCP1/SYNE1/FYN/TOPORS/TXN/TOR1A/RAN/APPL2/CCT2/LRRK2/IPO8/BAG3/SUFU/CDK1/TAF3/UBR5/RRS1/BCL3/PAF1/CALR/ELAVL1/MBTPS1/PLK1/GLIS2/NUP155/CCT5/UFM1/LATS2/MORC3/CCT8/NXT1/MAVS/SRC/PKIG/NUP98	68
GO:2000637	positive regulation of gene silencing by miRNA	14/2886	29/18862	2.95308e-05	0.00133255	0.00107436	DHX9/LIMD1/IL6/PUM1/TNRC6B/EIF4ENIF1/RIPK1/DDX5/FXR1/EIF4G1/PUM2/EIF4E2/AGO2/ZFP36	14
GO:0070203	regulation of establishment of protein localization to telomere	8/2886	11/18862	3.1768e-05	0.0013936	0.00112359	CCT6A/CCT3/CCT4/CCT7/TCP1/CCT2/CCT5/CCT8	8
GO:1904869	regulation of protein localization to Cajal body	8/2886	11/18862	3.1768e-05	0.0013936	0.00112359	CCT6A/CCT3/CCT4/CCT7/TCP1/CCT2/CCT5/CCT8	8
GO:1904871	positive regulation of protein localization to Cajal body	8/2886	11/18862	3.1768e-05	0.0013936	0.00112359	CCT6A/CCT3/CCT4/CCT7/TCP1/CCT2/CCT5/CCT8	8
GO:0018209	peptidyl-serine modification	79/2886	333/18862	3.19392e-05	0.0013936	0.00112359	RPS6KA6/HDAC6/PARP2/DGKQ/ATP2B4/DYRK3/MARK3/HSP90AA1/VRK1/BDKRB2/CSNK1A1/STK32A/FNIP1/RAF1/WNT5A/MST1/SRPK2/IL6/MAST2/GADD45A/CDC7/BCAR3/NGF/MAPK12/INPP5J/BCL2/RIPK1/STK38/TTBK1/VEGFA/HSP90AB1/CDK5R1/AURKB/PAK2/EIF4G1/PRKCE/EIF2AK3/RPS6KA2/CNKSR3/SGK1/TTK/SLC1A1/TXN/ULK1/GALNT4/HMGA2/MAP3K12/LRRK2/STK38L/CREBL2/CLK1/DKK1/CDK1/SPOCK2/DDIT4/RIPK2/IKBKB/DMTN/SPOCK3/IL11/PRKCG/HRC/SPTBN4/AKT2/PLK1/SM…	79
GO:1902850	microtubule cytoskeleton organization involved in mitosis	41/2886	143/18862	3.20628e-05	0.0013936	0.00112359	KIF4A/PRC1/KIF23/CCSAP/NEK2/DYNC1H1/FBXW11/SPICE1/RHOA/SETD2/GNAI1/CDC20/STIL/HSPA1A/HSPA1B/PKHD1/EFHC1/TUBG1/AURKB/CLASP2/CENPA/GJA1/TTK/RAN/RACGAP1/KIFC2/UBXN2B/CENPE/CHMP2A/CCDC61/PLK1/PKD1/CCNB1/KIF2A/PLK2/PIBF1/KIF3B/TPX2/MYBL2/AURKA/CKAP5	41
GO:1902895	positive regulation of pri-miRNA transcription by RNA polymerase II	17/2886	40/18862	3.38868e-05	0.00145478	0.00117291	SMAD6/TGFB2/HIF1A/NR3C1/EGR1/PPARG/GNL3/JUN/NGFR/ATOH8/FOXO3/KLF4/BMPR1A/KLF5/BMP2/ETS1/FOSL1	17
GO:0034219	carbohydrate transmembrane transport	35/2886	116/18862	3.71073e-05	0.00156053	0.00125817	GPC3/MEF2A/RNASEL/SLC45A3/SLC23A1/PRKAG2/RSC1A1/SLC2A1/SLC5A9/PEA15/SLC2A11/SLC25A27/SLC17A5/STXBP4/SLC2A2/NR4A3/SLC27A4/TSC1/HNF1A/APPL2/C2CD5/CREBL2/ADIPOR2/CAPN10/SORBS1/FABP5/RTN2/AKT2/INSR/C3/OCLN/SLC5A3/TRIB3/SLC23A2/SLC2A10	35
GO:2001235	positive regulation of apoptotic signaling pathway	37/2886	126/18862	4.34292e-05	0.00178525	0.00143935	FIS1/STYXL1/MSX1/THBS1/BMF/AGT/ATF3/INHBA/RPL11/FAF1/BCL10/PEA15/PTPN2/PMAIP1/BCL2/RIPK1/NGFR/UBB/RPL26/PAK2/SKIL/RPS7/BCL2L11/DDIT3/ITM2C/FAS/SIRT1/STK3/FBXW7/BBC3/DEDD2/DAPK3/CYLD/SOD1/SERINC3/CTSC/RPS3	37
GO:0033157	regulation of intracellular protein transport	62/2886	248/18862	4.35071e-05	0.00178525	0.00143935	GRIPAP1/FIS1/CTDSPL2/CEMIP/SEC16B/RAB29/YOD1/PTPN14/TP53BP2/INSIG1/SMO/UBE2J2/TP73/ATP13A2/ZC3H12A/PLK3/PDZK1/RANGAP1/PMAIP1/BCL2/HSPA1L/HSP90AB1/USP36/ERBB2/JUP/CDK5R1/MIEF2/TFDP2/PARL/FYN/SLC1A1/ANP32B/TXN/RAN/CEP290/OS9/LRRK2/C2CD5/TTC21B/BAG3/TCF7L2/SUFU/KIF20B/ANK3/KIF5B/UBR5/YWHAZ/BNIP3L/DMTN/FBXW7/BBC3/AKT2/PDCD5/GAS6/UFM1/XPO4/ITGB2/E2F1/MAVS/PKIG/PAK1/CHRM1	62
GO:1904814	regulation of protein localization to chromosome, telomeric region	9/2886	14/18862	4.36061e-05	0.00178525	0.00143935	GNL3/CCT6A/CCT3/CCT4/CCT7/TCP1/CCT2/CCT5/CCT8	9
GO:0008589	regulation of smoothened signaling pathway	26/2886	77/18862	4.44611e-05	0.00180828	0.00145792	GPC3/EVC/ULK3/GPR161/NDST1/TXNDC15/FBXL17/IFT122/SMO/DCDC2/IFT172/PTCH1/GAS1/TCTN1/GLI1/TULP3/ARMC9/STK36/WDR11/SUFU/BTRC/INTU/MEGF8/RPGRIP1L/GLIS2/C2CD3	26
GO:0071156	regulation of cell cycle arrest	33/2886	108/18862	4.62412e-05	0.00186839	0.00150638	HMGN5/FOXO4/BTG2/CDC25C/CNOT4/TP73/SLC25A33/ZBTB17/PLK3/GADD45A/MUC1/HSP90AB1/RPL23/CDK5R1/RNF112/RPL26/TFDP2/ZNF268/HMGA2/FOXM1/CDK1/AKT2/CALR/ARID3A/CNOT1/RBL2/CCNB1/PLK2/POU4F1/RGCC/E2F1/AURKA/ATM	33
GO:0060148	positive regulation of posttranscriptional gene silencing	14/2886	30/18862	4.75895e-05	0.00191038	0.00154023	DHX9/LIMD1/IL6/PUM1/TNRC6B/EIF4ENIF1/RIPK1/DDX5/FXR1/EIF4G1/PUM2/EIF4E2/AGO2/ZFP36	14
GO:0007178	transmembrane receptor protein serine/threonine kinase signaling pathway	83/2886	358/18862	4.8899e-05	0.00192755	0.00155408	GPC3/USP9X/SMURF1/MSX1/THBS1/CTDSPL2/SMAD6/TGFB2/TGFB3/FERMT2/EGR1/SMAD5/LOX/NREP/RGMB/PPARG/WNT5A/RHOA/ZYX/INHBA/NBL1/JUN/TAB1/ONECUT2/HIVEP1/KIAA0319/HSPA1A/HSP90AB1/ZNF451/CD109/DDX5/ITGA3/NOG/MTMR4/FAM83G/UBB/HES1/VEPH1/SKIL/EMILIN1/RPS27A/SPRED2/ATOH8/TTK/ROR2/HSPA5/ENG/UBC/BTBD11/APPL2/CHST11/LEMD3/USP15/LRP2/PDCD4/DKK1/SIRT1/BMPR1A/PARD3/VIM/FOXH1/ING2/MEGF8/LTBP4/UBA52/GDF15/ARHGEF18/PARD…	83
GO:0071902	positive regulation of protein serine/threonine kinase activity	74/2886	311/18862	5.04198e-05	0.00196035	0.00158052	DUSP9/DDX3X/ADAM8/THBS1/CEMIP/AGT/ATP2B4/TGFB3/FERMT2/FGF18/ADRB2/PPP2CA/IRAK2/WNT5A/RHOA/EZH2/DBF4/TP73/MAP3K6/GADD45A/PEA15/MAPK11/TAB1/TNFRSF11A/RIPK1/DAXX/VEGFA/HSP90AB1/ERBB2/CDC6/STRADA/CDK5R1/MAP2K3/UBB/NEK10/SPDYA/ALK/RPS27A/CD24/ROR2/UBC/DUSP6/FRS2/HMGA2/MAP3K12/DAZAP2/LRRK2/DUSP5/AVPI1/DKK1/CDK1/SIRT1/STK3/RIPK2/FGFR1/ACSL1/UBA52/GDF15/INSR/GADD45B/PKD1/MAPK8IP3/CCNB1/GHR/RGCC/TIAM1/SOD…	74
GO:0097711	ciliary basal body-plasma membrane docking	30/2886	95/18862	5.09046e-05	0.00196683	0.00158575	HAUS4/CC2D2A/NEK2/HSP90AA1/DYNC1H1/CEP41/PRKAR2B/CEP76/TUBB/TUBG1/FBF1/MKS1/CEP70/AHI1/SSNA1/TCTN2/TCTN1/CEP290/TCTN3/CDK1/TMEM67/SCLT1/PLK4/CEP135/RPGRIP1L/PLK1/CEP250/CEP164/C2CD3/CKAP5	30
GO:0007052	mitotic spindle organization	35/2886	118/18862	5.49769e-05	0.00211098	0.00170197	KIF4A/PRC1/KIF23/CCSAP/NEK2/DYNC1H1/SPICE1/RHOA/GNAI1/CDC20/STIL/HSPA1A/HSPA1B/EFHC1/TUBG1/AURKB/CLASP2/TTK/RAN/RACGAP1/KIFC2/CENPE/CHMP2A/CCDC61/PLK1/PKD1/CCNB1/KIF2A/PLK2/PIBF1/KIF3B/TPX2/MYBL2/AURKA/CKAP5	35
GO:0050810	regulation of steroid biosynthetic process	29/2886	91/18862	5.60008e-05	0.0021264	0.0017144	MBTPS2/DGKQ/FGFR4/EGR1/INSIG1/PMVK/FDPS/SEC14L2/FASN/NR1D1/RAN/ACACB/NR1H4/DHH/LPCAT3/GPAM/SCD/SIRT1/SQLE/ASAH1/FDFT1/NFKB1/MBTPS1/HMGCS1/SOD1/BMP2/ADM/TM7SF2/DHCR7	29
GO:0045599	negative regulation of fat cell differentiation	20/2886	53/18862	5.60666e-05	0.0021264	0.0017144	FERMT2/WNT5A/INSIG1/IL6/ZADH2/TRIB2/DDIT3/SIRT1/BBS12/SIRT2/LRP3/ZFPM1/TGFB1I1/TRIO/FOXO1/E2F1/ASXL1/TRIB3/ARNTL/CCDC85B	20
GO:0007088	regulation of mitotic nuclear division	33/2886	109/18862	5.66937e-05	0.00213708	0.00172301	NEK2/CENPF/DUSP1/CDC25C/CDC23/CDC20/KLHL22/CUL7/CDC27/SPHK1/TOM1L2/AURKB/BUB1/TTK/PHIP/KNTC1/CUL3/OBSL1/MKI67/KIF20B/RAD21/EREG/CCDC8/INSR/DAPK3/SMPD3/SH2B1/PLK1/CCNB1/RGCC/L3MBTL1/AURKA/ATM	33
GO:0048024	regulation of mRNA splicing, via spliceosome	31/2886	100/18862	5.71624e-05	0.00214168	0.00172672	PRDX6/SRPK2/TRA2A/HNRNPA2B1/RBMXL1/RBM15/SRSF3/RBFOX3/DDX5/JMJD6/C1QBP/FXR1/TRA2B/SRSF7/QKI/WTAP/HNRNPK/SFSWAP/ZC3H10/NCL/CWC22/PUF60/KHDRBS3/YTHDC1/NOVA2/PTBP1/RNPS1/DYRK1A/RBM39/HSPA8/NUP98	31
GO:0043405	regulation of MAP kinase activity	73/2886	307/18862	5.77663e-05	0.00214286	0.00172767	DUSP9/ADAM8/THBS1/AGT/RGS2/DUSP10/TGFB3/DUSP1/FGF18/SPRY4/PPP2CA/IRAK2/WNT5A/EZH2/TP73/EPHB2/MAP3K6/GADD45A/GBA/PEA15/MAPK11/TAB1/DUSP18/TNFRSF11A/RIPK1/DAXX/STK38/VEGFA/ERBB2/CD300A/DUSP14/MAP2K3/UBB/NEK10/TRIB2/ALK/RPS27A/SPRED2/CD24/ROR2/DNAJA1/UBC/DUSP6/FRS2/MAP3K12/LRRK2/DUSP16/PDCD4/DUSP5/AVPI1/DKK1/CDK1/TRIB1/RIPK2/FGFR1/DUSP4/UBA52/GDF15/INSR/GADD45B/MAPK8IP3/GHR/TIAM1/SOD1/TRIB3/BMP2/SRC…	73
GO:0030099	myeloid cell differentiation	94/2886	419/18862	6.11003e-05	0.00223206	0.00179959	GPC3/DHRS2/KLF13/THBS1/WDR61/IREB2/DYRK3/LBR/HIF1A/NFKBIA/RPS14/HSPA9/SMAD5/LOX/PPARG/MITF/ALAS1/NBEAL2/NCAPG2/KMT2C/CNOT4/KMT2E/LRRC17/INHBA/ISG15/PIK3CD/CASP9/EPHA2/AGO4/AGO1/TAL1/JUN/CSF1/RBM15/ADAR/GBA/IFI16/TNRC6B/ANKRD54/PTPN2/TNFRSF11A/RIPK1/TRIM10/HSPA1A/HSPA1B/VEGFA/SMAP1/CD109/FASN/JMJD6/KAT7/NME2/GP1BA/BCL6/SLC25A38/DPY30/UFL1/FOXO3/ROR2/RPS6/NR4A3/VPS33A/RARG/INPP5D/SIRT1/ZNF16/MYC/TR…	94
GO:0015749	monosaccharide transmembrane transport	34/2886	114/18862	6.1741e-05	0.00223206	0.00179959	GPC3/MEF2A/RNASEL/SLC45A3/SLC23A1/PRKAG2/RSC1A1/SLC2A1/SLC5A9/PEA15/SLC2A11/SLC25A27/STXBP4/SLC2A2/NR4A3/SLC27A4/TSC1/HNF1A/APPL2/C2CD5/CREBL2/ADIPOR2/CAPN10/SORBS1/FABP5/RTN2/AKT2/INSR/C3/OCLN/SLC5A3/TRIB3/SLC23A2/SLC2A10	34
GO:0032392	DNA geometric change	34/2886	114/18862	6.1741e-05	0.00223206	0.00179959	DDX3X/CHD8/CHD2/MCM7/DHX9/CHD1/XPC/HNRNPA2B1/CHD5/HFM1/XRCC6/GTF2H4/HMGA1/TOP2A/RECQL5/BRIP1/UBB/RPS27A/ASCC3/ANXA1/UBC/CHD4/XRCC5/SUPV3L1/RAD54B/CHD7/MCM4/HMGB2/HELQ/UBA52/CHD9/MCM8/GTF2H1/NAV2	34
GO:0048562	embryonic organ morphogenesis	67/2886	277/18862	6.5937e-05	0.0023642	0.00190612	MMP14/MSX1/BBS4/HLX/TGFB3/HIF1A/SIX4/NDST1/LRIG1/WNT5A/HYAL1/SETD2/INSIG1/SMO/HOXA2/HOXA3/EPHA2/EPHB2/STIL/TTC39C/TSHZ1/SLC44A4/EIF4A3/CCDC40/HOXB9/HOXB5/TCAP/FZD2/CCDC103/RPL38/NOG/HES1/CCDC39/IFT172/EFEMP1/PAX8/MTHFD1L/AHI1/ROR2/ENG/TPRN/KDM2B/CHST11/CEP290/ALX1/FRS2/LRIG3/GLI1/HOXC4/RARG/TULP3/GBX2/FRZB/HOXD3/HOXD4/TBR1/SUFU/PDZD7/FOXH1/FZD6/CHD7/MEGF8/HPN/SOD1/GNAS/C2CD3/USH1C	67
GO:0015849	organic acid transport	76/2886	324/18862	6.65432e-05	0.0023642	0.00190612	ABCD1/ACSL4/SLC16A2/SLC38A5/MID1IP1/SLC7A8/SLC7A7/SLC29A4/FIS1/SLC26A1/THBS1/SLC27A2/AQP9/RGS2/PPFIA4/ADORA1/BDKRB2/ABCD4/SFXN1/SLC23A1/SLC25A48/SLC6A6/PPARG/SLC38A3/PRKAG2/CROT/MFSD2A/SLC2A1/CPT2/CPT1B/ATP8B1/TNFRSF11A/NFKBIE/SLC17A5/SLC16A3/LLGL2/ABCC3/PROCA1/SLC46A1/SLC47A1/CTNS/SLC25A38/SLC3A1/SFXN5/GJA1/ANXA1/SLC1A1/SLC27A4/P2RX4/ACACB/NR1H4/GLS2/SLC38A2/PER2/LRP2/PLA2R1/ACSL5/SFXN3/FABP5/NC…	76
GO:0030201	heparan sulfate proteoglycan metabolic process	14/2886	31/18862	7.45977e-05	0.00260233	0.00209812	HS6ST2/GLCE/NDST1/EXTL2/SGSH/XYLT2/HS3ST3B1/PXYLP1/HS3ST5/DSE/GPC1/TCF7L2/NDST2/EXTL3	14
GO:0043433	negative regulation of DNA-binding transcription factor activity	47/2886	177/18862	7.46817e-05	0.00260233	0.00209812	TNFSF4/TRAF3/NFKBIA/IRAK2/BHLHE40/PAXIP1/EZH2/PEX14/ZC3H12A/HEYL/FAF1/RWDD3/HMOX1/PIM1/NFKBIE/PKHD1/FOXJ1/HES1/PELI1/UFL1/HDAC2/TNFAIP3/PTCH1/KLF4/NR1H4/DDIT3/TCF7L2/SUFU/BTRC/SIRT1/TAF3/FOXH1/PARP10/TRIB1/FZD6/G3BP2/CARD8/NFKBIB/KEAP1/CYLD/GLIS2/PKD1/GAS6/PRMT2/SIK1/CAT/SIGIRR	47
GO:0001704	formation of primary germ layer	34/2886	115/18862	7.49296e-05	0.00260233	0.00209812	MMP14/DUSP1/COL8A1/WNT5A/SETD2/EXOC4/LAMB1/INHBA/EPHA2/TAL1/FOXC1/COL12A1/WNT3/ITGB4/ITGA3/NOG/KDM6B/SOX2/ATOH8/GJA1/KLF4/TXNRD1/HMGA2/ITGA4/DUSP5/DKK1/BMPR1A/DUSP4/PAF1/ITGA2/COL4A2/COL6A1/ITGB2/CTR9	34
GO:0033044	regulation of chromosome organization	66/2886	273/18862	7.56156e-05	0.00261148	0.0021055	HDAC8/HNRNPC/WDR61/NEK2/CENPF/YLPM1/DUSP1/CDC23/GNL3/PAXIP1/KMT2E/HNRNPA2B1/CCT6A/EXOSC10/CDC20/TAL1/MIER1/MTF2/MUC1/CCT3/KLHL22/PPP1R10/VEGFA/CDC6/TOP2A/CDC27/AXIN2/KAT7/TADA2A/CENPV/AURKB/BCL6/CCT4/CCT7/BUB1/TCP1/TTK/PHF19/CHFR/KNTC1/SART3/CCT2/PPHLN1/LRRK2/CUL3/XRCC5/SIRT1/MYC/RAD21/ING2/CENPE/HNRNPD/PAF1/DNMT1/PLK1/SMG1/PARN/CCNB1/CCT5/MPHOSPH8/CCT8/SRC/ATM/CTR9/NAT10/CDCA5	66
GO:0070202	regulation of establishment of protein localization to chromosome	8/2886	12/18862	8.24488e-05	0.00278524	0.00224559	CCT6A/CCT3/CCT4/CCT7/TCP1/CCT2/CCT5/CCT8	8
GO:1903405	protein localization to nuclear body	8/2886	12/18862	8.24488e-05	0.00278524	0.00224559	CCT6A/CCT3/CCT4/CCT7/TCP1/CCT2/CCT5/CCT8	8
GO:1904867	protein localization to Cajal body	8/2886	12/18862	8.24488e-05	0.00278524	0.00224559	CCT6A/CCT3/CCT4/CCT7/TCP1/CCT2/CCT5/CCT8	8
GO:0009755	hormone-mediated signaling pathway	50/2886	193/18862	8.86342e-05	0.0029459	0.00237512	HDAC6/TRIP4/ESRRG/ESR2/NR3C1/PPARG/LANCL2/ARID1A/HEYL/SSTR3/DAXX/NR1D1/DDX5/PER1/NR1D2/UFL1/NR2E1/DNAJA1/NR4A3/CRY1/APPL2/CALCOCO1/RARG/ADIPOR2/GPAM/SIRT1/FOXH1/UBR5/ACSL1/PGRMC2/CALR/KANK2/SAFB/CNOT1/SSTR5/DAB2/PRLR/UFM1/LATS2/PRMT2/RUNX1/ASIP/SRC/PMEPA1/PGR/PAK1/TRIM68/ARNTL/GTF2H1/LGR4	50
GO:0034620	cellular response to unfolded protein	41/2886	149/18862	8.92966e-05	0.00295204	0.00238007	TSPYL2/MBTPS2/TMEM33/PPP1R15B/YOD1/ATF3/EIF2S1/HSPA2/HSPA9/ASNS/ZBTB17/EXTL2/LMNA/HSPA6/ATF4/PTPN2/HSPA1L/HSPA1A/HSPA1B/ATF6B/DAXX/CUL7/GOSR2/EIF2AK3/BCL2L11/UFL1/ERMP1/HSPA5/HSPB8/DDIT3/TMBIM6/HSPD1/BAG3/OPTN/EXTL3/CALR/MBTPS1/TMTC4/HSPA13/HSPA8/TPP1	41
GO:0071426	ribonucleoprotein complex export from nucleus	37/2886	130/18862	9.00756e-05	0.00296195	0.00238806	CPSF4/NPM1/SETD2/NUP205/HNRNPA2B1/SRRM1/SRSF11/NUP153/DDX39B/SRSF3/ALYREF/EIF4A3/SRSF1/SUPT6H/EIF5A/CPSF3/SRSF7/XPO1/RANBP2/TSC1/RAN/IWS1/WDR33/RRS1/ABCE1/SDAD1/YTHDC1/DDX39A/RPS15/SMG1/RNPS1/NUP155/U2AF1/NXT1/NUP98/NUP160/NXF1	37
GO:1904872	regulation of telomerase RNA localization to Cajal body	10/2886	18/18862	9.25416e-05	0.00302694	0.00244046	CCT6A/EXOSC10/CCT3/CCT4/CCT7/TCP1/CCT2/PARN/CCT5/CCT8	10
GO:0051783	regulation of nuclear division	38/2886	135/18862	9.43913e-05	0.00306106	0.00246797	MSX1/NEK2/CENPF/DUSP1/CDC25C/CDC23/WNT5A/CDC20/KLHL22/CUL7/CDC27/SPHK1/TOM1L2/AURKB/BUB1/TTK/PHIP/KNTC1/CUL3/OBSL1/MKI67/KIF20B/RAD21/EREG/CCDC8/SIRT2/CALR/INSR/DAPK3/SMPD3/SH2B1/PLK1/CCNB1/RGCC/PLCB1/L3MBTL1/AURKA/ATM	38
GO:0032508	DNA duplex unwinding	32/2886	107/18862	9.4575e-05	0.00306106	0.00246797	DDX3X/CHD8/CHD2/MCM7/DHX9/CHD1/XPC/CHD5/HFM1/XRCC6/GTF2H4/HMGA1/TOP2A/RECQL5/BRIP1/UBB/RPS27A/ASCC3/ANXA1/UBC/CHD4/XRCC5/SUPV3L1/RAD54B/CHD7/MCM4/HELQ/UBA52/CHD9/MCM8/GTF2H1/NAV2	32
GO:0016331	morphogenesis of embryonic epithelium	39/2886	140/18862	9.83154e-05	0.00311685	0.00251295	BBS4/TGFB2/HIF1A/SIX4/IFT122/WNT5A/SETD2/MTHFR/STIL/BCL10/WNT2B/CELSR1/WNT7B/CECR2/BRD2/FZD2/NOG/RPS7/IFT172/PAX8/SEMA4C/MTHFD1L/PTCH1/TSC1/KDM2B/TCTN1/RARG/TULP3/LRP2/SUFU/KIF20B/FZD6/STK3/DLC1/VEGFC/SHROOM3/VASP/TGFB1I1/ADM	39
GO:0031023	microtubule organizing center organization	39/2886	140/18862	9.83154e-05	0.00311685	0.00251295	HAUS4/BBS4/NEK2/NIN/FBXW11/NPM1/SPICE1/CROCC/STIL/GADD45A/RANBP1/CEP76/RTTN/PKHD1/CCDC57/FOXJ1/CLASP2/CEP68/PPP1R12A/CDK1/SIRT1/TMEM67/UBXN2B/PLK4/CEP135/CHMP2A/ATF5/CCDC61/PARD6A/PLK1/PLK2/CEP250/KIF3B/AURKA/CHORDC1/UVRAG/C2CD3/NAT10/CKAP5	39
GO:0046718	viral entry into host cell	39/2886	140/18862	9.83154e-05	0.00311685	0.00251295	ANPEP/CD46/GPR15/HYAL1/EPHA2/LGALS1/NPC1/NUP153/TRIM38/TRIM27/TRIM10/TRIM26/HSPA1A/HSPA1B/TRIM25/LGALS9/PTX3/RPSA/SNX3/HS3ST5/SCARB1/SELPLG/DPP4/CDK1/MRC1/SLC20A2/SCARB2/SLC1A5/PVR/AXL/LDLR/ITGA2/GAS6/EFNB2/UVRAG/TRIM68/TRIM6/TRIM5/IFITM1	39
GO:0035904	aorta development	20/2886	55/18862	0.000102842	0.00324373	0.00261524	DLL4/SMAD6/TGFB2/NDST1/LOX/ROBO2/MYLK/PLXND1/ADAMTS9/TAB1/NGFR/HES1/ENG/LRP1/LRP2/SUFU/BMPR1A/FOXH1/HEY1/CHD7	20
GO:0051972	regulation of telomerase activity	18/2886	47/18862	0.000104373	0.0032738	0.00263949	NEK2/HSP90AA1/PPARG/HNRNPA2B1/HSP90AB1/AURKB/CCT4/TCP1/KLF4/CCT2/PTGES3/XRCC5/MYC/HNRNPD/PARM1/PARN/PARP4/SRC	18
GO:1900182	positive regulation of protein localization to nucleus	27/2886	85/18862	0.000105999	0.0032738	0.00263949	FERMT2/PARP9/DTX3L/SMO/CCT6A/ZC3H12A/CCT3/HSP90AB1/NGFR/JUP/KAT7/CCT4/CCT7/EIF2AK3/TCP1/FYN/RAN/CCT2/BAG3/CDK1/UBR5/PLK1/GLIS2/CCT5/CCT8/MAVS/SRC	27
GO:0031098	stress-activated protein kinase signaling cascade	66/2886	276/18862	0.000106925	0.0032738	0.00263949	DUSP9/MID1/TGFB2/DUSP10/TRAF3/CCDC88C/DACT1/MBIP/DUSP1/FBXW11/CASR/IRAK2/WNT5A/AKR1B1/MAP3K6/ZC3H12A/GADD45A/MAPK11/WNT7B/TAB1/PHLPP1/RIPK1/DAXX/VEGFA/SPHK1/KAT7/LGALS9/MAP2K3/UBB/PER1/MINK1/SERPINF2/PAK2/RPS27A/SH3RF3/SEMA4C/GRIK2/ROR2/DNAJA1/AMBP/TRAF1/UBC/MAP3K12/FOXM1/STRADB/PDCD4/BTRC/FAS/MYC/TRIB1/STK3/RIPK2/IKBKB/TLR3/NFKB1/EMC10/ZFP36/UBA52/GADD45B/CYLD/MAPK8IP3/ZNF622/FOXO1/BMP2/PLCB1/PA…	66
GO:1903825	organic acid transmembrane transport	42/2886	155/18862	0.000107714	0.0032738	0.00263949	ABCD1/SLC16A2/SLC38A5/MID1IP1/SLC7A8/SLC7A7/SLC29A4/THBS1/AQP9/RGS2/ABCD4/SFXN1/SLC23A1/SLC6A6/SLC38A3/PRKAG2/SLC2A1/CPT2/CPT1B/SLC16A3/SLC46A1/SLC47A1/SLC25A38/SLC3A1/SLC1A1/ACACB/SLC38A2/PER2/LRP2/ACSL5/SFXN3/ACSL1/SLC7A11/SLC1A5/AKT2/SLC7A6/SLC38A7/ABCC1/SLC6A18/SLC19A1/SLC23A2/SLC3A2	42
GO:0006695	cholesterol biosynthetic process	24/2886	72/18862	0.000108562	0.0032738	0.00263949	MBTPS2/LBR/INSIG1/DHCR24/PMVK/FDPS/SEC14L2/FASN/ACLY/ACAT2/RAN/ACACB/LPCAT3/GPAM/SCD/SQLE/FDFT1/MSMO1/MBTPS1/HMGCS1/SOD1/APOA4/TM7SF2/DHCR7	24
GO:1902653	secondary alcohol biosynthetic process	24/2886	72/18862	0.000108562	0.0032738	0.00263949	MBTPS2/LBR/INSIG1/DHCR24/PMVK/FDPS/SEC14L2/FASN/ACLY/ACAT2/RAN/ACACB/LPCAT3/GPAM/SCD/SQLE/FDFT1/MSMO1/MBTPS1/HMGCS1/SOD1/APOA4/TM7SF2/DHCR7	24
GO:0051091	positive regulation of DNA-binding transcription factor activity	64/2886	266/18862	0.000111727	0.00333043	0.00268515	MBTPS2/BUD31/ADAM8/AGT/DHX9/ESR2/TRIM52/TRIM41/NPM1/PPARG/IRAK2/WNT5A/SMO/FZD1/IL6/BCL10/DDR2/TAB1/TNFRSF11A/RIPK1/TRIM38/TRIM27/TRIM26/HSPA1A/HSPA1B/VEGFA/CARD14/JUP/HDAC5/FZD2/SPHK1/TRIM25/LGALS9/UBB/IL1RAP/ALK/RPS27A/IL18RAP/TRIM32/TRAF1/UBC/DDIT3/STK36/ATF2/NFKB2/PPRC1/STK3/MTDH/RIPK2/IKBKB/TLR3/NFKB1/CRTC1/UBA52/RGCC/ITGB2/MAVS/FZD4/RPS3/TRIM68/TRIM6/TRIM5/CAT/FOSL1	64
GO:0007249	I-kappaB kinase/NF-kappaB signaling	67/2886	282/18862	0.000116896	0.00345767	0.00278773	MAPKBP1/TRAF3/NFKBIA/TRIM52/SQSTM1/IRAK2/WNT5A/RHOA/ZC3H12A/MIER1/BCL10/S100A13/TAB1/LGALS1/HMOX1/VAPA/RIOK3/RIPK1/TRIM38/TRIM27/SECTM1/TBKBP1/NR1D1/TMEM101/TRIM25/LGALS9/UBB/PER1/PRKCE/RPS27A/REL/PELI1/SLC20A1/UFL1/FYN/GJA1/TNFAIP3/IRAK1BP1/TRIM32/TRAF1/UBC/NR1H4/TANK/BTRC/SIRT1/DDX21/OPTN/EEF1D/MTDH/RIPK2/IKBKB/TNFRSF10B/TLR3/ALPK1/ANKRD17/CARD8/RELB/BCL3/UBA52/CC2D1A/PLK2/MAVS/LIME1/BIRC3/TRIM…	67
GO:0015012	heparan sulfate proteoglycan biosynthetic process	12/2886	25/18862	0.000118384	0.003485	0.00280976	HS6ST2/GLCE/NDST1/EXTL2/XYLT2/HS3ST3B1/PXYLP1/HS3ST5/DSE/TCF7L2/NDST2/EXTL3	12
GO:0070301	cellular response to hydrogen peroxide	28/2886	90/18862	0.000119448	0.00349966	0.00282158	HDAC6/EZH2/IL6/RIPK1/SPHK1/RNF112/KDM6B/RHOB/IL18RAP/HDAC2/TNFAIP3/ANXA1/NR4A3/KLF4/TXN/PAWR/LRRK2/ANKZF1/SIRT1/PPIF/ZNF580/AXL/SMPD3/FOXO1/SRC/OSER1/ETS1/RPS3	28
GO:0045862	positive regulation of proteolysis	83/2886	367/18862	0.000120491	0.00351357	0.0028328	UBQLN2/DDX3X/MMP14/SMURF1/FIS1/CLDN4/ADAM8/SNX33/CTSH/PSME1/PRR7/F12/FGFR4/FBXW11/CSNK1A1/PPARG/CASP9/RNF19B/ZC3H12A/CDC20/PLK3/BCL10/NGF/GBA/IFI16/NCSTN/MAPK12/RNF185/TBC1D10A/PMAIP1/RIPK1/HSPA1A/HSPA1B/TTBK1/NGFR/OSBPL7/LGALS9/TRIB2/SOCS5/ANTXR1/EIF2AK3/BCL2L11/FYN/HDAC2/SLC1A1/ACER2/ANP32B/TNFSF15/TRIM32/CHFR/HIP1R/SART3/LRRK2/LPCAT3/HSPD1/PSMD14/TANK/BTRC/FAS/SIRT1/MYC/TRIB1/RIPK2/TNFRSF10B/D…	83
GO:1905477	positive regulation of protein localization to membrane	36/2886	127/18862	0.00012186	0.00353679	0.00285152	CNPY4/FIS1/CEMIP/CNST/ATP2B4/TP53BP2/SQSTM1/TP73/EPHA2/EPHB2/PDZK1/PMAIP1/BCL2/ERBB2/ITGA3/CDK5R1/MIEF2/TFDP2/PRKCE/SPTBN1/FYN/LRP1/C2CD5/VIL1/SORBS1/ANK3/KIF5B/YWHAZ/BBC3/AKT2/PDCD5/ITGB2/SLC5A3/E2F1/PAK1/ZDHHC5	36
GO:0007409	axonogenesis	100/2886	460/18862	0.000129503	0.00372367	0.00300219	PLXNA3/PLXNB3/EFNB1/HDAC6/USP9X/SEMA4B/CRMP1/SLIT2/SEMA7A/ENAH/HSP90AA1/FLRT2/NUMB/NIN/EFNA5/ROBO2/PLXNA1/PLXND1/WNT5A/SEMA3B/RHOA/LAMB2/PLXNB1/SMO/SEMA3C/HOXA2/PIK3CD/EPHA2/EPHB2/MACF1/ARTN/NGF/SEMA6C/CHRNB2/IGSF9/RTN4R/CDH2/BCL2/RANBP9/KIAA0319/VEGFA/HSP90AB1/BAIAP2/NGFR/ERBB2/GRB7/WNT3/NOG/CDK5R1/PAK2/SKIL/DPYSL5/SPTBN1/B3GNT2/DOK1/SEMA4C/NR2E1/FYN/PTCH1/TMEFF1/ANAPC2/ULK1/TCTN1/NTN4/FRS2/LRP1…	100
GO:2000027	regulation of animal organ morphogenesis	46/2886	176/18862	0.000132917	0.00378659	0.00305292	GPC3/SMURF1/MSX1/AGT/SIX4/DAAM1/DACT1/PSME1/ROBO2/PSMD6/WNT5A/RHOA/SMO/FZD1/CELSR2/CSF1/WNT2B/CELSR1/VEGFA/PKHD1/NGFR/PSMD3/FZD2/PSMC5/NOG/PSMD2/PAX8/RSPO3/AHI1/ROR2/NTN4/FRS2/PSMD14/DKK1/BMPR1A/FZD6/PLEKHA4/PARD6A/DAB2/TIAM1/SPEF1/BMP2/PSMA7/FZD4/LGR4/PSMC3	46
GO:0006405	RNA export from nucleus	39/2886	142/18862	0.000136791	0.00386138	0.00311322	CPSF4/DHX9/NRDE2/NPM1/SETD2/NUP205/HNRNPA2B1/SRRM1/SRSF11/NUP153/DDX39B/SRSF3/ALYREF/EIF4A3/SRSF1/SUPT6H/EIF5A/CPSF3/SRSF7/XPO1/RANBP2/TSC1/RAN/IWS1/WDR33/RRS1/ABCE1/SDAD1/YTHDC1/DDX39A/RPS15/SMG1/RNPS1/NUP155/U2AF1/NXT1/NUP98/NUP160/NXF1	39
GO:0015804	neutral amino acid transport	17/2886	44/18862	0.000142234	0.00399679	0.00322239	SLC38A5/SLC7A8/RGS2/SFXN1/SLC6A6/SLC38A3/NFKBIE/LLGL2/CTNS/SLC25A38/SLC3A1/SLC1A1/SLC38A2/SFXN3/SLC1A5/SLC38A7/SLC3A2	17
GO:0034312	diol biosynthetic process	11/2886	22/18862	0.000143987	0.00400959	0.00323272	SPTLC2/GCH1/GBA/SPHK1/SPR/SPTLC1/ACER2/ABCA2/PCBD1/ASAH1/SPTLC3	11
GO:0071158	positive regulation of cell cycle arrest	26/2886	82/18862	0.000145923	0.00404526	0.00326147	FOXO4/BTG2/CDC25C/CNOT4/TP73/ZBTB17/PLK3/GADD45A/MUC1/RPL23/CDK5R1/RNF112/RPL26/TFDP2/HMGA2/CDK1/ARID3A/CNOT1/RBL2/CCNB1/PLK2/POU4F1/RGCC/E2F1/AURKA/ATM	26
GO:0043153	entrainment of circadian clock by photoperiod	13/2886	29/18862	0.000147909	0.00405184	0.00326678	PDE6B/FBXL17/BHLHE40/PER3/PER1/PPP1CB/CRY1/PER2/CRTC1/NR2F6/SIK1/USP2/RBM4B	13
GO:0031109	microtubule polymerization or depolymerization	33/2886	114/18862	0.000148408	0.00405184	0.00326678	HDAC6/MID1IP1/TUBGCP5/CCSAP/CAMSAP2/NIN/KIF2C/TUBGCP6/INPP5J/RANBP9/HSPA1A/HSPA1B/CCDC57/TUBG1/CDK5R1/CLASP2/CLIP1/TRPV4/NAV3/FKBP4/APC2/MAP1B/OCLN/KIF2A/SKA3/DYRK1A/TPX2/SPEF1/STMN3/PAK1/RPS3/KIF18A/CKAP5	33
GO:0050769	positive regulation of neurogenesis	54/2886	217/18862	0.000148782	0.00405184	0.00326678	PLXNA3/PLXNB3/SRRT/SLIT2/SEMA7A/NUMB/HIF1A/NIN/ROBO2/PLXNA1/PLXND1/PPARG/RHOA/PLXNB1/RHEB/SMO/IL6/CAMK2B/TP73/SPEN/EPHB2/MACF1/NGF/CUL7/TTBK1/VEGFA/NGFR/WNT3/RNF112/ASPA/HES1/SKIL/UFL1/HDAC2/TRIM32/ANAPC2/NAP1L1/LRP1/OBSL1/XRCC5/LRP2/ZFYVE27/EGR2/VEGFC/MEGF8/FBXO31/MAP1B/TIAM1/E2F1/BMP2/PAK1/MAP6/RASSF10/CLCF1	54
GO:1901653	cellular response to peptide	87/2886	391/18862	0.00015183	0.00408595	0.00329428	LDOC1/FOXO4/PRKAR1B/BAIAP2L1/SH2B2/CPEB2/KLF3/PKM/MAX/TRIM41/ADRB2/ATP6V1A/CASR/PPARG/INSIG1/ATP6V0A4/AKR1B1/PRKAR2B/ERRFI1/SLC25A33/AGTRAP/WDTC1/BCAR3/RANGAP1/PTPN2/CDC5L/BAIAP2/NGFR/PIP4K2B/RPL23/CDC6/HDAC5/PDK2/STXBP4/BRIP1/KLF11/BCL2L11/FYN/GJA1/PHIP/KANK1/NR4A3/KLF4/SLC27A4/TSC1/APPL2/NR1H4/SOCS2/LRP1/STAT6/NR4A1/ADCY6/C2CD5/CAPN10/ITGA4/GRB14/NR4A2/SORBS1/SIRT1/EIF4EBP2/VIM/ECHDC3/GPT/KLF10…	87
GO:0032329	serine transport	7/2886	10/18862	0.000152439	0.00408595	0.00329428	SLC38A5/SFXN1/NFKBIE/SLC38A2/SFXN3/SLC1A5/SLC38A7	7
GO:0007179	transforming growth factor beta receptor signaling pathway	51/2886	202/18862	0.000152678	0.00408595	0.00329428	USP9X/SMURF1/THBS1/SMAD6/TGFB2/TGFB3/FERMT2/SMAD5/LOX/NREP/RHOA/ZYX/JUN/TAB1/ONECUT2/HSPA1A/HSP90AB1/ZNF451/CD109/ITGA3/MTMR4/UBB/VEPH1/SKIL/EMILIN1/RPS27A/SPRED2/HSPA5/ENG/UBC/APPL2/CHST11/LEMD3/USP15/SIRT1/BMPR1A/PARD3/FOXH1/ING2/LTBP4/UBA52/GDF15/ARHGEF18/PARD6A/TGFB1I1/VASN/DAB2/LATS2/SRC/SLC2A10/PMEPA1	51
GO:0016126	sterol biosynthetic process	25/2886	78/18862	0.000160419	0.00427261	0.00344478	MBTPS2/LBR/INSIG1/PRKAG2/DHCR24/PMVK/FDPS/SEC14L2/FASN/ACLY/ACAT2/RAN/ACACB/LPCAT3/GPAM/SCD/SQLE/FDFT1/MSMO1/MBTPS1/HMGCS1/SOD1/APOA4/TM7SF2/DHCR7	25
GO:0090307	mitotic spindle assembly	22/2886	65/18862	0.000161035	0.00427261	0.00344478	KIF4A/PRC1/KIF23/CCSAP/NEK2/SPICE1/RHOA/CDC20/HSPA1A/HSPA1B/AURKB/CLASP2/RACGAP1/KIFC2/CHMP2A/CCDC61/PLK1/KIF2A/PIBF1/KIF3B/TPX2/MYBL2	22
GO:0006029	proteoglycan metabolic process	27/2886	87/18862	0.000164123	0.00431747	0.00348094	HS6ST2/IDUA/GLCE/NDST1/HYAL1/CHPF2/EXTL2/BCAN/SGSH/XYLT2/HS3ST3B1/PXYLP1/CHST10/HS3ST5/DSE/CHST11/GPC1/CHPF/TCF7L2/SPOCK2/NDST2/EXTL3/SPOCK3/VCAN/ARSB/BMP2/SLC2A10	27
GO:0150104	transport across blood-brain barrier	27/2886	87/18862	0.000164123	0.00431747	0.00348094	SLC16A2/SLC38A5/SLC7A8/SLC29A4/ATP2B4/SLC6A6/SLC38A3/MFSD2A/SLC2A1/LEPR/ATP1A4/ABCC3/SLC1A1/SLC27A4/ABCA2/LRP1/SLC38A2/LRP2/FABP5/SLC1A5/LRP3/INSR/ABCC1/SLC19A1/SLC5A3/SLC2A10/SLC22A8	27
GO:0030111	regulation of Wnt signaling pathway	82/2886	365/18862	0.000166369	0.00434221	0.00350089	GPC3/DDX3X/CHD8/CCDC88C/DACT1/PSME1/CSNK1A1/EGR1/PPP2CA/VGLL4/PSMD6/WNT5A/LIMD1/CDK14/HECW1/MACF1/RNF220/TRABD2B/KREMEN1/CDH2/DCDC2/PSMD3/JUP/WNT3/PSMC5/AXIN2/ITGA3/NOG/NXN/IFT80/SOX2/PSMD2/SNX3/RSPO3/TNFAIP3/WNK2/ROR2/SPIN1/KANK1/INVS/NRARP/SCYL2/DDIT3/GLI1/LRP1/LRRK2/CUL3/FRZB/PSMD14/ZRANB1/TCF7L2/BTRC/DKK1/JRK/FZD6/UBR5/STK3/JADE1/NFKB1/TRPM4/PLEKHA4/DAPK3/APC2/CYLD/ZBED3/DEPDC1B/DAB2/SHISA2/L…	82
GO:0090671	telomerase RNA localization to Cajal body	10/2886	19/18862	0.000168575	0.00434221	0.00350089	CCT6A/EXOSC10/CCT3/CCT4/CCT7/TCP1/CCT2/PARN/CCT5/CCT8	10
GO:0032147	activation of protein kinase activity	75/2886	328/18862	0.000174547	0.00447739	0.00360988	DUSP9/PRKAR1B/DGKQ/THBS1/RPLP1/AGT/ADORA1/TGFB2/TGFB3/ADRB2/PRRC1/EFNA5/RAF1/IRAK2/WNT5A/PRKAG2/PRKAR2B/TP73/MAP3K6/GADD45A/NGF/PEA15/MAPK11/PRR5/TAB1/RIPK1/DAXX/VEGFA/CARD14/STRADA/GPRC5C/CD300A/CDK5R1/MAP2K3/UBB/MINK1/PAK2/SPDYA/ALK/RPS27A/TXN/TNFSF15/UBC/DUSP6/FRS2/MAP3K12/ADCY6/LRRK2/GPRC5D/STRADB/DUSP5/AVPI1/CDK1/STK3/RIPK2/TNFRSF10B/TLR3/UBA52/GDF15/INSR/GADD45B/SOCS1/ADCY9/MAPK8IP3/GHR/PRL…	75
GO:0031145	anaphase-promoting complex-dependent catabolic process	26/2886	83/18862	0.000181916	0.00462799	0.0037313	PSME1/CDC23/PSMD6/CDC20/PSMD3/CDC27/PSMC5/UBB/AURKB/PSMD2/RPS27A/ANAPC2/UBC/CUL3/PSMD14/CDK1/ANAPC16/UBE2S/UBA52/FBXO31/PLK1/CCNB1/CDC20B/AURKA/PSMA7/PSMC3	26
GO:0032239	regulation of nucleobase-containing compound transport	9/2886	16/18862	0.000185969	0.00471172	0.0037988	DHX9/ADORA1/NRDE2/SETD2/RSC1A1/RIPK1/NUP153/SUPT6H/IWS1	9
GO:0001706	endoderm formation	19/2886	53/18862	0.000189041	0.0047197	0.00380524	MMP14/DUSP1/COL8A1/SETD2/LAMB1/INHBA/COL12A1/NOG/SOX2/HMGA2/ITGA4/DUSP5/DKK1/DUSP4/PAF1/COL4A2/COL6A1/ITGB2/CTR9	19
GO:0000188	inactivation of MAPK activity	12/2886	26/18862	0.000189338	0.0047197	0.00380524	DUSP9/DUSP10/DUSP1/PPP2CA/DUSP18/DUSP14/SPRED2/DUSP6/DUSP16/DUSP5/DUSP4/DUSP8	12
GO:0000281	mitotic cytokinesis	23/2886	70/18862	0.000191226	0.00474761	0.00382774	KIF4A/KIF23/BBS4/SNX33/TRIM36/RHOA/ANLN/JTB/CUL7/EFHC1/CHMP6/TTC19/RHOB/CENPA/SPTBN1/RTKN/RACGAP1/CEP55/KIF20B/ANK3/CHMP2A/PLK1/INCENP	23
GO:1905039	carboxylic acid transmembrane transport	41/2886	154/18862	0.000195704	0.00483938	0.00390173	ABCD1/SLC16A2/SLC38A5/MID1IP1/SLC7A8/SLC7A7/THBS1/AQP9/RGS2/ABCD4/SFXN1/SLC23A1/SLC6A6/SLC38A3/PRKAG2/SLC2A1/CPT2/CPT1B/SLC16A3/SLC46A1/SLC47A1/SLC25A38/SLC3A1/SLC1A1/ACACB/SLC38A2/PER2/LRP2/ACSL5/SFXN3/ACSL1/SLC7A11/SLC1A5/AKT2/SLC7A6/SLC38A7/ABCC1/SLC6A18/SLC19A1/SLC23A2/SLC3A2	41
GO:0032204	regulation of telomere maintenance	25/2886	79/18862	0.000200975	0.00490775	0.00395685	HDAC8/HNRNPC/NEK2/YLPM1/GNL3/HNRNPA2B1/CCT6A/EXOSC10/CCT3/PPP1R10/AURKB/CCT4/CCT7/TCP1/CCT2/XRCC5/MYC/HNRNPD/SMG1/PARN/CCT5/CCT8/SRC/ATM/NAT10	25
GO:1900034	regulation of cellular response to heat	25/2886	79/18862	0.000200975	0.00490775	0.00395685	IER5/HSP90AA1/NUP205/CAMK2B/NUP153/HSPA1L/HSPA1A/HSPA1B/HSP90AB1/RANBP2/BAG1/HSPB8/PTGES3/FKBP4/BAG3/SIRT1/CAMK2G/DNAJB1/NUP155/HSPH1/HSPA8/ATM/CHORDC1/NUP98/NUP160	25
GO:1903959	regulation of anion transmembrane transport	32/2886	111/18862	0.000201645	0.00490775	0.00395685	GPC3/MEF2A/THBS1/RNASEL/RGS2/SLC34A1/PRKAG2/RSC1A1/SLC2A1/PEA15/RIPK1/SLC25A27/STXBP4/NR4A3/APPL2/C2CD5/CREBL2/ADIPOR2/CAPN10/PER2/ACSL5/SORBS1/AZIN1/CA2/FABP5/ACSL1/RTN2/AKT2/INSR/C3/OCLN/TRIB3	32
GO:0007369	gastrulation	46/2886	179/18862	0.000203007	0.00492154	0.00396797	GPC3/MMP14/DUSP1/COL8A1/WNT5A/SETD2/EXOC4/LAMB1/INHBA/ZBTB17/EPHA2/TAL1/FOXC1/COL12A1/WNT3/ITGB4/ITGA3/NOG/KDM6B/CLASP2/SOX2/ATOH8/GJA1/RPS6/NR4A3/KLF4/TXNRD1/FRS2/HMGA2/CUL3/ITGA4/DUSP5/DKK1/BMPR1A/DUSP4/MEGF8/PAF1/ITGA2/COL4A2/COL6A1/ITGB2/TGIF2/HNF4A/PHLDB1/CTR9/APLNR	46
GO:0001933	negative regulation of protein phosphorylation	81/2886	362/18862	0.00020832	0.0050306	0.0040559	DUSP9/NR2F2/PRKAR1B/DGKQ/SLIT2/SMAD6/AGT/RGS2/PPP1R15B/DUSP10/BDKRB1/BDKRB2/DUSP1/NPM1/SPRY4/PPP2CA/PARP14/PRKAG2/PRKAR2B/IGFBP3/ERRFI1/EPHB2/ZC3H12A/CDKN2C/GADD45A/ADAR/GBA/INPP5J/DUSP18/PTPN2/TRIM27/STK38/CD109/CHMP6/HEXIM2/CD300A/NOG/DUSP14/PAK2/SH3BP5/EIF4G1/CTDSPL/TRIB2/EMILIN1/SOCS5/SPRED2/CNKSR3/TNFAIP3/DNAJA1/ENG/DUSP6/LRRK2/DUSP16/PDCD4/DUSP5/ITPRIP/DKK1/SIRT1/DDIT4/PARD3/TRIB1/DEPTOR/DU…	81
GO:0007411	axon guidance	65/2886	277/18862	0.000213362	0.00511243	0.00412187	PLXNA3/PLXNB3/EFNB1/SEMA4B/CRMP1/SLIT2/SEMA7A/ENAH/FLRT2/EFNA5/ROBO2/PLXNA1/PLXND1/WNT5A/SEMA3B/LAMB2/PLXNB1/SMO/SEMA3C/HOXA2/PIK3CD/EPHA2/EPHB2/ARTN/SEMA6C/IGSF9/RANBP9/VEGFA/NGFR/ERBB2/GRB7/WNT3/NOG/CDK5R1/DPYSL5/SPTBN1/B3GNT2/DOK1/SEMA4C/FYN/PTCH1/TMEFF1/NTN4/FRS2/LRP1/GPC1/GBX2/TBR1/GFRA1/EGR2/KIF5B/DPYSL2/PALLD/VASP/MEGF8/SPTBN4/ZSWIM4/DOK4/FOXD1/ZSWIM6/TRIO/EFNB2/SRC/YTHDF1/ROBO3	65
GO:0043484	regulation of RNA splicing	39/2886	145/18862	0.000220182	0.00525547	0.0042372	PRDX6/CLK4/SRPK2/TRA2A/HNRNPA2B1/RBMXL1/PTBP2/RBM15/HSPA1A/SRSF3/RBFOX3/DDX5/JMJD6/C1QBP/FXR1/TRA2B/SRSF7/QKI/WTAP/HABP4/HNRNPK/SFSWAP/ZC3H10/TMBIM6/SLC38A2/NCL/CLK1/CWC22/HNRNPH3/PUF60/KHDRBS3/YTHDC1/NOVA2/PTBP1/RNPS1/DYRK1A/RBM39/HSPA8/NUP98	39
GO:0072332	intrinsic apoptotic signaling pathway by p53 class mediator	24/2886	75/18862	0.000221189	0.00525919	0.0042402	AEN/MSX1/TP53BP2/BDKRB2/HINT1/TP73/RPL11/MUC1/IFI16/PMAIP1/BCL2/DDX5/PDK2/UBB/RPL26/RPS7/HNRNPK/TOPORS/SIRT1/DDIT4/ING2/BCL3/POU4F1/E2F1	24
GO:0071103	DNA conformation change	79/2886	352/18862	0.000224128	0.00528839	0.00426374	TSPYL2/DDX3X/CHD8/CHD2/MCM7/NCAPG/CDAN1/CENPL/DHX9/NRDE2/MIS18BP1/NPM1/CHD1/XPC/NCAPG2/HNRNPA2B1/CHD5/PHF13/HFM1/XRCC6/TOP3B/SMCHD1/GTF2H4/BRD2/DAXX/HMGA1/TOP2A/EZH1/RECQL5/BRIP1/CENPV/UBB/SMC4/DNMT3A/CENPA/RPS27A/NCAPH/ASCC3/TSPYL1/CENPW/SHPRH/ANXA1/ANP32B/UBC/SART3/NAP1L1/HMGA2/PPHLN1/CHD4/XRCC5/HAT1/SIRT1/SUPV3L1/PARP10/RAD54B/CHD7/MCM4/KAT6A/CENPU/HMGB2/HELQ/LIN54/PAF1/SIRT2/UBA52/DNMT1/CHAF1…	79
GO:0097193	intrinsic apoptotic signaling pathway	66/2886	283/18862	0.000230891	0.00542726	0.0043757	DDX3X/AEN/FIS1/STYXL1/MSX1/BMF/CHAC1/TP53BP2/BDKRB2/SGPP1/HIF1A/HINT1/ITPR1/TP73/CASP9/EPHA2/RPL11/MUC1/IFI16/ATF4/HMOX1/PTPN2/PMAIP1/BCL2/HSPA1A/DDX5/PDK2/UBB/RPL26/SKIL/RPS7/EIF2AK3/BCL2L11/CD24/HNRNPK/TOPORS/DNAJA1/TRIM32/DDIT3/TMBIM6/LRRK2/CUL3/SCN2A/SIRT1/DDIT4/PPIF/TNFRSF10B/ING2/FBXW7/BBC3/BCL3/PLAUR/TMEM161A/CDKN2D/CYLD/ZNF622/POU4F1/TPT1/SOD1/E2F1/TRIB3/SRC/SERINC3/ATM/RPS3/USP47	66
GO:0097485	neuron projection guidance	65/2886	278/18862	0.000237594	0.00555004	0.00447469	PLXNA3/PLXNB3/EFNB1/SEMA4B/CRMP1/SLIT2/SEMA7A/ENAH/FLRT2/EFNA5/ROBO2/PLXNA1/PLXND1/WNT5A/SEMA3B/LAMB2/PLXNB1/SMO/SEMA3C/HOXA2/PIK3CD/EPHA2/EPHB2/ARTN/SEMA6C/IGSF9/RANBP9/VEGFA/NGFR/ERBB2/GRB7/WNT3/NOG/CDK5R1/DPYSL5/SPTBN1/B3GNT2/DOK1/SEMA4C/FYN/PTCH1/TMEFF1/NTN4/FRS2/LRP1/GPC1/GBX2/TBR1/GFRA1/EGR2/KIF5B/DPYSL2/PALLD/VASP/MEGF8/SPTBN4/ZSWIM4/DOK4/FOXD1/ZSWIM6/TRIO/EFNB2/SRC/YTHDF1/ROBO3	65
GO:0008645	hexose transmembrane transport	32/2886	112/18862	0.000241459	0.00561165	0.00452437	GPC3/MEF2A/RNASEL/SLC45A3/PRKAG2/RSC1A1/SLC2A1/SLC5A9/PEA15/SLC2A11/SLC25A27/STXBP4/SLC2A2/NR4A3/SLC27A4/TSC1/HNF1A/APPL2/C2CD5/CREBL2/ADIPOR2/CAPN10/SORBS1/FABP5/RTN2/AKT2/INSR/C3/OCLN/SLC5A3/TRIB3/SLC2A10	32
GO:0051052	regulation of DNA metabolic process	79/2886	353/18862	0.000246256	0.00570171	0.00459698	HDAC8/USP51/USP9X/KLHL15/HNRNPC/ZCWPW1/TNFSF4/DHX9/NEK2/HSP90AA1/YLPM1/FGFR4/UIMC1/DUSP1/NPM1/PARP9/DTX3L/PPARG/GNL3/SETD2/PAXIP1/IL6/HNRNPA2B1/CCT6A/EXOSC10/RLF/USP1/CCT3/SMCHD1/PPP1R10/DDX39B/HSP90AB1/ALYREF/POLG2/AXIN2/KPNA2/RECQL5/KAT7/SUPT6H/AURKB/TNFSF13/BCL6/CCT4/CCT7/TCP1/GJA1/KLF4/CCT2/HMGA2/PTGES3/FOXM1/TRIP12/XRCC5/ANKRD1/SIRT1/MYC/UBR5/OTUD4/HNRNPD/PARM1/PRKCG/TMEM161A/WDR18/SH2B1/SMG…	79
GO:0043434	response to peptide hormone	94/2886	435/18862	0.000252893	0.00581184	0.00468577	UPRT/FOXO4/PHEX/PRKAR1B/BAIAP2L1/VGF/SH2B2/CPEB2/PKM/CACYBP/BTG2/MAX/SLC34A1/SPARC/EGR1/ATP6V1A/PPARG/INSIG1/ATP6V0A4/PRKAR2B/GNAI1/ERRFI1/SLC25A33/AGTRAP/WDTC1/SLC2A1/BCAR3/RANGAP1/PTPN2/CDC5L/BAIAP2/PIP4K2B/CDC6/HDAC5/PDK2/NME2/STXBP4/BRIP1/EIF2B5/KHK/FYN/GJA1/PHIP/ANXA1/KANK1/NR4A3/SLC27A4/TSC1/EIF2B1/CRY1/APPL2/NR1H4/SOCS2/STAT6/STAT2/NR4A1/ADCY6/C2CD5/CAPN10/PTPRN/IGFBP5/GRB14/NR4A2/SORBS1/E…	94
GO:0051962	positive regulation of nervous system development	62/2886	263/18862	0.000257952	0.00590614	0.0047618	PLXNA3/PLXNB3/SRPX2/SRRT/SLIT2/SEMA7A/FLRT2/NUMB/HIF1A/NIN/ROBO2/PLXNA1/PLXND1/PPARG/RHOA/PLXNB1/RHEB/SMO/IL6/CAMK2B/AGRN/TP73/SPEN/EPHB2/MACF1/NGF/CUL7/TTBK1/VEGFA/NGFR/WNT3/RNF112/ASPA/HES1/IL1RAP/SKIL/NLGN1/UFL1/HDAC2/TPBG/TRIM32/ANAPC2/NAP1L1/LRP1/CLSTN3/OBSL1/XRCC5/LRP2/ZFYVE27/EGR2/VEGFC/MEGF8/FBXO31/MAP1B/SLITRK5/TIAM1/E2F1/BMP2/PAK1/MAP6/RASSF10/CLCF1	62
GO:0072595	maintenance of protein localization in organelle	16/2886	42/18862	0.000268673	0.00612892	0.00494142	BBS4/INSIG1/ANKRD13C/RANGAP1/CHCHD10/SYNE1/GJA1/TOPORS/TXN/HSPA5/OS9/HK1/TAF3/BCL3/GRIK5/MORC3	16
GO:0010977	negative regulation of neuron projection development	36/2886	132/18862	0.000281482	0.00637408	0.00513908	PLXNA3/SEMA4B/CRMP1/SEMA7A/RAB29/SPOCK1/WNT5A/SEMA3B/RHOA/SEMA3C/EPHB2/SEMA6C/LGALS1/INPP5J/KREMEN1/RTN4R/KIAA0319/NGFR/WNT3/CDK5R1/NLGN1/SEMA4C/HDAC2/KANK1/TSC1/TRPV4/LRP1/DIP2B/ADCY6/LRRK2/FKBP4/ITM2C/VIM/EFNB2/TSKU/DENND5A	36
GO:1904951	positive regulation of establishment of protein localization	74/2886	328/18862	0.00029504	0.00660847	0.00532805	ACSL4/ACHE/FIS1/ADAM8/CTDSPL2/CEMIP/CNST/SEC16B/RAB29/TGFB2/TP53BP2/TGFB3/HIF1A/CASR/SMO/CCT6A/UBE2J2/TP73/ATP13A2/ZC3H12A/PLK3/PDZK1/CCT3/PMAIP1/BCL2/HSPA1L/HSP90AB1/USP36/ERBB2/JUP/CDK5R1/MIEF2/TFDP2/PRKCE/CCT4/CCT7/TCP1/FYN/GJA1/ANP32B/RAN/NR1H4/CEP290/CCT2/LRP1/C2CD5/CAPN10/BAG3/TCF7L2/ANKRD1/KIF20B/ANK3/KIF5B/UBR5/YWHAZ/VEGFC/FBXW7/CEP135/TRPM4/BBC3/AKT2/PDCD5/PARD6A/OXCT1/CCT5/GAS6/XPO4/ITG…	74
GO:0015909	long-chain fatty acid transport	23/2886	72/18862	0.000305162	0.0068105	0.00549094	ABCD1/MID1IP1/THBS1/SLC27A2/BDKRB2/ABCD4/PPARG/PRKAG2/MFSD2A/SLC2A1/CPT2/CPT1B/PROCA1/ANXA1/SLC27A4/ACACB/PLA2R1/ACSL5/FABP5/ACSL1/PLA2G12A/AKT2/DRD4	23
GO:0001959	regulation of cytokine-mediated signaling pathway	45/2886	177/18862	0.000306294	0.0068112	0.0054915	SLIT2/SPPL2A/RNASEL/HIF1A/PARP9/PARP14/PPARG/IRAK2/WNT5A/IL6/CSF1/ADAR/PTPN2/RIPK1/HSPA1A/HSPA1B/HSP90AB1/SPHK1/PXDN/IL1R2/CD24/TNFAIP3/TRIM32/TRAF1/AGPAT2/NR1H4/RIPK2/IL7/IKBKB/OTUD4/ABCE1/CARD8/AXL/CDC37/SPPL2B/CYLD/SOCS1/GAS6/RUNX1/MAVS/SPATA2/BIRC3/TRIM6/NR1H3/SIGIRR	45
GO:1904659	glucose transmembrane transport	31/2886	109/18862	0.000327456	0.00720404	0.00580822	GPC3/MEF2A/RNASEL/PRKAG2/RSC1A1/SLC2A1/SLC5A9/PEA15/SLC2A11/SLC25A27/STXBP4/SLC2A2/NR4A3/SLC27A4/TSC1/HNF1A/APPL2/C2CD5/CREBL2/ADIPOR2/CAPN10/SORBS1/FABP5/RTN2/AKT2/INSR/C3/OCLN/SLC5A3/TRIB3/SLC2A10	31
GO:0006625	protein targeting to peroxisome	22/2886	68/18862	0.000334747	0.00728663	0.00587481	USP9X/SLC27A2/ACOX2/CROT/PEX1/PEX10/PEX14/HMGCL/HAO2/PEX19/ECI2/PEX6/UBB/RPS27A/UBC/IDH1/PHYH/PEX2/EPHX2/UBA52/AMACR/CAT	22
GO:0072662	protein localization to peroxisome	22/2886	68/18862	0.000334747	0.00728663	0.00587481	USP9X/SLC27A2/ACOX2/CROT/PEX1/PEX10/PEX14/HMGCL/HAO2/PEX19/ECI2/PEX6/UBB/RPS27A/UBC/IDH1/PHYH/PEX2/EPHX2/UBA52/AMACR/CAT	22
GO:0072663	establishment of protein localization to peroxisome	22/2886	68/18862	0.000334747	0.00728663	0.00587481	USP9X/SLC27A2/ACOX2/CROT/PEX1/PEX10/PEX14/HMGCL/HAO2/PEX19/ECI2/PEX6/UBB/RPS27A/UBC/IDH1/PHYH/PEX2/EPHX2/UBA52/AMACR/CAT	22
GO:0021756	striatum development	9/2886	17/18862	0.000341546	0.00738086	0.00595079	HPRT1/BBS4/FOXP2/INHBA/LRRK2/SLC7A11/BBS2/ZSWIM6/SLITRK5	9
GO:0051225	spindle assembly	32/2886	114/18862	0.000342657	0.00738086	0.00595079	KIF4A/HAUS4/PRC1/TUBGCP5/KIF23/CCSAP/NEK2/DYNC1H1/CCDC69/SPICE1/RHOA/CDC20/TUBGCP6/TUBB/HSPA1A/HSPA1B/SPAG5/AURKB/CLASP2/RACGAP1/KIFC2/CHMP2A/CCDC61/PLK1/KIF2A/PIBF1/KIF3B/TPX2/MYBL2/AURKA/RPS3/INCENP	32
GO:1902749	regulation of cell cycle G2/M phase transition	53/2886	219/18862	0.000356502	0.00758223	0.00611314	FOXO4/HAUS4/PBX1/DYRK3/NEK2/CENPF/HSP90AA1/DYNC1H1/HSPA2/PSME1/UIMC1/NPM1/HMMR/CDC25C/PSMD6/PAXIP1/CEP41/PRKAR2B/HUS1/MIIP/ORC1/CDC7/CEP76/TUBB/PSMD3/CDC6/TUBG1/PSMC5/AURKB/NEK10/CEP70/PSMD2/SSNA1/CEP290/HMGA2/NABP1/PSMD14/CDK1/RAD21/PLK4/CEP135/ATF5/PLK1/CCNB1/CEP250/TPX2/AURKA/PSMA7/CEP164/ATM/USP47/CKAP5/PSMC3	53
GO:1903053	regulation of extracellular matrix organization	17/2886	47/18862	0.000359624	0.00761369	0.00613851	AGT/FGFR4/IL6/AEBP1/DDR2/ADTRP/CLASP2/EMILIN1/ANTXR1/LRP1/DPP4/RGCC/RUNX1/BMP2/SLC2A10/ETS1/PHLDB1	17
GO:0090481	pyrimidine nucleotide-sugar transmembrane transport	7/2886	11/18862	0.000363614	0.00767188	0.00618542	SLC35A4/SLC35A5/SLC35B4/SLC35D1/SLC35A3/SLC35B1/SLC35A1	7
GO:0042255	ribosome assembly	21/2886	64/18862	0.000365242	0.00768002	0.00619198	DDX3X/NPM1/RPS14/DHX30/RPL11/RPL5/RPS27/RPS10/RPL38/C1QBP/RPSA/DHX37/RPLP0/RPL6/NOP2/XRCC5/RRS1/RPS5/RPS19/RPS15/BRIX1	21
GO:0051403	stress-activated MAPK cascade	61/2886	261/18862	0.00036702	0.00769124	0.00620103	DUSP9/MID1/TGFB2/DUSP10/TRAF3/DACT1/MBIP/DUSP1/FBXW11/CASR/IRAK2/WNT5A/MAP3K6/ZC3H12A/GADD45A/MAPK11/WNT7B/TAB1/PHLPP1/RIPK1/DAXX/VEGFA/SPHK1/LGALS9/MAP2K3/UBB/PER1/MINK1/SERPINF2/RPS27A/SH3RF3/SEMA4C/GRIK2/ROR2/DNAJA1/AMBP/TRAF1/UBC/MAP3K12/FOXM1/STRADB/PDCD4/BTRC/FAS/MYC/TRIB1/STK3/RIPK2/IKBKB/TLR3/NFKB1/EMC10/ZFP36/UBA52/GADD45B/CYLD/MAPK8IP3/ZNF622/FOXO1/BMP2/PLCB1	61
GO:1903321	negative regulation of protein modification by small protein conjugation or removal	27/2886	91/18862	0.000370813	0.00774448	0.00624396	HDAC8/SQSTM1/PRR7/DTX3L/ISG15/RPL11/RPL5/HSPA1A/HSPA1B/RPL23/NXN/RPS7/PRKCE/UFL1/FYN/TNFAIP3/DNAJA1/CRY1/PER2/TRIP12/GTPBP4/PARP10/UBR5/PRKCG/RPS3/PRMT3/UBXN1	27
GO:0046512	sphingosine biosynthetic process	8/2886	14/18862	0.000374719	0.00774754	0.00624642	SPTLC2/GBA/SPHK1/SPTLC1/ACER2/ABCA2/ASAH1/SPTLC3	8
GO:0046520	sphingoid biosynthetic process	8/2886	14/18862	0.000374719	0.00774754	0.00624642	SPTLC2/GBA/SPHK1/SPTLC1/ACER2/ABCA2/ASAH1/SPTLC3	8
GO:1990173	protein localization to nucleoplasm	8/2886	14/18862	0.000374719	0.00774754	0.00624642	CCT6A/CCT3/CCT4/CCT7/TCP1/CCT2/CCT5/CCT8	8
GO:0007098	centrosome cycle	35/2886	129/18862	0.00037754	0.00777983	0.00627246	HAUS4/BBS4/NEK2/NIN/NPM1/SPICE1/CROCC/STIL/GADD45A/RANBP1/CEP76/RTTN/PKHD1/CCDC57/CEP68/PPP1R12A/CDK1/SIRT1/TMEM67/UBXN2B/PLK4/CEP135/CHMP2A/ATF5/PARD6A/PLK1/PLK2/CEP250/KIF3B/AURKA/CHORDC1/UVRAG/C2CD3/NAT10/CKAP5	35
GO:0043401	steroid hormone mediated signaling pathway	36/2886	134/18862	0.000385761	0.00791689	0.00638296	HDAC6/TRIP4/ESRRG/ESR2/NR3C1/ARID1A/HEYL/DAXX/NR1D1/DDX5/PER1/UFL1/NR2E1/DNAJA1/NR4A3/CRY1/CALCOCO1/GPAM/SIRT1/FOXH1/UBR5/PGRMC2/CALR/KANK2/SAFB/CNOT1/DAB2/UFM1/PRMT2/RUNX1/SRC/PMEPA1/PGR/PAK1/TRIM68/ARNTL	36
GO:0071560	cellular response to transforming growth factor beta stimulus	59/2886	251/18862	0.000388033	0.00791689	0.00638296	USP9X/SMURF1/THBS1/SMAD6/TGFB2/TGFB3/FERMT2/NR3C1/SMAD5/LOX/NREP/WNT5A/RHOA/ZYX/JUN/TAB1/ONECUT2/HSPA1A/HSP90AB1/ZNF451/CD109/ITGA3/MTMR4/UBB/VEPH1/SKIL/EMILIN1/RPS27A/SPRED2/FYN/HDAC2/HSPA5/ENG/UBC/APPL2/CHST11/LEMD3/USP15/ANKRD1/SIRT1/BMPR1A/PARD3/FOXH1/ING2/LTBP4/PDCD5/UBA52/GDF15/ARHGEF18/PARD6A/TGFB1I1/VASN/DAB2/COL4A2/LATS2/SRC/SLC2A10/PMEPA1/SOX6	59
GO:1903362	regulation of cellular protein catabolic process	59/2886	251/18862	0.000388033	0.00791689	0.00638296	F8A1/UBQLN2/SMURF1/HSP90AA1/DACT1/PSME1/CSNK1A1/VGLL4/RYBP/ATP13A2/RPL11/RNF19B/CDC20/PLK3/FAF1/RPL5/GBA/MGAT3/RNF185/HSPA1A/HSPA1B/HSP90AB1/OSBPL7/RPL23/UBB/RPS7/TRIB2/ATRAID/SOCS5/XPO1/UFL1/TNFAIP3/ABCA2/CHFR/LRP1/LRRK2/LRP2/PSMD14/SUFU/BTRC/WAC/TRIB1/EIF3H/FBXW7/PRKCG/SIRT2/LDLR/KEAP1/PLK1/PKD1/PLK2/CDC20B/DAB2/USP25/TRIB3/AURKA/CTSC/PSMC3/UBXN1	59
GO:2001244	positive regulation of intrinsic apoptotic signaling pathway	20/2886	60/18862	0.00039598	0.00802605	0.00647097	FIS1/STYXL1/MSX1/BMF/RPL11/PTPN2/PMAIP1/BCL2/UBB/RPL26/SKIL/RPS7/BCL2L11/DDIT3/SIRT1/FBXW7/BBC3/SOD1/SERINC3/RPS3	20
GO:0090316	positive regulation of intracellular protein transport	45/2886	179/18862	0.00039959	0.00806331	0.00650101	FIS1/CTDSPL2/CEMIP/SEC16B/RAB29/TP53BP2/SMO/UBE2J2/TP73/ZC3H12A/PLK3/PDZK1/PMAIP1/BCL2/HSPA1L/HSP90AB1/USP36/ERBB2/JUP/CDK5R1/MIEF2/TFDP2/FYN/ANP32B/RAN/CEP290/C2CD5/BAG3/TCF7L2/KIF20B/ANK3/KIF5B/UBR5/YWHAZ/FBXW7/BBC3/AKT2/PDCD5/GAS6/XPO4/ITGB2/E2F1/MAVS/PAK1/CHRM1	45
GO:0042063	gliogenesis	65/2886	283/18862	0.000400426	0.00806331	0.00650101	MMP14/SLC45A3/SRGAP2/TGFB2/DUSP10/HDAC11/PPARG/LAMB2/RHEB/EZH2/SMO/LAMB1/IL6/MXRA8/TP73/TAL1/CDKN2C/LEPR/CSF1/GBA/NCSTN/CDH2/TTBK1/ERBB2/NR1D1/CNTNAP1/ITGB4/NOG/CDK5R1/RNF112/ASPA/HES1/SOX2/EIF2B5/UFL1/NR2E1/HDAC2/ROR2/ANXA1/ABCA2/EIF2B1/P2RX4/RNF10/LRP1/ERBB3/GPC1/LRP2/CDK1/EGR2/PARD3/VIM/NDRG1/AKT2/SIRT2/LDLR/EEF2/BACE2/TIAM1/SOD1/E2F1/BMP2/SOX6/MYRF/CHRM1/CLCF1	65
GO:0007093	mitotic cell cycle checkpoint	41/2886	159/18862	0.00040495	0.00810376	0.00653362	FOXO4/ZWILCH/BTG2/CENPF/DUSP1/CDC25C/XPC/CNOT4/HUS1/CDC20/PLK3/ORC1/GADD45A/MUC1/KLHL22/PPP1R10/CDC6/RPL26/AURKB/TFDP2/BUB1/TTK/CHFR/KNTC1/HMGA2/NABP1/ATF2/CDK1/ARID3A/FBXO31/CNOT1/RBL2/PLK1/EME2/CCNB1/PLK2/RGCC/E2F1/AURKA/ATM/WEE1	41
GO:0000070	mitotic sister chromatid segregation	42/2886	164/18862	0.000405057	0.00810376	0.00653362	KIF4A/PRC1/NCAPG/KIF23/NEK2/CENPF/REC8/DUSP1/CDC23/NCAPG2/PHF13/CDC20/KIF2C/KLHL22/CHMP6/CDC6/TUBG1/CDC27/SPAG5/AURKB/SMC4/BUB1/NCAPH/TTK/RAN/KNTC1/RACGAP1/DIS3L2/CUL3/RAD21/RRS1/CENPE/CHMP2A/KIF22/PLK1/CCNB1/CHAMP1/PIBF1/ATM/KIF18A/INCENP/CDCA5	42
GO:0072163	mesonephric epithelium development	26/2886	87/18862	0.000417184	0.0082927	0.00668595	GPC3/SLIT2/SMAD6/AGT/PBX1/ARG2/SIX4/SMAD5/ROBO2/SMO/WNT2B/BCL2/FOXC1/VEGFA/FOXJ1/NOG/HES1/PAX8/PTCH1/MYC/PKD1/FOXD1/GZF1/BMP2/LGR4/CAT	26
GO:0072164	mesonephric tubule development	26/2886	87/18862	0.000417184	0.0082927	0.00668595	GPC3/SLIT2/SMAD6/AGT/PBX1/ARG2/SIX4/SMAD5/ROBO2/SMO/WNT2B/BCL2/FOXC1/VEGFA/FOXJ1/NOG/HES1/PAX8/PTCH1/MYC/PKD1/FOXD1/GZF1/BMP2/LGR4/CAT	26
GO:2001233	regulation of apoptotic signaling pathway	77/2886	348/18862	0.000421057	0.00834286	0.00672639	DDX3X/SERPINE1/FIS1/STYXL1/MSX1/THBS1/BMF/AGT/ATF3/BDKRB2/HIF1A/RAF1/INHBA/RPL11/FAF1/BCL10/MUC1/PEA15/HMOX1/PTPN2/PMAIP1/BCL2/RIPK1/HSPA1A/HSPA1B/NGFR/NOG/UBB/RPL26/MNT/PAK2/SKIL/RPS7/SLC35F6/EIF2AK3/BCL2L11/FYN/TNFAIP3/PHIP/HNRNPK/DNAJA1/TRIM32/TRAF1/DDIT3/TMBIM6/LRRK2/ITM2C/SCG2/STRADB/NR4A2/TCF7L2/ITPRIP/FAS/SIRT1/PPIF/DEPTOR/STK3/IL7/FGFR1/TNFRSF10B/ING2/HMGB2/FBXW7/BBC3/PLAUR/DEDD2/TMEM161A…	77
GO:0010948	negative regulation of cell cycle process	79/2886	359/18862	0.000426118	0.00839886	0.00677155	HMGN5/FOXO4/BTG2/NEK2/CENPF/MAX/DACT1/PSME1/UIMC1/DUSP1/NPM1/CDC25C/RYBP/PSMD6/EZH2/CNOT4/HUS1/MIIP/CDC20/PLK3/CDKN2C/ORC1/GADD45A/CDC7/MUC1/KLHL22/RBBP8/BCL2/PPP1R10/HSP90AB1/RPL23/PSMD3/CDC6/PSMC5/TOM1L2/RPL26/AURKB/BCL6/TFDP2/PSMD2/CTDSPL/BUB1/TTK/KLF4/ZNF268/CHFR/KNTC1/HMGA2/YAF2/NABP1/PSMD14/CDK1/EPC1/BMI1/RAD21/TMEM67/JADE1/CHMP2A/ATF5/CALR/KANK2/CDKN2D/ARID3A/FBXO31/CNOT1/RBL2/PLK1/CCNB1/P…	79
GO:0050772	positive regulation of axonogenesis	24/2886	78/18862	0.0004266	0.00839886	0.00677155	PLXNA3/PLXNB3/SLIT2/SEMA7A/NIN/ROBO2/PLXNA1/PLXND1/RHOA/PLXNB1/MACF1/NGF/VEGFA/NGFR/WNT3/SKIL/ANAPC2/LRP1/ZFYVE27/MEGF8/MAP1B/TIAM1/PAK1/MAP6	24
GO:1902806	regulation of cell cycle G1/S phase transition	48/2886	195/18862	0.000438702	0.00858245	0.00691956	DDX3X/BTG2/ATP2B4/DACT1/PSME1/CDC25C/HYAL1/EZH2/CNOT4/KMT2E/PLK3/CDKN2C/GADD45A/MUC1/BCL2/CDC6/STXBP4/RPL26/TFDP2/EIF4G1/CTDSPL/ANXA1/KLF4/APPL2/GLI1/CDK1/FBXW7/JADE1/ANKRD17/PAF1/KANK2/CDKN2D/ARID3A/CDK10/FBXO31/CNOT1/RBL2/PKD1/CCNB1/PLK2/RGCC/PRMT2/E2F1/PLCB1/AURKA/ATM/WEE1/CDK2AP2	48
GO:1901216	positive regulation of neuron death	27/2886	92/18862	0.000449394	0.00875511	0.00705877	ELK1/ADORA1/TGFB2/TP53BP2/EIF2S1/EGR1/WNT5A/SRPK2/JUN/ATF4/DAXX/CDK5R1/BCL2L11/GRIK2/FOXO3/FYN/DDIT3/ATF2/DKK1/DDIT4/FBXW7/GRIK5/EFNB2/ITGB2/MYBL2/BACE1/ATM	27
GO:0030308	negative regulation of cell growth	46/2886	185/18862	0.00045036	0.00875511	0.00705877	PLXNA3/TSPYL2/DDX3X/SEMA4B/MSX1/SLIT2/SEMA7A/RGS2/TGFB2/BDKRB1/ESR2/PPP2CA/PPARG/VGLL4/WNT5A/HYAL1/SEMA3B/IP6K2/SEMA3C/INHBA/CDKN2C/SEMA6C/RTN4R/BCL2/KIAA0319/HSPA1A/HSPA1B/WNT3/CDK5R1/BCL6/SEMA4C/GJA1/TCHP/DIP2B/ADIPOR2/SH3BP4/FRZB/SIRT1/CDKN2AIP/JADE1/SERTAD3/CDKN2D/ING1/HNF4A/PAK1/CCDC85B	46
GO:0060350	endochondral bone morphogenesis	18/2886	52/18862	0.000454018	0.00877107	0.00707164	MMP14/FGFR3/FGF18/ALPL/THBS3/MEF2D/FOXC1/AXIN2/IFT80/COL27A1/TRPV4/TMEM119/RARG/SMPD3/GNAS/TSKU/SERPINH1/INPPL1	18
GO:0061614	pri-miRNA transcription by RNA polymerase II	18/2886	52/18862	0.000454018	0.00877107	0.00707164	SMAD6/TGFB2/HIF1A/NR3C1/EGR1/PPARG/GNL3/JUN/NGFR/DDX5/ATOH8/FOXO3/KLF4/BMPR1A/KLF5/BMP2/ETS1/FOSL1	18
GO:0015908	fatty acid transport	39/2886	150/18862	0.000463523	0.00887151	0.00715261	ABCD1/ACSL4/MID1IP1/FIS1/THBS1/SLC27A2/PPFIA4/ADORA1/BDKRB2/ABCD4/PPARG/PRKAG2/CROT/MFSD2A/SLC2A1/CPT2/CPT1B/TNFRSF11A/PROCA1/GJA1/ANXA1/SLC1A1/SLC27A4/P2RX4/ACACB/GLS2/SLC38A2/PER2/PLA2R1/ACSL5/FABP5/ACSL1/SLC7A11/PLA2G12A/PPFIA3/AKT2/SLC38A7/PPFIA1/DRD4	39
GO:0010720	positive regulation of cell development	66/2886	290/18862	0.000473567	0.00903578	0.00728506	PLXNA3/PLXNB3/SRRT/SLIT2/SEMA7A/NUMB/HIF1A/FERMT2/NIN/ROBO2/PLXNA1/PLXND1/PPARG/RHOA/PLXNB1/RHEB/SMO/IL6/CAMK2B/TP73/SPEN/EPHB2/MACF1/NGF/BCL2/NEDD9/CUL7/TTBK1/VEGFA/NGFR/WNT3/RNF112/C1QBP/ASPA/HES1/SKIL/UFL1/HDAC2/TRIM32/ANAPC2/NAP1L1/LRP1/OBSL1/XRCC5/LRP2/DOCK1/ZFYVE27/EGR2/TRIB1/DOCK5/DMTN/VEGFC/MEGF8/SIRT2/CALR/FBXO31/MAP1B/TIAM1/E2F1/BMP2/PREX1/AURKA/PAK1/MAP6/RASSF10/CLCF1	66
GO:0042149	cellular response to glucose starvation	17/2886	48/18862	0.000478256	0.00904153	0.0072897	NUAK2/CPEB4/PRKAG2/ASNS/UPP1/ZC3H12A/SLC2A1/IFI16/ATF4/PMAIP1/BCL2/EIF2AK3/FOXO3/HSPA5/ITFG2/SIK1/SIK2	17
GO:0045540	regulation of cholesterol biosynthetic process	17/2886	48/18862	0.000478256	0.00904153	0.0072897	MBTPS2/PMVK/FDPS/SEC14L2/FASN/RAN/ACACB/LPCAT3/GPAM/SCD/SQLE/FDFT1/MBTPS1/HMGCS1/SOD1/TM7SF2/DHCR7	17
GO:0106118	regulation of sterol biosynthetic process	17/2886	48/18862	0.000478256	0.00904153	0.0072897	MBTPS2/PMVK/FDPS/SEC14L2/FASN/RAN/ACACB/LPCAT3/GPAM/SCD/SQLE/FDFT1/MBTPS1/HMGCS1/SOD1/TM7SF2/DHCR7	17
GO:0071353	cellular response to interleukin-4	13/2886	32/18862	0.000482788	0.00909938	0.00733633	PARP14/PTPN2/HSP90AB1/FASN/SHPK/NFIL3/HSPA5/ADAMTS13/RPLP0/STAT6/TUBA1B/MRC1/KEAP1	13
GO:0071383	cellular response to steroid hormone stimulus	49/2886	201/18862	0.000487886	0.0091675	0.00739126	HDAC6/TRIP4/ESRRG/ESR2/NR3C1/ERRFI1/ARID1A/HEYL/SSTR3/NPC1/FECH/ADTRP/DAXX/NR1D1/DDX5/PER1/BCL2L11/UFL1/NR2E1/SGK1/ANXA1/DNAJA1/NR4A3/CRY1/CALCOCO1/GPAM/SIRT1/DDIT4/FOXH1/UBR5/HEY1/PGRMC2/ZFP36/CALR/KANK2/SAFB/CNOT1/SSTR5/DAB2/FOXO1/UFM1/PRMT2/RUNX1/SRC/PMEPA1/PGR/PAK1/TRIM68/ARNTL	49
GO:0007019	microtubule depolymerization	16/2886	44/18862	0.000496437	0.00927182	0.00747536	HDAC6/MID1IP1/CCSAP/CAMSAP2/KIF2C/CLASP2/TRPV4/NAV3/APC2/MAP1B/KIF2A/TPX2/SPEF1/STMN3/KIF18A/CKAP5	16
GO:0090313	regulation of protein targeting to membrane	14/2886	36/18862	0.000502454	0.00932666	0.00751958	FIS1/CEMIP/PDZK1/ERBB2/CDK5R1/MIEF2/FYN/SLC1A1/C2CD5/ANK3/DMTN/AKT2/ITGB2/PAK1	14
GO:1904358	positive regulation of telomere maintenance via telomere lengthening	14/2886	36/18862	0.000502454	0.00932666	0.00751958	NEK2/HNRNPA2B1/CCT6A/CCT3/AURKB/CCT4/CCT7/TCP1/CCT2/XRCC5/PARN/CCT5/CCT8/ATM	14
GO:0031032	actomyosin structure organization	47/2886	191/18862	0.000504003	0.00932666	0.00751958	MEF2A/ALKBH4/TJP1/ACTA1/TNNT2/CDC42BPA/OBSCN/TGFB3/SIX4/FERMT2/FRMD6/CFL2/EPB41L4A/RHOA/ZYX/ANLN/ARHGEF10L/ASAP3/ARHGAP28/TCAP/KRT19/FLII/SERPINF2/PAK2/CLASP2/RTKN/TSC1/KRT8/RACGAP1/CUL3/OBSL1/NEB/NRAP/SORBS1/PDLIM1/ANKRD1/LDB3/DLC1/FHDC1/MYH14/CNN1/ARHGEF18/RGCC/SRC/PAK1/ARAP1/PPFIA1	47
GO:0090181	regulation of cholesterol metabolic process	20/2886	61/18862	0.000505408	0.00932666	0.00751958	MBTPS2/DGKQ/PMVK/FDPS/SEC14L2/FASN/RAN/ACACB/NR1H4/LPCAT3/GPAM/SCD/SQLE/EPHX2/FDFT1/MBTPS1/HMGCS1/SOD1/TM7SF2/DHCR7	20
GO:0097191	extrinsic apoptotic signaling pathway	52/2886	217/18862	0.000516846	0.00950934	0.00766687	DDX3X/PARP2/SERPINE1/FGFR3/THBS1/AGT/ATF3/TGFB2/SGPP1/RAF1/INHBA/CASP9/FAF1/BCL10/NGF/PEA15/HMOX1/PMAIP1/BCL2/RIPK1/HSPA1A/HSPA1B/DAXX/PAK2/IL12A/SKIL/BCL2L11/FYN/TNFAIP3/PHIP/TRAF1/ERBB3/KRT18/KRT8/ITM2C/SCG2/STRADB/BAG3/TCF7L2/ITPRIP/FAS/DEPTOR/STK3/IL7/FGFR1/TNFRSF10B/TLR3/HMGB2/DEDD2/DAPK3/CYLD/SRC	52
GO:0051261	protein depolymerization	31/2886	112/18862	0.000547975	0.00996348	0.00803301	HDAC6/MID1IP1/CCSAP/CAMSAP2/CFL2/CAPZA2/KIF2C/NES/MICAL3/FLII/CLASP2/SPTBN1/TRPV4/NAV3/AVIL/LIMA1/VIL1/ADD3/DMTN/SPTBN4/SH3GL1/APC2/MAP1B/KIF2A/SYNJ1/TPX2/SPEF1/STMN3/HSPA8/KIF18A/CKAP5	31
GO:0019218	regulation of steroid metabolic process	33/2886	122/18862	0.000579375	0.0105035	0.0084684	MBTPS2/DGKQ/AGT/FGFR4/EGR1/INSIG1/PMVK/FDPS/SEC14L2/FASN/NR1D1/ABCA2/RAN/ACACB/NR1H4/DHH/LPCAT3/GPAM/SCD/SIRT1/SQLE/EPHX2/ASAH1/FDFT1/NFKB1/MBTPS1/HMGCS1/SOD1/BMP2/APOA4/ADM/TM7SF2/DHCR7	33
GO:0003007	heart morphogenesis	56/2886	239/18862	0.000583822	0.0105284	0.0084885	MSX1/SLIT2/DLL4/SMAD6/BBS4/TNNT2/TGFB2/FLRT2/HIF1A/ROBO2/PLXND1/WNT5A/SMO/SEMA3C/DHRS3/HEYL/STIL/RBM15/TAB1/FOXC1/PIM1/VEGFA/GAA/CCDC40/TCAP/FZD2/CCDC103/AXIN2/NOG/HES1/CCDC39/IFT172/FHL2/AHI1/PTCH1/ENG/ATF2/LRP2/TBR1/PDCD4/SUFU/ANKRD1/DKK1/BMPR1A/FOXH1/HEY1/CHD7/DLC1/PITX2/MEGF8/INSR/ZFPM1/POU4F1/ASXL1/BMP2/C2CD3	56
GO:0007051	spindle organization	45/2886	182/18862	0.000587364	0.0105284	0.0084885	KIF4A/HAUS4/PRC1/TUBGCP5/KIF23/CCSAP/NEK2/DYNC1H1/CCDC69/TRIM36/SPICE1/RHOA/GNAI1/CDC20/STIL/TUBGCP6/TUBB/HSPA1A/HSPA1B/EFHC1/TUBG1/SPAG5/AURKB/CLASP2/TTK/RAN/RACGAP1/KIFC2/CENPE/CHMP2A/CCDC61/PLK1/PKD1/CCNB1/KIF2A/PLK2/PIBF1/KIF3B/TPX2/MYBL2/AURKA/UVRAG/RPS3/CKAP5/INCENP	45
GO:0070200	establishment of protein localization to telomere	9/2886	18/18862	0.000590551	0.0105284	0.0084885	CCT6A/CCT3/CCT4/CCT7/TCP1/CCT2/CCT5/CCT8/ATM	9
GO:0017015	regulation of transforming growth factor beta receptor signaling pathway	34/2886	127/18862	0.000590968	0.0105284	0.0084885	SMURF1/THBS1/SMAD6/TGFB3/LOX/NREP/ONECUT2/HSPA1A/HSP90AB1/ZNF451/CD109/ITGA3/MTMR4/UBB/VEPH1/SKIL/EMILIN1/RPS27A/SPRED2/HSPA5/ENG/UBC/CHST11/LEMD3/SIRT1/ING2/LTBP4/UBA52/TGFB1I1/VASN/DAB2/LATS2/SLC2A10/PMEPA1	34
GO:0070498	interleukin-1-mediated signaling pathway	29/2886	103/18862	0.000601473	0.0106848	0.00861456	NFKBIA/PSME1/SQSTM1/FBXW11/EGR1/IRAK2/PSMD6/IL6/TAB1/PSMD3/PSMC5/UBB/IL1RAP/PSMD2/RPS27A/PELI1/IL1R2/UBC/PSMD14/BTRC/RIPK2/IKBKB/OTUD4/NFKB1/UBA52/PLCB1/PSMA7/PSMC3/TOLLIP	29
GO:0009952	anterior/posterior pattern specification	49/2886	203/18862	0.000619393	0.0109716	0.00884581	GPC3/NR2F2/MSX1/PBX1/BTG2/BHLHE40/WNT5A/SMO/SEMA3C/HOXA2/HOXA3/HES4/HEYL/CELSR2/WNT2B/TSHZ1/FOXC1/HOXB9/HOXB5/TCAP/WNT3/AXIN2/NOG/HES7/HES1/ROR2/NRARP/KDM2B/FRS2/DDIT3/HOXC6/HOXC4/HOXC13/RARG/BHLHE41/TULP3/GBX2/HOXD3/HOXD4/HOXD8/EMX2/BMPR1A/FOXH1/ARC/HEY1/POFUT1/BMP2/AURKA/ATM	49
GO:0030518	intracellular steroid hormone receptor signaling pathway	31/2886	113/18862	0.000646209	0.0114139	0.0092024	HDAC6/TRIP4/ESR2/NR3C1/ARID1A/HEYL/DAXX/DDX5/PER1/UFL1/DNAJA1/CRY1/CALCOCO1/GPAM/SIRT1/FOXH1/UBR5/CALR/KANK2/SAFB/CNOT1/DAB2/UFM1/PRMT2/RUNX1/SRC/PMEPA1/PGR/PAK1/TRIM68/ARNTL	31
GO:0034311	diol metabolic process	12/2886	29/18862	0.000650611	0.0114264	0.00921245	SPTLC2/SGPP1/GCH1/GBA/SPHK1/SPR/SPTLC1/ACER2/ABCA2/PCBD1/ASAH1/SPTLC3	12
GO:0061138	morphogenesis of a branching epithelium	43/2886	173/18862	0.000683643	0.0118445	0.00954959	GPC3/MMP14/SLIT2/DLL4/CTSH/AGT/PBX1/KDM5B/SIX4/CASR/PLXNA1/PLXND1/WNT5A/SMO/SEMA3C/EPHA2/CSF1/RBM15/WNT2B/CELSR1/BCL2/VEGFA/PKHD1/NOG/PAX8/RSPO3/PTCH1/ENG/NRARP/NTN4/FRS2/GBX2/BTRC/MYC/PKD1/FOXD1/GZF1/BMP2/SRC/PGR/PAK1/ADM/LGR4	43
GO:0032212	positive regulation of telomere maintenance via telomerase	13/2886	33/18862	0.000685916	0.0118445	0.00954959	NEK2/CCT6A/CCT3/AURKB/CCT4/CCT7/TCP1/CCT2/XRCC5/PARN/CCT5/CCT8/ATM	13
GO:0051973	positive regulation of telomerase activity	13/2886	33/18862	0.000685916	0.0118445	0.00954959	NEK2/HSP90AA1/HSP90AB1/AURKB/CCT4/TCP1/KLF4/CCT2/PTGES3/XRCC5/MYC/PARM1/PARN	13
GO:0042994	cytoplasmic sequestering of transcription factor	8/2886	15/18862	0.000695352	0.0118748	0.00957399	NFKBIA/FAF1/NFKBIE/SUFU/G3BP2/NFKBIB/KEAP1/PKD1	8
GO:0043517	positive regulation of DNA damage response, signal transduction by p53 class mediator	8/2886	15/18862	0.000695352	0.0118748	0.00957399	MSX1/PMAIP1/DDX5/RPL26/SPRED2/PLA2R1/ANKRD1/ATM	8
GO:0071428	rRNA-containing ribonucleoprotein complex export from nucleus	8/2886	15/18862	0.000695352	0.0118748	0.00957399	NPM1/XPO1/TSC1/RAN/RRS1/ABCE1/SDAD1/RPS15	8
GO:1904874	positive regulation of telomerase RNA localization to Cajal body	8/2886	15/18862	0.000695352	0.0118748	0.00957399	CCT6A/CCT3/CCT4/CCT7/TCP1/CCT2/CCT5/CCT8	8
GO:0035567	non-canonical Wnt signaling pathway	39/2886	153/18862	0.00070476	0.0119561	0.00963951	GPC3/SMURF1/PDE6B/CCDC88C/DAAM1/DACT1/PSME1/PSMD6/WNT5A/RHOA/FZD1/AGO4/AGO1/CELSR2/CELSR1/TNRC6B/PSMD3/FZD2/PSMC5/IFT80/PSMD2/RSPO3/ROR2/FRZB/PSMD14/TCF7L2/DKK1/FZD8/AGO2/FZD6/PLEKHA4/PARD6A/DAB2/TIAM1/SPEF1/PLCB1/PSMA7/FZD4/PSMC3	39
GO:0048754	branching morphogenesis of an epithelial tube	37/2886	143/18862	0.00070505	0.0119561	0.00963951	GPC3/MMP14/SLIT2/DLL4/CTSH/AGT/PBX1/KDM5B/SIX4/CASR/PLXND1/WNT5A/SMO/EPHA2/CSF1/RBM15/WNT2B/CELSR1/BCL2/VEGFA/PKHD1/NOG/PAX8/PTCH1/ENG/NRARP/GBX2/BTRC/MYC/PKD1/FOXD1/GZF1/BMP2/SRC/PGR/PAK1/LGR4	37
GO:0032922	circadian regulation of gene expression	21/2886	67/18862	0.000727132	0.0122818	0.00990212	EGR1/BHLHE40/NAMPT/AHR/PER3/ATF4/NGFR/NR1D1/PER1/PPP1CB/HDAC2/CRY1/BHLHE41/PER2/SIRT1/NCOA2/RELB/USP2/ARNTL/LGR4/RBM4B	21
GO:0043618	regulation of transcription from RNA polymerase II promoter in response to stress	30/2886	109/18862	0.000738831	0.0124116	0.0100068	MBTPS2/ATF3/HIF1A/PSME1/EGR1/PSMD6/LIMD1/JUN/MUC1/ATF4/HMOX1/HSPA1A/ATF6B/VEGFA/PSMD3/PSMC5/UBB/PSMD2/RPS27A/HSPA5/UBC/DDIT3/TMBIM6/PSMD14/BAG3/SIRT2/UBA52/DNAJB1/PSMA7/PSMC3	30
GO:0015780	nucleotide-sugar transmembrane transport	7/2886	12/18862	0.000757245	0.0126515	0.0102002	SLC35A4/SLC35A5/SLC35B4/SLC35D1/SLC35A3/SLC35B1/SLC35A1	7
GO:0051255	spindle midzone assembly	7/2886	12/18862	0.000757245	0.0126515	0.0102002	KIF4A/PRC1/KIF23/CCDC69/AURKB/RACGAP1/INCENP	7
GO:0060070	canonical Wnt signaling pathway	73/2886	333/18862	0.000770496	0.0128043	0.0103234	GPC3/DDX3X/CHD8/CCDC88C/DACT1/PSME1/CSNK1A1/EGR1/MITF/PSMD6/WNT5A/LIMD1/CDK14/FZD1/HECW1/RNF220/WNT2B/PYGO2/WNT7B/KREMEN1/CDH2/PSMD3/JUP/FZD2/WNT3/PSMC5/AXIN2/NOG/SOX2/PSMD2/RSPO3/WNK2/ROR2/KANK1/INVS/KLF4/NRARP/SCYL2/DDIT3/GLI1/RARG/LRRK2/CUL3/FRZB/PSMD14/NR4A2/TCF7L2/BTRC/DKK1/FZD8/JRK/FZD6/UBR5/STK3/JADE1/NFKB1/TRPM4/PLEKHA4/DAPK3/APC2/CYLD/ZBED3/DAB2/LATS2/BMP2/SRC/PSMA7/DIXDC1/FZD4/USP47/ARN…	73
GO:2000045	regulation of G1/S transition of mitotic cell cycle	43/2886	174/18862	0.000775996	0.0128611	0.0103692	DDX3X/BTG2/DACT1/PSME1/CDC25C/HYAL1/EZH2/CNOT4/KMT2E/PLK3/CDKN2C/GADD45A/MUC1/BCL2/CDC6/RPL26/TFDP2/EIF4G1/CTDSPL/ANXA1/KLF4/APPL2/CDK1/JADE1/ANKRD17/KANK2/CDKN2D/ARID3A/CDK10/FBXO31/CNOT1/RBL2/PKD1/CCNB1/PLK2/RGCC/PRMT2/E2F1/PLCB1/AURKA/ATM/WEE1/CDK2AP2	43
GO:0031110	regulation of microtubule polymerization or depolymerization	24/2886	81/18862	0.000782837	0.0129398	0.0104327	HDAC6/MID1IP1/CAMSAP2/NIN/INPP5J/HSPA1A/HSPA1B/CDK5R1/CLASP2/CLIP1/TRPV4/NAV3/FKBP4/APC2/MAP1B/OCLN/SKA3/DYRK1A/TPX2/SPEF1/STMN3/PAK1/RPS3/CKAP5	24
GO:0051092	positive regulation of NF-kappaB transcription factor activity	40/2886	159/18862	0.000801554	0.0131948	0.0106382	ADAM8/AGT/DHX9/TRIM52/NPM1/IRAK2/WNT5A/BCL10/TAB1/TNFRSF11A/RIPK1/TRIM38/TRIM27/HSPA1A/HSPA1B/CARD14/SPHK1/TRIM25/LGALS9/UBB/IL1RAP/ALK/RPS27A/IL18RAP/TRIM32/TRAF1/UBC/NFKB2/MTDH/RIPK2/IKBKB/TLR3/NFKB1/UBA52/ITGB2/RPS3/TRIM68/TRIM6/TRIM5/CAT	40
GO:0044783	G1 DNA damage checkpoint	20/2886	63/18862	0.000804728	0.0131948	0.0106382	BTG2/CDC25C/CNOT4/PLK3/GADD45A/MUC1/RPL26/TFDP2/CDK1/WAC/ARID3A/FBXO31/CNOT1/RBL2/CCNB1/PLK2/RGCC/E2F1/AURKA/ATM	20
GO:0042273	ribosomal large subunit biogenesis	22/2886	72/18862	0.000808085	0.0131948	0.0106382	NPM1/DHX30/RPL14/RPL11/RPL5/PAK1IP1/RPL10A/RPL38/RPL26/RPL35/RPLP0/RPL6/NOP2/GTPBP4/RPL7/RRS1/MRPL1/SDAD1/BRIX1/ZNF622/GTF3A/WDR74	22
GO:2001020	regulation of response to DNA damage stimulus	52/2886	221/18862	0.000810628	0.0131948	0.0106382	USP51/KLHL15/ZCWPW1/MSX1/DHX9/DYRK3/UIMC1/PARP9/DTX3L/NEK4/SETD2/PAXIP1/CASP9/USP1/MUC1/SMCHD1/PMAIP1/BCL2/PPP1R10/IER3/DDX39B/DDX5/AXIN2/RECQL5/KAT7/RPL26/SKIL/FXR1/SPRED2/HNRNPK/TRIM32/CRY1/HMGA2/FOXM1/TRIP12/PLA2R1/ANKRD1/SIRT1/MYC/UBR5/ING2/PRKCG/TMEM161A/CDKN2D/SMG1/NUDT16L1/TPT1/DYRK1A/ATM/RPS3/FAM168A/USP47	52
GO:0042176	regulation of protein catabolic process	82/2886	383/18862	0.000811111	0.0131948	0.0106382	F8A1/GPC3/UBQLN2/SMURF1/ADAM8/SNX33/HSP90AA1/DACT1/PSME1/CSNK1A1/VGLL4/RYBP/WNT5A/HECW1/ATP13A2/RPL11/RNF19B/CDC20/PLK3/FAF1/RPL5/GBA/MGAT3/RNF185/RHBDD3/HSPA1A/HSPA1B/HSP90AB1/EEF1A1/CHMP6/TIMP2/OSBPL7/RPL23/PSMD3/UBB/RILP/TIPARP/PSMD2/RPS7/ODC1/TRIB2/ATRAID/SOCS5/XPO1/UFL1/SNX3/FYN/GJA1/TNFAIP3/TRIM32/ABCA2/CHFR/LRP1/LRRK2/LRP2/PSMD14/SUFU/BTRC/WAC/TRIB1/EIF3H/AZIN1/FBXW7/PRKCG/SIRT2/LDLR/KEAP1…	82
GO:0001657	ureteric bud development	25/2886	86/18862	0.000837879	0.0135596	0.0109324	GPC3/SLIT2/SMAD6/AGT/PBX1/ARG2/SIX4/SMAD5/ROBO2/SMO/WNT2B/BCL2/FOXC1/VEGFA/FOXJ1/NOG/HES1/PAX8/PTCH1/MYC/FOXD1/GZF1/BMP2/LGR4/CAT	25
GO:0061082	myeloid leukocyte cytokine production	11/2886	26/18862	0.00087216	0.0140409	0.0113204	SEMA7A/TGFB2/TGFB3/WNT5A/BCL10/HMOX1/BCL6/NR4A3/SIRT1/DDX21/MAVS	11
GO:0010827	regulation of glucose transmembrane transport	23/2886	77/18862	0.000882082	0.0141256	0.0113887	GPC3/MEF2A/RNASEL/PRKAG2/RSC1A1/SLC2A1/PEA15/SLC25A27/STXBP4/NR4A3/APPL2/C2CD5/CREBL2/ADIPOR2/CAPN10/SORBS1/FABP5/RTN2/AKT2/INSR/C3/OCLN/TRIB3	23
GO:0046785	microtubule polymerization	23/2886	77/18862	0.000882082	0.0141256	0.0113887	TUBGCP5/CAMSAP2/NIN/TUBGCP6/INPP5J/RANBP9/HSPA1A/HSPA1B/CCDC57/TUBG1/CDK5R1/CLASP2/CLIP1/TRPV4/NAV3/FKBP4/MAP1B/OCLN/DYRK1A/TPX2/PAK1/RPS3/CKAP5	23
GO:0001823	mesonephros development	26/2886	91/18862	0.000886562	0.0141256	0.0113887	GPC3/SLIT2/SMAD6/AGT/PBX1/ARG2/SIX4/SMAD5/ROBO2/SMO/WNT2B/BCL2/FOXC1/VEGFA/FOXJ1/NOG/HES1/PAX8/PTCH1/MYC/PKD1/FOXD1/GZF1/BMP2/LGR4/CAT	26
GO:0034502	protein localization to chromosome	26/2886	91/18862	0.000886562	0.0141256	0.0113887	HDAC8/ZWILCH/GNL3/SETD2/EZH2/CCT6A/CCT3/AURKB/CENPA/CCT4/CCT7/TCP1/TTK/CCT2/PPHLN1/XRCC5/CDK1/RAD21/PLK1/CCT5/CHAMP1/CCT8/MCM8/ATM/TPP1/CDCA5	26
GO:0007004	telomere maintenance via telomerase	21/2886	68/18862	0.000902453	0.0143418	0.011563	HNRNPC/NEK2/HSP90AA1/CCT6A/EXOSC10/CCT3/HSP90AB1/AURKB/CCT4/CCT7/TCP1/CCT2/PTGES3/XRCC5/GAR1/PARN/CCT5/CCT8/SRC/ATM/NAT10	21
GO:2001242	regulation of intrinsic apoptotic signaling pathway	40/2886	160/18862	0.000913639	0.0144823	0.0116763	DDX3X/FIS1/STYXL1/MSX1/BMF/BDKRB2/HIF1A/RPL11/MUC1/PTPN2/PMAIP1/BCL2/HSPA1A/UBB/RPL26/SKIL/RPS7/EIF2AK3/BCL2L11/HNRNPK/DNAJA1/TRIM32/DDIT3/TMBIM6/LRRK2/SIRT1/PPIF/ING2/FBXW7/BBC3/PLAUR/TMEM161A/CDKN2D/CYLD/TPT1/SOD1/SRC/SERINC3/RPS3/USP47	40
GO:0010631	epithelial cell migration	77/2886	357/18862	0.000922402	0.0145839	0.0117582	SRPX2/HDAC6/NR2F2/SLIT2/THBS1/DLL4/DNAJA4/CTSH/AGT/ATP2B4/TGFB2/DUSP10/VASH1/HIF1A/FGF18/SPARC/HBEGF/PLXND1/IQSEC1/PPARG/ADAMTS9/WNT5A/HYAL1/RHOA/PAXIP1/ANLN/PIK3CD/EPHA2/ZC3H12A/MACF1/GADD45A/HMOX1/PATZ1/ADTRP/VEGFA/JUP/HDAC5/ITGA3/MAP2K3/CLASP2/RHOB/PRKCE/ATOH8/NR2E1/ANXA1/KANK1/KLF4/SCARB1/P2RX4/NR4A1/SCG2/VIL1/DPP4/ZEB2/DOCK1/NANOS1/SIRT1/FGFR1/DOCK5/LOXL2/EGR3/ANGPT2/VEGFC/FBXW7/ZNF580/EMC10…	77
GO:1903844	regulation of cellular response to transforming growth factor beta stimulus	34/2886	130/18862	0.000926312	0.0146083	0.0117779	SMURF1/THBS1/SMAD6/TGFB3/LOX/NREP/ONECUT2/HSPA1A/HSP90AB1/ZNF451/CD109/ITGA3/MTMR4/UBB/VEPH1/SKIL/EMILIN1/RPS27A/SPRED2/HSPA5/ENG/UBC/CHST11/LEMD3/SIRT1/ING2/LTBP4/UBA52/TGFB1I1/VASN/DAB2/LATS2/SLC2A10/PMEPA1	34
GO:0003279	cardiac septum development	27/2886	96/18862	0.000928925	0.0146122	0.0117811	SLIT2/SMAD6/TGFB2/NDST1/MATR3/ROBO2/PLXND1/WNT5A/SMO/SEMA3C/DHRS3/HEYL/RBM15/TAB1/ZBTB14/FZD2/NOG/HES1/ENG/FRS2/LRP2/SUFU/BMPR1A/HEY1/CHD7/ANK2/ZFPM1	27
GO:0070198	protein localization to chromosome, telomeric region	12/2886	30/18862	0.000934603	0.0146271	0.0117931	GNL3/CCT6A/CCT3/CCT4/CCT7/TCP1/CCT2/XRCC5/CCT5/CCT8/ATM/TPP1	12
GO:0090314	positive regulation of protein targeting to membrane	12/2886	30/18862	0.000934603	0.0146271	0.0117931	FIS1/CEMIP/PDZK1/ERBB2/CDK5R1/MIEF2/FYN/C2CD5/ANK3/AKT2/ITGB2/PAK1	12
GO:0060612	adipose tissue development	14/2886	38/18862	0.000947724	0.0147718	0.0119097	SPTLC2/SH3PXD2B/CASR/PAXIP1/CSF1/UBB/SLC25A25/NR1H4/ATF2/SIRT1/PGRMC2/TRPM4/ARRDC3/OXCT1	14
GO:0051443	positive regulation of ubiquitin-protein transferase activity	13/2886	34/18862	0.000956413	0.0148424	0.0119666	ARRDC4/CDC20/TOPORS/BTRC/BMI1/FBXW7/UBE2S/PLK1/RPS2/ARRDC3/CDC20B/TRIB3/DCUN1D5	13
GO:0070932	histone H3 deacetylation	9/2886	19/18862	0.000970329	0.0149655	0.0120658	HDAC8/HDAC6/HDAC11/HDAC5/PER1/HDAC2/PER2/SIRT1/SIRT2	9
GO:0048732	gland development	87/2886	413/18862	0.000970746	0.0149655	0.0120658	COX2/UPRT/MSX1/PKM/PBX1/ELF3/KDM5B/TGFB2/HLX/SERPINA5/TGFB3/HIF1A/SIX4/PLXNA1/PLXND1/RAF1/WNT5A/MST1/EZH2/SMO/SEMA3C/ASNS/IL6/HOXA3/EPHA2/HMGCL/AK4/CSF1/PYGO2/MTX1/WNT7B/HMOX1/RHBDD3/ONECUT2/TNFRSF11A/BCL2/FOXC1/DDX39B/VEGFA/FASN/CCDC40/HOXB9/WNT3/NOG/HES1/CCDC39/SOX2/PAX8/BCL2L11/TNFAIP3/PTCH1/ANXA1/ZDHHC21/HNF1A/NTN4/SOCS2/FRS2/GLI1/RARG/KRT18/CUL3/IGFBP5/FRZB/HOXD3/BTRC/BMPR1A/FBXW7/PITX2/HNRN…	87
GO:0043122	regulation of I-kappaB kinase/NF-kappaB signaling	56/2886	244/18862	0.000987672	0.0151508	0.0122153	MAPKBP1/TRAF3/TRIM52/SQSTM1/WNT5A/RHOA/ZC3H12A/MIER1/BCL10/S100A13/LGALS1/HMOX1/VAPA/RIOK3/RIPK1/TRIM38/TRIM27/SECTM1/NR1D1/TMEM101/TRIM25/LGALS9/PER1/PRKCE/REL/PELI1/SLC20A1/UFL1/FYN/GJA1/TNFAIP3/TRIM32/TRAF1/NR1H4/TANK/BTRC/SIRT1/DDX21/OPTN/EEF1D/MTDH/RIPK2/IKBKB/TNFRSF10B/TLR3/ALPK1/ANKRD17/CARD8/CC2D1A/PLK2/MAVS/LIME1/BIRC3/TRIM68/TRIM6/TRIM5	56
GO:0090596	sensory organ morphogenesis	56/2886	244/18862	0.000987672	0.0151508	0.0122153	MSX1/BBS4/HIF1A/SIX4/COL8A1/IFT122/LRIG1/WNT5A/INSIG1/HOXA2/EPHA2/EPHB2/MFSD2A/BCAR3/WNT2B/ATF4/TTC39C/BCL2/TSHZ1/SLC44A4/VEGFA/FSCN2/TCAP/FZD2/RPL38/NOG/IFT172/EFEMP1/PAX8/HDAC2/AHI1/ROR2/AGTPBP1/SLC1A1/TOPORS/TPRN/KDM2B/CEP290/FRS2/LRIG3/HOXC13/RARG/GBX2/OBSL1/FRZB/PDZD7/FZD6/CHD7/INTU/PITX2/HPN/RPGRIP1L/SOD1/TSKU/USH1C/PAX6	56
GO:0051310	metaphase plate congression	20/2886	64/18862	0.00100449	0.0153708	0.0123926	CENPF/DYNC1H1/CDC23/SPICE1/KIF2C/CHMP6/SPAG5/AURKB/CUL3/GEM/RRS1/CENPE/CHMP2A/KIF22/CCNB1/CHAMP1/PIBF1/KIF18A/INCENP/CDCA5	20
GO:0016358	dendrite development	54/2886	234/18862	0.00105298	0.0159006	0.0128198	HPRT1/ACSL4/HDAC6/MEF2A/BBS4/CAMSAP2/SRGAP2/IQSEC1/EZH2/HECW1/CAMK2B/EPHB2/MFSD2A/CDC20/CELSR2/CHRNB2/IGSF9/DCDC2/KIAA0319/CUL7/CDK5R1/SEZ6/MINK1/SCARF1/PAK2/NLGN1/DGKG/ALK/RTN4IP1/NR2E1/FYN/HDAC2/TPBG/TMEFF1/ANAPC2/LRRK2/OBSL1/PRKG1/ARC/SHANK1/ARHGAP33/CRTC1/FBXO31/MAP1B/PLK2/SLITRK5/DIP2A/TIAM1/BTBD3/SLC12A5/PREX1/MAP6/FLRT1/SHANK2	54
GO:0010718	positive regulation of epithelial to mesenchymal transition	17/2886	51/18862	0.00105538	0.0159006	0.0128198	TGFB2/TGFB3/FERMT2/EZH2/IL6/FOXC1/AXIN2/HDAC2/ENG/ALX1/TCF7L2/LOXL2/TGFB1I1/DAB2/RGCC/TIAM1/BMP2	17
GO:0032206	positive regulation of telomere maintenance	17/2886	51/18862	0.00105538	0.0159006	0.0128198	NEK2/GNL3/HNRNPA2B1/CCT6A/CCT3/PPP1R10/AURKB/CCT4/CCT7/TCP1/CCT2/XRCC5/HNRNPD/PARN/CCT5/CCT8/ATM	17
GO:1902893	regulation of pri-miRNA transcription by RNA polymerase II	17/2886	51/18862	0.00105538	0.0159006	0.0128198	SMAD6/TGFB2/HIF1A/NR3C1/EGR1/PPARG/GNL3/JUN/NGFR/ATOH8/FOXO3/KLF4/BMPR1A/KLF5/BMP2/ETS1/FOSL1	17
GO:1901991	negative regulation of mitotic cell cycle phase transition	57/2886	250/18862	0.00105712	0.0159006	0.0128198	FOXO4/BTG2/CENPF/DACT1/PSME1/DUSP1/CDC25C/PSMD6/EZH2/CNOT4/HUS1/MIIP/CDC20/PLK3/CDKN2C/ORC1/GADD45A/MUC1/KLHL22/BCL2/PSMD3/CDC6/PSMC5/RPL26/AURKB/TFDP2/PSMD2/CTDSPL/BUB1/TTK/KLF4/KNTC1/HMGA2/NABP1/PSMD14/CDK1/RAD21/JADE1/KANK2/CDKN2D/ARID3A/FBXO31/CNOT1/RBL2/PLK1/CCNB1/PLK2/RGCC/PRMT2/E2F1/AURKA/PSMA7/ATM/WEE1/USP47/PSMC3/CDK2AP2	57
GO:0048705	skeletal system morphogenesis	50/2886	213/18862	0.00106603	0.0159956	0.0128964	MMP14/FGFR3/MSX1/TGFB3/SIX4/FGF18/NDST1/HYAL1/SETD2/INSIG1/HOXA2/HOXA3/DHRS3/ALPL/THBS3/MEF2D/FOXC1/EIF4A3/HOXB9/HOXB5/AXIN2/CHAD/NOG/TIPARP/IFT80/CSRNP1/MTHFD1L/ROR2/ZFAND5/COL27A1/TRPV4/TMEM119/CHST11/ALX1/HOXC4/RARG/TULP3/HOXD3/HOXD4/HOXD8/FGFR1/MEGF8/SMPD3/PKD1/SPEF2/GNAS/TSKU/SERPINH1/INPPL1/SOX6	50
GO:0048738	cardiac muscle tissue development	49/2886	208/18862	0.00109559	0.0163994	0.0132219	PARP2/MEF2A/ALPK3/DLL4/CACYBP/RGS2/TNNT2/TGFB2/VGLL4/ADAMTS9/WNT5A/TP73/MAPK11/FOXC1/DDX39B/PIM1/VEGFA/TCAP/GJC1/NOG/KDM6B/FHL2/GJA1/ENG/TSC1/LRRC10/FRS2/GLI1/ERBB3/OBSL1/LRP2/NEB/NRAP/ANKRD1/DKK1/BMPR1A/FOXH1/CHD7/SGCB/CALR/ZFPM1/CCNB1/EFNB2/POU4F1/SIK1/RUNX1/BMP2/PAK1/SOX6	49
GO:0016239	positive regulation of macroautophagy	19/2886	60/18862	0.00111362	0.016629	0.013407	RAB3GAP2/SPTLC2/HIF1A/ADRB2/FYCO1/HMOX1/PIP4K2B/SPTLC1/TSC1/ULK1/HSPB8/BAG3/SIRT1/WAC/OPTN/RIPK2/BNIP3L/SCOC/UVRAG	19
GO:0015711	organic anion transport	80/2886	376/18862	0.00112604	0.0167449	0.0135005	SLC16A2/SLC38A5/SLC7A8/SLC7A7/SLC26A1/MFSD10/AQP9/RGS2/PPFIA4/ADORA1/BDKRB2/SFXN1/SLC23A1/CASR/SLC6A6/SLC38A3/SLC35B4/ABCB4/MFSD2A/SLC2A1/SLC35D1/SLC35A3/ATP8B1/TNFRSF11A/SLC17A4/SLC17A1/SLC17A3/SLC44A4/ABCC10/NFKBIE/SLC17A5/SLC16A3/SLC35B1/SLC16A5/LLGL2/ABCC3/PROCA1/SLC46A1/SLC47A1/CTNS/SLCO2A1/SLC2A2/SLC25A38/SLC3A1/SFXN5/GJA1/SLC35A1/ANXA1/SLC1A1/SLC25A25/SLC27A4/P2RX4/NR1H4/GLS2/SLC38A2/PER2/…	80
GO:0045930	negative regulation of mitotic cell cycle	70/2886	321/18862	0.00113089	0.0167449	0.0135005	FOXO4/ZWILCH/BTG2/CENPF/DACT1/PSME1/DUSP1/CDC25C/XPC/PSMD6/EZH2/CNOT4/HUS1/MIIP/CDC20/PLK3/CDKN2C/ORC1/GADD45A/CDC14A/MUC1/KLHL22/BCL2/FOXC1/PPP1R10/TIMP2/PSMD3/CDC6/PSMC5/TOM1L2/RPL26/AURKB/BCL6/TFDP2/PSMD2/CTDSPL/BUB1/TTK/GAS1/KLF4/CHFR/KNTC1/HMGA2/NABP1/ATF2/PSMD14/CDK1/RAD21/JADE1/KANK2/CDKN2D/ARID3A/FBXO31/CNOT1/RBL2/PLK1/EME2/CCNB1/PLK2/RGCC/PRMT2/BTG3/E2F1/AURKA/PSMA7/ATM/WEE1/USP47/PSMC3/…	70
GO:1903706	regulation of hemopoiesis	87/2886	415/18862	0.00113118	0.0167449	0.0135005	MMP14/PNP/ADAM8/KLF13/THBS1/WDR61/TNFSF4/CD46/HLX/DUSP10/HIF1A/SOS2/NFKBIA/HSPA9/IRF1/LOX/MITF/NCAPG2/KMT2C/CNOT4/KMT2E/LRRC17/INHBA/ISG15/AGO4/AGO1/ZC3H12A/TAL1/MYSM1/JUN/CSF1/RBM15/XRCC6/TNRC6B/ANKRD54/PTPN2/RIPK1/CD83/HSPA1A/HSPA1B/SMAP1/ERBB2/FOXJ1/KAT7/NME2/LGALS9/GP1BA/BCL6/DPY30/SOCS5/PRDM1/FOXO3/ROR2/ANXA1/NR4A3/NRARP/RARG/INPP5D/ZNF16/MYC/TRIB1/KLF10/RIPK2/CA2/IL7/ASH2L/EGR3/TLR3/HMGB2/F…	87
GO:0032388	positive regulation of intracellular transport	51/2886	219/18862	0.00115405	0.016948	0.0136643	FIS1/CTDSPL2/CEMIP/SEC16B/DHX9/RAB29/TP53BP2/DYNC1H1/NRDE2/SMO/UBE2J2/TP73/ZC3H12A/PLK3/PDZK1/PMAIP1/BCL2/HSPA1L/HSP90AB1/USP36/ERBB2/JUP/CDK5R1/SPAG5/MIEF2/TFDP2/FYN/ANP32B/RAN/CEP290/C2CD5/CAPN10/BAG3/TCF7L2/KIF20B/ANK3/KIF5B/UBR5/YWHAZ/FBXW7/BBC3/AKT2/PDCD5/DAB2/GAS6/XPO4/ITGB2/E2F1/MAVS/PAK1/CHRM1	51
GO:0051054	positive regulation of DNA metabolic process	47/2886	198/18862	0.00115418	0.016948	0.0136643	USP9X/ZCWPW1/TNFSF4/DHX9/NEK2/HSP90AA1/FGFR4/UIMC1/PARP9/DTX3L/GNL3/PAXIP1/IL6/HNRNPA2B1/CCT6A/CCT3/SMCHD1/PPP1R10/DDX39B/HSP90AB1/POLG2/AURKB/TNFSF13/CCT4/CCT7/TCP1/KLF4/CCT2/PTGES3/FOXM1/XRCC5/SIRT1/MYC/OTUD4/HNRNPD/PARM1/PRKCG/TMEM161A/PARN/CCT5/RGCC/CCT8/SRC/ATM/RPS3/FAM168A/CLCF1	47
GO:0036499	PERK-mediated unfolded protein response	10/2886	23/18862	0.00116029	0.0169974	0.0137041	TMEM33/PPP1R15B/ATF3/EIF2S1/ASNS/ATF4/PTPN2/EIF2AK3/HSPA5/DDIT3	10
GO:0007422	peripheral nervous system development	22/2886	74/18862	0.00121076	0.017653	0.0142327	LAMB2/ARTN/NGF/ONECUT2/ERBB2/CNTNAP1/ITGB4/ALDH3A2/ERBB3/SCN8A/GPC1/CDK1/EGR2/PARD3/NDRG1/EGR3/AKT2/SIRT2/POU4F1/RUNX1/SOD1/SLC5A3	22
GO:0070646	protein modification by small protein removal	66/2886	300/18862	0.00121564	0.0176826	0.0142565	FOXO4/USP51/USP9X/USP42/COPS2/YOD1/TRAF3/HIF1A/NFKBIA/PSME1/UIMC1/ADRB2/PSMD6/RHOA/ZC3H12A/CDC20/MYSM1/USP1/TAB1/RIPK1/USP36/PSMD3/PSMC5/USP22/COPS3/UBB/PSMD2/RPS27A/SNX3/TNFAIP3/TOR1A/USP20/UBC/SUDS3/SART3/USP15/MBD6/INO80D/PSMD14/TANK/ZRANB1/STAMBPL1/CDK1/USP54/STAM/MYC/OTUD4/COPS4/JOSD2/UBA52/KEAP1/CYLD/SKP2/USPL1/USP12/USP25/ASXL1/SPATA2/PSMA7/ADRM1/USP2/BIRC3/TAF10/USP47/PSMC3/UBXN1	66
GO:0006977	DNA damage response, signal transduction by p53 class mediator resulting in cell cycle arrest	18/2886	56/18862	0.00122863	0.0177715	0.0143282	BTG2/CDC25C/CNOT4/PLK3/GADD45A/MUC1/RPL26/TFDP2/CDK1/ARID3A/CNOT1/RBL2/CCNB1/PLK2/RGCC/E2F1/AURKA/ATM	18
GO:1903322	positive regulation of protein modification by small protein conjugation or removal	35/2886	137/18862	0.00123235	0.0177715	0.0143282	DDX3X/ARRDC4/SPRTN/GNL3/PAXIP1/ZC3H12A/CDC20/BCL10/RWDD3/SPHK1/UBB/PELI1/TOPORS/HSPA5/CHFR/SART3/CRY1/LRRK2/CUL3/TANK/BTRC/BMI1/RIPK2/FBXW7/UBE2S/UBA2/PLK1/RPS2/ARRDC3/CDC20B/TRIB3/DCUN1D5/BIRC3/CTR9/TOLLIP	35
GO:1903793	positive regulation of anion transport	98/2886	478/18862	0.00123326	0.0177715	0.0143282	GPC3/ACSL4/MEF2A/ACHE/FIS1/ADAM8/CTDSPL2/CEMIP/CNST/SEC16B/RNASEL/DHX9/ADORA1/RAB29/TGFB2/TP53BP2/NRDE2/TGFB3/HIF1A/NFKBIA/SLC34A1/CASR/SLC38A3/SMO/ABCB4/EEPD1/UBE2J2/TP73/ATP13A2/ZC3H12A/PLK3/PDZK1/CHRNB2/ATF4/PMAIP1/TNFRSF11A/BCL2/HSPA1L/HSP90AB1/USP36/ERBB2/JUP/CDK5R1/MIEF2/TFDP2/PRKCE/FYN/GJA1/PTCH1/ANP32B/NR4A3/RAN/P2RX4/NR1H4/CEP290/LRP1/C2CD5/CREBL2/LPCAT3/ADIPOR2/CAPN10/PLA2R1/BAG3/TCF7L2…	98
GO:0031346	positive regulation of cell projection organization	74/2886	344/18862	0.00123631	0.0177742	0.0143303	PLXNA3/PLXNB3/STYXL1/SLIT2/LTK/BBS4/SEMA7A/ABL2/RGS2/TGFB3/NIN/FBXO38/ROBO2/PLXNA1/PLXND1/WNT5A/ZMYND10/RHOA/PLXNB1/EZH2/FZD1/ANLN/CAMK2B/AGRN/CROCC/MACF1/LRRC7/NGF/CDC42EP1/CUL7/VEGFA/NGFR/PLEKHM1/WNT3/ITGA3/NME2/SCARF1/SKIL/NLGN1/ALK/FAM98A/CDC42EP3/SNX3/FYN/FUT9/ROR2/HSPA5/ANAPC2/AVIL/LRP1/OBSL1/VIL1/ZFYVE27/ANKRD1/SCARB2/CEP135/EPS8L1/MEGF8/CRTC1/DEF8/FBXO31/ARSB/ENC1/MAP1B/OCLN/ITGA2/DZIP1/T…	74
GO:0046942	carboxylic acid transport	63/2886	284/18862	0.00124794	0.0178997	0.0144316	SLC16A2/SLC38A5/SLC7A8/SLC7A7/SLC26A1/AQP9/RGS2/PPFIA4/ADORA1/BDKRB2/SFXN1/SLC23A1/CASR/SLC6A6/SLC38A3/ABCB4/SLC35D1/ATP8B1/TNFRSF11A/SLC17A4/SLC17A1/SLC17A3/ABCC10/NFKBIE/SLC17A5/SLC16A3/SLC16A5/LLGL2/ABCC3/PROCA1/SLC46A1/SLC47A1/CTNS/SLCO2A1/SLC25A38/SLC3A1/SFXN5/GJA1/ANXA1/SLC1A1/SLC27A4/P2RX4/NR1H4/GLS2/SLC38A2/PER2/LRP2/PLA2R1/SFXN3/NCOA2/SLC7A11/PLA2G12A/PPFIA3/SLC1A5/SLC7A6/SLC38A7/ABCC6/A…	63
GO:0021591	ventricular system development	11/2886	27/18862	0.00126995	0.0180903	0.0145852	CENPF/NUMB/CELSR2/KIF27/ANP32B/KDM2B/DPCD/SLC7A11/RPGRIP1L/DNAH5/TSKU	11
GO:1901988	negative regulation of cell cycle phase transition	60/2886	268/18862	0.00127294	0.0180903	0.0145852	FOXO4/BTG2/CENPF/DACT1/PSME1/UIMC1/DUSP1/CDC25C/PSMD6/EZH2/CNOT4/HUS1/MIIP/CDC20/PLK3/CDKN2C/ORC1/GADD45A/MUC1/KLHL22/BCL2/PSMD3/CDC6/PSMC5/RPL26/AURKB/TFDP2/PSMD2/CTDSPL/BUB1/TTK/KLF4/CHFR/KNTC1/HMGA2/NABP1/PSMD14/CDK1/RAD21/JADE1/ATF5/KANK2/CDKN2D/ARID3A/FBXO31/CNOT1/RBL2/PLK1/CCNB1/PLK2/RGCC/PRMT2/E2F1/AURKA/PSMA7/ATM/WEE1/USP47/PSMC3/CDK2AP2	60
GO:0000819	sister chromatid segregation	47/2886	199/18862	0.00129112	0.0183066	0.0147596	HDAC8/KIF4A/PRC1/NCAPG/KIF23/NEK2/CENPF/REC8/DUSP1/CDC23/NCAPG2/PHF13/CDC20/KIF2C/KLHL22/CHMP6/CDC6/TOP2A/TUBG1/CDC27/AXIN2/SPAG5/AURKB/SMC4/BUB1/NCAPH/TTK/CHFR/RAN/KNTC1/RACGAP1/DIS3L2/CUL3/RAD21/RRS1/FBXW7/CENPE/CHMP2A/KIF22/PLK1/CCNB1/CHAMP1/PIBF1/ATM/KIF18A/INCENP/CDCA5	47
GO:1990830	cellular response to leukemia inhibitory factor	23/2886	79/18862	0.00129742	0.0183539	0.0147978	CACYBP/KDM5B/ABCD4/SRM/MTF2/PMM1/SYNGR1/SRSF3/TRIM25/SHMT1/EIF4A2/SRSF7/B3GNT2/KLF4/RARG/XRCC5/SIRT1/SPOCK2/PFKP/VEGFC/KLF5/MYBL2/FZD4	23
GO:0032210	regulation of telomere maintenance via telomerase	17/2886	52/18862	0.00134747	0.0188038	0.0151605	HNRNPC/NEK2/CCT6A/EXOSC10/CCT3/AURKB/CCT4/CCT7/TCP1/CCT2/XRCC5/PARN/CCT5/CCT8/SRC/ATM/NAT10	17
GO:0061512	protein localization to cilium	19/2886	61/18862	0.00138876	0.0192929	0.0155548	BBS4/RAB29/SPATA7/ARL13B/IFT122/ZMYND10/TTC26/CROCC/DZIP1L/IFT80/CCDC39/INVS/TCTN2/TCTN1/TULP3/TTC21B/RAB11FIP3/DZIP1/BBS1	19
GO:0072413	signal transduction involved in mitotic cell cycle checkpoint	19/2886	61/18862	0.00138876	0.0192929	0.0155548	ZWILCH/BTG2/CDC25C/CNOT4/PLK3/GADD45A/MUC1/RPL26/TFDP2/CDK1/ARID3A/CNOT1/RBL2/CCNB1/PLK2/RGCC/E2F1/AURKA/ATM	19
GO:0060213	positive regulation of nuclear-transcribed mRNA poly(A) tail shortening	7/2886	13/18862	0.00142427	0.0196536	0.0158456	BTG2/TNRC6B/EIF4ENIF1/AGO2/PABPC1/ZFP36/CNOT1	7
GO:0071287	cellular response to manganese ion	7/2886	13/18862	0.00142427	0.0196536	0.0158456	EIF2S1/ATP13A2/ATF4/EIF2AK3/HSPA5/LRRK2/BACE1	7
GO:1902043	positive regulation of extrinsic apoptotic signaling pathway via death domain receptors	7/2886	13/18862	0.00142427	0.0196536	0.0158456	THBS1/ATF3/FAF1/PEA15/PMAIP1/SKIL/STK3	7
GO:2001238	positive regulation of extrinsic apoptotic signaling pathway	16/2886	48/18862	0.00146689	0.0201452	0.016242	THBS1/AGT/ATF3/INHBA/FAF1/BCL10/PEA15/PMAIP1/RIPK1/PAK2/SKIL/ITM2C/STK3/DEDD2/DAPK3/CYLD	16
GO:0006278	RNA-dependent DNA biosynthetic process	22/2886	75/18862	0.00146967	0.0201452	0.016242	HNRNPC/TEP1/NEK2/HSP90AA1/CCT6A/EXOSC10/CCT3/HSP90AB1/AURKB/CCT4/CCT7/TCP1/CCT2/PTGES3/XRCC5/GAR1/PARN/CCT5/CCT8/SRC/ATM/NAT10	22
GO:1902930	regulation of alcohol biosynthetic process	22/2886	75/18862	0.00146967	0.0201452	0.016242	MBTPS2/DGKQ/HRH1/PTH1R/PMVK/FDPS/SEC14L2/FASN/RAN/ACACB/LPCAT3/GPAM/SCD/SQLE/FDFT1/NFKB1/MBTPS1/HMGCS1/SOD1/BMP2/TM7SF2/DHCR7	22
GO:2001252	positive regulation of chromosome organization	40/2886	164/18862	0.00151182	0.0206411	0.0166418	WDR61/NEK2/GNL3/PAXIP1/KMT2E/HNRNPA2B1/CCT6A/TAL1/MIER1/MTF2/MUC1/CCT3/PPP1R10/VEGFA/KAT7/TADA2A/AURKB/BCL6/CCT4/CCT7/TCP1/PHF19/SART3/CCT2/PPHLN1/LRRK2/XRCC5/SIRT1/RAD21/ING2/HNRNPD/PAF1/DNMT1/PARN/CCNB1/CCT5/MPHOSPH8/CCT8/ATM/CTR9	40
GO:0046395	carboxylic acid catabolic process	55/2886	243/18862	0.00152545	0.0206411	0.0166418	ABCD1/IVD/SLC27A2/NPL/ATP2B4/ABCD4/ALDH6A1/ARG2/HGD/ACOX2/AMT/CROT/ALDH4A1/HMGCL/MFSD2A/CPT2/DDAH1/HAO2/CPT1B/ECI2/ADTRP/ALDH5A1/AFMID/ALDH3A2/SHMT1/ASPA/MCCC1/XYLB/ACAT2/IDNK/SLC27A4/CEL/ACADS/ACACB/GLS2/CSAD/HIBCH/HOGA1/PCBD1/PHYH/GPT/PEX2/AADAT/AKT2/PRODH2/ILVBL/QPRT/ABAT/MCCC2/AMACR/CRYL1/FTCD/CBS/LPIN3/ACAD8	55
GO:0006670	sphingosine metabolic process	9/2886	20/18862	0.00152615	0.0206411	0.0166418	SPTLC2/SGPP1/GBA/SPHK1/SPTLC1/ACER2/ABCA2/ASAH1/SPTLC3	9
GO:0035999	tetrahydrofolate interconversion	6/2886	10/18862	0.00153475	0.0206411	0.0166418	MTHFR/SHMT1/MTHFD2/MTHFD1L/MTHFD2L/FTCD	6
GO:0036500	ATF6-mediated unfolded protein response	6/2886	10/18862	0.00153475	0.0206411	0.0166418	MBTPS2/ATF6B/HSPA5/DDIT3/CALR/MBTPS1	6
GO:0040015	negative regulation of multicellular organism growth	6/2886	10/18862	0.00153475	0.0206411	0.0166418	ADRB2/PTCH1/SOCS2/ADRB1/GDF15/BBS2	6
GO:1902237	positive regulation of endoplasmic reticulum stress-induced intrinsic apoptotic signaling pathway	6/2886	10/18862	0.00153475	0.0206411	0.0166418	PTPN2/PMAIP1/BCL2L11/DDIT3/SIRT1/SERINC3	6
GO:1904350	regulation of protein catabolic process in the vacuole	6/2886	10/18862	0.00153475	0.0206411	0.0166418	ATP13A2/GBA/MGAT3/LRP1/LRP2/LDLR	6
GO:0072431	signal transduction involved in mitotic G1 DNA damage checkpoint	18/2886	57/18862	0.00154258	0.0206411	0.0166418	BTG2/CDC25C/CNOT4/PLK3/GADD45A/MUC1/RPL26/TFDP2/CDK1/ARID3A/CNOT1/RBL2/CCNB1/PLK2/RGCC/E2F1/AURKA/ATM	18
GO:1902400	intracellular signal transduction involved in G1 DNA damage checkpoint	18/2886	57/18862	0.00154258	0.0206411	0.0166418	BTG2/CDC25C/CNOT4/PLK3/GADD45A/MUC1/RPL26/TFDP2/CDK1/ARID3A/CNOT1/RBL2/CCNB1/PLK2/RGCC/E2F1/AURKA/ATM	18
GO:0010833	telomere maintenance via telomere lengthening	23/2886	80/18862	0.00156157	0.0206727	0.0166673	HNRNPC/NEK2/HSP90AA1/HNRNPA2B1/CCT6A/ZBTB48/EXOSC10/CCT3/HSP90AB1/AURKB/CCT4/CCT7/TCP1/CCT2/PTGES3/XRCC5/GAR1/PARN/CCT5/CCT8/SRC/ATM/NAT10	23
GO:2001236	regulation of extrinsic apoptotic signaling pathway	38/2886	154/18862	0.00156166	0.0206727	0.0166673	DDX3X/SERPINE1/THBS1/AGT/ATF3/RAF1/INHBA/FAF1/BCL10/PEA15/HMOX1/PMAIP1/BCL2/RIPK1/HSPA1A/HSPA1B/PAK2/SKIL/FYN/TNFAIP3/PHIP/TRAF1/ITM2C/SCG2/STRADB/TCF7L2/ITPRIP/FAS/DEPTOR/STK3/IL7/FGFR1/TNFRSF10B/HMGB2/DEDD2/DAPK3/CYLD/SRC	38
GO:0043161	proteasome-mediated ubiquitin-dependent protein catabolic process	88/2886	425/18862	0.00156784	0.0207102	0.0166975	UBQLN2/KLHL15/SMURF1/UBR1/EDEM3/YOD1/PSME1/FBXW11/CSNK1A1/FBXO38/CDC23/FBXL17/RYBP/PSMD6/FBXL13/HECW1/UBE2J2/SPSB1/RPL11/RNF19B/CDC20/PLK3/FAF1/GBA/FOXRED2/RNF185/KLHL22/HSPA1A/HSPA1B/HSP90AB1/PSMD3/TMUB2/CDC27/PSMC5/TRIM25/UBB/AURKB/PSMD2/TRIB2/SOCS5/RPS27A/XPO1/PELI1/UFL1/MAN1A1/TOPORS/HSPA5/ANAPC2/CHFR/UBC/OS9/DDIT3/LRRK2/CUL3/ANKZF1/PSMD14/BTRC/CDK1/SIRT1/ANAPC16/DNAJB12/WAC/TRIB1/EIF3H/TMEM6…	88
GO:0035987	endodermal cell differentiation	15/2886	44/18862	0.00158198	0.0208524	0.0168122	MMP14/COL8A1/SETD2/LAMB1/INHBA/COL12A1/SOX2/HMGA2/ITGA4/DKK1/PAF1/COL4A2/COL6A1/ITGB2/CTR9	15
GO:0030902	hindbrain development	35/2886	139/18862	0.00161531	0.0212014	0.0170935	COX1/CKB/ARL13B/EZH2/SMO/HOXA2/PTBP2/GBA/NCSTN/SSTR3/BCL2/FOXC1/NOG/CDK5R1/SEZ6/HES1/SEMA4C/AHI1/AGTPBP1/HSPA5/KDM2B/CEP290/GLI1/GBX2/TBR1/NANOS1/EGR2/DLC1/HNRNPD/ATF5/RPGRIP1L/POU4F1/GART/FZD4/PAK1	35
GO:2000134	negative regulation of G1/S transition of mitotic cell cycle	31/2886	119/18862	0.0016273	0.0213135	0.0171839	BTG2/DACT1/CDC25C/EZH2/CNOT4/PLK3/CDKN2C/GADD45A/MUC1/BCL2/RPL26/TFDP2/CTDSPL/KLF4/CDK1/JADE1/KANK2/CDKN2D/ARID3A/FBXO31/CNOT1/RBL2/CCNB1/PLK2/RGCC/PRMT2/E2F1/AURKA/ATM/WEE1/CDK2AP2	31
GO:0006520	cellular amino acid metabolic process	71/2886	331/18862	0.00165688	0.021655	0.0174593	SLC16A2/SLC7A7/IVD/ATP2B4/ALDH6A1/ARG2/PSME1/NIT2/HGD/PSMD6/AMT/ASNS/DDC/MTHFR/AGMAT/ALDH4A1/HMGCL/CTPS1/DIO1/DDAH1/WARS2/ATF4/ALDH5A1/FN3K/AFMID/PSMD3/PSMC5/SHMT1/CTNS/ASPA/SRR/GMPS/MCCC1/PSMD2/ODC1/IYD/PSAT1/NR1H4/GLS2/CSAD/MARS2/HIBCH/PSMD14/ACADSB/HOGA1/PPA1/PCBD1/GPT/AZIN1/MSRA/AADAT/SLC7A11/SLC39A8/ENOPH1/MTHFD2L/BCAT2/PRODH2/ILVBL/ABAT/SERINC5/MCCC2/FTCD/CBS/GART/HNF4A/SERINC3/PSMA7/ACAD8/…	71
GO:1901605	alpha-amino acid metabolic process	45/2886	191/18862	0.00170101	0.0221382	0.0178489	SLC7A7/ATP2B4/ARG2/NIT2/HGD/AMT/ASNS/MTHFR/AGMAT/ALDH4A1/CTPS1/DDAH1/ATF4/ALDH5A1/AFMID/SHMT1/ASPA/SRR/GMPS/ODC1/IYD/PSAT1/NR1H4/GLS2/CSAD/ACADSB/HOGA1/PCBD1/GPT/AZIN1/MSRA/AADAT/SLC7A11/SLC39A8/ENOPH1/MTHFD2L/PRODH2/ILVBL/SERINC5/FTCD/CBS/GART/HNF4A/SERINC3/GLYAT	45
GO:0030166	proteoglycan biosynthetic process	19/2886	62/18862	0.00171956	0.0222858	0.0179678	HS6ST2/GLCE/NDST1/CHPF2/EXTL2/BCAN/XYLT2/HS3ST3B1/PXYLP1/CHST10/HS3ST5/DSE/CHST11/CHPF/TCF7L2/NDST2/EXTL3/VCAN/SLC2A10	19
GO:0031571	mitotic G1 DNA damage checkpoint	19/2886	62/18862	0.00171956	0.0222858	0.0179678	BTG2/CDC25C/CNOT4/PLK3/GADD45A/MUC1/RPL26/TFDP2/CDK1/ARID3A/FBXO31/CNOT1/RBL2/CCNB1/PLK2/RGCC/E2F1/AURKA/ATM	19
GO:0072395	signal transduction involved in cell cycle checkpoint	22/2886	76/18862	0.00177445	0.0229012	0.018464	ZWILCH/BTG2/UIMC1/CDC25C/CNOT4/PLK3/GADD45A/MUC1/CDC5L/RPL26/TFDP2/CDK1/ARID3A/CNOT1/RBL2/PLK1/CCNB1/PLK2/RGCC/E2F1/AURKA/ATM	22
GO:0001958	endochondral ossification	11/2886	28/18862	0.00180529	0.0231062	0.0186293	MMP14/FGFR3/FGF18/ALPL/MEF2D/FOXC1/IFT80/TMEM119/SMPD3/GNAS/INPPL1	11
GO:0010458	exit from mitosis	11/2886	28/18862	0.00180529	0.0231062	0.0186293	CDC23/ANLN/CDC14A/CLASP2/KNTC1/PPP2R2D/CHMP2A/UBE2S/SIRT2/RGCC/CDCA5	11
GO:1902253	regulation of intrinsic apoptotic signaling pathway by p53 class mediator	11/2886	28/18862	0.00180529	0.0231062	0.0186293	MSX1/BDKRB2/RPL11/MUC1/BCL2/UBB/RPL26/RPS7/HNRNPK/SIRT1/ING2	11
GO:1904029	regulation of cyclin-dependent protein kinase activity	28/2886	105/18862	0.00183485	0.023436	0.0188952	NR2F2/CDKN3/CDC25C/CCNL2/CDKN2C/GADD45A/TTBK1/HSP90AB1/CDC6/HEXIM2/CDK5R1/CCNL1/SPDYA/TNFAIP3/CNPPD1/GTPBP4/SERTAD1/CCNE1/CDKN2D/CDC37/PLK1/PKD1/CDK7/CCNB1/RGCC/LATS2/SRC/GTF2H1	28
GO:1903533	regulation of protein targeting	23/2886	81/18862	0.00187038	0.0236318	0.019053	FIS1/CEMIP/UBE2J2/PDZK1/HSPA1L/USP36/ERBB2/CDK5R1/MIEF2/PARL/FYN/SLC1A1/LRRK2/C2CD5/BAG3/ANK3/BNIP3L/DMTN/FBXW7/AKT2/PDCD5/ITGB2/PAK1	23
GO:1900180	regulation of protein localization to nucleus	33/2886	130/18862	0.0018716	0.0236318	0.019053	FERMT2/PARP9/DTX3L/SMO/CCT6A/ATP13A2/ZC3H12A/CCT3/BYSL/HSP90AB1/NGFR/JUP/KAT7/CCT4/CCT7/EIF2AK3/TCP1/FYN/RAN/CCT2/BAG3/SUFU/CDK1/UBR5/PLK1/GLIS2/CCT5/UFM1/LATS2/CCT8/MAVS/SRC/PKIG	33
GO:0043620	regulation of DNA-templated transcription in response to stress	30/2886	115/18862	0.00187197	0.0236318	0.019053	MBTPS2/ATF3/HIF1A/PSME1/EGR1/PSMD6/LIMD1/JUN/MUC1/ATF4/HMOX1/HSPA1A/ATF6B/VEGFA/PSMD3/PSMC5/UBB/PSMD2/RPS27A/HSPA5/UBC/DDIT3/TMBIM6/PSMD14/BAG3/SIRT2/UBA52/DNAJB1/PSMA7/PSMC3	30
GO:0001961	positive regulation of cytokine-mediated signaling pathway	16/2886	49/18862	0.00187311	0.0236318	0.019053	HIF1A/PARP9/PARP14/WNT5A/CSF1/RIPK1/HSPA1A/HSPA1B/TRIM32/AGPAT2/RIPK2/IL7/AXL/GAS6/MAVS/TRIM6	16
GO:0038066	p38MAPK cascade	16/2886	49/18862	0.00187311	0.0236318	0.019053	DUSP10/DUSP1/ZC3H12A/GADD45A/PHLPP1/VEGFA/SPHK1/LGALS9/MAP2K3/PER1/MINK1/EMC10/ZFP36/GADD45B/CYLD/BMP2	16
GO:0030512	negative regulation of transforming growth factor beta receptor signaling pathway	24/2886	86/18862	0.00195076	0.0245613	0.0198025	SMURF1/SMAD6/TGFB3/ONECUT2/HSPA1A/ZNF451/CD109/MTMR4/UBB/VEPH1/SKIL/EMILIN1/RPS27A/SPRED2/HSPA5/UBC/CHST11/LEMD3/SIRT1/UBA52/TGFB1I1/VASN/SLC2A10/PMEPA1	24
GO:1902904	negative regulation of supramolecular fiber organization	39/2886	161/18862	0.00196278	0.0246625	0.019884	HDAC6/MID1IP1/SLIT2/TJP1/CAMSAP2/CAPZA2/PFDN2/INPP5J/ARHGAP28/FLII/PAK2/CLASP2/EMILIN1/SPTBN1/TMSB10/KANK1/HIP1R/NAV3/AVIL/LIMA1/FKBP4/VIL1/ADD3/DMTN/DLC1/SHANK1/SPTBN4/LDLR/ARHGEF18/APC2/MAP1B/DYRK1A/TPX2/SPEF1/PFDN4/HSPA8/ARAP1/SSH3/PPFIA1	39
GO:0090190	positive regulation of branching involved in ureteric bud morphogenesis	8/2886	17/18862	0.00197202	0.0247282	0.019937	AGT/SIX4/SMO/WNT2B/VEGFA/NOG/PAX8/LGR4	8
GO:0010389	regulation of G2/M transition of mitotic cell cycle	47/2886	203/18862	0.00199199	0.0249282	0.0200982	FOXO4/HAUS4/PBX1/NEK2/CENPF/HSP90AA1/DYNC1H1/HSPA2/PSME1/HMMR/CDC25C/PSMD6/CEP41/PRKAR2B/HUS1/MIIP/ORC1/CDC7/CEP76/TUBB/PSMD3/CDC6/TUBG1/PSMC5/AURKB/CEP70/PSMD2/SSNA1/CEP290/HMGA2/NABP1/PSMD14/CDK1/RAD21/PLK4/CEP135/PLK1/CCNB1/CEP250/TPX2/AURKA/PSMA7/CEP164/ATM/USP47/CKAP5/PSMC3	47
GO:0050770	regulation of axonogenesis	37/2886	151/18862	0.00203644	0.0253816	0.0204638	PLXNA3/PLXNB3/SEMA4B/SLIT2/SEMA7A/NIN/ROBO2/PLXNA1/PLXND1/WNT5A/SEMA3B/RHOA/PLXNB1/SEMA3C/EPHB2/MACF1/NGF/SEMA6C/RTN4R/CDH2/KIAA0319/VEGFA/NGFR/WNT3/CDK5R1/PAK2/SKIL/SEMA4C/ANAPC2/LRP1/DIP2B/ZFYVE27/MEGF8/MAP1B/TIAM1/PAK1/MAP6	37
GO:0050657	nucleic acid transport	46/2886	198/18862	0.00205413	0.0254993	0.0205587	CPSF4/DHX9/NRDE2/NPM1/SETD2/NUP205/HNRNPA2B1/SRRM1/YBX1/SRSF11/NUP153/DDX39B/SRSF3/ALYREF/EIF4A3/SRSF1/SUPT6H/EIF5A/CPSF3/SRSF7/XPO1/RANBP2/QKI/MRPL18/TSC1/RAN/IWS1/WDR33/ARC/RRS1/ABCE1/SDAD1/G3BP2/YTHDC1/ZFP36/DDX39A/RPS15/SMG1/RNPS1/NUP155/U2AF1/NXT1/NUP98/CKAP5/NUP160/NXF1	46
GO:0050658	RNA transport	46/2886	198/18862	0.00205413	0.0254993	0.0205587	CPSF4/DHX9/NRDE2/NPM1/SETD2/NUP205/HNRNPA2B1/SRRM1/YBX1/SRSF11/NUP153/DDX39B/SRSF3/ALYREF/EIF4A3/SRSF1/SUPT6H/EIF5A/CPSF3/SRSF7/XPO1/RANBP2/QKI/MRPL18/TSC1/RAN/IWS1/WDR33/ARC/RRS1/ABCE1/SDAD1/G3BP2/YTHDC1/ZFP36/DDX39A/RPS15/SMG1/RNPS1/NUP155/U2AF1/NXT1/NUP98/CKAP5/NUP160/NXF1	46
GO:0043406	positive regulation of MAP kinase activity	52/2886	230/18862	0.0020648	0.0255804	0.0206241	DUSP9/ADAM8/THBS1/AGT/TGFB3/FGF18/IRAK2/WNT5A/EZH2/TP73/MAP3K6/GADD45A/PEA15/MAPK11/TAB1/TNFRSF11A/RIPK1/DAXX/VEGFA/ERBB2/MAP2K3/UBB/NEK10/ALK/RPS27A/CD24/ROR2/UBC/DUSP6/FRS2/MAP3K12/LRRK2/DUSP5/AVPI1/DKK1/CDK1/RIPK2/FGFR1/UBA52/GDF15/INSR/GADD45B/MAPK8IP3/GHR/TIAM1/SOD1/BMP2/SRC/FZD4/PAK1/RPS3/DRD4	52
GO:0044819	mitotic G1/S transition checkpoint	19/2886	63/18862	0.0021146	0.0260142	0.0209739	BTG2/CDC25C/CNOT4/PLK3/GADD45A/MUC1/RPL26/TFDP2/CDK1/ARID3A/FBXO31/CNOT1/RBL2/CCNB1/PLK2/RGCC/E2F1/AURKA/ATM	19
GO:0046173	polyol biosynthetic process	19/2886	63/18862	0.0021146	0.0260142	0.0209739	PPIP5K1/SPTLC2/GCH1/HRH1/IP6K2/PTH1R/AKR1B1/GBA/IP6K3/SPHK1/SPR/IPPK/SPTLC1/ACER2/ABCA2/IPMK/PCBD1/ASAH1/SPTLC3	19
GO:0060348	bone development	45/2886	193/18862	0.00211665	0.0260142	0.0209739	PHEX/MBTPS2/MMP14/FGFR3/MSX1/TGFB3/SH3PXD2B/FGF18/SMAD5/LOX/RHOA/PLXNB1/INSIG1/LRRC17/DHRS3/ALPL/TAL1/THBS3/MEF2D/FOXC1/AXIN2/CHAD/IFT80/IFT172/GJA1/NPR2/COL27A1/ENG/TRPV4/TMEM119/RARG/TULP3/FBXW7/PITX2/MEGF8/RPL13/ZFPM1/SMPD3/ASXL1/BMP2/SRC/GNAS/TSKU/SERPINH1/INPPL1	45
GO:0044774	mitotic DNA integrity checkpoint	28/2886	106/18862	0.00213617	0.0261629	0.0210937	FOXO4/BTG2/CDC25C/XPC/CNOT4/HUS1/PLK3/ORC1/GADD45A/MUC1/PPP1R10/CDC6/RPL26/TFDP2/HMGA2/ATF2/CDK1/ARID3A/FBXO31/CNOT1/RBL2/EME2/CCNB1/PLK2/RGCC/E2F1/AURKA/ATM	28
GO:0072073	kidney epithelium development	33/2886	131/18862	0.00214143	0.0261629	0.0210937	GPC3/SLIT2/SMAD6/AGT/PBX1/ARG2/SIX4/SMAD5/ROBO2/LAMB2/SMO/HEYL/WNT2B/WNT7B/BCL2/FOXC1/VEGFA/FOXJ1/NOG/HES1/PAX8/CD24/AHI1/PTCH1/MYC/KANK2/PKD1/FOXD1/GZF1/ASXL1/BMP2/LGR4/CAT	33
GO:0000075	cell cycle checkpoint	48/2886	209/18862	0.00214144	0.0261629	0.0210937	FOXO4/ZWILCH/BTG2/CENPF/UIMC1/DUSP1/CDC25C/XPC/CNOT4/HUS1/CDC20/PLK3/ORC1/GADD45A/MUC1/CDC45/KLHL22/PPP1R10/DDX39B/CDC5L/CDC6/BRIP1/RPL26/AURKB/TFDP2/BUB1/TTK/CHFR/KNTC1/CRY1/HMGA2/NABP1/ATF2/CDK1/WAC/ARID3A/FBXO31/CNOT1/RBL2/PLK1/EME2/CCNB1/PLK2/RGCC/E2F1/AURKA/ATM/WEE1	48
GO:0042326	negative regulation of phosphorylation	84/2886	407/18862	0.00217157	0.0264786	0.0213483	DUSP9/NR2F2/PRKAR1B/DGKQ/SLIT2/SMAD6/AGT/RGS2/PPP1R15B/DUSP10/BDKRB1/BDKRB2/DUSP1/NPM1/SPRY4/PPP2CA/PARP14/PRKAG2/PRKAR2B/INHBA/IGFBP3/ERRFI1/EPHB2/ZC3H12A/CDKN2C/GADD45A/ADAR/GBA/INPP5J/DUSP18/PTPN2/TRIM27/STK38/CD109/CHMP6/PIP4K2B/HEXIM2/CD300A/NOG/DUSP14/PAK2/SH3BP5/EIF4G1/CTDSPL/TRIB2/EMILIN1/SOCS5/SPRED2/CNKSR3/TNFAIP3/DNAJA1/ENG/DUSP6/LRRK2/DUSP16/PDCD4/DUSP5/ITPRIP/DKK1/SIRT1/DDIT4/PPIF/PA…	84
GO:0046596	regulation of viral entry into host cell	14/2886	41/18862	0.00220401	0.0267685	0.021582	LGALS1/TRIM38/TRIM27/TRIM10/TRIM26/TRIM25/LGALS9/PTX3/SNX3/HS3ST5/TRIM68/TRIM6/TRIM5/IFITM1	14
GO:0009267	cellular response to starvation	38/2886	157/18862	0.00225813	0.0273185	0.0220254	PIK3C2B/NUAK2/ATF3/EIF2S1/MAX/CPEB4/FNIP1/SLC38A3/PRKAG2/ASNS/MIOS/UPP1/ZC3H12A/MFSD2A/SLC2A1/JUN/WNT2B/GBA/IFI16/ATF4/PMAIP1/BCL2/PPM1D/EIF2AK3/FOXO3/HSPA5/SLC38A2/LRRK2/ITFG2/FAS/SIRT1/KLF10/GAS6/FOXO1/SIK1/HSPA8/SIK2/FADS1	38
GO:0001701	in utero embryonic development	71/2886	335/18862	0.00229025	0.027653	0.0222951	CHD8/NR2F2/MSX1/COPS2/ELF3/ETNK2/NEK2/VASH1/TGFB3/HIF1A/NDUFA2/SETD2/PTH1R/NCAPG2/SMO/SLC35E2B/WDTC1/GJB3/CCDC24/STIL/MYBPHL/WNT7B/TAB1/MAFF/FOXC1/BYSL/VEGFA/MAFG/KRT19/POLG2/NOG/SUPT6H/COPS3/SOX15/NXN/HES1/SKIL/BCL2L11/PNLDC1/RSPO3/PTCH1/ZFAND5/KLF4/TCTN1/CHST11/KRT8/CUL3/PTPN18/BMPR1A/STK3/HEY1/CHD7/PLK4/SEC24D/ELL/JUNB/KEAP1/RPL13/CNOT1/RPGRIP1L/RBBP6/ADCY9/PKD1/CCNB1/PELO/BMP2/C2CD3/ADM/CTR9/…	71
GO:0000028	ribosomal small subunit assembly	9/2886	21/18862	0.00231108	0.0277763	0.0223946	RPS14/RPS27/RPS10/RPL38/RPSA/XRCC5/RPS5/RPS19/RPS15	9
GO:0006260	DNA replication	61/2886	280/18862	0.00231395	0.0277763	0.0223946	TSPYL2/MCM7/CDAN1/CACYBP/DHX9/BAZ1A/PPP2CA/SRPK2/DBF4/HUS1/FAF1/ORC1/JUN/NFIA/CDC7/BCAR3/CDC45/RBBP8/POLI/HMGA1/BRPF3/PRIM2/ALYREF/CDC6/POLG2/RECQL5/KAT7/BRIP1/RPAIN/BCL6/REV3L/TTF1/CDK2AP1/NAP1L1/GLI1/ING4/POLL/CDK1/DDX21/MCM10/KIN/GTPBP4/MCM4/EREG/ANKRD17/CCNE1/NFIX/RNASEH2A/CHAF1A/WDR18/RBBP6/EME2/DACH1/CHAF1B/MGME1/MCM8/ATM/POLD3/SSRP1/FAM111A/POLA2	61
GO:1902229	regulation of intrinsic apoptotic signaling pathway in response to DNA damage	13/2886	37/18862	0.00234813	0.0280776	0.0226375	MUC1/BCL2/RPL26/SKIL/HNRNPK/TRIM32/SIRT1/ING2/TMEM161A/CDKN2D/TPT1/RPS3/USP47	13
GO:1902001	fatty acid transmembrane transport	16/2886	50/18862	0.00236923	0.0281419	0.0226893	ABCD1/MID1IP1/THBS1/ABCD4/PRKAG2/SLC2A1/CPT2/CPT1B/SLC1A1/ACACB/PER2/ACSL5/ACSL1/SLC7A11/AKT2/SLC38A7	16
GO:0010001	glial cell differentiation	48/2886	210/18862	0.00237227	0.0281419	0.0226893	SLC45A3/DUSP10/HDAC11/PPARG/LAMB2/RHEB/SMO/IL6/MXRA8/TP73/TAL1/CDKN2C/GBA/NCSTN/CDH2/TTBK1/ERBB2/NR1D1/CNTNAP1/ITGB4/NOG/RNF112/ASPA/HES1/SOX2/EIF2B5/NR2E1/HDAC2/ROR2/ABCA2/EIF2B1/LRP1/ERBB3/GPC1/CDK1/EGR2/PARD3/VIM/NDRG1/AKT2/SIRT2/LDLR/BACE2/SOD1/BMP2/SOX6/MYRF/CLCF1	48
GO:1902402	signal transduction involved in mitotic DNA damage checkpoint	18/2886	59/18862	0.00237627	0.0281419	0.0226893	BTG2/CDC25C/CNOT4/PLK3/GADD45A/MUC1/RPL26/TFDP2/CDK1/ARID3A/CNOT1/RBL2/CCNB1/PLK2/RGCC/E2F1/AURKA/ATM	18
GO:1902403	signal transduction involved in mitotic DNA integrity checkpoint	18/2886	59/18862	0.00237627	0.0281419	0.0226893	BTG2/CDC25C/CNOT4/PLK3/GADD45A/MUC1/RPL26/TFDP2/CDK1/ARID3A/CNOT1/RBL2/CCNB1/PLK2/RGCC/E2F1/AURKA/ATM	18
GO:0003151	outflow tract morphogenesis	21/2886	73/18862	0.00242682	0.0285764	0.0230396	SMAD6/TGFB2/HIF1A/ROBO2/PLXND1/WNT5A/SEMA3C/DHRS3/HEYL/FOXC1/VEGFA/FZD2/NOG/HES1/ENG/ATF2/LRP2/BMPR1A/FOXH1/PITX2/ZFPM1	21
GO:0072401	signal transduction involved in DNA integrity checkpoint	21/2886	73/18862	0.00242682	0.0285764	0.0230396	BTG2/UIMC1/CDC25C/CNOT4/PLK3/GADD45A/MUC1/CDC5L/RPL26/TFDP2/CDK1/ARID3A/CNOT1/RBL2/PLK1/CCNB1/PLK2/RGCC/E2F1/AURKA/ATM	21
GO:0072422	signal transduction involved in DNA damage checkpoint	21/2886	73/18862	0.00242682	0.0285764	0.0230396	BTG2/UIMC1/CDC25C/CNOT4/PLK3/GADD45A/MUC1/CDC5L/RPL26/TFDP2/CDK1/ARID3A/CNOT1/RBL2/PLK1/CCNB1/PLK2/RGCC/E2F1/AURKA/ATM	21
GO:0031112	positive regulation of microtubule polymerization or depolymerization	12/2886	33/18862	0.00245807	0.0286036	0.0230615	NIN/HSPA1A/HSPA1B/CDK5R1/CLIP1/TRPV4/NAV3/MAP1B/OCLN/PAK1/RPS3/CKAP5	12
GO:0000054	ribosomal subunit export from nucleus	7/2886	14/18862	0.00247381	0.0286036	0.0230615	NPM1/XPO1/RAN/RRS1/ABCE1/SDAD1/RPS15	7
GO:0003413	chondrocyte differentiation involved in endochondral bone morphogenesis	7/2886	14/18862	0.00247381	0.0286036	0.0230615	AXIN2/IFT80/COL27A1/RARG/SMPD3/TSKU/SERPINH1	7
GO:0010457	centriole-centriole cohesion	7/2886	14/18862	0.00247381	0.0286036	0.0230615	NEK2/NIN/CROCC/RTTN/CEP68/CEP135/CEP250	7
GO:0045986	negative regulation of smooth muscle contraction	7/2886	14/18862	0.00247381	0.0286036	0.0230615	RGS2/ADORA1/ADRB2/DOCK4/PRKG1/DOCK5/SOD1	7
GO:1905146	lysosomal protein catabolic process	7/2886	14/18862	0.00247381	0.0286036	0.0230615	ATP13A2/GBA/MGAT3/LRP1/LRP2/LDLR/TPP1	7
GO:0033119	negative regulation of RNA splicing	10/2886	25/18862	0.0024754	0.0286036	0.0230615	HNRNPA2B1/PTBP2/C1QBP/SRSF7/HNRNPK/SFSWAP/TMBIM6/PTBP1/RNPS1/DYRK1A	10
GO:2000050	regulation of non-canonical Wnt signaling pathway	10/2886	25/18862	0.0024754	0.0286036	0.0230615	GPC3/DACT1/WNT5A/IFT80/RSPO3/DKK1/PLEKHA4/DAB2/TIAM1/SPEF1	10
GO:0090175	regulation of establishment of planar polarity	29/2886	112/18862	0.00248968	0.0287149	0.0231513	GPC3/SMURF1/DAAM1/DACT1/PSME1/PSMD6/WNT5A/RHOA/FZD1/CELSR2/CELSR1/PKHD1/PSMD3/FZD2/PSMC5/PSMD2/RSPO3/ROR2/PSMD14/DKK1/FZD6/PLEKHA4/PARD6A/DAB2/TIAM1/SPEF1/PSMA7/FZD4/PSMC3	29
GO:0031116	positive regulation of microtubule polymerization	11/2886	29/18862	0.00251093	0.0288543	0.0232636	NIN/HSPA1A/HSPA1B/CDK5R1/CLIP1/NAV3/MAP1B/OCLN/PAK1/RPS3/CKAP5	11
GO:0010498	proteasomal protein catabolic process	97/2886	483/18862	0.00253112	0.0290304	0.0234056	F8A1/UBQLN2/KLHL15/SMURF1/UBR1/EDEM3/YOD1/PSME1/FBXW11/CSNK1A1/FBXO38/CDC23/FBXL17/RYBP/PSMD6/FBXL13/HECW1/UBE2J2/SPSB1/RPL11/RNF19B/CDC20/PLK3/FAF1/GBA/FOXRED2/RNF185/KLHL22/PMAIP1/HSPA1A/HSPA1B/HSP90AB1/OSBPL7/PSMD3/NR1D1/TMUB2/CDC27/PSMC5/TRIM25/UBB/AURKB/PSMD2/TRIB2/SOCS5/RPS27A/XPO1/PELI1/UFL1/MAN1A1/TOPORS/HSPA5/TOR1A/ANAPC2/CHFR/UBC/OS9/DDIT3/LRRK2/CUL3/ANKZF1/PSMD14/BTRC/CDK1/SIRT1/ANAPC1…	97
GO:0030177	positive regulation of Wnt signaling pathway	42/2886	179/18862	0.00257439	0.0293567	0.0236687	GPC3/DDX3X/DACT1/PSME1/PSMD6/WNT5A/MACF1/RNF220/PSMD3/JUP/WNT3/PSMC5/AXIN2/PSMD2/RSPO3/TNFAIP3/WNK2/ROR2/SPIN1/KANK1/NRARP/LRRK2/PSMD14/ZRANB1/DKK1/JRK/UBR5/NFKB1/TRPM4/PLEKHA4/DAPK3/ZBED3/DEPDC1B/DAB2/BMP2/SRC/PSMA7/DIXDC1/USP47/ARNTL/LGR4/PSMC3	42
GO:0035794	positive regulation of mitochondrial membrane permeability	19/2886	64/18862	0.00258331	0.0293567	0.0236687	BMF/TP53BP2/TP73/CHCHD10/PMAIP1/BCL2/HSPA1A/TMEM102/TFDP2/SLC35F6/BCL2L11/HEBP2/HIP1R/ATF2/PPIF/YWHAZ/BNIP3L/BBC3/E2F1	19
GO:0035914	skeletal muscle cell differentiation	19/2886	64/18862	0.00258331	0.0293567	0.0236687	COPS2/BTG2/ATF3/SIX4/EGR1/HEYL/MEF2D/MAFF/DDX5/NR1D2/FOXN2/GPC1/ANKRD1/EGR2/SAP30/EEF2/NLN/KLF5/ARNTL	19
GO:0051148	negative regulation of muscle cell differentiation	19/2886	64/18862	0.00258331	0.0293567	0.0236687	FOXO4/MSX1/RGS2/EZH2/HDAC5/TMEM119/FRS2/BHLHE41/PDCD4/DKK1/EREG/ANKRD17/DNMT1/PTBP1/FGF9/BMP2/NFATC2/PAK1/SOX6	19
GO:0060411	cardiac septum morphogenesis	19/2886	64/18862	0.00258331	0.0293567	0.0236687	SLIT2/SMAD6/TGFB2/ROBO2/WNT5A/SMO/SEMA3C/DHRS3/HEYL/RBM15/FZD2/NOG/HES1/ENG/LRP2/BMPR1A/HEY1/CHD7/ZFPM1	19
GO:0045727	positive regulation of translation	33/2886	133/18862	0.00278276	0.0314336	0.0253432	DDX3X/THBS1/LARP6/PKM/DHX9/SAMD4A/NPM1/IL6/RPL5/EIF3D/CTIF/DDX39B/EIF4A3/ERBB2/RPL26/EIF5A/C1QBP/PLD1/FXR1/EIF2B5/EIF4G1/HABP4/VIM/AGO2/PABPC1/HNRNPD/RPS9/BCL3/ELAVL1/EEF2/ITGA2/YTHDF1/NAT10	33
GO:0051216	cartilage development	43/2886	185/18862	0.00278641	0.0314336	0.0253432	FGFR3/EVC/MSX1/HIF1A/FGF18/SMAD5/WNT5A/HYAL1/PTH1R/HOXA3/WNT2B/THBS3/MEF2D/WNT7B/MEX3C/COL11A2/AXIN2/NOG/IFT80/PKDCC/EFEMP1/EIF2AK3/ROR2/COL27A1/TRPV4/CHST11/HMGA2/HOXC4/RARG/FRZB/HOXD3/BMPR1A/LOXL2/MAF/SMPD3/BBS2/PKD1/RUNX1/BMP2/GNAS/TSKU/SERPINH1/SOX6	43
GO:0048608	reproductive structure development	83/2886	405/18862	0.00281347	0.031681	0.0255427	MAMLD1/ZFX/MMP14/NR2F2/VGF/SLIT2/KDM5B/ETNK2/TGFB2/SERPINA5/VASH1/HIF1A/SIX4/REC8/ROBO2/PPARG/WNT5A/SETD2/INHBA/GJB3/AGO4/RBM15/WNT2B/WNT7B/PATZ1/BCL2/FOXC1/CUL7/VEGFA/HSP90AB1/KRT19/NOG/BRIP1/UBB/SOX15/HES1/TIPARP/PTX3/EIF2B5/BCL2L11/GJA1/RSPO3/PTCH1/ROR2/ANXA1/RPS6/HSPA5/DHX37/FRS2/GLI1/RARG/KRT8/DHH/VDR/PTPRN/IDH1/LRP2/SIRT1/STK3/HEY1/CHD7/TLR3/ING2/HMGB2/PLK4/EREG/AXL/JUNB/C3/PKD1/HMGCS1/FGF9…	83
GO:0001736	establishment of planar polarity	31/2886	123/18862	0.00284219	0.0318879	0.0257095	GPC3/SMURF1/DAAM1/DACT1/PSME1/PSMD6/WNT5A/RHOA/FZD1/CELSR2/CELSR1/PKHD1/PSMD3/FZD2/PSMC5/PSMD2/RSPO3/ROR2/PSMD14/DKK1/FZD6/INTU/PLEKHA4/PARD6A/RPGRIP1L/DAB2/TIAM1/SPEF1/PSMA7/FZD4/PSMC3	31
GO:0060071	Wnt signaling pathway, planar cell polarity pathway	28/2886	108/18862	0.0028674	0.0319262	0.0257403	GPC3/SMURF1/DAAM1/DACT1/PSME1/PSMD6/WNT5A/RHOA/FZD1/CELSR2/CELSR1/PSMD3/FZD2/PSMC5/PSMD2/RSPO3/ROR2/PSMD14/DKK1/FZD6/PLEKHA4/PARD6A/DAB2/TIAM1/SPEF1/PSMA7/FZD4/PSMC3	28
GO:0006406	mRNA export from nucleus	29/2886	113/18862	0.00286916	0.0319262	0.0257403	CPSF4/SETD2/NUP205/HNRNPA2B1/SRRM1/SRSF11/NUP153/DDX39B/SRSF3/ALYREF/EIF4A3/SRSF1/SUPT6H/EIF5A/CPSF3/SRSF7/RANBP2/IWS1/WDR33/YTHDC1/DDX39A/SMG1/RNPS1/NUP155/U2AF1/NXT1/NUP98/NUP160/NXF1	29
GO:0071427	mRNA-containing ribonucleoprotein complex export from nucleus	29/2886	113/18862	0.00286916	0.0319262	0.0257403	CPSF4/SETD2/NUP205/HNRNPA2B1/SRRM1/SRSF11/NUP153/DDX39B/SRSF3/ALYREF/EIF4A3/SRSF1/SUPT6H/EIF5A/CPSF3/SRSF7/RANBP2/IWS1/WDR33/YTHDC1/DDX39A/SMG1/RNPS1/NUP155/U2AF1/NXT1/NUP98/NUP160/NXF1	29
GO:0031345	negative regulation of cell projection organization	42/2886	180/18862	0.00287139	0.0319262	0.0257403	PLXNA3/PLXNB3/SEMA4B/CRMP1/SLIT2/SEMA7A/RAB29/SPOCK1/WNT5A/SEMA3B/RHOA/SEMA3C/EPHB2/SEMA6C/LGALS1/INPP5J/KREMEN1/RTN4R/KIAA0319/NGFR/WNT3/ITGA3/CDK5R1/NLGN1/SEMA4C/FYN/HDAC2/KANK1/TSC1/TCHP/TRPV4/LRP1/DIP2B/ADCY6/LRRK2/FKBP4/ITM2C/VIM/CDK10/EFNB2/TSKU/DENND5A	42
GO:1904356	regulation of telomere maintenance via telomere lengthening	18/2886	60/18862	0.0029174	0.0322266	0.0259826	HNRNPC/NEK2/HNRNPA2B1/CCT6A/EXOSC10/CCT3/AURKB/CCT4/CCT7/TCP1/CCT2/XRCC5/PARN/CCT5/CCT8/SRC/ATM/NAT10	18
GO:0051017	actin filament bundle assembly	37/2886	154/18862	0.00292638	0.0322266	0.0259826	BAIAP2L1/TJP1/TGFB3/FERMT2/PFN3/RHOA/ZYX/ESPN/ARHGEF10L/ASAP3/ARHGAP28/NEDD9/FSCN2/BAIAP2/SERPINF2/PAK2/CLASP2/MARCKS/TSC1/PAWR/LIMA1/CUL3/VIL1/MYO1B/SORBS1/PDLIM1/DMTN/DLC1/FHDC1/SHANK1/ARHGEF18/RGCC/SRC/PAK1/ARAP1/USH1C/PPFIA1	37
GO:0000377	RNA splicing, via transesterification reactions with bulged adenosine as nucleophile	79/2886	383/18862	0.00292946	0.0322266	0.0259826	SRPK3/RBM41/HNRNPC/BUD31/CPSF4/SRRT/AQR/PRDX6/DHX9/SRPK2/TRA2A/HNRNPA2B1/SPEN/SRRM1/YBX1/SRSF11/RBMXL1/PTBP2/RBM15/DDX20/SF3A1/SNRNP48/DDX39B/SRSF3/CDC5L/ALYREF/EIF4A3/RBFOX3/CWC25/DHX8/DDX5/JMJD6/SRSF1/C1QBP/PRPF8/FXR1/TRA2B/CPSF3/SRSF7/QKI/WTAP/HNRNPK/PRPF4/SFSWAP/RBM19/SART3/ZC3H10/WBP11/NCL/CWC22/WDR33/HNRNPH3/CCAR1/PUF60/KHDRBS3/PABPC1/TGS1/FRG1/HNRNPD/YTHDC1/NOVA2/DDX39A/ELAVL1/PTBP1/SF3B3/…	79
GO:0000398	mRNA splicing, via spliceosome	79/2886	383/18862	0.00292946	0.0322266	0.0259826	SRPK3/RBM41/HNRNPC/BUD31/CPSF4/SRRT/AQR/PRDX6/DHX9/SRPK2/TRA2A/HNRNPA2B1/SPEN/SRRM1/YBX1/SRSF11/RBMXL1/PTBP2/RBM15/DDX20/SF3A1/SNRNP48/DDX39B/SRSF3/CDC5L/ALYREF/EIF4A3/RBFOX3/CWC25/DHX8/DDX5/JMJD6/SRSF1/C1QBP/PRPF8/FXR1/TRA2B/CPSF3/SRSF7/QKI/WTAP/HNRNPK/PRPF4/SFSWAP/RBM19/SART3/ZC3H10/WBP11/NCL/CWC22/WDR33/HNRNPH3/CCAR1/PUF60/KHDRBS3/PABPC1/TGS1/FRG1/HNRNPD/YTHDC1/NOVA2/DDX39A/ELAVL1/PTBP1/SF3B3/…	79
GO:0006348	chromatin silencing at telomere	6/2886	11/18862	0.00294012	0.0322266	0.0259826	EZH2/CDC45/EZH1/DPY30/HAT1/SIRT2	6
GO:0021670	lateral ventricle development	6/2886	11/18862	0.00294012	0.0322266	0.0259826	NUMB/KDM2B/DPCD/RPGRIP1L/DNAH5/TSKU	6
GO:0035404	histone-serine phosphorylation	6/2886	11/18862	0.00294012	0.0322266	0.0259826	VRK1/MST1/AURKB/HMGA2/CCNB1/AURKA	6
GO:1990440	positive regulation of transcription from RNA polymerase II promoter in response to endoplasmic reticulum stress	6/2886	11/18862	0.00294012	0.0322266	0.0259826	MBTPS2/ATF3/ATF4/ATF6B/HSPA5/DDIT3	6
GO:0016579	protein deubiquitination	61/2886	283/18862	0.0029935	0.0326958	0.0263609	FOXO4/USP51/USP9X/USP42/YOD1/TRAF3/HIF1A/NFKBIA/PSME1/UIMC1/ADRB2/PSMD6/RHOA/ZC3H12A/CDC20/MYSM1/USP1/TAB1/RIPK1/USP36/PSMD3/PSMC5/USP22/UBB/PSMD2/RPS27A/SNX3/TNFAIP3/USP20/UBC/SUDS3/SART3/USP15/MBD6/INO80D/PSMD14/TANK/ZRANB1/STAMBPL1/CDK1/USP54/STAM/MYC/OTUD4/JOSD2/UBA52/KEAP1/CYLD/SKP2/USP12/USP25/ASXL1/SPATA2/PSMA7/ADRM1/USP2/BIRC3/TAF10/USP47/PSMC3/UBXN1	61
GO:0007223	Wnt signaling pathway, calcium modulating pathway	13/2886	38/18862	0.00307634	0.0334823	0.0269949	PDE6B/WNT5A/AGO4/AGO1/TNRC6B/FZD2/ROR2/TCF7L2/DKK1/AGO2/FZD6/PLCB1/FZD4	13
GO:0033273	response to vitamin	24/2886	89/18862	0.00319916	0.0346361	0.0279252	PHEX/SLC34A1/SPARC/CASR/PPARG/TRIM24/MTHFR/ALPL/PIM1/TRIM25/BRIP1/DNMT3A/VDR/KANK2/CDKN2D/EEF2/MAP1B/ITGA2/NNT/HMGCS1/GAS6/F7/HLCS/CAT	24
GO:0016241	regulation of macroautophagy	38/2886	160/18862	0.00320807	0.0346718	0.027954	UBQLN2/HDAC6/LAMTOR4/RAB3GAP2/SPTLC2/HIF1A/ADRB2/ATP6V1A/FYCO1/PRKAG2/RHEB/EXOC4/ATP13A2/GBA/HMOX1/NPC1/USP36/PIP4K2B/CDK5R1/SPTLC1/TSC1/ULK1/HSPB8/ATG101/LRRK2/GAPDH/BAG3/SIRT1/WAC/OPTN/NRBP2/RIPK2/ATP6V1H/BNIP3L/SCOC/SMG1/SNX5/UVRAG	38
GO:0042552	myelination	31/2886	124/18862	0.00324546	0.0349538	0.0281813	ABCD1/GALC/NCSTN/TYMP/GAL3ST1/ERBB2/CNTNAP1/ITGB4/ASPA/EIF2B5/EIF2AK3/QKI/TSC1/ABCA2/RNF10/RARG/SCN8A/DHH/GPC1/SCN2A/MARVELD1/EGR2/PARD3/NDRG1/AKT2/SIRT2/SERINC5/SOD1/BCAS1/CTSC/MYRF	31
GO:1902807	negative regulation of cell cycle G1/S phase transition	31/2886	124/18862	0.00324546	0.0349538	0.0281813	BTG2/DACT1/CDC25C/EZH2/CNOT4/PLK3/CDKN2C/GADD45A/MUC1/BCL2/RPL26/TFDP2/CTDSPL/KLF4/CDK1/JADE1/KANK2/CDKN2D/ARID3A/FBXO31/CNOT1/RBL2/CCNB1/PLK2/RGCC/PRMT2/E2F1/AURKA/ATM/WEE1/CDK2AP2	31
GO:0022618	ribonucleoprotein complex assembly	50/2886	224/18862	0.00326956	0.0349903	0.0282108	SRPK3/DHX9/EIF5/HSP90AA1/RPS14/DHX30/SRPK2/RPL11/AGO4/AGO1/RPL5/PTBP2/DDX20/RPS27/ADAR/EIF3D/SF3A1/DDX39B/RPS10/HSP90AB1/RPL38/SRSF1/PRPF8/RPSA/SFSWAP/RPLP0/RPL6/SART3/PTGES3/EIF4B/NOP2/XRCC5/EIF3A/PUF60/AGO2/EIF3H/RRS1/TGS1/YTHDC1/RPS5/RPL13A/RPS19/EIF3K/RPS15/BRIX1/NUFIP1/SNRPB/CRNKL1/PRPF6/ATM	50
GO:0021532	neural tube patterning	12/2886	34/18862	0.00327716	0.0349903	0.0282108	GPR161/ARL13B/SMO/HES1/DZIP1L/PTCH1/KDM2B/TCTN1/TULP3/GBX2/SUFU/RPGRIP1L	12
GO:0045880	positive regulation of smoothened signaling pathway	12/2886	34/18862	0.00327716	0.0349903	0.0282108	GPC3/EVC/ULK3/NDST1/TXNDC15/SMO/DCDC2/IFT172/GLI1/ARMC9/STK36/INTU	12
GO:0060760	positive regulation of response to cytokine stimulus	17/2886	56/18862	0.00328652	0.0350297	0.0282426	DHX9/HIF1A/PARP9/PARP14/WNT5A/CSF1/RIPK1/HSPA1A/HSPA1B/TRIM32/AGPAT2/RIPK2/IL7/AXL/GAS6/MAVS/TRIM6	17
GO:0048675	axon extension	29/2886	114/18862	0.00329678	0.0350786	0.028282	PLXNA3/USP9X/SEMA4B/SLIT2/SEMA7A/HSP90AA1/WNT5A/SEMA3B/LAMB2/SEMA3C/MACF1/SEMA6C/RTN4R/KIAA0319/VEGFA/HSP90AB1/WNT3/CDK5R1/SEMA4C/ANAPC2/ULK1/LRP1/DIP2B/ZFYVE27/VCL/DPYSL2/MEGF8/MAP1B/PAK1	29
GO:1903364	positive regulation of cellular protein catabolic process	36/2886	150/18862	0.00336781	0.0357729	0.0288417	UBQLN2/SMURF1/HSP90AA1/DACT1/CSNK1A1/VGLL4/RNF19B/CDC20/PLK3/FAF1/GBA/RNF185/HSPA1A/HSPA1B/OSBPL7/TRIB2/SOCS5/TNFAIP3/ABCA2/CHFR/LRP1/LRRK2/LRP2/TRIB1/FBXW7/SIRT2/LDLR/KEAP1/PLK1/PLK2/CDC20B/DAB2/TRIB3/AURKA/CTSC/PSMC3	36
GO:0046519	sphingoid metabolic process	9/2886	22/18862	0.00338542	0.0358367	0.0288932	SPTLC2/SGPP1/GBA/SPHK1/SPTLC1/ACER2/ABCA2/ASAH1/SPTLC3	9
GO:0007020	microtubule nucleation	11/2886	30/18862	0.00342354	0.0361166	0.0291189	TUBGCP5/NIN/TUBGCP6/RANBP9/HSPA1A/HSPA1B/CCDC57/TUBG1/CLASP2/TPX2/CKAP5	11
GO:1903961	positive regulation of anion transmembrane transport	18/2886	61/18862	0.00355729	0.0373365	0.0301024	GPC3/MEF2A/RNASEL/SLC34A1/NR4A3/C2CD5/CREBL2/ADIPOR2/CAPN10/ACSL5/SORBS1/AZIN1/CA2/ACSL1/AKT2/INSR/C3/OCLN	18
GO:0000723	telomere maintenance	38/2886	161/18862	0.00359279	0.0376451	0.0303512	HDAC8/HNRNPC/TEP1/NEK2/HSP90AA1/YLPM1/GNL3/HNRNPA2B1/HUS1/CCT6A/ZBTB48/EXOSC10/CCT3/XRCC6/PPP1R10/HSP90AB1/PRIM2/AURKB/SMC6/CCT4/CCT7/TCP1/CCT2/PTGES3/XRCC5/MYC/GAR1/HNRNPD/CCNE1/SMG1/PARN/CCT5/CCT8/SRC/ATM/POLD3/NAT10/POLA2	38
GO:0000375	RNA splicing, via transesterification reactions	79/2886	386/18862	0.00362566	0.0378612	0.0305254	SRPK3/RBM41/HNRNPC/BUD31/CPSF4/SRRT/AQR/PRDX6/DHX9/SRPK2/TRA2A/HNRNPA2B1/SPEN/SRRM1/YBX1/SRSF11/RBMXL1/PTBP2/RBM15/DDX20/SF3A1/SNRNP48/DDX39B/SRSF3/CDC5L/ALYREF/EIF4A3/RBFOX3/CWC25/DHX8/DDX5/JMJD6/SRSF1/C1QBP/PRPF8/FXR1/TRA2B/CPSF3/SRSF7/QKI/WTAP/HNRNPK/PRPF4/SFSWAP/RBM19/SART3/ZC3H10/WBP11/NCL/CWC22/WDR33/HNRNPH3/CCAR1/PUF60/KHDRBS3/PABPC1/TGS1/FRG1/HNRNPD/YTHDC1/NOVA2/DDX39A/ELAVL1/PTBP1/SF3B3/…	79
GO:0001658	branching involved in ureteric bud morphogenesis	16/2886	52/18862	0.0036909	0.0383165	0.0308925	GPC3/AGT/PBX1/SIX4/SMO/WNT2B/BCL2/VEGFA/NOG/PAX8/PTCH1/MYC/FOXD1/GZF1/BMP2/LGR4	16
GO:0035196	production of miRNAs involved in gene silencing by miRNA	16/2886	52/18862	0.0036909	0.0383165	0.0308925	SRRT/IL6/HNRNPA2B1/PUM1/AGO4/AGO1/ZC3H12A/ADAR/ZC3H7B/DGCR8/RIPK1/DDX5/PUM2/ZC3H10/BCDIN3D/AGO2	16
GO:0045637	regulation of myeloid cell differentiation	56/2886	258/18862	0.00369405	0.0383165	0.0308925	KLF13/THBS1/WDR61/HIF1A/NFKBIA/HSPA9/LOX/MITF/NCAPG2/KMT2C/CNOT4/KMT2E/LRRC17/INHBA/ISG15/AGO4/AGO1/TAL1/JUN/CSF1/RBM15/TNRC6B/ANKRD54/PTPN2/RIPK1/HSPA1A/HSPA1B/SMAP1/KAT7/NME2/GP1BA/DPY30/FOXO3/ROR2/NR4A3/RARG/INPP5D/ZNF16/MYC/TRIB1/KLF10/CA2/ASH2L/TLR3/HMGB2/FBXW7/ZFP36/PAF1/ZFPM1/POU4F1/RUNX1/L3MBTL1/FAM210B/GNAS/ETS1/CTR9	56
GO:0032465	regulation of cytokinesis	24/2886	90/18862	0.00374211	0.0387499	0.0312419	PRC1/KIF23/BBS4/RHOA/SETD2/KLHL21/PLK3/CDC14A/CDC6/CENPV/AURKB/PRKCE/RACGAP1/CUL3/KIF20B/PLK4/PLK1/SSTR5/RAB11FIP3/PLK2/KIF3B/AURKA/UVRAG/INCENP	24
GO:0048762	mesenchymal cell differentiation	51/2886	231/18862	0.00378984	0.0391131	0.0315348	EFNB1/SEMA4B/RADIL/MSX1/SEMA7A/TGFB2/TGFB3/HIF1A/FERMT2/PPP2CA/FBXL17/WNT5A/SEMA3B/EZH2/SMO/SEMA3C/IL6/HEYL/SEMA6C/CDH2/BCL2/FOXC1/CUL7/DDX5/AXIN2/NOG/HES1/CLASP2/SPRED2/SEMA4C/HDAC2/ENG/ALX1/HMGA2/GBX2/FRZB/TCF7L2/PDCD4/BMPR1A/HEY1/FGFR1/LOXL2/PITX2/HPN/TGFB1I1/VASN/DAB2/RGCC/TIAM1/BMP2/PHLDB1	51
GO:0006470	protein dephosphorylation	68/2886	325/18862	0.00386049	0.0397097	0.0320158	DUSP9/PPP1R3E/ELFN1/STYXL1/CTDSPL2/ADORA1/PPP1R15B/PTPN14/DUSP10/PTPN21/CDKN3/DUSP1/FBXW11/CDC25C/PPP2CA/PPM1M/IGFBP3/CAMTA1/CDC14A/GBA/ELFN2/DUSP18/PTPN2/PHLPP1/BCL2/PPP1R10/HSP90AB1/PTP4A1/CD300A/MTMR4/PPM1D/DUSP14/CTDSPL/PPM1G/PPP1CB/PPP6C/TSC1/PGAM5/DUSP6/PPP1R12A/PPM1H/LRRK2/DUSP16/PTPRN/CTDSP1/SLC39A10/PTPN18/PPP2R2D/LHPP/SHOC2/DUSP5/BTRC/PPP1R3C/MINPP1/CAMK2G/PPP1R16A/IKBKB/DUSP4/PPP2R2A/C…	68
GO:0046777	protein autophosphorylation	50/2886	226/18862	0.00394257	0.0404867	0.0326422	DDX3X/FGFR3/ULK3/NEK2/MARK3/VRK1/EIF2S1/CLK4/FGFR4/STK10/TRIM24/CAMK2B/ERRFI1/ATP13A2/DDR2/PIM3/RIPK1/PIM1/VEGFA/ERBB2/NME2/AURKB/MINK1/PAK2/NEK10/ALK/EIF2AK3/TTK/WNK2/ENG/ULK1/CAMKK2/MAP3K12/LRRK2/CLK1/STK17B/FGFR1/VEGFC/MOB1B/PRKCG/INSR/DAPK3/SMG1/SIK1/DYRK1A/SRC/AURKA/SIK2/ATM/PAK1	50
GO:0043001	Golgi to plasma membrane protein transport	13/2886	39/18862	0.00397821	0.0407849	0.0328826	CNST/AMN/RSC1A1/MACF1/PKDCC/SPTBN1/KRT18/ANK3/OPTN/BBS2/GGA2/SYS1/BBS1	13
GO:0006006	glucose metabolic process	47/2886	210/18862	0.00402879	0.0409757	0.0330365	PPP1R3E/MDH2/DGKQ/PGM2/PKM/SLC45A3/ATF3/NISCH/MST1/SLC35B4/PGAM2/IGFBP3/WDTC1/OMA1/LEPR/ATF4/PTPN2/PMAIP1/GAA/PDK2/ENO3/KHK/PPP1CB/GALM/RANBP2/ACACB/CRY1/GPD1/ENO2/GAPDH/PER2/SORBS1/PPP1R3C/SIRT1/HK1/PFKP/GPT/FABP5/NCOA2/AKT2/INSR/NLN/SIK1/SRC/SLC37A4/INPPL1/PC	47
GO:0061013	regulation of mRNA catabolic process	47/2886	210/18862	0.00402879	0.0409757	0.0330365	HNRNPC/RNASEL/DHX9/BTG2/SAMD4A/PSME1/NPM1/PSMD6/PUM1/ZC3H12A/YBX1/CSDC2/TNRC6B/EIF4ENIF1/HSPA1A/PSMD3/PSMC5/AXIN2/UBB/TNFSF13/FXR1/PSMD2/EIF4G1/PUM2/RPS27A/XPO1/UBC/GIGYF2/PSMD14/NANOS1/VIM/AGO2/YWHAZ/PABPC1/EXOSC9/HNRNPD/ZFP36/UBA52/ELAVL1/CNOT1/PARN/E2F1/PSMA7/YTHDF1/HSPA8/PSMC3/PKP3	47
GO:0032328	alanine transport	7/2886	15/18862	0.00402997	0.0409757	0.0330365	SLC38A5/SLC7A8/SLC6A6/SLC38A3/SLC38A2/SLC38A7/SLC3A2	7
GO:0060211	regulation of nuclear-transcribed mRNA poly(A) tail shortening	7/2886	15/18862	0.00402997	0.0409757	0.0330365	BTG2/TNRC6B/EIF4ENIF1/AGO2/PABPC1/ZFP36/CNOT1	7
GO:2000095	regulation of Wnt signaling pathway, planar cell polarity pathway	7/2886	15/18862	0.00402997	0.0409757	0.0330365	GPC3/DACT1/RSPO3/DKK1/PLEKHA4/DAB2/SPEF1	7
GO:0060828	regulation of canonical Wnt signaling pathway	61/2886	287/18862	0.00416499	0.0422791	0.0340874	GPC3/DDX3X/CHD8/CCDC88C/DACT1/PSME1/CSNK1A1/EGR1/PSMD6/WNT5A/LIMD1/CDK14/HECW1/RNF220/KREMEN1/CDH2/PSMD3/JUP/PSMC5/AXIN2/NOG/SOX2/PSMD2/RSPO3/WNK2/ROR2/KANK1/INVS/NRARP/SCYL2/DDIT3/GLI1/LRRK2/CUL3/FRZB/PSMD14/TCF7L2/BTRC/DKK1/JRK/FZD6/UBR5/STK3/JADE1/NFKB1/TRPM4/PLEKHA4/DAPK3/APC2/CYLD/ZBED3/DAB2/LATS2/BMP2/SRC/PSMA7/FZD4/USP47/ARNTL/LGR4/PSMC3	61
GO:0007272	ensheathment of neurons	31/2886	126/18862	0.00419931	0.0424879	0.0342557	ABCD1/GALC/NCSTN/TYMP/GAL3ST1/ERBB2/CNTNAP1/ITGB4/ASPA/EIF2B5/EIF2AK3/QKI/TSC1/ABCA2/RNF10/RARG/SCN8A/DHH/GPC1/SCN2A/MARVELD1/EGR2/PARD3/NDRG1/AKT2/SIRT2/SERINC5/SOD1/BCAS1/CTSC/MYRF	31
GO:0008366	axon ensheathment	31/2886	126/18862	0.00419931	0.0424879	0.0342557	ABCD1/GALC/NCSTN/TYMP/GAL3ST1/ERBB2/CNTNAP1/ITGB4/ASPA/EIF2B5/EIF2AK3/QKI/TSC1/ABCA2/RNF10/RARG/SCN8A/DHH/GPC1/SCN2A/MARVELD1/EGR2/PARD3/NDRG1/AKT2/SIRT2/SERINC5/SOD1/BCAS1/CTSC/MYRF	31
GO:1905897	regulation of response to endoplasmic reticulum stress	22/2886	81/18862	0.00422673	0.0426259	0.0343669	UBQLN2/MBTPS2/TMEM33/PPP1R15B/RNF185/PTPN2/PMAIP1/HSPA1A/ATF6B/EIF2AK3/BCL2L11/UFL1/HSPA5/DDIT3/TMBIM6/LRRK2/LPCAT3/SIRT1/USP25/SERINC3/NR1H3/UBXN1	22
GO:0043547	positive regulation of GTPase activity	83/2886	411/18862	0.00424213	0.0427115	0.034436	TBC1D8B/STARD8/RP2/ARAP2/TBC1D2B/RGS7/RGS2/SRGAP2/RAB3GAP2/EIF5/FERMT2/ARHGAP26/RAPGEF6/ARHGAP31/IQSEC1/WNT5A/PLXNB1/EZH2/DOCK4/AGRN/ERRFI1/EPHA2/ARHGEF10L/ASAP3/JUN/DEPDC1/BCAR3/ARHGAP29/PIP5K1A/ARHGEF11/RANGAP1/TBC1D10A/SGSM1/RANBP1/RTN4R/ARHGAP28/NEDD9/TBC1D22B/SMAP1/ERBB2/ARHGAP27/LLGL2/FOXJ1/ACAP1/ASAP2/RASGRP3/RANBP2/DOCK8/SLC27A4/TSC1/PGAM5/SRGAP1/RACGAP1/LRRK2/AGAP1/ZC3H15/DOCK1/ADRB1/ARH…	83
GO:1902099	regulation of metaphase/anaphase transition of cell cycle	18/2886	62/18862	0.00430909	0.0431049	0.0347531	CENPF/DUSP1/CDC23/CDC20/KLHL22/CDC6/CDC27/AURKB/BUB1/TTK/CHFR/KNTC1/CUL3/RAD21/CENPE/PLK1/CCNB1/ATM	18
GO:1902686	mitochondrial outer membrane permeabilization involved in programmed cell death	18/2886	62/18862	0.00430909	0.0431049	0.0347531	BMF/TP53BP2/TP73/CHCHD10/PMAIP1/BCL2/HSPA1A/TMEM102/TFDP2/SLC35F6/BCL2L11/HIP1R/ATF2/PPIF/YWHAZ/BNIP3L/BBC3/E2F1	18
GO:0010632	regulation of epithelial cell migration	62/2886	293/18862	0.00431803	0.0431245	0.0347689	SRPX2/HDAC6/NR2F2/SLIT2/THBS1/DLL4/DNAJA4/CTSH/AGT/ATP2B4/TGFB2/DUSP10/VASH1/HIF1A/FGF18/SPARC/HBEGF/IQSEC1/PPARG/ADAMTS9/WNT5A/HYAL1/RHOA/PIK3CD/EPHA2/ZC3H12A/MACF1/GADD45A/HMOX1/PATZ1/VEGFA/JUP/HDAC5/ITGA3/MAP2K3/CLASP2/RHOB/PRKCE/ATOH8/NR2E1/ANXA1/KLF4/SCARB1/P2RX4/VIL1/DOCK1/SIRT1/FGFR1/DOCK5/ANGPT2/VEGFC/FBXW7/ZNF580/EMC10/CALR/ARSB/PLK2/ITGA2/RGCC/STARD13/SRC/ETS1	62
GO:0019319	hexose biosynthetic process	24/2886	91/18862	0.00436024	0.043336	0.0349395	MDH2/DGKQ/ATF3/MST1/AKR1B1/SLC35B4/PGAM2/LEPR/ATF4/PTPN2/PDK2/ENO3/RANBP2/CRY1/GPD1/ENO2/GAPDH/PER2/SIRT1/GPT/NLN/SIK1/SLC37A4/PC	24
GO:0009063	cellular amino acid catabolic process	27/2886	106/18862	0.00438443	0.0434796	0.0350552	IVD/ATP2B4/ALDH6A1/ARG2/HGD/AMT/ALDH4A1/HMGCL/DDAH1/ALDH5A1/AFMID/SHMT1/ASPA/MCCC1/GLS2/CSAD/HIBCH/HOGA1/PCBD1/GPT/AADAT/PRODH2/ABAT/MCCC2/FTCD/CBS/ACAD8	27
GO:0043648	dicarboxylic acid metabolic process	25/2886	96/18862	0.00438875	0.0434796	0.0350552	MDH2/NIT2/MTHFR/ALDH4A1/ME2/ALDH5A1/ACLY/SLC46A1/SHMT1/ASPA/MTHFD2/MTHFD1L/NR1H4/GLS2/D2HGDH/IDH1/HOGA1/PHYH/AADAT/SLC7A11/MTHFD2L/PRODH2/QPRT/FTCD/SLC19A1	25
GO:0000079	regulation of cyclin-dependent protein serine/threonine kinase activity	26/2886	101/18862	0.00439589	0.0434806	0.0350561	NR2F2/CDKN3/CDC25C/CCNL2/CDKN2C/GADD45A/CDC6/HEXIM2/CDK5R1/CCNL1/SPDYA/TNFAIP3/CNPPD1/GTPBP4/SERTAD1/CCNE1/CDKN2D/CDC37/PLK1/PKD1/CDK7/CCNB1/RGCC/LATS2/SRC/GTF2H1	26
GO:0072001	renal system development	61/2886	288/18862	0.0045132	0.0445696	0.0359341	GPC3/SLIT2/SMAD6/CTSH/AGT/PBX1/CENPF/TGFB2/ARG2/SIX4/SLC34A1/EGR1/SMAD5/ROBO2/PLXND1/WNT5A/LAMB2/AKR1B1/SMO/TP73/HEYL/NFIA/WNT2B/PYGO2/WNT7B/IFT27/ZBTB14/BCL2/FOXC1/VEGFA/PKHD1/FOXJ1/JMJD6/ITGA3/NOG/HES1/TIPARP/PAX8/BCL2L11/CD24/AHI1/PTCH1/TSC1/CEP290/LRRK2/LRP2/EMX2/MYC/CA2/ANGPT2/KANK2/RPGRIP1L/GLIS2/PKD1/FOXD1/GZF1/ASXL1/BMP2/LGR4/CAT/NUP160	61
GO:0072078	nephron tubule morphogenesis	19/2886	67/18862	0.00453851	0.0447482	0.036078	GPC3/AGT/PBX1/SIX4/SMO/WNT2B/BCL2/VEGFA/NOG/HES1/PAX8/AHI1/PTCH1/MYC/PKD1/FOXD1/GZF1/BMP2/LGR4	19
GO:0045879	negative regulation of smoothened signaling pathway	11/2886	31/18862	0.00458347	0.0450477	0.0363195	GPC3/ULK3/GPR161/IFT122/IFT172/PTCH1/TULP3/SUFU/BTRC/MEGF8/GLIS2	11
GO:0071456	cellular response to hypoxia	46/2886	206/18862	0.00460438	0.0451575	0.036408	CPEB2/ADAM8/HIF1A/PSME1/EGR1/CASR/PSMD6/LIMD1/HILPDA/KCND2/PLK3/AK4/DDAH1/RWDD3/LMNA/HMOX1/PMAIP1/BCL2/VEGFA/PSMD3/PSMC5/BRIP1/UBB/PSMD2/DNMT3A/PRKCE/RPS27A/UBC/TMBIM6/SCN2A/PSMD14/ANKRD1/SIRT1/SUV39H2/NDRG1/MYC/BNIP3L/SIRT2/UBA52/VASN/CCNB1/RGCC/E2F1/SRC/PSMA7/PSMC3	46
GO:0046653	tetrahydrofolate metabolic process	8/2886	19/18862	0.00460945	0.0451575	0.036408	GCH1/MTHFR/SHMT1/MTHFD2/MTHFD1L/MTHFD2L/FTCD/GART	8
GO:0061572	actin filament bundle organization	37/2886	158/18862	0.00461655	0.0451575	0.036408	BAIAP2L1/TJP1/TGFB3/FERMT2/PFN3/RHOA/ZYX/ESPN/ARHGEF10L/ASAP3/ARHGAP28/NEDD9/FSCN2/BAIAP2/SERPINF2/PAK2/CLASP2/MARCKS/TSC1/PAWR/LIMA1/CUL3/VIL1/MYO1B/SORBS1/PDLIM1/DMTN/DLC1/FHDC1/SHANK1/ARHGEF18/RGCC/SRC/PAK1/ARAP1/USH1C/PPFIA1	37
GO:0002753	cytoplasmic pattern recognition receptor signaling pathway	20/2886	72/18862	0.00472023	0.0460986	0.0371668	NFKBIA/IRAK2/PUM1/TAB1/RIOK3/HSPA1A/HSPA1B/UBB/C1QBP/PUM2/RPS27A/TNFAIP3/UBC/USP15/RIPK2/ALPK1/ANKRD17/UBA52/CYLD/BIRC3	20
GO:0032967	positive regulation of collagen biosynthetic process	10/2886	27/18862	0.00477594	0.0463733	0.0373882	LARP6/SUCO/TGFB3/SERPINF2/HDAC2/ENG/VIM/ITGA2/RGCC/RUNX1	10
GO:0016578	histone deubiquitination	9/2886	23/18862	0.00481586	0.0463733	0.0373882	USP51/UIMC1/MYSM1/USP36/USP22/SART3/USP15/ASXL1/TAF10	9
GO:0021544	subpallium development	9/2886	23/18862	0.00481586	0.0463733	0.0373882	HPRT1/BBS4/FOXP2/INHBA/LRRK2/SLC7A11/BBS2/ZSWIM6/SLITRK5	9
GO:0045943	positive regulation of transcription by RNA polymerase I	9/2886	23/18862	0.00481586	0.0463733	0.0373882	HEATR1/ATF4/ERBB2/WDR43/EIF2AK3/IPPK/NCL/WDR75/UTP15	9
GO:0051457	maintenance of protein location in nucleus	9/2886	23/18862	0.00481586	0.0463733	0.0373882	BBS4/RANGAP1/CHCHD10/SYNE1/TOPORS/TXN/TAF3/BCL3/MORC3	9
GO:1904666	regulation of ubiquitin protein ligase activity	9/2886	23/18862	0.00481586	0.0463733	0.0373882	RPL11/CDC20/RPL5/RPL23/RPS7/BTRC/UBE2S/PLK1/CDC20B	9
GO:0030178	negative regulation of Wnt signaling pathway	47/2886	212/18862	0.00486761	0.0467987	0.0377312	GPC3/CHD8/CCDC88C/DACT1/PSME1/CSNK1A1/EGR1/VGLL4/PSMD6/WNT5A/LIMD1/HECW1/TRABD2B/KREMEN1/CDH2/PSMD3/PSMC5/AXIN2/NOG/NXN/IFT80/SOX2/PSMD2/ROR2/INVS/SCYL2/DDIT3/GLI1/LRP1/CUL3/FRZB/PSMD14/TCF7L2/DKK1/FZD6/STK3/JADE1/APC2/CYLD/DAB2/SHISA2/LATS2/BMP2/PSMA7/FZD4/TSKU/PSMC3	47
GO:0060675	ureteric bud morphogenesis	17/2886	58/18862	0.0049009	0.0470456	0.0379303	GPC3/AGT/PBX1/SIX4/SMO/WNT2B/BCL2/VEGFA/NOG/HES1/PAX8/PTCH1/MYC/FOXD1/GZF1/BMP2/LGR4	17
GO:1901264	carbohydrate derivative transport	22/2886	82/18862	0.00495897	0.0475292	0.0383202	ABCD1/SLC29A4/ADORA1/SLC35A4/SLC35A5/SLC35B4/RSC1A1/MFSD2A/SLC35D1/SLC35A3/SLC17A3/SLC35B1/ABCC3/PRKCE/GJA1/SLC35A1/SLC25A25/SCARB1/SLC25A42/ABCC6/SLC19A1/SLC37A4	22
GO:0006417	regulation of translation	85/2886	425/18862	0.00502212	0.0480376	0.0387301	DDX3X/CPEB2/THBS1/LARP6/PKM/IREB2/DHX9/RGS2/BTG2/PPP1R15B/EIF5/EIF2S1/SAMD4A/CPEB4/NPM1/RPS14/ETF1/EEFSEC/IL6/PUM1/AGO4/AGO1/ZC3H12A/YBX1/RPL5/TNRC6B/ATF4/EIF3D/EIF4ENIF1/CTIF/DDX39B/EIF4A3/ERBB2/GRB7/RPL38/SHMT1/RPL26/PER1/EIF5A/C1QBP/EIF4A2/PLD1/FXR1/EIF2B5/EIF4G1/PUM2/EIF2AK3/QKI/FOXO3/HABP4/TSC1/EIF2B1/PA2G4/EIF4B/GAPDH/PER2/GIGYF2/EIF4E2/NCL/IGFBP5/NANOS1/EIF4EBP2/VIM/AGO2/EIF3H/PABPC1/HNRNP…	85
GO:1901989	positive regulation of cell cycle phase transition	27/2886	107/18862	0.00502755	0.0480376	0.0387301	DDX3X/PBX1/DYRK3/HSPA2/NPM1/CDC25C/CDC23/HYAL1/EZH2/KMT2E/CDC7/CDC6/CDC27/STXBP4/EIF4G1/ANXA1/GLI1/CUL3/CDK1/ZNF16/ANKRD17/PAF1/CDK10/CCNB1/RGCC/PLCB1/CDCA5	27
GO:0044773	mitotic DNA damage checkpoint	26/2886	102/18862	0.00505924	0.0481914	0.0388541	FOXO4/BTG2/CDC25C/XPC/CNOT4/HUS1/PLK3/GADD45A/MUC1/PPP1R10/RPL26/TFDP2/HMGA2/ATF2/CDK1/ARID3A/FBXO31/CNOT1/RBL2/EME2/CCNB1/PLK2/RGCC/E2F1/AURKA/ATM	26
GO:0070423	nucleotide-binding oligomerization domain containing signaling pathway	13/2886	40/18862	0.00508207	0.0482602	0.0389095	NFKBIA/IRAK2/TAB1/HSPA1A/HSPA1B/UBB/RPS27A/TNFAIP3/UBC/RIPK2/UBA52/CYLD/BIRC3	13
GO:0006563	L-serine metabolic process	6/2886	12/18862	0.00512299	0.0482881	0.0389321	SHMT1/SRR/PSAT1/SERINC5/CBS/SERINC3	6
GO:0072520	seminiferous tubule development	6/2886	12/18862	0.00512299	0.0482881	0.0389321	REC8/BRIP1/UBB/ING2/SPATA2/KIF18A	6
GO:0097201	negative regulation of transcription from RNA polymerase II promoter in response to stress	6/2886	12/18862	0.00512299	0.0482881	0.0389321	JUN/HSPA1A/TMBIM6/BAG3/SIRT2/DNAJB1	6
GO:0006654	phosphatidic acid biosynthetic process	15/2886	49/18862	0.00512407	0.0482881	0.0389321	DGKQ/LPCAT4/ABHD5/PLD1/LIPH/DGKG/AGPAT2/NR1H4/GPD1/DGKD/GPAM/AGPAT5/PLA2G12A/DGKH/AGPAT3	15
GO:0051222	positive regulation of protein transport	65/2886	312/18862	0.00514401	0.0484022	0.0390241	ACSL4/ACHE/FIS1/ADAM8/CTDSPL2/CEMIP/CNST/SEC16B/RAB29/TGFB2/TP53BP2/TGFB3/HIF1A/CASR/SMO/UBE2J2/TP73/ATP13A2/ZC3H12A/PLK3/PDZK1/PMAIP1/BCL2/HSPA1L/HSP90AB1/USP36/ERBB2/JUP/CDK5R1/MIEF2/TFDP2/PRKCE/FYN/GJA1/ANP32B/RAN/NR1H4/CEP290/LRP1/C2CD5/CAPN10/BAG3/TCF7L2/ANKRD1/KIF20B/ANK3/KIF5B/UBR5/YWHAZ/VEGFC/FBXW7/TRPM4/BBC3/AKT2/PDCD5/PARD6A/OXCT1/GAS6/XPO4/ITGB2/E2F1/MAVS/SRC/PAK1/CHRM1	65
GO:0090092	regulation of transmembrane receptor protein serine/threonine kinase signaling pathway	54/2886	251/18862	0.00519723	0.0487546	0.0393082	GPC3/SMURF1/MSX1/THBS1/CTDSPL2/SMAD6/TGFB2/TGFB3/LOX/NREP/PPARG/WNT5A/INHBA/NBL1/ONECUT2/KIAA0319/HSPA1A/HSP90AB1/ZNF451/CD109/ITGA3/NOG/MTMR4/UBB/HES1/VEPH1/SKIL/EMILIN1/RPS27A/SPRED2/TTK/HSPA5/ENG/UBC/CHST11/LEMD3/LRP2/DKK1/SIRT1/BMPR1A/ING2/LTBP4/UBA52/GDF15/TGFB1I1/SH2B1/VASN/FOXD1/PELO/DAB2/LATS2/BMP2/SLC2A10/PMEPA1	54
GO:0043583	ear development	45/2886	202/18862	0.00526193	0.0492867	0.0397372	MSX1/TGFB2/TGFB3/SIX4/SPARC/LRIG1/WNT5A/INSIG1/HOXA2/EPHB2/MYCL/IFT27/CECR2/TTC39C/ATP8B1/BCL2/TSHZ1/SLC44A4/SLC25A27/TCAP/FZD2/RPL38/NOG/HES1/SOX2/PAX8/BCL2L11/AHI1/ROR2/ANP32B/TPRN/CEP290/LRIG3/GBX2/FRZB/PDZD7/FZD6/CHD7/HPN/MAF/RPGRIP1L/SOD1/BMP2/TSKU/USH1C	45
GO:0032479	regulation of type I interferon production	31/2886	128/18862	0.00537971	0.0501984	0.0404722	DDX3X/TRIM56/DHX9/TRAF3/HSP90AA1/IRF1/UBA7/SETD2/ISG15/POLR3C/IFI16/XRCC6/RIOK3/TRIM25/REL/TNFAIP3/TRIM32/STAT6/XRCC5/HSPD1/NFKB2/RIPK2/TLR3/HMGB2/NFKB1/RELB/IRF8/CYLD/POLR3F/MAVS/RNF26	31
GO:0045685	regulation of glial cell differentiation	19/2886	68/18862	0.00541315	0.0503977	0.0406329	SLC45A3/DUSP10/PPARG/RHEB/IL6/TP73/TTBK1/NR1D1/NOG/RNF112/ASPA/HES1/NR2E1/HDAC2/CDK1/EGR2/LDLR/BMP2/CLCF1	19
GO:0042476	odontogenesis	30/2886	123/18862	0.00548819	0.0510195	0.0411343	PHEX/FAM20C/SERPINE1/MSX1/TGFB2/TGFB3/SLC34A1/SMO/LAMB1/INHBA/ALPL/CSF1/TUFT1/FOXC1/NGFR/AXIN2/BCL2L11/HDAC2/ATF2/BMPR1A/CA2/PITX2/ENAM/SMPD3/ROGDI/FOXO1/BMP2/SRC/RELT/ADM	30
GO:1905515	non-motile cilium assembly	16/2886	54/18862	0.00556464	0.0516152	0.0416145	BBS4/CEP350/TTC8/ARL13B/IFT122/IFT80/IFT172/INTU/CEP135/BBS2/RPGRIP1L/PIBF1/CEP250/C2CD3/BBS1/TMEM80	16
GO:0014037	Schwann cell differentiation	12/2886	36/18862	0.005571	0.0516152	0.0416145	LAMB2/CNTNAP1/ITGB4/ERBB3/GPC1/CDK1/EGR2/PARD3/NDRG1/AKT2/SIRT2/SOD1	12
GO:0021766	hippocampus development	20/2886	73/18862	0.00558566	0.0516152	0.0416145	PLXNA3/BBS4/BTG2/ATP2B4/EZH2/SMO/MFSD2A/BCAN/ATAT1/EZH1/CDK5R1/KDM6B/ALK/NR2E1/TSC1/EMX2/KIF5B/BBS2/XRN2/TSKU	20
GO:0033143	regulation of intracellular steroid hormone receptor signaling pathway	20/2886	73/18862	0.00558566	0.0516152	0.0416145	HDAC6/HEYL/DDX5/PER1/UFL1/CRY1/GPAM/SIRT1/FOXH1/CALR/KANK2/CNOT1/DAB2/UFM1/PRMT2/RUNX1/SRC/PAK1/TRIM68/ARNTL	20
GO:0085029	extracellular matrix assembly	14/2886	45/18862	0.00574909	0.0528882	0.0426409	THSD4/AGT/LOX/LAMB2/LAMB1/CLASP2/PXDN/EMILIN1/ANTXR1/NTN4/SMPD3/GAS6/RGCC/PHLDB1	14
GO:0001822	kidney development	59/2886	280/18862	0.00578037	0.053097	0.0428092	GPC3/SLIT2/SMAD6/CTSH/AGT/PBX1/CENPF/TGFB2/ARG2/SIX4/SLC34A1/EGR1/SMAD5/ROBO2/PLXND1/WNT5A/LAMB2/AKR1B1/SMO/TP73/HEYL/WNT2B/PYGO2/WNT7B/IFT27/ZBTB14/BCL2/FOXC1/VEGFA/PKHD1/FOXJ1/JMJD6/ITGA3/NOG/HES1/TIPARP/PAX8/BCL2L11/CD24/AHI1/PTCH1/TSC1/CEP290/LRRK2/LRP2/MYC/CA2/ANGPT2/KANK2/RPGRIP1L/GLIS2/PKD1/FOXD1/GZF1/ASXL1/BMP2/LGR4/CAT/NUP160	59
GO:0046822	regulation of nucleocytoplasmic transport	26/2886	103/18862	0.00580401	0.053235	0.0429205	CTDSPL2/DHX9/PTPN14/NRDE2/SETD2/SMO/ZC3H12A/RANGAP1/NUP153/HSP90AB1/JUP/SUPT6H/ANP32B/TXN/RAN/PPP1R12A/IWS1/BAG3/TCF7L2/SUFU/UBR5/GAS6/UFM1/XPO4/MAVS/PKIG	26
GO:0006094	gluconeogenesis	23/2886	88/18862	0.00583927	0.0533211	0.0429899	MDH2/DGKQ/ATF3/MST1/SLC35B4/PGAM2/LEPR/ATF4/PTPN2/PDK2/ENO3/RANBP2/CRY1/GPD1/ENO2/GAPDH/PER2/SIRT1/GPT/NLN/SIK1/SLC37A4/PC	23
GO:0060993	kidney morphogenesis	23/2886	88/18862	0.00583927	0.0533211	0.0429899	GPC3/AGT/PBX1/SIX4/SMO/WNT2B/WNT7B/BCL2/VEGFA/FOXJ1/NOG/HES1/PAX8/AHI1/PTCH1/LRRK2/MYC/PKD1/FOXD1/GZF1/ASXL1/BMP2/LGR4	23
GO:0030071	regulation of mitotic metaphase/anaphase transition	17/2886	59/18862	0.00592278	0.053766	0.0433486	CENPF/DUSP1/CDC23/CDC20/KLHL22/CDC6/CDC27/AURKB/BUB1/TTK/KNTC1/CUL3/RAD21/CENPE/PLK1/CCNB1/ATM	17
GO:0072171	mesonephric tubule morphogenesis	17/2886	59/18862	0.00592278	0.053766	0.0433486	GPC3/AGT/PBX1/SIX4/SMO/WNT2B/BCL2/VEGFA/NOG/HES1/PAX8/PTCH1/MYC/FOXD1/GZF1/BMP2/LGR4	17
GO:1902041	regulation of extrinsic apoptotic signaling pathway via death domain receptors	17/2886	59/18862	0.00592278	0.053766	0.0433486	DDX3X/SERPINE1/THBS1/ATF3/RAF1/FAF1/PEA15/HMOX1/PMAIP1/RIPK1/SKIL/TNFAIP3/ITPRIP/FAS/STK3/TNFRSF10B/HMGB2	17
GO:0048333	mesodermal cell differentiation	11/2886	32/18862	0.00603433	0.0546182	0.0440357	INHBA/TAL1/ITGB4/ITGA3/KDM6B/GJA1/KLF4/HMGA2/DKK1/BMPR1A/ITGA2	11
GO:0048841	regulation of axon extension involved in axon guidance	11/2886	32/18862	0.00603433	0.0546182	0.0440357	PLXNA3/SEMA4B/SEMA7A/WNT5A/SEMA3B/SEMA3C/SEMA6C/VEGFA/WNT3/SEMA4C/MEGF8	11
GO:0032606	type I interferon production	31/2886	129/18862	0.00606709	0.0548345	0.0442101	DDX3X/TRIM56/DHX9/TRAF3/HSP90AA1/IRF1/UBA7/SETD2/ISG15/POLR3C/IFI16/XRCC6/RIOK3/TRIM25/REL/TNFAIP3/TRIM32/STAT6/XRCC5/HSPD1/NFKB2/RIPK2/TLR3/HMGB2/NFKB1/RELB/IRF8/CYLD/POLR3F/MAVS/RNF26	31
GO:0061136	regulation of proteasomal protein catabolic process	41/2886	182/18862	0.00612242	0.0552537	0.044548	F8A1/UBQLN2/PSME1/CSNK1A1/RYBP/RPL11/RNF19B/CDC20/PLK3/GBA/RNF185/HSPA1A/HSPA1B/HSP90AB1/OSBPL7/UBB/TRIB2/SOCS5/XPO1/UFL1/CHFR/LRRK2/PSMD14/BTRC/WAC/TRIB1/EIF3H/FBXW7/PRKCG/SIRT2/KEAP1/PLK1/PKD1/PLK2/CDC20B/DAB2/USP25/TRIB3/AURKA/PSMC3/UBXN1	41
GO:0000209	protein polyubiquitination	69/2886	337/18862	0.0061677	0.0553126	0.0445956	HDAC6/DDX3X/SMURF1/TRIM56/TRAF3/PSME1/FBXW11/FBXO38/CDC23/TRIM36/FBXL17/DZIP3/DTX3L/PSMD6/FBXL13/HECW1/UBE2D4/UBE2J2/SPSB1/RNF19B/UBE2Q1/PPIL2/BCL2/TRIM38/TRIM27/PSMD3/CDC27/PSMC5/UBB/ANAPC13/PSMD2/RPS27A/PELI1/TNFAIP3/FBXO30/SHPRH/TOPORS/TRIM32/TRAF1/ANAPC2/CHFR/UBC/UBE3B/TRIP12/CUL3/PSMD14/BTRC/HECTD2/PARP10/UBR5/LONRF1/TRIM2/FBXW7/UBE2S/IRF2BP1/UBA52/FBXW9/FBXO31/FBXL19/RBBP6/FBXL16/SKP2/NHLRC…	69
GO:0044784	metaphase/anaphase transition of cell cycle	18/2886	64/18862	0.00620568	0.0553126	0.0445956	CENPF/DUSP1/CDC23/CDC20/KLHL22/CDC6/CDC27/AURKB/BUB1/TTK/CHFR/KNTC1/CUL3/RAD21/CENPE/PLK1/CCNB1/ATM	18
GO:0007096	regulation of exit from mitosis	7/2886	16/18862	0.00622737	0.0553126	0.0445956	CDC23/ANLN/CDC14A/KNTC1/SIRT2/RGCC/CDCA5	7
GO:0043981	histone H4-K5 acetylation	7/2886	16/18862	0.00622737	0.0553126	0.0445956	JADE2/KANSL1/KAT7/KANSL2/ING4/JADE1/PHF20	7
GO:0043982	histone H4-K8 acetylation	7/2886	16/18862	0.00622737	0.0553126	0.0445956	JADE2/KANSL1/KAT7/KANSL2/ING4/JADE1/PHF20	7
GO:0061450	trophoblast cell migration	7/2886	16/18862	0.00622737	0.0553126	0.0445956	VEGFA/ITGB4/C1QBP/GJA1/AGO2/SYDE1/CALR	7
GO:0061684	chaperone-mediated autophagy	7/2886	16/18862	0.00622737	0.0553126	0.0445956	HSP90AA1/ATP13A2/PLK3/EEF1A1/BAG3/EEF1A2/HSPA8	7
GO:0071901	negative regulation of protein serine/threonine kinase activity	34/2886	145/18862	0.00628775	0.0557593	0.0449557	DUSP9/NR2F2/PRKAR1B/AGT/RGS2/DUSP10/DUSP1/SPRY4/PPP2CA/PRKAG2/PRKAR2B/CDKN2C/GADD45A/GBA/DUSP18/STK38/HEXIM2/CD300A/DUSP14/SPRED2/TNFAIP3/DNAJA1/DUSP6/DUSP16/PDCD4/DUSP5/SIRT1/DUSP4/CDKN2D/PLK1/LATS2/PKIG/CHORDC1/DUSP8	34
GO:0030490	maturation of SSU-rRNA	15/2886	50/18862	0.00630472	0.0557593	0.0449557	HEATR1/RPS14/SRFBP1/RPS8/WDR3/RIOK3/RIOK1/BYSL/DHX37/RRS1/RPS19/RPS16/FAM207A/RPS21/NAT10	15
GO:0031113	regulation of microtubule polymerization	15/2886	50/18862	0.00630472	0.0557593	0.0449557	CAMSAP2/NIN/INPP5J/HSPA1A/HSPA1B/CDK5R1/CLIP1/NAV3/FKBP4/MAP1B/OCLN/DYRK1A/PAK1/RPS3/CKAP5	15
GO:0034470	ncRNA processing	80/2886	400/18862	0.00633953	0.0558753	0.0450492	UTP14A/ISG20/CPSF4/SRRT/HEATR1/RNASEL/TRMT1L/RPS14/SRFBP1/TSEN2/RRP9/RPL14/IL6/HNRNPA2B1/EXOSC10/RPL11/ZBTB8OS/AGO4/AGO1/ERI3/RPS8/RPL5/WDR3/RPS27/ADAR/RTCB/DGCR8/RIOK3/RIOK1/RPP21/RPL10A/BYSL/EIF4A3/USP36/RPL27/RPL26/ELP5/RPS7/WDR43/RPS6/TEX10/RPL35/DHX37/PA2G4/BCDIN3D/WBP11/NOP2/NOP58/WDR75/RRP12/DDX21/RPS24/NSUN6/GTPBP4/AGO2/RPL7/RRS1/CHD7/FRG1/EXOSC9/GAR1/HELQ/MRPL1/RPS9/RPS19/FBL/RPS16/RPS15…	80
GO:0030307	positive regulation of cell growth	37/2886	161/18862	0.00637232	0.0558753	0.0450492	DDX3X/MMP14/PARP2/SMURF1/SEMA7A/TGFB2/HBEGF/HYAL1/SLC25A33/MACF1/MFSD2A/NGF/KLHL22/BCL2/DDX39B/SLC44A4/VEGFA/ERBB2/WNT3/SPHK1/EIF4G1/TRIM32/ANAPC2/KDM2B/LRP1/ZFYVE27/SUPV3L1/EXTL3/CDKN2AIP/EXOSC9/MEGF8/HPN/SYT17/MAP1B/SLC23A2/PAK1/USP47	37
GO:1903050	regulation of proteolysis involved in cellular protein catabolic process	47/2886	215/18862	0.00640248	0.0558753	0.0450492	F8A1/UBQLN2/SMURF1/PSME1/CSNK1A1/RYBP/RPL11/RNF19B/CDC20/PLK3/RPL5/GBA/RNF185/HSPA1A/HSPA1B/HSP90AB1/OSBPL7/RPL23/UBB/RPS7/TRIB2/SOCS5/XPO1/UFL1/CHFR/LRRK2/PSMD14/SUFU/BTRC/WAC/TRIB1/EIF3H/FBXW7/PRKCG/SIRT2/KEAP1/PLK1/PKD1/PLK2/CDC20B/DAB2/USP25/TRIB3/AURKA/CTSC/PSMC3/UBXN1	47
GO:0035872	nucleotide-binding domain, leucine rich repeat containing receptor signaling pathway	13/2886	41/18862	0.00641831	0.0558753	0.0450492	NFKBIA/IRAK2/TAB1/HSPA1A/HSPA1B/UBB/RPS27A/TNFAIP3/UBC/RIPK2/UBA52/CYLD/BIRC3	13
GO:1902100	negative regulation of metaphase/anaphase transition of cell cycle	13/2886	41/18862	0.00641831	0.0558753	0.0450492	CENPF/DUSP1/CDC20/KLHL22/AURKB/BUB1/TTK/CHFR/KNTC1/RAD21/PLK1/CCNB1/ATM	13
GO:0072088	nephron epithelium morphogenesis	19/2886	69/18862	0.00642119	0.0558753	0.0450492	GPC3/AGT/PBX1/SIX4/SMO/WNT2B/BCL2/VEGFA/NOG/HES1/PAX8/AHI1/PTCH1/MYC/PKD1/FOXD1/GZF1/BMP2/LGR4	19
GO:0006779	porphyrin-containing compound biosynthetic process	10/2886	28/18862	0.00642629	0.0558753	0.0450492	IREB2/IBA57/ALAS1/UROD/SRRD/FECH/NFE2L1/RSAD1/SLC25A38/HMBS	10
GO:0021988	olfactory lobe development	10/2886	28/18862	0.00642629	0.0558753	0.0450492	SLIT2/SEMA7A/ROBO2/WNT5A/NR2E1/AGTPBP1/LRRK2/CHD7/ATF5/RPGRIP1L	10
GO:0060485	mesenchyme development	60/2886	287/18862	0.0064537	0.0560348	0.0451778	EFNB1/SEMA4B/RADIL/MSX1/SEMA7A/ACTA1/TGFB2/TGFB3/HIF1A/SIX4/FERMT2/PPP2CA/FBXL17/ROBO2/WNT5A/SEMA3B/EZH2/EXOC4/SMO/SEMA3C/IL6/HEYL/SEMA6C/CDH2/BCL2/FOXC1/CUL7/DDX5/AXIN2/NOG/HES1/CLASP2/SPRED2/SEMA4C/HDAC2/BNC2/ENG/ALX1/HMGA2/ERBB3/GBX2/FRZB/TCF7L2/PDCD4/BMPR1A/FOXH1/MYC/HEY1/FGFR1/LOXL2/PITX2/HPN/TGFB1I1/VASN/FOXD1/DAB2/RGCC/TIAM1/BMP2/PHLDB1	60
GO:0046323	glucose import	20/2886	74/18862	0.00657714	0.0568114	0.045804	GPC3/MEF2A/RNASEL/PRKAG2/SLC2A1/PEA15/SLC25A27/SLC27A4/TSC1/HNF1A/APPL2/CREBL2/ADIPOR2/CAPN10/SORBS1/RTN2/AKT2/INSR/OCLN/SLC2A10	20
GO:0021543	pallium development	36/2886	156/18862	0.00658677	0.0568114	0.045804	PLXNA3/SLIT2/BBS4/BTG2/ATP2B4/SRGAP2/HIF1A/EZH2/SMO/FOXP2/LAMB1/MFSD2A/SLC2A1/BCAN/CDH2/ATAT1/EFHC1/EZH1/CDK5R1/KDM6B/TRA2B/ALK/NR2E1/TSC1/LRP1/SLC38A2/TBR1/EMX2/KIF5B/BBS2/GART/XRN2/BTBD3/PLCB1/DIXDC1/TSKU	36
GO:0031570	DNA integrity checkpoint	36/2886	156/18862	0.00658677	0.0568114	0.045804	FOXO4/BTG2/UIMC1/CDC25C/XPC/CNOT4/HUS1/PLK3/ORC1/GADD45A/MUC1/CDC45/PPP1R10/DDX39B/CDC5L/CDC6/BRIP1/RPL26/TFDP2/CRY1/HMGA2/ATF2/CDK1/WAC/ARID3A/FBXO31/CNOT1/RBL2/PLK1/EME2/CCNB1/PLK2/RGCC/E2F1/AURKA/ATM	36
GO:0015919	peroxisomal membrane transport	8/2886	20/18862	0.00666498	0.0568114	0.045804	ABCD1/ABCD4/PEX1/PEX10/PEX14/PEX19/PEX6/PEX2	8
GO:0048025	negative regulation of mRNA splicing, via spliceosome	8/2886	20/18862	0.00666498	0.0568114	0.045804	HNRNPA2B1/C1QBP/SRSF7/HNRNPK/SFSWAP/PTBP1/RNPS1/DYRK1A	8
GO:0090189	regulation of branching involved in ureteric bud morphogenesis	8/2886	20/18862	0.00666498	0.0568114	0.045804	AGT/SIX4/SMO/WNT2B/VEGFA/NOG/PAX8/LGR4	8
GO:1903978	regulation of microglial cell activation	8/2886	20/18862	0.00666498	0.0568114	0.045804	IL6/TTBK1/NR1D1/SPHK1/LRRK2/LDLR/ATM/CTSC	8
GO:0006783	heme biosynthetic process	9/2886	24/18862	0.00667424	0.0568114	0.045804	IREB2/IBA57/ALAS1/UROD/SRRD/FECH/NFE2L1/SLC25A38/HMBS	9
GO:0036003	positive regulation of transcription from RNA polymerase II promoter in response to stress	9/2886	24/18862	0.00667424	0.0568114	0.045804	MBTPS2/ATF3/HIF1A/MUC1/ATF4/ATF6B/VEGFA/HSPA5/DDIT3	9
GO:0046835	carbohydrate phosphorylation	9/2886	24/18862	0.00667424	0.0568114	0.045804	PFKFB4/FGGY/XYLB/KHK/IPPK/HKDC1/HK1/PFKFB3/GNPTG	9
GO:0048710	regulation of astrocyte differentiation	9/2886	24/18862	0.00667424	0.0568114	0.045804	IL6/TTBK1/NR1D1/NOG/HES1/NR2E1/LDLR/BMP2/CLCF1	9
GO:0060074	synapse maturation	9/2886	24/18862	0.00667424	0.0568114	0.045804	CAMK2B/CDC20/NFIA/BCAN/SEZ6/ANAPC2/SYBU/YWHAZ/SHANK1	9
GO:0008625	extrinsic apoptotic signaling pathway via death domain receptors	22/2886	84/18862	0.00673963	0.0571528	0.0460792	DDX3X/SERPINE1/THBS1/ATF3/RAF1/FAF1/NGF/PEA15/HMOX1/PMAIP1/BCL2/RIPK1/DAXX/SKIL/TNFAIP3/BAG3/ITPRIP/FAS/STK3/TNFRSF10B/HMGB2/DEDD2	22
GO:1903313	positive regulation of mRNA metabolic process	22/2886	84/18862	0.00673963	0.0571528	0.0460792	PRDX6/BTG2/TRA2A/PUM1/ZC3H12A/RBMXL1/TNRC6B/EIF4ENIF1/TRA2B/GIGYF2/NCL/NANOS1/AGO2/PABPC1/HNRNPD/ZFP36/PAF1/CNOT1/CCNB1/YTHDF1/HSPA8/NUP98	22
GO:0097345	mitochondrial outer membrane permeabilization	16/2886	55/18862	0.00675554	0.0572093	0.0461247	BMF/TP53BP2/TP73/CHCHD10/PMAIP1/BCL2/HSPA1A/TMEM102/TFDP2/SLC35F6/BCL2L11/HIP1R/YWHAZ/BNIP3L/BBC3/E2F1	16
GO:0003205	cardiac chamber development	35/2886	151/18862	0.00680284	0.0574524	0.0463208	SLIT2/DLL4/SMAD6/TNNT2/TGFB2/HIF1A/NDST1/MATR3/ROBO2/PLXND1/WNT5A/SMO/SEMA3C/DHRS3/HEYL/RBM15/TAB1/ZBTB14/FOXC1/FZD2/NOG/HES1/FHL2/ENG/FRS2/LRP2/SUFU/BMPR1A/FOXH1/HEY1/CHD7/ANK2/ZFPM1/POU4F1/BMP2	35
GO:0010821	regulation of mitochondrion organization	35/2886	151/18862	0.00680284	0.0574524	0.0463208	HDAC6/FIS1/BMF/TP53BP2/HIF1A/SQSTM1/FNIP1/TP73/ATP13A2/OMA1/CHCHD10/PMAIP1/BCL2/HSPA1A/USP36/MIEF2/TMEM102/TFDP2/PARL/SLC35F6/BCL2L11/HIP1R/CAMKK2/STAT2/LRRK2/ZDHHC6/PPIF/YWHAZ/BNIP3L/FBXW7/BBC3/PLAUR/PDCD5/DHODH/E2F1	35
GO:0030323	respiratory tube development	38/2886	167/18862	0.00682586	0.0574932	0.0463537	GPC3/PHEX/MMP14/CTSH/TGFB3/ADAMTS2/FGF18/SPARC/SLC23A1/LOX/WNT5A/ERRFI1/WNT2B/CELSR1/WNT7B/TAB1/VEGFA/CCDC40/FOXJ1/JMJD6/ITGA3/NOG/HES1/CCDC39/PKDCC/GLI1/TULP3/IGFBP5/BMPR1A/FBXW7/SLC7A11/CRISPLD2/SMPD3/ATXN1L/PKD1/FGF9/ASXL1/PGR	38
GO:0017038	protein import	43/2886	194/18862	0.00687093	0.0577906	0.0465934	SNX33/HSP90AA1/NFKBIA/HSPA4/SMO/PEX1/PEX10/PEX14/ZC3H12A/TXNIP/PEX19/EIF4ENIF1/NUP153/E2F3/PPP1R10/PEX6/HSP90AB1/RPL23/JUP/KPNA2/RPAIN/RANBP2/RAN/APPL2/LRRK2/IPO8/HSPD1/BAG3/SUFU/GPIHBP1/UBR5/PEX2/PDCD5/ELAVL1/TIMM44/MBTPS1/NUP155/UFM1/NXT1/MAVS/PKIG/HSPA8/NUP98	43
GO:0021953	central nervous system neuron differentiation	40/2886	178/18862	0.00701085	0.0588874	0.0474777	PLXNA3/HPRT1/SLIT2/DLL4/BTG2/HSP90AA1/NIN/SPOCK1/ROBO2/WNT5A/SMO/FZD1/INHBA/CHD5/EPHB2/TAL1/CHRNB2/GBA/HSP90AB1/WNT3/UBB/HES1/IFT172/NR2E1/PTCH1/AGTPBP1/TCTN1/SCYL2/TULP3/GBX2/TBR1/NR4A2/NANOS1/SUFU/ATF5/SPTBN4/ZSWIM6/POU4F1/TSKU/SCYL1	40
GO:1902110	positive regulation of mitochondrial membrane permeability involved in apoptotic process	17/2886	60/18862	0.00711095	0.0592692	0.0477855	BMF/TP53BP2/TP73/CHCHD10/PMAIP1/BCL2/HSPA1A/TMEM102/TFDP2/SLC35F6/BCL2L11/HIP1R/ATF2/YWHAZ/BNIP3L/BBC3/E2F1	17
GO:0031111	negative regulation of microtubule polymerization or depolymerization	12/2886	37/18862	0.00711798	0.0592692	0.0477855	HDAC6/MID1IP1/CAMSAP2/INPP5J/CLASP2/NAV3/FKBP4/APC2/MAP1B/DYRK1A/TPX2/SPEF1	12
GO:0048846	axon extension involved in axon guidance	12/2886	37/18862	0.00711798	0.0592692	0.0477855	PLXNA3/SEMA4B/SLIT2/SEMA7A/WNT5A/SEMA3B/SEMA3C/SEMA6C/VEGFA/WNT3/SEMA4C/MEGF8	12
GO:1902284	neuron projection extension involved in neuron projection guidance	12/2886	37/18862	0.00711798	0.0592692	0.0477855	PLXNA3/SEMA4B/SLIT2/SEMA7A/WNT5A/SEMA3B/SEMA3C/SEMA6C/VEGFA/WNT3/SEMA4C/MEGF8	12
GO:0035329	hippo signaling	14/2886	46/18862	0.00712342	0.0592692	0.0477855	TJP1/MARK3/WWC1/VGLL4/LIMD1/TEAD3/NEK8/MAP2K3/AMOTL2/MOB1A/STK3/MOB1B/LATS2/SHANK2	14
GO:0043244	regulation of protein-containing complex disassembly	29/2886	120/18862	0.00715724	0.0594705	0.0479479	HDAC6/MID1IP1/CAMSAP2/CFL2/ADRB2/ETF1/FYCO1/CAPZA2/GBA/NES/FLII/EIF5A/CLASP2/SPTBN1/TRPV4/NAV3/AVIL/LIMA1/VIL1/ADD3/DMTN/SPTBN4/INSR/APC2/MAP1B/SCAF4/TPX2/SPEF1/UVRAG	29
GO:0018205	peptidyl-lysine modification	78/2886	391/18862	0.00742197	0.0615874	0.0496546	HDAC6/KDM6A/EID1/WDR61/TAF5L/MBIP/BAZ1A/EGR1/JADE2/LOX/BRPF1/SETD5/GNL3/SETD2/PAXIP1/KMT2C/EZH2/NUP205/KMT2E/CHD5/RLF/MTF2/RWDD3/PYGO2/MUC1/RANGAP1/SIRT5/NUP153/ATAT1/BRPF3/ZNF451/MLLT6/EZH1/KANSL1/JMJD6/KAT7/TADA2A/SUPT6H/USP22/PER1/DPY30/TET3/RANBP2/HDAC2/TOPORS/PHF19/GTF3C4/DIP2B/KANSL2/ING4/ATF2/HAT1/IWS1/TAF5/EGR2/SIRT1/EPC1/SUV39H2/KAT6A/ASH2L/LOXL2/JADE1/ZNF274/TRPM4/SIRT2/UBA2/DNMT1/METTL…	78
GO:0042471	ear morphogenesis	27/2886	110/18862	0.00744604	0.0617043	0.0497488	MSX1/SIX4/LRIG1/WNT5A/INSIG1/HOXA2/EPHB2/TTC39C/TSHZ1/SLC44A4/TCAP/FZD2/RPL38/NOG/PAX8/ROR2/TPRN/CEP290/LRIG3/GBX2/FRZB/PDZD7/FZD6/CHD7/HPN/SOD1/USH1C	27
GO:0051028	mRNA transport	35/2886	152/18862	0.00756817	0.0626213	0.0504882	CPSF4/DHX9/SETD2/NUP205/HNRNPA2B1/SRRM1/SRSF11/NUP153/DDX39B/SRSF3/ALYREF/EIF4A3/SRSF1/SUPT6H/EIF5A/CPSF3/SRSF7/XPO1/RANBP2/QKI/IWS1/WDR33/ARC/G3BP2/YTHDC1/ZFP36/DDX39A/SMG1/RNPS1/NUP155/U2AF1/NXT1/NUP98/NUP160/NXF1	35
GO:0008630	intrinsic apoptotic signaling pathway in response to DNA damage	25/2886	100/18862	0.00766912	0.0632984	0.051034	AEN/TP73/CASP9/EPHA2/MUC1/IFI16/HMOX1/BCL2/RPL26/SKIL/BCL2L11/HNRNPK/TOPORS/TRIM32/SIRT1/DDIT4/ING2/BCL3/TMEM161A/CDKN2D/TPT1/E2F1/ATM/RPS3/USP47	25
GO:0046473	phosphatidic acid metabolic process	15/2886	51/18862	0.00769425	0.0634212	0.051133	DGKQ/LPCAT4/ABHD5/PLD1/LIPH/DGKG/AGPAT2/NR1H4/GPD1/DGKD/GPAM/AGPAT5/PLA2G12A/DGKH/AGPAT3	15
GO:0090090	negative regulation of canonical Wnt signaling pathway	40/2886	179/18862	0.00772627	0.0636003	0.0512775	GPC3/CHD8/CCDC88C/DACT1/PSME1/CSNK1A1/EGR1/PSMD6/WNT5A/LIMD1/HECW1/KREMEN1/CDH2/PSMD3/PSMC5/AXIN2/NOG/SOX2/PSMD2/ROR2/INVS/SCYL2/DDIT3/GLI1/CUL3/FRZB/PSMD14/TCF7L2/DKK1/FZD6/STK3/JADE1/APC2/CYLD/DAB2/LATS2/BMP2/PSMA7/FZD4/PSMC3	40
GO:0060840	artery development	24/2886	95/18862	0.00774656	0.0636825	0.0513438	DLL4/SMAD6/TGFB2/NDST1/LOX/ROBO2/MYLK/PLXND1/ADAMTS9/TAB1/FOXC1/VEGFA/NGFR/NOG/HES1/ENG/LRP1/LRP2/SUFU/BMPR1A/FOXH1/HEY1/CHD7/SLC2A10	24
GO:0060349	bone morphogenesis	23/2886	90/18862	0.00779506	0.063857	0.0514844	MMP14/FGFR3/MSX1/TGFB3/FGF18/INSIG1/DHRS3/ALPL/THBS3/MEF2D/FOXC1/AXIN2/IFT80/COL27A1/TRPV4/TMEM119/RARG/MEGF8/SMPD3/GNAS/TSKU/SERPINH1/INPPL1	23
GO:0006869	lipid transport	90/2886	461/18862	0.00779961	0.063857	0.0514844	ABCD1/ACSL4/MID1IP1/FIS1/THBS1/SLC27A2/AQP9/AGT/KDM5B/PPFIA4/ADORA1/ATG2B/BDKRB2/SERPINA5/ABCD4/SGPP1/NFKBIA/OSBPL11/PPARG/PRKAG2/CROT/ABCB4/OSBPL3/EEPD1/INHBA/MFSD2A/SLC2A1/CPT2/ABCA4/CPT1B/NPC1/ATP8B1/TNFRSF11A/OSBPL7/STARD3/ABCC3/PCTP/PROCA1/SPNS3/SLCO2A1/GJA1/PTCH1/ANXA1/SLC1A1/SLC27A4/CEL/ABCA2/SCARB1/P2RX4/ACACB/CRY1/NR1H4/LRP1/GLS2/LIMA1/SLC38A2/APOLD1/LPCAT3/HDLBP/PER2/PLA2R1/PDZD8/ACSL5/…	90
GO:0032728	positive regulation of interferon-beta production	11/2886	33/18862	0.00782246	0.063857	0.0514844	DDX3X/DHX9/HSP90AA1/IRF1/POLR3C/RIOK3/RIPK2/TLR3/HMGB2/POLR3F/MAVS	11
GO:0035909	aorta morphogenesis	11/2886	33/18862	0.00782246	0.063857	0.0514844	DLL4/TGFB2/MYLK/ADAMTS9/HES1/ENG/LRP1/BMPR1A/FOXH1/HEY1/CHD7	11
GO:0042168	heme metabolic process	11/2886	33/18862	0.00782246	0.063857	0.0514844	IREB2/IBA57/ALAS1/UROD/HMOX1/SRRD/FECH/NFE2L1/SLC25A38/AMBP/HMBS	11
GO:0030324	lung development	37/2886	163/18862	0.00782976	0.063857	0.0514844	GPC3/PHEX/MMP14/CTSH/TGFB3/ADAMTS2/FGF18/SPARC/SLC23A1/LOX/WNT5A/ERRFI1/WNT2B/CELSR1/WNT7B/TAB1/VEGFA/CCDC40/FOXJ1/JMJD6/ITGA3/NOG/HES1/CCDC39/PKDCC/GLI1/IGFBP5/BMPR1A/FBXW7/SLC7A11/CRISPLD2/SMPD3/ATXN1L/PKD1/FGF9/ASXL1/PGR	37
GO:0045089	positive regulation of innate immune response	48/2886	223/18862	0.00797539	0.0649589	0.0523729	MUC12/MUC17/ADAM8/DHX9/HSP90AA1/PSME1/FBXW11/MATR3/PARP9/RAF1/PSMD6/WNT5A/BCL10/CD160/POLR3C/MUC1/IFI16/XRCC6/TAB1/RIOK3/PSMD3/PSMC5/PAK2/IL12A/PSMD2/IL18RAP/FYN/XRCC5/PSMD14/BTRC/IKBKB/HMGB2/NFKB1/EREG/RELB/PVR/RPS19/AP1G1/PSPC1/POLR3F/MAVS/SRC/PSMA7/PAK1/TRIM6/TRIM5/PSMC3/MUC6	48
GO:0051494	negative regulation of cytoskeleton organization	36/2886	158/18862	0.00811435	0.0659777	0.0531942	HDAC6/MID1IP1/SLIT2/TJP1/CAMSAP2/NPM1/CAPZA2/INPP5J/ARHGAP28/FLII/PAK2/CLASP2/SPTBN1/TMSB10/KANK1/HIP1R/NAV3/AVIL/LIMA1/FKBP4/VIL1/ADD3/TMEM67/DMTN/DLC1/SHANK1/SPTBN4/ARHGEF18/APC2/MAP1B/DYRK1A/TPX2/SPEF1/ARAP1/SSH3/PPFIA1	36
GO:0031050	dsRNA processing	16/2886	56/18862	0.00814315	0.0659777	0.0531942	SRRT/IL6/HNRNPA2B1/PUM1/AGO4/AGO1/ZC3H12A/ADAR/ZC3H7B/DGCR8/RIPK1/DDX5/PUM2/ZC3H10/BCDIN3D/AGO2	16
GO:0070918	production of small RNA involved in gene silencing by RNA	16/2886	56/18862	0.00814315	0.0659777	0.0531942	SRRT/IL6/HNRNPA2B1/PUM1/AGO4/AGO1/ZC3H12A/ADAR/ZC3H7B/DGCR8/RIPK1/DDX5/PUM2/ZC3H10/BCDIN3D/AGO2	16
GO:1902275	regulation of chromatin organization	41/2886	185/18862	0.00817102	0.0661168	0.0533064	ALKBH4/EID1/WDR61/SETD5/PAXIP1/KMT2E/MTHFR/TAL1/MIER1/MTF2/PYGO2/MUC1/CDC45/HMGA1/VEGFA/ZNF451/MLLT6/KAT7/TADA2A/SUPT6H/BCL6/PHF19/SART3/PPHLN1/LRRK2/TRIP12/IWS1/MKI67/SIRT1/PARP10/UBR5/ING2/ZNF274/PAF1/DNMT1/CCNB1/MPHOSPH8/ATM/CTR9/SPTY2D1/SSRP1	41
GO:0003222	ventricular trabecula myocardium morphogenesis	6/2886	13/18862	0.00829333	0.0664973	0.0536131	DLL4/TGFB2/ENG/BMPR1A/FOXH1/CHD7	6
GO:0010755	regulation of plasminogen activation	6/2886	13/18862	0.00829333	0.0664973	0.0536131	SERPINE1/THBS1/F12/SERPINF2/HPN/RUNX1	6
GO:0014745	negative regulation of muscle adaptation	6/2886	13/18862	0.00829333	0.0664973	0.0536131	ATP2B4/ERRFI1/LMNA/KLF4/IGFBP5/FOXO1	6
GO:0035331	negative regulation of hippo signaling	6/2886	13/18862	0.00829333	0.0664973	0.0536131	MARK3/WWC1/VGLL4/LIMD1/MAP2K3/SHANK2	6
GO:0042921	glucocorticoid receptor signaling pathway	6/2886	13/18862	0.00829333	0.0664973	0.0536131	NR3C1/ARID1A/PER1/CRY1/CALR/ARNTL	6
GO:0046831	regulation of RNA export from nucleus	6/2886	13/18862	0.00829333	0.0664973	0.0536131	DHX9/NRDE2/SETD2/NUP153/SUPT6H/IWS1	6
GO:0051988	regulation of attachment of spindle microtubules to kinetochore	6/2886	13/18862	0.00829333	0.0664973	0.0536131	NEK2/SPAG5/AURKB/RACGAP1/SIRT2/CCNB1	6
GO:0007091	metaphase/anaphase transition of mitotic cell cycle	17/2886	61/18862	0.00848395	0.067265	0.0542321	CENPF/DUSP1/CDC23/CDC20/KLHL22/CDC6/CDC27/AURKB/BUB1/TTK/KNTC1/CUL3/RAD21/CENPE/PLK1/CCNB1/ATM	17
GO:0070059	intrinsic apoptotic signaling pathway in response to endoplasmic reticulum stress	17/2886	61/18862	0.00848395	0.067265	0.0542321	CHAC1/ITPR1/ATF4/PTPN2/PMAIP1/BCL2/HSPA1A/EIF2AK3/BCL2L11/DDIT3/TMBIM6/LRRK2/SIRT1/TNFRSF10B/BBC3/TRIB3/SERINC3	17
GO:0002063	chondrocyte development	10/2886	29/18862	0.00848701	0.067265	0.0542321	FGF18/MEX3C/AXIN2/EIF2AK3/COL27A1/CHST11/RARG/SMPD3/TSKU/SERPINH1	10
GO:0031114	regulation of microtubule depolymerization	10/2886	29/18862	0.00848701	0.067265	0.0542321	HDAC6/MID1IP1/CAMSAP2/CLASP2/TRPV4/NAV3/APC2/MAP1B/TPX2/SPEF1	10
GO:0060914	heart formation	10/2886	29/18862	0.00848701	0.067265	0.0542321	ROBO2/WNT5A/PIM1/AXIN2/HES1/LRP2/DKK1/BMPR1A/FOXH1/BMP2	10
GO:0061311	cell surface receptor signaling pathway involved in heart development	10/2886	29/18862	0.00848701	0.067265	0.0542321	MSX1/DLL4/WNT5A/GALNT11/HEYL/NOG/DKK1/BMPR1A/HEY1/BMP2	10
GO:0072337	modified amino acid transport	10/2886	29/18862	0.00848701	0.067265	0.0542321	PDZK1/SLC46A1/CTNS/SLC3A1/GJA1/SLC38A2/LRP2/SLC7A11/ABCC1/SLC19A1	10
GO:0030879	mammary gland development	31/2886	132/18862	0.0085824	0.067847	0.0547014	COX2/UPRT/MSX1/ELF3/KDM5B/TGFB3/HIF1A/WNT5A/MST1/SMO/EPHA2/CSF1/PYGO2/MTX1/WNT7B/TNFRSF11A/VEGFA/FASN/HOXB9/WNT3/BCL2L11/PTCH1/SOCS2/IGFBP5/BTRC/AKT2/DHODH/ITGA2/PRLR/SRC/PGR	31
GO:0072009	nephron epithelium development	26/2886	106/18862	0.00860206	0.0679156	0.0547567	GPC3/AGT/PBX1/SIX4/LAMB2/SMO/HEYL/WNT2B/WNT7B/BCL2/FOXC1/VEGFA/FOXJ1/NOG/HES1/PAX8/CD24/AHI1/PTCH1/MYC/PKD1/FOXD1/GZF1/ASXL1/BMP2/LGR4	26
GO:1990138	neuron projection extension	37/2886	164/18862	0.00865663	0.0681723	0.0549637	PLXNA3/USP9X/SEMA4B/SMURF1/SLIT2/SEMA7A/HSP90AA1/PLXNA1/WNT5A/SEMA3B/LAMB2/SEMA3C/MACF1/SEMA6C/RTN4R/KIAA0319/VEGFA/HSP90AB1/WNT3/CDK5R1/SEMA4C/ANAPC2/ULK1/LRP1/DIP2B/ITGA4/ZFYVE27/VCL/DPYSL2/MEGF8/SYT17/MAP1B/TIAM1/SLC23A2/AURKA/PAK1/FLRT1	37
GO:0051306	mitotic sister chromatid separation	18/2886	66/18862	0.00873041	0.0686198	0.0553244	CENPF/DUSP1/CDC23/CDC20/KLHL22/CDC6/CDC27/AURKB/BUB1/TTK/KNTC1/DIS3L2/CUL3/RAD21/CENPE/PLK1/CCNB1/ATM	18
GO:0071375	cellular response to peptide hormone stimulus	66/2886	325/18862	0.00874472	0.0686198	0.0553244	FOXO4/PRKAR1B/BAIAP2L1/SH2B2/CPEB2/PKM/MAX/ATP6V1A/PPARG/INSIG1/ATP6V0A4/PRKAR2B/ERRFI1/SLC25A33/AGTRAP/WDTC1/BCAR3/RANGAP1/PTPN2/CDC5L/BAIAP2/PIP4K2B/CDC6/HDAC5/PDK2/STXBP4/BRIP1/FYN/PHIP/KANK1/NR4A3/SLC27A4/TSC1/APPL2/NR1H4/SOCS2/STAT6/NR4A1/ADCY6/C2CD5/CAPN10/GRB14/NR4A2/SORBS1/SIRT1/EIF4EBP2/ECHDC3/GPT/CA2/ATP6V1H/NFKB1/AKT2/GDF15/INSR/SOCS1/ADCY9/MAP1B/GHR/PRLR/FOXO1/SNX5/TRIB3/SRC/LPIN3/SIK…	66
GO:0018210	peptidyl-threonine modification	30/2886	127/18862	0.00883186	0.0691958	0.0557888	DGKQ/CEMIP/DYRK3/CDC42BPA/VRK1/WNT5A/GALNT11/PRKAG2/BCL2/TTBK1/SPHK1/CDK5R1/EIF4G1/SPRED2/TTK/ULK1/GALNT4/MAP3K12/LRRK2/CLK1/CDK1/DDIT4/PARD3/RIPK2/DMTN/SIRT2/CDK10/PLK1/DYRK1A/TRIM6	30
GO:0010634	positive regulation of epithelial cell migration	39/2886	175/18862	0.00884256	0.0691958	0.0557888	SRPX2/HDAC6/THBS1/CTSH/AGT/TGFB2/HIF1A/FGF18/SPARC/HBEGF/IQSEC1/WNT5A/HYAL1/PIK3CD/ZC3H12A/HMOX1/VEGFA/ITGA3/MAP2K3/CLASP2/RHOB/PRKCE/ATOH8/ANXA1/SCARB1/P2RX4/VIL1/DOCK1/SIRT1/FGFR1/DOCK5/VEGFC/ZNF580/EMC10/CALR/PLK2/ITGA2/SRC/ETS1	39
GO:0061333	renal tubule morphogenesis	19/2886	71/18862	0.00889543	0.0693462	0.0559101	GPC3/AGT/PBX1/SIX4/SMO/WNT2B/BCL2/VEGFA/NOG/HES1/PAX8/AHI1/PTCH1/MYC/PKD1/FOXD1/GZF1/BMP2/LGR4	19
GO:0072028	nephron morphogenesis	19/2886	71/18862	0.00889543	0.0693462	0.0559101	GPC3/AGT/PBX1/SIX4/SMO/WNT2B/BCL2/VEGFA/NOG/HES1/PAX8/AHI1/PTCH1/MYC/PKD1/FOXD1/GZF1/BMP2/LGR4	19
GO:0098586	cellular response to virus	19/2886	71/18862	0.00889543	0.0693462	0.0559101	DDX3X/HSP90AA1/HIF1A/IL6/PUM1/ZC3H12A/ADAR/MAPK11/RIOK3/LGALS9/C1QBP/IL12A/PUM2/USP15/GBF1/ANKRD17/POU2F2/BIRC3/TRIM6	19
GO:0034614	cellular response to reactive oxygen species	36/2886	159/18862	0.00898211	0.0695655	0.0560869	HDAC6/GCH1/EZH2/IL6/JUN/RIPK1/SPHK1/PDK2/RNF112/KDM6B/RHOB/IL18RAP/HDAC2/TNFAIP3/ANXA1/NR4A3/KLF4/TXN/CAMKK2/PAWR/LRRK2/ANKZF1/SIRT1/PPIF/HNRNPD/ZNF580/AXL/SMPD3/FOXO1/SOD1/SRC/OSER1/ETS1/APOA4/RPS3/CCS	36
GO:0030204	chondroitin sulfate metabolic process	12/2886	38/18862	0.00898335	0.0695655	0.0560869	IDUA/HYAL1/CHPF2/BCAN/XYLT2/DSE/CHST11/CHPF/SPOCK2/SPOCK3/VCAN/ARSB	12
GO:0031577	spindle checkpoint	12/2886	38/18862	0.00898335	0.0695655	0.0560869	CENPF/DUSP1/CDC20/KLHL22/AURKB/BUB1/TTK/CHFR/KNTC1/PLK1/CCNB1/ATM	12
GO:0021954	central nervous system neuron development	21/2886	81/18862	0.0090268	0.0695655	0.0560869	PLXNA3/HPRT1/SLIT2/BTG2/HSP90AA1/NIN/ROBO2/WNT5A/EPHB2/CHRNB2/HSP90AB1/UBB/NR2E1/TCTN1/SCYL2/GBX2/NR4A2/NANOS1/ATF5/SPTBN4/TSKU	21
GO:2000116	regulation of cysteine-type endopeptidase activity	49/2886	230/18862	0.00902717	0.0695655	0.0560869	DDX3X/FIS1/THBS1/CTSH/PRR7/FNIP1/RAF1/PPARG/CASP9/DHCR24/BCL10/NGF/IFI16/TBC1D10A/PMAIP1/RIPK1/TTBK1/VEGFA/NGFR/LGALS9/PAK2/SOX2/EIF2AK3/BCL2L11/FYN/SLC1A1/ACER2/ANP32B/KLF4/TNFSF15/HIP1R/VIL1/HSPD1/FAS/SIRT1/MYC/RIPK2/TNFRSF10B/DLC1/CARD8/BBC3/PLAUR/PDCD5/CDKN2D/GAS6/SRC/BIRC3/RPS3/USP47	49
GO:0008380	RNA splicing	93/2886	481/18862	0.00903019	0.0695655	0.0560869	SRPK3/RBM41/HNRNPC/BUD31/CPSF4/SRRT/AQR/PRDX6/DHX9/CLK4/PPP2CA/TSEN2/SRPK2/TRA2A/HNRNPA2B1/SPEN/SRRM1/ZBTB8OS/YBX1/SRSF11/RBMXL1/PTBP2/PRPF38B/RBM15/DDX20/RTCB/SF3A1/SNRNP48/DDX39B/HSPA1A/SRSF3/CDC5L/ALYREF/EIF4A3/RBFOX3/CWC25/DHX8/DDX5/JMJD6/SRSF1/SUPT6H/C1QBP/PRPF8/FXR1/TRA2B/CPSF3/SRSF7/QKI/WTAP/HABP4/HNRNPK/PRPF4/SFSWAP/RBM19/SART3/ZC3H10/TMBIM6/SLC38A2/WBP11/NCL/CLK1/CWC22/IWS1/WDR33/HNRNPH3…	93
GO:0002068	glandular epithelial cell development	9/2886	25/18862	0.00903609	0.0695655	0.0560869	WNT5A/RHEB/SMO/CDH2/FASN/RARG/HNF4A/ARNTL/PAX6	9
GO:0007026	negative regulation of microtubule depolymerization	9/2886	25/18862	0.00903609	0.0695655	0.0560869	HDAC6/MID1IP1/CAMSAP2/CLASP2/NAV3/APC2/MAP1B/TPX2/SPEF1	9
GO:0006479	protein methylation	38/2886	170/18862	0.00919363	0.0704359	0.0567886	KDM6A/WDR61/BTG2/ETF1/SETD5/SETD2/PAXIP1/KMT2C/EZH2/KMT2E/CHD5/MTHFR/RLF/MTF2/PYGO2/MLLT6/EZH1/SUPT6H/DPY30/FAM98A/TET3/PHF19/NR1H4/IWS1/SIRT1/SUV39H2/PCMTD1/ASH2L/ZNF274/FBL/PAF1/DNMT1/METTL22/PRMT2/SNRPB/PCMTD2/CTR9/PRMT3	38
GO:0008213	protein alkylation	38/2886	170/18862	0.00919363	0.0704359	0.0567886	KDM6A/WDR61/BTG2/ETF1/SETD5/SETD2/PAXIP1/KMT2C/EZH2/KMT2E/CHD5/MTHFR/RLF/MTF2/PYGO2/MLLT6/EZH1/SUPT6H/DPY30/FAM98A/TET3/PHF19/NR1H4/IWS1/SIRT1/SUV39H2/PCMTD1/ASH2L/ZNF274/FBL/PAF1/DNMT1/METTL22/PRMT2/SNRPB/PCMTD2/CTR9/PRMT3	38
GO:0010715	regulation of extracellular matrix disassembly	7/2886	17/18862	0.00920611	0.0704359	0.0567886	FGFR4/IL6/DDR2/CLASP2/LRP1/DPP4/ETS1	7
GO:0044539	long-chain fatty acid import into cell	7/2886	17/18862	0.00920611	0.0704359	0.0567886	THBS1/SLC27A2/SLC2A1/SLC27A4/ACSL5/ACSL1/AKT2	7
GO:0001889	liver development	32/2886	138/18862	0.00929222	0.0710068	0.0572489	PKM/HLX/EZH2/ASNS/IL6/HMGCL/AK4/HMOX1/RHBDD3/ONECUT2/DDX39B/CCDC40/HES1/CCDC39/TNFAIP3/PTCH1/ANXA1/HNF1A/GLI1/KRT18/CUL3/FRZB/FBXW7/HNRNPD/HPN/RPGRIP1L/PKD1/ITGA2/HMGCS1/HNF4A/AURKA/TAF10	32
GO:0030509	BMP signaling pathway	35/2886	154/18862	0.00931443	0.0710223	0.0572615	GPC3/USP9X/SMURF1/MSX1/CTDSPL2/SMAD6/TGFB2/TGFB3/EGR1/SMAD5/RGMB/PPARG/WNT5A/NBL1/HIVEP1/DDX5/ITGA3/NOG/FAM83G/HES1/SKIL/ROR2/ENG/LEMD3/USP15/LRP2/PDCD4/BMPR1A/MEGF8/GDF15/SMPD3/ZFYVE16/FOXD1/PELO/BMP2	35
GO:0032608	interferon-beta production	15/2886	52/18862	0.00931723	0.0710223	0.0572615	DDX3X/TRIM56/DHX9/TRAF3/HSP90AA1/IRF1/POLR3C/RIOK3/REL/RIPK2/TLR3/HMGB2/RELB/POLR3F/MAVS	15
GO:2000479	regulation of cAMP-dependent protein kinase activity	8/2886	21/18862	0.0093443	0.071141	0.0573571	PRKAR1B/ATP2B4/ADRB2/MST1/PRKAG2/PRKAR2B/SIRT1/PKIG	8
GO:0045732	positive regulation of protein catabolic process	48/2886	225/18862	0.00943623	0.0717525	0.0578501	GPC3/UBQLN2/SMURF1/ADAM8/SNX33/HSP90AA1/DACT1/CSNK1A1/VGLL4/WNT5A/HECW1/RNF19B/CDC20/PLK3/FAF1/GBA/RNF185/RHBDD3/HSPA1A/HSPA1B/OSBPL7/RILP/TIPARP/TRIB2/SOCS5/GJA1/TNFAIP3/TRIM32/ABCA2/CHFR/LRP1/LRRK2/LRP2/TRIB1/FBXW7/SIRT2/LDLR/KEAP1/APC2/PLK1/PLK2/CDC20B/DAB2/FOXO1/TRIB3/AURKA/CTSC/PSMC3	48
GO:0045088	regulation of innate immune response	64/2886	315/18862	0.00960298	0.0728413	0.0587279	MUC12/MUC17/ADAM8/RNASEL/DHX9/DUSP10/HSP90AA1/PSME1/FBXW11/MATR3/IRF1/PARP9/PARP14/RAF1/PPARG/PSMD6/WNT5A/BCL10/CD160/POLR3C/ADAR/MUC1/IFI16/XRCC6/TAB1/PTPN2/RIOK3/HSP90AB1/PSMD3/PSMC5/LGALS9/PAK2/IL12A/PSMD2/IL18RAP/FYN/TNFAIP3/APPL2/XRCC5/PSMD14/BTRC/IKBKB/HMGB2/ABCE1/NFKB1/EREG/RELB/PVR/RPS19/CDC37/AP1G1/SOCS1/PSPC1/POLR3F/MAVS/SRC/PSMA7/BIRC3/PAK1/TRIM6/TRIM5/NR1H3/PSMC3/MUC6	64
GO:0032387	negative regulation of intracellular transport	16/2886	57/18862	0.00974919	0.0736809	0.0594049	YOD1/INSIG1/RANGAP1/NUP153/SNX3/TXN/ABCA2/OS9/LRRK2/BAG3/SUFU/DMTN/MAP1B/UFM1/PKIG/ARHGAP1	16
GO:0055008	cardiac muscle tissue morphogenesis	16/2886	57/18862	0.00974919	0.0736809	0.0594049	DLL4/TNNT2/TGFB2/WNT5A/FOXC1/TCAP/NOG/ENG/LRP2/ANKRD1/BMPR1A/FOXH1/CHD7/ZFPM1/POU4F1/BMP2	16
GO:0006367	transcription initiation from RNA polymerase II promoter	41/2886	187/18862	0.00983206	0.0742147	0.0598352	ESRRG/ESR2/NR3C1/NR2C2/PPARG/PAXIP1/TAF4B/E2F3/GTF2H4/TEAD3/MED20/ZNF451/NR1D1/PSMC5/MED13/PPM1D/NR1D2/NR2E1/NR4A3/NR6A1/MED27/HNF1A/NR1H4/RARG/NR4A1/VDR/NR4A2/TAF5/CDK1/TAF3/HNF4G/NR2F6/MED26/CDK7/CCNB1/HNF4A/PGR/TAF10/GTF2H1/NR1H3/PSMC3	41
GO:0030517	negative regulation of axon extension	13/2886	43/18862	0.00991809	0.0742775	0.0598859	PLXNA3/SEMA4B/SEMA7A/WNT5A/SEMA3B/SEMA3C/SEMA6C/RTN4R/KIAA0319/WNT3/CDK5R1/SEMA4C/DIP2B	13
GO:0050654	chondroitin sulfate proteoglycan metabolic process	13/2886	43/18862	0.00991809	0.0742775	0.0598859	IDUA/HYAL1/CHPF2/BCAN/XYLT2/PXYLP1/DSE/CHST11/CHPF/SPOCK2/SPOCK3/VCAN/ARSB	13
GO:1900744	regulation of p38MAPK cascade	13/2886	43/18862	0.00991809	0.0742775	0.0598859	DUSP10/DUSP1/ZC3H12A/GADD45A/PHLPP1/VEGFA/SPHK1/PER1/MINK1/EMC10/GADD45B/CYLD/BMP2	13
GO:2000273	positive regulation of signaling receptor activity	13/2886	43/18862	0.00991809	0.0742775	0.0598859	HDAC6/ADORA1/HIF1A/ADRB2/HBEGF/NCAPG2/EPHB2/TAL1/HDAC2/ARC/FBXW7/AREG/EREG	13
GO:0045639	positive regulation of myeloid cell differentiation	25/2886	102/18862	0.00994279	0.0742775	0.0598859	HIF1A/INHBA/ISG15/TAL1/JUN/CSF1/ANKRD54/RIPK1/HSPA1A/HSPA1B/SMAP1/KAT7/FOXO3/ROR2/INPP5D/ZNF16/TRIB1/KLF10/CA2/HMGB2/POU4F1/RUNX1/FAM210B/GNAS/ETS1	25
GO:0002756	MyD88-independent toll-like receptor signaling pathway	11/2886	34/18862	0.00999629	0.0742775	0.0598859	TRAF3/RIPK1/UBB/PRKCE/RPS27A/UBC/TANK/IKBKB/TLR3/UBA52/BIRC3	11
GO:0010092	specification of animal organ identity	11/2886	34/18862	0.00999629	0.0742775	0.0598859	ROBO2/WNT5A/WNT2B/AXIN2/PAX8/FRS2/LRP2/TBR1/DKK1/FOXH1/BMP2	11
GO:0043516	regulation of DNA damage response, signal transduction by p53 class mediator	11/2886	34/18862	0.00999629	0.0742775	0.0598859	MSX1/DYRK3/PMAIP1/DDX5/RPL26/SPRED2/PLA2R1/ANKRD1/SIRT1/DYRK1A/ATM	11
GO:0140354	lipid import into cell	11/2886	34/18862	0.00999629	0.0742775	0.0598859	THBS1/SLC27A2/SLC2A1/SLC1A1/SLC27A4/PER2/ACSL5/ACSL1/SLC7A11/SLC1A5/AKT2	11
GO:0106106	cold-induced thermogenesis	33/2886	144/18862	0.00999658	0.0742775	0.0598859	ACHE/ESRRG/DYNC1H1/ADRB2/RHEB/CPT2/ACOT11/OMA1/LEPR/ATF4/VEGFA/NR1D1/PCTP/KDM6B/GJA1/LCN2/PGAM5/APPL2/DDIT3/STAT6/ADIPOR2/PER2/ADRB1/SCD/FABP5/ACSL1/NOVA2/ARRDC3/PRLR/GNAS/ARNTL/LGR4/NR1H3	33
GO:0120161	regulation of cold-induced thermogenesis	33/2886	144/18862	0.00999658	0.0742775	0.0598859	ACHE/ESRRG/DYNC1H1/ADRB2/RHEB/CPT2/ACOT11/OMA1/LEPR/ATF4/VEGFA/NR1D1/PCTP/KDM6B/GJA1/LCN2/PGAM5/APPL2/DDIT3/STAT6/ADIPOR2/PER2/ADRB1/SCD/FABP5/ACSL1/NOVA2/ARRDC3/PRLR/GNAS/ARNTL/LGR4/NR1H3	33
GO:0046545	development of primary female sexual characteristics	24/2886	97/18862	0.0101133	0.0749643	0.0604397	ZFX/MMP14/VGF/SLIT2/ROBO2/INHBA/BCL2/FOXC1/VEGFA/UBB/TIPARP/PTX3/EIF2B5/HSPA5/PTPRN/IDH1/SIRT1/EREG/DACH1/SOD1/SRC/ATM/PGR/FZD4	24
GO:0010812	negative regulation of cell-substrate adhesion	18/2886	67/18862	0.0102703	0.0758553	0.061158	MMP14/SERPINE1/THBS1/SPRY4/SPOCK1/EFNA5/RHOA/LGALS1/BCL6/CLASP2/KANK1/ACER2/LRP1/DMTN/DLC1/ANGPT2/SRC/FZD4	18
GO:0060415	muscle tissue morphogenesis	18/2886	67/18862	0.0102703	0.0758553	0.061158	DLL4/TNNT2/TGFB2/MYLK/WNT5A/FOXC1/TCAP/FZD2/NOG/ENG/LRP2/ANKRD1/BMPR1A/FOXH1/CHD7/ZFPM1/POU4F1/BMP2	18
GO:0046834	lipid phosphorylation	19/2886	72/18862	0.0103922	0.0764266	0.0616186	DGKQ/PIK3C2B/IP6K2/PIK3CD/PIP5K1A/IP6K3/PIP4K2B/SPHK1/DGKG/SOCS5/TMEM150A/PIP5K1B/SOCS2/DGKD/IPMK/PIP5K1C/SMG1/SOCS1/DGKH	19
GO:2001021	negative regulation of response to DNA damage stimulus	21/2886	82/18862	0.0104272	0.0764266	0.0616186	KLHL15/DYRK3/MUC1/SMCHD1/BCL2/PPP1R10/DDX39B/RECQL5/TRIM32/HMGA2/TRIP12/SIRT1/UBR5/ING2/TMEM161A/CDKN2D/NUDT16L1/TPT1/DYRK1A/RPS3/USP47	21
GO:0033238	regulation of cellular amine metabolic process	20/2886	77/18862	0.0104405	0.0764266	0.0616186	HPRT1/SLC7A7/ATP2B4/PSME1/PSMD6/CHRNB2/PSMD3/PSMC5/PSMD2/ODC1/NR1H4/PNKD/PSMD14/NR4A2/AZIN1/SLC7A11/ITGB2/PSMA7/PSMC3/DRD4	20
GO:0043407	negative regulation of MAP kinase activity	20/2886	77/18862	0.0104405	0.0764266	0.0616186	DUSP9/AGT/RGS2/DUSP10/DUSP1/SPRY4/PPP2CA/GBA/DUSP18/STK38/CD300A/DUSP14/SPRED2/DNAJA1/DUSP6/DUSP16/PDCD4/DUSP5/DUSP4/DUSP8	20
GO:0018107	peptidyl-threonine phosphorylation	28/2886	118/18862	0.0104713	0.0764266	0.0616186	DGKQ/CEMIP/DYRK3/CDC42BPA/VRK1/WNT5A/PRKAG2/BCL2/TTBK1/SPHK1/CDK5R1/EIF4G1/SPRED2/TTK/ULK1/MAP3K12/LRRK2/CLK1/CDK1/DDIT4/PARD3/RIPK2/DMTN/SIRT2/CDK10/PLK1/DYRK1A/TRIM6	28
GO:0031398	positive regulation of protein ubiquitination	28/2886	118/18862	0.0104713	0.0764266	0.0616186	DDX3X/ARRDC4/SPRTN/PAXIP1/CDC20/BCL10/SPHK1/UBB/PELI1/TOPORS/HSPA5/CHFR/CRY1/LRRK2/CUL3/BTRC/BMI1/RIPK2/FBXW7/UBE2S/PLK1/RPS2/ARRDC3/CDC20B/TRIB3/DCUN1D5/BIRC3/CTR9	28
GO:0045931	positive regulation of mitotic cell cycle	28/2886	118/18862	0.0104713	0.0764266	0.0616186	DDX3X/PBX1/HSPA2/CDC25C/CDC23/HYAL1/KMT2E/ASNS/TAL1/CDC7/PPP1R10/CCDC57/CDC6/CDC27/SPHK1/USP22/HES1/EIF4G1/ANXA1/CUL3/CDK1/ANKRD17/CDK10/CCNB1/RGCC/PLCB1/USP2/CDCA5	28
GO:0006469	negative regulation of protein kinase activity	51/2886	243/18862	0.0105006	0.0765146	0.0616896	DUSP9/NR2F2/PRKAR1B/AGT/RGS2/DUSP10/DUSP1/NPM1/SPRY4/PPP2CA/PRKAG2/PRKAR2B/ERRFI1/EPHB2/CDKN2C/GADD45A/ADAR/GBA/DUSP18/PTPN2/TRIM27/STK38/CHMP6/HEXIM2/CD300A/DUSP14/PAK2/SH3BP5/TRIB2/SOCS5/SPRED2/TNFAIP3/DNAJA1/DUSP6/DUSP16/PDCD4/DUSP5/ITPRIP/SIRT1/TRIB1/DEPTOR/DUSP4/CDKN2D/DBNDD1/PLK1/SOCS1/LATS2/TRIB3/PKIG/CHORDC1/DUSP8	51
GO:0010799	regulation of peptidyl-threonine phosphorylation	14/2886	48/18862	0.0106482	0.0765146	0.0616896	DGKQ/CEMIP/WNT5A/PRKAG2/SPHK1/EIF4G1/SPRED2/DDIT4/PARD3/RIPK2/DMTN/SIRT2/PLK1/TRIM6	14
GO:0046605	regulation of centrosome cycle	14/2886	48/18862	0.0106482	0.0765146	0.0616896	NPM1/SPICE1/STIL/CEP76/PKHD1/SIRT1/TMEM67/PLK4/CHMP2A/ATF5/PLK2/AURKA/CHORDC1/NAT10	14
GO:0052372	modulation by symbiont of entry into host	14/2886	48/18862	0.0106482	0.0765146	0.0616896	LGALS1/TRIM38/TRIM27/TRIM10/TRIM26/TRIM25/LGALS9/PTX3/SNX3/HS3ST5/TRIM68/TRIM6/TRIM5/IFITM1	14
GO:0051607	defense response to virus	54/2886	260/18862	0.0106702	0.0765146	0.0616896	ISG20/TRIM56/LYST/RNASEL/DHX9/TRAF3/HSP90AA1/TRIM52/IRF1/PARP9/DTX3L/SETD2/IL6/ISG15/ATAD3A/PUM1/ZC3H12A/TTC4/POLR3C/ADAR/IFI16/RIOK3/PMAIP1/BCL2/C1QBP/PUM2/TNFAIP3/OASL/OAS3/USP15/STAT2/GPAM/IFIT3/DDX21/DDIT4/BNIP3L/TLR3/ABCE1/ELMOD2/ANKRD17/ZNF175/ILF3/ZDHHC1/SERINC5/SKP2/POLR3F/MAVS/SERINC3/RNF26/BIRC3/TRIM6/TRIM5/UNC93B1/IFITM1	54
GO:0140546	defense response to symbiont	54/2886	260/18862	0.0106702	0.0765146	0.0616896	ISG20/TRIM56/LYST/RNASEL/DHX9/TRAF3/HSP90AA1/TRIM52/IRF1/PARP9/DTX3L/SETD2/IL6/ISG15/ATAD3A/PUM1/ZC3H12A/TTC4/POLR3C/ADAR/IFI16/RIOK3/PMAIP1/BCL2/C1QBP/PUM2/TNFAIP3/OASL/OAS3/USP15/STAT2/GPAM/IFIT3/DDX21/DDIT4/BNIP3L/TLR3/ABCE1/ELMOD2/ANKRD17/ZNF175/ILF3/ZDHHC1/SERINC5/SKP2/POLR3F/MAVS/SERINC3/RNF26/BIRC3/TRIM6/TRIM5/UNC93B1/IFITM1	54
GO:0090101	negative regulation of transmembrane receptor protein serine/threonine kinase signaling pathway	31/2886	134/18862	0.010695	0.0765146	0.0616896	SMURF1/CTDSPL2/SMAD6/TGFB3/PPARG/WNT5A/NBL1/ONECUT2/HSPA1A/ZNF451/CD109/NOG/MTMR4/UBB/VEPH1/SKIL/EMILIN1/RPS27A/SPRED2/HSPA5/UBC/CHST11/LEMD3/LRP2/DKK1/SIRT1/UBA52/TGFB1I1/VASN/SLC2A10/PMEPA1	31
GO:0002024	diet induced thermogenesis	5/2886	10/18862	0.0107309	0.0765146	0.0616896	ADRB2/OMA1/APPL2/SCTR/ADRB1	5
GO:0015808	L-alanine transport	5/2886	10/18862	0.0107309	0.0765146	0.0616896	SLC38A5/SLC7A8/SLC38A3/SLC38A7/SLC3A2	5
GO:0015911	long-chain fatty acid import across plasma membrane	5/2886	10/18862	0.0107309	0.0765146	0.0616896	THBS1/SLC2A1/ACSL5/ACSL1/AKT2	5
GO:0035907	dorsal aorta development	5/2886	10/18862	0.0107309	0.0765146	0.0616896	DLL4/NGFR/ENG/BMPR1A/HEY1	5
GO:0045625	regulation of T-helper 1 cell differentiation	5/2886	10/18862	0.0107309	0.0765146	0.0616896	TNFSF4/HLX/SOCS5/ANXA1/RIPK2	5
GO:0045647	negative regulation of erythrocyte differentiation	5/2886	10/18862	0.0107309	0.0765146	0.0616896	KLF13/HSPA9/NCAPG2/TAL1/ZFP36	5
GO:0097084	vascular associated smooth muscle cell development	5/2886	10/18862	0.0107309	0.0765146	0.0616896	VEGFA/HES1/ENG/SGCB/ADM	5
GO:2000234	positive regulation of rRNA processing	5/2886	10/18862	0.0107309	0.0765146	0.0616896	HEATR1/RIOK1/WDR43/WDR75/UTP15	5
GO:2000480	negative regulation of cAMP-dependent protein kinase activity	5/2886	10/18862	0.0107309	0.0765146	0.0616896	PRKAR1B/PRKAG2/PRKAR2B/SIRT1/PKIG	5
GO:2000508	regulation of dendritic cell chemotaxis	5/2886	10/18862	0.0107309	0.0765146	0.0616896	LGALS9/C1QBP/IL12A/CALR/GAS6	5
GO:0043488	regulation of mRNA stability	41/2886	188/18862	0.010762	0.0766484	0.0617975	HNRNPC/RNASEL/DHX9/SAMD4A/PSME1/NPM1/PSMD6/PUM1/ZC3H12A/YBX1/CSDC2/EIF4ENIF1/HSPA1A/PSMD3/PSMC5/AXIN2/UBB/TNFSF13/FXR1/PSMD2/EIF4G1/PUM2/RPS27A/XPO1/UBC/GIGYF2/PSMD14/VIM/YWHAZ/PABPC1/EXOSC9/HNRNPD/ZFP36/UBA52/ELAVL1/PARN/E2F1/PSMA7/YTHDF1/HSPA8/PSMC3	41
GO:0051258	protein polymerization	60/2886	294/18862	0.0108012	0.0768392	0.0619513	MID1IP1/BAIAP2L1/SLIT2/TUBGCP5/CAMSAP2/HSP90AA1/NIN/PFN3/FCHSD1/CAPZA2/TUBGCP6/CDC42EP1/INPP5J/ARHGAP28/RANBP9/TRIM27/HSPA1A/HSPA1B/TTBK1/CCDC57/BAIAP2/TUBG1/CDK5R1/MIEF2/FLII/CLASP2/CDC42EP3/PRKCE/SPTBN1/TMSB10/KANK1/DNM1/HIP1R/CLIP1/TRPV4/NAV3/AVIL/FKBP4/VIL1/ADD3/MSRB2/DMTN/CHMP2A/UBE2S/VASP/SPTBN4/GPX4/COTL1/CORO7/MAP1B/OCLN/DIAPH3/DYRK1A/TPX2/PREX1/PAK1/RPS3/TRIM6/CKAP5/SSH3	60
GO:0001844	protein insertion into mitochondrial membrane involved in apoptotic signaling pathway	10/2886	30/18862	0.0110187	0.0780273	0.0629092	BMF/TP53BP2/TP73/PMAIP1/BCL2/TFDP2/BCL2L11/YWHAZ/BBC3/E2F1	10
GO:0035666	TRIF-dependent toll-like receptor signaling pathway	10/2886	30/18862	0.0110187	0.0780273	0.0629092	TRAF3/RIPK1/UBB/RPS27A/UBC/TANK/IKBKB/TLR3/UBA52/BIRC3	10
GO:0090183	regulation of kidney development	10/2886	30/18862	0.0110187	0.0780273	0.0629092	AGT/SIX4/SMO/WNT2B/VEGFA/NOG/PAX8/MYC/FOXD1/LGR4	10
GO:1902235	regulation of endoplasmic reticulum stress-induced intrinsic apoptotic signaling pathway	10/2886	30/18862	0.0110187	0.0780273	0.0629092	PTPN2/PMAIP1/HSPA1A/EIF2AK3/BCL2L11/DDIT3/TMBIM6/LRRK2/SIRT1/SERINC3	10
GO:0002066	columnar/cuboidal epithelial cell development	12/2886	39/18862	0.0112079	0.0790046	0.0636971	HIF1A/WNT5A/RHEB/SMO/CDH2/FASN/RARG/KLF5/SRC/HNF4A/ARNTL/PAX6	12
GO:0045742	positive regulation of epidermal growth factor receptor signaling pathway	12/2886	39/18862	0.0112079	0.0790046	0.0636971	AGT/ADORA1/HBEGF/BCAR3/DOK1/HIP1R/DGKD/FBXW7/AREG/EREG/PLAUR/ARAP1	12
GO:0045841	negative regulation of mitotic metaphase/anaphase transition	12/2886	39/18862	0.0112079	0.0790046	0.0636971	CENPF/DUSP1/CDC20/KLHL22/AURKB/BUB1/TTK/KNTC1/RAD21/PLK1/CCNB1/ATM	12
GO:0032868	response to insulin	57/2886	278/18862	0.0115761	0.0814147	0.0656403	UPRT/FOXO4/BAIAP2L1/VGF/SH2B2/CPEB2/PKM/MAX/EGR1/ATP6V1A/PPARG/INSIG1/ATP6V0A4/ERRFI1/SLC25A33/WDTC1/SLC2A1/BCAR3/PTPN2/BAIAP2/PIP4K2B/HDAC5/PDK2/STXBP4/KHK/PHIP/KANK1/SLC27A4/TSC1/CRY1/APPL2/NR1H4/C2CD5/CAPN10/PTPRN/GRB14/SORBS1/EGR2/SIRT1/EIF4EBP2/ECHDC3/GPT/ATP6V1H/AKT2/INSR/SOCS1/ZBED3/FOXO1/SNX5/TRIB3/SRC/LPIN3/SIK2/PAK1/INPPL1/ADM/CAT	57
GO:0008585	female gonad development	23/2886	93/18862	0.0117016	0.0821107	0.0662014	ZFX/MMP14/VGF/SLIT2/ROBO2/INHBA/BCL2/FOXC1/VEGFA/UBB/TIPARP/PTX3/EIF2B5/HSPA5/PTPRN/IDH1/SIRT1/EREG/SOD1/SRC/ATM/PGR/FZD4	23
GO:0014013	regulation of gliogenesis	23/2886	93/18862	0.0117016	0.0821107	0.0662014	DUSP10/PPARG/RHEB/EZH2/IL6/TP73/TTBK1/NR1D1/NOG/RNF112/ASPA/HES1/UFL1/NR2E1/HDAC2/RNF10/LRP2/EGR2/SIRT2/LDLR/E2F1/BMP2/CLCF1	23
GO:2001056	positive regulation of cysteine-type endopeptidase activity	34/2886	151/18862	0.0118239	0.0828743	0.066817	DDX3X/FIS1/CTSH/PRR7/PPARG/CASP9/BCL10/NGF/IFI16/TBC1D10A/PMAIP1/RIPK1/TTBK1/NGFR/LGALS9/EIF2AK3/BCL2L11/FYN/SLC1A1/ACER2/ANP32B/TNFSF15/HIP1R/HSPD1/FAS/SIRT1/MYC/RIPK2/TNFRSF10B/DLC1/CARD8/BBC3/PDCD5/RPS3	34
GO:0010803	regulation of tumor necrosis factor-mediated signaling pathway	17/2886	63/18862	0.0118625	0.0830113	0.0669275	SPPL2A/PTPN2/RIPK1/HSPA1A/HSPA1B/SPHK1/TNFAIP3/TRIM32/TRAF1/NR1H4/IKBKB/CARD8/SPPL2B/CYLD/GAS6/SPATA2/BIRC3	17
GO:0072080	nephron tubule development	22/2886	88/18862	0.0118703	0.0830113	0.0669275	GPC3/AGT/PBX1/SIX4/SMO/HEYL/WNT2B/WNT7B/BCL2/VEGFA/NOG/HES1/PAX8/CD24/AHI1/PTCH1/MYC/PKD1/FOXD1/GZF1/BMP2/LGR4	22
GO:0006817	phosphate ion transport	9/2886	26/18862	0.0119789	0.0833938	0.0672359	SLC34A1/IP6K2/ATF4/SLC17A1/SLC17A3/SLC20A1/SLC25A3/SLC20A2/SLC37A4	9
GO:0021772	olfactory bulb development	9/2886	26/18862	0.0119789	0.0833938	0.0672359	SLIT2/ROBO2/WNT5A/NR2E1/AGTPBP1/LRRK2/CHD7/ATF5/RPGRIP1L	9
GO:0048843	negative regulation of axon extension involved in axon guidance	9/2886	26/18862	0.0119789	0.0833938	0.0672359	PLXNA3/SEMA4B/SEMA7A/WNT5A/SEMA3B/SEMA3C/SEMA6C/WNT3/SEMA4C	9
GO:0060351	cartilage development involved in endochondral bone morphogenesis	9/2886	26/18862	0.0119789	0.0833938	0.0672359	THBS3/AXIN2/IFT80/COL27A1/TRPV4/RARG/SMPD3/TSKU/SERPINH1	9
GO:0001707	mesoderm formation	18/2886	68/18862	0.0120189	0.0834838	0.0673085	WNT5A/EXOC4/INHBA/EPHA2/TAL1/FOXC1/WNT3/ITGB4/ITGA3/NOG/KDM6B/GJA1/KLF4/TXNRD1/HMGA2/DKK1/BMPR1A/ITGA2	18
GO:0035050	embryonic heart tube development	20/2886	78/18862	0.0120716	0.0836621	0.0674522	BBS4/HIF1A/IFT122/WNT5A/SMO/STIL/FOXC1/CCDC40/CCDC103/HES1/CCDC39/IFT172/AHI1/ENG/TBR1/SUFU/FOXH1/PITX2/MEGF8/C2CD3	20
GO:1901028	regulation of mitochondrial outer membrane permeabilization involved in apoptotic signaling pathway	13/2886	44/18862	0.01215	0.0839235	0.067663	TP53BP2/TP73/CHCHD10/PMAIP1/BCL2/HSPA1A/TMEM102/TFDP2/SLC35F6/HIP1R/YWHAZ/BBC3/E2F1	13
GO:1905819	negative regulation of chromosome separation	13/2886	44/18862	0.01215	0.0839235	0.067663	CENPF/DUSP1/CDC20/KLHL22/AURKB/BUB1/TTK/CHFR/KNTC1/RAD21/PLK1/CCNB1/ATM	13
GO:0016571	histone methylation	30/2886	130/18862	0.0123128	0.0848582	0.0684166	KDM6A/WDR61/SETD5/SETD2/PAXIP1/KMT2C/EZH2/KMT2E/CHD5/MTHFR/RLF/MTF2/PYGO2/MLLT6/EZH1/SUPT6H/DPY30/TET3/PHF19/NR1H4/IWS1/SIRT1/SUV39H2/ASH2L/ZNF274/FBL/PAF1/DNMT1/PRMT2/CTR9	30
GO:0060538	skeletal muscle organ development	35/2886	157/18862	0.0125462	0.0859907	0.0693297	NR2F2/COPS2/ZBTB18/ACTA1/BTG2/ATF3/HLX/SIX4/CFL2/EGR1/MYH15/SMO/HEYL/MEF2D/IGSF8/MAFF/BCL2/DDX5/NR1D2/FXR1/FOXN2/CNTFR/MYL6/GPC1/ANKRD1/EGR2/BIN3/SAP30/MYH14/EEF2/HOMER1/NLN/KLF5/GPCPD1/ARNTL	35
GO:0000289	nuclear-transcribed mRNA poly(A) tail shortening	11/2886	35/18862	0.0126056	0.0859907	0.0693297	BTG2/SAMD4A/CNOT4/TNRC6B/EIF4ENIF1/PNLDC1/AGO2/PABPC1/ZFP36/CNOT1/PARN	11
GO:0021955	central nervous system neuron axonogenesis	11/2886	35/18862	0.0126056	0.0859907	0.0693297	SLIT2/HSP90AA1/NIN/EPHB2/CHRNB2/HSP90AB1/NR2E1/TCTN1/NR4A2/SPTBN4/TSKU	11
GO:0048854	brain morphogenesis	11/2886	35/18862	0.0126056	0.0859907	0.0693297	BBS4/FBXW11/WNT5A/SMO/GBA/CDH2/FZD6/SHANK1/BBS2/SPEF2/SHANK2	11
GO:0070536	protein K63-linked deubiquitination	11/2886	35/18862	0.0126056	0.0859907	0.0693297	YOD1/UIMC1/TNFAIP3/USP20/PSMD14/ZRANB1/STAMBPL1/OTUD4/CYLD/USP25/SPATA2	11
GO:0001780	neutrophil homeostasis	6/2886	14/18862	0.012658	0.0859907	0.0693297	IL6/PIK3CD/PDE4B/ANXA1/SLC7A11/AXL	6
GO:0031958	corticosteroid receptor signaling pathway	6/2886	14/18862	0.012658	0.0859907	0.0693297	NR3C1/ARID1A/PER1/CRY1/CALR/ARNTL	6
GO:0035437	maintenance of protein localization in endoplasmic reticulum	6/2886	14/18862	0.012658	0.0859907	0.0693297	INSIG1/ANKRD13C/GJA1/HSPA5/OS9/GRIK5	6
GO:0071474	cellular hyperosmotic response	6/2886	14/18862	0.012658	0.0859907	0.0693297	LETM1/AKR1B1/ERRFI1/SLC2A1/XRCC6/XRCC5	6
GO:1902667	regulation of axon guidance	6/2886	14/18862	0.012658	0.0859907	0.0693297	SLIT2/VEGFA/TBR1/ZSWIM4/ZSWIM6/YTHDF1	6
GO:2000232	regulation of rRNA processing	6/2886	14/18862	0.012658	0.0859907	0.0693297	HEATR1/RIOK1/USP36/WDR43/WDR75/UTP15	6
GO:0008406	gonad development	45/2886	212/18862	0.0127254	0.0862327	0.0695247	MAMLD1/ZFX/MMP14/VGF/SLIT2/TGFB2/SIX4/REC8/ROBO2/WNT5A/INHBA/AGO4/WNT2B/PATZ1/BCL2/FOXC1/VEGFA/BRIP1/UBB/SOX15/TIPARP/PTX3/EIF2B5/BCL2L11/HSPA5/DHX37/DHH/PTPRN/IDH1/LRP2/SIRT1/TLR3/ING2/HMGB2/EREG/HMGCS1/FGF9/SOD1/SRC/SPATA2/TFAP2C/ATM/PGR/FZD4/KIF18A	45
GO:0045932	negative regulation of muscle contraction	8/2886	22/18862	0.0127494	0.0862327	0.0695247	RGS2/ADORA1/ADRB2/DOCK4/ZC3H12A/PRKG1/DOCK5/SOD1	8
GO:0051131	chaperone-mediated protein complex assembly	8/2886	22/18862	0.0127494	0.0862327	0.0695247	HSP90AA1/HSPA4/HSPA1A/HSP90AB1/CCT2/PTGES3/HSPD1/BBS12	8
GO:2000648	positive regulation of stem cell proliferation	8/2886	22/18862	0.0127494	0.0862327	0.0695247	FERMT2/KAT7/NR2E1/GJA1/HMGA2/VEGFC/CCNE1/ATXN1L	8
GO:0072132	mesenchyme morphogenesis	14/2886	49/18862	0.0128579	0.0868715	0.0700398	MSX1/ACTA1/TGFB2/ROBO2/WNT5A/EXOC4/HEYL/FOXC1/NOG/ENG/BMPR1A/MYC/HEY1/BMP2	14
GO:0042593	glucose homeostasis	48/2886	229/18862	0.0130305	0.0879415	0.0709024	CDK16/VGF/HIF1A/FGFR4/EFNA5/CASR/RAF1/PPARG/IL6/LEPR/PIM3/LGALS1/PTPN2/NGFR/NR1D1/PDK2/NME2/STXBP4/TRA2B/PRKCE/HMGN3/PTCH1/RPS6/HNF1A/CRY1/APPL2/NR1H4/LRP1/ADIPOR2/PTPRN/IGFBP5/TCF7L2/SIRT1/HKDC1/HK1/KIF5B/FABP5/TRPM4/GRIK5/INSR/SSTR5/OXCT1/GAS6/FOXO1/BACE2/TIAM1/HNF4A/PAX6	48
GO:0006865	amino acid transport	34/2886	152/18862	0.0130501	0.0879733	0.0709281	SLC16A2/SLC38A5/SLC7A8/SLC7A7/RGS2/PPFIA4/ADORA1/SFXN1/SLC25A48/SLC6A6/SLC38A3/NFKBIE/SLC17A5/LLGL2/SLC47A1/CTNS/SLC25A38/SLC3A1/SFXN5/GJA1/SLC1A1/GLS2/SLC38A2/PER2/SFXN3/SLC7A11/PPFIA3/SLC1A5/SLC7A6/SLC38A7/SLC6A18/SLC3A2/SLC25A45/PPFIA1	34
GO:0003128	heart field specification	7/2886	18/18862	0.0131063	0.0879733	0.0709281	ROBO2/WNT5A/AXIN2/LRP2/DKK1/FOXH1/BMP2	7
GO:0007039	protein catabolic process in the vacuole	7/2886	18/18862	0.0131063	0.0879733	0.0709281	ATP13A2/GBA/MGAT3/LRP1/LRP2/LDLR/TPP1	7
GO:0051895	negative regulation of focal adhesion assembly	7/2886	18/18862	0.0131063	0.0879733	0.0709281	MMP14/THBS1/CLASP2/LRP1/DMTN/DLC1/SRC	7
GO:0150118	negative regulation of cell-substrate junction organization	7/2886	18/18862	0.0131063	0.0879733	0.0709281	MMP14/THBS1/CLASP2/LRP1/DMTN/DLC1/SRC	7
GO:0043525	positive regulation of neuron apoptotic process	15/2886	54/18862	0.0133663	0.0894591	0.072126	TGFB2/SRPK2/JUN/ATF4/CDK5R1/BCL2L11/GRIK2/FOXO3/DDIT3/ATF2/FBXW7/GRIK5/MYBL2/BACE1/ATM	15
GO:0045071	negative regulation of viral genome replication	15/2886	54/18862	0.0133663	0.0894591	0.072126	ISG20/RNASEL/SRPK2/ISG15/IFI16/OASL/OAS3/HMGA2/PARP10/ILF3/MPHOSPH8/MAVS/TRIM6/FAM111A/IFITM1	15
GO:0032200	telomere organization	38/2886	174/18862	0.0133711	0.0894591	0.072126	HDAC8/HNRNPC/TEP1/NEK2/HSP90AA1/YLPM1/GNL3/HNRNPA2B1/HUS1/CCT6A/ZBTB48/EXOSC10/CCT3/XRCC6/PPP1R10/HSP90AB1/PRIM2/AURKB/SMC6/CCT4/CCT7/TCP1/CCT2/PTGES3/XRCC5/MYC/GAR1/HNRNPD/CCNE1/SMG1/PARN/CCT5/CCT8/SRC/ATM/POLD3/NAT10/POLA2	38
GO:0003206	cardiac chamber morphogenesis	27/2886	115/18862	0.0135521	0.0904741	0.0729443	SLIT2/DLL4/SMAD6/TNNT2/TGFB2/HIF1A/ROBO2/WNT5A/SMO/SEMA3C/DHRS3/HEYL/RBM15/FOXC1/FZD2/NOG/HES1/FHL2/ENG/LRP2/BMPR1A/FOXH1/HEY1/CHD7/ZFPM1/POU4F1/BMP2	27
GO:0007519	skeletal muscle tissue development	33/2886	147/18862	0.013568	0.0904823	0.0729509	NR2F2/COPS2/ZBTB18/ACTA1/BTG2/ATF3/HLX/SIX4/CFL2/EGR1/MYH15/SMO/HEYL/MEF2D/IGSF8/MAFF/BCL2/DDX5/NR1D2/FOXN2/MYL6/GPC1/ANKRD1/EGR2/BIN3/SAP30/MYH14/EEF2/HOMER1/NLN/KLF5/GPCPD1/ARNTL	33
GO:0006893	Golgi to plasma membrane transport	16/2886	59/18862	0.0137072	0.0913122	0.0736201	CNST/AMN/EXOC4/STEAP2/RSC1A1/MACF1/PKDCC/SPTBN1/KRT18/ANK3/OPTN/BBS2/GGA2/SYS1/BBS1/OSBPL5	16
GO:0030521	androgen receptor signaling pathway	12/2886	40/18862	0.0138332	0.0917563	0.0739781	HDAC6/ARID1A/HEYL/DAXX/DDX5/DNAJA1/SIRT1/FOXH1/DAB2/PRMT2/PMEPA1/TRIM68	12
GO:0032467	positive regulation of cytokinesis	12/2886	40/18862	0.0138332	0.0917563	0.0739781	KIF23/RHOA/CDC14A/CDC6/CENPV/AURKB/PRKCE/RACGAP1/CUL3/KIF20B/SSTR5/KIF3B	12
GO:0010965	regulation of mitotic sister chromatid separation	17/2886	64/18862	0.0139085	0.0920585	0.0742217	CENPF/DUSP1/CDC23/CDC20/KLHL22/CDC6/CDC27/AURKB/BUB1/TTK/KNTC1/CUL3/RAD21/CENPE/PLK1/CCNB1/ATM	17
GO:0050922	negative regulation of chemotaxis	17/2886	64/18862	0.0139085	0.0920585	0.0742217	PLXNA3/SEMA4B/SLIT2/THBS1/SEMA7A/DUSP1/ROBO2/WNT5A/SEMA3B/SEMA3C/NBL1/SEMA6C/PTPN2/WNT3/SEMA4C/DPP4/ANGPT2	17
GO:0072659	protein localization to plasma membrane	56/2886	275/18862	0.0139918	0.0925107	0.0745863	GRIPAP1/MMP14/SMURF1/CNPY4/EHD4/CNST/ATP2B4/AMN/NUMB/SQSTM1/RAPGEF6/RSC1A1/EPHA2/EPHB2/MACF1/TMEM59/PDZK1/PIP5K1A/PPIL2/CDH2/JUP/ITGA3/PIGW/LRRC15/CLASP2/PKDCC/PRKCE/SPTBN1/TMEM150A/MAP7/TPBG/PTCH1/LRP1/KRT18/C2CD5/VIL1/ZFYVE27/SORBS1/ANK3/KIF5B/OPTN/IKBKB/ANK2/SPTBN4/AKT2/CRB3/BBS2/GGA2/DAB2/GAS6/SYS1/PDZD3/ZDHHC5/BBS1/PPFIA1/PKP3	56
GO:0048147	negative regulation of fibroblast proliferation	10/2886	31/18862	0.0140832	0.0927385	0.07477	PPARG/CD300A/TRIM32/PAWR/PARP10/MYC/TP53INP1/PEX2/DACH1/MORC3	10
GO:0070306	lens fiber cell differentiation	10/2886	31/18862	0.0140832	0.0927385	0.07477	KDM5B/EPHA2/WNT7B/ATF4/SKIL/SPRED2/FRS2/VIM/SLC7A11/MAF	10
GO:0009855	determination of bilateral symmetry	29/2886	126/18862	0.0141794	0.093252	0.075184	BBS4/HIF1A/WNT5A/GALNT11/SMO/NBL1/STIL/RTTN/CCDC40/CCDC103/FOXJ1/NEK8/CCDC39/DRC1/IFT172/AHI1/ENG/DDIT3/TBR1/SUFU/DPCD/FOXH1/PITX2/MEGF8/PSKH1/RPGRIP1L/DNAH5/KIF3B/C2CD3	29
GO:0006892	post-Golgi vesicle-mediated transport	25/2886	105/18862	0.0143499	0.0941549	0.075912	RP2/AP1G2/SCAMP2/CNST/AMN/EXOC4/STEAP2/RSC1A1/MACF1/GOSR2/PKDCC/SPTBN1/KRT18/MYO1B/GBF1/ANK3/OPTN/AP1G1/BBS2/GGA2/CORO7/SCAMP1/SYS1/BBS1/OSBPL5	25
GO:0019395	fatty acid oxidation	25/2886	105/18862	0.0143499	0.0941549	0.075912	ABCD1/IVD/SLC27A2/ABCD4/PPARG/ACOX2/PRKAG2/CROT/MFSD2A/CPT2/HAO2/CPT1B/ECI2/ALDH3A2/ACAT2/NR4A3/ACADS/ACACB/APPL2/ADIPOR2/PHYH/PEX2/AKT2/ILVBL/AMACR	25
GO:0001837	epithelial to mesenchymal transition	34/2886	153/18862	0.0143776	0.0941549	0.075912	MSX1/TGFB2/TGFB3/HIF1A/FERMT2/PPP2CA/WNT5A/EZH2/IL6/HEYL/FOXC1/CUL7/DDX5/AXIN2/NOG/CLASP2/SPRED2/HDAC2/ENG/ALX1/HMGA2/TCF7L2/PDCD4/HEY1/FGFR1/LOXL2/HPN/TGFB1I1/VASN/DAB2/RGCC/TIAM1/BMP2/PHLDB1	34
GO:0010717	regulation of epithelial to mesenchymal transition	24/2886	100/18862	0.0147276	0.096189	0.0775519	TGFB2/TGFB3/FERMT2/PPP2CA/EZH2/IL6/FOXC1/AXIN2/NOG/CLASP2/SPRED2/HDAC2/ENG/ALX1/TCF7L2/LOXL2/HPN/TGFB1I1/VASN/DAB2/RGCC/TIAM1/BMP2/PHLDB1	24
GO:0010828	positive regulation of glucose transmembrane transport	13/2886	45/18862	0.0147504	0.096189	0.0775519	GPC3/MEF2A/RNASEL/NR4A3/C2CD5/CREBL2/ADIPOR2/CAPN10/SORBS1/AKT2/INSR/C3/OCLN	13
GO:0031018	endocrine pancreas development	13/2886	45/18862	0.0147504	0.096189	0.0775519	WNT5A/RHEB/SMO/IL6/CDH2/ONECUT2/HES1/EIF2AK3/ANXA1/FOXO1/HNF4A/ARNTL/PAX6	13
GO:0000077	DNA damage checkpoint	33/2886	148/18862	0.0149656	0.0974895	0.0786005	FOXO4/BTG2/UIMC1/CDC25C/XPC/CNOT4/HUS1/PLK3/GADD45A/MUC1/PPP1R10/DDX39B/CDC5L/BRIP1/RPL26/TFDP2/CRY1/HMGA2/ATF2/CDK1/WAC/ARID3A/FBXO31/CNOT1/RBL2/PLK1/EME2/CCNB1/PLK2/RGCC/E2F1/AURKA/ATM	33
GO:0043409	negative regulation of MAPK cascade	39/2886	181/18862	0.0152892	0.0992835	0.0800469	DUSP9/RPS6KA6/NDRG2/AGT/RGS2/ATF3/DUSP10/DACT1/DUSP1/SPRY4/PPP2CA/ERRFI1/EPHB2/GBA/DUSP18/PTPN2/RANBP9/STK38/CD300A/DUSP14/PER1/EMILIN1/SPRED2/CNKSR3/WNK2/DNAJA1/KLF4/AMBP/DUSP6/DUSP16/FOXM1/EIF3A/PDCD4/DUSP5/MYC/DUSP4/CYLD/FOXO1/DUSP8	39
GO:0007080	mitotic metaphase plate congression	14/2886	50/18862	0.0154063	0.0996486	0.0803412	CDC23/KIF2C/CHMP6/AURKB/CUL3/RRS1/CENPE/CHMP2A/KIF22/CCNB1/CHAMP1/PIBF1/KIF18A/CDCA5	14
GO:0032648	regulation of interferon-beta production	14/2886	50/18862	0.0154063	0.0996486	0.0803412	DDX3X/DHX9/TRAF3/HSP90AA1/IRF1/POLR3C/RIOK3/REL/RIPK2/TLR3/HMGB2/RELB/POLR3F/MAVS	14
GO:0042472	inner ear morphogenesis	22/2886	90/18862	0.0154099	0.0996486	0.0803412	SIX4/LRIG1/WNT5A/INSIG1/EPHB2/TTC39C/SLC44A4/TCAP/FZD2/PAX8/ROR2/TPRN/CEP290/LRIG3/GBX2/FRZB/PDZD7/FZD6/CHD7/HPN/SOD1/USH1C	22
GO:0061326	renal tubule development	22/2886	90/18862	0.0154099	0.0996486	0.0803412	GPC3/AGT/PBX1/SIX4/SMO/HEYL/WNT2B/WNT7B/BCL2/VEGFA/NOG/HES1/PAX8/CD24/AHI1/PTCH1/MYC/PKD1/FOXD1/GZF1/BMP2/LGR4	22
GO:0010955	negative regulation of protein processing	9/2886	27/18862	0.0155804	0.100436	0.0809761	SERPINE1/THBS1/CHAC1/TMEM59/SERPINF2/IL1R2/GAS1/LRRK2/CARD8	9
GO:0070199	establishment of protein localization to chromosome	9/2886	27/18862	0.0155804	0.100436	0.0809761	CCT6A/CCT3/CCT4/CCT7/TCP1/CCT2/CCT5/CCT8/ATM	9
GO:1903318	negative regulation of protein maturation	9/2886	27/18862	0.0155804	0.100436	0.0809761	SERPINE1/THBS1/CHAC1/TMEM59/SERPINF2/IL1R2/GAS1/LRRK2/CARD8	9
GO:0022612	gland morphogenesis	26/2886	111/18862	0.0156441	0.100741	0.0812222	ELF3/KDM5B/TGFB2/TGFB3/PLXNA1/PLXND1/WNT5A/SEMA3C/IL6/EPHA2/CSF1/BCL2/NOG/TNFAIP3/PTCH1/NTN4/FRS2/GLI1/RARG/CUL3/IGFBP5/BTRC/FBXW7/HPN/SRC/PGR	26
GO:1901879	regulation of protein depolymerization	21/2886	85/18862	0.0156983	0.100985	0.0814188	HDAC6/MID1IP1/CAMSAP2/CFL2/CAPZA2/NES/FLII/CLASP2/SPTBN1/TRPV4/NAV3/AVIL/LIMA1/VIL1/ADD3/DMTN/SPTBN4/APC2/MAP1B/TPX2/SPEF1	21
GO:0000187	activation of MAPK activity	34/2886	154/18862	0.0158121	0.101506	0.0818391	DUSP9/THBS1/AGT/TGFB3/IRAK2/WNT5A/TP73/MAP3K6/PEA15/MAPK11/TAB1/RIPK1/DAXX/MAP2K3/UBB/ALK/RPS27A/UBC/DUSP6/FRS2/MAP3K12/LRRK2/DUSP5/AVPI1/CDK1/RIPK2/UBA52/GDF15/INSR/MAPK8IP3/GHR/SOD1/BMP2/DRD4	34
GO:0006446	regulation of translational initiation	20/2886	80/18862	0.0159378	0.102126	0.0823385	DDX3X/PPP1R15B/EIF5/EIF2S1/NPM1/ATF4/CTIF/EIF4A2/EIF2B5/EIF4G1/EIF2AK3/HABP4/EIF2B1/EIF4B/EIF4EBP2/AGO2/EIF3H/RPL13A/EIF3K/YTHDF1	20
GO:0048839	inner ear development	38/2886	176/18862	0.0159773	0.102248	0.0824372	TGFB2/TGFB3/SIX4/SPARC/LRIG1/WNT5A/INSIG1/EPHB2/MYCL/IFT27/CECR2/TTC39C/ATP8B1/SLC44A4/SLC25A27/TCAP/FZD2/HES1/SOX2/PAX8/AHI1/ROR2/ANP32B/TPRN/CEP290/LRIG3/GBX2/FRZB/PDZD7/FZD6/CHD7/HPN/MAF/RPGRIP1L/SOD1/BMP2/TSKU/USH1C	38
GO:0018108	peptidyl-tyrosine phosphorylation	72/2886	369/18862	0.0161036	0.102602	0.0827222	BAZ1B/DGKQ/FGFR3/LTK/EHD4/AGT/ABL2/ADORA1/DYRK3/CLK4/FGFR4/HBEGF/PPP2CA/EFNA5/PARP9/PARP14/NCAPG2/IL6/ERRFI1/EPHA2/EPHB2/TAL1/DDR2/PTPN2/NEDD9/TTBK1/VEGFA/CHMP6/ERBB2/CD300A/MAP2K3/TMEM102/TNK2/PAK2/HES1/SH3BP5/IL12A/ALK/PKDCC/PRKCE/SOCS5/EFEMP1/CD24/FYN/HDAC2/TTK/ROR2/CAMKK2/ERBB3/CLK1/RIPK2/IL7/FGFR1/DMTN/FBXW7/AREG/EREG/IL11/AXL/INSR/CTF1/SOCS1/GHR/PRLR/GAS6/PIBF1/ITGB2/DYRK1A/SRC/WEE1/SCYL1/C…	72
GO:0046902	regulation of mitochondrial membrane permeability	19/2886	75/18862	0.0161155	0.102602	0.0827222	BMF/TP53BP2/TP73/CHCHD10/PMAIP1/BCL2/HSPA1A/TMEM102/TFDP2/SLC35F6/BCL2L11/HEBP2/HIP1R/ATF2/PPIF/YWHAZ/BNIP3L/BBC3/E2F1	19
GO:1901880	negative regulation of protein depolymerization	18/2886	70/18862	0.016216	0.103029	0.0830666	HDAC6/MID1IP1/CAMSAP2/CAPZA2/FLII/CLASP2/SPTBN1/NAV3/AVIL/LIMA1/VIL1/ADD3/DMTN/SPTBN4/APC2/MAP1B/TPX2/SPEF1	18
GO:0045017	glycerolipid biosynthetic process	54/2886	266/18862	0.0165021	0.104739	0.0844457	ACSL4/GK/ACHE/DGKQ/LPCAT4/ETNK2/PIK3C2B/ABHD5/PIK3CD/MFSD2A/PIP5K1A/CHKB/INPP5J/MPPE1/PIGN/SLC44A4/PIP4K2B/PGAP3/PCTP/MTMR4/PIGW/PLD1/LIPH/DGKG/SYNJ2/FIG4/PIP5K1B/AGPAT2/SCARB1/NR1H4/AVIL/GPD1/LPCAT3/DGKD/INPP5D/GPAM/FABP5/AGPAT5/ACSL1/FBXW7/PLA2G12A/PLEKHA4/LDLR/C3/PIP5K1C/DGKH/AGPAT3/SIK1/SYNJ1/CDS2/LPIN3/ATM/INPPL1/NR1H3	54
GO:1901186	positive regulation of ERBB signaling pathway	12/2886	41/18862	0.0169014	0.106898	0.0861862	AGT/ADORA1/HBEGF/BCAR3/DOK1/HIP1R/DGKD/FBXW7/AREG/EREG/PLAUR/ARAP1	12
GO:0000715	nucleotide-excision repair, DNA damage recognition	8/2886	23/18862	0.0169806	0.106898	0.0861862	COPS2/XPC/COPS3/UBB/RPS27A/UBC/COPS4/UBA52	8
GO:0034063	stress granule assembly	8/2886	23/18862	0.0169806	0.106898	0.0861862	DDX3X/STYXL1/DYNC1H1/EIF2S1/GRB7/PUM2/G3BP2/RPS23	8
GO:1903055	positive regulation of extracellular matrix organization	8/2886	23/18862	0.0169806	0.106898	0.0861862	IL6/DDR2/CLASP2/EMILIN1/RGCC/RUNX1/BMP2/PHLDB1	8
GO:0001738	morphogenesis of a polarized epithelium	32/2886	144/18862	0.0171636	0.107224	0.0864489	GPC3/SMURF1/DAAM1/DACT1/PSME1/PSMD6/WNT5A/RHOA/FZD1/CELSR2/CELSR1/PKHD1/PSMD3/FZD2/PSMC5/PSMD2/RSPO3/AHI1/ROR2/PSMD14/DKK1/FZD6/INTU/PLEKHA4/PARD6A/RPGRIP1L/DAB2/TIAM1/SPEF1/PSMA7/FZD4/PSMC3	32
GO:0006853	carnitine shuttle	5/2886	11/18862	0.0172231	0.107224	0.0864489	MID1IP1/PRKAG2/CPT2/CPT1B/ACACB	5
GO:0045628	regulation of T-helper 2 cell differentiation	5/2886	11/18862	0.0172231	0.107224	0.0864489	TNFSF4/HLX/BCL6/SOCS5/ANXA1	5
GO:0046501	protoporphyrinogen IX metabolic process	5/2886	11/18862	0.0172231	0.107224	0.0864489	IREB2/ALAS1/UROD/FECH/HMBS	5
GO:0071472	cellular response to salt stress	5/2886	11/18862	0.0172231	0.107224	0.0864489	LETM1/SLC12A6/AKR1B1/XRCC6/XRCC5	5
GO:0072205	metanephric collecting duct development	5/2886	11/18862	0.0172231	0.107224	0.0864489	AKR1B1/WNT7B/PAX8/PTCH1/PKD1	5
GO:0090084	negative regulation of inclusion body assembly	5/2886	11/18862	0.0172231	0.107224	0.0864489	DNAJA4/HSPA2/HSPA1A/HSPA1B/DNAJB1	5
GO:0097104	postsynaptic membrane assembly	5/2886	11/18862	0.0172231	0.107224	0.0864489	EPHB2/CDH2/NLGN1/CEL/NRXN2	5
GO:1902287	semaphorin-plexin signaling pathway involved in axon guidance	5/2886	11/18862	0.0172231	0.107224	0.0864489	PLXNA3/PLXNB3/PLXNA1/PLXND1/PLXNB1	5
GO:2000826	regulation of heart morphogenesis	5/2886	11/18862	0.0172231	0.107224	0.0864489	ROBO2/WNT5A/SMO/DKK1/BMP2	5
GO:1901889	negative regulation of cell junction assembly	10/2886	32/18862	0.0177417	0.109826	0.0885464	MMP14/THBS1/ROBO2/WNT5A/CLASP2/LRP1/IKBKB/DMTN/DLC1/SRC	10
GO:0048146	positive regulation of fibroblast proliferation	13/2886	46/18862	0.017755	0.109826	0.0885464	AGT/DHX9/WNT5A/DDR2/NGFR/CDC6/SPHK1/BMI1/MYC/EREG/CCNB1/GAS6/E2F1	13
GO:0043281	regulation of cysteine-type endopeptidase activity involved in apoptotic process	43/2886	205/18862	0.0177654	0.109826	0.0885464	DDX3X/FIS1/THBS1/CTSH/PRR7/FNIP1/RAF1/PPARG/CASP9/DHCR24/BCL10/NGF/PMAIP1/RIPK1/VEGFA/NGFR/LGALS9/PAK2/SOX2/EIF2AK3/BCL2L11/SLC1A1/ACER2/ANP32B/KLF4/TNFSF15/HIP1R/VIL1/HSPD1/FAS/SIRT1/MYC/TNFRSF10B/DLC1/CARD8/BBC3/PLAUR/PDCD5/CDKN2D/GAS6/SRC/RPS3/USP47	43
GO:0060972	left/right pattern formation	7/2886	19/18862	0.0180629	0.111026	0.0895146	SMO/FOXJ1/IFT172/AHI1/DPCD/PITX2/MEGF8	7
GO:2000369	regulation of clathrin-dependent endocytosis	7/2886	19/18862	0.0180629	0.111026	0.0895146	UBQLN2/SMAP1/TNK2/HIP1R/SCYL2/DGKD/DAB2	7
GO:0034968	histone lysine methylation	25/2886	107/18862	0.0180674	0.111026	0.0895146	KDM6A/WDR61/SETD5/SETD2/PAXIP1/KMT2C/EZH2/KMT2E/CHD5/RLF/MTF2/PYGO2/MLLT6/EZH1/SUPT6H/DPY30/TET3/PHF19/IWS1/SIRT1/SUV39H2/ASH2L/ZNF274/DNMT1/CTR9	25
GO:2001022	positive regulation of response to DNA damage stimulus	25/2886	107/18862	0.0180674	0.111026	0.0895146	ZCWPW1/MSX1/DHX9/UIMC1/PARP9/DTX3L/PAXIP1/SMCHD1/PMAIP1/DDX5/RPL26/SKIL/FXR1/SPRED2/HMGA2/FOXM1/PLA2R1/ANKRD1/SIRT1/MYC/PRKCG/TMEM161A/ATM/RPS3/FAM168A	25
GO:2000058	regulation of ubiquitin-dependent protein catabolic process	35/2886	161/18862	0.0182178	0.111729	0.0900806	UBQLN2/SMURF1/CSNK1A1/RYBP/RPL11/RNF19B/CDC20/PLK3/RPL5/GBA/HSPA1A/HSPA1B/HSP90AB1/RPL23/RPS7/TRIB2/SOCS5/XPO1/UFL1/CHFR/LRRK2/SUFU/WAC/TRIB1/EIF3H/FBXW7/SIRT2/KEAP1/PLK1/PLK2/CDC20B/DAB2/TRIB3/AURKA/UBXN1	35
GO:0035435	phosphate ion transmembrane transport	6/2886	15/18862	0.01841	0.111798	0.0901367	SLC34A1/SLC17A1/SLC20A1/SLC25A3/SLC20A2/SLC37A4	6
GO:0042053	regulation of dopamine metabolic process	6/2886	15/18862	0.01841	0.111798	0.0901367	HPRT1/CHRNB2/PNKD/NR4A2/ITGB2/DRD4	6
GO:0042069	regulation of catecholamine metabolic process	6/2886	15/18862	0.01841	0.111798	0.0901367	HPRT1/CHRNB2/PNKD/NR4A2/ITGB2/DRD4	6
GO:0042976	activation of Janus kinase activity	6/2886	15/18862	0.01841	0.111798	0.0901367	AGT/CD300A/SOCS1/GHR/PRLR/PIBF1	6
GO:0070831	basement membrane assembly	6/2886	15/18862	0.01841	0.111798	0.0901367	LAMB2/LAMB1/CLASP2/PXDN/NTN4/PHLDB1	6
GO:1900029	positive regulation of ruffle assembly	6/2886	15/18862	0.01841	0.111798	0.0901367	PLEKHM1/NLGN1/FAM98A/EPS8L1/DEF8/EPS8L2	6
GO:1900153	positive regulation of nuclear-transcribed mRNA catabolic process, deadenylation-dependent decay	6/2886	15/18862	0.01841	0.111798	0.0901367	TNRC6B/NANOS1/AGO2/PABPC1/ZFP36/CNOT1	6
GO:1901163	regulation of trophoblast cell migration	6/2886	15/18862	0.01841	0.111798	0.0901367	VEGFA/C1QBP/GJA1/AGO2/SYDE1/CALR	6
GO:2000052	positive regulation of non-canonical Wnt signaling pathway	6/2886	15/18862	0.01841	0.111798	0.0901367	GPC3/WNT5A/RSPO3/DKK1/PLEKHA4/DAB2	6
GO:0035082	axoneme assembly	19/2886	76/18862	0.0184905	0.112067	0.0903533	TTLL3/ZMYND10/TTC26/LRGUK/CCDC40/DNAH17/CCDC103/FOXJ1/IQCG/CCDC39/DRC1/ARMC2/DNAH7/BBS2/SPEF2/DNAH5/SPEF1/TTC12/DNAJB13	19
GO:0060395	SMAD protein signal transduction	19/2886	76/18862	0.0184905	0.112067	0.0903533	SMAD6/TGFB2/TGFB3/SMAD5/INHBA/JUN/KIAA0319/VEPH1/ATOH8/ROR2/BTBD11/BMPR1A/VIM/GDF15/SH2B1/DAB2/BMP2/HNF4A/SLC2A10	19
GO:0006473	protein acetylation	42/2886	200/18862	0.0186104	0.11252	0.0907185	DDX3X/EID1/TAF5L/MBIP/BAZ1A/JADE2/BRPF1/SETD5/PAXIP1/CHD5/PYGO2/MUC1/ATAT1/BRPF3/ZNF451/KANSL1/SPHK1/KAT7/TADA2A/USP22/PER1/HDAC2/GTF3C4/DIP2B/KANSL2/ING4/ATF2/HAT1/IWS1/TAF5/SIRT1/EPC1/KAT6A/NAA15/JADE1/NAA16/FOXO1/DIP2A/PHF20/TAF10/ARNTL/NAT10	42
GO:0010952	positive regulation of peptidase activity	42/2886	200/18862	0.0186104	0.11252	0.0907185	DDX3X/FIS1/CLDN4/CTSH/PSME1/PRR7/PPARG/CASP9/BCL10/NGF/IFI16/NCSTN/MAPK12/TBC1D10A/PMAIP1/RIPK1/TTBK1/NGFR/LGALS9/ANTXR1/EIF2AK3/BCL2L11/FYN/SLC1A1/ACER2/ANP32B/TNFSF15/HIP1R/HSPD1/PSMD14/TANK/FAS/SIRT1/MYC/RIPK2/TNFRSF10B/DLC1/CARD8/BBC3/PDCD5/ADRM1/RPS3	42
GO:0033045	regulation of sister chromatid segregation	18/2886	71/18862	0.0187022	0.112577	0.090765	CENPF/DUSP1/CDC23/CDC20/KLHL22/CDC6/CDC27/AURKB/BUB1/TTK/CHFR/KNTC1/CUL3/RAD21/CENPE/PLK1/CCNB1/ATM	18
GO:0033692	cellular polysaccharide biosynthetic process	18/2886	71/18862	0.0187022	0.112577	0.090765	GYG2/PPP1R3E/PGM2/NDST1/NR1D1/GYG1/B3GALNT1/PPP1CB/B3GNT2/FUT9/PER2/B3GNT7/SORBS1/PPP1R3C/NDST2/B3GNT8/AKT2/INSR	18
GO:1905818	regulation of chromosome separation	18/2886	71/18862	0.0187022	0.112577	0.090765	CENPF/DUSP1/CDC23/CDC20/KLHL22/CDC6/CDC27/AURKB/BUB1/TTK/CHFR/KNTC1/CUL3/RAD21/CENPE/PLK1/CCNB1/ATM	18
GO:0048645	animal organ formation	16/2886	61/18862	0.0188158	0.112949	0.0910649	ROBO2/WNT5A/HOXA3/WNT2B/PIM1/AXIN2/NOG/HES1/PAX8/FRS2/LRP2/TBR1/DKK1/BMPR1A/FOXH1/BMP2	16
GO:0070613	regulation of protein processing	16/2886	61/18862	0.0188158	0.112949	0.0910649	MMP14/SERPINE1/ADAM8/THBS1/CHAC1/F12/TMEM59/SERPINF2/IL1R2/GAS1/LRRK2/LPCAT3/CARD8/HPN/RUNX1/SRC	16
GO:1902108	regulation of mitochondrial membrane permeability involved in apoptotic process	17/2886	66/18862	0.0188188	0.112949	0.0910649	BMF/TP53BP2/TP73/CHCHD10/PMAIP1/BCL2/HSPA1A/TMEM102/TFDP2/SLC35F6/BCL2L11/HIP1R/ATF2/YWHAZ/BNIP3L/BBC3/E2F1	17
GO:0071773	cellular response to BMP stimulus	36/2886	167/18862	0.0190509	0.114121	0.0920092	GPC3/USP9X/SMURF1/MSX1/CTDSPL2/SMAD6/TGFB2/TGFB3/EGR1/SMAD5/RGMB/PPARG/WNT5A/NBL1/HEYL/HIVEP1/DDX5/ITGA3/NOG/FAM83G/HES1/SKIL/ROR2/ENG/LEMD3/USP15/LRP2/PDCD4/BMPR1A/MEGF8/GDF15/SMPD3/ZFYVE16/FOXD1/PELO/BMP2	36
GO:0018212	peptidyl-tyrosine modification	72/2886	372/18862	0.0191756	0.114757	0.0925221	BAZ1B/DGKQ/FGFR3/LTK/EHD4/AGT/ABL2/ADORA1/DYRK3/CLK4/FGFR4/HBEGF/PPP2CA/EFNA5/PARP9/PARP14/NCAPG2/IL6/ERRFI1/EPHA2/EPHB2/TAL1/DDR2/PTPN2/NEDD9/TTBK1/VEGFA/CHMP6/ERBB2/CD300A/MAP2K3/TMEM102/TNK2/PAK2/HES1/SH3BP5/IL12A/ALK/PKDCC/PRKCE/SOCS5/EFEMP1/CD24/FYN/HDAC2/TTK/ROR2/CAMKK2/ERBB3/CLK1/RIPK2/IL7/FGFR1/DMTN/FBXW7/AREG/EREG/IL11/AXL/INSR/CTF1/SOCS1/GHR/PRLR/GAS6/PIBF1/ITGB2/DYRK1A/SRC/WEE1/SCYL1/C…	72
GO:0043502	regulation of muscle adaptation	23/2886	97/18862	0.019196	0.114768	0.0925308	PARP2/MEF2A/GTF2IRD1/AGT/RGS2/ATP2B4/LMCD1/CAMK2B/ERRFI1/LMNA/DDX39B/MTMR4/FOXO3/UTRN/NR4A3/KLF4/P2RX4/IGFBP5/GLRX3/CAMK2G/FOXO1/PDE9A/PAK1	23
GO:0007094	mitotic spindle assembly checkpoint	11/2886	37/18862	0.0193321	0.114804	0.0925604	CENPF/DUSP1/CDC20/KLHL22/AURKB/BUB1/TTK/KNTC1/PLK1/CCNB1/ATM	11
GO:0033120	positive regulation of RNA splicing	11/2886	37/18862	0.0193321	0.114804	0.0925604	PRDX6/TRA2A/RBMXL1/HSPA1A/TRA2B/HABP4/SLC38A2/NCL/DYRK1A/HSPA8/NUP98	11
GO:0045740	positive regulation of DNA replication	11/2886	37/18862	0.0193321	0.114804	0.0925604	CACYBP/DHX9/DBF4/FAF1/JUN/CDC7/BCAR3/BRPF3/KAT7/GLI1/EREG	11
GO:0060412	ventricular septum morphogenesis	11/2886	37/18862	0.0193321	0.114804	0.0925604	SLIT2/TGFB2/ROBO2/WNT5A/HEYL/RBM15/FZD2/NOG/HES1/HEY1/ZFPM1	11
GO:0071173	spindle assembly checkpoint	11/2886	37/18862	0.0193321	0.114804	0.0925604	CENPF/DUSP1/CDC20/KLHL22/AURKB/BUB1/TTK/KNTC1/PLK1/CCNB1/ATM	11
GO:0071174	mitotic spindle checkpoint	11/2886	37/18862	0.0193321	0.114804	0.0925604	CENPF/DUSP1/CDC20/KLHL22/AURKB/BUB1/TTK/KNTC1/PLK1/CCNB1/ATM	11
GO:0030282	bone mineralization	26/2886	113/18862	0.0195041	0.115493	0.0931156	GPC3/PHEX/FGFR3/TGFB3/HIF1A/ADRB2/LOX/PTH1R/ISG15/TUFT1/DDR2/ATF4/AXIN2/IFT80/ATRAID/PKDCC/EIF2AK3/ROR2/TMEM119/MINPP1/BMPR1A/KLF10/TRPM4/SMPD3/BMP2/LGR4	26
GO:0030516	regulation of axon extension	22/2886	92/18862	0.019734	0.116631	0.0940331	PLXNA3/SEMA4B/SEMA7A/WNT5A/SEMA3B/SEMA3C/MACF1/SEMA6C/RTN4R/KIAA0319/VEGFA/WNT3/CDK5R1/SEMA4C/ANAPC2/LRP1/DIP2B/ZFYVE27/DPYSL2/MEGF8/MAP1B/PAK1	22
GO:0032088	negative regulation of NF-kappaB transcription factor activity	22/2886	92/18862	0.019734	0.116631	0.0940331	TRAF3/NFKBIA/IRAK2/ZC3H12A/FAF1/RWDD3/PKHD1/FOXJ1/PELI1/UFL1/TNFAIP3/KLF4/NR1H4/DDIT3/SIRT1/PARP10/G3BP2/CARD8/NFKBIB/CYLD/PRMT2/CAT	22
GO:0000027	ribosomal large subunit assembly	9/2886	28/18862	0.0199166	0.117373	0.0946314	DHX30/RPL11/RPL5/RPL38/RPLP0/RPL6/NOP2/RRS1/BRIX1	9
GO:0060147	regulation of posttranscriptional gene silencing	28/2886	124/18862	0.0201152	0.118318	0.0953935	DHX9/PPARG/LIMD1/NUP205/IL6/PUM1/AGO1/ZC3H12A/ADAR/TNRC6B/EIF4ENIF1/RIPK1/NUP153/DDX5/FXR1/EIF4G1/PUM2/RANBP2/ZC3H10/BCDIN3D/IPO8/EIF4E2/AGO2/ZFP36/ELAVL1/NUP155/NUP98/NUP160	28
GO:0045664	regulation of neuron differentiation	40/2886	190/18862	0.0204239	0.119517	0.09636	LTK/PBX1/NREP/RHOA/HOXA2/TP73/CASZ1/NBL1/HEYL/MYCL/NGF/EIF4ENIF1/BCL2/TIMP2/MMD/CDK5R1/RNF112/HES1/BCL6/NLGN1/SOX2/EIF4G1/ALK/NR2E1/TRIM32/SOCS2/LRRK2/HOXD3/DKK1/ZEB1/HEY1/FGFR1/DPYSL2/ZNF536/CALR/MAP1B/TIAM1/TGIF2/BMP2/DIXDC1	40
GO:0019432	triglyceride biosynthetic process	12/2886	42/18862	0.0204544	0.119517	0.09636	ACSL4/GK/MFSD2A/SCARB1/GPAM/ACSL1/FBXW7/LDLR/C3/SIK1/LPIN3/NR1H3	12
GO:0031670	cellular response to nutrient	12/2886	42/18862	0.0204544	0.119517	0.09636	PHEX/CASR/PPARG/TRIM24/HMOX1/PIM1/PDK2/BRIP1/NR1H4/VDR/KANK2/GAS6	12
GO:0033046	negative regulation of sister chromatid segregation	12/2886	42/18862	0.0204544	0.119517	0.09636	CENPF/DUSP1/CDC20/KLHL22/AURKB/BUB1/TTK/KNTC1/RAD21/PLK1/CCNB1/ATM	12
GO:0033048	negative regulation of mitotic sister chromatid segregation	12/2886	42/18862	0.0204544	0.119517	0.09636	CENPF/DUSP1/CDC20/KLHL22/AURKB/BUB1/TTK/KNTC1/RAD21/PLK1/CCNB1/ATM	12
GO:0062208	positive regulation of pattern recognition receptor signaling pathway	12/2886	42/18862	0.0204544	0.119517	0.09636	DDX3X/TLR5/PUM1/HSPA1A/HSPA1B/PUM2/PELI1/USP15/TLR3/ANKRD17/NR1H3/ZDHHC5	12
GO:2000816	negative regulation of mitotic sister chromatid separation	12/2886	42/18862	0.0204544	0.119517	0.09636	CENPF/DUSP1/CDC20/KLHL22/AURKB/BUB1/TTK/KNTC1/RAD21/PLK1/CCNB1/ATM	12
GO:0002062	chondrocyte differentiation	24/2886	103/18862	0.0208766	0.121639	0.098071	FGFR3/FGF18/PTH1R/WNT2B/MEF2D/MEX3C/AXIN2/IFT80/PKDCC/EFEMP1/EIF2AK3/COL27A1/CHST11/HMGA2/RARG/BMPR1A/LOXL2/MAF/SMPD3/RUNX1/BMP2/TSKU/SERPINH1/SOX6	24
GO:0055002	striated muscle cell development	24/2886	103/18862	0.0208766	0.121639	0.098071	MEF2A/ACTA1/TNNT2/OBSCN/SIX4/CFL2/LOX/SMO/FLNC/BCL2/VEGFA/TCAP/KRT19/FLII/CHRNB1/KRT8/OBSL1/NEB/NRAP/ANKRD1/LDB3/BIN3/SGCB/HOMER1	24
GO:0007368	determination of left/right symmetry	27/2886	119/18862	0.0208985	0.121652	0.0980814	BBS4/HIF1A/WNT5A/GALNT11/SMO/STIL/RTTN/CCDC40/CCDC103/FOXJ1/NEK8/CCDC39/DRC1/IFT172/AHI1/ENG/TBR1/SUFU/DPCD/FOXH1/PITX2/MEGF8/PSKH1/RPGRIP1L/DNAH5/KIF3B/C2CD3	27
GO:0032481	positive regulation of type I interferon production	19/2886	77/18862	0.0211275	0.12271	0.0989344	DDX3X/DHX9/HSP90AA1/IRF1/SETD2/POLR3C/IFI16/XRCC6/RIOK3/STAT6/XRCC5/HSPD1/NFKB2/RIPK2/TLR3/HMGB2/NFKB1/POLR3F/MAVS	19
GO:0032365	intracellular lipid transport	13/2886	47/18862	0.0211993	0.12271	0.0989344	ABCD1/MID1IP1/ABCD4/SGPP1/PRKAG2/CPT2/CPT1B/NPC1/ABCA2/ACACB/LDLR/OSBP/SYT7	13
GO:0045581	negative regulation of T cell differentiation	13/2886	47/18862	0.0211993	0.12271	0.0989344	TNFSF4/HLX/IRF1/ZC3H12A/PTPN2/ERBB2/FOXJ1/BCL6/SOCS5/ANXA1/NRARP/SOCS1/RUNX1	13
GO:0045839	negative regulation of mitotic nuclear division	13/2886	47/18862	0.0211993	0.12271	0.0989344	CENPF/DUSP1/CDC20/KLHL22/TOM1L2/AURKB/BUB1/TTK/KNTC1/RAD21/PLK1/CCNB1/ATM	13
GO:0043010	camera-type eye development	61/2886	310/18862	0.0213272	0.123335	0.0994381	NHS/ACHE/PDE6B/DLL4/BBS4/KDM5B/ATP2B4/TGFB2/MAX/HIF1A/CRYBG3/COL8A1/MYH15/IFT122/MITF/WNT5A/LAMB2/INHBA/EPHA2/EPHB2/MFSD2A/BCAR3/WNT2B/PYGO2/NES/WNT7B/ATF4/FOXC1/VEGFA/JMJD6/CTNS/SKIL/IFT172/EFEMP1/SPRED2/NR2E1/HDAC2/AHI1/SLC1A1/TOPORS/KLF4/SLC25A25/KDM2B/FRS2/RARG/TULP3/OBSL1/VIM/CHD7/SLC7A11/PITX2/SIX5/MAF/RPGRIP1L/PKNOX1/TGIF2/XRN2/FZD4/TSKU/USH1C/PAX6	61
GO:0048708	astrocyte differentiation	18/2886	72/18862	0.0214722	0.123855	0.0998575	LAMB2/SMO/IL6/TAL1/TTBK1/NR1D1/NOG/HES1/EIF2B5/NR2E1/ROR2/LRP1/VIM/LDLR/BACE2/BMP2/SOX6/CLCF1	18
GO:1903747	regulation of establishment of protein localization to mitochondrion	18/2886	72/18862	0.0214722	0.123855	0.0998575	TP53BP2/UBE2J2/TP73/PMAIP1/BCL2/HSPA1L/USP36/TFDP2/PARL/DNAJA1/LRRK2/BAG3/YWHAZ/BNIP3L/FBXW7/BBC3/PDCD5/E2F1	18
GO:0021761	limbic system development	23/2886	98/18862	0.0215564	0.124195	0.100132	PLXNA3/BBS4/BTG2/ATP2B4/EZH2/SMO/MFSD2A/BCAN/ATAT1/EZH1/CDK5R1/UBB/KDM6B/ALK/NR2E1/TSC1/TBR1/EMX2/KIF5B/BBS2/XRN2/ETS1/TSKU	23
GO:2000772	regulation of cellular senescence	14/2886	52/18862	0.0216429	0.124578	0.10044	VASH1/ARG2/NEK4/YBX1/HMGA1/BCL6/PAWR/HMGA2/SIRT1/BMPR1A/ING2/YPEL3/PLK2/ARNTL	14
GO:0003231	cardiac ventricle development	26/2886	114/18862	0.0216958	0.12465	0.100499	SLIT2/DLL4/SMAD6/TNNT2/TGFB2/HIF1A/MATR3/ROBO2/WNT5A/SEMA3C/HEYL/RBM15/FOXC1/FZD2/NOG/HES1/ENG/FRS2/LRP2/SUFU/BMPR1A/FOXH1/HEY1/CHD7/ZFPM1/POU4F1	26
GO:0034250	positive regulation of cellular amide metabolic process	35/2886	163/18862	0.021737	0.124655	0.100503	DDX3X/THBS1/LARP6/PKM/DHX9/SAMD4A/NPM1/IL6/RPL5/EIF3D/CTIF/DDX39B/EIF4A3/ERBB2/RPL26/EIF5A/C1QBP/PLD1/FXR1/EIF2B5/EIF4G1/HABP4/ABCA2/VIM/AGO2/PABPC1/HNRNPD/RPS9/BCL3/ELAVL1/EEF2/SMPD3/ITGA2/YTHDF1/NAT10	35
GO:0051785	positive regulation of nuclear division	15/2886	57/18862	0.0218468	0.124787	0.100609	MSX1/CDC23/WNT5A/CDC27/SPHK1/PHIP/CUL3/EREG/SIRT2/INSR/SMPD3/SH2B1/RGCC/PLCB1/AURKA	15
GO:0075733	intracellular transport of virus	15/2886	57/18862	0.0218468	0.124787	0.100609	VPS37D/NUP205/NUP153/KPNA2/UBB/RPS27A/XPO1/RANBP2/RAN/UBC/UBA52/NUP155/NUP98/NUP160/VPS37C	15
GO:0045604	regulation of epidermal cell differentiation	16/2886	62/18862	0.0218609	0.124787	0.100609	SGPP1/EZH2/ERRFI1/MYCL/MAFF/FOXC1/CD109/MAFG/NME2/HES1/GRHL1/PTCH1/VDR/ZFP36/KEAP1/RUNX1	16
GO:0006356	regulation of transcription by RNA polymerase I	10/2886	33/18862	0.0220544	0.125198	0.10094	HEATR1/ATF4/ERBB2/WDR43/EIF2AK3/IPPK/NCL/WDR75/UTP15/POU4F1	10
GO:0015695	organic cation transport	10/2886	33/18862	0.0220544	0.125198	0.10094	SLC7A8/SLC29A4/SLC25A48/PDZK1/SLC44A4/SLC47A1/SLC38A2/SLC25A42/SLC25A45/SLC22A18	10
GO:0045589	regulation of regulatory T cell differentiation	10/2886	33/18862	0.0220544	0.125198	0.10094	TNFSF4/CD46/DUSP10/IRF1/LGALS9/BCL6/SOCS1/RUNX1/SOX12/NFATC2	10
GO:0071539	protein localization to centrosome	10/2886	33/18862	0.0220544	0.125198	0.10094	BBS4/CEP350/STIL/SPAG5/UBXN2B/PARD6A/PIBF1/CEP250/AURKA/C2CD3	10
GO:1905332	positive regulation of morphogenesis of an epithelium	10/2886	33/18862	0.0220544	0.125198	0.10094	AGT/SIX4/SMO/PIK3CD/WNT2B/VEGFA/NOG/PAX8/GJA1/LGR4	10
GO:0003272	endocardial cushion formation	8/2886	24/18862	0.0221338	0.125533	0.10121	MSX1/TGFB2/ROBO2/HEYL/NOG/ENG/BMPR1A/BMP2	8
GO:0060966	regulation of gene silencing by RNA	28/2886	125/18862	0.0222479	0.125949	0.101546	DHX9/PPARG/LIMD1/NUP205/IL6/PUM1/AGO1/ZC3H12A/ADAR/TNRC6B/EIF4ENIF1/RIPK1/NUP153/DDX5/FXR1/EIF4G1/PUM2/RANBP2/ZC3H10/BCDIN3D/IPO8/EIF4E2/AGO2/ZFP36/ELAVL1/NUP155/NUP98/NUP160	28
GO:0150063	visual system development	70/2886	363/18862	0.0223065	0.126166	0.10172	NHS/SALL2/ACHE/PDE6B/DLL4/BBS4/PBX1/KDM5B/ATP2B4/TGFB2/MAX/HIF1A/SH3PXD2B/CRYBG3/COL8A1/MYH15/IFT122/MITF/WNT5A/LAMB2/INHBA/EPHA2/EPHB2/MFSD2A/BCAR3/WNT2B/PYGO2/NES/WNT7B/ATF4/BCL2/FOXC1/VEGFA/FSCN2/JMJD6/CTNS/SKIL/SOX2/IFT172/EFEMP1/SPRED2/NR2E1/HDAC2/AHI1/AGTPBP1/SLC1A1/TOPORS/KLF4/SLC25A25/KDM2B/CEP290/FRS2/RARG/TULP3/OBSL1/VIM/CHD7/SLC7A11/PITX2/SIX5/C3/MAF/RPGRIP1L/PKNOX1/TGIF2/XRN2/FZD4/TSK…	70
GO:1901800	positive regulation of proteasomal protein catabolic process	25/2886	109/18862	0.022504	0.127158	0.102521	UBQLN2/CSNK1A1/RNF19B/CDC20/PLK3/GBA/RNF185/HSPA1A/HSPA1B/OSBPL7/TRIB2/SOCS5/CHFR/LRRK2/TRIB1/FBXW7/SIRT2/KEAP1/PLK1/PLK2/CDC20B/DAB2/TRIB3/AURKA/PSMC3	25
GO:0043523	regulation of neuron apoptotic process	41/2886	197/18862	0.0228316	0.128664	0.103735	ADAM8/BTG2/TGFB2/TGFB3/HIF1A/SIX4/CPEB4/SRPK2/JUN/NGF/GBA/NES/ATF4/HMOX1/BCL2/HSP90AB1/CDK5R1/BCL2L11/GRIK2/FOXO3/FYN/CNTFR/KDM2B/DDIT3/LRP1/ERBB3/MAP3K12/ATF2/NR4A2/NRBP2/TRIM2/FBXW7/PRKCG/GRIK5/AXL/POU4F1/SOD1/MYBL2/BACE1/ATM/CLCF1	41
GO:0071222	cellular response to lipopolysaccharide	41/2886	197/18862	0.0228316	0.128664	0.103735	LDOC1/SERPINE1/TNFSF4/NFKBIA/TRIM41/IRAK2/WNT5A/RHOA/IL6/ZC3H12A/PDE4B/BCL10/NR1D1/HDAC5/SHPK/PRPF8/PRKCE/TNFAIP3/ADAMTS13/SCARB1/NR1H4/PDCD4/ANKRD1/MRC1/VIM/TRIB1/MTDH/RIPK2/HMGB2/NFKB1/CARD8/AXL/ZFP36/PAF1/NFKBIB/IRF8/SRC/TRIM5/CTR9/NR1H3/SIGIRR	41
GO:0032436	positive regulation of proteasomal ubiquitin-dependent protein catabolic process	21/2886	88/18862	0.0228675	0.128749	0.103804	UBQLN2/CSNK1A1/RNF19B/CDC20/PLK3/GBA/HSPA1A/HSPA1B/TRIB2/SOCS5/CHFR/LRRK2/TRIB1/SIRT2/KEAP1/PLK1/PLK2/CDC20B/DAB2/TRIB3/AURKA	21
GO:0006650	glycerophospholipid metabolic process	67/2886	346/18862	0.0229306	0.128987	0.103996	ACHE/DGKQ/LPCAT4/PRDX6/ETNK2/PIK3C2B/PLA1A/IP6K2/ABHD5/PIK3CD/MFSD2A/PIP5K1A/CHKB/INPP5J/MPPE1/PIGN/SLC44A4/IP6K3/PIP4K2B/PGAP3/PCTP/MTMR4/PIGW/PLD1/LIPH/DGKG/SOCS5/TMEM150A/SYNJ2/FIG4/PIP5K1B/AGPAT2/SCARB1/NR1H4/SOCS2/GPD1/LPCAT3/DGKD/INPP5D/INPP5A/GPAM/IPMK/FABP5/AGPAT5/ENPP6/PLA2G12A/PLEKHA4/LDLR/PNPLA6/PIP5K1C/CETP/SMG1/SOCS1/SERINC5/DGKH/AGPAT3/SYNJ1/CDS2/GPCPD1/PLCB1/LPIN3/SERINC3/APOA4/ATM…	67
GO:0045069	regulation of viral genome replication	20/2886	83/18862	0.023479	0.131952	0.106386	DDX3X/ISG20/RNASEL/SRPK2/ISG15/ADAR/IFI16/BCL2/TOP2A/OASL/OAS3/HMGA2/PARP10/PABPC1/ILF3/MPHOSPH8/MAVS/TRIM6/FAM111A/IFITM1	20
GO:0006699	bile acid biosynthetic process	11/2886	38/18862	0.0235483	0.131995	0.10642	SLC27A2/FGFR4/ACOX2/OSBPL3/OSBPL7/NR1D1/NR1H4/SIRT1/HSD3B7/AMACR/OSBP	11
GO:0051154	negative regulation of striated muscle cell differentiation	11/2886	38/18862	0.0235483	0.131995	0.10642	MSX1/RGS2/EZH2/HDAC5/TMEM119/FRS2/BHLHE41/DKK1/BMP2/PAK1/SOX6	11
GO:0007292	female gamete generation	29/2886	131/18862	0.0235507	0.131995	0.10642	USP9X/ZFX/PAQR5/RGS2/MLH3/REC8/INHBA/TAF4B/BCL2/TOP2A/UBB/PTX3/TTK/RPS6/NPR2/ETV6/NANOS1/SIRT1/EREG/SIRT2/PLK1/PARN/CCNB1/MCM8/SRC/AURKA/ATM/PGR/FOSL1	29
GO:0045913	positive regulation of carbohydrate metabolic process	19/2886	78/18862	0.0240438	0.134055	0.108081	PPP1R3E/SLC45A3/ENTPD5/HIF1A/HRH1/PFKFB4/PTH1R/PTPN2/PMAIP1/PRKCE/GPD1/SORBS1/SIRT1/PFKFB3/GPT/NFKB1/AKT2/INSR/SRC	19
GO:0070373	negative regulation of ERK1 and ERK2 cascade	19/2886	78/18862	0.0240438	0.134055	0.108081	DUSP9/RPS6KA6/NDRG2/ATF3/DUSP10/DUSP1/SPRY4/ERRFI1/EPHB2/PTPN2/RANBP9/EMILIN1/SPRED2/CNKSR3/WNK2/KLF4/DUSP6/EIF3A/DUSP4	19
GO:0006338	chromatin remodeling	43/2886	209/18862	0.0241662	0.134055	0.108081	KDM6A/CHD8/HNRNPC/BAZ1B/CENPL/KDM5B/NRDE2/MIS18BP1/BAZ1A/NPM1/CHD5/ARID1A/MYSM1/CECR2/SMCHD1/DAXX/HMGA1/EZH1/HDAC5/TADA2A/CENPV/KDM6B/DNMT3A/CENPA/HDAC2/CENPW/HMGA2/PPHLN1/CHD4/SIRT1/SUV39H2/MYC/CHD7/CENPU/SIRT2/DNMT1/MPND/MPHOSPH8/ZNFX1/RSF1/PAK1/SPTY2D1/MTA2	43
GO:0010310	regulation of hydrogen peroxide metabolic process	7/2886	20/18862	0.0242002	0.134055	0.108081	COX2/HDAC6/CTNS/FYN/NOXA1/NOXO1/NNT	7
GO:0031293	membrane protein intracellular domain proteolysis	7/2886	20/18862	0.0242002	0.134055	0.108081	MBTPS2/SPPL2A/NCSTN/NGFR/NFKB1/SPPL2B/MBTPS1	7
GO:0035330	regulation of hippo signaling	7/2886	20/18862	0.0242002	0.134055	0.108081	MARK3/WWC1/VGLL4/LIMD1/NEK8/MAP2K3/SHANK2	7
GO:0046597	negative regulation of viral entry into host cell	7/2886	20/18862	0.0242002	0.134055	0.108081	TRIM10/TRIM26/TRIM25/PTX3/SNX3/TRIM5/IFITM1	7
GO:0046655	folic acid metabolic process	7/2886	20/18862	0.0242002	0.134055	0.108081	MTHFR/SLC46A1/SHMT1/MTHFD2/MTHFD1L/MTHFD2L/SLC19A1	7
GO:0046931	pore complex assembly	7/2886	20/18862	0.0242002	0.134055	0.108081	NUP205/CCT3/NUP153/GSDMD/CCT8/NUP98/PLEKHA7	7
GO:0060444	branching involved in mammary gland duct morphogenesis	7/2886	20/18862	0.0242002	0.134055	0.108081	KDM5B/WNT5A/EPHA2/CSF1/BTRC/SRC/PGR	7
GO:2000178	negative regulation of neural precursor cell proliferation	7/2886	20/18862	0.0242002	0.134055	0.108081	SLC16A2/BTG2/WNT5A/NR2E1/KDM2B/APPL2/SIRT2	7
GO:0007015	actin filament organization	82/2886	435/18862	0.0242597	0.134265	0.10825	BAIAP2L1/SLIT2/TJP1/ACTA1/ENAH/TGFB3/FERMT2/CFL2/PFN3/FCHSD1/RHOA/ZYX/CAPZA2/ESPN/ARHGEF10L/ASAP3/MARCKSL1/CDC42EP1/MICAL3/ARHGAP28/BCL2/NEDD9/TRIM27/FSCN2/BAIAP2/TCAP/CORO6/FLII/SERPINF2/PAK2/CLASP2/RHOB/CDC42EP3/PRKCE/SPTBN1/TMSB10/MARCKS/KANK1/TPM2/TSC1/HIP1R/TRPV4/GAS2L3/PAWR/AVIL/LIMA1/RND1/CUL3/VIL1/MYO1B/NEB/RND3/NRAP/ADD3/SORBS1/PDLIM1/RHOBTB1/MSRB2/BIN3/DMTN/DLC1/FHDC1/SHROOM3/SHANK1/VAS…	82
GO:0032872	regulation of stress-activated MAPK cascade	38/2886	181/18862	0.0243088	0.134416	0.108372	MID1/TGFB2/DUSP10/TRAF3/DACT1/DUSP1/WNT5A/ZC3H12A/GADD45A/WNT7B/PHLPP1/RIPK1/VEGFA/SPHK1/PER1/MINK1/SERPINF2/SH3RF3/SEMA4C/GRIK2/DNAJA1/AMBP/TRAF1/FOXM1/PDCD4/FAS/MYC/STK3/RIPK2/TLR3/EMC10/GADD45B/CYLD/MAPK8IP3/ZNF622/FOXO1/BMP2/PLCB1	38
GO:0031016	pancreas development	18/2886	73/18862	0.0245449	0.135479	0.109229	WNT5A/RHEB/SMO/IL6/CDH2/ONECUT2/CCDC40/HES1/CCDC39/EIF2AK3/ANXA1/HNF1A/TCF7L2/MSLN/FOXO1/HNF4A/ARNTL/PAX6	18
GO:0048644	muscle organ morphogenesis	18/2886	73/18862	0.0245449	0.135479	0.109229	DLL4/TNNT2/TGFB2/MYLK/WNT5A/FOXC1/TCAP/FZD2/NOG/ENG/LRP2/ANKRD1/BMPR1A/FOXH1/CHD7/ZFPM1/POU4F1/BMP2	18
GO:0043487	regulation of RNA stability	41/2886	198/18862	0.0246611	0.135878	0.109551	HNRNPC/RNASEL/DHX9/SAMD4A/PSME1/NPM1/PSMD6/PUM1/ZC3H12A/YBX1/CSDC2/EIF4ENIF1/HSPA1A/PSMD3/PSMC5/AXIN2/UBB/TNFSF13/FXR1/PSMD2/EIF4G1/PUM2/RPS27A/XPO1/UBC/GIGYF2/PSMD14/VIM/YWHAZ/PABPC1/EXOSC9/HNRNPD/ZFP36/UBA52/ELAVL1/PARN/E2F1/PSMA7/YTHDF1/HSPA8/PSMC3	41
GO:0001654	eye development	69/2886	359/18862	0.0247377	0.136178	0.109793	NHS/SALL2/ACHE/PDE6B/DLL4/BBS4/PBX1/KDM5B/ATP2B4/TGFB2/MAX/HIF1A/SH3PXD2B/CRYBG3/COL8A1/MYH15/IFT122/MITF/WNT5A/LAMB2/INHBA/EPHA2/EPHB2/MFSD2A/BCAR3/WNT2B/PYGO2/NES/WNT7B/ATF4/BCL2/FOXC1/VEGFA/FSCN2/JMJD6/CTNS/SKIL/SOX2/IFT172/EFEMP1/SPRED2/NR2E1/HDAC2/AHI1/AGTPBP1/SLC1A1/TOPORS/KLF4/SLC25A25/KDM2B/CEP290/FRS2/RARG/TULP3/OBSL1/VIM/CHD7/SLC7A11/PITX2/SIX5/MAF/RPGRIP1L/PKNOX1/TGIF2/XRN2/FZD4/TSKU/U…	69
GO:0002218	activation of innate immune response	32/2886	148/18862	0.0248759	0.136691	0.110207	MUC12/MUC17/HSP90AA1/PSME1/FBXW11/MATR3/RAF1/PSMD6/BCL10/MUC1/IFI16/XRCC6/TAB1/PSMD3/PSMC5/PAK2/PSMD2/FYN/XRCC5/PSMD14/BTRC/IKBKB/NFKB1/RELB/PSPC1/MAVS/SRC/PSMA7/PAK1/TRIM5/PSMC3/MUC6	32
GO:0021549	cerebellum development	22/2886	94/18862	0.0249472	0.136691	0.110207	COX1/CKB/EZH2/SMO/PTBP2/GBA/NCSTN/SSTR3/FOXC1/CDK5R1/SEZ6/SEMA4C/AGTPBP1/HSPA5/GLI1/GBX2/NANOS1/HNRNPD/RPGRIP1L/GART/FZD4/PAK1	22
GO:0098840	protein transport along microtubule	17/2886	68/18862	0.0249608	0.136691	0.110207	IFT122/TTC26/KIF17/RABL2B/IFT27/DYNLL2/IFT80/KIF3C/IFT172/SSNA1/TTC21B/BAG3/KIF5B/BBS12/CLUAP1/MAPK8IP3/KIF3B	17
GO:0099118	microtubule-based protein transport	17/2886	68/18862	0.0249608	0.136691	0.110207	IFT122/TTC26/KIF17/RABL2B/IFT27/DYNLL2/IFT80/KIF3C/IFT172/SSNA1/TTC21B/BAG3/KIF5B/BBS12/CLUAP1/MAPK8IP3/KIF3B	17
GO:0034440	lipid oxidation	25/2886	110/18862	0.025018	0.136691	0.110207	ABCD1/IVD/SLC27A2/ABCD4/PPARG/ACOX2/PRKAG2/CROT/MFSD2A/CPT2/HAO2/CPT1B/ECI2/ALDH3A2/ACAT2/NR4A3/ACADS/ACACB/APPL2/ADIPOR2/PHYH/PEX2/AKT2/ILVBL/AMACR	25
GO:0010586	miRNA metabolic process	9/2886	29/18862	0.0250599	0.136691	0.110207	AGO4/ZC3H12A/DGCR8/RAN/BCDIN3D/DIS3L2/AGO2/NFKB1/PARN	9
GO:0040018	positive regulation of multicellular organism growth	9/2886	29/18862	0.0250599	0.136691	0.110207	SMO/CSF1/BCL2/VIL1/GPAM/CHD7/SPTBN4/BBS2/GHR	9
GO:0050686	negative regulation of mRNA processing	9/2886	29/18862	0.0250599	0.136691	0.110207	HNRNPA2B1/C1QBP/SRSF7/HNRNPK/SFSWAP/PTBP1/RNPS1/DYRK1A/CTR9	9
GO:0070723	response to cholesterol	9/2886	29/18862	0.0250599	0.136691	0.110207	SMO/INHBA/PMVK/OSBPL7/PTCH1/ABCA2/HMGCS1/F7/GRAMD1B	9
GO:0043542	endothelial cell migration	55/2886	278/18862	0.0251002	0.136691	0.110207	SRPX2/NR2F2/SLIT2/THBS1/DLL4/DNAJA4/AGT/ATP2B4/VASH1/HIF1A/FGF18/SPARC/PLXND1/PPARG/ADAMTS9/WNT5A/RHOA/PAXIP1/PIK3CD/EPHA2/ZC3H12A/GADD45A/HMOX1/PATZ1/ADTRP/VEGFA/JUP/HDAC5/MAP2K3/RHOB/ATOH8/NR2E1/ANXA1/KLF4/SCARB1/P2RX4/NR4A1/SCG2/DPP4/SIRT1/FGFR1/LOXL2/EGR3/ANGPT2/VEGFC/FBXW7/ZNF580/EMC10/CALR/PLK2/EFNB2/RGCC/STARD13/ITGB2/ETS1	55
GO:0043090	amino acid import	13/2886	48/18862	0.0251183	0.136691	0.110207	SLC16A2/SLC7A8/RGS2/SFXN1/SLC6A6/SLC47A1/SLC25A38/SLC1A1/PER2/SFXN3/SLC7A11/SLC1A5/SLC3A2	13
GO:0051204	protein insertion into mitochondrial membrane	13/2886	48/18862	0.0251183	0.136691	0.110207	BMF/TP53BP2/HSP90AA1/HSPA4/TP73/PMAIP1/BCL2/TFDP2/BCL2L11/YWHAZ/BBC3/PDCD5/E2F1	13
GO:0061180	mammary gland epithelium development	16/2886	63/18862	0.0252646	0.137246	0.110654	MSX1/KDM5B/HIF1A/WNT5A/MST1/SMO/EPHA2/CSF1/PYGO2/WNT7B/WNT3/PTCH1/BTRC/AKT2/SRC/PGR	16
GO:1903317	regulation of protein maturation	16/2886	63/18862	0.0252646	0.137246	0.110654	MMP14/SERPINE1/ADAM8/THBS1/CHAC1/F12/TMEM59/SERPINF2/IL1R2/GAS1/LRRK2/LPCAT3/CARD8/HPN/RUNX1/SRC	16
GO:0042073	intraciliary transport	14/2886	53/18862	0.0253919	0.137568	0.110914	IFT122/TTC26/KIF17/RABL2B/IFT27/DYNLL2/IFT80/KIF3C/IFT172/SSNA1/TTC21B/BBS12/CLUAP1/KIF3B	14
GO:0031638	zymogen activation	15/2886	58/18862	0.0254226	0.137568	0.110914	MMP14/SERPINE1/THBS1/CTSH/F12/OMA1/IFI16/TBC1D10A/SERPINF2/C1RL/C1R/RIPK2/PRSS12/HPN/RUNX1	15
GO:0044380	protein localization to cytoskeleton	15/2886	58/18862	0.0254226	0.137568	0.110914	MID1/BBS4/CEP350/KLHL21/STIL/SPAG5/TTK/KIF20B/UBXN2B/PARD6A/CHAMP1/PIBF1/CEP250/AURKA/C2CD3	15
GO:0060964	regulation of gene silencing by miRNA	27/2886	121/18862	0.0255871	0.137568	0.110914	DHX9/PPARG/LIMD1/NUP205/IL6/PUM1/AGO1/ZC3H12A/TNRC6B/EIF4ENIF1/RIPK1/NUP153/DDX5/FXR1/EIF4G1/PUM2/RANBP2/ZC3H10/BCDIN3D/IPO8/EIF4E2/AGO2/ZFP36/ELAVL1/NUP155/NUP98/NUP160	27
GO:1904375	regulation of protein localization to cell periphery	27/2886	121/18862	0.0255871	0.137568	0.110914	IQSEC2/GRIPAP1/MMP14/CNPY4/CNST/ATP2B4/NUMB/SQSTM1/GNAI1/RSC1A1/EPHA2/EPHB2/TMEM59/ITGA3/LRRC15/PKDCC/PRKCE/SPTBN1/ABCA2/LRP1/VIL1/SORBS1/KIF5B/PLK1/DAB2/ZDHHC5/PPFIA1	27
GO:0045591	positive regulation of regulatory T cell differentiation	6/2886	16/18862	0.0257195	0.137568	0.110914	CD46/DUSP10/LGALS9/BCL6/SOCS1/SOX12	6
GO:0048385	regulation of retinoic acid receptor signaling pathway	6/2886	16/18862	0.0257195	0.137568	0.110914	EZH2/DHRS3/ZNF536/CALR/CNOT1/ASXL1	6
GO:0061081	positive regulation of myeloid leukocyte cytokine production involved in immune response	6/2886	16/18862	0.0257195	0.137568	0.110914	SEMA7A/WNT5A/BCL10/NR4A3/DDX21/MAVS	6
GO:0070365	hepatocyte differentiation	6/2886	16/18862	0.0257195	0.137568	0.110914	ANXA1/KRT18/FRZB/ITGA2/HNF4A/TAF10	6
GO:0090083	regulation of inclusion body assembly	6/2886	16/18862	0.0257195	0.137568	0.110914	DNAJA4/HSPA2/HSPA1A/HSPA1B/PSMC5/DNAJB1	6
GO:1901201	regulation of extracellular matrix assembly	6/2886	16/18862	0.0257195	0.137568	0.110914	AGT/CLASP2/EMILIN1/ANTXR1/RGCC/PHLDB1	6
GO:0032642	regulation of chemokine production	21/2886	89/18862	0.0257454	0.137568	0.110914	DDX3X/ARG2/HIF1A/EGR1/WNT5A/IL6/EPHA2/HMOX1/IL17RA/LGALS9/SOCS5/KLF4/TRIM32/NR1H4/LRP1/RIPK2/IL7/TLR3/ZFPM1/MAVS/SIGIRR	21
GO:0006983	ER overload response	5/2886	12/18862	0.0258661	0.137568	0.110914	PPP1R15B/EIF2AK3/BCL2L11/HSPA5/DDIT3	5
GO:0030202	heparin metabolic process	5/2886	12/18862	0.0258661	0.137568	0.110914	IDUA/GLCE/NDST1/XYLT2/NDST2	5
GO:0032352	positive regulation of hormone metabolic process	5/2886	12/18862	0.0258661	0.137568	0.110914	HIF1A/EGR1/PAX8/HPN/ADM	5
GO:0060394	negative regulation of pathway-restricted SMAD protein phosphorylation	5/2886	12/18862	0.0258661	0.137568	0.110914	SMAD6/NOG/EMILIN1/DKK1/PMEPA1	5
GO:0061469	regulation of type B pancreatic cell proliferation	5/2886	12/18862	0.0258661	0.137568	0.110914	ERRFI1/NR1D1/NR4A3/NR4A1/PTPRN	5
GO:0071679	commissural neuron axon guidance	5/2886	12/18862	0.0258661	0.137568	0.110914	SMO/EPHB2/VEGFA/PTCH1/ROBO3	5
GO:0090085	regulation of protein deubiquitination	5/2886	12/18862	0.0258661	0.137568	0.110914	ZC3H12A/SART3/TANK/OTUD4/UBXN1	5
GO:0140289	protein mono-ADP-ribosylation	5/2886	12/18862	0.0258661	0.137568	0.110914	PARP9/PARP14/TIPARP/PARP10/PARP4	5
GO:0051056	regulation of small GTPase mediated signal transduction	62/2886	319/18862	0.02589	0.137568	0.110914	STARD8/ARHGEF9/IQSEC2/SLIT2/ARAP2/ABL2/SRGAP2/TGFB2/OBSCN/SOS2/SQSTM1/ARHGAP26/SPRY4/ARHGAP31/IQSEC1/RAF1/RHOA/EPHB2/ARHGAP29/CSF1/NGF/ARHGEF11/RTN4R/LZTR1/ARHGAP28/TIMP2/GNA13/ITGA3/BCL6/RHOB/KANK1/RALGPS1/SRGAP1/RACGAP1/FOXM1/CUL3/SHOC2/PSD/GBF1/ARHGAP19/RHOBTB1/DENND3/DLC1/EPS8L1/ARHGAP33/SYDE1/KANK2/ARHGEF18/TRIP10/ARHGAP17/DEPDC1B/TRIO/MCF2L/STARD13/TIAM1/RALGAPA2/SRC/PREX1/STMN3/ARAP1/ARHGA…	62
GO:0032434	regulation of proteasomal ubiquitin-dependent protein catabolic process	29/2886	132/18862	0.0259026	0.137568	0.110914	UBQLN2/CSNK1A1/RYBP/RPL11/RNF19B/CDC20/PLK3/GBA/HSPA1A/HSPA1B/HSP90AB1/TRIB2/SOCS5/XPO1/UFL1/CHFR/LRRK2/WAC/TRIB1/EIF3H/SIRT2/KEAP1/PLK1/PLK2/CDC20B/DAB2/TRIB3/AURKA/UBXN1	29
GO:0090287	regulation of cellular response to growth factor stimulus	58/2886	296/18862	0.0261944	0.138999	0.112067	GPC3/SMURF1/MSX1/SLIT2/THBS1/CTDSPL2/SMAD6/AGT/ATP2B4/TGFB3/HIF1A/FGF18/SPRY4/LOX/NREP/PPARG/WNT5A/NBL1/ONECUT2/HSPA1A/HSP90AB1/ZNF451/CD109/NGFR/ITGA3/NOG/MTMR4/UBB/HES1/VEPH1/IL12A/SKIL/EMILIN1/RPS27A/SPRED2/HSPA5/ENG/UBC/CHST11/LEMD3/GPC1/LRP2/SIRT1/FGFR1/ING2/VEGFC/LTBP4/UBA52/TGFB1I1/VASN/FOXD1/PELO/DAB2/SHISA2/LATS2/SLC2A10/PMEPA1/FZD4	58
GO:0010950	positive regulation of endopeptidase activity	38/2886	182/18862	0.0263261	0.139458	0.112438	DDX3X/FIS1/CTSH/PSME1/PRR7/PPARG/CASP9/BCL10/NGF/IFI16/NCSTN/TBC1D10A/PMAIP1/RIPK1/TTBK1/NGFR/LGALS9/EIF2AK3/BCL2L11/FYN/SLC1A1/ACER2/ANP32B/TNFSF15/HIP1R/HSPD1/PSMD14/FAS/SIRT1/MYC/RIPK2/TNFRSF10B/DLC1/CARD8/BBC3/PDCD5/ADRM1/RPS3	38
GO:0043123	positive regulation of I-kappaB kinase/NF-kappaB signaling	38/2886	182/18862	0.0263261	0.139458	0.112438	TRIM52/RHOA/MIER1/BCL10/S100A13/LGALS1/HMOX1/VAPA/RIPK1/TRIM38/TRIM27/SECTM1/TMEM101/TRIM25/LGALS9/PRKCE/REL/PELI1/SLC20A1/FYN/GJA1/TRIM32/DDX21/EEF1D/MTDH/RIPK2/IKBKB/TNFRSF10B/TLR3/ALPK1/ANKRD17/CC2D1A/PLK2/MAVS/BIRC3/TRIM68/TRIM6/TRIM5	38
GO:0010822	positive regulation of mitochondrion organization	20/2886	84/18862	0.0265196	0.140003	0.112877	FIS1/BMF/TP53BP2/HIF1A/TP73/CHCHD10/PMAIP1/BCL2/MIEF2/TFDP2/BCL2L11/HIP1R/CAMKK2/ZDHHC6/PPIF/YWHAZ/BBC3/PLAUR/PDCD5/E2F1	20
GO:0042475	odontogenesis of dentin-containing tooth	20/2886	84/18862	0.0265196	0.140003	0.112877	FAM20C/SERPINE1/MSX1/SLC34A1/SMO/CSF1/FOXC1/NGFR/BCL2L11/HDAC2/ATF2/BMPR1A/CA2/ENAM/SMPD3/ROGDI/FOXO1/BMP2/RELT/ADM	20
GO:0007044	cell-substrate junction assembly	23/2886	100/18862	0.0269459	0.14189	0.114399	MMP14/TRIP6/THBS1/FERMT2/EFNA5/RHOA/MACF1/PIP5K1A/BCL2/VEGFA/DST/ITGB4/CLASP2/TSC1/LRP1/SORBS1/VCL/DMTN/DLC1/DAPK3/ITGA2/SRC/CD151	23
GO:1903076	regulation of protein localization to plasma membrane	23/2886	100/18862	0.0269459	0.14189	0.114399	GRIPAP1/MMP14/CNPY4/CNST/ATP2B4/NUMB/SQSTM1/RSC1A1/EPHA2/EPHB2/TMEM59/ITGA3/LRRC15/PKDCC/PRKCE/SPTBN1/LRP1/VIL1/SORBS1/KIF5B/DAB2/ZDHHC5/PPFIA1	23
GO:1905269	positive regulation of chromatin organization	23/2886	100/18862	0.0269459	0.14189	0.114399	WDR61/PAXIP1/KMT2E/TAL1/MIER1/MTF2/MUC1/VEGFA/KAT7/TADA2A/BCL6/PHF19/SART3/PPHLN1/LRRK2/SIRT1/ING2/PAF1/DNMT1/CCNB1/MPHOSPH8/ATM/CTR9	23
GO:0002183	cytoplasmic translational initiation	10/2886	34/18862	0.0270787	0.142106	0.114572	EIF5/EIF3D/EIF4A1/EIF4A2/EIF4G1/EIF4B/EIF3A/EIF3H/RPL13A/EIF3K	10
GO:0055081	anion homeostasis	10/2886	34/18862	0.0270787	0.142106	0.114572	SLC12A9/KCTD7/SLC12A6/SLC12A1/CKB/SLC34A1/FGFR4/SLC1A1/SLC7A11/SLC12A5	10
GO:0072006	nephron development	30/2886	138/18862	0.0271985	0.142613	0.114981	GPC3/AGT/PBX1/SIX4/EGR1/LAMB2/SMO/HEYL/WNT2B/WNT7B/BCL2/FOXC1/VEGFA/FOXJ1/ITGA3/NOG/HES1/PAX8/CD24/AHI1/PTCH1/MYC/ANGPT2/PKD1/FOXD1/GZF1/ASXL1/BMP2/LGR4/NUP160	30
GO:0032496	response to lipopolysaccharide	63/2886	326/18862	0.0277354	0.145059	0.116953	LDOC1/SERPINE1/SMAD6/FMO1/TNFSF4/DUSP10/BDKRB1/GCH1/NFKBIA/TRIM41/SPARC/IRAK2/WNT5A/RHOA/IL6/ALPL/ZC3H12A/JUN/PDE4B/BCL10/TNFRSF11A/NR1D1/HDAC5/LGALS9/SHPK/SRR/PRPF8/IL12A/PRKCE/PELI1/HDAC2/GJA1/TNFAIP3/ADAMTS13/SCARB1/NR1H4/ADIPOR2/PDCD4/NFKB2/ANKRD1/MRC1/VIM/TRIB1/MTDH/RIPK2/HMGB2/NFKB1/CARD8/AXL/ZFP36/PAF1/NFKBIB/JUND/IRF8/IFNAR1/GGT7/SRC/TRIM6/TRIM5/ADM/CTR9/NR1H3/SIGIRR	63
GO:0032602	chemokine production	22/2886	95/18862	0.0279199	0.145901	0.117632	DDX3X/TNFSF4/ARG2/HIF1A/EGR1/WNT5A/IL6/EPHA2/HMOX1/IL17RA/LGALS9/SOCS5/KLF4/TRIM32/NR1H4/LRP1/RIPK2/IL7/TLR3/ZFPM1/MAVS/SIGIRR	22
GO:0021884	forebrain neuron development	8/2886	25/18862	0.0282974	0.147004	0.118521	PLXNA3/SLIT2/ROBO2/WNT5A/UBB/SCYL2/GBX2/ATF5	8
GO:0032682	negative regulation of chemokine production	8/2886	25/18862	0.0282974	0.147004	0.118521	ARG2/IL6/EPHA2/LGALS9/SOCS5/KLF4/NR1H4/SIGIRR	8
GO:0060330	regulation of response to interferon-gamma	8/2886	25/18862	0.0282974	0.147004	0.118521	PARP9/PARP14/PPARG/PTPN2/HSP90AB1/CDC37/SOCS1/NR1H3	8
GO:0060334	regulation of interferon-gamma-mediated signaling pathway	8/2886	25/18862	0.0282974	0.147004	0.118521	PARP9/PARP14/PPARG/PTPN2/HSP90AB1/CDC37/SOCS1/NR1H3	8
GO:0060765	regulation of androgen receptor signaling pathway	8/2886	25/18862	0.0282974	0.147004	0.118521	HDAC6/HEYL/DDX5/SIRT1/FOXH1/DAB2/PRMT2/TRIM68	8
GO:0071425	hematopoietic stem cell proliferation	8/2886	25/18862	0.0282974	0.147004	0.118521	WNT5A/WNT2B/GBA/PIM1/KAT7/ETV6/ATXN1L/RUNX1	8
GO:0016572	histone phosphorylation	11/2886	39/18862	0.0283963	0.14727	0.118736	BAZ1B/VRK1/MST1/AURKB/HMGA2/MAP3K12/CDK1/CCNB1/AURKA/ATM/INCENP	11
GO:0060416	response to growth hormone	11/2886	39/18862	0.0283963	0.14727	0.118736	PHEX/CACYBP/SLC34A1/NME2/SOCS2/STAT6/IGFBP5/GDF15/GHR/PRLR/F7	11
GO:0060968	regulation of gene silencing	31/2886	144/18862	0.0284412	0.147379	0.118824	DHX9/PPARG/LIMD1/NUP205/IL6/PUM1/AGO1/ZC3H12A/MIER1/ADAR/TNRC6B/EIF4ENIF1/CDC45/RIPK1/NUP153/HMGA1/DDX5/FXR1/EIF4G1/PUM2/RANBP2/ZC3H10/BCDIN3D/IPO8/EIF4E2/AGO2/ZFP36/ELAVL1/NUP155/NUP98/NUP160	31
GO:0003143	embryonic heart tube morphogenesis	17/2886	69/18862	0.0285459	0.147674	0.119062	BBS4/HIF1A/WNT5A/SMO/STIL/CCDC40/CCDC103/HES1/CCDC39/IFT172/AHI1/ENG/TBR1/SUFU/FOXH1/MEGF8/C2CD3	17
GO:0021675	nerve development	17/2886	69/18862	0.0285459	0.147674	0.119062	PLXNA3/SIX4/LRIG1/HOXA3/EPHB2/NGF/CHRNB2/ATP8B1/NGFR/HES1/ERBB3/ITGA4/HOXD3/EGR2/CHD7/PRKCG/POU4F1	17
GO:0009062	fatty acid catabolic process	24/2886	106/18862	0.0288603	0.149051	0.120172	ABCD1/IVD/SLC27A2/ABCD4/ACOX2/CROT/MFSD2A/CPT2/HAO2/CPT1B/ECI2/ADTRP/ALDH3A2/ACAT2/SLC27A4/CEL/ACADS/ACACB/PHYH/PEX2/AKT2/ILVBL/AMACR/LPIN3	24
GO:0048704	embryonic skeletal system morphogenesis	21/2886	90/18862	0.028891	0.149085	0.120199	MMP14/TGFB3/SIX4/NDST1/HYAL1/SETD2/HOXA2/HOXA3/EIF4A3/HOXB9/HOXB5/NOG/MTHFD1L/CHST11/ALX1/HOXC4/TULP3/HOXD3/HOXD4/MEGF8/GNAS	21
GO:0006323	DNA packaging	48/2886	240/18862	0.028979	0.14929	0.120365	TSPYL2/NCAPG/CDAN1/CENPL/NRDE2/MIS18BP1/NPM1/NCAPG2/CHD5/PHF13/SMCHD1/BRD2/DAXX/HMGA1/TOP2A/EZH1/CENPV/SMC4/DNMT3A/CENPA/NCAPH/TSPYL1/CENPW/SHPRH/ANP32B/SART3/NAP1L1/HMGA2/PPHLN1/HAT1/SIRT1/PARP10/KAT6A/CENPU/HMGB2/LIN54/PAF1/SIRT2/DNMT1/CHAF1A/CCNB1/MPHOSPH8/CHAF1B/ZNFX1/RSF1/SPTY2D1/INCENP/CDCA5	48
GO:0003281	ventricular septum development	16/2886	64/18862	0.02905	0.149531	0.120559	SLIT2/SMAD6/TGFB2/MATR3/ROBO2/WNT5A/HEYL/RBM15/FZD2/NOG/HES1/FRS2/LRP2/SUFU/HEY1/ZFPM1	16
GO:0007339	binding of sperm to zona pellucida	12/2886	44/18862	0.0291765	0.14956	0.120582	OVGP1/ADAM30/CCT3/HSPA1L/CCT4/CCT7/TCP1/CCT2/ADAM32/PCSK4/CCT5/CCT8	12
GO:0010824	regulation of centrosome duplication	12/2886	44/18862	0.0291765	0.14956	0.120582	NPM1/SPICE1/STIL/CEP76/PKHD1/SIRT1/TMEM67/PLK4/CHMP2A/PLK2/CHORDC1/NAT10	12
GO:0042771	intrinsic apoptotic signaling pathway in response to DNA damage by p53 class mediator	12/2886	44/18862	0.0291765	0.14956	0.120582	AEN/TP73/MUC1/IFI16/BCL2/RPL26/HNRNPK/TOPORS/SIRT1/DDIT4/ING2/BCL3	12
GO:0060976	coronary vasculature development	12/2886	44/18862	0.0291765	0.14956	0.120582	GPC3/SMAD6/NDST1/PLXND1/SETD2/TAB1/ZBTB14/VEGFA/LRP2/SUFU/MEGF8/APLNR	12
GO:0007254	JNK cascade	39/2886	189/18862	0.0292992	0.150009	0.120944	DUSP9/DUSP10/TRAF3/DACT1/CASR/IRAK2/WNT5A/MAP3K6/GADD45A/WNT7B/TAB1/PHLPP1/RIPK1/DAXX/UBB/PER1/MINK1/SERPINF2/RPS27A/SH3RF3/GRIK2/ROR2/DNAJA1/AMBP/TRAF1/UBC/MAP3K12/STRADB/PDCD4/TRIB1/STK3/RIPK2/TLR3/UBA52/GADD45B/CYLD/MAPK8IP3/ZNF622/PLCB1	39
GO:0006888	endoplasmic reticulum to Golgi vesicle-mediated transport	42/2886	206/18862	0.0293822	0.150009	0.120944	COG2/SEC16B/DYNC1H1/SERPINA1/YIPF5/PROS1/TMEM115/SEC22C/INSIG1/CAPZA2/MPPE1/VAPA/TRAPPC8/GOSR2/DYNLL2/ANKRD28/SPTBN1/GAS1/STX17/PPP6C/LRRK2/CUL3/SEC23IP/GBF1/ANK3/SEC24C/NRBP2/SEC24D/ANK2/AREG/SPTBN4/COG8/COG4/GAS6/PROZ/F10/F7/COG3/SEC23B/CTSC/PPP6R3/BET1L	42
GO:0030239	myofibril assembly	15/2886	59/18862	0.0294165	0.150009	0.120944	MEF2A/ACTA1/TNNT2/OBSCN/SIX4/CFL2/TCAP/KRT19/FLII/KRT8/OBSL1/NEB/NRAP/ANKRD1/LDB3	15
GO:0046324	regulation of glucose import	15/2886	59/18862	0.0294165	0.150009	0.120944	GPC3/MEF2A/RNASEL/PRKAG2/PEA15/SLC25A27/APPL2/CREBL2/ADIPOR2/CAPN10/SORBS1/RTN2/AKT2/INSR/OCLN	15
GO:0090303	positive regulation of wound healing	15/2886	59/18862	0.0294165	0.150009	0.120944	SERPINE1/CLDN4/THBS1/FERMT2/F12/HBEGF/MYLK/ENPP4/SERPINF2/PRKCE/ANXA1/KANK1/DMTN/OCLN/F7	15
GO:0042304	regulation of fatty acid biosynthetic process	14/2886	54/18862	0.0296009	0.150611	0.12143	ABCD1/MID1IP1/SLC45A3/INSIG1/PRKAG2/WDTC1/ANXA1/ADIPOR2/SIRT1/FABP5/PIBF1/TRIB3/APOA4/NR1H3	14
GO:0072698	protein localization to microtubule cytoskeleton	14/2886	54/18862	0.0296009	0.150611	0.12143	MID1/BBS4/CEP350/STIL/SPAG5/TTK/KIF20B/UBXN2B/PARD6A/CHAMP1/PIBF1/CEP250/AURKA/C2CD3	14
GO:0031333	negative regulation of protein-containing complex assembly	30/2886	139/18862	0.0297655	0.151324	0.122005	HDAC6/DDX3X/SLIT2/SMAD6/DACT1/RAF1/CAPZA2/GBA/INPP5J/RIOK3/FLII/SPTBN1/TMSB10/KANK1/HSPA5/ULK1/HIP1R/AVIL/FKBP4/VIL1/ADD3/DKK1/DMTN/RPL13A/SPTBN4/SIRT2/DYRK1A/SRC/PMEPA1/SSH3	30
GO:0048041	focal adhesion assembly	20/2886	85/18862	0.0298492	0.151501	0.122147	MMP14/TRIP6/THBS1/FERMT2/EFNA5/RHOA/MACF1/PIP5K1A/BCL2/VEGFA/CLASP2/TSC1/LRP1/SORBS1/VCL/DMTN/DLC1/DAPK3/ITGA2/SRC	20
GO:0022037	metencephalon development	23/2886	101/18862	0.0299989	0.151762	0.122357	COX1/CKB/EZH2/SMO/PTBP2/GBA/NCSTN/SSTR3/BCL2/FOXC1/CDK5R1/SEZ6/SEMA4C/AGTPBP1/HSPA5/GLI1/GBX2/NANOS1/HNRNPD/RPGRIP1L/GART/FZD4/PAK1	23
GO:0034340	response to type I interferon	23/2886	101/18862	0.0299989	0.151762	0.122357	ISG20/TRIM56/RNASEL/EGR1/IRF1/WNT5A/IP6K2/SETD2/ISG15/ADAR/PTPN2/HSP90AB1/OASL/OAS3/STAT2/IFIT3/ABCE1/CDC37/IRF8/IFNAR1/MAVS/TRIM6/IFITM1	23
GO:0045621	positive regulation of lymphocyte differentiation	23/2886	101/18862	0.0299989	0.151762	0.122357	MMP14/PNP/ADAM8/TNFSF4/CD46/HLX/DUSP10/XRCC6/CD83/LGALS9/BCL6/SOCS5/ANXA1/INPP5D/RIPK2/IL7/EGR3/AXL/NFKBID/SOCS1/GAS6/RUNX1/SOX12	23
GO:1901215	negative regulation of neuron death	40/2886	195/18862	0.0300913	0.151981	0.122534	PARP2/ADAM8/BTG2/TGFB3/HIF1A/SIX4/CPEB4/ATP13A2/CSF1/NGF/GBA/NES/ATF4/HMOX1/BCL2/HSP90AB1/EIF4G1/REL/GRIK2/FYN/CNTFR/NR4A3/TSC1/KDM2B/LRP1/ERBB3/MAP3K12/LRRK2/NR4A2/INPP5A/SIRT1/NRBP2/SLC7A11/PRKCG/AXL/POU4F1/SOD1/SLC23A2/BTBD10/CLCF1	40
GO:1901888	regulation of cell junction assembly	40/2886	195/18862	0.0300913	0.151981	0.122534	SRPX2/MMP14/TJP1/THBS1/AGT/FLRT2/SIX4/FERMT2/EFNA5/ROBO2/SETD5/WNT5A/RHOA/AGRN/EPHA2/EPHB2/MACF1/CLDN19/CHRNB2/VEGFA/IL1RAP/CLASP2/NLGN1/EIF4G1/GJA1/TPBG/TSC1/LRP1/CLSTN3/VCL/IKBKB/DMTN/DLC1/LRFN3/CRB3/DAPK3/OCLN/SLITRK5/RUNX1/SRC	40
GO:0021782	glial cell development	25/2886	112/18862	0.0306893	0.154585	0.124633	HDAC11/LAMB2/SMO/IL6/MXRA8/NCSTN/TTBK1/NR1D1/CNTNAP1/ITGB4/ASPA/EIF2B5/ROR2/ABCA2/EIF2B1/LRP1/PARD3/VIM/NDRG1/AKT2/SIRT2/LDLR/BACE2/SOD1/MYRF	25
GO:0070302	regulation of stress-activated protein kinase signaling cascade	38/2886	184/18862	0.0307519	0.154585	0.124633	MID1/TGFB2/DUSP10/TRAF3/DACT1/DUSP1/WNT5A/ZC3H12A/GADD45A/WNT7B/PHLPP1/RIPK1/VEGFA/SPHK1/PER1/MINK1/SERPINF2/SH3RF3/SEMA4C/GRIK2/DNAJA1/AMBP/TRAF1/FOXM1/PDCD4/FAS/MYC/STK3/RIPK2/TLR3/EMC10/GADD45B/CYLD/MAPK8IP3/ZNF622/FOXO1/BMP2/PLCB1	38
GO:0010970	transport along microtubule	33/2886	156/18862	0.0307698	0.154585	0.124633	KIF4A/ARL8A/DYNC1H1/HIF1A/FBXW11/IFT122/FYCO1/TTC26/PEX14/KIF17/RABL2B/IFT27/BLOC1S5/DST/DYNLL2/UBB/KIF1C/IFT80/KIF3C/IFT172/SSNA1/TTC21B/BAG3/KIF5B/SYBU/BBS12/KLC3/CLUAP1/MAPK8IP3/MAP1B/SOD1/KIF3B/HSPA8	33
GO:0030856	regulation of epithelial cell differentiation	33/2886	156/18862	0.0307698	0.154585	0.124633	SERPINE1/SGPP1/EZH2/SMO/ERRFI1/MYCL/MAFF/FOXC1/VEGFA/CD109/MAFG/FOXJ1/NME2/HES1/GRHL1/SPRED2/ATOH8/PAX8/CD24/AHI1/PTCH1/ZDHHC21/VDR/APOLD1/FOXJ2/FRZB/VCL/ZEB1/IKBKB/ZFP36/KEAP1/RUNX1/PLCB1	33
GO:2000106	regulation of leukocyte apoptotic process	19/2886	80/18862	0.0307819	0.154585	0.124633	ADAM8/ARG2/HIF1A/FNIP1/WNT5A/PIK3CD/BCL10/LGALS9/AURKB/BCL6/TCP1/ANXA1/DOCK8/SLC39A10/GPAM/SIRT1/SLC7A11/AXL/GAS6	19
GO:0071295	cellular response to vitamin	9/2886	30/18862	0.0310775	0.155187	0.125119	PHEX/CASR/PPARG/TRIM24/PIM1/BRIP1/VDR/KANK2/GAS6	9
GO:0099068	postsynapse assembly	9/2886	30/18862	0.0310775	0.155187	0.125119	WNT5A/EPHB2/CDH2/IL1RAP/NLGN1/CEL/SHANK1/NRXN2/SHANK2	9
GO:0110110	positive regulation of animal organ morphogenesis	9/2886	30/18862	0.0310775	0.155187	0.125119	SIX4/ROBO2/WNT5A/CSF1/WNT2B/NGFR/FRS2/DKK1/BMP2	9
GO:1902230	negative regulation of intrinsic apoptotic signaling pathway in response to DNA damage	9/2886	30/18862	0.0310775	0.155187	0.125119	MUC1/BCL2/TRIM32/SIRT1/ING2/TMEM161A/CDKN2D/TPT1/USP47	9
GO:0043255	regulation of carbohydrate biosynthetic process	22/2886	96/18862	0.0311538	0.155442	0.125324	PPP1R3E/DGKQ/HRH1/MST1/PTH1R/SLC35B4/LEPR/PTPN2/PDK2/PPP1CB/RANBP2/CRY1/SORBS1/PPP1R3C/SIRT1/GPT/NFKB1/AKT2/INSR/SMPD3/NLN/SIK1	22
GO:0010801	negative regulation of peptidyl-threonine phosphorylation	7/2886	21/18862	0.0316281	0.157048	0.126619	DGKQ/EIF4G1/SPRED2/DDIT4/PARD3/DMTN/SIRT2	7
GO:0010866	regulation of triglyceride biosynthetic process	7/2886	21/18862	0.0316281	0.157048	0.126619	MFSD2A/SCARB1/FBXW7/LDLR/C3/SIK1/NR1H3	7
GO:0036303	lymph vessel morphogenesis	7/2886	21/18862	0.0316281	0.157048	0.126619	PTPN14/VASH1/EPHA2/FOXC1/VEGFA/VEGFC/PKD1	7
GO:0043555	regulation of translation in response to stress	7/2886	21/18862	0.0316281	0.157048	0.126619	DDX3X/PPP1R15B/EIF2S1/NPM1/ATF4/EIF4G1/EIF2AK3	7
GO:0046514	ceramide catabolic process	7/2886	21/18862	0.0316281	0.157048	0.126619	GLA/GALC/GBA/NAGA/ACER2/CEL/ASAH1	7
GO:0009064	glutamine family amino acid metabolic process	18/2886	75/18862	0.0316727	0.157143	0.126696	SLC7A7/ATP2B4/ARG2/NIT2/ASNS/AGMAT/ALDH4A1/CTPS1/DDAH1/ALDH5A1/GMPS/NR1H4/GLS2/AADAT/SLC7A11/SLC39A8/PRODH2/FTCD	18
GO:0042119	neutrophil activation	92/2886	500/18862	0.0317126	0.157215	0.126754	GLA/CFP/DDX3X/PNP/ANPEP/PGM2/ADAM8/SLC27A2/PKM/CTSH/CREG1/PRDX6/ARL8A/TMEM63A/HSP90AA1/DYNC1H1/SERPINA1/STK10/NIT2/PSMD6/RHOA/NBEAL2/MGAM/KMT2E/UBR4/FUCA1/LRRC7/ILF2/NCSTN/HSPA6/ARSA/XRCC6/SYNGR1/VAPA/TUBB/HSPA1A/HSPA1B/HSP90AB1/ENPP4/EEF1A1/GAA/TIMP2/PSMD3/JUP/ACLY/GHDC/CD300A/TMC6/NME2/GYG1/PTX3/PLD1/PSMD2/IL18RAP/HEBP2/LCN2/AGPAT2/CEP290/CCT2/LYZ/PA2G4/METTL7A/STK11IP/XRCC5/IDH1/PSMD14/VCL/GSD…	92
GO:0002237	response to molecule of bacterial origin	66/2886	346/18862	0.0318298	0.15767	0.12712	LDOC1/SERPINE1/SMAD6/FMO1/TNFSF4/DUSP10/BDKRB1/GCH1/NFKBIA/TRIM41/SPARC/IRAK2/WNT5A/RHOA/IL6/ALPL/ZC3H12A/JUN/PDE4B/BCL10/TNFRSF11A/NR1D1/HDAC5/LGALS9/SHPK/SRR/PRPF8/IL12A/PRKCE/PELI1/CD24/HDAC2/GJA1/TNFAIP3/ADAMTS13/SCARB1/NR1H4/ADIPOR2/PDCD4/NFKB2/ANKRD1/MRC1/VIM/TRIB1/MTDH/RIPK2/HMGB2/NFKB1/SSC5D/CARD8/AXL/ZFP36/PAF1/NFKBIB/SIRT2/JUND/IRF8/IFNAR1/GGT7/SRC/TRIM6/TRIM5/ADM/CTR9/NR1H3/SIGIRR	66
GO:0001578	microtubule bundle formation	24/2886	107/18862	0.0319811	0.157913	0.127317	PRC1/TTLL3/ZMYND10/TTC26/LRGUK/CCDC40/DNAH17/TTLL6/CCDC103/FOXJ1/IQCG/CCDC39/DRC1/ARMC2/CLIP1/DNAH7/BBS2/PLK1/MAP1B/SPEF2/DNAH5/SPEF1/TTC12/DNAJB13	24
GO:0006024	glycosaminoglycan biosynthetic process	24/2886	107/18862	0.0319811	0.157913	0.127317	GPC3/HS6ST2/GLCE/CEMIP/NDST1/HYAL1/CHPF2/AGRN/BCAN/XYLT2/HS3ST3B1/HS3ST3A1/PXYLP1/B3GNT2/HS3ST5/DSE/CHST11/GPC1/B3GNT7/CHPF/NDST2/NFKB1/SMPD3/VCAN	24
GO:0000083	regulation of transcription involved in G1/S transition of mitotic cell cycle	10/2886	35/18862	0.0328679	0.161006	0.12981	CDK16/CDK14/ORC1/CDC45/CDC6/TFDP2/KLF11/CDK17/CCNE1/E2F1	10
GO:0001825	blastocyst formation	10/2886	35/18862	0.0328679	0.161006	0.12981	BYSL/SUPT6H/SKIL/PNLDC1/CUL3/PTPN18/JUNB/CNOT1/CTR9/WDR74	10
GO:0002755	MyD88-dependent toll-like receptor signaling pathway	10/2886	35/18862	0.0328679	0.161006	0.12981	TLR5/IRF1/IRAK2/TAB1/CD300A/UBB/RPS27A/UBC/HSPD1/UBA52	10
GO:0033144	negative regulation of intracellular steroid hormone receptor signaling pathway	10/2886	35/18862	0.0328679	0.161006	0.12981	HEYL/PER1/CRY1/SIRT1/FOXH1/CALR/KANK2/CNOT1/DAB2/ARNTL	10
GO:0043243	positive regulation of protein-containing complex disassembly	10/2886	35/18862	0.0328679	0.161006	0.12981	CFL2/ADRB2/FYCO1/GBA/NES/EIF5A/TRPV4/VIL1/INSR/UVRAG	10
GO:1901030	positive regulation of mitochondrial outer membrane permeabilization involved in apoptotic signaling pathway	10/2886	35/18862	0.0328679	0.161006	0.12981	TP53BP2/TP73/CHCHD10/PMAIP1/BCL2/TFDP2/HIP1R/YWHAZ/BBC3/E2F1	10
GO:1905508	protein localization to microtubule organizing center	10/2886	35/18862	0.0328679	0.161006	0.12981	BBS4/CEP350/STIL/SPAG5/UBXN2B/PARD6A/PIBF1/CEP250/AURKA/C2CD3	10
GO:0018394	peptidyl-lysine acetylation	35/2886	168/18862	0.0328966	0.161019	0.129821	EID1/TAF5L/MBIP/BAZ1A/JADE2/BRPF1/SETD5/PAXIP1/CHD5/PYGO2/MUC1/ATAT1/BRPF3/ZNF451/KANSL1/KAT7/TADA2A/USP22/PER1/HDAC2/GTF3C4/DIP2B/KANSL2/ING4/ATF2/HAT1/IWS1/TAF5/SIRT1/EPC1/KAT6A/JADE1/DIP2A/PHF20/TAF10	35
GO:0035773	insulin secretion involved in cellular response to glucose stimulus	16/2886	65/18862	0.0332392	0.162567	0.131069	CDK16/HIF1A/EFNA5/RAF1/PIM3/NR1D1/STXBP4/PRKCE/HMGN3/NR1H4/LRP1/PTPRN/KIF5B/TRPM4/OXCT1/TIAM1	16
GO:0043966	histone H3 acetylation	15/2886	60/18862	0.0338534	0.164467	0.132601	TAF5L/MBIP/JADE2/BRPF1/BRPF3/ZNF451/KAT7/TADA2A/PER1/ING4/TAF5/SIRT1/KAT6A/JADE1/TAF10	15
GO:0061098	positive regulation of protein tyrosine kinase activity	15/2886	60/18862	0.0338534	0.164467	0.132601	AGT/ADORA1/HBEGF/NCAPG2/TAL1/NEDD9/PAK2/CD24/FYN/ERBB3/FBXW7/AREG/EREG/GAS6/SRC	15
GO:0010721	negative regulation of cell development	36/2886	174/18862	0.0338876	0.164467	0.132601	PLXNA3/SEMA4B/SEMA7A/DUSP10/SPRY4/EFNA5/WNT5A/SEMA3B/RHOA/SEMA3C/IL6/EPHB2/SEMA6C/RTN4R/KIAA0319/VEGFA/NGFR/NR1D1/WNT3/NOG/CDK5R1/HES1/SEMA4C/NR2E1/KANK1/NPR2/RNF10/APPL2/DIP2B/FRZB/BMPR1A/DMTN/FBXW7/SIRT2/LDLR/PAX6	36
GO:0033209	tumor necrosis factor-mediated signaling pathway	36/2886	174/18862	0.0338876	0.164467	0.132601	SPPL2A/TNFSF4/TRAF3/NFKBIA/PSME1/PSMD6/PTPN2/TNFRSF11A/RIPK1/HSPA1A/HSPA1B/CARD14/PSMD3/PSMC5/SPHK1/TNFSF13/PSMD2/FOXO3/TNFAIP3/TNFSF15/TRIM32/TRAF1/NR1H4/KRT18/KRT8/PSMD14/FAS/IKBKB/CARD8/SPPL2B/CYLD/GAS6/SPATA2/PSMA7/BIRC3/PSMC3	36
GO:0006270	DNA replication initiation	11/2886	40/18862	0.0339202	0.164467	0.132601	MCM7/ORC1/CDC45/PRIM2/CDC6/KAT7/MCM10/MCM4/CCNE1/WDR18/POLA2	11
GO:0035735	intraciliary transport involved in cilium assembly	11/2886	40/18862	0.0339202	0.164467	0.132601	IFT122/TTC26/KIF17/IFT27/DYNLL2/IFT80/KIF3C/IFT172/TTC21B/CLUAP1/KIF3B	11
GO:0071526	semaphorin-plexin signaling pathway	11/2886	40/18862	0.0339202	0.164467	0.132601	PLXNA3/PLXNB3/SEMA4B/SEMA7A/PLXNA1/PLXND1/SEMA3B/PLXNB1/SEMA3C/SEMA6C/SEMA4C	11
GO:0043280	positive regulation of cysteine-type endopeptidase activity involved in apoptotic process	29/2886	135/18862	0.034057	0.165	0.133031	DDX3X/FIS1/CTSH/PRR7/PPARG/CASP9/BCL10/NGF/PMAIP1/RIPK1/NGFR/LGALS9/EIF2AK3/BCL2L11/SLC1A1/ACER2/ANP32B/TNFSF15/HIP1R/HSPD1/FAS/SIRT1/MYC/TNFRSF10B/DLC1/CARD8/BBC3/PDCD5/RPS3	29
GO:0045620	negative regulation of lymphocyte differentiation	14/2886	55/18862	0.0342979	0.165912	0.133766	TNFSF4/HLX/IRF1/INHBA/ZC3H12A/PTPN2/ERBB2/FOXJ1/BCL6/SOCS5/ANXA1/NRARP/SOCS1/RUNX1	14
GO:0021545	cranial nerve development	12/2886	45/18862	0.0344224	0.165912	0.133766	PLXNA3/SIX4/HOXA3/EPHB2/CHRNB2/ATP8B1/HES1/ERBB3/HOXD3/EGR2/CHD7/POU4F1	12
GO:0032007	negative regulation of TOR signaling	12/2886	45/18862	0.0344224	0.165912	0.133766	UBR1/HIF1A/FNIP1/TMEM127/TSC1/ITFG2/SH3BP4/SIRT1/DDIT4/DEPTOR/ATM/ARNTL	12
GO:0033047	regulation of mitotic sister chromatid segregation	12/2886	45/18862	0.0344224	0.165912	0.133766	CENPF/DUSP1/CDC20/KLHL22/AURKB/BUB1/TTK/KNTC1/RAD21/PLK1/CCNB1/ATM	12
GO:0042551	neuron maturation	12/2886	45/18862	0.0344224	0.165912	0.133766	AGRN/BCL2/SCARF1/NTN4/RND1/LRRK2/NR4A2/KCNIP2/SCLT1/SPTBN4/C3/CLN5	12
GO:0098534	centriole assembly	12/2886	45/18862	0.0344224	0.165912	0.133766	NPM1/SPICE1/STIL/CEP76/RTTN/CCDC57/PLK4/CEP135/CHMP2A/CCDC61/PLK2/C2CD3	12
GO:0008206	bile acid metabolic process	13/2886	50/18862	0.0345136	0.165912	0.133766	SLC27A2/FGFR4/ACOX2/OSBPL3/NPC1/ATP8B1/OSBPL7/NR1D1/NR1H4/SIRT1/HSD3B7/AMACR/OSBP	13
GO:0046460	neutral lipid biosynthetic process	13/2886	50/18862	0.0345136	0.165912	0.133766	ACSL4/GK/MFSD2A/SCARB1/AVIL/GPAM/ACSL1/FBXW7/LDLR/C3/SIK1/LPIN3/NR1H3	13
GO:0046463	acylglycerol biosynthetic process	13/2886	50/18862	0.0345136	0.165912	0.133766	ACSL4/GK/MFSD2A/SCARB1/AVIL/GPAM/ACSL1/FBXW7/LDLR/C3/SIK1/LPIN3/NR1H3	13
GO:0043242	negative regulation of protein-containing complex disassembly	19/2886	81/18862	0.0346365	0.166034	0.133864	HDAC6/MID1IP1/CAMSAP2/CAPZA2/FLII/CLASP2/SPTBN1/NAV3/AVIL/LIMA1/VIL1/ADD3/DMTN/SPTBN4/APC2/MAP1B/SCAF4/TPX2/SPEF1	19
GO:0003184	pulmonary valve morphogenesis	6/2886	17/18862	0.0347269	0.166034	0.133864	SLIT2/SMAD6/TGFB2/ROBO2/HEYL/HEY1	6
GO:0042474	middle ear morphogenesis	6/2886	17/18862	0.0347269	0.166034	0.133864	MSX1/INSIG1/HOXA2/TSHZ1/RPL38/NOG	6
GO:0070734	histone H3-K27 methylation	6/2886	17/18862	0.0347269	0.166034	0.133864	EZH2/CHD5/MTF2/EZH1/SUPT6H/PHF19	6
GO:1900151	regulation of nuclear-transcribed mRNA catabolic process, deadenylation-dependent decay	6/2886	17/18862	0.0347269	0.166034	0.133864	TNRC6B/NANOS1/AGO2/PABPC1/ZFP36/CNOT1	6
GO:1902165	regulation of intrinsic apoptotic signaling pathway in response to DNA damage by p53 class mediator	6/2886	17/18862	0.0347269	0.166034	0.133864	MUC1/BCL2/RPL26/HNRNPK/SIRT1/ING2	6
GO:0031056	regulation of histone modification	30/2886	141/18862	0.0354528	0.169054	0.136299	EID1/WDR61/SETD5/PAXIP1/KMT2E/MTHFR/MTF2/PYGO2/MUC1/VEGFA/ZNF451/MLLT6/KAT7/TADA2A/SUPT6H/BCL6/PHF19/SART3/LRRK2/TRIP12/IWS1/SIRT1/UBR5/ING2/ZNF274/PAF1/DNMT1/CCNB1/ATM/CTR9	30
GO:0001945	lymph vessel development	8/2886	26/18862	0.03555	0.169054	0.136299	NR2F2/PTPN14/VASH1/EPHA2/FOXC1/VEGFA/VEGFC/PKD1	8
GO:0021952	central nervous system projection neuron axonogenesis	8/2886	26/18862	0.03555	0.169054	0.136299	SLIT2/NIN/EPHB2/CHRNB2/NR2E1/NR4A2/SPTBN4/TSKU	8
GO:0046639	negative regulation of alpha-beta T cell differentiation	8/2886	26/18862	0.03555	0.169054	0.136299	TNFSF4/HLX/ZC3H12A/BCL6/SOCS5/ANXA1/SOCS1/RUNX1	8
GO:0050926	regulation of positive chemotaxis	8/2886	26/18862	0.03555	0.169054	0.136299	CASR/ARTN/VEGFA/SCG2/ANGPT2/VEGFC/ITGA2/F7	8
GO:1900739	regulation of protein insertion into mitochondrial membrane involved in apoptotic signaling pathway	8/2886	26/18862	0.03555	0.169054	0.136299	TP53BP2/TP73/PMAIP1/BCL2/TFDP2/YWHAZ/BBC3/E2F1	8
GO:1900740	positive regulation of protein insertion into mitochondrial membrane involved in apoptotic signaling pathway	8/2886	26/18862	0.03555	0.169054	0.136299	TP53BP2/TP73/PMAIP1/BCL2/TFDP2/YWHAZ/BBC3/E2F1	8
GO:0006354	DNA-templated transcription, elongation	26/2886	119/18862	0.0356577	0.169436	0.136607	NELFA/WDR61/AFF4/SETD5/SETD2/EZH2/GTF2H4/DDX39B/ALYREF/RECQL5/KAT7/SUPT6H/WDR43/IWS1/PAF1/ELL/TAF1C/ELL2/CDK7/POU4F1/HMGN1/ADRM1/TAF1D/CTR9/GTF2H1/SSRP1	26
GO:0001819	positive regulation of cytokine production	81/2886	437/18862	0.0357861	0.169895	0.136977	DDX3X/SERPINE1/ADAM8/THBS1/SEMA7A/AGT/TNFSF4/DHX9/CD46/TLR5/HSP90AA1/HIF1A/EGR1/IRF1/WNT5A/SETD2/HILPDA/IL6/PDE4B/IL12RB2/BCL10/CD160/POLR3C/IFI16/MAPK11/XRCC6/ATF4/HMOX1/IL17RA/RIOK3/RIPK1/CD83/HSPA1A/HSPA1B/SPHK1/LGALS9/SERPINF2/IL1RAP/IL12A/SPTBN1/PELI1/EIF2AK3/HDAC2/ANXA1/NR4A3/TRIM32/AGPAT2/DDIT3/LRP1/STAT6/GAPDH/XRCC5/HSPD1/ATF2/NFKB2/DDX21/HK1/GSDMD/RIPK2/IL7/TLR3/HMGB2/NFKB1/EREG/ZNF580/C…	81
GO:0006352	DNA-templated transcription, initiation	49/2886	249/18862	0.0358092	0.169895	0.136977	ESRRG/BRF1/ESR2/NR3C1/NR2C2/PPARG/MITF/PAXIP1/JUN/TAF4B/E2F3/GTF2H4/TEAD3/MED20/ZNF451/NR1D1/PSMC5/MED13/PPM1D/NR1D2/NR2E1/NR4A3/NR6A1/MED27/GTF3C4/HNF1A/NR1H4/RARG/NR4A1/VDR/NR4A2/TAF5/CDK1/TAF3/HNF4G/NR2F6/MED26/TAF1C/CDK7/CCNB1/HNF4A/PGR/TAF1D/RSF1/TAF10/GTF2H1/NR1H3/PSMC3/FOSL1	49
GO:0043312	neutrophil degranulation	89/2886	485/18862	0.036192	0.171447	0.138229	GLA/CFP/DDX3X/PNP/ANPEP/PGM2/ADAM8/SLC27A2/PKM/CTSH/CREG1/PRDX6/ARL8A/TMEM63A/HSP90AA1/DYNC1H1/SERPINA1/STK10/NIT2/PSMD6/RHOA/NBEAL2/MGAM/UBR4/FUCA1/LRRC7/ILF2/NCSTN/HSPA6/ARSA/XRCC6/SYNGR1/VAPA/TUBB/HSPA1A/HSPA1B/HSP90AB1/ENPP4/EEF1A1/GAA/TIMP2/PSMD3/JUP/ACLY/GHDC/CD300A/TMC6/NME2/GYG1/PTX3/PLD1/PSMD2/HEBP2/LCN2/AGPAT2/CEP290/CCT2/LYZ/PA2G4/METTL7A/STK11IP/XRCC5/IDH1/PSMD14/VCL/GSDMD/FABP5/ASAH1…	89
GO:0071219	cellular response to molecule of bacterial origin	42/2886	209/18862	0.0363375	0.171873	0.138572	LDOC1/SERPINE1/TNFSF4/NFKBIA/TRIM41/IRAK2/WNT5A/RHOA/IL6/ZC3H12A/PDE4B/BCL10/NR1D1/HDAC5/SHPK/PRPF8/PRKCE/TNFAIP3/ADAMTS13/SCARB1/NR1H4/PDCD4/ANKRD1/MRC1/VIM/TRIB1/MTDH/RIPK2/HMGB2/NFKB1/CARD8/AXL/ZFP36/PAF1/NFKBIB/SIRT2/IRF8/SRC/TRIM5/CTR9/NR1H3/SIGIRR	42
GO:0051897	positive regulation of protein kinase B signaling	36/2886	175/18862	0.0365824	0.172185	0.138824	FGFR3/KLB/ADAM8/THBS1/HSP90AA1/FERMT2/FGFR4/FGF18/HBEGF/PIK3CD/HSP90AB1/ERBB2/C1QBP/FYN/TPBG/TXN/ENG/P2RX4/FRS2/ERBB3/IGFBP5/LRP2/TCF7L2/STK3/MTDH/FGFR1/AREG/EREG/AXL/GDF15/INSR/GAS6/F10/F7/FGF9/SRC	36
GO:0090263	positive regulation of canonical Wnt signaling pathway	31/2886	147/18862	0.0367794	0.172185	0.138824	GPC3/DDX3X/DACT1/PSME1/PSMD6/RNF220/PSMD3/JUP/PSMC5/AXIN2/PSMD2/RSPO3/WNK2/ROR2/KANK1/NRARP/LRRK2/PSMD14/JRK/UBR5/NFKB1/TRPM4/PLEKHA4/DAPK3/ZBED3/SRC/PSMA7/USP47/ARNTL/LGR4/PSMC3	31
GO:0043647	inositol phosphate metabolic process	17/2886	71/18862	0.0368448	0.172185	0.138824	PPIP5K1/HRH1/IP6K2/PTH1R/MIOX/INPP5J/IP6K3/PLCH1/SYNJ2/IPPK/INPP5D/INPP5A/MINPP1/IPMK/SYNJ1/PLCB1/INPPL1	17
GO:0002829	negative regulation of type 2 immune response	5/2886	13/18862	0.0368491	0.172185	0.138824	HLX/ARG2/BCL6/SOCS5/ANXA1	5
GO:0015801	aromatic amino acid transport	5/2886	13/18862	0.0368491	0.172185	0.138824	SLC38A5/SLC7A8/SLC38A3/SLC38A7/SLC3A2	5
GO:0016024	CDP-diacylglycerol biosynthetic process	5/2886	13/18862	0.0368491	0.172185	0.138824	AGPAT2/GPAM/AGPAT5/AGPAT3/CDS2	5
GO:0016558	protein import into peroxisome matrix	5/2886	13/18862	0.0368491	0.172185	0.138824	PEX1/PEX10/PEX14/PEX6/PEX2	5
GO:0032530	regulation of microvillus organization	5/2886	13/18862	0.0368491	0.172185	0.138824	ATP8B1/PLD1/VIL1/KLF5/USH1C	5
GO:0045741	positive regulation of epidermal growth factor-activated receptor activity	5/2886	13/18862	0.0368491	0.172185	0.138824	ADORA1/HBEGF/FBXW7/AREG/EREG	5
GO:0046341	CDP-diacylglycerol metabolic process	5/2886	13/18862	0.0368491	0.172185	0.138824	AGPAT2/GPAM/AGPAT5/AGPAT3/CDS2	5
GO:0070307	lens fiber cell development	5/2886	13/18862	0.0368491	0.172185	0.138824	EPHA2/WNT7B/ATF4/FRS2/VIM	5
GO:1902285	semaphorin-plexin signaling pathway involved in neuron projection guidance	5/2886	13/18862	0.0368491	0.172185	0.138824	PLXNA3/PLXNB3/PLXNA1/PLXND1/PLXNB1	5
GO:1904668	positive regulation of ubiquitin protein ligase activity	5/2886	13/18862	0.0368491	0.172185	0.138824	CDC20/BTRC/UBE2S/PLK1/CDC20B	5
GO:0033673	negative regulation of kinase activity	52/2886	267/18862	0.0372266	0.173818	0.14014	DUSP9/NR2F2/PRKAR1B/AGT/RGS2/DUSP10/DUSP1/NPM1/SPRY4/PPP2CA/PRKAG2/PRKAR2B/ERRFI1/EPHB2/CDKN2C/GADD45A/ADAR/GBA/DUSP18/PTPN2/TRIM27/STK38/CHMP6/PIP4K2B/HEXIM2/CD300A/DUSP14/PAK2/SH3BP5/TRIB2/SOCS5/SPRED2/TNFAIP3/DNAJA1/DUSP6/DUSP16/PDCD4/DUSP5/ITPRIP/SIRT1/TRIB1/DEPTOR/DUSP4/CDKN2D/DBNDD1/PLK1/SOCS1/LATS2/TRIB3/PKIG/CHORDC1/DUSP8	52
GO:0055007	cardiac muscle cell differentiation	25/2886	114/18862	0.0372857	0.173962	0.140256	PARP2/MEF2A/ALPK3/CACYBP/RGS2/DDX39B/VEGFA/TCAP/KDM6B/FHL2/TSC1/LRRC10/FRS2/OBSL1/NEB/NRAP/DKK1/SGCB/CALR/CCNB1/EFNB2/SIK1/BMP2/PAK1/SOX6	25
GO:0006890	retrograde vesicle-mediated transport, Golgi to endoplasmic reticulum	20/2886	87/18862	0.037435	0.174265	0.1405	KIF4A/KIF23/KIF26A/TMEM115/KIF2C/TAPBP/KIF1C/KIF3C/RACGAP1/GBF1/CENPE/COG4/KIF22/KIF2A/COG3/KIF3B/UVRAG/KIF18A/SCYL1/BET1L	20
GO:0006333	chromatin assembly or disassembly	44/2886	221/18862	0.037703	0.17538	0.141399	HDAC8/TSPYL2/BAZ1B/CDAN1/CENPL/NRDE2/MIS18BP1/NPM1/ARID1A/TAL1/SMCHD1/BRD2/DAXX/HMGA1/EZH1/CENPV/DNMT3A/CENPA/TSPYL1/CENPW/SHPRH/ANP32B/SART3/NAP1L1/HMGA2/PPHLN1/HAT1/SIRT1/SUV39H2/PARP10/KAT6A/CENPU/HMGB2/LIN54/PAF1/SIRT2/DNMT1/CHAF1A/MPHOSPH8/CHAF1B/ZNFX1/RSF1/SPTY2D1/MTA2	44
GO:0034660	ncRNA metabolic process	90/2886	492/18862	0.037852	0.175685	0.141645	UTP14A/ISG20/CPSF4/SRRT/HEATR1/RNASEL/TRMT1L/RPS14/SRFBP1/TSEN2/RRP9/RPL14/IL6/HNRNPA2B1/EXOSC10/RPL11/ZBTB8OS/AGO4/AGO1/ZC3H12A/ERI3/RPS8/RPL5/WDR3/WARS2/RPS27/ADAR/RTCB/DGCR8/RIOK3/RIOK1/RPP21/RPL10A/BYSL/EIF4A3/USP36/RPL27/RPL26/ELP5/RPS7/WDR43/RPS6/TEX10/RPL35/RAN/DHX37/PA2G4/BCDIN3D/WBP11/NOP2/DIS3L2/NOP58/MARS2/WDR75/RRP12/DDX21/PPA1/RPS24/NSUN6/GTPBP4/AGO2/RPL7/MYBL1/RRS1/CHD7/FRG1/EXOSC9/…	90
GO:0015807	L-amino acid transport	16/2886	66/18862	0.0378538	0.175685	0.141645	SLC38A5/SLC7A8/SLC7A7/SFXN1/SLC38A3/SLC47A1/CTNS/SLC3A1/SLC1A1/SLC38A2/PER2/SLC7A11/SLC1A5/SLC7A6/SLC38A7/SLC3A2	16
GO:0050771	negative regulation of axonogenesis	16/2886	66/18862	0.0378538	0.175685	0.141645	PLXNA3/SEMA4B/SEMA7A/WNT5A/SEMA3B/RHOA/SEMA3C/EPHB2/SEMA6C/RTN4R/KIAA0319/NGFR/WNT3/CDK5R1/SEMA4C/DIP2B	16
GO:0032373	positive regulation of sterol transport	9/2886	31/18862	0.0380297	0.176237	0.14209	NFKBIA/ABCB4/EEPD1/PTCH1/LRP1/LPCAT3/SIRT1/CETP/NR1H3	9
GO:0032376	positive regulation of cholesterol transport	9/2886	31/18862	0.0380297	0.176237	0.14209	NFKBIA/ABCB4/EEPD1/PTCH1/LRP1/LPCAT3/SIRT1/CETP/NR1H3	9
GO:0019217	regulation of fatty acid metabolic process	22/2886	98/18862	0.038455	0.178074	0.143571	ABCD1/MID1IP1/SLC45A3/PPARG/INSIG1/PRKAG2/WDTC1/MFSD2A/PDK2/ANXA1/NR4A3/ACACB/APPL2/ADIPOR2/SIRT1/FABP5/AKT2/PDPR/PIBF1/TRIB3/APOA4/NR1H3	22
GO:0031060	regulation of histone methylation	15/2886	61/18862	0.0387569	0.179204	0.144482	WDR61/PAXIP1/KMT2E/MTHFR/MTF2/PYGO2/MLLT6/SUPT6H/PHF19/IWS1/SIRT1/ZNF274/PAF1/DNMT1/CTR9	15
GO:0046824	positive regulation of nucleocytoplasmic transport	15/2886	61/18862	0.0387569	0.179204	0.144482	CTDSPL2/DHX9/NRDE2/SMO/ZC3H12A/HSP90AB1/JUP/ANP32B/RAN/BAG3/TCF7L2/UBR5/GAS6/XPO4/MAVS	15
GO:0072329	monocarboxylic acid catabolic process	28/2886	131/18862	0.0389647	0.18003	0.145148	ABCD1/IVD/SLC27A2/ABCD4/ACOX2/CROT/MFSD2A/CPT2/HAO2/CPT1B/ECI2/ADTRP/ALDH3A2/XYLB/ACAT2/IDNK/SLC27A4/CEL/ACADS/ACACB/HOGA1/PHYH/PEX2/AKT2/ILVBL/AMACR/CRYL1/LPIN3	28
GO:0042311	vasodilation	10/2886	36/18862	0.0394706	0.181732	0.14652	RGS2/ADORA1/BDKRB2/GCH1/ADRB2/CASR/ADRB1/PRKG1/BBS2/SOD1	10
GO:0045066	regulatory T cell differentiation	10/2886	36/18862	0.0394706	0.181732	0.14652	TNFSF4/CD46/DUSP10/IRF1/LGALS9/BCL6/SOCS1/RUNX1/SOX12/NFATC2	10
GO:0006814	sodium ion transport	47/2886	239/18862	0.0395078	0.181732	0.14652	SLC12A1/SLC9C2/ATP2B4/SLC34A1/ADRB2/SLC23A1/SLC6A6/SLC38A3/HECW1/SLC5A9/ATP1A4/NETO1/SLC17A4/SLC17A1/SLC17A3/MLLT6/PER1/FGF11/PRKCE/SLC20A1/CNKSR3/SGK1/UTRN/WNK2/P2RX4/TPCN1/SCN8A/SLC38A2/SCN9A/SCN2A/ANK3/KIF5B/SLC20A2/TRPM4/SPTBN4/SLC9A5/SLC38A7/CACNA1H/GLRX/SLC6A18/SLC9A3/SIK1/SLC5A3/SLC23A2/SLC9A8/SLC3A2/DRD4	47
GO:0010559	regulation of glycoprotein biosynthetic process	14/2886	56/18862	0.0395094	0.181732	0.14652	HBEGF/TMEM59/NCSTN/BCL2/PXYLP1/ACER2/ABCA2/PAWR/ITM2C/TCF7L2/AGO2/BACE2/PLCB1/SLC2A10	14
GO:1902808	positive regulation of cell cycle G1/S phase transition	14/2886	56/18862	0.0395094	0.181732	0.14652	DDX3X/HYAL1/EZH2/KMT2E/CDC6/STXBP4/EIF4G1/ANXA1/GLI1/ANKRD17/PAF1/CDK10/RGCC/PLCB1	14
GO:0071715	icosanoid transport	13/2886	51/18862	0.040052	0.18274	0.147334	BDKRB2/TNFRSF11A/ABCC10/ABCC3/PROCA1/SLCO2A1/ANXA1/P2RX4/PLA2R1/PLA2G12A/ABCC6/ABCC1/DRD4	13
GO:0007099	centriole replication	11/2886	41/18862	0.0401605	0.18274	0.147334	NPM1/SPICE1/STIL/CEP76/RTTN/CCDC57/PLK4/CEP135/CHMP2A/PLK2/C2CD3	11
GO:0046636	negative regulation of alpha-beta T cell activation	11/2886	41/18862	0.0401605	0.18274	0.147334	TNFSF4/HLX/ARG2/ZC3H12A/CD300A/LGALS9/BCL6/SOCS5/ANXA1/SOCS1/RUNX1	11
GO:0070317	negative regulation of G0 to G1 transition	11/2886	41/18862	0.0401605	0.18274	0.147334	FOXO4/MAX/RYBP/EZH2/CDC7/RBBP8/TFDP2/YAF2/EPC1/BMI1/E2F1	11
GO:0090317	negative regulation of intracellular protein transport	11/2886	41/18862	0.0401605	0.18274	0.147334	YOD1/INSIG1/RANGAP1/TXN/OS9/LRRK2/BAG3/SUFU/DMTN/UFM1/PKIG	11
GO:1902042	negative regulation of extrinsic apoptotic signaling pathway via death domain receptors	11/2886	41/18862	0.0401605	0.18274	0.147334	DDX3X/SERPINE1/RAF1/PEA15/HMOX1/RIPK1/TNFAIP3/ITPRIP/FAS/TNFRSF10B/HMGB2	11
GO:0002088	lens development in camera-type eye	18/2886	77/18862	0.040229	0.18274	0.147334	NHS/KDM5B/CRYBG3/WNT5A/EPHA2/BCAR3/WNT2B/PYGO2/WNT7B/ATF4/CTNS/SKIL/SPRED2/FRS2/VIM/SLC7A11/SIX5/MAF	18
GO:0051205	protein insertion into membrane	18/2886	77/18862	0.040229	0.18274	0.147334	BMF/TP53BP2/HSP90AA1/EMC9/HSPA4/TP73/PMAIP1/BCL2/TRAM2/RTP2/TFDP2/BCL2L11/YWHAZ/EMC10/BBC3/PDCD5/GRIN3B/E2F1	18
GO:0070316	regulation of G0 to G1 transition	12/2886	46/18862	0.040305	0.18274	0.147334	FOXO4/MAX/RYBP/EZH2/CDC7/RBBP8/SOX15/TFDP2/YAF2/EPC1/BMI1/E2F1	12
GO:0072583	clathrin-dependent endocytosis	12/2886	46/18862	0.040305	0.18274	0.147334	UBQLN2/CLTB/SMAP1/TNK2/GPR107/HIP1R/SCYL2/DGKD/ITGA4/FCHO1/PIP5K1C/DAB2	12
GO:0000717	nucleotide-excision repair, DNA duplex unwinding	7/2886	22/18862	0.0404382	0.18274	0.147334	XPC/GTF2H4/UBB/RPS27A/UBC/UBA52/GTF2H1	7
GO:0010888	negative regulation of lipid storage	7/2886	22/18862	0.0404382	0.18274	0.147334	NFKBIA/PPARG/ABHD5/IL6/PTPN2/ASXL1/NR1H3	7
GO:0032727	positive regulation of interferon-alpha production	7/2886	22/18862	0.0404382	0.18274	0.147334	DDX3X/DHX9/SETD2/HSPD1/RIPK2/TLR3/MAVS	7
GO:0033081	regulation of T cell differentiation in thymus	7/2886	22/18862	0.0404382	0.18274	0.147334	ADAM8/SOS2/PTPN2/ERBB2/FOXJ1/EGR3/SOD1	7
GO:0043371	negative regulation of CD4-positive, alpha-beta T cell differentiation	7/2886	22/18862	0.0404382	0.18274	0.147334	TNFSF4/HLX/ZC3H12A/BCL6/SOCS5/ANXA1/RUNX1	7
GO:0051151	negative regulation of smooth muscle cell differentiation	7/2886	22/18862	0.0404382	0.18274	0.147334	FOXO4/PDCD4/EREG/ANKRD17/DNMT1/FGF9/NFATC2	7
GO:0071404	cellular response to low-density lipoprotein particle stimulus	7/2886	22/18862	0.0404382	0.18274	0.147334	CASR/PPARG/NPC1/SOCS5/LDLR/HMGCS1/ITGB2	7
GO:1903077	negative regulation of protein localization to plasma membrane	7/2886	22/18862	0.0404382	0.18274	0.147334	NUMB/RSC1A1/TMEM59/LRRC15/PKDCC/DAB2/PPFIA1	7
GO:0006631	fatty acid metabolic process	73/2886	392/18862	0.0404925	0.182852	0.147424	ABCD1/ACSL4/MID1IP1/IVD/SLC27A2/SLC45A3/EPHX1/ABCD4/PPARG/ACOX2/ABHD5/INSIG1/PRKAG2/PRKAR2B/CROT/PON2/WDTC1/MFSD2A/CPT2/ACOT11/HAO2/CPT1B/ZADH2/ECI2/ADTRP/FASN/ACLY/PDK2/ACSF2/ALDH3A2/ALOXE3/LIPH/QKI/ACAT2/ANXA1/NR4A3/SLC27A4/CEL/ACADS/ACACB/APPL2/PTGES3/ADIPOR2/PER2/ACADSB/ACSL5/GPAM/SCD/SIRT1/PHYH/ECHDC3/FABP5/PEX2/EPHX2/ASAH1/ACSL1/CBR4/MSMO1/AKT2/ILVBL/C3/GPX4/PDPR/ACSM3/ACSM5/AMACR/PIBF1/CRY…	73
GO:0030038	contractile actin filament bundle assembly	23/2886	104/18862	0.0407308	0.183392	0.147859	TJP1/TGFB3/FERMT2/RHOA/ZYX/ARHGEF10L/ASAP3/ARHGAP28/SERPINF2/PAK2/CLASP2/TSC1/CUL3/SORBS1/PDLIM1/DLC1/FHDC1/ARHGEF18/RGCC/SRC/PAK1/ARAP1/PPFIA1	23
GO:0043149	stress fiber assembly	23/2886	104/18862	0.0407308	0.183392	0.147859	TJP1/TGFB3/FERMT2/RHOA/ZYX/ARHGEF10L/ASAP3/ARHGAP28/SERPINF2/PAK2/CLASP2/TSC1/CUL3/SORBS1/PDLIM1/DLC1/FHDC1/ARHGEF18/RGCC/SRC/PAK1/ARAP1/PPFIA1	23
GO:0061387	regulation of extent of cell growth	23/2886	104/18862	0.0407308	0.183392	0.147859	PLXNA3/SEMA4B/SEMA7A/WNT5A/SEMA3B/SEMA3C/MACF1/NGF/SEMA6C/RTN4R/KIAA0319/VEGFA/WNT3/CDK5R1/SEMA4C/ANAPC2/LRP1/DIP2B/ZFYVE27/DPYSL2/MEGF8/MAP1B/PAK1	23
GO:2000060	positive regulation of ubiquitin-dependent protein catabolic process	23/2886	104/18862	0.0407308	0.183392	0.147859	UBQLN2/SMURF1/CSNK1A1/RNF19B/CDC20/PLK3/GBA/HSPA1A/HSPA1B/TRIB2/SOCS5/CHFR/LRRK2/TRIB1/FBXW7/SIRT2/KEAP1/PLK1/PLK2/CDC20B/DAB2/TRIB3/AURKA	23
GO:1902107	positive regulation of leukocyte differentiation	32/2886	154/18862	0.0412073	0.185134	0.149263	MMP14/PNP/ADAM8/TNFSF4/CD46/HLX/DUSP10/JUN/CSF1/XRCC6/RIPK1/CD83/LGALS9/BCL6/SOCS5/ROR2/ANXA1/INPP5D/TRIB1/KLF10/RIPK2/CA2/IL7/EGR3/AXL/NFKBID/SOCS1/GAS6/POU4F1/RUNX1/SOX12/GNAS	32
GO:1903708	positive regulation of hemopoiesis	32/2886	154/18862	0.0412073	0.185134	0.149263	MMP14/PNP/ADAM8/TNFSF4/CD46/HLX/DUSP10/JUN/CSF1/XRCC6/RIPK1/CD83/LGALS9/BCL6/SOCS5/ROR2/ANXA1/INPP5D/TRIB1/KLF10/RIPK2/CA2/IL7/EGR3/AXL/NFKBID/SOCS1/GAS6/POU4F1/RUNX1/SOX12/GNAS	32
GO:0002283	neutrophil activation involved in immune response	89/2886	488/18862	0.0413087	0.185454	0.149522	GLA/CFP/DDX3X/PNP/ANPEP/PGM2/ADAM8/SLC27A2/PKM/CTSH/CREG1/PRDX6/ARL8A/TMEM63A/HSP90AA1/DYNC1H1/SERPINA1/STK10/NIT2/PSMD6/RHOA/NBEAL2/MGAM/UBR4/FUCA1/LRRC7/ILF2/NCSTN/HSPA6/ARSA/XRCC6/SYNGR1/VAPA/TUBB/HSPA1A/HSPA1B/HSP90AB1/ENPP4/EEF1A1/GAA/TIMP2/PSMD3/JUP/ACLY/GHDC/CD300A/TMC6/NME2/GYG1/PTX3/PLD1/PSMD2/HEBP2/LCN2/AGPAT2/CEP290/CCT2/LYZ/PA2G4/METTL7A/STK11IP/XRCC5/IDH1/PSMD14/VCL/GSDMD/FABP5/ASAH1…	89
GO:0051298	centrosome duplication	17/2886	72/18862	0.0415963	0.186474	0.150344	NPM1/SPICE1/STIL/CEP76/RTTN/PKHD1/CCDC57/SIRT1/TMEM67/PLK4/CEP135/CHMP2A/PLK2/CHORDC1/C2CD3/NAT10/CKAP5	17
GO:1903036	positive regulation of response to wounding	17/2886	72/18862	0.0415963	0.186474	0.150344	SERPINE1/CLDN4/THBS1/FERMT2/F12/HBEGF/MYLK/ENPP4/SERPINF2/SCARF1/PRKCE/ANXA1/KANK1/LRP1/DMTN/OCLN/F7	17
GO:1903312	negative regulation of mRNA metabolic process	20/2886	88/18862	0.0417196	0.186892	0.150681	HNRNPC/DHX9/HNRNPA2B1/YBX1/EIF4ENIF1/AXIN2/C1QBP/SRSF7/HNRNPK/SFSWAP/PABPC1/HNRNPD/ZFP36/ELAVL1/PTBP1/RNPS1/DYRK1A/E2F1/CTR9/PKP3	20
GO:0008286	insulin receptor signaling pathway	30/2886	143/18862	0.0419259	0.187493	0.151166	FOXO4/BAIAP2L1/SH2B2/ATP6V1A/ATP6V0A4/BCAR3/PTPN2/BAIAP2/PIP4K2B/PDK2/STXBP4/PHIP/KANK1/SLC27A4/TSC1/NR1H4/C2CD5/GRB14/SORBS1/SIRT1/EIF4EBP2/ATP6V1H/AKT2/INSR/SOCS1/FOXO1/SNX5/SRC/SIK2/PAK1	30
GO:0048592	eye morphogenesis	30/2886	143/18862	0.0419259	0.187493	0.151166	BBS4/HIF1A/COL8A1/IFT122/WNT5A/EPHA2/EPHB2/MFSD2A/BCAR3/WNT2B/ATF4/BCL2/VEGFA/FSCN2/IFT172/EFEMP1/AHI1/AGTPBP1/SLC1A1/TOPORS/KDM2B/CEP290/FRS2/RARG/OBSL1/PITX2/RPGRIP1L/TSKU/USH1C/PAX6	30
GO:0008654	phospholipid biosynthetic process	52/2886	269/18862	0.0419449	0.187493	0.151166	ACHE/DGKQ/LPCAT4/ETNK2/PIK3C2B/SPTLC2/ABHD5/PIK3CD/MFSD2A/PIP5K1A/PMVK/FDPS/CHKB/INPP5J/MPPE1/PIGN/SLC44A4/PIP4K2B/PGAP3/PCTP/MTMR4/PIGW/PLD1/LIPH/DGKG/SYNJ2/FIG4/PIP5K1B/AGPAT2/ABCA2/NR1H4/GPD1/LPCAT3/DGKD/INPP5D/IDH1/GPAM/FABP5/AGPAT5/PLA2G12A/PLEKHA4/PIP5K1C/SERINC5/HMGCS1/DGKH/AGPAT3/SYNJ1/CDS2/LPIN3/ATM/INPPL1/FADS1	52
GO:0031214	biomineral tissue development	33/2886	160/18862	0.0424128	0.189448	0.152742	GPC3/PHEX/FAM20C/FGFR3/TGFB3/HIF1A/ADRB2/LOX/PTH1R/ISG15/ALPL/TUFT1/DDR2/ATF4/AXIN2/IFT80/ATRAID/PKDCC/EIF2AK3/SLC20A1/ROR2/TMEM119/MINPP1/BMPR1A/KLF10/HEY1/ENAM/TRPM4/SMPD3/GAS6/FOXO1/BMP2/LGR4	33
GO:0061371	determination of heart left/right asymmetry	16/2886	67/18862	0.0429137	0.191409	0.154322	BBS4/HIF1A/WNT5A/SMO/STIL/CCDC40/CCDC103/CCDC39/IFT172/AHI1/ENG/TBR1/SUFU/FOXH1/MEGF8/C2CD3	16
GO:0017148	negative regulation of translation	41/2886	206/18862	0.0437583	0.195035	0.157246	DDX3X/CPEB2/IREB2/RGS2/BTG2/EIF2S1/SAMD4A/CPEB4/PUM1/AGO4/AGO1/ZC3H12A/YBX1/TNRC6B/ATF4/EIF4ENIF1/EIF4A3/GRB7/SHMT1/FXR1/EIF4G1/EIF2AK3/TSC1/GAPDH/GIGYF2/EIF4E2/NCL/IGFBP5/NANOS1/EIF4EBP2/AGO2/HNRNPD/RPL13A/ZFP36/CALR/ILF3/DAPK3/CNOT1/ENC1/YTHDF1/RPS3	41
GO:0007143	female meiotic nuclear division	8/2886	27/18862	0.0439583	0.195786	0.157851	MLH3/TOP2A/UBB/TTK/EREG/PLK1/AURKA/ATM	8
GO:0051961	negative regulation of nervous system development	29/2886	138/18862	0.0440222	0.195929	0.157967	PLXNA3/SEMA4B/SEMA7A/DUSP10/ROBO2/WNT5A/SEMA3B/RHOA/SEMA3C/IL6/EPHB2/SEMA6C/RTN4R/KIAA0319/NGFR/NR1D1/WNT3/NOG/CDK5R1/HES1/SEMA4C/NR2E1/RNF10/APPL2/DIP2B/BMPR1A/SIRT2/LDLR/PAX6	29
GO:0031122	cytoplasmic microtubule organization	15/2886	62/18862	0.0441492	0.196212	0.158195	WDR73/TUBGCP5/CAMSAP2/DYNC1H1/CCDC88C/RHOA/PLK3/TUBGCP6/DST/TUBG1/IFT172/CLIP1/TRPV4/STMN3/CCDC88B	15
GO:1903018	regulation of glycoprotein metabolic process	15/2886	62/18862	0.0441492	0.196212	0.158195	HBEGF/TMEM59/NCSTN/BCL2/PXYLP1/PTX3/ACER2/ABCA2/PAWR/ITM2C/TCF7L2/AGO2/BACE2/PLCB1/SLC2A10	15
GO:0030968	endoplasmic reticulum unfolded protein response	27/2886	127/18862	0.0445759	0.197824	0.159494	TSPYL2/MBTPS2/TMEM33/PPP1R15B/YOD1/ATF3/EIF2S1/ASNS/ZBTB17/EXTL2/LMNA/ATF4/PTPN2/ATF6B/CUL7/GOSR2/EIF2AK3/BCL2L11/UFL1/ERMP1/HSPA5/DDIT3/EXTL3/CALR/MBTPS1/TMTC4/TPP1	27
GO:1903052	positive regulation of proteolysis involved in cellular protein catabolic process	27/2886	127/18862	0.0445759	0.197824	0.159494	UBQLN2/SMURF1/CSNK1A1/RNF19B/CDC20/PLK3/GBA/RNF185/HSPA1A/HSPA1B/OSBPL7/TRIB2/SOCS5/CHFR/LRRK2/TRIB1/FBXW7/SIRT2/KEAP1/PLK1/PLK2/CDC20B/DAB2/TRIB3/AURKA/CTSC/PSMC3	27
GO:0006637	acyl-CoA metabolic process	23/2886	105/18862	0.0448692	0.198697	0.160199	ABCD1/ACSL4/HMGCL/ACOT11/PMVK/FASN/ACLY/PDK2/ACSF2/ACACB/ACSL5/GPAM/SCD/ACSL1/AADAT/CBR4/PDPR/ACSM3/ACSM5/HMGCS1/DIP2A/PDHX/GLYAT	23
GO:1903707	negative regulation of hemopoiesis	23/2886	105/18862	0.0448692	0.198697	0.160199	TNFSF4/HLX/HSPA9/IRF1/LRRC17/INHBA/ZC3H12A/PTPN2/ERBB2/FOXJ1/NME2/BCL6/SOCS5/ANXA1/NRARP/INPP5D/MYC/TRIB1/TLR3/FBXW7/ZFPM1/SOCS1/RUNX1	23
GO:0001570	vasculogenesis	18/2886	78/18862	0.0450845	0.199508	0.160852	SETD2/PAXIP1/SMO/EPHA2/WARS2/WNT7B/CUL7/VEGFA/GJC1/TIPARP/QKI/ENG/HEY1/FBXW7/JUNB/FZD4/ADM/APLNR	18
GO:0000381	regulation of alternative mRNA splicing, via spliceosome	14/2886	57/18862	0.04526	0.19957	0.160903	RBM15/RBFOX3/DDX5/FXR1/TRA2B/WTAP/ZC3H10/PUF60/KHDRBS3/YTHDC1/NOVA2/PTBP1/RNPS1/DYRK1A	14
GO:0030520	intracellular estrogen receptor signaling pathway	14/2886	57/18862	0.04526	0.19957	0.160903	TRIP4/ESR2/ARID1A/DDX5/UFL1/GPAM/FOXH1/KANK2/SAFB/CNOT1/UFM1/RUNX1/SRC/PAK1	14
GO:0046854	phosphatidylinositol phosphorylation	14/2886	57/18862	0.04526	0.19957	0.160903	PIK3C2B/IP6K2/PIK3CD/PIP5K1A/IP6K3/PIP4K2B/SOCS5/TMEM150A/PIP5K1B/SOCS2/IPMK/PIP5K1C/SMG1/SOCS1	14
GO:0061178	regulation of insulin secretion involved in cellular response to glucose stimulus	14/2886	57/18862	0.04526	0.19957	0.160903	CDK16/HIF1A/EFNA5/PIM3/NR1D1/STXBP4/PRKCE/HMGN3/NR1H4/LRP1/KIF5B/TRPM4/OXCT1/TIAM1	14
GO:0010675	regulation of cellular carbohydrate metabolic process	30/2886	144/18862	0.0454746	0.199936	0.161198	PPP1R3E/DGKQ/SLC45A3/HRH1/MST1/PTH1R/SLC35B4/IGFBP3/LEPR/PTPN2/PMAIP1/PDK2/KHK/PPP1CB/PRKCE/RANBP2/ACACB/CRY1/SORBS1/PPP1R3C/SIRT1/DDIT4/GPT/NCOA2/SCARB2/AKT2/INSR/NLN/SIK1/SRC	30
GO:0035051	cardiocyte differentiation	30/2886	144/18862	0.0454746	0.199936	0.161198	PARP2/MEF2A/ALPK3/CACYBP/RGS2/TGFB2/SEMA3C/DDX39B/VEGFA/TCAP/KDM6B/HES1/FHL2/TSC1/LRRC10/FRS2/OBSL1/NEB/NRAP/PDCD4/DKK1/PITX2/SGCB/CALR/CCNB1/EFNB2/SIK1/BMP2/PAK1/SOX6	30
GO:0031468	nuclear envelope reassembly	6/2886	18/18862	0.0455371	0.199936	0.161198	VRK1/PPP2CA/LMNA/UBXN2B/PPP2R2A/CHMP2A	6
GO:0045063	T-helper 1 cell differentiation	6/2886	18/18862	0.0455371	0.199936	0.161198	TNFSF4/HLX/SOCS5/ANXA1/RIPK2/RELB	6
GO:0045623	negative regulation of T-helper cell differentiation	6/2886	18/18862	0.0455371	0.199936	0.161198	TNFSF4/HLX/ZC3H12A/BCL6/SOCS5/ANXA1	6
GO:0046112	nucleobase biosynthetic process	6/2886	18/18862	0.0455371	0.199936	0.161198	HPRT1/CTPS1/SHMT1/GMPS/DHODH/GART	6
GO:0016485	protein processing	44/2886	224/18862	0.0458324	0.200974	0.162035	PHEX/MMP14/SERPINE1/ADAM8/THBS1/CHAC1/CTSH/SPRTN/ADAMTS2/F12/TMEM59/OMA1/NGF/IFI16/NCSTN/TBC1D10A/SEC11C/SERPINF2/IFT172/IL1R2/PTCH1/GAS1/ADAMTS13/MYRFL/DHH/LRRK2/C1RL/C1R/LPCAT3/RIPK2/PRSS12/CARD8/HPN/PCSK4/F7/CLN5/BACE2/RUNX1/SRC/BACE1/SPCS2/C2CD3/FAM111A/MYRF	44
GO:0038128	ERBB2 signaling pathway	9/2886	32/18862	0.0459685	0.200974	0.162035	HSP90AA1/HBEGF/ERBB2/GRB7/ERBB3/PTPN18/EREG/CDC37/SRC	9
GO:0043372	positive regulation of CD4-positive, alpha-beta T cell differentiation	9/2886	32/18862	0.0459685	0.200974	0.162035	TNFSF4/HLX/CD83/LGALS9/SOCS5/ANXA1/RIPK2/NFKBID/SOCS1	9
GO:0046825	regulation of protein export from nucleus	9/2886	32/18862	0.0459685	0.200974	0.162035	CTDSPL2/PTPN14/RANGAP1/ANP32B/TXN/BAG3/TCF7L2/GAS6/XPO4	9
GO:0048384	retinoic acid receptor signaling pathway	9/2886	32/18862	0.0459685	0.200974	0.162035	ESRRG/PPARG/EZH2/DHRS3/RARG/ZNF536/CALR/CNOT1/ASXL1	9
GO:2000515	negative regulation of CD4-positive, alpha-beta T cell activation	9/2886	32/18862	0.0459685	0.200974	0.162035	TNFSF4/HLX/ARG2/ZC3H12A/LGALS9/BCL6/SOCS5/ANXA1/RUNX1	9
GO:0061014	positive regulation of mRNA catabolic process	13/2886	52/18862	0.0461883	0.201792	0.162694	BTG2/PUM1/ZC3H12A/TNRC6B/EIF4ENIF1/GIGYF2/NANOS1/AGO2/PABPC1/HNRNPD/ZFP36/CNOT1/YTHDF1	13
GO:0050768	negative regulation of neurogenesis	28/2886	133/18862	0.0462278	0.201822	0.162718	PLXNA3/SEMA4B/SEMA7A/DUSP10/WNT5A/SEMA3B/RHOA/SEMA3C/IL6/EPHB2/SEMA6C/RTN4R/KIAA0319/NGFR/NR1D1/WNT3/NOG/CDK5R1/HES1/SEMA4C/NR2E1/RNF10/APPL2/DIP2B/BMPR1A/SIRT2/LDLR/PAX6	28
GO:0000380	alternative mRNA splicing, via spliceosome	17/2886	73/18862	0.0467726	0.202952	0.163629	DHX9/RBM15/RBFOX3/DDX5/SRSF1/FXR1/TRA2B/WTAP/SFSWAP/ZC3H10/PUF60/KHDRBS3/YTHDC1/NOVA2/PTBP1/RNPS1/DYRK1A	17
GO:0015918	sterol transport	26/2886	122/18862	0.0467751	0.202952	0.163629	NFKBIA/OSBPL11/ABCB4/OSBPL3/EEPD1/NPC1/OSBPL7/STARD3/PTCH1/CEL/ABCA2/SCARB1/LRP1/LIMA1/LPCAT3/SIRT1/NFKB1/LDLR/CETP/GRAMD1B/APOA4/TSKU/NR1H3/OSBP/SYT7/OSBPL5	26
GO:0031929	TOR signaling	26/2886	122/18862	0.0467751	0.202952	0.163629	LAMTOR4/DGKQ/UBR1/DYRK3/HIF1A/FNIP1/RHEB/MIOS/GBA/PRR5/KLHL22/PKHD1/TMEM127/RPS6/TSC1/ITFG2/SH3BP4/SIRT1/EIF4EBP2/DDIT4/DEPTOR/SMG1/GAS6/TTI1/ATM/ARNTL	26
GO:0006090	pyruvate metabolic process	31/2886	150/18862	0.0468425	0.202952	0.163629	PKM/ENTPD5/HIF1A/PFKFB4/PRKAG2/NUP205/PGAM2/ME2/NUP153/SLC16A3/PDK2/ENO3/SRR/RANBP2/NR4A3/GPD1/ENO2/GAPDH/HOGA1/HKDC1/HK1/DDIT4/PFKFB3/PFKP/INSR/PDPR/NUP155/NUP98/PDHX/NUP160/PC	31
GO:0006111	regulation of gluconeogenesis	12/2886	47/18862	0.0468554	0.202952	0.163629	DGKQ/MST1/SLC35B4/LEPR/PTPN2/PDK2/RANBP2/CRY1/SIRT1/GPT/NLN/SIK1	12
GO:0006383	transcription by RNA polymerase III	12/2886	47/18862	0.0468554	0.202952	0.163629	CHD8/BRF1/POLR3C/GTF3C2/GTF3C6/GTF3C4/GTF3C3/ELL/SNAPC2/GTF3A/POLR3F/ZNF143	12
GO:0035722	interleukin-12-mediated signaling pathway	12/2886	47/18862	0.0468554	0.202952	0.163629	HSPA9/HNRNPA2B1/IL12RB2/PAK2/IL12A/TCP1/RPLP0/PDCD4/HNRNPDL/SOD1/PLCB1/TALDO1	12
GO:0120163	negative regulation of cold-induced thermogenesis	12/2886	47/18862	0.0468554	0.202952	0.163629	RHEB/ACOT11/ATF4/NR1D1/PCTP/PGAM5/DDIT3/NOVA2/ARRDC3/ARNTL/LGR4/NR1H3	12
GO:0000462	maturation of SSU-rRNA from tricistronic rRNA transcript (SSU-rRNA, 5.8S rRNA, LSU-rRNA)	10/2886	37/18862	0.0469292	0.202952	0.163629	HEATR1/RPS14/RPS8/BYSL/DHX37/RRS1/RPS19/RPS16/FAM207A/RPS21	10
GO:0035886	vascular associated smooth muscle cell differentiation	10/2886	37/18862	0.0469292	0.202952	0.163629	VEGFA/HES1/ENG/PDCD4/EPC1/SGCB/DNMT1/FGF9/NFATC2/ADM	10
GO:0032006	regulation of TOR signaling	22/2886	100/18862	0.0469463	0.202952	0.163629	LAMTOR4/DGKQ/UBR1/DYRK3/HIF1A/FNIP1/RHEB/MIOS/GBA/KLHL22/PKHD1/TMEM127/TSC1/ITFG2/SH3BP4/SIRT1/DDIT4/DEPTOR/GAS6/TTI1/ATM/ARNTL	22
GO:1902750	negative regulation of cell cycle G2/M phase transition	24/2886	111/18862	0.0470459	0.202994	0.163663	FOXO4/PSME1/UIMC1/PSMD6/HUS1/MIIP/ORC1/PSMD3/CDC6/PSMC5/AURKB/PSMD2/HMGA2/NABP1/PSMD14/CDK1/RAD21/ATF5/PLK1/AURKA/PSMA7/ATM/USP47/PSMC3	24
GO:0009259	ribonucleotide metabolic process	78/2886	425/18862	0.0470477	0.202994	0.163663	ATP6/ATP8/COX2/ABCD1/HPRT1/ACSL4/UPRT/DNAJC30/SLC26A1/PKM/UCK2/ADCY10/ENTPD5/HIF1A/HINT1/ATP6V1A/PFKFB4/PRKAG2/NUP205/LRGUK/CROT/PGAM2/UPP1/EPHA2/HMGCL/CTPS1/ACOT11/AK4/PDE4B/PMVK/NUP153/FASN/ACLY/PDK2/ACSF2/NME2/ENO3/GMPS/RANBP2/NT5E/NPR2/RAN/ACACB/GPD1/ADCY6/LRRK2/GUCY2C/ENO2/GAPDH/ACSL5/GPAM/NT5C2/SCD/HKDC1/HK1/DDIT4/PFKFB3/PFKP/ACSL1/AADAT/CBR4/SULT1E1/INSR/DHODH/PDPR/ACSM3/ACSM5/ADCY9/MCCC2/…	78
GO:0014002	astrocyte development	11/2886	42/18862	0.047153	0.202994	0.163663	LAMB2/SMO/IL6/TTBK1/NR1D1/EIF2B5/ROR2/LRP1/VIM/LDLR/BACE2	11
GO:0019985	translesion synthesis	11/2886	42/18862	0.047153	0.202994	0.163663	SPRTN/ISG15/POLI/TRIM25/UBB/RPS27A/REV3L/UBC/PARP10/UBA52/POLD3	11
GO:0045687	positive regulation of glial cell differentiation	11/2886	42/18862	0.047153	0.202994	0.163663	PPARG/RHEB/TP73/TTBK1/RNF112/ASPA/HES1/HDAC2/EGR2/BMP2/CLCF1	11
GO:0043543	protein acylation	47/2886	242/18862	0.0475762	0.204674	0.165017	DDX3X/EID1/TAF5L/MBIP/BAZ1A/JADE2/BRPF1/SETD5/PAXIP1/CHD5/PYGO2/MUC1/ATAT1/BRPF3/ZNF451/KANSL1/SPHK1/KAT7/TADA2A/USP22/PER1/HDAC2/ZDHHC21/GTF3C4/DIP2B/KANSL2/ING4/ATF2/HAT1/IWS1/ZDHHC6/TAF5/SIRT1/EPC1/KAT6A/NAA15/JADE1/ZDHHC1/NAA16/FOXO1/DIP2A/PHF20/TAF10/ARNTL/NAT10/ZDHHC5/ZDHHC24	47
GO:0048813	dendrite morphogenesis	29/2886	139/18862	0.0477808	0.205411	0.165612	HPRT1/HDAC6/MEF2A/HECW1/CAMK2B/EPHB2/CELSR2/CHRNB2/DCDC2/CUL7/CDK5R1/MINK1/NLGN1/NR2E1/FYN/TPBG/ANAPC2/LRRK2/OBSL1/ARC/SHANK1/ARHGAP33/FBXO31/SLITRK5/DIP2A/TIAM1/BTBD3/MAP6/SHANK2	29
GO:0014031	mesenchymal cell development	19/2886	84/18862	0.0483277	0.207618	0.167391	EFNB1/SEMA4B/RADIL/SEMA7A/HIF1A/SEMA3B/SMO/SEMA3C/HEYL/SEMA6C/CDH2/BCL2/FOXC1/HES1/SEMA4C/ALX1/GBX2/BMPR1A/PITX2	19
GO:0006360	transcription by RNA polymerase I	16/2886	68/18862	0.0484377	0.207801	0.167539	HEATR1/ATF4/GTF2H4/ERBB2/WDR43/EIF2AK3/IPPK/TTF1/NCL/WDR75/TAF1C/UTP15/CDK7/POU4F1/TAF1D/GTF2H1	16
GO:0043967	histone H4 acetylation	16/2886	68/18862	0.0484377	0.207801	0.167539	JADE2/CHD5/MUC1/KANSL1/KAT7/USP22/PER1/KANSL2/ING4/ATF2/HAT1/IWS1/SIRT1/EPC1/JADE1/PHF20	16
GO:0048706	embryonic skeletal system development	25/2886	117/18862	0.0490838	0.210219	0.169488	MMP14/PBX1/TGFB3/SIX4/NDST1/WNT5A/HYAL1/SETD2/HOXA2/HOXA3/EIF4A3/HOXB9/HOXB5/NOG/MTHFD1L/CHST11/ALX1/HOXC6/HOXC4/TULP3/HOXD3/HOXD4/MEGF8/SLC2A10/GNAS	25
GO:0055092	sterol homeostasis	21/2886	95/18862	0.0491032	0.210219	0.169488	ABCD1/FGFR4/INSIG1/NPC1/NR1D1/CD24/ABCA2/SCARB1/NR1H4/LIMA1/SIRT1/GPIHBP1/EPHX2/LDLR/CETP/ACSM3/HNF4A/GRAMD1B/APOA4/TSKU/NR1H3	21
GO:0060337	type I interferon signaling pathway	21/2886	95/18862	0.0491032	0.210219	0.169488	ISG20/RNASEL/EGR1/IRF1/WNT5A/IP6K2/ISG15/ADAR/PTPN2/HSP90AB1/OASL/OAS3/STAT2/IFIT3/ABCE1/CDC37/IRF8/IFNAR1/MAVS/TRIM6/IFITM1	21
GO:0010594	regulation of endothelial cell migration	45/2886	231/18862	0.04942	0.211136	0.170228	SRPX2/NR2F2/SLIT2/THBS1/DLL4/DNAJA4/AGT/ATP2B4/VASH1/HIF1A/FGF18/SPARC/PPARG/ADAMTS9/WNT5A/RHOA/PIK3CD/EPHA2/ZC3H12A/GADD45A/HMOX1/PATZ1/VEGFA/JUP/HDAC5/MAP2K3/RHOB/ATOH8/NR2E1/ANXA1/KLF4/SCARB1/P2RX4/SIRT1/FGFR1/ANGPT2/VEGFC/FBXW7/ZNF580/EMC10/CALR/PLK2/RGCC/STARD13/ETS1	45

## Sheet: BP_DEGs_B.1.1.7
ID	Description	GeneRatio	BgRatio	pvalue	p.adjust	qvalue	geneID	Count
GO:0031331	positive regulation of cellular catabolic process	112/3282	384/18862	6.49999e-09	8.55556e-06	7.05133e-06	RNF128/UBQLN2/DHRSX/SMURF1/EIF2AK4/ARIH1/SNX33/BTG2/PFKFB2/RAB3GAP2/HSP90AA1/SPTLC2/DACT1/HECTD1/MAPK9/LARP1/DTX3L/VGLL4/PRKCD/ARIH2/PFKFB4/FYCO1/ABHD5/ZC3HAV1/IL6/PARK7/TNFRSF1B/PUM1/RNF19B/ZC3H12A/PLK3/FAF1/TMEM59/GBA/RBX1/TNRC6B/CSNK1E/HMOX1/RNF144B/TRIM38/HSPA1A/HSPA1B/CALCOCO2/OSBPL7/ORMDL3/TOB1/TRIB2/SOCS5/UFL1/FOXO3/TNFAIP3/MAP3K7/SPTLC1/TRIM14/TSC1/ABCA2/TPCN1/TMTC3/MDM2/LRP1/GPD1/PRICKLE…	112
GO:0007409	axonogenesis	129/3282	460/18862	6.87194e-09	8.55556e-06	7.05133e-06	PLXNB3/MCF2/EFNB1/HDAC6/USP9X/SLIT2/MAP1A/ISLR2/SEMA7A/SIN3A/TNR/LAMC2/NFASC/ENAH/HSP90AA1/EVL/BCL11B/FLRT2/NUMB/NIN/CDKL3/FSTL4/EFNA5/ALCAM/PLXND1/SEMA3B/DAG1/LAMB2/PLXNB1/SMO/SEMA3C/HOXA2/GLI3/PIK3CD/EPHA2/RAP1GAP/EPHB2/LYPLA2/MACF1/ARTN/NEXN/NGF/NOTCH2/SEMA6C/SEMA4A/IGSF9/CDH2/RNF165/RANBP9/KIAA0319/SRF/VEGFA/HSP90AB1/BAIAP2/ERBB2/NOG/CDK5R1/TRPV2/EFNB3/FBXO45/PAK2/RYK/SHOX2/SKIL/GOLGA4/DPYSL5…	129
GO:0050767	regulation of neurogenesis	102/3282	348/18862	2.3128e-08	1.43972e-05	1.18659e-05	PLXNB3/MCF2/IDH2/GPER1/SRRT/SLIT2/DLL4/PRTG/ISLR2/SEMA7A/TNR/DUSP10/TRIM11/NUMB/NIN/RGS14/CDKL3/FSTL4/PLXND1/PPARG/BHLHE40/SEMA3B/DAG1/PLXNB1/RHEB/SMARCD3/EZH2/SMO/SEMA3C/IL6/GLI3/CAMK2B/HES2/TNFRSF1B/SPEN/EPHB2/MACF1/NGF/SEMA6C/SEMA4A/TSPO/LIF/KIAA0319/DAAM2/CUL7/SRF/TTBK1/VEGFA/NR1D1/HAP1/NOG/TMEM98/CDK5R1/TRPV2/HES7/EFNB3/ASPA/HES1/RYK/FAIM/SHOX2/PRKCI/SKIL/GOLGA4/CX3CR1/TIAM2/UFL1/NR2E1/EPHA7…	102
GO:0051090	regulation of DNA-binding transcription factor activity	123/3282	444/18862	3.29968e-08	1.65918e-05	1.36746e-05	BEX1/RLIM/MBTPS2/TMSB4X/CARD11/BUD31/EIF2AK4/AGT/DHX9/TRAF3/ESR2/FOXA1/NFKBIA/TRIM41/MAPK9/PPARG/IRAK2/BHLHE40/PAXIP1/EZH2/SMO/SRI/FZD1/IL6/PARK7/CTNNBIP1/MAD2L2/ZC3H12A/FAF1/JUN/CTH/BCL10/LAMTOR5/CRTC2/DDR2/HMOX1/RIPK1/TRIM38/TRIM40/TRIM15/TRIM26/HSPA1A/HSPA1B/PIM1/SRF/VEGFA/NFKBIE/PKHD1/CARD14/CDK5RAP3/JUP/FZD2/FOXJ1/FLOT2/LGALS9/UBB/DHX33/HES1/IL1RAP/EOMES/PRKCI/CX3CR1/RPS27A/PELI1/ANXA4/IL18R…	123
GO:0046395	carboxylic acid catabolic process	77/3282	243/18862	3.47546e-08	1.65918e-05	1.36746e-05	QDPR/ECHS1/IVD/SLC27A2/GLUL/NPL/ATP2B4/ALDH6A1/GNPDA1/ALDH7A1/HGD/ALDH1L1/ACOX2/DLD/HIBADH/OGDH/ALDH4A1/HMGCL/MFSD2A/AKR1A1/SCP2/CPT2/ACADM/DDAH1/CPT1B/ENOSF1/ABHD3/ACAA2/ECI2/ALDH5A1/PIPOX/ALDH3A2/ASPA/PCCB/MCCC1/XYLB/NAGK/MCEE/ACOXL/ALDH8A1/AIG1/CNR1/IDNK/SLC27A4/ACADS/SDSL/ACACB/PAH/CSAD/PECR/HNMT/OAT/HOGA1/PHYH/DECR1/AADAT/BDH2/ETFB/CPT1C/AKT2/PRODH2/ILVBL/LONP2/QPRT/ABAT/AMDHD2/ECI1/DECR2/MC…	77
GO:0150104	transport across blood-brain barrier	37/3282	87/18862	3.5641e-08	1.65918e-05	1.36746e-05	SLC16A2/SLC38A5/SLC7A8/SLC29A4/ATP8A1/ATP2B4/SLC12A2/SLC6A6/SLC38A3/MFSD2A/LEPR/SLC6A17/ATP1A4/SLC9A3R1/ABCC3/ATP1B2/SLC5A6/SLC1A1/SLC44A1/SLC27A4/ABCA2/LRP1/KCNJ8/LRP2/SLC1A5/APOE/LRP3/SLC5A5/SLC27A1/INSR/SLC7A5/ABCC1/SLC19A1/SLC5A3/SLC2A10/SLCO2B1/SLC22A8	37
GO:0007224	smoothened signaling pathway	49/3282	131/18862	3.73149e-08	1.65918e-05	1.36746e-05	GPC3/CHSY1/EVC/EVC2/CC2D2A/WDR19/ULK3/GPR161/FOXA1/TXNDC15/ARL13B/IFT57/IFT122/TTC26/SMO/GLI3/PRKACB/IFT27/DCDC2/IFT20/B9D1/HES1/SHOX2/IFT80/IFT172/PTCH1/ROR2/GAS1/SSNA1/TCTN2/TCTN1/GLI1/TULP3/ARMC9/STK36/WDR11/SUFU/HERC4/DLG5/MEGF8/MAP3K10/FKBP8/RPGRIP1L/ZNF423/CREBBP/IFT140/DZIP1/CDON/DYNC2H1	49
GO:0098840	protein transport along microtubule	31/3282	68/18862	6.548e-08	2.47947e-05	2.04353e-05	IFT22/WDR19/MAP1A/IFT43/IFT57/IFT122/TTC26/KIF17/SFPQ/SSX2IP/RABL2B/IFT27/DYNLL2/IFT20/IFT80/WDR35/KIF3C/IFT172/SSNA1/KIF5A/KIF1A/TRAF3IP1/TTC21B/BAG3/KIF5B/BBS12/CLUAP1/IFT140/DYNLRB1/DYNC2H1/DLG2	31
GO:0099118	microtubule-based protein transport	31/3282	68/18862	6.548e-08	2.47947e-05	2.04353e-05	IFT22/WDR19/MAP1A/IFT43/IFT57/IFT122/TTC26/KIF17/SFPQ/SSX2IP/RABL2B/IFT27/DYNLL2/IFT20/IFT80/WDR35/KIF3C/IFT172/SSNA1/KIF5A/KIF1A/TRAF3IP1/TTC21B/BAG3/KIF5B/BBS12/CLUAP1/IFT140/DYNLRB1/DYNC2H1/DLG2	31
GO:0051960	regulation of nervous system development	117/3282	422/18862	6.77124e-08	2.47947e-05	2.04353e-05	PLXNB3/MCF2/IDH2/GPER1/SRRT/SLIT2/DLL4/PRTG/ISLR2/SEMA7A/TNR/DUSP10/TRIM11/FLRT2/NUMB/NIN/RGS14/LRRTM2/CDKL3/FSTL4/PLXND1/PPARG/BHLHE40/SEMA3B/DAG1/PLXNB1/RHEB/SMARCD3/EZH2/SMO/SEMA3C/IL6/GLI3/CAMK2B/HES2/TNFRSF1B/SPEN/EPHB2/MACF1/NGF/SEMA6C/SEMA4A/TYMP/TSPO/LIF/KIAA0319/DAAM2/CUL7/SRF/TTBK1/VEGFA/NR1D1/HAP1/NOG/TMEM98/CDK5R1/TRPV2/HES7/EFNB3/ASPA/HES1/IL1RAP/RYK/FAIM/SHOX2/PRKCI/SKIL/NLGN1/GOLGA…	117
GO:0060271	cilium assembly	109/3282	388/18862	9.07287e-08	3.1377e-05	2.58603e-05	CETN2/HDAC6/IFT22/YWHAG/CC2D2A/WDR19/EHD4/MNS1/CEP350/HSP90AA1/DYNC1H1/IFT43/ABLIM3/TXNDC15/ARL13B/IFT57/ATG3/IQCB1/IFT122/TTLL3/ZMYND10/GALNT11/TTC26/LRGUK/CEP41/BBS9/CROCC/KIF17/SSX2IP/CDC14A/CELSR2/RABL2B/CSNK1E/IFT27/CEP76/TTC39C/DCDC2/PKHD1/CCDC40/DNAH17/HAP1/CCDC103/DNAI2/FOXJ1/DYNLL2/MKS1/IFT20/B9D1/RILP/IFT80/WDR35/KIF3C/DRC1/IFT172/ARMC2/RSPH4A/AHI1/KIF27/CEP78/DNAI1/GSN/SSNA1/TCTN2/RILP…	109
GO:1903829	positive regulation of cellular protein localization	87/3282	295/18862	1.80837e-07	5.92478e-05	4.88309e-05	GPER1/YWHAG/MAP1A/SNX33/ABHD17C/CEMIP/ATP2B4/TP53BP2/PARP1/SQSTM1/ABLIM3/PARP9/DTX3L/PRKCD/GNL3/ARIH2/SMO/TOMM7/GLI3/EGFR/CCT6A/UBE2J2/PARK7/EPHA2/CROCC/EPHB2/ZC3H12A/LEPROT/LAMTOR5/PDZK1/MGAT3/CARD10/LIF/UBE2L3/BID/MTCL1/PMAIP1/HSPA1L/HSP90AB1/USP36/CDK5RAP3/ERBB2/ORMDL3/JUP/CDK5R1/TFDP2/PRKCI/PRKCE/CCT4/EIF2AK3/TCP1/STOM/RAN/LRP1/C2CD5/MFF/VIL1/BAG3/SORBS1/ANK3/KIF5B/UBR5/YWHAZ/FBXW7/BBC3/AKT2/…	87
GO:0033157	regulation of intracellular protein transport	76/3282	248/18862	1.97531e-07	6.14815e-05	5.06719e-05	GRIPAP1/YWHAG/OAZ2/CEMIP/SEC16B/RAB29/YOD1/PTPN14/TP53BP2/ABLIM3/PRKCD/ARIH2/INSIG1/SMO/TOMM7/GLI3/UBE2J2/PARK7/ATP13A2/ZC3H12A/PLK3/LEPROT/PDZK1/RANGAP1/UBE2L3/BID/MTCL1/PMAIP1/HSPA1L/HSP90AB1/USP36/ERBB2/JUP/CDK5R1/TFDP2/PARL/SLC1A1/STOM/RAN/CABP1/CEP290/OS9/LRRK2/C2CD5/SP100/MFF/TTC21B/BAG3/TCF7L2/SUFU/ANK3/KIF5B/UBR5/YWHAZ/BNIP3L/DMTN/FBXW7/NUCB1/BBC3/AKT2/PIK3R2/UBL5/CSNK2A2/ITGAM/GAS6/XPO4/…	76
GO:0010506	regulation of autophagy	94/3282	328/18862	2.55481e-07	6.93743e-05	5.7177e-05	UBQLN2/HDAC6/DHRSX/LAMTOR4/EIF2AK4/BMF/NEDD4/HERC1/ABL2/QSOX1/RAB3GAP2/SPTLC2/ATP6V0E1/LARP1/ITPR1/FYCO1/PRKAG2/RHEB/ATP6V0E2/EXOC4/PARK7/ATP13A2/ZC3H12A/PLK3/TMEM59/LEPR/LAMTOR5/DRAM2/GBA/LAMTOR2/TSPO/HMOX1/DEPDC5/MTCL1/NPC1/TRIM38/USP36/CALCOCO2/OSBPL7/ORMDL3/GFAP/TLK2/ERN1/CDK5R1/EIF4G1/ATP6V1E2/TMEM150A/UFL1/FOXO3/MAP3K7/SPTLC1/ACER2/TRIM14/TSC1/TPCN1/DRAM1/DDIT3/ATG101/LRRK2/SH3BP4/BNIP3/BAG…	94
GO:0044782	cilium organization	112/3282	409/18862	2.56323e-07	6.93743e-05	5.7177e-05	CETN2/HDAC6/IFT22/YWHAG/CC2D2A/WDR19/EHD4/MNS1/CEP350/HSP90AA1/DYNC1H1/IFT43/ABLIM3/TXNDC15/ARL13B/IFT57/ATG3/IQCB1/IFT122/TTLL3/ZMYND10/GALNT11/TTC26/LRGUK/CEP41/BBS9/CROCC/KIF17/SSX2IP/CDC14A/CELSR2/RABL2B/CSNK1E/IFT27/CEP76/TTC39C/DCDC2/PKHD1/CCDC40/DNAH17/HAP1/CCDC103/DNAI2/SLC9A3R1/FOXJ1/DYNLL2/MKS1/IFT20/B9D1/RILP/IFT80/WDR35/KIF3C/DRC1/IFT172/ARMC2/RSPH4A/AHI1/KIF27/CEP78/DNAI1/GSN/SSNA1/T…	112
GO:0006120	mitochondrial electron transport, NADH to ubiquinone	26/3282	55/18862	3.06406e-07	7.9474e-05	6.55009e-05	ND6/ND5/ND4/ND4L/ND3/ND2/ND1/NDUFB11/NDUFA2/NDUFA5/DLD/NDUFA4/PARK7/NDUFA6/NDUFB5/NDUFA8/NDUFA10/NDUFB8/NDUFC1/NDUFA13/NDUFB7/NDUFA7/NDUFB10/NDUFS4/NDUFC2/NDUFV1	26
GO:0035735	intraciliary transport involved in cilium assembly	21/3282	40/18862	4.59807e-07	0.000114492	9.43622e-05	IFT22/WDR19/IFT43/IFT57/IFT122/TTC26/KIF17/SSX2IP/IFT27/DYNLL2/IFT20/IFT80/WDR35/KIF3C/IFT172/TRAF3IP1/TTC21B/CLUAP1/IFT140/DYNLRB1/DYNC2H1	21
GO:1903533	regulation of protein targeting	33/3282	81/18862	6.38963e-07	0.000142055	0.000117079	CEMIP/ABLIM3/ARIH2/TOMM7/UBE2J2/LEPROT/PDZK1/UBE2L3/MTCL1/HSPA1L/USP36/ERBB2/CDK5R1/PARL/SLC1A1/STOM/LRRK2/C2CD5/MFF/BAG3/ANK3/BNIP3L/DMTN/FBXW7/NUCB1/AKT2/UBL5/CSNK2A2/ITGAM/ITGB2/PRNP/KCNB1/PAK1	33
GO:0006605	protein targeting	117/3282	441/18862	8.20721e-07	0.0001703	0.000140358	AIFM1/USP9X/SMURF1/YWHAG/VPS37D/SRP14/SLC27A2/NEDD4/RPLP1/CEMIP/ADORA1/HSP90AA1/LTBP2/ABLIM3/HSPA4/ATG3/ACOX2/SPCS1/ARIH2/GSTK1/AGK/EXOC4/TOMM7/NACAD/UBE2J2/PEX10/ICMT/RPL11/HMGCL/SCP2/LEPROT/PDZK1/SSR2/PEX19/SAMM50/TSPO/SYNGR1/UBE2L3/BID/MTCL1/ECI2/HSPA1L/RPS10/PEX6/TRAM2/USP36/RPL23/ERBB2/HAP1/RPL27/CDK5R1/PIPOX/UBB/RPL35A/RTP2/PRKCI/NLGN1/PARL/RPSA/RPS27A/MAN1A1/RPS12/SLC1A1/ZDHHC21/STOM/RPL35…	117
GO:0046718	viral entry into host cell	48/3282	140/18862	1.04152e-06	0.000202626	0.000167	ANPEP/CD46/TRIM11/SLC10A1/HYAL1/DAG1/EGFR/EPHA2/F11R/LGALS1/NPC1/NUP153/TRIM38/TRIM10/TRIM26/HSPA1A/HSPA1B/PHB/LGALS9/EFNB3/PLSCR1/PTX3/RPSA/HS3ST5/TRIM14/GSN/SCARB1/SELPLG/DPP4/MRC1/LY6E/SLC20A2/SCARB2/SLC1A5/PVR/AXL/LDLR/BSG/GAS6/EFNB2/KPNA3/UVRAG/TRIM6/TRIM5/SMPD1/TPCN2/CD81/IFITM1	48
GO:0030900	forebrain development	98/3282	357/18862	1.25156e-06	0.000236091	0.000194581	SLIT2/SEMA7A/SIN3A/TNR/BTG2/ATP2B4/SRGAP2/BCL11B/NUMB/SLC8A3/NIN/ARL13B/SETD2/EZH2/CNTNAP2/SMO/FOXP2/LAMB1/AQP1/INHBA/GLI3/CHD5/EPHB2/MFSD2A/GNG12/WNT7B/SSTR3/TWSG1/CDH2/SRF/EFHC1/HAP1/EZH1/NOG/CDK5R1/UBB/KDM6B/ATP1B2/FBXO45/HES1/RYK/SOX2/TRA2B/NR2E1/AGTPBP1/TSC1/TBX3/TCTN1/SCYL2/APAF1/GLI1/LRP1/LRRK2/KIF1A/GBX2/CREB1/DLX1/LRP2/TBR1/NR4A2/BNIP3/FGF8/DPCD/PRKG1/KIF5B/CHD7/DLC1/RAPGEF2/SLC7A11/PITX…	98
GO:1901798	positive regulation of signal transduction by p53 class mediator	14/3282	22/18862	1.7834e-06	0.000326519	0.000269111	SPRED1/CHD5/RPL11/PMAIP1/CDK5RAP3/RPL23/HEXIM1/DDX5/UBB/SPRED2/ZNF385A/PLA2R1/ANKRD1/ATM	14
GO:0042073	intraciliary transport	24/3282	53/18862	2.28596e-06	0.00039528	0.000325782	IFT22/WDR19/IFT43/IFT57/IFT122/TTC26/KIF17/SSX2IP/RABL2B/IFT27/DYNLL2/IFT20/IFT80/WDR35/KIF3C/IFT172/SSNA1/TRAF3IP1/TTC21B/BBS12/CLUAP1/IFT140/DYNLRB1/DYNC2H1	24
GO:0021532	neural tube patterning	18/3282	34/18862	2.60876e-06	0.000427357	0.000352219	ATP6AP2/WDR19/GPR161/FOXA1/ARL13B/SMO/GLI3/PRKACB/HES1/PTCH1/TCTN1/TULP3/GBX2/SUFU/FGF8/FKBP8/RPGRIP1L/IFT140	18
GO:0097485	neuron projection guidance	79/3282	278/18862	3.19249e-06	0.000484714	0.000399492	PLXNB3/EFNB1/SLIT2/SEMA7A/TNR/LAMC2/NFASC/ENAH/EVL/BCL11B/FLRT2/EFNA5/ALCAM/PLXND1/SEMA3B/DAG1/LAMB2/PLXNB1/SMO/SEMA3C/HOXA2/GLI3/PIK3CD/EPHA2/RAP1GAP/EPHB2/LYPLA2/ARTN/NEXN/NOTCH2/SEMA6C/SEMA4A/IGSF9/RNF165/RANBP9/VEGFA/ERBB2/NOG/CDK5R1/EFNB3/RYK/DPYSL5/B3GNT2/EPHA7/PTCH1/TMEFF1/NTN4/KIF5A/LRP1/PTPRO/GBX2/KLF7/TBR1/DPYSL4/GFRA1/FGF8/EGR2/KIF5B/DPYSL2/PALLD/UNC5C/VASP/MEGF8/ZSWIM4/BSG/DOK4/MAPK3/…	79
GO:0090316	positive regulation of intracellular protein transport	56/3282	179/18862	3.77761e-06	0.000542686	0.000447272	YWHAG/OAZ2/CEMIP/SEC16B/RAB29/TP53BP2/ABLIM3/PRKCD/ARIH2/SMO/TOMM7/GLI3/UBE2J2/ZC3H12A/PLK3/LEPROT/PDZK1/UBE2L3/BID/MTCL1/PMAIP1/HSPA1L/HSP90AB1/USP36/ERBB2/JUP/CDK5R1/TFDP2/STOM/RAN/CEP290/C2CD5/MFF/BAG3/TCF7L2/ANK3/KIF5B/UBR5/YWHAZ/FBXW7/BBC3/AKT2/PIK3R2/UBL5/CSNK2A2/ITGAM/GAS6/XPO4/ITGB2/TM9SF4/MAVS/PRNP/KCNB1/PAK1/B3GAT3/CD81	56
GO:0007050	cell cycle arrest	69/3282	235/18862	3.83586e-06	0.000542686	0.000447272	HMGN5/FOXO4/GPER1/LAMTOR4/FZD9/ZBTB49/APBB2/THBS1/EIF2AK4/BTG2/MDM4/TGFB2/VASH1/DUSP1/CDC25C/IRF1/PCBP4/PRKAG2/RHEB/CASP2/CNOT4/KMT2E/INHBA/SLC25A33/ZBTB17/PLK3/CDKN2C/GADD45A/CDC14A/LAMTOR5/NOTCH2/MUC1/LAMTOR2/MAPK12/MIF/CDKN1A/HSP90AB1/RPL23/ERN1/CDK5R1/TFDP2/IL12A/SKIL/SOX2/PPM1G/MSH2/GAS1/E2F7/MDM2/DDIT3/ZNF385A/STRADB/TCF7L2/KLLN/MYC/CNOT7/CXCL8/AKT2/ARID3A/E2F4/RBL2/PLK2/POU4F1/RGCC/PRNP/AT…	69
GO:0031396	regulation of protein ubiquitination	62/3282	205/18862	4.08801e-06	0.000565509	0.000466081	DDX3X/ARRDC4/RNF111/MTA1/HSP90AA1/OTUB2/MAPK9/SQSTM1/PRR7/NDFIP1/CAMLG/CBLB/DTX3L/PAXIP1/ISG15/PARK7/MAD2L2/RPL11/BCL10/TSPO/RBX1/RASD2/UBE2L3/HSPA1A/HSPA1B/DAXX/HSP90AB1/CDK5RAP3/RPL23/UBB/NXN/SIAH2/PRKCE/PELI1/UFL1/TNFAIP3/TOPORS/DNAJA1/CRY1/PRICKLE1/LRRK2/PER2/TRIP12/BMI1/GTPBP4/PARP10/UBR5/RIPK2/FBXW7/UBE2S/PRKCG/DCUN1D3/AXIN1/ARRDC3/RNF180/CDC20B/NDFIP2/MYCBP2/FKBP1A/TRIB3/ARRB1/CTR9	62
GO:0072331	signal transduction by p53 class mediator	75/3282	263/18862	4.87176e-06	0.000622785	0.000513288	RPS6KA6/AEN/SPRED1/BTG2/MDM4/DYRK3/TP53BP2/BDKRB2/CDC25C/BRPF1/PCBP4/ATRIP/PAXIP1/PRKAG2/CASP2/CNOT4/CHD5/RPL11/PLK3/GADD45A/MUC1/MIF/RBBP8/TAF4B/PMAIP1/CDKN1A/CDK5RAP3/RPL23/HEXIM1/DDX5/PDK2/BRIP1/PPM1D/CDK5R1/UBB/RFC4/TFDP2/MSH2/SPRED2/HNRNPK/ACER2/TOPORS/TAF1L/NUAK1/E2F7/MDM2/ZNF385A/CHD4/NOP2/SP100/PLA2R1/ANKRD1/DNA2/DDIT4/TAF3/NDRG1/KAT6A/CNOT7/PPP1R13L/ARID3A/WWOX/E2F4/CSNK2A2/RBL2/PLK2/POU…	75
GO:0032388	positive regulation of intracellular transport	65/3282	219/18862	4.87278e-06	0.000622785	0.000513288	YWHAG/NEDD4/OAZ2/CEMIP/SEC16B/DHX9/RAB29/TP53BP2/DYNC1H1/ABLIM3/PRKCD/ARIH2/SMO/TOMM7/GLI3/UBE2J2/LDLRAP1/ZC3H12A/PLK3/SCP2/LEPROT/PDZK1/MLC1/UBE2L3/BID/MTCL1/PMAIP1/HSPA1L/HSP90AB1/USP36/ERBB2/JUP/CDK5R1/TFDP2/STOM/RAN/CEP290/C2CD5/CAPN10/MFF/BAG3/TCF7L2/ANK3/KIF5B/UBR5/YWHAZ/FBXW7/BBC3/AKT2/PIK3R2/UBL5/CSNK2A2/ITGAM/DAB2/GAS6/XPO4/ITGB2/TM9SF4/MAVS/PRNP/KCNB1/FEZ1/PAK1/B3GAT3/CD81	65
GO:0010975	regulation of neuron projection development	111/3282	428/18862	4.90492e-06	0.000622785	0.000513288	PLXNB3/MCF2/STYXL1/SLIT2/LTK/NEDD4/ISLR2/SEMA7A/TNR/ABL2/RGS2/CAMSAP2/RAB29/NIN/FBXO38/SPOCK1/CDKL3/FSTL4/PLXND1/SEMA3B/PLXNB1/EZH2/CREB3L2/SEMA3C/FZD1/HECW1/CAMK2B/EPHB2/MACF1/MFSD2A/NGF/SEMA6C/SEMA4A/LGALS1/KREMEN1/CDH2/KIAA0319/CUL7/SRF/VEGFA/GRN/TANC2/CDK5R1/SARM1/TRPV2/EFNB3/ATP1B2/SCARF1/PAK2/RYK/SHOX2/PRKCI/SKIL/TNIK/NLGN1/DGKG/GOLGA4/TIAM2/NR2E1/FUT9/EPHA7/CNR1/ROR2/KANK1/KLF4/TSC1/TRPV4/…	111
GO:0007411	axon guidance	78/3282	277/18862	5.3309e-06	0.00063817	0.000525967	PLXNB3/EFNB1/SLIT2/SEMA7A/TNR/LAMC2/NFASC/ENAH/EVL/BCL11B/FLRT2/EFNA5/ALCAM/PLXND1/SEMA3B/DAG1/LAMB2/PLXNB1/SMO/SEMA3C/HOXA2/GLI3/PIK3CD/EPHA2/RAP1GAP/EPHB2/LYPLA2/ARTN/NEXN/NOTCH2/SEMA6C/SEMA4A/IGSF9/RNF165/RANBP9/VEGFA/ERBB2/NOG/CDK5R1/EFNB3/RYK/DPYSL5/B3GNT2/EPHA7/PTCH1/TMEFF1/NTN4/KIF5A/LRP1/PTPRO/GBX2/KLF7/TBR1/GFRA1/FGF8/EGR2/KIF5B/DPYSL2/PALLD/UNC5C/VASP/MEGF8/ZSWIM4/BSG/DOK4/MAPK3/FOXD1/Z…	78
GO:0071897	DNA biosynthetic process	59/3282	194/18862	5.7059e-06	0.000657763	0.000542116	HNRNPC/TEP1/NOP10/DTL/CENPF/HSP90AA1/TINF2/NHP2/FGFR4/DUSP1/LOX/POLQ/PPARG/POT1/DNAJC2/POLM/POLD2/CCT6A/ISG15/MAD2L2/POLI/CDKN1A/HSP90AB1/TK1/PHB/POLG2/UBB/RFC4/RPS27A/CCT4/POLE4/TCP1/REV3L/GJA1/KLF4/UBC/POLL/TNKS2/ANKRD1/PARP10/MYC/TERF1/HNRNPD/PARM1/SMPD3/TK2/MAPK3/SH2B1/PARN/CCT5/TERT/DACH1/RGCC/CCT8/ATM/POLD3/NAT10/UBE2L6/POLD4	59
GO:0008589	regulation of smoothened signaling pathway	30/3282	77/18862	6.04067e-06	0.000683694	0.000563487	GPC3/CHSY1/EVC/ULK3/GPR161/FOXA1/TXNDC15/IFT122/SMO/GLI3/PRKACB/DCDC2/SHOX2/IFT172/PTCH1/GAS1/TCTN1/GLI1/TULP3/ARMC9/STK36/WDR11/SUFU/HERC4/DLG5/MEGF8/RPGRIP1L/CREBBP/IFT140/DYNC2H1	30
GO:0030033	microvillus assembly	11/3282	16/18862	8.03941e-06	0.000871863	0.000718573	RAPGEF6/PODXL/ESPN/RAP1GAP/ATP8B1/SLC9A3R1/TNIK/PLD1/RAPGEF2/FXYD5/KLF5	11
GO:0045862	positive regulation of proteolysis	97/3282	367/18862	8.2215e-06	0.000871863	0.000718573	AIFM1/UBQLN2/DDX3X/MMP14/GPER1/SMURF1/CLDN4/CLN6/ARIH1/SNX33/CTSH/LGMN/HECTD1/MAPK9/PRR7/F12/FGFR4/FBXW11/IFT57/FAM162A/PPARG/ARIH2/CASP2/AURKAIP1/TNFRSF1B/LCK/RNF19B/ZC3H12A/PLK3/BCL10/F3/NGF/GBA/NCSTN/MAPK12/FBLN1/RBX1/CSNK1E/TBC1D10A/PPM1F/BID/BCL2L13/PMAIP1/RIPK1/RNF144B/HSPA1A/HSPA1B/TTBK1/OSBPL7/GRN/LGALS9/TRIB2/WDR35/SOCS5/PSME4/ANTXR1/EIF2AK3/SLC1A1/ACER2/TNFSF15/TRIM32/GSN/APAF1/TMTC3/MD…	97
GO:0021537	telencephalon development	67/3282	231/18862	8.26344e-06	0.000871863	0.000718573	SLIT2/SEMA7A/TNR/BTG2/ATP2B4/SRGAP2/BCL11B/NUMB/SLC8A3/NIN/ARL13B/EZH2/CNTNAP2/SMO/FOXP2/LAMB1/AQP1/INHBA/GLI3/EPHB2/MFSD2A/GNG12/CDH2/SRF/EFHC1/EZH1/CDK5R1/KDM6B/ATP1B2/FBXO45/HES1/RYK/TRA2B/NR2E1/AGTPBP1/TSC1/TCTN1/LRP1/LRRK2/DLX1/TBR1/BNIP3/FGF8/DPCD/KIF5B/CHD7/SLC7A11/UBA6/MBOAT7/ATF5/WDR62/PTPRS/CSNK2A2/BBS2/RPGRIP1L/ZSWIM6/DNAH5/SLITRK5/GART/XRN2/BTBD3/BMP2/PLCB1/CDON/FEZ1/DIXDC1/TSKU	67
GO:0060562	epithelial tube morphogenesis	84/3282	309/18862	1.04599e-05	0.00104464	0.000860973	GPC3/MMP14/SLIT2/DLL4/CTSH/KIF26B/AGT/KDM5B/TGFB2/SIX4/FOXA1/IFT57/IFT122/PLXND1/DAG1/SETD2/PODXL/SMO/RALA/GLI3/PIK3CD/CTNNBIP1/MTHFR/EPHA2/LUZP1/TACSTD2/PRKACB/BCL10/RBM15/NOTCH2/CECR2/NOTCH4/BRD2/SRF/VEGFA/PKHD1/CCDC40/TBX21/TCAP/FZD2/CCDC103/NOG/HES1/EOMES/RHOB/IFT172/AHI1/EPHA7/PTCH1/TSC1/NRARP/TBX3/TCTN1/APAF1/CEP290/PRICKLE1/TULP3/GBX2/LRP2/TBR1/SUFU/FGF8/DLG5/FOXH1/MYC/RSPO2/FZD6/DLC1/NPNT…	84
GO:0042176	regulation of protein catabolic process	100/3282	383/18862	1.04827e-05	0.00104464	0.000860973	F8A1/GPC3/RNF128/UBQLN2/TIMP1/SMURF1/MAP1A/NEDD4/OAZ2/ARIH1/SNX33/TMEM9/MDM4/DTL/HSP90AA1/DACT1/STYX/HECTD1/MAPK9/NDFIP1/CAMLG/CBLB/TIMP4/VGLL4/RYBP/ARIH2/HECW1/EGFR/PARK7/MAD2L2/TNFRSF1B/ATP13A2/RPL11/RNF19B/PLK3/FAF1/GBA/RBX1/MGAT3/CSNK1E/RNF144B/TRIM40/HSPA1A/HSPA1B/HSP90AB1/TIMP2/PHB/SNF8/CDK5RAP3/OSBPL7/RPL23/GFAP/TLK2/SMURF2/UBB/RILP/TIPARP/ODC1/TRIB2/ATRAID/SOCS5/XPO1/UFL1/GJA1/TNFAIP3/TRI…	100
GO:1903320	regulation of protein modification by small protein conjugation or removal	68/3282	237/18862	1.05723e-05	0.00104464	0.000860973	DDX3X/ARRDC4/RNF111/MTA1/HSP90AA1/OTUB2/MAPK9/SQSTM1/PRR7/NDFIP1/EGR1/CAMLG/CBLB/DTX3L/GNL3/PAXIP1/ISG15/PARK7/MAD2L2/RPL11/ZC3H12A/BCL10/TSPO/RBX1/RASD2/UBE2L3/HSPA1A/HSPA1B/DAXX/HSP90AB1/CDK5RAP3/RPL23/UBB/NXN/SIAH2/PRKCE/EPAS1/PELI1/UFL1/TNFAIP3/TOPORS/DNAJA1/CRY1/PRICKLE1/LRRK2/PER2/TRIP12/BMI1/GTPBP4/PARP10/UBR5/RIPK2/FBXW7/OTUD4/UBE2S/PRKCG/UBA2/DCUN1D3/AXIN1/ARRDC3/RNF180/CDC20B/NDFIP2/MYC…	68
GO:0030330	DNA damage response, signal transduction by p53 class mediator	37/3282	106/18862	1.08456e-05	0.0010549	0.000869431	RPS6KA6/SPRED1/BTG2/MDM4/DYRK3/CDC25C/PCBP4/PAXIP1/CASP2/CNOT4/PLK3/GADD45A/MUC1/MIF/PMAIP1/CDKN1A/DDX5/PPM1D/TFDP2/SPRED2/ACER2/E2F7/MDM2/ZNF385A/SP100/PLA2R1/ANKRD1/NDRG1/CNOT7/ARID3A/E2F4/RBL2/PLK2/RGCC/DYRK1A/ATM/PIDD1	37
GO:0001933	negative regulation of protein phosphorylation	95/3282	362/18862	1.38333e-05	0.00129054	0.00106364	DUSP9/YWHAG/SLIT2/SPRED1/SMAD6/AGT/RGS2/PPP1R15B/DUSP10/BDKRB2/SLC8A3/RGS14/DUSP1/SPRY4/PPP2CA/CBLB/PARP14/PRKCD/PRKAG2/PARK7/ERRFI1/EPHB2/ZC3H12A/CDKN2C/GADD45A/GBA/FBLN1/PPM1F/CDKN1A/PPP2R5D/CD109/CDK5RAP3/HEXIM1/CD300A/SPAG9/NOG/GGNBP2/DUSP14/SUZ12/PAK2/EIF4G1/TRIB2/EMILIN1/SOCS5/SPRED2/NCK2/CNKSR3/TNFAIP3/GNAQ/DNAJA1/SH2B3/DUSP6/PTPRQ/LRRK2/STRAP/PTPRO/DUSP16/TRAF3IP1/PDCD4/DUSP5/ITPRIP/DKK1/…	95
GO:0050769	positive regulation of neurogenesis	63/3282	217/18862	1.46553e-05	0.00132629	0.0010931	PLXNB3/GPER1/SRRT/SLIT2/ISLR2/SEMA7A/NUMB/NIN/RGS14/CDKL3/PLXND1/PPARG/DAG1/PLXNB1/RHEB/SMARCD3/SMO/IL6/GLI3/CAMK2B/TNFRSF1B/SPEN/EPHB2/MACF1/NGF/TSPO/LIF/CUL7/SRF/TTBK1/VEGFA/HAP1/TRPV2/ASPA/HES1/FAIM/SHOX2/PRKCI/SKIL/GOLGA4/CX3CR1/TIAM2/UFL1/TRIM32/LRP1/OBSL1/FN1/LRP2/EGR2/MEGF8/EEF2K/METRN/OTP/MAP1B/TIAM1/BMP2/ZNF335/CDH4/PAK1/MAP6/RASSF10/BDNF/CAPRIN1	63
GO:0042119	neutrophil activation	124/3282	500/18862	1.4701e-05	0.00132629	0.0010931	CFP/DDX3X/ATP6AP2/PRDX4/PNP/ANPEP/GUSB/PGM2/ATP8A1/SRP14/SNAP23/SLC27A2/CTSH/CREG1/QSOX1/NFASC/PIGR/TMEM63A/HSP90AA1/DYNC1H1/SERPINA1/NPC2/RAB24/STK10/CYSTM1/NIT2/PRKCD/APEH/PTPRN2/MGAM/KMT2E/KCNAB2/TNFRSF1B/UBR4/DDOST/FUCA1/AGL/LAMTOR2/NCSTN/HSPA6/ARSA/SYNGR1/MIF/RAB31/SERPINB6/HSPA1A/HSPA1B/RAB44/HSP90AB1/GAA/TIMP2/KPNB1/ORMDL3/JUP/ACLY/GHDC/GRN/CD300A/KCMF1/GLB1/GYG1/PTX3/PLD1/IL18RAP/RNASET2/…	124
GO:1901605	alpha-amino acid metabolic process	57/3282	191/18862	1.51949e-05	0.00135126	0.00111368	QDPR/GLUL/ATP2B4/GFPT2/ALDH7A1/NIT2/HGD/DLD/OGDH/PARK7/MTHFR/AGMAT/ALDH4A1/CTPS1/CTH/DDAH1/PHGDH/ATF4/MPST/TST/ALDH5A1/PIPOX/ASPA/SRR/PLOD2/GMPS/ADI1/ODC1/THNSL2/IYD/ALDH8A1/SDSL/PAH/NR1H4/CSAD/OAT/ACADSB/HOGA1/AZIN1/MSRA/AADAT/SLC7A11/SLC39A8/ENOPH1/MTHFD2L/PRODH2/ILVBL/SERINC5/FTCD/CBS/GART/AHCY/HNF4A/SERINC3/ACAT1/GLYAT/ASRGL1	57
GO:0010508	positive regulation of autophagy	40/3282	120/18862	1.71128e-05	0.00150038	0.00123658	DHRSX/EIF2AK4/RAB3GAP2/SPTLC2/LARP1/FYCO1/PARK7/ZC3H12A/PLK3/TMEM59/HMOX1/TRIM38/CALCOCO2/ORMDL3/UFL1/FOXO3/MAP3K7/SPTLC1/TRIM14/TSC1/TPCN1/LRRK2/SH3BP4/BNIP3/BAG3/WAC/OPTN/MTDH/RIPK2/BNIP3L/SCOC/MAPK3/MEFV/PLK2/FOXO1/UVRAG/TRIM6/TRIM5/PIK3C2A/SVIP	40
GO:0021915	neural tube development	46/3282	145/18862	1.79424e-05	0.00155127	0.00127853	ATP6AP2/WDR19/GPR161/TGFB2/DACT1/FOXA1/ARL13B/IFT57/IFT122/SETD2/SMO/SEMA3C/RALA/GLI3/MTHFR/EPHA2/LUZP1/PRKACB/BCL10/PHGDH/CECR2/BRD2/FZD2/NOG/HES1/IFT172/PTCH1/TSC1/TCTN1/APAF1/PRICKLE1/TULP3/GBX2/LRP2/SUFU/FGF8/FZD6/DLC1/SHROOM3/VASP/FKBP8/ZNF358/RPGRIP1L/IFT140/DCHS1/ADM	46
GO:0007249	I-kappaB kinase/NF-kappaB signaling	77/3282	282/18862	2.02461e-05	0.00170313	0.00140369	TSPAN6/PRDX4/CARD11/TRAF3/NFKBIA/SQSTM1/NDFIP1/TFG/IRAK2/TMED4/ZC3H12A/MIER1/CTH/BCL10/LAMTOR5/ASH1L/LGALS1/HMOX1/RIOK3/RIPK1/TRIM38/SLC35B2/SECTM1/NR1D1/TMEM101/LGALS9/UBB/PER1/FAIM/CX3CR1/DDX1/PRKCE/RPS27A/REL/PELI1/SLC20A1/UFL1/GJA1/TNFAIP3/MAP3K7/IRAK1BP1/LURAP1L/TRIM14/TRIM32/TRAF1/UBC/NR1H4/TNFRSF1A/DDX21/OPTN/SHARPIN/MTDH/RIPK2/IKBKB/TNFRSF10B/TLR3/ALPK1/ANKRD17/NLRP12/IRF3/CARD8/RELB/BRD4…	77
GO:0019395	fatty acid oxidation	36/3282	105/18862	2.22177e-05	0.00181582	0.00149656	ECHS1/IVD/SLC27A2/PPARG/ACOX2/PRKAG2/PDK4/MFSD2A/SCP2/CPT2/ACADM/CPT1B/ACAA2/ECI2/ALDH3A2/ACOXL/CNR1/NR4A3/ACADS/ACACB/APPL2/PECR/PHYH/DECR1/BDH2/ADH5/ETFB/CPT1C/AKT2/ILVBL/LONP2/ECI1/DECR2/AMACR/ACAT1/DGAT2	36
GO:0043312	neutrophil degranulation	120/3282	485/18862	2.24607e-05	0.00181582	0.00149656	CFP/DDX3X/ATP6AP2/PRDX4/PNP/ANPEP/GUSB/PGM2/ATP8A1/SRP14/SNAP23/SLC27A2/CTSH/CREG1/QSOX1/NFASC/PIGR/TMEM63A/HSP90AA1/DYNC1H1/SERPINA1/NPC2/RAB24/STK10/CYSTM1/NIT2/PRKCD/APEH/PTPRN2/MGAM/KCNAB2/TNFRSF1B/UBR4/DDOST/FUCA1/AGL/LAMTOR2/NCSTN/HSPA6/ARSA/SYNGR1/MIF/RAB31/SERPINB6/HSPA1A/HSPA1B/RAB44/HSP90AB1/GAA/TIMP2/KPNB1/ORMDL3/JUP/ACLY/GHDC/GRN/CD300A/KCMF1/GLB1/GYG1/PTX3/PLD1/RNASET2/ERP44/GSN/STOM…	120
GO:0042063	gliogenesis	77/3282	283/18862	2.31443e-05	0.00182371	0.00150307	MMP14/IDH2/SRGAP2/TGFB2/DUSP10/SLC8A3/HDAC11/PPARG/DAG1/LAMB2/RHEB/EZH2/SMO/LAMB1/IL6/GLI3/EGFR/MXRA8/TNFRSF1B/CDKN2C/LEPR/TSPAN2/PHGDH/GBA/NCSTN/HDAC10/TSPO/LIF/CDH2/DAAM2/TTBK1/ERBB2/NR1D1/GRN/ITGB4/NOG/TMEM98/CDK5R1/ATP1B2/ASPA/HES1/P2RY1/PRKCI/SOX2/CX3CR1/UFL1/NR2E1/ROR2/GSN/ABCA2/EIF2B1/P2RX4/LRP1/ERBB3/CREB1/DLX1/LRP2/BNIP3/EGR2/PARD3/NDRG1/ARHGEF10/MBOAT7/C5AR1/PRX/AKT2/SIRT2/LDLR/EEF2/MAP…	77
GO:1901653	cellular response to peptide	100/3282	391/18862	2.61446e-05	0.00198476	0.0016358	LDOC1/FOXO4/GPER1/BAIAP2L1/YWHAG/CPEB2/KLF3/PARP1/LGMN/TSHR/TRIM41/ATP6V0E1/PPARG/PRKCD/GNAI2/INSIG1/ATP6V0E2/ATP6V0A4/AKR1B1/PDK4/IGFBP1/ERRFI1/SLC25A33/AGTRAP/WDTC1/PIK3R3/LEPROT/PRKACB/BCAR3/VCAM1/PKLR/RANGAP1/XBP1/RAB31/BAIAP2/RPL23/CDC6/CRHR1/PDK2/BRIP1/PRKCI/KLF11/ADCY3/ATP6V1E2/RHOQ/ARID1B/GJA1/KANK1/NR4A3/KLF4/SLC27A4/TSC1/APPL2/NR1H4/SOCS2/MDM2/LRP1/STAT6/NR4A1/ADCY6/C2CD5/DDX11/CAPN10/C…	100
GO:1904350	regulation of protein catabolic process in the vacuole	8/3282	10/18862	2.68602e-05	0.00200143	0.00164954	RNF128/ATP13A2/GBA/MGAT3/LRP1/LRP2/LDLR/CD81	8
GO:0034440	lipid oxidation	37/3282	110/18862	2.78367e-05	0.00203863	0.0016802	ECHS1/IVD/SLC27A2/PPARG/ACOX2/PRKAG2/PDK4/MFSD2A/SCP2/CPT2/ACADM/CPT1B/ACAA2/ECI2/ALDH3A2/ALOX12B/ACOXL/CNR1/NR4A3/ACADS/ACACB/APPL2/PECR/PHYH/DECR1/BDH2/ADH5/ETFB/CPT1C/AKT2/ILVBL/LONP2/ECI1/DECR2/AMACR/ACAT1/DGAT2	37
GO:0010970	transport along microtubule	48/3282	156/18862	2.91874e-05	0.00206468	0.00170167	IFT22/WDR19/MAP1A/DYNC1H1/IFT43/FBXW11/IFT57/COPG1/IFT122/FYCO1/TTC26/KIF17/SFPQ/SSX2IP/RABL2B/IFT27/BLOC1S5/DST/HAP1/DYNLL2/IFT20/UBB/KIF1C/IFT80/WDR35/KIF3C/IFT172/SSNA1/KIF5A/KIF1A/TRAF3IP1/DYNC1I2/TTC21B/BAG3/KIF5B/ARHGAP21/SYBU/BBS12/KLC3/MAP1S/CLUAP1/IFT140/MAP1B/DYNLRB1/FEZ1/HSPA8/DYNC2H1/DLG2	48
GO:0002283	neutrophil activation involved in immune response	120/3282	488/18862	3.01774e-05	0.00208727	0.00172029	CFP/DDX3X/ATP6AP2/PRDX4/PNP/ANPEP/GUSB/PGM2/ATP8A1/SRP14/SNAP23/SLC27A2/CTSH/CREG1/QSOX1/NFASC/PIGR/TMEM63A/HSP90AA1/DYNC1H1/SERPINA1/NPC2/RAB24/STK10/CYSTM1/NIT2/PRKCD/APEH/PTPRN2/MGAM/KCNAB2/TNFRSF1B/UBR4/DDOST/FUCA1/AGL/LAMTOR2/NCSTN/HSPA6/ARSA/SYNGR1/MIF/RAB31/SERPINB6/HSPA1A/HSPA1B/RAB44/HSP90AB1/GAA/TIMP2/KPNB1/ORMDL3/JUP/ACLY/GHDC/GRN/CD300A/KCMF1/GLB1/GYG1/PTX3/PLD1/RNASET2/ERP44/GSN/STOM…	120
GO:0042770	signal transduction in response to DNA damage	42/3282	131/18862	3.07818e-05	0.00210568	0.00173546	BRCC3/RPS6KA6/SPRED1/BTG2/MDM4/DYRK3/DTL/UIMC1/CDC25C/PCBP4/PAXIP1/CASP2/CNOT4/MAD2L2/PLK3/GADD45A/MUC1/MIF/BID/PMAIP1/CDKN1A/DDX5/PPM1D/TFDP2/SPRED2/ACER2/E2F7/MDM2/ZNF385A/SP100/PLA2R1/ANKRD1/NDRG1/CNOT7/ARID3A/E2F4/RBL2/PLK2/RGCC/DYRK1A/ATM/PIDD1	42
GO:0051962	positive regulation of nervous system development	72/3282	263/18862	3.36924e-05	0.00227973	0.00187891	PLXNB3/GPER1/SRRT/SLIT2/ISLR2/SEMA7A/FLRT2/NUMB/NIN/RGS14/LRRTM2/CDKL3/PLXND1/PPARG/DAG1/PLXNB1/RHEB/SMARCD3/SMO/IL6/GLI3/CAMK2B/TNFRSF1B/SPEN/EPHB2/MACF1/NGF/SEMA4A/TSPO/LIF/CUL7/SRF/TTBK1/VEGFA/HAP1/TRPV2/ASPA/HES1/IL1RAP/FAIM/SHOX2/PRKCI/SKIL/NLGN1/GOLGA4/CX3CR1/TIAM2/UFL1/TPBG/TRIM32/LRP1/CLSTN3/OBSL1/FN1/LRP2/EGR2/DLG5/MEGF8/EEF2K/METRN/OTP/MAP1B/SLITRK5/TIAM1/BMP2/ZNF335/CDH4/PAK1/MAP6/RASS…	72
GO:0090313	regulation of protein targeting to membrane	17/3282	36/18862	3.49542e-05	0.00231479	0.0019078	CEMIP/PDZK1/MTCL1/ERBB2/CDK5R1/SLC1A1/STOM/C2CD5/MFF/ANK3/DMTN/AKT2/ITGAM/ITGB2/PRNP/KCNB1/PAK1	17
GO:1904951	positive regulation of establishment of protein localization	86/3282	328/18862	3.58024e-05	0.002346	0.00193353	ACSL4/GPER1/ACHE/YWHAG/OAZ2/CEMIP/SEC16B/RAB29/PFKFB2/TGFB2/TP53BP2/TGFB3/ABLIM3/PRKCD/ARIH2/SMO/SRI/TOMM7/GLI3/EGFR/CCT6A/UBE2J2/ATP13A2/ZC3H12A/PLK3/LEPROT/PDZK1/UBE2L3/BID/MTCL1/MYOM1/PMAIP1/HSPA1L/HSP90AB1/USP36/ERBB2/JUP/CDK5R1/TFDP2/PRKCE/CCT4/TCP1/GJA1/STOM/PHPT1/RAN/NR1H4/CEP290/LRP1/C2CD5/CAPN10/MFF/BAG3/TCF7L2/ANKRD1/ANK3/MCU/KIF5B/UBR5/YWHAZ/FBXW7/CEP135/TRPM4/BBC3/AKT2/PIK3R2/UBL5/PAR…	86
GO:0090314	positive regulation of protein targeting to membrane	15/3282	30/18862	4.35566e-05	0.00268455	0.00221256	CEMIP/PDZK1/MTCL1/ERBB2/CDK5R1/STOM/C2CD5/MFF/ANK3/AKT2/ITGAM/ITGB2/PRNP/KCNB1/PAK1	15
GO:0007178	transmembrane receptor protein serine/threonine kinase signaling pathway	92/3282	358/18862	4.44813e-05	0.00271467	0.00223738	GPC3/USP9X/SMURF1/SPRED1/THBS1/RNF111/CILP/SMAD6/TGFB2/PARP1/TGFB3/LTBP2/EGR1/LOX/NREP/PPARG/ZYX/HOXA13/INHBA/JUN/NOTCH2/F11R/TWSG1/RNF165/HIVEP1/KIAA0319/HSPA1A/HSP90AB1/RUNX2/CD109/SOST/DDX5/SMURF2/WFIKKN2/TOB1/NOG/FAM83G/UBB/HES1/VEPH1/SKIL/EMILIN1/LTBP1/RPS27A/SPRED2/ATOH8/MAP3K7/ROR2/UBC/BTBD11/APPL2/CHST11/LEMD3/USP15/INHBC/GDF11/STRAP/CREB1/DLX1/LRP2/HTRA1/PDCD4/DKK1/PBLD/PARD3/FOXH1/RBPMS…	92
GO:0010257	NADH dehydrogenase complex assembly	25/3282	65/18862	4.53952e-05	0.00271717	0.00223944	ND6/ND5/ND4/ND3/ND2/ND1/NDUFB11/NDUFA2/NDUFA5/NDUFA6/NDUFB5/NDUFA8/NDUFA10/NDUFB8/NDUFAF6/NDUFC1/NDUFA13/NDUFB7/ECSIT/NDUFA7/NDUFB10/NDUFS4/NDUFAF5/NDUFC2/NDUFV1	25
GO:0032981	mitochondrial respiratory chain complex I assembly	25/3282	65/18862	4.53952e-05	0.00271717	0.00223944	ND6/ND5/ND4/ND3/ND2/ND1/NDUFB11/NDUFA2/NDUFA5/NDUFA6/NDUFB5/NDUFA8/NDUFA10/NDUFB8/NDUFAF6/NDUFC1/NDUFA13/NDUFB7/ECSIT/NDUFA7/NDUFB10/NDUFS4/NDUFAF5/NDUFC2/NDUFV1	25
GO:1903793	positive regulation of anion transport	117/3282	478/18862	4.66728e-05	0.00276703	0.00228053	GPC3/APLN/ACSL4/GPER1/TFR2/ACHE/YWHAG/ATP8A1/OAZ2/CEMIP/SEC16B/RNASEL/DHX9/ADORA1/RAB29/PFKFB2/TGFB2/TP53BP2/TGFB3/NFKBIA/SLC34A1/ABLIM3/SLC12A2/PRKCD/SLC38A3/ARIH2/SMO/ABCB4/SRI/TOMM7/GLI3/EGFR/UBE2J2/ATP13A2/LDLRAP1/ZC3H12A/PLK3/SCP2/LEPROT/PDZK1/ATF4/CLTCL1/UBE2L3/BID/MTCL1/MYOM1/PMAIP1/HSPA1L/HSP90AB1/C1QTNF1/USP36/ERBB2/JUP/CDK5R1/ALOX12B/TFDP2/PRKCI/PRKCE/RHOQ/GJA1/PTCH1/NR4A3/STOM/PHPT1/RA…	117
GO:1903053	regulation of extracellular matrix organization	20/3282	47/18862	4.79831e-05	0.00276915	0.00228228	AGT/FGFR4/DAG1/IL6/AEBP1/TNFRSF1B/DDR2/CLASP2/EMILIN1/ANTXR1/LRP1/TNFRSF1A/DPP4/RGCC/RUNX1/CST3/BMP2/SLC2A10/ETS1/EFEMP2	20
GO:0032528	microvillus organization	13/3282	24/18862	4.80431e-05	0.00276915	0.00228228	RAPGEF6/PODXL/ESPN/RAP1GAP/ATP8B1/SLC9A3R1/TNIK/PLD1/VIL1/RAPGEF2/FXYD5/KLF5/USH1C	13
GO:0046835	carbohydrate phosphorylation	13/3282	24/18862	4.80431e-05	0.00276915	0.00228228	PFKFB2/PFKFB4/FGGY/GALK1/XYLB/KHK/RBKS/NAGK/IPPK/HKDC1/HK1/PFKFB3/GNPTG	13
GO:1905475	regulation of protein localization to membrane	56/3282	194/18862	5.07285e-05	0.00289711	0.00238774	GPC3/IQSEC2/GRIPAP1/MMP14/GPER1/YWHAG/FZD9/CEMIP/ATP2B4/TP53BP2/NUMB/SQSTM1/DAG1/EGFR/EPHA2/EPHB2/LDLRAP1/TMEM59/PDZK1/BID/MTCL1/CDH2/PMAIP1/ERBB2/CDK5R1/STX8/TFDP2/PRKCI/PKDCC/PRKCE/RHOQ/SLC1A1/GSN/STOM/LRP1/C2CD5/MFF/VIL1/SORBS1/ANK3/KIF5B/YWHAZ/DMTN/SLC7A11/BBC3/AKT2/ITGAM/DAB2/ITGB2/SLC5A3/PRNP/KCNB1/PAK1/STX3/PPFIA1/CD81	56
GO:0043433	negative regulation of DNA-binding transcription factor activity	52/3282	177/18862	5.57313e-05	0.00312547	0.00257595	RLIM/TMSB4X/EIF2AK4/TRAF3/NFKBIA/IRAK2/BHLHE40/PAXIP1/EZH2/SRI/CTNNBIP1/MAD2L2/ZC3H12A/FAF1/HMOX1/TRIM40/PIM1/NFKBIE/PKHD1/CDK5RAP3/FOXJ1/HES1/EOMES/PELI1/ANXA4/UFL1/TNFAIP3/PTCH1/KLF4/NR1H4/DDIT3/SP100/TCF7L2/SUFU/TAF3/FOXH1/PARP10/FZD6/NLRP12/CARD8/MAP3K10/NFKBIB/NWD1/CYLD/DAP/GAS6/PRMT2/SIK1/PRNP/ARRB1/CAT/SIGIRR	52
GO:0048705	skeletal system morphogenesis	60/3282	213/18862	6.08939e-05	0.00329621	0.00271667	MMP14/CHSY1/FGFR3/WDR19/TGFB3/SIX4/MSX2/FGF18/ANXA6/HYAL1/SETD2/INSIG1/HOXA1/HOXA2/GLI3/DHRS3/ALPL/TBX15/SLC39A1/THBS3/MEF2D/FOXC1/HOXB9/HOXB6/PCGF2/THRA/AXIN2/NOG/RYK/TIPARP/SHOX2/IFT80/CSRNP1/ROR2/ZFAND5/TRPV4/TMEM119/CHST11/ALX1/HOXC4/TULP3/HOXD4/HOXD8/FGF8/SGPL1/FGFR1/BMP1/MEGF8/ANKRD11/FOXC2/WWOX/SMPD3/GLG1/IRX5/IFT140/NIPBL/SPEF2/DSCAML1/TSKU/LTBP3	60
GO:0016570	histone modification	110/3282	448/18862	6.77637e-05	0.00351524	0.0028972	BRCC3/USP51/HDAC6/KDM6A/BAZ1B/EID1/SIN3A/KDM5B/ELK4/MTA1/SETD3/OTUB2/BAZ1A/UIMC1/DTX3L/HDAC11/TADA3/BRPF1/SETD5/RYBP/PRKCD/MST1/SETD2/PAXIP1/KMT2C/EZH2/KDM7A/CPA4/KMT2E/CHD5/PARK7/MTHFR/SFPQ/RLF/MYSM1/MIER1/MTF2/CRTC2/MUC1/ASH1L/USP21/HDAC10/BRD1/LIF/THAP7/PPM1F/IRF4/VEGFA/SUPT3H/USP36/PHB/PCGF2/EZH1/KANSL1/JMJD6/SUZ12/SUPT6H/USP22/PER1/KDM6B/BCL6/ACTL6A/DPY30/TET3/UFL1/MAP3K7/PHF2/KDM4C/TAF1L/PH…	110
GO:0009062	fatty acid catabolic process	35/3282	106/18862	6.97743e-05	0.00358105	0.00295144	ECHS1/IVD/SLC27A2/ACOX2/MFSD2A/SCP2/CPT2/ACADM/CPT1B/ABHD3/ACAA2/ECI2/ALDH3A2/PCCB/MCEE/ACOXL/AIG1/CNR1/SLC27A4/ACADS/ACACB/PECR/PHYH/DECR1/BDH2/ETFB/CPT1C/AKT2/ILVBL/LONP2/ECI1/DECR2/AMACR/LPIN3/ACAT1	35
GO:0085029	extracellular matrix assembly	19/3282	45/18862	8.39016e-05	0.0040171	0.00331082	THSD4/AGT/QSOX1/LOX/DAG1/LAMB2/LAMB1/TNXB/CLASP2/PXDN/EMILIN1/ANTXR1/NTN4/SMPD3/MYH11/GAS6/RGCC/LTBP3/EFEMP2	19
GO:0035970	peptidyl-threonine dephosphorylation	12/3282	22/18862	8.63953e-05	0.00404369	0.00333273	DUSP9/DUSP10/DUSP1/PPP2CA/PPM1F/PPM1D/PPM1G/DUSP6/DUSP16/DUSP5/DUSP4/DUSP8	12
GO:0006977	DNA damage response, signal transduction by p53 class mediator resulting in cell cycle arrest	22/3282	56/18862	8.815e-05	0.0040511	0.00333884	BTG2/MDM4/CDC25C/PCBP4/CASP2/CNOT4/PLK3/GADD45A/MUC1/CDKN1A/TFDP2/E2F7/MDM2/ZNF385A/CNOT7/ARID3A/E2F4/RBL2/PLK2/RGCC/ATM/PIDD1	22
GO:0072659	protein localization to plasma membrane	73/3282	275/18862	8.82201e-05	0.0040511	0.00333884	GRIPAP1/MMP14/GPER1/SMURF1/EHD4/ATP2B4/NFASC/AMN/TTC7B/NUMB/SQSTM1/RAPGEF6/TSPAN33/EGFR/EPHA2/EPHB2/LDLRAP1/MACF1/TMEM59/PDZK1/PIP5K1A/F11R/PPIL2/RAB31/CDH2/JUP/SLC4A1/SLC9A3R1/FLOT2/IFT20/STX8/CLASP2/P2RY1/PRKCI/TNIK/GOLGA4/PKDCC/PRKCE/RHOQ/TMEM150A/MAP7/TPBG/PTCH1/RILPL2/LRP1/C2CD5/TNFRSF1A/VIL1/SORBS1/ANK3/TSPAN15/KIF5B/OPTN/IKBKB/GOLGA7/RAPGEF2/ANK2/AKT2/RAB3D/CRB3/BSG/BBS2/RAB26/DAB2/GAS6/SY…	73
GO:0043122	regulation of I-kappaB kinase/NF-kappaB signaling	66/3282	244/18862	0.000103394	0.00463043	0.00381631	TSPAN6/CARD11/TRAF3/SQSTM1/NDFIP1/TFG/TMED4/ZC3H12A/MIER1/CTH/BCL10/LAMTOR5/ASH1L/LGALS1/HMOX1/RIOK3/RIPK1/TRIM38/SLC35B2/SECTM1/NR1D1/TMEM101/LGALS9/PER1/DDX1/PRKCE/REL/PELI1/SLC20A1/UFL1/GJA1/TNFAIP3/MAP3K7/LURAP1L/TRIM14/TRIM32/TRAF1/NR1H4/TNFRSF1A/DDX21/OPTN/SHARPIN/MTDH/RIPK2/IKBKB/TNFRSF10B/TLR3/ALPK1/ANKRD17/NLRP12/IRF3/CARD8/BRD4/CC2D1A/JMJD8/PLK2/NDFIP2/FKBP1A/MAVS/TGM2/UBE2V1/LIME1/TRIM…	66
GO:0043409	negative regulation of MAPK cascade	52/3282	181/18862	0.000105525	0.0046588	0.0038397	DUSP9/RPS6KA6/NDRG2/GPER1/SPRED1/AGT/RGS2/ATF3/DUSP10/DACT1/RGS14/DUSP1/SPRY4/PPP2CA/PRKCD/DAG1/ERRFI1/EPHB2/GBA/ASH1L/FBLN1/LIF/RANBP9/PHB/CDK5RAP3/CD300A/SLC9A3R1/DUSP14/PER1/EMILIN1/SPRED2/CNKSR3/DNAJA1/KLF4/AMBP/PEBP1/SH2B3/DUSP6/DUSP16/EIF3A/PDCD4/DUSP5/MYC/DUSP4/APOE/PIK3R2/CYLD/FOXO1/ARRB1/SMPD1/GSTP1/DUSP8	52
GO:0071156	regulation of cell cycle arrest	35/3282	108/18862	0.000106858	0.00468444	0.00386083	HMGN5/FOXO4/GPER1/FZD9/BTG2/MDM4/CDC25C/PCBP4/CASP2/CNOT4/SLC25A33/ZBTB17/PLK3/GADD45A/MUC1/MIF/CDKN1A/HSP90AB1/RPL23/CDK5R1/TFDP2/E2F7/MDM2/ZNF385A/CNOT7/AKT2/ARID3A/E2F4/RBL2/PLK2/POU4F1/RGCC/ATM/RRP8/PIDD1	35
GO:0050770	regulation of axonogenesis	45/3282	151/18862	0.000118395	0.00505392	0.00416535	PLXNB3/MCF2/SLIT2/ISLR2/SEMA7A/TNR/NIN/CDKL3/FSTL4/PLXND1/SEMA3B/PLXNB1/SEMA3C/EPHB2/MACF1/NGF/SEMA6C/SEMA4A/CDH2/KIAA0319/SRF/VEGFA/CDK5R1/TRPV2/EFNB3/PAK2/RYK/SHOX2/SKIL/GOLGA4/TIAM2/EPHA7/LRP1/DIP2B/FN1/SPP1/MEGF8/PTPRS/METRN/MAP1B/TIAM1/CDH4/PAK1/MAP6/BDNF	45
GO:2001233	regulation of apoptotic signaling pathway	88/3282	348/18862	0.000118729	0.00505392	0.00416535	DDX3X/GPER1/SERPINE1/STYXL1/FZD9/THBS1/BMF/AGT/ATF3/PARP1/BDKRB2/MAPK9/RAF1/PRKCD/GNAI2/CASP2/INHBA/PARK7/RPL11/LCK/SFPQ/FAF1/TXNDC12/CTH/BCL10/MUC1/PEA15/HMOX1/XBP1/MIF/BID/ACAA2/PMAIP1/RIPK1/HSPA1A/HSPA1B/PCGF2/SLC9A3R1/NOG/UBB/PAK2/FAIM/SIAH2/SKIL/CX3CR1/SLC35F6/EIF2AK3/NCK2/TNFAIP3/HNRNPK/DNAJA1/TRIM32/TRAF1/APAF1/MDM2/DDIT3/ZNF385A/TMBIM6/LRRK2/ITM2C/SP100/STRADB/ITGA6/NR4A2/TCF7L2/ITPRIP/FA…	88
GO:0072431	signal transduction involved in mitotic G1 DNA damage checkpoint	22/3282	57/18862	0.000120158	0.00505392	0.00416535	BTG2/MDM4/CDC25C/PCBP4/CASP2/CNOT4/PLK3/GADD45A/MUC1/CDKN1A/TFDP2/E2F7/MDM2/ZNF385A/CNOT7/ARID3A/E2F4/RBL2/PLK2/RGCC/ATM/PIDD1	22
GO:1902400	intracellular signal transduction involved in G1 DNA damage checkpoint	22/3282	57/18862	0.000120158	0.00505392	0.00416535	BTG2/MDM4/CDC25C/PCBP4/CASP2/CNOT4/PLK3/GADD45A/MUC1/CDKN1A/TFDP2/E2F7/MDM2/ZNF385A/CNOT7/ARID3A/E2F4/RBL2/PLK2/RGCC/ATM/PIDD1	22
GO:0022904	respiratory electron transport chain	37/3282	117/18862	0.000122267	0.00510814	0.00421003	CYTB/ND6/ND5/ND4/ND4L/ND3/COX3/COX2/COX1/ND2/ND1/NDUFB11/NDUFA2/NDUFA5/DLD/NDUFA4/PARK7/SDHB/NDUFA6/BID/POLG2/NDUFB5/NDUFA8/GPD1/NDUFA10/GPD2/NDUFB8/NDUFC1/ETFB/NDUFA13/NDUFB7/NDUFA7/NDUFB10/NDUFS4/NDUFC2/NDUFV1/SLC25A22	37
GO:0097193	intrinsic apoptotic signaling pathway	74/3282	283/18862	0.000132652	0.00543263	0.00447747	AIFM1/DDX3X/AEN/STYXL1/BMF/CHAC1/TP53BP2/PARP1/CRIP1/BDKRB2/SGPP1/ITPR1/PRKCD/CASP2/PARK7/TNFRSF1B/EPHA2/RPL11/LCK/SFPQ/TXNDC12/MUC1/ATF4/HMOX1/XBP1/MIF/PPM1F/BID/PMAIP1/HSPA1A/CDKN1A/ERN1/DDX5/SLC9A3R1/PDK2/UBB/SKIL/MSH2/EIF2AK3/NCK2/CD24/HNRNPK/TOPORS/DNAJA1/TRIM32/APAF1/MDM2/DDIT3/ZNF385A/TMBIM6/LRRK2/TNFRSF1A/SCN2A/BNIP3/DDIT4/PPIF/TNFRSF10B/FNIP2/FBXW7/BBC3/PLAUR/NDUFA13/TMEM161A/WWOX/CYLD/Z…	74
GO:0006637	acyl-CoA metabolic process	34/3282	105/18862	0.000135533	0.00547851	0.00451528	ACSL4/PDK3/PDHA1/PDHB/DLD/PDK4/OGDH/HMGCL/PPT1/ACOT11/PMVK/ELOVL5/FASN/ACLY/PDK2/ACSF2/PIPOX/MCEE/ACACB/ACSL5/GPAM/ACSL1/AADAT/CBR4/TECR/PDPR/ACSM3/ACSM5/HMGCS1/ACAT1/DGAT2/PDHX/HSD17B12/GLYAT	34
GO:0042326	negative regulation of phosphorylation	100/3282	407/18862	0.000138076	0.00554529	0.00457033	DUSP9/YWHAG/SLIT2/SPRED1/SMAD6/AGT/RGS2/PPP1R15B/DUSP10/BDKRB2/SLC8A3/RGS14/DUSP1/SPRY4/PPP2CA/CBLB/PARP14/PRKCD/PRKAG2/INHBA/PARK7/ERRFI1/EPHB2/ZC3H12A/CDKN2C/GADD45A/GBA/FBLN1/PPM1F/CDKN1A/PPP2R5D/CD109/CDK5RAP3/SLC4A1/HEXIM1/CD300A/SPAG9/NOG/GGNBP2/DUSP14/SUZ12/PAK2/EIF4G1/TRIB2/EMILIN1/SOCS5/SPRED2/NCK2/CNKSR3/TNFAIP3/GNAQ/DNAJA1/SH2B3/DUSP6/PTPRQ/LRRK2/STRAP/PTPRO/DUSP16/TRAF3IP1/PRDX3/PDCD4…	100
GO:1903362	regulation of cellular protein catabolic process	67/3282	251/18862	0.000140959	0.0056248	0.00463585	F8A1/RNF128/UBQLN2/SMURF1/MAP1A/ARIH1/HSP90AA1/DACT1/STYX/HECTD1/MAPK9/CAMLG/VGLL4/RYBP/ARIH2/PARK7/ATP13A2/RPL11/RNF19B/PLK3/FAF1/GBA/RBX1/MGAT3/CSNK1E/RNF144B/HSPA1A/HSPA1B/HSP90AB1/CDK5RAP3/OSBPL7/RPL23/TLK2/UBB/TRIB2/ATRAID/SOCS5/XPO1/UFL1/TNFAIP3/ABCA2/TMTC3/MDM2/LRP1/PRICKLE1/LRRK2/USP5/LRP2/SUFU/WAC/FBXW7/PRKCG/APOE/SIRT2/LDLR/CSNK2A2/AXIN1/RNF180/PLK2/CDC20B/DAB2/USP25/TRIB3/DDRGK1/CTSC/S…	67
GO:0016569	covalent chromatin modification	111/3282	461/18862	0.000145643	0.00577468	0.00475938	BRCC3/USP51/HDAC6/KDM6A/BAZ1B/EID1/SIN3A/KDM5B/ELK4/MTA1/SETD3/OTUB2/BAZ1A/UIMC1/CHD1/DTX3L/HDAC11/TADA3/BRPF1/SETD5/RYBP/PRKCD/MST1/SETD2/PAXIP1/KMT2C/EZH2/KDM7A/CPA4/KMT2E/CHD5/PARK7/MTHFR/SFPQ/RLF/MYSM1/MIER1/MTF2/CRTC2/MUC1/ASH1L/USP21/HDAC10/BRD1/LIF/THAP7/PPM1F/IRF4/VEGFA/SUPT3H/USP36/PHB/PCGF2/EZH1/KANSL1/JMJD6/SUZ12/SUPT6H/USP22/PER1/KDM6B/BCL6/ACTL6A/DPY30/TET3/UFL1/MAP3K7/PHF2/KDM4C/TAF…	111
GO:0021544	subpallium development	12/3282	23/18862	0.000152069	0.00595365	0.00490688	BCL11B/CNTNAP2/FOXP2/INHBA/GLI3/LRRK2/DLX1/FGF8/SLC7A11/BBS2/ZSWIM6/SLITRK5	12
GO:0021904	dorsal/ventral neural tube patterning	11/3282	20/18862	0.000155645	0.00598416	0.00493203	WDR19/GPR161/FOXA1/SMO/GLI3/PRKACB/PTCH1/TCTN1/TULP3/SUFU/FKBP8	11
GO:0061041	regulation of wound healing	40/3282	131/18862	0.000155732	0.00598416	0.00493203	SERPINE1/CLDN4/THBS1/SERPINC1/F12/HBEGF/SLC12A2/PROS1/MYLK/PRKCD/EPHB2/CLDN19/F3/XBP1/CD109/C1QTNF1/APOH/GP1BA/SERPINF2/CLASP2/PRKCE/GJA1/TNFAIP3/KANK1/SH2B3/TSPAN8/VIL1/TFPI/PRKG1/EPPK1/PLAT/DMTN/APOE/PLAUR/CADM4/FOXC2/OCLN/F7/UBASH3B/SERPING1	40
GO:0072329	monocarboxylic acid catabolic process	40/3282	131/18862	0.000155732	0.00598416	0.00493203	ECHS1/IVD/SLC27A2/ACOX2/MFSD2A/AKR1A1/SCP2/CPT2/ACADM/CPT1B/ABHD3/ACAA2/ECI2/ALDH3A2/PCCB/XYLB/MCEE/ACOXL/AIG1/CNR1/IDNK/SLC27A4/ACADS/ACACB/PECR/HOGA1/PHYH/DECR1/BDH2/ETFB/CPT1C/AKT2/ILVBL/LONP2/ECI1/DECR2/AMACR/CRYL1/LPIN3/ACAT1	40
GO:0009755	hormone-mediated signaling pathway	54/3282	193/18862	0.000167243	0.00638703	0.00526407	HDAC6/GPER1/NEDD4/ESRRG/PARP1/TSHR/ESR2/FOXA1/STRN3/NR3C1/PPARG/TADA3/PARK7/ARID1A/SSTR3/DAXX/PHB/THRA/NR1D1/CRHR1/DDX5/PER1/NR1D2/UFL1/NR2E1/DNAJA1/NR4A3/NCOR2/CRY1/APPL2/CALCOCO1/GPAM/FOXH1/UBR5/ACSL1/PGRMC2/SLC27A1/SAFB/SAFB2/SSTR5/AXIN1/DAB2/PRLR/LATS2/PRMT2/RUNX1/ASIP/DDRGK1/PMEPA1/PGR/PAK1/ARNTL/GTF2H1/LGR4	54
GO:0045732	positive regulation of protein catabolic process	61/3282	225/18862	0.000172865	0.0065615	0.00540786	GPC3/RNF128/UBQLN2/SMURF1/NEDD4/OAZ2/ARIH1/SNX33/DTL/HSP90AA1/DACT1/HECTD1/MAPK9/NDFIP1/CBLB/VGLL4/ARIH2/HECW1/TNFRSF1B/RNF19B/PLK3/FAF1/GBA/RBX1/CSNK1E/RNF144B/HSPA1A/HSPA1B/SNF8/OSBPL7/SMURF2/RILP/TIPARP/TRIB2/SOCS5/GJA1/TNFAIP3/TRIM32/ABCA2/TMTC3/MDM2/LRP1/PRICKLE1/LRRK2/USP5/LRP2/FBXW7/APOE/SIRT2/NDUFA13/LDLR/AXIN1/RNF180/PLK2/CDC20B/DAB2/FOXO1/TRIB3/DDRGK1/CTSC/CD81	61
GO:0008203	cholesterol metabolic process	44/3282	149/18862	0.000176084	0.00656362	0.00540961	EBP/MBTPS2/CLN6/NPC2/INSIG1/LDLRAP1/LEPR/PMVK/GBA/HSD17B7/SEC14L2/NPC1/ACAA2/FASN/NFE2L1/KPNB1/STARD3/ACLY/FDXR/SCARF1/RAN/SCARB1/ACACB/NFYB/NR1H4/LIMA1/LPCAT3/HDLBP/INSIG2/GPAM/CUBN/SQLE/ERLIN2/EPHX2/FDFT1/APOE/LDLR/MBTPS1/HMGCS1/TSKU/DGAT2/SMPD1/CAT/DHCR7	44
GO:0008643	carbohydrate transport	44/3282	149/18862	0.000176084	0.00656362	0.00540961	GPC3/RNASEL/SLC35A4/RFT1/PRKAG2/SLC35B4/AQP1/MFSD2A/SLC5A9/SLC35A3/SLC50A1/PEA15/SLC2A11/CLTCL1/SLC25A27/SLC5A10/PRKCI/SLC2A2/RHOQ/AQP3/NR4A3/SLC27A4/TSC1/HNF1A/APPL2/C2CD5/CREBL2/CAPN10/VIL1/SORBS1/RTN2/RAB4B/AKT2/SLC27A1/INSR/C3/SMPD3/OCLN/TERT/SLC5A3/TRIB3/SLC23A2/SLC2A10/SLC37A4	44
GO:0034620	cellular response to unfolded protein	44/3282	149/18862	0.000176084	0.00656362	0.00540961	TSPYL2/MBTPS2/TMEM33/PPP1R15B/YOD1/ATF3/HSPA2/CREBRF/HSPA9/CREB3L2/IGFBP1/ZBTB17/CTH/EXTL2/HSPA6/ATF4/KDELR3/XBP1/HSPA1L/HSPA1A/HSPA1B/DAXX/KLHDC3/CUL7/CDK5RAP3/ERN1/PREB/EIF2AK3/NCK2/UFL1/ERMP1/DDIT3/TMBIM6/DDX11/HSPD1/BAG3/OPTN/CXCL8/MBTPS1/TMTC4/DDRGK1/VAPB/HSPA8/TPP1	44
GO:1902895	positive regulation of pri-miRNA transcription by RNA polymerase II	17/3282	40/18862	0.000178468	0.00661289	0.00545022	APLN/SMAD6/TGFB2/NR3C1/EGR1/PPARG/GNL3/JUN/SRF/ATOH8/FOXO3/KLF4/TERT/KLF5/BMP2/ETS1/FOSL1	17
GO:0071158	positive regulation of cell cycle arrest	28/3282	82/18862	0.000188446	0.00686009	0.00565396	FOXO4/BTG2/MDM4/CDC25C/PCBP4/CASP2/CNOT4/ZBTB17/PLK3/GADD45A/MUC1/CDKN1A/RPL23/CDK5R1/TFDP2/E2F7/MDM2/ZNF385A/CNOT7/ARID3A/E2F4/RBL2/PLK2/POU4F1/RGCC/ATM/RRP8/PIDD1	28
GO:0046890	regulation of lipid biosynthetic process	56/3282	203/18862	0.000191974	0.00694791	0.00572633	MBTPS2/GPER1/FGFR4/EGR1/PRKCD/INSIG1/PRKAG2/PDK4/H6PD/WDTC1/MFSD2A/PMVK/TSPO/SEC14L2/ASXL3/ELOVL5/FASN/KPNB1/ORMDL3/NR1D1/ABCA2/RAN/SCARB1/ACACB/NFYB/NR1H4/AVIL/CREBL2/LPCAT3/TNFRSF1A/IDH1/CREB1/GPAM/SORBS1/SQLE/ERLIN2/ASAH1/FDFT1/FBXW7/NFKB1/IGFBP7/APOE/SLC27A1/LDLR/C3/MBTPS1/SMPD3/HMGCS1/PIBF1/SIK1/EIF6/TRIB3/BMP2/DGAT2/ADM/DHCR7	56
GO:0032508	DNA duplex unwinding	34/3282	107/18862	0.000203867	0.00729351	0.00601117	CETN2/ERCC6L/DDX3X/CHD2/INO80/DHX9/PARP1/CHD1/POLQ/RAD54L2/SSBP1/POT1/CHD5/RAD54L/HFM1/RBX1/GTF2H4/RECQL5/BRIP1/UBB/RFC4/DDX1/RPS27A/UBC/HELB/DDX11/CHD4/DNA2/SUPV3L1/RAD54B/CHD7/CHD9/GTF2H1/NAV2	34
GO:1903364	positive regulation of cellular protein catabolic process	44/3282	150/18862	0.000207796	0.00739161	0.00609202	RNF128/UBQLN2/SMURF1/ARIH1/HSP90AA1/DACT1/HECTD1/MAPK9/VGLL4/ARIH2/RNF19B/PLK3/FAF1/GBA/RBX1/CSNK1E/RNF144B/HSPA1A/HSPA1B/OSBPL7/TRIB2/SOCS5/TNFAIP3/ABCA2/TMTC3/MDM2/LRP1/PRICKLE1/LRRK2/USP5/LRP2/FBXW7/APOE/SIRT2/LDLR/AXIN1/RNF180/PLK2/CDC20B/DAB2/TRIB3/DDRGK1/CTSC/CD81	44
GO:0006470	protein dephosphorylation	82/3282	325/18862	0.000214799	0.00756568	0.00623549	DUSP9/PPP1R3E/ELFN1/STYXL1/PPP2R2C/ADORA1/PPP1R15B/PTPN14/DUSP10/PPP2R5C/PTPN21/STYX/DUSP1/FBXW11/CDC25C/PPP2CA/PRKCD/GNAI2/CDC25A/PTPRN2/CAMTA1/LCK/CDC14A/GBA/PPM1F/PPP4R1/PHLPP1/PPP1R10/PPP2R5D/HSP90AB1/PTP4A1/PPP1R27/CD300A/PPM1D/DUSP14/MYH3/LRRIQ4/ACP1/PPM1G/RNGTT/PPP6C/TSC1/PHPT1/PGAM5/PPTC7/NUAK1/DUSP6/PTPRQ/PPP1R12A/LRRK2/PTPRO/DUSP16/CTDSP1/SLC39A10/PTPN18/PPP2R2D/LHPP/SHOC2/DUSP5/PPP1R3C…	82
GO:1902402	signal transduction involved in mitotic DNA damage checkpoint	22/3282	59/18862	0.000216336	0.00756568	0.00623549	BTG2/MDM4/CDC25C/PCBP4/CASP2/CNOT4/PLK3/GADD45A/MUC1/CDKN1A/TFDP2/E2F7/MDM2/ZNF385A/CNOT7/ARID3A/E2F4/RBL2/PLK2/RGCC/ATM/PIDD1	22
GO:1902403	signal transduction involved in mitotic DNA integrity checkpoint	22/3282	59/18862	0.000216336	0.00756568	0.00623549	BTG2/MDM4/CDC25C/PCBP4/CASP2/CNOT4/PLK3/GADD45A/MUC1/CDKN1A/TFDP2/E2F7/MDM2/ZNF385A/CNOT7/ARID3A/E2F4/RBL2/PLK2/RGCC/ATM/PIDD1	22
GO:0090150	establishment of protein localization to membrane	88/3282	354/18862	0.000222114	0.00772436	0.00636627	GRIPAP1/YWHAG/VPS37D/EMC4/SRP14/BMF/RPLP1/CEMIP/ADORA1/RAB3GAP2/TP53BP2/AMN/HSP90AA1/EMC9/HSPA4/ATG3/AGK/EXOC4/NACAD/EGFR/ICMT/RPL11/MACF1/PDZK1/SSR2/PEX19/SAMM50/BID/RAB31/MTCL1/NPC1/PMAIP1/RPS10/TRAM2/RPL23/ERBB2/RPL27/CDK5R1/RPL35A/RTP2/TFDP2/PRKCI/GOLGA4/RPSA/PKDCC/RPS27A/CD24/RPS12/SLC1A1/ZDHHC21/STOM/RPL35/RILPL2/VPS37B/C2CD5/MFF/ZDHHC6/ANK3/PARD3/OPTN/YWHAZ/GOLGA7/DMTN/RPL34/SRP72/EMC10/BB…	88
GO:0044783	G1 DNA damage checkpoint	23/3282	63/18862	0.000226119	0.00781994	0.00644504	BTG2/MDM4/CDC25C/PCBP4/CASP2/CNOT4/PLK3/GADD45A/MUC1/CDKN1A/TFDP2/E2F7/MDM2/ZNF385A/WAC/CNOT7/ARID3A/E2F4/RBL2/PLK2/RGCC/ATM/PIDD1	23
GO:0021591	ventricular system development	13/3282	27/18862	0.000229654	0.00789833	0.00650965	CENPF/NUMB/AQP1/CELSR2/ATP1B2/KIF27/DPCD/RAPGEF2/SLC7A11/MBOAT7/RPGRIP1L/DNAH5/TSKU	13
GO:0046879	hormone secretion	77/3282	302/18862	0.000232574	0.00795479	0.00655619	APLN/ACSL4/GPER1/TFR2/VGF/SNAP23/AGT/KDM5B/ADORA1/PFKFB2/CHGA/EFNA5/STXBP5L/RAF1/ITPR1/CACNA1D/PTPRN2/SRI/IL6/INHBA/EGFR/PARK7/PIM3/LIF/C1QTNF1/NR1D1/CRHR1/P2RY1/SLC2A2/PRKCE/SLC16A10/GJA1/CNR1/HMGN3/PHPT1/HNF1A/TBX3/CRY1/NR1H4/LRP1/ITPR2/CACNA1C/CAPN10/PER2/CREB1/KLF7/DPP4/TCF7L2/MCU/CAMK2G/KIF5B/MAFA/ENY2/RIMS2/CHD7/SPP1/IL11/TRPM4/LTBP4/CACNA1A/RAB11B/MIDN/SMPD3/SSTR5/FOXD1/OXCT1/PFKL/TIAM1/HN…	77
GO:0031397	negative regulation of protein ubiquitination	27/3282	79/18862	0.000239455	0.00814539	0.00671327	OTUB2/SQSTM1/PRR7/CAMLG/DTX3L/ISG15/PARK7/MAD2L2/RPL11/TSPO/RASD2/HSPA1A/HSPA1B/RPL23/NXN/PRKCE/UFL1/TNFAIP3/DNAJA1/CRY1/PER2/TRIP12/GTPBP4/PARP10/UBR5/PRKCG/ARRB1	27
GO:0051222	positive regulation of protein transport	79/3282	312/18862	0.000246061	0.00832463	0.006861	ACSL4/GPER1/ACHE/YWHAG/OAZ2/CEMIP/SEC16B/RAB29/PFKFB2/TGFB2/TP53BP2/TGFB3/ABLIM3/PRKCD/ARIH2/SMO/SRI/TOMM7/GLI3/EGFR/UBE2J2/ATP13A2/ZC3H12A/PLK3/LEPROT/PDZK1/UBE2L3/BID/MTCL1/MYOM1/PMAIP1/HSPA1L/HSP90AB1/USP36/ERBB2/JUP/CDK5R1/TFDP2/PRKCE/GJA1/STOM/PHPT1/RAN/NR1H4/CEP290/LRP1/C2CD5/CAPN10/MFF/BAG3/TCF7L2/ANKRD1/ANK3/MCU/KIF5B/UBR5/YWHAZ/FBXW7/TRPM4/BBC3/AKT2/PIK3R2/UBL5/PARD6A/CSNK2A2/ITGAM/OXCT1…	79
GO:0043281	regulation of cysteine-type endopeptidase activity involved in apoptotic process	56/3282	205/18862	0.000252745	0.00850454	0.00700928	AIFM1/DDX3X/GPER1/THBS1/CTSH/PRR7/FNIP1/IFT57/FAM162A/RAF1/PPARG/CASP2/AQP1/PARK7/LCK/BCL10/F3/LAMTOR5/NGF/PPM1F/BID/BCL2L13/PMAIP1/RIPK1/VEGFA/LGALS9/PAK2/SIAH2/SOX2/WDR35/EIF2AK3/EPHA7/SLC1A1/ACER2/KLF4/TNFSF15/GSN/APAF1/VIL1/HSPD1/PRDX3/FAS/MYC/TNFRSF10B/DLC1/NLRP12/CARD8/BBC3/PLAUR/NDUFA13/DAP/GAS6/ARRB1/RAG1/PRDX5/PIDD1	56
GO:0045880	positive regulation of smoothened signaling pathway	15/3282	34/18862	0.000259173	0.00862756	0.00711067	GPC3/CHSY1/EVC/ULK3/FOXA1/TXNDC15/SMO/DCDC2/SHOX2/IFT172/GLI1/ARMC9/STK36/DLG5/DYNC2H1	15
GO:0071383	cellular response to steroid hormone stimulus	55/3282	201/18862	0.000272562	0.00902469	0.00743798	ND3/HDAC6/GPER1/NEDD4/ESRRG/PARP1/ESR2/FOXA1/STRN3/NR3C1/TADA3/AQP1/EGFR/PARK7/ERRFI1/ARID1A/SSTR3/UBE2L3/NPC1/FECH/DAXX/PHB/NR1D1/DDX5/PER1/UFL1/NR2E1/SGK1/DNAJA1/NR4A3/NCOR2/CRY1/CALCOCO1/TFPI/GPAM/DDIT4/FOXH1/UBR5/PGRMC2/ZFP36/SAFB/SAFB2/SSTR5/AXIN1/DAB2/FOXO1/FLT3/PRMT2/RUNX1/DDRGK1/PMEPA1/PGR/PAK1/ARNTL/GSTP1	55
GO:0007039	protein catabolic process in the vacuole	10/3282	18/18862	0.000280972	0.00917925	0.00756536	RNF128/ATP13A2/GBA/MGAT3/LRP1/LRP2/CCDC115/LDLR/TPP1/CD81	10
GO:0051091	positive regulation of DNA-binding transcription factor activity	69/3282	266/18862	0.000281644	0.00917925	0.00756536	BEX1/MBTPS2/CARD11/BUD31/AGT/DHX9/ESR2/FOXA1/TRIM41/PPARG/IRAK2/SMO/FZD1/IL6/PARK7/CTH/BCL10/LAMTOR5/CRTC2/DDR2/RIPK1/TRIM38/TRIM15/TRIM26/HSPA1A/HSPA1B/SRF/VEGFA/CARD14/JUP/FZD2/FLOT2/LGALS9/UBB/DHX33/IL1RAP/PRKCI/CX3CR1/RPS27A/IL18RAP/MAP3K7/TRIM14/TRIM32/TRAF1/UBC/DDIT3/STK36/PRDX3/NFKB2/PPRC1/MTDH/RIPK2/IKBKB/TLR3/NEUROG2/NFKB1/CRTC1/RGCC/ITGB2/MAVS/DDRGK1/UBE2V1/FZD4/TRIM6/TRIM5/CAT/RPS6KA4/…	69
GO:0002753	cytoplasmic pattern recognition receptor signaling pathway	25/3282	72/18862	0.000304257	0.00980828	0.0080838	TSPAN6/NFKBIA/IRAK2/PUM1/RIOK3/TRIM15/HSPA1A/HSPA1B/PHB/SEC14L1/UBB/PUM2/RPS27A/TNFAIP3/MAP3K7/UBC/USP15/IFIH1/RIPK2/DDX60/ALPK1/ANKRD17/IRF3/CYLD/UBE2V1	25
GO:0043434	response to peptide hormone	104/3282	435/18862	0.000305672	0.00980828	0.0080838	CYTB/UPRT/FOXO4/TIMP1/PHEX/GPER1/BAIAP2L1/VGF/YWHAG/CPEB2/QDPR/BTG2/PARP1/TSHR/SLC34A1/ATP6V0E1/SPARC/EGR1/PPARG/TIMP4/PRKCD/GNAI2/DAG1/INSIG1/ATP6V0E2/ATP6V0A4/PDK4/IGFBP1/ERRFI1/SLC25A33/AGTRAP/WDTC1/PIK3R3/LEPROT/PRKACB/BCAR3/PKLR/RANGAP1/XBP1/RAB31/BAIAP2/PHB/CDC6/CRHR1/PDK2/BRIP1/PRKCI/ADCY3/KHK/ATP6V1E2/RHOQ/ARID1B/GJA1/GCNT1/KANK1/NR4A3/SLC27A4/TSC1/EIF2B1/CRY1/APPL2/NR1H4/SOCS2/STAT6/STAT…	104
GO:0006084	acetyl-CoA metabolic process	16/3282	38/18862	0.000313137	0.0099963	0.00823876	PDK3/PDHA1/PDHB/DLD/PDK4/PMVK/FASN/ACLY/PDK2/PIPOX/ACACB/AADAT/PDPR/HMGCS1/ACAT1/PDHX	16
GO:2000116	regulation of cysteine-type endopeptidase activity	61/3282	230/18862	0.000328876	0.0104452	0.00860872	AIFM1/DDX3X/GPER1/THBS1/CTSH/LGMN/PRR7/FNIP1/IFT57/FAM162A/RAF1/PPARG/CASP2/AQP1/PARK7/LCK/BCL10/F3/LAMTOR5/NGF/TBC1D10A/PPM1F/BID/BCL2L13/PMAIP1/RIPK1/TTBK1/VEGFA/LGALS9/PAK2/SIAH2/SOX2/WDR35/EIF2AK3/EPHA7/SLC1A1/ACER2/KLF4/TNFSF15/GSN/APAF1/VIL1/HSPD1/PRDX3/FAS/MYC/RIPK2/TNFRSF10B/DLC1/NLRP12/CARD8/BBC3/PLAUR/NDUFA13/MEFV/DAP/GAS6/ARRB1/RAG1/PRDX5/PIDD1	61
GO:0006631	fatty acid metabolic process	95/3282	392/18862	0.000333375	0.0105343	0.00868217	ACSL4/PDK3/ECHS1/IVD/SLC27A2/LIPC/EPHX1/PPARG/ACOX2/ABHD5/INSIG1/PRKAG2/DLD/PON2/PDK4/LYPLA2/WDTC1/MFSD2A/SCP2/CPT2/ACOT11/ACADM/CPT1B/XBP1/MIF/ABHD3/ACAA2/ZADH2/ECI2/ELOVL5/FASN/ACLY/PDK2/ACSF2/ALDH3A2/ALOXE3/ALOX12B/PCCB/LIPH/MCEE/THNSL2/ACOXL/QKI/AIG1/CNR1/NR4A3/SLC27A4/ACADS/ACACB/APPL2/LTA4H/TNFRSF1A/PER2/PECR/ACADSB/ACSL5/GPAM/SGPL1/PHYH/ECHDC3/DECR1/ERLIN2/EPHX2/ASAH1/ACSL1/CBR4/BDH2/ADH5/…	95
GO:0071616	acyl-CoA biosynthetic process	20/3282	53/18862	0.000343682	0.0106971	0.00881635	ACSL4/PDK3/PDHA1/PDHB/DLD/PDK4/PPT1/ELOVL5/FASN/ACLY/PDK2/ACACB/ACSL5/ACSL1/CBR4/TECR/PDPR/ACAT1/PDHX/HSD17B12	20
GO:0010944	negative regulation of transcription by competitive promoter binding	7/3282	10/18862	0.000352058	0.0108493	0.00894181	MAD2L2/MUC1/PHB/BHLHE41/CREB1/DACH1/KDM2A	7
GO:0048251	elastic fiber assembly	7/3282	10/18862	0.000352058	0.0108493	0.00894181	THSD4/LOX/TNXB/EMILIN1/MYH11/LTBP3/EFEMP2	7
GO:0030308	negative regulation of cell growth	51/3282	185/18862	0.000367901	0.0112264	0.00925259	TSPYL2/DDX3X/SLIT2/APBB2/SEMA7A/TNR/RGS2/TGFB2/YY1/ESR2/CDKL3/PPP2CA/FSTL4/DCBLD2/PPARG/VGLL4/HYAL1/SEMA3B/SEMA3C/INHBA/PPT1/CDKN2C/SEMA6C/SEMA4A/KIAA0319/TRIM40/HSPA1A/HSPA1B/CDKN1A/PHB/SPAG9/CDK5R1/BCL6/RYK/GJA1/EPHA7/DIP2B/SH3BP4/CDKN2AIP/JADE1/SPP1/DACT3/SERTAD3/NDUFA13/PTPRS/DCUN1D3/ING1/HNF4A/PAK1/APBB1/CCDC85B	51
GO:0061512	protein localization to cilium	22/3282	61/18862	0.00037461	0.0113201	0.00932984	WDR19/RAB29/SPATA7/ARL13B/IFT122/ZMYND10/TTC26/BBS9/CROCC/IFT20/RABEP1/IFT80/WDR35/TCTN2/TCTN1/TULP3/TTC21B/ZNF423/IFT140/DZIP1/DYNC2H1/BBS1	22
GO:0072413	signal transduction involved in mitotic cell cycle checkpoint	22/3282	61/18862	0.00037461	0.0113201	0.00932984	BTG2/MDM4/CDC25C/PCBP4/CASP2/CNOT4/PLK3/GADD45A/MUC1/CDKN1A/TFDP2/E2F7/MDM2/ZNF385A/CNOT7/ARID3A/E2F4/RBL2/PLK2/RGCC/ATM/PIDD1	22
GO:0009063	cellular amino acid catabolic process	33/3282	106/18862	0.000381807	0.0114761	0.00945838	QDPR/IVD/GLUL/ATP2B4/ALDH6A1/ALDH7A1/HGD/DLD/HIBADH/OGDH/ALDH4A1/HMGCL/DDAH1/ENOSF1/ALDH5A1/PIPOX/ASPA/MCCC1/ALDH8A1/SDSL/PAH/CSAD/HNMT/OAT/HOGA1/AADAT/PRODH2/ABAT/MCCC2/FTCD/CBS/AHCY/ASRGL1	33
GO:0043407	negative regulation of MAP kinase activity	26/3282	77/18862	0.00038442	0.0114761	0.00945838	DUSP9/SPRED1/AGT/RGS2/DUSP10/RGS14/DUSP1/SPRY4/PPP2CA/PRKCD/GBA/CDK5RAP3/CD300A/DUSP14/SPRED2/DNAJA1/SH2B3/DUSP6/DUSP16/PDCD4/DUSP5/DUSP4/APOE/SMPD1/GSTP1/DUSP8	26
GO:0072401	signal transduction involved in DNA integrity checkpoint	25/3282	73/18862	0.000387145	0.0114761	0.00945838	BRCC3/BTG2/MDM4/DTL/UIMC1/CDC25C/PCBP4/CASP2/CNOT4/PLK3/GADD45A/MUC1/CDKN1A/TFDP2/E2F7/MDM2/ZNF385A/CNOT7/ARID3A/E2F4/RBL2/PLK2/RGCC/ATM/PIDD1	25
GO:0072422	signal transduction involved in DNA damage checkpoint	25/3282	73/18862	0.000387145	0.0114761	0.00945838	BRCC3/BTG2/MDM4/DTL/UIMC1/CDC25C/PCBP4/CASP2/CNOT4/PLK3/GADD45A/MUC1/CDKN1A/TFDP2/E2F7/MDM2/ZNF385A/CNOT7/ARID3A/E2F4/RBL2/PLK2/RGCC/ATM/PIDD1	25
GO:0043405	regulation of MAP kinase activity	77/3282	307/18862	0.000398361	0.0117526	0.00968627	DUSP9/SPRED1/THBS1/AGT/RGS2/DUSP10/TGFB3/RGS14/DUSP1/FGF18/SPRY4/PPP2CA/IRAK2/PRKCD/EZH2/EGFR/EPHB2/MAP3K6/GADD45A/GBA/PEA15/RIPK1/DAXX/VEGFA/PDE6G/CDK5RAP3/ERBB2/ERN1/CD300A/SPAG9/DUSP14/MAP2K3/UBB/MAP2K4/TNIK/TRIB2/RPS27A/SPRED2/CD24/MAP3K7/ROR2/DNAJA1/UBC/SH2B3/DUSP6/IGFBP6/LRRK2/DUSP16/PDCD4/DUSP5/AVPI1/DKK1/RIPK2/FGFR1/DUSP4/C5AR1/APOE/MAP3K10/GDF15/INSR/GADD45B/SHC2/MLKL/MAPK3/FLT3/TIAM1/TR…	77
GO:0072001	renal system development	73/3282	288/18862	0.000400339	0.0117552	0.00968844	GPC3/SLIT2/SMAD6/CTSH/KIF26B/AGT/CENPF/TGFB2/SIX4/SLC34A1/EGR1/PLXND1/LAMB2/AKR1B1/PODXL/SMO/GLI3/CTNNBIP1/TACSTD2/NFIA/NOTCH2/WNT7B/MPST/IFT27/LIF/FOXC1/VEGFA/PKHD1/FOXJ1/JMJD6/NOG/IFT20/HES1/TIPARP/CD24/AHI1/EPHA7/PTCH1/GCNT1/TSC1/APAF1/CEP290/GDF11/LRRK2/KCNJ8/PTPRO/TRAF3IP1/LRP2/FGF8/SGPL1/DLG5/MYC/CA2/ANGPT2/NPNT/GPR4/CRLF1/FOXC2/PKD1L3/RPGRIP1L/GCNT4/FOXD1/NIPBL/COL4A1/GZF1/ASXL1/BMP2/DYNC2…	73
GO:0051607	defense response to virus	67/3282	260/18862	0.000416803	0.0121243	0.00999262	TSPAN6/ISG20/RNF216/EIF2AK4/SIN3A/LYST/RNASEL/DHX9/TRIM11/TRAF3/HSP90AA1/IRF9/IRF1/PARP9/DTX3L/SETD2/ZC3HAV1/IL6/ISG15/PUM1/ZC3H12A/APOBEC3G/APOBEC3C/RIOK3/PMAIP1/TRIM15/PHB/SEC14L1/PLSCR1/DDX1/PUM2/AGBL5/TNFAIP3/OAS3/USP15/STAT2/KCNJ8/TRAF3IP1/IFIH1/BNIP3/DMBT1/HTRA1/GPAM/IFIT3/DDX21/DDIT4/BNIP3L/CNOT7/TLR3/DDX60/ABCE1/ELMOD2/ANKRD17/NLRP9/IRF3/ILF3/ZDHHC1/MLKL/SERINC5/ADARB1/MAVS/SERINC3/RNF26/…	67
GO:0140546	defense response to symbiont	67/3282	260/18862	0.000416803	0.0121243	0.00999262	TSPAN6/ISG20/RNF216/EIF2AK4/SIN3A/LYST/RNASEL/DHX9/TRIM11/TRAF3/HSP90AA1/IRF9/IRF1/PARP9/DTX3L/SETD2/ZC3HAV1/IL6/ISG15/PUM1/ZC3H12A/APOBEC3G/APOBEC3C/RIOK3/PMAIP1/TRIM15/PHB/SEC14L1/PLSCR1/DDX1/PUM2/AGBL5/TNFAIP3/OAS3/USP15/STAT2/KCNJ8/TRAF3IP1/IFIH1/BNIP3/DMBT1/HTRA1/GPAM/IFIT3/DDX21/DDIT4/BNIP3L/CNOT7/TLR3/DDX60/ABCE1/ELMOD2/ANKRD17/NLRP9/IRF3/ILF3/ZDHHC1/MLKL/SERINC5/ADARB1/MAVS/SERINC3/RNF26/…	67
GO:0090068	positive regulation of cell cycle process	76/3282	303/18862	0.000432123	0.0125115	0.0103117	FOXO4/DDX3X/INO80/TMOD3/KIF23/SIN3A/BTG2/MDM4/DYRK3/DTL/DYNC1H1/HSPA2/CDC25C/PCBP4/HYAL1/CDC25A/KLHL18/SMARCD3/EZH2/CASP2/CNOT4/KMT2E/DBF4/HOXA13/EGFR/ZBTB17/SFPQ/PLK3/GADD45A/CDC14A/MUC1/CDKN1A/ANAPC11/RPL23/CDC6/CDC27/RAD51C/CDK5R1/SOX15/TFDP2/PLSCR1/EIF4G1/PRKCE/ANAPC5/E2F7/MDM2/GLI1/ZNF385A/DDX11/FGF8/UBXN2B/CNOT7/EREG/ANKRD17/SIRT2/BRD4/INSR/ARID3A/CDK10/E2F4/SMPD3/RBL2/SH2B1/SSTR5/ANKRD31/P…	76
GO:1903035	negative regulation of response to wounding	29/3282	90/18862	0.000446972	0.0127633	0.0105193	SERPINE1/THBS1/TNR/F12/SLC12A2/PROS1/PRKCD/CLDN19/KREMEN1/KIAA0319/CD109/C1QTNF1/APOH/GP1BA/SERPINF2/CLASP2/GJA1/SH2B3/TSPAN8/TFPI/PRKG1/EPPK1/PLAT/SPP1/APOE/PLAUR/PTPRS/UBASH3B/SERPING1	29
GO:0034504	protein localization to nucleus	70/3282	275/18862	0.000457835	0.0130138	0.0107257	KPNA7/SIN3A/GLUL/PARP1/SIX4/NFKBIA/FAM53C/CBLB/PARP9/DTX3L/PRKCD/SMO/GLI3/CCT6A/PARK7/ATP13A2/RPL11/ZC3H12A/LAMTOR5/NUP50/RANGAP1/CARD10/LIF/NUP153/E2F3/TRIM40/PPP1R10/CDKN1A/BYSL/HSP90AB1/CDK5RAP3/KPNB1/RPL23/ORMDL3/JUP/TMEM98/KPNA4/CCT4/EIF2AK3/RANBP2/TCP1/TOPORS/TOR1A/RAN/CABP1/APPL2/MDM2/PRICKLE1/LRRK2/SP100/BAG3/SUFU/TAF3/UBR5/PIK3R2/ELAVL1/MBTPS1/NUP155/CCT5/TERT/KPNA3/LATS2/SUMO3/MORC3/CCT…	70
GO:0001657	ureteric bud development	28/3282	86/18862	0.000460721	0.0130363	0.0107443	GPC3/SLIT2/SMAD6/KIF26B/AGT/SIX4/SMO/GLI3/CTNNBIP1/TACSTD2/FOXC1/VEGFA/FOXJ1/NOG/HES1/PTCH1/GDF11/FGF8/MYC/NPNT/CRLF1/FOXC2/FOXD1/GZF1/BMP2/DCHS1/LGR4/CAT	28
GO:0034312	diol biosynthetic process	11/3282	22/18862	0.000464657	0.0130882	0.010787	QDPR/SPTLC2/GCH1/AGK/GBA/SPR/SPTLC1/ACER2/ABCA2/ASAH1/SPTLC3	11
GO:0001822	kidney development	71/3282	280/18862	0.000470962	0.0131949	0.0108749	GPC3/SLIT2/SMAD6/CTSH/KIF26B/AGT/CENPF/TGFB2/SIX4/SLC34A1/EGR1/PLXND1/LAMB2/AKR1B1/PODXL/SMO/GLI3/CTNNBIP1/TACSTD2/NOTCH2/WNT7B/MPST/IFT27/LIF/FOXC1/VEGFA/PKHD1/FOXJ1/JMJD6/NOG/IFT20/HES1/TIPARP/CD24/AHI1/EPHA7/PTCH1/GCNT1/TSC1/APAF1/CEP290/GDF11/LRRK2/KCNJ8/PTPRO/TRAF3IP1/LRP2/FGF8/SGPL1/DLG5/MYC/CA2/ANGPT2/NPNT/GPR4/CRLF1/FOXC2/PKD1L3/RPGRIP1L/GCNT4/FOXD1/NIPBL/GZF1/ASXL1/BMP2/DYNC2H1/DCHS1/LGR…	71
GO:0050772	positive regulation of axonogenesis	26/3282	78/18862	0.00048237	0.0133133	0.0109726	PLXNB3/SLIT2/ISLR2/SEMA7A/NIN/PLXND1/PLXNB1/MACF1/NGF/SRF/VEGFA/TRPV2/SHOX2/SKIL/GOLGA4/TIAM2/LRP1/FN1/MEGF8/METRN/MAP1B/TIAM1/CDH4/PAK1/MAP6/BDNF	26
GO:0070373	negative regulation of ERK1 and ERK2 cascade	26/3282	78/18862	0.00048237	0.0133133	0.0109726	DUSP9/RPS6KA6/NDRG2/GPER1/SPRED1/ATF3/DUSP10/RGS14/DUSP1/SPRY4/ERRFI1/EPHB2/FBLN1/LIF/RANBP9/PHB/SLC9A3R1/EMILIN1/SPRED2/CNKSR3/KLF4/DUSP6/EIF3A/DUSP4/ARRB1/GSTP1	26
GO:0031571	mitotic G1 DNA damage checkpoint	22/3282	62/18862	0.0004863	0.0133133	0.0109726	BTG2/MDM4/CDC25C/PCBP4/CASP2/CNOT4/PLK3/GADD45A/MUC1/CDKN1A/TFDP2/E2F7/MDM2/ZNF385A/CNOT7/ARID3A/E2F4/RBL2/PLK2/RGCC/ATM/PIDD1	22
GO:0010001	glial cell differentiation	56/3282	210/18862	0.000487381	0.0133133	0.0109726	DUSP10/SLC8A3/HDAC11/PPARG/DAG1/LAMB2/RHEB/SMO/IL6/GLI3/EGFR/MXRA8/TNFRSF1B/CDKN2C/TSPAN2/PHGDH/GBA/NCSTN/HDAC10/LIF/CDH2/DAAM2/TTBK1/ERBB2/NR1D1/GRN/ITGB4/NOG/TMEM98/ASPA/HES1/SOX2/NR2E1/ROR2/GSN/ABCA2/EIF2B1/LRP1/ERBB3/DLX1/BNIP3/EGR2/PARD3/NDRG1/ARHGEF10/C5AR1/PRX/AKT2/SIRT2/LDLR/MAPK3/METRN/BACE2/BMP2/MYRF/GSTP1	56
GO:0018209	peptidyl-serine modification	82/3282	333/18862	0.000488474	0.0133133	0.0109726	RPS6KA6/HDAC6/PDK3/PARP2/ATP2B4/DYRK3/PARP1/MARK3/HSP90AA1/BDKRB2/MAPK9/FNIP1/RAF1/PRKCD/MST1/IL6/EGFR/PARK7/MAD2L2/MAST2/GADD45A/BCAR3/NGF/MAPK12/CSNK1E/LIF/MIF/PPM1F/RIPK1/TTBK1/VEGFA/HSP90AB1/TLK2/ERN1/MGAT5B/GGNBP2/CDK5R1/PAK2/PRKCI/EIF4G1/DCLK3/PRKCE/EIF2AK3/NCK2/CNKSR3/SGK1/SLC1A1/GALNT4/LRRK2/STK38L/CREBL2/CLK1/PLCL1/DKK1/SPOCK2/DDIT4/MASTL/RIPK2/IKBKB/DMTN/SPOCK3/FNIP2/IL11/PRKCG/AKT2/MAP…	82
GO:2001056	positive regulation of cysteine-type endopeptidase activity	43/3282	151/18862	0.000490103	0.0133133	0.0109726	AIFM1/DDX3X/GPER1/CTSH/LGMN/PRR7/IFT57/FAM162A/PPARG/CASP2/LCK/BCL10/F3/NGF/TBC1D10A/PPM1F/BID/BCL2L13/PMAIP1/RIPK1/TTBK1/LGALS9/WDR35/EIF2AK3/SLC1A1/ACER2/TNFSF15/GSN/APAF1/HSPD1/FAS/MYC/RIPK2/TNFRSF10B/DLC1/NLRP12/CARD8/BBC3/NDUFA13/MEFV/DAP/ARRB1/PIDD1	43
GO:0030193	regulation of blood coagulation	23/3282	66/18862	0.000491898	0.0133133	0.0109726	SERPINE1/THBS1/SERPINC1/F12/PROS1/PRKCD/EPHB2/F3/C1QTNF1/APOH/GP1BA/SERPINF2/SH2B3/TSPAN8/TFPI/PRKG1/PLAT/DMTN/APOE/PLAUR/F7/UBASH3B/SERPING1	23
GO:0016241	regulation of macroautophagy	45/3282	160/18862	0.00049455	0.0133272	0.010984	UBQLN2/HDAC6/LAMTOR4/NEDD4/QSOX1/RAB3GAP2/SPTLC2/ATP6V0E1/LARP1/FYCO1/PRKAG2/RHEB/ATP6V0E2/EXOC4/ATP13A2/LAMTOR5/GBA/LAMTOR2/HMOX1/NPC1/USP36/CALCOCO2/ERN1/CDK5R1/ATP6V1E2/MAP3K7/SPTLC1/TSC1/ATG101/LRRK2/BNIP3/BAG3/WAC/OPTN/NRBP2/RIPK2/ATP6V1H/RB1CC1/BNIP3L/LZTS1/SCOC/MAPK3/SMG1/FEZ1/UVRAG	45
GO:0060972	left/right pattern formation	10/3282	19/18862	0.000500817	0.0134379	0.0110752	MNS1/IFT57/SMO/NOTCH2/FOXJ1/IFT172/AHI1/DPCD/PITX2/MEGF8	10
GO:0042775	mitochondrial ATP synthesis coupled electron transport	31/3282	99/18862	0.000505825	0.013514	0.011138	CYTB/ND6/ND5/ND4/ND4L/ND3/COX3/COX2/COX1/ND2/ND1/NDUFB11/NDUFA2/NDUFA5/DLD/NDUFA4/PARK7/NDUFA6/BID/NDUFB5/NDUFA8/NDUFA10/NDUFB8/NDUFC1/NDUFA13/NDUFB7/NDUFA7/NDUFB10/NDUFS4/NDUFC2/NDUFV1	31
GO:0060840	artery development	30/3282	95/18862	0.000527562	0.0140345	0.011567	DLL4/SMAD6/LOXL1/TGFB2/HECTD1/LOX/MYLK/PLXND1/ADAMTS9/HOXA1/HOXA13/GLI3/LUZP1/FOXC1/SRF/VEGFA/NOG/HES1/LRP1/ARID2/PRICKLE1/LRP2/SUFU/FGF8/FOXH1/CHD7/APOE/FOXC2/SLC2A10/EFEMP2	30
GO:0043401	steroid hormone mediated signaling pathway	39/3282	134/18862	0.000548237	0.0143451	0.011823	HDAC6/GPER1/NEDD4/ESRRG/PARP1/ESR2/FOXA1/STRN3/NR3C1/TADA3/PARK7/ARID1A/DAXX/PHB/NR1D1/DDX5/PER1/UFL1/NR2E1/DNAJA1/NR4A3/NCOR2/CRY1/CALCOCO1/GPAM/FOXH1/UBR5/PGRMC2/SAFB/SAFB2/AXIN1/DAB2/PRMT2/RUNX1/DDRGK1/PMEPA1/PGR/PAK1/ARNTL	39
GO:0050810	regulation of steroid biosynthetic process	29/3282	91/18862	0.000548455	0.0143451	0.011823	MBTPS2/FGFR4/EGR1/INSIG1/H6PD/PMVK/TSPO/SEC14L2/FASN/KPNB1/NR1D1/RAN/ACACB/NFYB/NR1H4/LPCAT3/GPAM/SQLE/ERLIN2/ASAH1/FDFT1/NFKB1/IGFBP7/APOE/MBTPS1/HMGCS1/BMP2/ADM/DHCR7	29
GO:0034101	erythrocyte homeostasis	36/3282	121/18862	0.000559763	0.0145796	0.0120162	KLF13/TMOD3/DYRK3/HSPA9/ALAS1/KMT2E/INHBA/ISG15/BRD1/HMOX1/TRIM10/HSPA1A/HSPA1B/SRF/VEGFA/SMAP1/HOXB6/CDK5RAP3/THRA/SLC4A1/JMJD6/BCL6/SLC25A38/EPAS1/UFL1/FOXO3/SH2B3/INPP5D/DMTN/AXL/ZFP36/KLF1/ZFPM1/PKNOX1/FAM210B/ETS1	36
GO:0072163	mesonephric epithelium development	28/3282	87/18862	0.000568089	0.0146673	0.0120885	GPC3/SLIT2/SMAD6/KIF26B/AGT/SIX4/SMO/GLI3/CTNNBIP1/TACSTD2/FOXC1/VEGFA/FOXJ1/NOG/HES1/PTCH1/GDF11/FGF8/MYC/NPNT/CRLF1/FOXC2/FOXD1/GZF1/BMP2/DCHS1/LGR4/CAT	28
GO:0072164	mesonephric tubule development	28/3282	87/18862	0.000568089	0.0146673	0.0120885	GPC3/SLIT2/SMAD6/KIF26B/AGT/SIX4/SMO/GLI3/CTNNBIP1/TACSTD2/FOXC1/VEGFA/FOXJ1/NOG/HES1/PTCH1/GDF11/FGF8/MYC/NPNT/CRLF1/FOXC2/FOXD1/GZF1/BMP2/DCHS1/LGR4/CAT	28
GO:0007179	transforming growth factor beta receptor signaling pathway	54/3282	202/18862	0.000570198	0.0146673	0.0120885	USP9X/SMURF1/SPRED1/THBS1/RNF111/SMAD6/TGFB2/PARP1/TGFB3/LTBP2/LOX/NREP/ZYX/JUN/F11R/TWSG1/HSPA1A/HSP90AB1/CD109/SMURF2/WFIKKN2/UBB/VEPH1/SKIL/EMILIN1/LTBP1/RPS27A/SPRED2/MAP3K7/UBC/APPL2/CHST11/LEMD3/USP15/STRAP/CREB1/HTRA1/PBLD/PARD3/FOXH1/LTBP4/GDF15/PARD6A/GLG1/TGFB1I1/VASN/CREBBP/DAB2/LATS2/SLC2A10/PMEPA1/CBL/LPXN/LTBP3	54
GO:0071900	regulation of protein serine/threonine kinase activity	114/3282	492/18862	0.000576409	0.014766	0.0121699	DUSP9/DDX3X/YWHAG/SPRED1/THBS1/CEMIP/AGT/RGS2/ATP2B4/DUSP10/TGFB3/SLC8A3/RGS14/DUSP1/FGF18/SPRY4/CDC25C/PPP2CA/IRAK2/PRKCD/MST1/CDC25A/PRKAG2/EZH2/DBF4/EGFR/EPHB2/MAP3K6/CDKN2C/GADD45A/GBA/PEA15/RIPK1/DAXX/CDKN1A/VEGFA/HSP90AB1/PDE6G/CDK5RAP3/ERBB2/CDC6/HEXIM1/ERN1/CD300A/SPAG9/DUSP14/CDK5R1/MAP2K3/UBB/MAP2K4/CCNL1/TNIK/TRIB2/RPS27A/SPRED2/CD24/TNFAIP3/MAP3K7/ROR2/DNAJA1/UBC/SH2B3/DUSP6/IGFBP6/DA…	114
GO:0061387	regulation of extent of cell growth	32/3282	104/18862	0.000583653	0.0147964	0.0121949	ISLR2/SEMA7A/SIN3A/TNR/CDKL3/FSTL4/SEMA3B/SEMA3C/MACF1/NGF/SEMA6C/SEMA4A/KIAA0319/SRF/VEGFA/CDK5R1/TRPV2/RYK/GOLGA4/EPHA7/LRP1/DIP2B/FN1/DPYSL2/SPP1/APOE/MEGF8/PTPRS/MAP1B/CDH4/PAK1/BDNF	32
GO:1900180	regulation of protein localization to nucleus	38/3282	130/18862	0.000584724	0.0147964	0.0121949	SIN3A/GLUL/PARP1/PARP9/DTX3L/PRKCD/SMO/GLI3/CCT6A/PARK7/ATP13A2/ZC3H12A/LAMTOR5/CARD10/LIF/TRIM40/BYSL/HSP90AB1/CDK5RAP3/ORMDL3/JUP/TMEM98/CCT4/EIF2AK3/TCP1/RAN/CABP1/BAG3/SUFU/UBR5/PIK3R2/CCT5/TERT/LATS2/SUMO3/CCT8/MAVS/PKIG	38
GO:0042773	ATP synthesis coupled electron transport	31/3282	100/18862	0.00061265	0.0154148	0.0127046	CYTB/ND6/ND5/ND4/ND4L/ND3/COX3/COX2/COX1/ND2/ND1/NDUFB11/NDUFA2/NDUFA5/DLD/NDUFA4/PARK7/NDUFA6/BID/NDUFB5/NDUFA8/NDUFA10/NDUFB8/NDUFC1/NDUFA13/NDUFB7/NDUFA7/NDUFB10/NDUFS4/NDUFC2/NDUFV1	31
GO:0006635	fatty acid beta-oxidation	25/3282	75/18862	0.000614115	0.0154148	0.0127046	ECHS1/IVD/SLC27A2/ACOX2/MFSD2A/SCP2/CPT2/ACADM/CPT1B/ACAA2/ECI2/ACOXL/CNR1/ACADS/ACACB/DECR1/BDH2/ETFB/CPT1C/AKT2/LONP2/ECI1/DECR2/AMACR/ACAT1	25
GO:0044819	mitotic G1/S transition checkpoint	22/3282	63/18862	0.00062591	0.0155307	0.0128001	BTG2/MDM4/CDC25C/PCBP4/CASP2/CNOT4/PLK3/GADD45A/MUC1/CDKN1A/TFDP2/E2F7/MDM2/ZNF385A/CNOT7/ARID3A/E2F4/RBL2/PLK2/RGCC/ATM/PIDD1	22
GO:0030518	intracellular steroid hormone receptor signaling pathway	34/3282	113/18862	0.000628712	0.0155307	0.0128001	HDAC6/GPER1/NEDD4/PARP1/ESR2/FOXA1/STRN3/NR3C1/TADA3/PARK7/ARID1A/DAXX/PHB/DDX5/PER1/UFL1/DNAJA1/NCOR2/CRY1/CALCOCO1/GPAM/FOXH1/UBR5/SAFB/SAFB2/AXIN1/DAB2/PRMT2/RUNX1/DDRGK1/PMEPA1/PGR/PAK1/ARNTL	34
GO:0043648	dicarboxylic acid metabolic process	30/3282	96/18862	0.000641438	0.0157001	0.0129397	IDH2/GLUL/NIT2/ALDH1L1/DLD/OGDH/MTHFR/SDHB/ALDH4A1/ME2/ALDH5A1/ACLY/SLC46A1/ASPA/MTHFD2/NR1H4/D2HGDH/IDH1/MDH1B/OAT/HOGA1/PHYH/SLC25A32/AADAT/SLC7A11/MTHFD2L/PRODH2/QPRT/FTCD/SLC19A1	30
GO:0030111	regulation of Wnt signaling pathway	88/3282	365/18862	0.000643564	0.0157001	0.0129397	GPC3/DDX3X/ATP6AP2/PSMB5/FZD9/TMEM9/DACT1/EGR1/PPP2CA/VGLL4/CDK14/GLI3/HECW1/IGFBP1/EGFR/CTNNBIP1/MAD2L2/MACF1/TRABD2B/RBX1/CSNK1E/KREMEN1/CDH2/DCDC2/DAAM2/IGFBP4/JUP/SOST/SMURF2/AXIN2/SLC9A3R1/NOG/IFT20/NXN/SIAH2/IFT80/SOX2/PSME4/TCF7L1/RSPO3/TNFAIP3/ROR2/SPIN1/GNAQ/KANK1/NRARP/SCYL2/DDIT3/GLI1/LRP1/IGFBP6/PRICKLE1/LRRK2/PTPRO/IGFBP2/ZRANB1/TCF7L2/TNKS2/DKK1/JRK/RSPO2/FZD6/UBR5/JADE1/NFKB1/TRPM4…	88
GO:0006520	cellular amino acid metabolic process	81/3282	331/18862	0.00064435	0.0157001	0.0129397	SLC16A2/PSMB5/QDPR/IVD/OAZ2/GLUL/ATP2B4/ALDH6A1/GFPT2/ALDH7A1/NIT2/HGD/ACY1/DLD/HIBADH/OGDH/DDC/PARK7/MTHFR/AGMAT/ALDH4A1/HMGCL/CTPS1/CTH/DDAH1/DPYD/WARS2/PHGDH/ATF4/MPST/TST/ENOSF1/ALDH5A1/FN3K/PIPOX/ASPA/SRR/PLOD2/GMPS/MCCC1/ADI1/ODC1/PSME4/THNSL2/IYD/ALDH8A1/SDSL/PAH/NR1H4/CSAD/MARS2/HNMT/OAT/ACADSB/HOGA1/AZIN1/MSRA/AADAT/SLC7A11/SLC39A8/ENOPH1/MTHFD2L/BCAT2/PRODH2/PEPD/ILVBL/PSMB10/NQO1/ABAT/…	81
GO:0000188	inactivation of MAPK activity	12/3282	26/18862	0.00064902	0.0157204	0.0129565	DUSP9/SPRED1/DUSP10/DUSP1/PPP2CA/DUSP14/SPRED2/DUSP6/DUSP16/DUSP5/DUSP4/DUSP8	12
GO:1901216	positive regulation of neuron death	29/3282	92/18862	0.000669637	0.0161569	0.0133163	ELK1/ADORA1/TGFB2/TP53BP2/PARP1/EGR1/ZNF746/CASP2/JUN/ATF4/NQO2/DAXX/GRN/CDK5R1/SARM1/MAP2K4/FOXO3/EPHA7/DDIT3/DKK1/DDIT4/FBXW7/NQO1/ITGAM/EFNB2/ITGB2/PRNP/BACE1/ATM	29
GO:0007517	muscle organ development	78/3282	317/18862	0.00067636	0.0162561	0.013398	FOXO4/CHD2/EVC/DLL4/COPS2/ZBTB18/ACTA1/TNNT2/BTG2/ATF3/CENPF/TGFB2/HLX/SIX4/HBEGF/EGR1/LOX/MYH15/MYLK/SFMBT1/DAG1/SMO/SRI/SGCE/HIVEP3/MEF2D/IGSF8/CASQ1/MAPK12/MAFF/SMTN/LIF/XBP1/MYOM1/FOXC1/TCAP/FZD2/DDX5/HLF/NOG/MYH3/SOX15/NR1D2/SHOX2/FOXN2/UTRN/ERBB3/SPEG/CREB1/LRP2/CCNT2/FGF8/TLL2/ANKRD1/EGR2/FOXH1/JPH1/CHD7/EGR3/SAP30/SGCB/SIRT2/RYR1/EEF2/ZFPM1/FOXC2/CTF1/HOMER1/NLN/POU4F1/KLF5/ADARB1/FKBP1A/…	78
GO:0007019	microtubule depolymerization	17/3282	44/18862	0.000684806	0.016333	0.0134614	HDAC6/MAP1A/CCSAP/CAMSAP2/CLASP2/CAMSAP1/TRPV4/NAV3/MAP1S/KATNB1/MAP1B/KIF2A/TPX2/SPEF1/STMN3/KIF18A/CKAP5	17
GO:0072073	kidney epithelium development	38/3282	131/18862	0.000687619	0.0163375	0.0134651	GPC3/SLIT2/SMAD6/KIF26B/AGT/SIX4/LAMB2/PODXL/SMO/GLI3/CTNNBIP1/TACSTD2/NOTCH2/WNT7B/LIF/FOXC1/VEGFA/FOXJ1/NOG/HES1/CD24/AHI1/EPHA7/PTCH1/GDF11/PTPRO/FGF8/MYC/NPNT/CRLF1/FOXC2/FOXD1/GZF1/ASXL1/BMP2/DCHS1/LGR4/CAT	38
GO:0060993	kidney morphogenesis	28/3282	88/18862	0.00069679	0.0164925	0.0135928	GPC3/KIF26B/AGT/SIX4/SMO/GLI3/CTNNBIP1/TACSTD2/WNT7B/LIF/VEGFA/FOXJ1/NOG/HES1/AHI1/PTCH1/GCNT1/LRRK2/FGF8/MYC/NPNT/GCNT4/FOXD1/GZF1/ASXL1/BMP2/DCHS1/LGR4	28
GO:0030195	negative regulation of blood coagulation	18/3282	48/18862	0.000731256	0.0172128	0.0141865	SERPINE1/THBS1/F12/PROS1/PRKCD/C1QTNF1/APOH/GP1BA/SERPINF2/SH2B3/TSPAN8/TFPI/PRKG1/PLAT/APOE/PLAUR/UBASH3B/SERPING1	18
GO:1905477	positive regulation of protein localization to membrane	37/3282	127/18862	0.000734082	0.0172128	0.0141865	GPER1/YWHAG/CEMIP/ATP2B4/TP53BP2/SQSTM1/EGFR/EPHA2/EPHB2/PDZK1/BID/MTCL1/PMAIP1/ERBB2/CDK5R1/TFDP2/PRKCI/PRKCE/STOM/LRP1/C2CD5/MFF/VIL1/SORBS1/ANK3/KIF5B/YWHAZ/BBC3/AKT2/ITGAM/ITGB2/SLC5A3/PRNP/KCNB1/PAK1/STX3/CD81	37
GO:0018205	peptidyl-lysine modification	93/3282	391/18862	0.000737529	0.0172128	0.0141865	HDAC6/KDM6A/EID1/LOXL1/SIN3A/SETD3/VCPKMT/BAZ1A/EGR1/LOX/SENP7/TADA3/BRPF1/SETD5/GNL3/SETD2/PAXIP1/KMT2C/EZH2/CPA4/KMT2E/CHD5/PARK7/PLOD1/RLF/CTH/MTF2/CRTC2/MUC1/ASH1L/HDAC10/BRD1/NUP50/RANGAP1/RASD2/LIF/THAP7/IRF4/SIRT5/NUP153/SUPT3H/PCGF2/EZH1/KANSL1/JMJD6/SUZ12/SUPT6H/USP22/PER1/SENP3/PLOD2/ACTL6A/DPY30/TET3/RANBP2/MAP3K7/TOPORS/TAF1L/PHF19/GTF3C4/MDM2/DIP2B/IFIH1/IWS1/EGR2/EPC1/SUV39H2/SDR16C…	93
GO:0015749	monosaccharide transmembrane transport	34/3282	114/18862	0.000748415	0.0172128	0.0141865	GPC3/RNASEL/PRKAG2/SLC5A9/SLC50A1/PEA15/SLC2A11/CLTCL1/SLC25A27/SLC5A10/PRKCI/SLC2A2/RHOQ/NR4A3/SLC27A4/TSC1/HNF1A/APPL2/C2CD5/CREBL2/CAPN10/SORBS1/RTN2/RAB4B/AKT2/SLC27A1/INSR/C3/OCLN/TERT/SLC5A3/TRIB3/SLC23A2/SLC2A10	34
GO:0032392	DNA geometric change	34/3282	114/18862	0.000748415	0.0172128	0.0141865	CETN2/ERCC6L/DDX3X/CHD2/INO80/DHX9/PARP1/CHD1/POLQ/RAD54L2/SSBP1/POT1/CHD5/RAD54L/HFM1/RBX1/GTF2H4/RECQL5/BRIP1/UBB/RFC4/DDX1/RPS27A/UBC/HELB/DDX11/CHD4/DNA2/SUPV3L1/RAD54B/CHD7/CHD9/GTF2H1/NAV2	34
GO:0048675	axon extension	34/3282	114/18862	0.000748415	0.0172128	0.0141865	USP9X/SLIT2/ISLR2/SEMA7A/SIN3A/TNR/HSP90AA1/CDKL3/ALCAM/SEMA3B/LAMB2/SEMA3C/MACF1/SEMA6C/SEMA4A/KIAA0319/SRF/VEGFA/HSP90AB1/CDK5R1/TRPV2/RYK/GOLGA4/LRP1/DIP2B/FN1/VCL/DPYSL2/APOE/MEGF8/PTPRS/MAP1B/CDH4/PAK1	34
GO:0016578	histone deubiquitination	11/3282	23/18862	0.000751197	0.0172128	0.0141865	BRCC3/USP51/UIMC1/MYSM1/USP21/SUPT3H/USP36/USP22/USP15/ENY2/ASXL1	11
GO:0061614	pri-miRNA transcription by RNA polymerase II	19/3282	52/18862	0.000764489	0.0172128	0.0141865	APLN/SMAD6/TGFB2/YY1/NR3C1/EGR1/PPARG/GNL3/JUN/SRF/DDX5/ATOH8/FOXO3/KLF4/TERT/KLF5/BMP2/ETS1/FOSL1	19
GO:0072395	signal transduction involved in cell cycle checkpoint	25/3282	76/18862	0.000765935	0.0172128	0.0141865	BRCC3/BTG2/MDM4/DTL/UIMC1/CDC25C/PCBP4/CASP2/CNOT4/PLK3/GADD45A/MUC1/CDKN1A/TFDP2/E2F7/MDM2/ZNF385A/CNOT7/ARID3A/E2F4/RBL2/PLK2/RGCC/ATM/PIDD1	25
GO:0006625	protein targeting to peroxisome	23/3282	68/18862	0.000793718	0.0175446	0.0144599	USP9X/SLC27A2/ACOX2/GSTK1/PEX10/HMGCL/SCP2/PEX19/ECI2/PEX6/PIPOX/UBB/RPS27A/UBC/PECR/IDH1/PHYH/EPHX2/LONP2/DECR2/AMACR/CAT/PEX16	23
GO:0072662	protein localization to peroxisome	23/3282	68/18862	0.000793718	0.0175446	0.0144599	USP9X/SLC27A2/ACOX2/GSTK1/PEX10/HMGCL/SCP2/PEX19/ECI2/PEX6/PIPOX/UBB/RPS27A/UBC/PECR/IDH1/PHYH/EPHX2/LONP2/DECR2/AMACR/CAT/PEX16	23
GO:0072663	establishment of protein localization to peroxisome	23/3282	68/18862	0.000793718	0.0175446	0.0144599	USP9X/SLC27A2/ACOX2/GSTK1/PEX10/HMGCL/SCP2/PEX19/ECI2/PEX6/PIPOX/UBB/RPS27A/UBC/PECR/IDH1/PHYH/EPHX2/LONP2/DECR2/AMACR/CAT/PEX16	23
GO:0010952	positive regulation of peptidase activity	53/3282	200/18862	0.000794792	0.0175446	0.0144599	AIFM1/DDX3X/GPER1/CLDN4/CTSH/LGMN/PRR7/IFT57/FAM162A/PPARG/CASP2/LCK/BCL10/F3/NGF/NCSTN/MAPK12/FBLN1/TBC1D10A/PPM1F/BID/BCL2L13/PMAIP1/RIPK1/TTBK1/GRN/LGALS9/WDR35/PSME4/ANTXR1/EIF2AK3/SLC1A1/ACER2/TNFSF15/GSN/APAF1/FN1/HSPD1/FAS/MYC/RIPK2/TNFRSF10B/DLC1/NLRP12/CARD8/BBC3/NDUFA13/MEFV/DAP/DDRGK1/SEMG1/ARRB1/PIDD1	53
GO:0032434	regulation of proteasomal ubiquitin-dependent protein catabolic process	38/3282	132/18862	0.000806181	0.017712	0.0145979	UBQLN2/MAP1A/ARIH1/STYX/HECTD1/MAPK9/CAMLG/RYBP/ARIH2/PARK7/RPL11/RNF19B/PLK3/GBA/RBX1/CSNK1E/RNF144B/HSPA1A/HSPA1B/HSP90AB1/TLK2/TRIB2/SOCS5/XPO1/UFL1/MDM2/PRICKLE1/LRRK2/USP5/WAC/SIRT2/RNF180/PLK2/CDC20B/DAB2/TRIB3/DDRGK1/SVIP	38
GO:0070198	protein localization to chromosome, telomeric region	13/3282	30/18862	0.000817448	0.017712	0.0145979	TINF2/GNL3/POT1/CCT6A/CCT4/TCP1/TNKS2/TERF1/CCT5/TERT/CCT8/ATM/TPP1	13
GO:0021670	lateral ventricle development	7/3282	11/18862	0.000822291	0.017712	0.0145979	NUMB/AQP1/ATP1B2/DPCD/RPGRIP1L/DNAH5/TSKU	7
GO:0060831	smoothened signaling pathway involved in dorsal/ventral neural tube patterning	7/3282	11/18862	0.000822291	0.017712	0.0145979	WDR19/GPR161/GLI3/PRKACB/PTCH1/TULP3/SUFU	7
GO:0072009	nephron epithelium development	32/3282	106/18862	0.000839751	0.0179721	0.0148122	GPC3/KIF26B/AGT/SIX4/LAMB2/PODXL/SMO/GLI3/CTNNBIP1/TACSTD2/NOTCH2/WNT7B/LIF/FOXC1/VEGFA/FOXJ1/NOG/HES1/CD24/AHI1/PTCH1/PTPRO/FGF8/MYC/NPNT/FOXC2/FOXD1/GZF1/ASXL1/BMP2/DCHS1/LGR4	32
GO:0043123	positive regulation of I-kappaB kinase/NF-kappaB signaling	49/3282	182/18862	0.000843028	0.0179721	0.0148122	TSPAN6/CARD11/NDFIP1/TFG/TMED4/MIER1/CTH/BCL10/LAMTOR5/LGALS1/HMOX1/RIPK1/TRIM38/SLC35B2/SECTM1/TMEM101/LGALS9/DDX1/PRKCE/REL/PELI1/SLC20A1/GJA1/MAP3K7/LURAP1L/TRIM14/TRIM32/TNFRSF1A/DDX21/SHARPIN/MTDH/RIPK2/IKBKB/TNFRSF10B/TLR3/ALPK1/ANKRD17/IRF3/BRD4/CC2D1A/JMJD8/PLK2/NDFIP2/FKBP1A/MAVS/TGM2/UBE2V1/TRIM6/TRIM5	49
GO:0018105	peptidyl-serine phosphorylation	76/3282	310/18862	0.000878165	0.0185938	0.0153246	RPS6KA6/HDAC6/PDK3/ATP2B4/DYRK3/MARK3/HSP90AA1/BDKRB2/MAPK9/FNIP1/RAF1/PRKCD/MST1/IL6/EGFR/PARK7/MAD2L2/MAST2/GADD45A/BCAR3/NGF/MAPK12/CSNK1E/LIF/MIF/PPM1F/RIPK1/TTBK1/VEGFA/HSP90AB1/TLK2/ERN1/GGNBP2/CDK5R1/PAK2/PRKCI/EIF4G1/DCLK3/PRKCE/EIF2AK3/NCK2/CNKSR3/SGK1/SLC1A1/LRRK2/STK38L/CREBL2/CLK1/PLCL1/DKK1/DDIT4/MASTL/RIPK2/IKBKB/DMTN/FNIP2/IL11/PRKCG/AKT2/MAP3K10/MAST1/CSNK2A2/MAPK3/SMG1/AXIN1/PLK2…	76
GO:1900182	positive regulation of protein localization to nucleus	27/3282	85/18862	0.000885615	0.018688	0.0154023	PARP1/PARP9/DTX3L/PRKCD/SMO/GLI3/CCT6A/PARK7/ZC3H12A/LAMTOR5/CARD10/LIF/HSP90AB1/CDK5RAP3/ORMDL3/JUP/CCT4/EIF2AK3/TCP1/RAN/BAG3/UBR5/PIK3R2/CCT5/TERT/CCT8/MAVS	27
GO:0021953	central nervous system neuron differentiation	48/3282	178/18862	0.000911351	0.0187985	0.0154934	SLIT2/DLL4/HERC1/SIN3A/BTG2/HSP90AA1/BCL11B/NIN/SPOCK1/SMO/FZD1/INHBA/GLI3/CHD5/EPHB2/GBA/CSNK1E/MDGA1/HSP90AB1/UBB/FBXO45/HES1/RYK/IFT172/NR2E1/PTCH1/AGTPBP1/TCTN1/SCYL2/TULP3/GBX2/DLX1/TBR1/NR4A2/NANOS1/SUFU/FGF8/RAPGEF2/ATF5/OTP/ZSWIM6/POU4F1/MYCBP2/ADARB1/ZNF335/DYNC2H1/TSKU/SCYL1	48
GO:0021756	striatum development	9/3282	17/18862	0.000913839	0.0187985	0.0154934	BCL11B/CNTNAP2/FOXP2/INHBA/LRRK2/SLC7A11/BBS2/ZSWIM6/SLITRK5	9
GO:0046512	sphingosine biosynthetic process	8/3282	14/18862	0.000922117	0.0187985	0.0154934	SPTLC2/AGK/GBA/SPTLC1/ACER2/ABCA2/ASAH1/SPTLC3	8
GO:0046520	sphingoid biosynthetic process	8/3282	14/18862	0.000922117	0.0187985	0.0154934	SPTLC2/AGK/GBA/SPTLC1/ACER2/ABCA2/ASAH1/SPTLC3	8
GO:1902667	regulation of axon guidance	8/3282	14/18862	0.000922117	0.0187985	0.0154934	SLIT2/VEGFA/PTPRO/TBR1/ZSWIM4/ZSWIM6/MYCBP2/YTHDF1	8
GO:1903025	regulation of RNA polymerase II regulatory region sequence-specific DNA binding	8/3282	14/18862	0.000922117	0.0187985	0.0154934	TMSB4X/ZNF593/LAMTOR5/LIF/ZBTB7C/DDIT3/FBXW7/DDRGK1	8
GO:1905146	lysosomal protein catabolic process	8/3282	14/18862	0.000922117	0.0187985	0.0154934	ATP13A2/GBA/MGAT3/LRP1/LRP2/CCDC115/LDLR/TPP1	8
GO:0048701	embryonic cranial skeleton morphogenesis	17/3282	45/18862	0.00092407	0.0187985	0.0154934	MMP14/WDR19/TGFB3/SIX4/SETD2/HOXA1/HOXA2/GLI3/TBX15/SLC39A1/CHST11/TULP3/FGF8/FOXC2/IRX5/IFT140/NIPBL	17
GO:0003007	heart morphogenesis	61/3282	239/18862	0.000951873	0.019301	0.0159075	SLIT2/DLL4/SMAD6/TNNT2/MDM4/TGFB2/FLRT2/IFT57/PLXND1/SMARCD3/SMO/SEMA3C/DHRS3/RBM15/NOTCH2/FOXC1/PIM1/SRF/VEGFA/GAA/CCDC40/TBX21/TCAP/FZD2/CCDC103/AXIN2/NOG/HES1/EOMES/SHOX2/IFT172/FHL2/AHI1/PTCH1/TBX3/ARID2/LRP2/TBR1/PDCD4/SUFU/FGF8/ANKRD1/DKK1/FOXH1/CHD7/DLC1/PITX2/PPP1R13L/MEGF8/RYR1/INSR/ZFPM1/FOXC2/NIPBL/POU4F1/FKBP1A/ASXL1/BMP2/DCHS1/MICAL2/PARVA	61
GO:1900047	negative regulation of hemostasis	18/3282	49/18862	0.000970011	0.0195415	0.0161057	SERPINE1/THBS1/F12/PROS1/PRKCD/C1QTNF1/APOH/GP1BA/SERPINF2/SH2B3/TSPAN8/TFPI/PRKG1/PLAT/APOE/PLAUR/UBASH3B/SERPING1	18
GO:0043523	regulation of neuron apoptotic process	52/3282	197/18862	0.000974732	0.0195733	0.0161319	FZD9/BTG2/TGFB2/PARP1/LGMN/ALKBH1/TGFB3/SIX4/CPEB4/CASP2/PARK7/PPT1/JUN/NGF/GBA/ATF4/HMOX1/NQO2/HSP90AB1/GRN/CDK5R1/MAP2K4/PRKCI/CX3CR1/MSH2/FOXO3/EPHA7/DDIT3/LRP1/ERBB3/DLX1/NR4A2/FGF8/NRBP2/TRIM2/FBXW7/PRKCG/C5AR1/APOE/AXL/CRLF1/NQO1/TOX3/ITGAM/TERT/POU4F1/PRNP/KCNB1/BACE1/ATM/ARRB1/BDNF	52
GO:0010955	negative regulation of protein processing	12/3282	27/18862	0.000984513	0.0195802	0.0161376	SERPINE1/THBS1/CHAC1/TMEM59/TMEM98/SERPINF2/IL1R2/GAS1/LRRK2/CARD8/GLG1/PRNP	12
GO:1903318	negative regulation of protein maturation	12/3282	27/18862	0.000984513	0.0195802	0.0161376	SERPINE1/THBS1/CHAC1/TMEM59/TMEM98/SERPINF2/IL1R2/GAS1/LRRK2/CARD8/GLG1/PRNP	12
GO:2000278	regulation of DNA biosynthetic process	32/3282	107/18862	0.00100128	0.0197873	0.0163083	HNRNPC/HSP90AA1/TINF2/FGFR4/DUSP1/PPARG/POT1/DNAJC2/CCT6A/CDKN1A/HSP90AB1/POLG2/RFC4/CCT4/TCP1/GJA1/KLF4/TNKS2/ANKRD1/MYC/TERF1/HNRNPD/PARM1/MAPK3/SH2B1/PARN/CCT5/DACH1/RGCC/CCT8/ATM/NAT10	32
GO:0070059	intrinsic apoptotic signaling pathway in response to endoplasmic reticulum stress	21/3282	61/18862	0.00101855	0.019814	0.0163303	AIFM1/CHAC1/ITPR1/PARK7/TXNDC12/ATF4/XBP1/PMAIP1/HSPA1A/ERN1/EIF2AK3/NCK2/APAF1/DDIT3/TMBIM6/LRRK2/TNFRSF10B/BBC3/TRIB3/SERINC3/CASP4	21
GO:0090181	regulation of cholesterol metabolic process	21/3282	61/18862	0.00101855	0.019814	0.0163303	MBTPS2/LDLRAP1/PMVK/SEC14L2/FASN/KPNB1/RAN/ACACB/NFYB/NR1H4/LPCAT3/GPAM/SQLE/ERLIN2/EPHX2/FDFT1/APOE/MBTPS1/HMGCS1/DGAT2/DHCR7	21
GO:0048704	embryonic skeletal system morphogenesis	28/3282	90/18862	0.00103241	0.0199589	0.0164498	MMP14/WDR19/TGFB3/SIX4/HYAL1/SETD2/HOXA1/HOXA2/GLI3/TBX15/SLC39A1/HOXB9/HOXB6/PCGF2/NOG/SHOX2/CHST11/ALX1/HOXC4/TULP3/HOXD4/FGF8/MEGF8/FOXC2/IRX5/IFT140/NIPBL/DSCAML1	28
GO:0034219	carbohydrate transmembrane transport	34/3282	116/18862	0.00104919	0.0202205	0.0166654	GPC3/RNASEL/PRKAG2/SLC5A9/SLC50A1/PEA15/SLC2A11/CLTCL1/SLC25A27/SLC5A10/PRKCI/SLC2A2/RHOQ/NR4A3/SLC27A4/TSC1/HNF1A/APPL2/C2CD5/CREBL2/CAPN10/SORBS1/RTN2/RAB4B/AKT2/SLC27A1/INSR/C3/OCLN/TERT/SLC5A3/TRIB3/SLC23A2/SLC2A10	34
GO:0030204	chondroitin sulfate metabolic process	15/3282	38/18862	0.00107794	0.0206467	0.0170166	CHSY1/HYAL1/CHPF2/XYLT2/DSE/CHST11/CHPF/CHST3/SPOCK2/SPOCK3/NCAN/XYLT1/VCAN/ARSB/HEXB	15
GO:2000058	regulation of ubiquitin-dependent protein catabolic process	44/3282	161/18862	0.00108517	0.0207215	0.0170783	UBQLN2/SMURF1/MAP1A/ARIH1/STYX/HECTD1/MAPK9/CAMLG/RYBP/ARIH2/PARK7/RPL11/RNF19B/PLK3/GBA/RBX1/CSNK1E/RNF144B/HSPA1A/HSPA1B/HSP90AB1/RPL23/TLK2/TRIB2/SOCS5/XPO1/UFL1/MDM2/PRICKLE1/LRRK2/USP5/SUFU/WAC/FBXW7/SIRT2/CSNK2A2/AXIN1/RNF180/PLK2/CDC20B/DAB2/TRIB3/DDRGK1/SVIP	44
GO:0048754	branching morphogenesis of an epithelial tube	40/3282	143/18862	0.0011037	0.0209467	0.0172639	GPC3/MMP14/SLIT2/DLL4/CTSH/AGT/KDM5B/SIX4/FOXA1/PLXND1/DAG1/SMO/GLI3/CTNNBIP1/EPHA2/TACSTD2/RBM15/NOTCH4/SRF/VEGFA/PKHD1/NOG/PTCH1/NRARP/TBX3/GBX2/FGF8/DLG5/MYC/RSPO2/NPNT/FOXC2/FOXD1/COL4A1/GZF1/BMP2/PGR/PAK1/DCHS1/LGR4	40
GO:0008645	hexose transmembrane transport	33/3282	112/18862	0.00111775	0.021149	0.0174306	GPC3/RNASEL/PRKAG2/SLC5A9/SLC50A1/PEA15/SLC2A11/CLTCL1/SLC25A27/SLC5A10/PRKCI/SLC2A2/RHOQ/NR4A3/SLC27A4/TSC1/HNF1A/APPL2/C2CD5/CREBL2/CAPN10/SORBS1/RTN2/RAB4B/AKT2/SLC27A1/INSR/C3/OCLN/TERT/SLC5A3/TRIB3/SLC2A10	33
GO:0042177	negative regulation of protein catabolic process	35/3282	121/18862	0.00115627	0.0216801	0.0178683	F8A1/TIMP1/MAP1A/MDM4/STYX/CAMLG/TIMP4/RYBP/EGFR/PARK7/MAD2L2/ATP13A2/RPL11/MGAT3/TRIM40/HSP90AB1/TIMP2/PHB/CDK5RAP3/RPL23/TLK2/RILP/ATRAID/SUFU/WAC/AZIN1/PRKCG/SIRT2/CSNK2A2/MYCBP2/USP25/CST3/DDRGK1/CTSA/SVIP	35
GO:0036315	cellular response to sterol	11/3282	24/18862	0.00117013	0.021874	0.0180282	DAG1/INSIG1/SMO/INHBA/RORC/MLC1/OSBPL7/PTCH1/INSIG2/HMGCS1/GRAMD1B	11
GO:0017038	protein import	51/3282	194/18862	0.00119441	0.0221947	0.0182925	AIFM1/KPNA7/SNX33/HSP90AA1/NFKBIA/FAM53C/HSPA4/CBLB/PRKCD/SMO/TOMM7/GLI3/PEX10/ZC3H12A/PEX19/NUP50/SAMM50/NUP153/E2F3/PPP1R10/CDKN1A/PEX6/HSP90AB1/KPNB1/RPL23/JUP/KPNA4/RANBP2/RAN/CABP1/APPL2/PRICKLE1/LRRK2/HSPD1/BAG3/SUFU/GPIHBP1/UBR5/APOE/PIK3R2/ELAVL1/MBTPS1/LONP2/NUP155/KPNA3/NXT1/MAVS/PKIG/HSPA8/NUP98/PEX16	51
GO:0061045	negative regulation of wound healing	24/3282	74/18862	0.00120943	0.0224068	0.0184673	SERPINE1/THBS1/F12/SLC12A2/PROS1/PRKCD/CLDN19/CD109/C1QTNF1/APOH/GP1BA/SERPINF2/CLASP2/GJA1/SH2B3/TSPAN8/TFPI/PRKG1/EPPK1/PLAT/APOE/PLAUR/UBASH3B/SERPING1	24
GO:0048568	embryonic organ development	96/3282	412/18862	0.00124241	0.0227972	0.018789	MMP14/WDR19/TGFB2/HLX/VASH1/TGFB3/SIX4/PCDH12/IFT57/IFT122/HYAL1/SETD2/INSIG1/SMO/HOXA1/HOXA2/GLI3/EPHA2/EPHB2/TBX15/NOTCH2/SLC39A1/WNT7B/ATF4/LIF/TTC39C/TSHZ1/FOXC1/SLC44A4/SRF/VEGFA/CCDC40/HOXB9/HOXB6/TBX21/PCGF2/TCAP/KRT19/FZD2/CCDC103/SLC9A3R1/NOG/GGNBP2/SOX15/HES1/EOMES/SHOX2/TRA2B/IFT172/PKDCC/EPAS1/EFEMP1/RSPO3/AHI1/PTCH1/ROR2/PBX3/TPRN/TBX3/SH2B3/CHST11/CEP290/ALX1/E2F7/GLI1/HOXC4/ARID2/T…	96
GO:0001823	mesonephros development	28/3282	91/18862	0.00124751	0.0227972	0.018789	GPC3/SLIT2/SMAD6/KIF26B/AGT/SIX4/SMO/GLI3/CTNNBIP1/TACSTD2/FOXC1/VEGFA/FOXJ1/NOG/HES1/PTCH1/GDF11/FGF8/MYC/NPNT/CRLF1/FOXC2/FOXD1/GZF1/BMP2/DCHS1/LGR4/CAT	28
GO:1903321	negative regulation of protein modification by small protein conjugation or removal	28/3282	91/18862	0.00124751	0.0227972	0.018789	OTUB2/SQSTM1/PRR7/CAMLG/DTX3L/ISG15/PARK7/MAD2L2/RPL11/TSPO/RASD2/HSPA1A/HSPA1B/RPL23/NXN/PRKCE/UFL1/TNFAIP3/DNAJA1/CRY1/PER2/TRIP12/GTPBP4/PARP10/UBR5/PRKCG/DCUN1D3/ARRB1	28
GO:0090092	regulation of transmembrane receptor protein serine/threonine kinase signaling pathway	63/3282	251/18862	0.00124881	0.0227972	0.018789	GPC3/SMURF1/SPRED1/THBS1/RNF111/CILP/SMAD6/TGFB2/PARP1/TGFB3/LOX/NREP/PPARG/HOXA13/INHBA/NOTCH2/TWSG1/RNF165/KIAA0319/HSPA1A/HSP90AB1/CD109/SOST/SMURF2/WFIKKN2/TOB1/NOG/UBB/HES1/VEPH1/SKIL/EMILIN1/LTBP1/RPS27A/SPRED2/UBC/CHST11/LEMD3/INHBC/GDF11/STRAP/DLX1/LRP2/HTRA1/DKK1/PBLD/RBPMS/LTBP4/FKBP8/GDF15/GLG1/ZNF423/TGFB1I1/SH2B1/VASN/CREBBP/FOXD1/DAB2/LATS2/FKBP1A/BMP2/SLC2A10/PMEPA1	63
GO:2001235	positive regulation of apoptotic signaling pathway	36/3282	126/18862	0.00126406	0.0230081	0.0189628	GPER1/STYXL1/THBS1/BMF/AGT/ATF3/MAPK9/PRKCD/CASP2/INHBA/PARK7/RPL11/LCK/SFPQ/FAF1/BCL10/PEA15/BID/PMAIP1/RIPK1/SLC9A3R1/UBB/PAK2/SKIL/NCK2/APAF1/DDIT3/ITM2C/FAS/FBXW7/BBC3/DAPK3/WWOX/CYLD/SERINC3/CTSC	36
GO:0043280	positive regulation of cysteine-type endopeptidase activity involved in apoptotic process	38/3282	135/18862	0.0012766	0.0231686	0.0190952	AIFM1/DDX3X/GPER1/CTSH/PRR7/IFT57/FAM162A/PPARG/CASP2/LCK/BCL10/F3/NGF/PPM1F/BID/BCL2L13/PMAIP1/RIPK1/LGALS9/WDR35/EIF2AK3/SLC1A1/ACER2/TNFSF15/GSN/APAF1/HSPD1/FAS/MYC/TNFRSF10B/DLC1/NLRP12/CARD8/BBC3/NDUFA13/DAP/ARRB1/PIDD1	38
GO:0060675	ureteric bud morphogenesis	20/3282	58/18862	0.00129934	0.0233769	0.0192668	GPC3/KIF26B/AGT/SIX4/SMO/GLI3/CTNNBIP1/TACSTD2/VEGFA/NOG/HES1/PTCH1/FGF8/MYC/NPNT/FOXD1/GZF1/BMP2/DCHS1/LGR4	20
GO:0045017	glycerolipid biosynthetic process	66/3282	266/18862	0.00133408	0.023864	0.0196683	ACSL4/GK/ABHD4/ACHE/PIGG/LPCAT4/ETNK2/DDHD1/ABHD5/AGK/PIK3CD/MFSD2A/PIK3R3/SLC44A3/PIP5K1A/DPM3/CHKB/PISD/MPPE1/ABHD3/PIGN/SLC44A4/AGPAT1/PGAP3/PLSCR3/PLSCR1/PLD1/LIPH/DGKG/SYNJ2/FIG4/PIP5K1B/SLC44A1/AGPAT2/SCARB1/NR1H4/AVIL/DGKA/GPD1/ARF3/LPCAT3/INPP5D/GPAM/GPAA1/AGPAT5/ACSL1/FBXW7/PLA2G12A/MBOAT7/PLEKHA4/PLA2G4C/PIK3R2/SLC27A1/LDLR/C3/CSNK2A2/PIGQ/DGKH/SIK1/SYNJ1/CDS2/LPIN3/PIGT/ATM/DGAT2/PIK3C…	66
GO:1901215	negative regulation of neuron death	51/3282	195/18862	0.00134891	0.0239913	0.0197732	PARP2/FZD9/BTG2/NENF/CHGA/LGMN/ALKBH1/TGFB3/SIX4/CPEB4/GPNMB/PARK7/TNFRSF1B/ATP13A2/PPT1/NGF/GBA/ATF4/HMOX1/HSP90AB1/GRN/MAP2K4/PRKCI/EIF4G1/CX3CR1/MSH2/REL/NR4A3/TSC1/LRP1/ERBB3/LRRK2/CREB1/DLX1/NR4A2/FGF8/NRBP2/SLC7A11/PRKCG/C5AR1/APOE/AXL/CRLF1/TOX3/TERT/POU4F1/SLC23A2/CBL/ARRB1/BTBD10/BDNF	51
GO:1902806	regulation of cell cycle G1/S phase transition	51/3282	195/18862	0.00134891	0.0239913	0.0197732	DDX3X/ZNF655/INO80/BTG2/ATP2B4/MDM4/DACT1/CDC25C/PCBP4/HYAL1/EZH2/CASP2/CNOT4/KMT2E/GPNMB/EGFR/PLK3/CDKN2C/GADD45A/MUC1/MN1/BID/CDKN1A/CDC6/TFDP2/EIF4G1/KLF4/APPL2/E2F7/MDM2/GLI1/ZNF385A/CNOT7/FBXW7/JADE1/ANKRD17/ARID3A/CDK10/E2F4/RBL2/DCUN1D3/PLK2/TERT/MYO16/RGCC/PRMT2/DDRGK1/PLCB1/ATM/WEE1/PIDD1	51
GO:0019218	regulation of steroid metabolic process	35/3282	122/18862	0.00135467	0.023996	0.019777	MBTPS2/AGT/FGFR4/EGR1/INSIG1/H6PD/LDLRAP1/RORC/PMVK/TSPO/SEC14L2/FASN/KPNB1/NR1D1/ABCA2/RAN/ACACB/NFYB/NR1H4/LPCAT3/GPAM/SQLE/ERLIN2/EPHX2/ASAH1/FDFT1/NFKB1/IGFBP7/APOE/MBTPS1/HMGCS1/BMP2/DGAT2/ADM/DHCR7	35
GO:0008090	retrograde axonal transport	10/3282	21/18862	0.00136459	0.023996	0.019777	MAP1A/DYNC1H1/FBXW11/DST/HAP1/KIF1C/KIF5A/KIF1A/KIF5B/DLG2	10
GO:0010801	negative regulation of peptidyl-threonine phosphorylation	10/3282	21/18862	0.00136459	0.023996	0.019777	SPRED1/PPP2R5D/EIF4G1/SPRED2/DDIT4/PARD3/DMTN/CALM3/CADM4/SIRT2	10
GO:2000047	regulation of cell-cell adhesion mediated by cadherin	10/3282	21/18862	0.00136459	0.023996	0.019777	TJP1/FOXA1/DENND6A/MAD2L2/PPM1F/NOTCH4/VEGFA/SERPINF2/EPCAM/RGCC	10
GO:1904659	glucose transmembrane transport	32/3282	109/18862	0.0014073	0.024608	0.0202815	GPC3/RNASEL/PRKAG2/SLC5A9/PEA15/SLC2A11/CLTCL1/SLC25A27/SLC5A10/PRKCI/SLC2A2/RHOQ/NR4A3/SLC27A4/TSC1/HNF1A/APPL2/C2CD5/CREBL2/CAPN10/SORBS1/RTN2/RAB4B/AKT2/SLC27A1/INSR/C3/OCLN/TERT/SLC5A3/TRIB3/SLC2A10	32
GO:1900034	regulation of cellular response to heat	25/3282	79/18862	0.00143264	0.0249809	0.0205888	IER5/HSP90AA1/DNAJC2/CAMK2B/NUP50/NUP153/HSPA1L/HSPA1A/HSPA1B/HSP90AB1/RANBP2/BAG1/FKBP4/BAG3/CAMK2G/DNAJB1/MAPK3/CREBBP/NUP155/HSPH1/HSPA8/ATM/CHORDC1/NUP98/NUP160	25
GO:0030099	myeloid cell differentiation	97/3282	419/18862	0.00146185	0.0254191	0.02095	GPC3/DHRS2/KLF13/THBS1/TMOD3/SIN3A/DYRK3/PARP1/NFKBIA/NDFIP1/HSPA9/LOX/PPARG/MITF/ALAS1/SNRK/KMT2C/CNOT4/KMT2E/LRRC17/INHBA/ISG15/PIK3CD/CTNNBIP1/EPHA2/AGO1/AGO3/JUN/RBM15/TSPAN2/NOTCH2/GBA/BRD1/TNRC6B/LIF/IRF4/RIPK1/TRIM10/HSPA1A/HSPA1B/GLO1/SRF/VEGFA/SMAP1/CD109/FASN/CDK5RAP3/THRA/SLC4A1/JMJD6/GP1BA/BCL6/SLC25A38/DPY30/EPAS1/UFL1/OSTM1/FOXO3/ROR2/NR4A3/SH2B3/ZNF385A/NFE2/INPP5D/CREB1/PRDX3/MYC/…	97
GO:1902930	regulation of alcohol biosynthetic process	24/3282	75/18862	0.00148957	0.0257572	0.0212286	MBTPS2/GPER1/HRH1/PTH1R/H6PD/PMVK/SEC14L2/FASN/KPNB1/P2RY1/RAN/ACACB/NFYB/LPCAT3/GPAM/SQLE/ERLIN2/FDFT1/NFKB1/APOE/MBTPS1/HMGCS1/BMP2/DHCR7	24
GO:0070200	establishment of protein localization to telomere	9/3282	18/18862	0.00154671	0.0264512	0.0218006	POT1/CCT6A/CCT4/TCP1/TERF1/CCT5/TERT/CCT8/ATM	9
GO:0016358	dendrite development	59/3282	234/18862	0.0015581	0.0264894	0.021832	ACSL4/HDAC6/MAP1A/NEDD4/LAMC2/CAMSAP2/SRGAP2/CDKL3/FSTL4/IQSEC1/EZH2/HECW1/CAMK2B/EPHB2/MFSD2A/CELSR2/IGSF9/DCDC2/KIAA0319/CUL7/TANC2/CDK5R1/SARM1/SCARF1/PAK2/TNIK/NLGN1/DGKG/NCK2/NR2E1/TPBG/TMEFF1/LRRK2/KIF1A/OBSL1/KLF7/PRKG1/DLG5/ARC/LZTS1/RAPGEF2/UBA6/SHANK1/APOE/ARHGAP33/CRTC1/MAP1S/PTPRS/EEF2K/MAP1B/PLK2/SLITRK5/TIAM1/BTBD3/PREX1/TRAPPC4/MAP6/CAPRIN1/SHANK2	59
GO:0050654	chondroitin sulfate proteoglycan metabolic process	16/3282	43/18862	0.00156209	0.0264894	0.021832	CHSY1/HYAL1/CHPF2/XYLT2/DSE/CHST11/CHPF/CHST3/SPOCK2/SPOCK3/NCAN/XYLT1/VCAN/ARSB/HEXB/B3GAT3	16
GO:0061138	morphogenesis of a branching epithelium	46/3282	173/18862	0.00157314	0.0264894	0.021832	GPC3/MMP14/SLIT2/DLL4/CTSH/AGT/KDM5B/SIX4/FOXA1/PLXND1/DAG1/SMO/SEMA3C/HOXA13/GLI3/CTNNBIP1/EPHA2/TACSTD2/RBM15/NOTCH4/SRF/VEGFA/PKHD1/NOG/RSPO3/PTCH1/NRARP/TBX3/NTN4/GBX2/FGF8/DLG5/MYC/RSPO2/NPNT/FOXC2/FOXD1/COL4A1/GZF1/BMP2/TGM2/PGR/PAK1/DCHS1/ADM/LGR4	46
GO:0042476	odontogenesis	35/3282	123/18862	0.00158206	0.0264894	0.021832	PHEX/SERPINE1/TGFB2/BCL11B/TGFB3/SLC34A1/SMO/LAMB1/AQP1/INHBA/GLI3/ALPL/TUFT1/FOXC1/SP6/AXIN2/AQP3/DLX1/HTRA1/FGF8/RSPO2/CA2/PITX2/DSPP/ENAM/KLK4/BSG/ANKRD11/SMPD3/ROGDI/FOXO1/TSPEAR/BMP2/RELT/ADM	35
GO:0009259	ribonucleotide metabolic process	98/3282	425/18862	0.00158296	0.0264894	0.021832	ATP6/ATP8/COX2/ACSL4/UPRT/PDK3/PDHA1/TMSB4X/CARD11/DNAJC30/UCK2/ADCY10/PFKFB2/PARP1/GMPR2/SLC26A2/PDHB/PFKFB4/PRKAG2/LRGUK/DLD/PDK4/PGAM2/OGDH/UPP1/EPHA2/HMGCL/PPT1/CTPS1/ACOT11/AK4/PDE4B/DPYD/MAGI3/PMVK/PKLR/NUP50/NUP153/SLC35B2/ELOVL5/FASN/ACLY/SLC4A1/GALK1/PDK2/ACSF2/PIPOX/GMPS/ADCY3/RHOQ/MCEE/RANBP2/NT5E/NPR2/RAN/ACACB/GPD1/ADCY6/LRRK2/GUCY2C/ACSL5/GPAM/NT5C2/ENTPD7/HKDC1/HK1/DDIT4/PFKFB3/NUD…	98
GO:0033866	nucleoside bisphosphate biosynthetic process	22/3282	67/18862	0.00158723	0.0264894	0.021832	ACSL4/PDK3/PDHA1/SLC26A2/PDHB/DLD/PDK4/PPT1/SLC35B2/ELOVL5/FASN/ACLY/PDK2/ACACB/ACSL5/ACSL1/CBR4/TECR/PDPR/ACAT1/PDHX/HSD17B12	22
GO:0034030	ribonucleoside bisphosphate biosynthetic process	22/3282	67/18862	0.00158723	0.0264894	0.021832	ACSL4/PDK3/PDHA1/SLC26A2/PDHB/DLD/PDK4/PPT1/SLC35B2/ELOVL5/FASN/ACLY/PDK2/ACACB/ACSL5/ACSL1/CBR4/TECR/PDPR/ACAT1/PDHX/HSD17B12	22
GO:0034033	purine nucleoside bisphosphate biosynthetic process	22/3282	67/18862	0.00158723	0.0264894	0.021832	ACSL4/PDK3/PDHA1/SLC26A2/PDHB/DLD/PDK4/PPT1/SLC35B2/ELOVL5/FASN/ACLY/PDK2/ACACB/ACSL5/ACSL1/CBR4/TECR/PDPR/ACAT1/PDHX/HSD17B12	22
GO:0072171	mesonephric tubule morphogenesis	20/3282	59/18862	0.00164872	0.0270461	0.0222909	GPC3/KIF26B/AGT/SIX4/SMO/GLI3/CTNNBIP1/TACSTD2/VEGFA/NOG/HES1/PTCH1/FGF8/MYC/NPNT/FOXD1/GZF1/BMP2/DCHS1/LGR4	20
GO:1902893	regulation of pri-miRNA transcription by RNA polymerase II	18/3282	51/18862	0.00165057	0.0270461	0.0222909	APLN/SMAD6/TGFB2/YY1/NR3C1/EGR1/PPARG/GNL3/JUN/SRF/ATOH8/FOXO3/KLF4/TERT/KLF5/BMP2/ETS1/FOSL1	18
GO:0035904	aorta development	19/3282	55/18862	0.00165885	0.0270461	0.0222909	DLL4/SMAD6/LOXL1/TGFB2/HECTD1/LOX/MYLK/PLXND1/ADAMTS9/SRF/HES1/LRP1/PRICKLE1/LRP2/SUFU/FGF8/FOXH1/CHD7/EFEMP2	19
GO:0006086	acetyl-CoA biosynthetic process from pyruvate	8/3282	15/18862	0.00167536	0.0270461	0.0222909	PDK3/PDHA1/PDHB/DLD/PDK4/PDK2/PDPR/PDHX	8
GO:0035751	regulation of lysosomal lumen pH	8/3282	15/18862	0.00167536	0.0270461	0.0222909	ATP6AP2/TMEM175/CLN6/TMEM9/PPT1/GRN/LRRK2/CCDC115	8
GO:0043517	positive regulation of DNA damage response, signal transduction by p53 class mediator	8/3282	15/18862	0.00167536	0.0270461	0.0222909	SPRED1/PMAIP1/DDX5/SPRED2/ZNF385A/PLA2R1/ANKRD1/ATM	8
GO:0060394	negative regulation of pathway-restricted SMAD protein phosphorylation	7/3282	12/18862	0.00167708	0.0270461	0.0222909	SMAD6/NOG/EMILIN1/STRAP/DKK1/PBLD/PMEPA1	7
GO:0071679	commissural neuron axon guidance	7/3282	12/18862	0.00167708	0.0270461	0.0222909	DAG1/SMO/EPHB2/VEGFA/RYK/PTCH1/ROBO3	7
GO:0097201	negative regulation of transcription from RNA polymerase II promoter in response to stress	7/3282	12/18862	0.00167708	0.0270461	0.0222909	JUN/HSPA1A/NCK2/TMBIM6/BAG3/SIRT2/DNAJB1	7
GO:2000050	regulation of non-canonical Wnt signaling pathway	11/3282	25/18862	0.0017636	0.0282221	0.0232601	GPC3/DACT1/CSNK1E/DAAM2/IFT80/RSPO3/DKK1/PLEKHA4/DAB2/TIAM1/SPEF1	11
GO:2000045	regulation of G1/S transition of mitotic cell cycle	46/3282	174/18862	0.00178447	0.0284829	0.023475	DDX3X/ZNF655/INO80/BTG2/MDM4/DACT1/CDC25C/PCBP4/HYAL1/EZH2/CASP2/CNOT4/KMT2E/GPNMB/EGFR/PLK3/CDKN2C/GADD45A/MUC1/BID/CDKN1A/CDC6/TFDP2/EIF4G1/KLF4/APPL2/E2F7/MDM2/ZNF385A/CNOT7/JADE1/ANKRD17/ARID3A/CDK10/E2F4/RBL2/DCUN1D3/PLK2/TERT/MYO16/RGCC/PRMT2/PLCB1/ATM/WEE1/PIDD1	46
GO:0008654	phospholipid biosynthetic process	66/3282	269/18862	0.0018024	0.0286955	0.0236503	ABHD4/ACHE/PIGG/LPCAT4/ETNK2/SPTLC2/DDHD1/ABHD5/AGK/PIK3CD/MFSD2A/PIK3R3/SLC44A3/PIP5K1A/PMVK/DPM3/CHKB/PISD/MPPE1/ABHD3/PIGN/SLC44A4/AGPAT1/PGAP3/ORMDL3/PLSCR3/PLSCR1/PLD1/LIPH/DGKG/SERAC1/SYNJ2/FIG4/NUS1/PIP5K1B/SLC44A1/AGPAT2/ABCA2/NR1H4/DGKA/GPD1/ARF3/LPCAT3/INPP5D/IDH1/GPAM/GPAA1/AGPAT5/PLA2G12A/MBOAT7/PLEKHA4/PLA2G4C/PIK3R2/SLC27A1/CSNK2A2/PIGQ/SERINC5/HEXB/HMGCS1/DGKH/SYNJ1/CDS2/LPIN3/PIGT…	66
GO:0030218	erythrocyte differentiation	33/3282	115/18862	0.00181954	0.0288944	0.0238142	KLF13/TMOD3/DYRK3/HSPA9/ALAS1/KMT2E/INHBA/ISG15/BRD1/TRIM10/HSPA1A/HSPA1B/SRF/VEGFA/SMAP1/CDK5RAP3/THRA/SLC4A1/JMJD6/BCL6/SLC25A38/EPAS1/UFL1/FOXO3/SH2B3/INPP5D/DMTN/ZFP36/KLF1/ZFPM1/PKNOX1/FAM210B/ETS1	33
GO:0030073	insulin secretion	53/3282	207/18862	0.00183026	0.0289907	0.0238936	ACSL4/GPER1/VGF/PFKFB2/CHGA/EFNA5/STXBP5L/RAF1/ITPR1/CACNA1D/PTPRN2/SRI/IL6/PARK7/PIM3/NR1D1/SLC2A2/PRKCE/GJA1/CNR1/HMGN3/PHPT1/HNF1A/NR1H4/LRP1/ITPR2/CACNA1C/CAPN10/PER2/KLF7/DPP4/TCF7L2/MCU/CAMK2G/KIF5B/MAFA/ENY2/RIMS2/TRPM4/CACNA1A/RAB11B/MIDN/SSTR5/OXCT1/PFKL/TIAM1/HNF4A/KCNB1/ARNTL/ABCC8/SYT7/ARL2/ANO1	53
GO:0021543	pallium development	42/3282	156/18862	0.0018978	0.0295436	0.0243493	SLIT2/BTG2/ATP2B4/SRGAP2/EZH2/CNTNAP2/SMO/FOXP2/LAMB1/GLI3/MFSD2A/GNG12/CDH2/SRF/EFHC1/EZH1/CDK5R1/KDM6B/FBXO45/TRA2B/NR2E1/TSC1/LRP1/DLX1/TBR1/BNIP3/FGF8/KIF5B/UBA6/MBOAT7/WDR62/PTPRS/CSNK2A2/BBS2/GART/XRN2/BTBD3/PLCB1/CDON/FEZ1/DIXDC1/TSKU	42
GO:0006695	cholesterol biosynthetic process	23/3282	72/18862	0.00189821	0.0295436	0.0243493	EBP/MBTPS2/INSIG1/PMVK/HSD17B7/SEC14L2/ACAA2/FASN/KPNB1/ACLY/RAN/ACACB/NFYB/LPCAT3/INSIG2/GPAM/SQLE/ERLIN2/FDFT1/APOE/MBTPS1/HMGCS1/DHCR7	23
GO:1902653	secondary alcohol biosynthetic process	23/3282	72/18862	0.00189821	0.0295436	0.0243493	EBP/MBTPS2/INSIG1/PMVK/HSD17B7/SEC14L2/ACAA2/FASN/KPNB1/ACLY/RAN/ACACB/NFYB/LPCAT3/INSIG2/GPAM/SQLE/ERLIN2/FDFT1/APOE/MBTPS1/HMGCS1/DHCR7	23
GO:1903747	regulation of establishment of protein localization to mitochondrion	23/3282	72/18862	0.00189821	0.0295436	0.0243493	YWHAG/TP53BP2/ABLIM3/ARIH2/TOMM7/UBE2J2/LEPROT/UBE2L3/BID/PMAIP1/HSPA1L/USP36/TFDP2/PARL/DNAJA1/LRRK2/BAG3/YWHAZ/BNIP3L/FBXW7/BBC3/UBL5/CSNK2A2	23
GO:0060070	canonical Wnt signaling pathway	79/3282	333/18862	0.00190313	0.0295436	0.0243493	GPC3/PORCN/DDX3X/ATP6AP2/PSMB5/FZD9/TMEM9/DACT1/EGR1/MITF/CDK14/FZD1/GLI3/HECW1/IGFBP1/EGFR/MAD2L2/WNT7B/RBX1/CSNK1E/KREMEN1/CDH2/DAAM2/IGFBP4/JUP/SOST/FZD2/SMURF2/AXIN2/SLC9A3R1/NOG/IFT20/RYK/SIAH2/SOX2/PSME4/TCF7L1/RSPO3/ROR2/GNAQ/KANK1/KLF4/NRARP/SCYL2/DDIT3/GLI1/IGFBP6/PRICKLE1/LRRK2/PTPRO/IGFBP2/NR4A2/TCF7L2/FRAT2/TNKS2/DKK1/FZD8/JRK/RSPO2/FZD6/UBR5/JADE1/NFKB1/TRPM4/PLEKHA4/DACT3/APOE/DAPK3…	79
GO:0097191	extrinsic apoptotic signaling pathway	55/3282	217/18862	0.00194137	0.0299877	0.0247153	DDX3X/PARP2/GPER1/SERPINE1/FGFR3/THBS1/AGT/ATF3/TGFB2/SGPP1/RAF1/CASP2/INHBA/PARK7/TNFRSF1B/FAF1/BCL10/NGF/PEA15/HMOX1/BID/PMAIP1/RIPK1/HSPA1A/HSPA1B/DAXX/PAK2/FAIM/SIAH2/IL12A/SKIL/TNFAIP3/TRAF1/ERBB3/TNFRSF1A/ITM2C/SP100/STRADB/ITGA6/BAG3/TCF7L2/ITPRIP/FAS/DEPTOR/IL7/RB1CC1/FGFR1/TNFRSF10B/TLR3/DAPK3/WWOX/CYLD/TERT/GSTP1/PIDD1	55
GO:1903959	regulation of anion transmembrane transport	32/3282	111/18862	0.00194906	0.0300319	0.0247517	GPC3/THBS1/OAZ2/RNASEL/RGS2/SLC34A1/PRKAG2/PEA15/CLTCL1/RIPK1/SLC25A27/PRKCI/RHOQ/NR4A3/APPL2/C2CD5/CREBL2/CAPN10/PER2/ACSL5/SORBS1/AZIN1/CA2/ACSL1/RTN2/AKT2/INSR/C3/OCLN/TERT/TRIB3/PRNP	32
GO:0060976	coronary vasculature development	16/3282	44/18862	0.0020634	0.0315593	0.0260106	GPC3/APLN/GPER1/SPRED1/SMAD6/PLXND1/SETD2/SRF/VEGFA/ARID2/PRICKLE1/LRP2/SUFU/MEGF8/DYNC2H1/APLNR	16
GO:0031114	regulation of microtubule depolymerization	12/3282	29/18862	0.00208916	0.0317587	0.0261749	HDAC6/MAP1A/CAMSAP2/CLASP2/CAMSAP1/TRPV4/NAV3/MAP1S/KATNB1/MAP1B/TPX2/SPEF1	12
GO:0034311	diol metabolic process	12/3282	29/18862	0.00208916	0.0317587	0.0261749	QDPR/SPTLC2/SGPP1/GCH1/AGK/GBA/SPR/SPTLC1/ACER2/ABCA2/ASAH1/SPTLC3	12
GO:0031346	positive regulation of cell projection organization	81/3282	344/18862	0.00209981	0.0317587	0.0261749	PLXNB3/STYXL1/SLIT2/LTK/MNS1/ISLR2/SEMA7A/ABL2/RGS2/TGFB3/NIN/FBXO38/CDKL3/PLXND1/BRK1/ZMYND10/PLXNB1/EZH2/CREB3L2/FZD1/ANLN/RALA/CAMK2B/CROCC/MACF1/NGF/CUL7/SRF/VEGFA/MIEN1/HAP1/GRN/PLEKHM1/TRPV2/ATP1B2/SCARF1/SHOX2/PRKCI/SKIL/NLGN1/GOLGA4/CDC42EP3/RHOQ/TIAM2/FUT9/CNR1/ROR2/AVIL/LRP1/OBSL1/VIL1/FN1/ITGA6/ANKRD1/RAPGEF2/SCARB2/CEP135/EPS8L1/AP2A1/APOE/MEGF8/CRTC1/KATNB1/EEF2K/METRN/ARSB/ENC1/MAP1…	81
GO:0045540	regulation of cholesterol biosynthetic process	17/3282	48/18862	0.00210704	0.0317587	0.0261749	MBTPS2/PMVK/SEC14L2/FASN/KPNB1/RAN/ACACB/NFYB/LPCAT3/GPAM/SQLE/ERLIN2/FDFT1/APOE/MBTPS1/HMGCS1/DHCR7	17
GO:0106118	regulation of sterol biosynthetic process	17/3282	48/18862	0.00210704	0.0317587	0.0261749	MBTPS2/PMVK/SEC14L2/FASN/KPNB1/RAN/ACACB/NFYB/LPCAT3/GPAM/SQLE/ERLIN2/FDFT1/APOE/MBTPS1/HMGCS1/DHCR7	17
GO:2001238	positive regulation of extrinsic apoptotic signaling pathway	17/3282	48/18862	0.00210704	0.0317587	0.0261749	GPER1/THBS1/AGT/ATF3/INHBA/FAF1/BCL10/PEA15/BID/PMAIP1/RIPK1/PAK2/SKIL/ITM2C/DAPK3/WWOX/CYLD	17
GO:0006085	acetyl-CoA biosynthetic process	10/3282	22/18862	0.00211453	0.0317946	0.0262045	PDK3/PDHA1/PDHB/DLD/PDK4/ACLY/PDK2/PDPR/ACAT1/PDHX	10
GO:0001658	branching involved in ureteric bud morphogenesis	18/3282	52/18862	0.00211966	0.031795	0.0262048	GPC3/AGT/SIX4/SMO/GLI3/CTNNBIP1/TACSTD2/VEGFA/NOG/PTCH1/FGF8/MYC/NPNT/FOXD1/GZF1/BMP2/DCHS1/LGR4	18
GO:0030072	peptide hormone secretion	61/3282	247/18862	0.00222661	0.033239	0.0273949	APLN/ACSL4/GPER1/TFR2/VGF/PFKFB2/CHGA/EFNA5/STXBP5L/RAF1/ITPR1/CACNA1D/PTPRN2/SRI/IL6/EGFR/PARK7/PIM3/NR1D1/CRHR1/SLC2A2/PRKCE/SLC16A10/GJA1/CNR1/HMGN3/PHPT1/HNF1A/NR1H4/LRP1/ITPR2/CACNA1C/CAPN10/PER2/KLF7/DPP4/TCF7L2/MCU/CAMK2G/KIF5B/MAFA/ENY2/RIMS2/CHD7/TRPM4/LTBP4/CACNA1A/RAB11B/MIDN/SMPD3/SSTR5/OXCT1/PFKL/TIAM1/HNF4A/KCNB1/ARNTL/ABCC8/SYT7/ARL2/ANO1	61
GO:0030902	hindbrain development	38/3282	139/18862	0.00226606	0.033656	0.0277386	ND4/COX1/HERC1/ARL13B/EZH2/SMO/HOXA2/PTBP2/GBA/NCSTN/SSTR3/FOXC1/HAP1/NOG/CDK5R1/ATP1B2/HES1/AHI1/AGTPBP1/CEP290/GLI1/GBX2/TBR1/NANOS1/EGR2/DLC1/HNRNPD/ATF5/C5AR1/PTPRS/RPGRIP1L/ZNF423/MYO16/POU4F1/GART/FZD4/PAK1/SPTBN2	38
GO:0070301	cellular response to hydrogen peroxide	27/3282	90/18862	0.00227288	0.033656	0.0277386	HDAC6/PRKCD/EZH2/IL6/AQP1/PARK7/RIPK1/PCGF2/ERN1/KDM6B/RHOB/IL18RAP/TNFAIP3/NR4A3/KLF4/PAWR/LRRK2/ANKZF1/BNIP3/PPIF/ZNF580/AXL/SMPD3/NQO1/FOXO1/OSER1/ETS1	27
GO:0006913	nucleocytoplasmic transport	80/3282	340/18862	0.00227454	0.033656	0.0277386	SMURF1/KPNA7/NEDD4/DHX9/PTPN14/STYX/NFKBIA/RGS14/HSPA9/FAM53C/CBLB/PRKCD/SETD2/SMO/GLI3/PARK7/ZC3H12A/DDX20/NUP50/RANGAP1/ATXN1/NUP153/E2F3/PPP1R10/SRSF3/CDKN1A/XPO5/HSP90AB1/ALYREF/KPNB1/RPL23/JUP/SUPT6H/GEMIN4/KPNA4/SRSF7/XPO1/SNRPG/RANBP2/BACH2/NOL6/TSC1/RAN/CABP1/APPL2/PPP1R12A/PRICKLE1/LRRK2/DUSP16/SP100/AGFG1/STRADB/IWS1/BAG3/TCF7L2/SUFU/EGR2/ENY2/UBR5/ABCE1/SDAD1/YTHDC1/PIK3R2/ELAVL1/MBTPS…	80
GO:0021782	glial cell development	32/3282	112/18862	0.00228158	0.033656	0.0277386	HDAC11/DAG1/LAMB2/SMO/IL6/EGFR/MXRA8/TSPAN2/PHGDH/NCSTN/HDAC10/TTBK1/NR1D1/GRN/ITGB4/ASPA/ROR2/GSN/ABCA2/EIF2B1/LRP1/PARD3/NDRG1/ARHGEF10/C5AR1/PRX/AKT2/SIRT2/LDLR/BACE2/MYRF/GSTP1	32
GO:0051261	protein depolymerization	32/3282	112/18862	0.00228158	0.033656	0.0277386	HDAC6/MAP1A/TMOD3/CCSAP/CAMSAP2/MICAL3/FLII/CLASP2/CAPG/GSN/CAMSAP1/TRPV4/NAV3/AVIL/LIMA1/VIL1/ADD3/DMTN/MAP1S/SH3GL1/KATNB1/MAP1B/KIF2A/SYNJ1/TPX2/SPEF1/STMN3/HSPA8/MICAL2/KIF18A/CKAP5/SPTBN2	32
GO:1903844	regulation of cellular response to transforming growth factor beta stimulus	36/3282	130/18862	0.00229416	0.0337616	0.0278257	SMURF1/SPRED1/THBS1/RNF111/SMAD6/TGFB3/LOX/NREP/HSPA1A/HSP90AB1/CD109/SMURF2/WFIKKN2/UBB/VEPH1/SKIL/EMILIN1/LTBP1/RPS27A/SPRED2/UBC/CHST11/LEMD3/STRAP/DLX1/HTRA1/PBLD/LTBP4/GLG1/TGFB1I1/VASN/CREBBP/DAB2/LATS2/SLC2A10/PMEPA1	36
GO:0031112	positive regulation of microtubule polymerization or depolymerization	13/3282	33/18862	0.00233786	0.0341624	0.028156	NIN/HSPA1A/HSPA1B/CDK5R1/CLIP1/TRPV4/NAV3/KATNB1/MAP1B/OCLN/PAK1/CKAP5/ARL2	13
GO:0030512	negative regulation of transforming growth factor beta receptor signaling pathway	26/3282	86/18862	0.0024086	0.0351137	0.02894	SMURF1/SPRED1/SMAD6/TGFB3/HSPA1A/CD109/SMURF2/WFIKKN2/UBB/VEPH1/SKIL/EMILIN1/LTBP1/RPS27A/SPRED2/UBC/CHST11/LEMD3/STRAP/HTRA1/PBLD/GLG1/TGFB1I1/VASN/SLC2A10/PMEPA1	26
GO:0072088	nephron epithelium morphogenesis	22/3282	69/18862	0.00242057	0.0352058	0.0290159	GPC3/KIF26B/AGT/SIX4/SMO/GLI3/CTNNBIP1/TACSTD2/LIF/VEGFA/NOG/HES1/AHI1/PTCH1/FGF8/MYC/NPNT/FOXD1/GZF1/BMP2/DCHS1/LGR4	22
GO:0048562	embryonic organ morphogenesis	67/3282	277/18862	0.0024406	0.0354143	0.0291878	MMP14/WDR19/HLX/TGFB3/SIX4/IFT57/HYAL1/SETD2/INSIG1/SMO/HOXA1/HOXA2/GLI3/EPHA2/EPHB2/TBX15/NOTCH2/SLC39A1/TTC39C/TSHZ1/SLC44A4/SRF/CCDC40/HOXB9/HOXB6/TBX21/PCGF2/TCAP/FZD2/CCDC103/SLC9A3R1/NOG/HES1/EOMES/SHOX2/IFT172/EFEMP1/AHI1/ROR2/TPRN/TBX3/CHST11/CEP290/ALX1/GLI1/HOXC4/TULP3/GBX2/HOXD4/MYO3B/TBR1/SUFU/FGF8/FOXH1/FZD6/CHD7/MEGF8/HPN/FOXC2/IRX5/MAPK3/IFT140/NIPBL/ATP8A2/DSCAML1/MICAL2/USH1C	67
GO:0007219	Notch signaling pathway	48/3282	186/18862	0.00245837	0.0355066	0.0292639	MMP14/DLL4/CHAC1/CD46/TGFB2/FOXA1/NFKBIA/DTX3L/PLXND1/TIMP4/GALNT11/PGAM2/EGFR/SPEN/RBM15/NOTCH2/NCSTN/FOXC1/GMDS/NOTCH4/KRT19/LLGL2/HES7/HES1/BCL6/PRKCI/IFT172/AAK1/ANXA4/EGFL7/NRARP/NR1H4/DTX3/DLX1/TSPAN15/MYC/SORBS2/FBXW7/FOXC2/ZNF423/CREBBP/CDH6/TSPEAR/POFUT1/BMP2/SLC35C2/MAML2/ARRB1	48
GO:0042593	glucose homeostasis	57/3282	229/18862	0.00252334	0.0362767	0.0298986	PDK3/GPER1/VGF/SIN3A/FOXA1/FGFR4/EFNA5/STXBP5L/RAF1/PPARG/PTPRN2/SRI/PDK4/IL6/PARK7/LEPR/CRTC2/PIM3/LGALS1/XBP1/SRF/NR1D1/ERN1/PDK2/PLSCR3/TRA2B/WDR35/PRKCE/CNR1/HMGN3/PTCH1/PHPT1/HNF1A/CRY1/APPL2/NR1H4/LRP1/KLF7/TCF7L2/HKDC1/HK1/MCU/KIF5B/ENY2/TRPM4/PIK3R2/RAB11B/INSR/SSTR5/OXCT1/GAS6/FOXO1/BACE2/TIAM1/HNF4A/KCNB1/ANO1	57
GO:0001843	neural tube closure	25/3282	82/18862	0.00254677	0.0365292	0.0301067	TGFB2/IFT57/IFT122/SETD2/RALA/MTHFR/PRKACB/BCL10/CECR2/BRD2/FZD2/NOG/IFT172/PTCH1/TSC1/APAF1/PRICKLE1/TULP3/LRP2/SUFU/FZD6/DLC1/SHROOM3/VASP/ADM	25
GO:0060390	regulation of SMAD protein signal transduction	11/3282	26/18862	0.00258095	0.0368442	0.0303663	CILP/PARP1/TGFB3/KIAA0319/TOB1/VEPH1/PBLD/RBPMS/SH2B1/DAB2/SLC2A10	11
GO:1903961	positive regulation of anion transmembrane transport	20/3282	61/18862	0.00258981	0.0368442	0.0303663	GPC3/RNASEL/SLC34A1/CLTCL1/PRKCI/RHOQ/NR4A3/C2CD5/CREBL2/CAPN10/ACSL5/SORBS1/AZIN1/CA2/ACSL1/AKT2/INSR/C3/OCLN/TERT	20
GO:0033865	nucleoside bisphosphate metabolic process	38/3282	140/18862	0.00259833	0.0368442	0.0303663	ACSL4/PDK3/PDHA1/SLC26A2/PDHB/DLD/PDK4/OGDH/HMGCL/PPT1/ACOT11/PMVK/SLC35B2/ELOVL5/FASN/ACLY/PDK2/ACSF2/PIPOX/MCEE/ACACB/ACSL5/GPAM/ACSL1/AADAT/CBR4/SULT1E1/TECR/PDPR/ACSM3/ACSM5/MCCC2/HMGCS1/ACAT1/DGAT2/PDHX/HSD17B12/GLYAT	38
GO:0033875	ribonucleoside bisphosphate metabolic process	38/3282	140/18862	0.00259833	0.0368442	0.0303663	ACSL4/PDK3/PDHA1/SLC26A2/PDHB/DLD/PDK4/OGDH/HMGCL/PPT1/ACOT11/PMVK/SLC35B2/ELOVL5/FASN/ACLY/PDK2/ACSF2/PIPOX/MCEE/ACACB/ACSL5/GPAM/ACSL1/AADAT/CBR4/SULT1E1/TECR/PDPR/ACSM3/ACSM5/MCCC2/HMGCS1/ACAT1/DGAT2/PDHX/HSD17B12/GLYAT	38
GO:0034032	purine nucleoside bisphosphate metabolic process	38/3282	140/18862	0.00259833	0.0368442	0.0303663	ACSL4/PDK3/PDHA1/SLC26A2/PDHB/DLD/PDK4/OGDH/HMGCL/PPT1/ACOT11/PMVK/SLC35B2/ELOVL5/FASN/ACLY/PDK2/ACSF2/PIPOX/MCEE/ACACB/ACSL5/GPAM/ACSL1/AADAT/CBR4/SULT1E1/TECR/PDPR/ACSM3/ACSM5/MCCC2/HMGCS1/ACAT1/DGAT2/PDHX/HSD17B12/GLYAT	38
GO:2001236	regulation of extrinsic apoptotic signaling pathway	41/3282	154/18862	0.0026655	0.0377108	0.0310805	DDX3X/GPER1/SERPINE1/THBS1/AGT/ATF3/RAF1/INHBA/PARK7/FAF1/BCL10/PEA15/HMOX1/BID/PMAIP1/RIPK1/HSPA1A/HSPA1B/PAK2/FAIM/SIAH2/SKIL/TNFAIP3/TRAF1/ITM2C/SP100/STRADB/ITGA6/TCF7L2/ITPRIP/FAS/DEPTOR/IL7/RB1CC1/FGFR1/TNFRSF10B/DAPK3/WWOX/CYLD/TERT/GSTP1	41
GO:0016126	sterol biosynthetic process	24/3282	78/18862	0.002686	0.0379147	0.0312486	EBP/MBTPS2/INSIG1/PRKAG2/PMVK/HSD17B7/SEC14L2/ACAA2/FASN/KPNB1/ACLY/RAN/ACACB/NFYB/LPCAT3/INSIG2/GPAM/SQLE/ERLIN2/FDFT1/APOE/MBTPS1/HMGCS1/DHCR7	24
GO:0001706	endoderm formation	18/3282	53/18862	0.00269567	0.0379651	0.0312901	MMP14/DUSP1/COL8A1/SETD2/LAMB1/INHBA/COL12A1/NOG/EOMES/SOX2/FN1/COL5A2/DUSP5/DKK1/DUSP4/COL6A1/ITGB2/CTR9	18
GO:0006654	phosphatidic acid biosynthetic process	17/3282	49/18862	0.00271109	0.0380942	0.0313966	ABHD4/LPCAT4/DDHD1/ABHD5/AGPAT1/PLD1/LIPH/DGKG/AGPAT2/NR1H4/DGKA/GPD1/GPAM/AGPAT5/PLA2G12A/SLC27A1/DGKH	17
GO:1901987	regulation of cell cycle phase transition	107/3282	478/18862	0.00278823	0.0388704	0.0320363	BRCC3/CETN2/FOXO4/DDX3X/PSMB5/ZNF655/YWHAG/INO80/TMOD3/SIN3A/BTG2/ATP2B4/MDM4/DYRK3/DTL/CENPF/HSP90AA1/DYNC1H1/HSPA2/DACT1/UIMC1/DUSP1/HMMR/CDC25C/PCBP4/HYAL1/CDC25A/KLHL18/PAXIP1/SMARCD3/EZH2/CASP2/CNOT4/CEP41/KMT2E/DBF4/GPNMB/ANLN/EGFR/MAD2L2/MIIP/PLK3/CDKN2C/ORC1/GADD45A/CDC14A/MUC1/RBX1/CSNK1E/MN1/BID/CEP76/CDKN1A/ANAPC11/CDK5RAP3/CDC6/CDC27/TEX14/RAD51C/ZNF207/TFDP2/EIF4G1/PSME4/BUB1/CEP78/K…	107
GO:0051092	positive regulation of NF-kappaB transcription factor activity	42/3282	159/18862	0.00279151	0.0388704	0.0320363	CARD11/AGT/DHX9/IRAK2/CTH/BCL10/LAMTOR5/RIPK1/TRIM38/TRIM15/HSPA1A/HSPA1B/CARD14/FLOT2/LGALS9/UBB/DHX33/IL1RAP/PRKCI/CX3CR1/RPS27A/IL18RAP/MAP3K7/TRIM14/TRIM32/TRAF1/UBC/PRDX3/NFKB2/MTDH/RIPK2/IKBKB/TLR3/NFKB1/ITGB2/DDRGK1/UBE2V1/TRIM6/TRIM5/CAT/RPS6KA4/PIDD1	42
GO:0046323	glucose import	23/3282	74/18862	0.00282446	0.0391588	0.0322739	GPC3/RNASEL/PRKAG2/PEA15/CLTCL1/SLC25A27/PRKCI/RHOQ/SLC27A4/TSC1/HNF1A/APPL2/CREBL2/CAPN10/SORBS1/RTN2/RAB4B/AKT2/SLC27A1/INSR/OCLN/TERT/SLC2A10	23
GO:0032239	regulation of nucleobase-containing compound transport	8/3282	16/18862	0.00284236	0.0393053	0.0323947	DHX9/ADORA1/SETD2/RIPK1/NUP153/SUPT6H/IWS1/NSUN2	8
GO:0017015	regulation of transforming growth factor beta receptor signaling pathway	35/3282	127/18862	0.00285434	0.0393103	0.0323988	SMURF1/SPRED1/THBS1/RNF111/SMAD6/TGFB3/LOX/NREP/HSPA1A/HSP90AB1/CD109/SMURF2/WFIKKN2/UBB/VEPH1/SKIL/EMILIN1/LTBP1/RPS27A/SPRED2/UBC/CHST11/LEMD3/STRAP/HTRA1/PBLD/LTBP4/GLG1/TGFB1I1/VASN/CREBBP/DAB2/LATS2/SLC2A10/PMEPA1	35
GO:0031398	positive regulation of protein ubiquitination	33/3282	118/18862	0.00287334	0.0394433	0.0325084	DDX3X/ARRDC4/RNF111/MTA1/MAPK9/NDFIP1/CBLB/PAXIP1/BCL10/RBX1/UBE2L3/CDK5RAP3/UBB/PELI1/TOPORS/CRY1/PRICKLE1/LRRK2/BMI1/RIPK2/FBXW7/UBE2S/DCUN1D3/AXIN1/ARRDC3/RNF180/CDC20B/NDFIP2/MYCBP2/FKBP1A/TRIB3/ARRB1/CTR9	33
GO:0006029	proteoglycan metabolic process	26/3282	87/18862	0.00287667	0.0394433	0.0325084	HS6ST2/CHSY1/CHST14/GLCE/HYAL1/CHPF2/EXTL2/SGSH/XYLT2/HS3ST3B1/HS3ST5/DSE/CHST11/CHPF/TCF7L2/CHST3/SPOCK2/SPOCK3/NCAN/XYLT1/VCAN/ARSB/HEXB/BMP2/SLC2A10/B3GAT3	26
GO:0009150	purine ribonucleotide metabolic process	93/3282	408/18862	0.00293466	0.0400058	0.032972	ATP6/ATP8/COX2/ACSL4/PDK3/PDHA1/TMSB4X/CARD11/DNAJC30/ADCY10/PFKFB2/PARP1/GMPR2/SLC26A2/PDHB/PFKFB4/PRKAG2/LRGUK/DLD/PDK4/PGAM2/OGDH/EPHA2/HMGCL/PPT1/ACOT11/AK4/PDE4B/MAGI3/PMVK/PKLR/NUP50/NUP153/SLC35B2/ELOVL5/FASN/ACLY/SLC4A1/GALK1/PDK2/ACSF2/PIPOX/GMPS/ADCY3/RHOQ/MCEE/RANBP2/NT5E/NPR2/RAN/ACACB/GPD1/ADCY6/LRRK2/GUCY2C/ACSL5/GPAM/NT5C2/ENTPD7/HKDC1/HK1/DDIT4/PFKFB3/NUDT18/ACSL1/AADAT/CBR4/SULT1…	93
GO:0060148	positive regulation of posttranscriptional gene silencing	12/3282	30/18862	0.00293697	0.0400058	0.032972	DHX9/IL6/EGFR/PUM1/TNRC6B/RIPK1/XPO5/DDX5/EIF4G1/PUM2/AGO2/ZFP36	12
GO:2001020	regulation of response to DNA damage stimulus	55/3282	221/18862	0.00297695	0.0404619	0.0333479	BRCC3/USP51/KLHL15/SPRED1/DHX9/DYRK3/PARP1/OTUB2/UIMC1/POLQ/PARP9/DTX3L/PRKCD/SETD2/PAXIP1/POT1/EGFR/MAD2L2/MUC1/HDAC10/TFIP11/MIF/BID/SMCHD1/PMAIP1/PPP1R10/IER3/DDX5/AXIN2/RECQL5/FXR2/SKIL/SPRED2/HNRNPK/TRIM32/CRY1/MDM2/HELB/ZNF385A/ARID2/DDX11/TRIP12/PLA2R1/MGMT/ANKRD1/MYC/UBR5/PRKCG/TMEM161A/SMG1/NUDT16L1/TPT1/DYRK1A/UBE2V1/ATM	55
GO:0010977	negative regulation of neuron projection development	36/3282	132/18862	0.00303784	0.0410231	0.0338104	MCF2/SEMA7A/TNR/RAB29/SPOCK1/CDKL3/FSTL4/SEMA3B/SEMA3C/EPHB2/SEMA6C/SEMA4A/LGALS1/KREMEN1/KIAA0319/CDK5R1/EFNB3/RYK/NLGN1/EPHA7/KANK1/TSC1/TRPV4/LRP1/DIP2B/ADCY6/LRRK2/PTPRO/FKBP4/ITM2C/SPP1/APOE/PTPRS/EFNB2/TSKU/DENND5A	36
GO:0060606	tube closure	25/3282	83/18862	0.00305292	0.0410231	0.0338104	TGFB2/IFT57/IFT122/SETD2/RALA/MTHFR/PRKACB/BCL10/CECR2/BRD2/FZD2/NOG/IFT172/PTCH1/TSC1/APAF1/PRICKLE1/TULP3/LRP2/SUFU/FZD6/DLC1/SHROOM3/VASP/ADM	25
GO:0007042	lysosomal lumen acidification	6/3282	10/18862	0.00305805	0.0410231	0.0338104	ATP6AP2/CLN6/TMEM9/PPT1/GRN/CCDC115	6
GO:0040015	negative regulation of multicellular organism growth	6/3282	10/18862	0.00305805	0.0410231	0.0338104	LGMN/PTCH1/SOCS2/ADRB1/GDF15/BBS2	6
GO:0046487	glyoxylate metabolic process	6/3282	10/18862	0.00305805	0.0410231	0.0338104	IDH2/ALDH4A1/GRHPR/IDH1/HOGA1/PRODH2	6
GO:2000048	negative regulation of cell-cell adhesion mediated by cadherin	6/3282	10/18862	0.00305805	0.0410231	0.0338104	MAD2L2/PPM1F/NOTCH4/VEGFA/EPCAM/RGCC	6
GO:0015801	aromatic amino acid transport	7/3282	13/18862	0.00308963	0.0410231	0.0338104	SLC38A5/SLC7A8/SLC38A3/SLC16A10/SLC7A5/SLC36A4/SLC3A2	7
GO:0032530	regulation of microvillus organization	7/3282	13/18862	0.00308963	0.0410231	0.0338104	PODXL/RAP1GAP/ATP8B1/PLD1/VIL1/KLF5/USH1C	7
GO:0042921	glucocorticoid receptor signaling pathway	7/3282	13/18862	0.00308963	0.0410231	0.0338104	NEDD4/NR3C1/ARID1A/PHB/PER1/CRY1/ARNTL	7
GO:0060213	positive regulation of nuclear-transcribed mRNA poly(A) tail shortening	7/3282	13/18862	0.00308963	0.0410231	0.0338104	BTG2/TNRC6B/TOB1/AGO2/PABPC1/CNOT7/ZFP36	7
GO:0010721	negative regulation of cell development	45/3282	174/18862	0.00314514	0.0416564	0.0343324	MCF2/IDH2/PRTG/SEMA7A/TNR/DUSP10/TRIM11/DIO3/SPRY4/CDKL3/FSTL4/EFNA5/SEMA3B/SEMA3C/IL6/EPHB2/TACSTD2/SEMA6C/SEMA4A/FBLN1/TSPO/KIAA0319/DAAM2/VEGFA/NR1D1/NOG/TMEM98/CDK5R1/EFNB3/HES1/RYK/NR2E1/EPHA7/KANK1/NPR2/APPL2/DIP2B/DLX1/DMTN/RAPGEF2/FBXW7/SPP1/SIRT2/LDLR/PTPRS	45
GO:0000715	nucleotide-excision repair, DNA damage recognition	10/3282	23/18862	0.00316326	0.0417188	0.0343838	CETN2/COPS6/COPS2/PARP1/RBX1/COPS3/UBB/RPS27A/UBC/COPS7B	10
GO:0006099	tricarboxylic acid cycle	13/3282	34/18862	0.00318993	0.0418401	0.0344838	IDH3G/PDHA1/IDH2/PDHB/DLD/OGDH/SDHB/ME2/IDH1/MDH1B/FAHD1/NNT/IDH3B	13
GO:0030516	regulation of axon extension	27/3282	92/18862	0.00320606	0.0418401	0.0344838	ISLR2/SEMA7A/SIN3A/TNR/CDKL3/SEMA3B/SEMA3C/MACF1/SEMA6C/SEMA4A/KIAA0319/SRF/VEGFA/CDK5R1/TRPV2/RYK/GOLGA4/LRP1/DIP2B/FN1/DPYSL2/APOE/MEGF8/PTPRS/MAP1B/CDH4/PAK1	27
GO:0032088	negative regulation of NF-kappaB transcription factor activity	27/3282	92/18862	0.00320606	0.0418401	0.0344838	TMSB4X/TRAF3/NFKBIA/IRAK2/ZC3H12A/FAF1/TRIM40/PKHD1/CDK5RAP3/FOXJ1/PELI1/ANXA4/UFL1/TNFAIP3/KLF4/NR1H4/DDIT3/PARP10/NLRP12/CARD8/NFKBIB/NWD1/CYLD/DAP/PRMT2/ARRB1/CAT	27
GO:1903322	positive regulation of protein modification by small protein conjugation or removal	37/3282	137/18862	0.00321661	0.04189	0.0345249	DDX3X/ARRDC4/RNF111/MTA1/MAPK9/NDFIP1/CBLB/GNL3/PAXIP1/ZC3H12A/BCL10/RBX1/RASD2/UBE2L3/CDK5RAP3/UBB/PELI1/TOPORS/CRY1/PRICKLE1/LRRK2/BMI1/RIPK2/FBXW7/UBE2S/UBA2/DCUN1D3/AXIN1/ARRDC3/RNF180/CDC20B/NDFIP2/MYCBP2/FKBP1A/TRIB3/ARRB1/CTR9	37
GO:0033108	mitochondrial respiratory chain complex assembly	29/3282	101/18862	0.00329517	0.0427219	0.0352106	ND6/ND5/ND4/ND3/ND2/ND1/AIFM1/NDUFB11/NDUFA2/NDUFA5/SLC25A33/SAMM50/NDUFA6/NDUFB5/NDUFA8/NDUFA10/NDUFB8/NDUFAF6/NDUFC1/NDUFA13/NDUFB7/ECSIT/NDUFA7/PET100/NDUFB10/NDUFS4/NDUFAF5/NDUFC2/NDUFV1	29
GO:0071560	cellular response to transforming growth factor beta stimulus	61/3282	251/18862	0.00330108	0.0427219	0.0352106	USP9X/SMURF1/SPRED1/THBS1/RNF111/CILP/SMAD6/TGFB2/PARP1/TGFB3/LTBP2/NR3C1/LOX/NREP/ZYX/JUN/F11R/TWSG1/HSPA1A/HSP90AB1/CD109/SMURF2/WFIKKN2/UBB/VEPH1/SKIL/CX3CR1/EMILIN1/LTBP1/RPS27A/SPRED2/MAP3K7/UBC/APPL2/CHST11/APAF1/LEMD3/USP15/STRAP/CREB1/DLX1/HTRA1/ANKRD1/PBLD/PARD3/FOXH1/LTBP4/GDF15/WWOX/PARD6A/GLG1/TGFB1I1/VASN/CREBBP/DAB2/LATS2/SLC2A10/PMEPA1/CBL/LPXN/LTBP3	61
[truncated: 675 more rows]

## Sheet: BP_DEGs_B.1.351
ID	Description	GeneRatio	BgRatio	pvalue	p.adjust	qvalue	geneID	Count
[truncated: 849 more rows]

## Sheet: BP_Upregulated_B.1
ID	Description	GeneRatio	BgRatio	pvalue	p.adjust	qvalue	geneID	Count
[truncated: 1,214 more rows]

## Sheet: BP_Upregulated_B.1.1.7
ID	Description	GeneRatio	BgRatio	pvalue	p.adjust	qvalue	geneID	Count
[truncated: 1,000 more rows]

[truncated: 11 more sheets: BP_Upregulated_B.1.351, BP_Downregulated_B.1, BP_Downregulated_B.1.1.7, BP_Downregulated_B.1.351, EnrichrCov2Sets_B.1, EnrichrCov2Sets_B.1.1.7, EnrichrCov2Sets_B.1.351, GOBP_HBEd4up, GOBP_HBEd4dw, GOBP_HBEd7up, GOBP_HBEd7dw]
