# Supplementary material for: Global loss of cellular m6A RNA methylation following infection with different SARS-CoV-2 variants
Source: bioRxiv preprint, doi:10.1101/2022.12.08.519593, version 1 (2022-12-09)
Supplement: Supplemental Data S3 [file 519593_file06.xlsx]

## Sheet: Peaks Non-infected Vero
name_macs2	peakAnn_gene_name	pileup_macs2	fold_enrichment_macs2	-log10(qvalue)_macs2	short_annotation	condition
peaks_nodup_uniq_vero_infectedAll_rev_peak_2	RIC8A	33.44	4.92016	9.8045	promoter-tss	vero
peaks_nodup_uniq_vero_infectedAll_rev_peak_4	IFITM3	20.2	3.02914	2.40412	intergenic	vero
peaks_nodup_uniq_vero_infectedAll_rev_peak_6	IFITM3	13.93	4.39229	3.02571	intergenic	vero
peaks_nodup_uniq_vero_infectedAll_rev_peak_7	B4GALNT4	20.2	3.02914	2.40412	intergenic	vero
peaks_nodup_uniq_vero_infectedAll_rev_peak_8	SIGIRR	15.33	5.44239	5.2993	intron	vero
peaks_nodup_uniq_vero_infectedAll_rev_peak_9	RASSF7	34.83	2.23966	1.84628	promoter-tss	vero
peaks_nodup_uniq_vero_infectedAll_rev_peak_10	LOC103222129	32.05	3.00434	4.31085	exon	vero
peaks_nodup_uniq_vero_infectedAll_rev_peak_11	PHRF1	12.54	4.51347	3.09663	intergenic	vero
peaks_nodup_uniq_vero_infectedAll_rev_peak_12	SCT	4.88	4.89736	2.25618	promoter-tss	vero
peaks_nodup_uniq_vero_infectedAll_rev_peak_15	SLC25A22	9.75	4.23373	1.97788	promoter-tss	vero
peaks_nodup_uniq_vero_infectedAll_rev_peak_16	TSPAN4	13.93	3.73345	2.11967	intron	vero
peaks_nodup_uniq_vero_infectedAll_rev_peak_17	CHID1	27.17	2.34758	1.65051	intron	vero
peaks_nodup_uniq_vero_infectedAll_rev_peak_19	BRSK2	7.66	6.18828	4.15648	tts	vero
peaks_nodup_uniq_vero_infectedAll_rev_peak_20	MOB2	19.51	3.66202	3.38094	intron	vero
peaks_nodup_uniq_vero_infectedAll_rev_peak_21	MOB2	17.42	4.60431	4.57711	intron	vero
peaks_nodup_uniq_vero_infectedAll_rev_peak_22	LOC103236198	22.99	3.42725	3.35657	intron	vero
peaks_nodup_uniq_vero_infectedAll_rev_peak_24a	MOB2	34.14	5.8563	12.529	intron	vero
peaks_nodup_uniq_vero_infectedAll_rev_peak_25	MOB2	22.99	3.99846	4.54808	promoter-tss	vero
peaks_nodup_uniq_vero_infectedAll_rev_peak_27	LOC103241812	13.93	3.73345	2.11967	exon	vero
peaks_nodup_uniq_vero_infectedAll_rev_peak_28a	DUSP8	44.59	3.03921	6.25119	intron	vero
peaks_nodup_uniq_vero_infectedAll_rev_peak_28b	DUSP8	36.23	3.72279	7.28884	intron	vero
peaks_nodup_uniq_vero_infectedAll_rev_peak_30	IFITM10	50.16	1.8272	1.41205	exon	vero
peaks_nodup_uniq_vero_infectedAll_rev_peak_31	LOC103238863	20.9	7.30023	9.52745	intergenic	vero
peaks_nodup_uniq_vero_infectedAll_rev_peak_32	LOC103238863	8.36	4.68014	2.4688	tts	vero
peaks_nodup_uniq_vero_infectedAll_rev_peak_33	TSSC4	22.99	2.66564	1.68794	tts	vero
peaks_nodup_uniq_vero_infectedAll_rev_peak_36	LOC103240971	17.42	3.06954	1.9585	intron	vero
peaks_nodup_uniq_vero_infectedAll_rev_peak_37	LOC103240971	18.81	3.30177	2.41245	intron	vero
peaks_nodup_uniq_vero_infectedAll_rev_peak_38	LOC103240971	26.47	3.92489	5.4825	intron	vero
peaks_nodup_uniq_vero_infectedAll_rev_peak_40	LOC103240971	34.83	2.55961	2.93802	intron	vero
peaks_nodup_uniq_vero_infectedAll_rev_peak_41	LOC103240971	34.83	2.38897	2.3504	intron	vero
peaks_nodup_uniq_vero_infectedAll_rev_peak_44	NAP1L4	17.42	4.60431	4.57711	intron	vero
peaks_nodup_uniq_vero_infectedAll_rev_peak_45	OSBPL5	9.06	4.78903	3.02201	intron	vero
peaks_nodup_uniq_vero_infectedAll_rev_peak_49	LOC103242972	14.63	3.1261	1.48745	exon	vero
peaks_nodup_uniq_vero_infectedAll_rev_peak_51	LOC103243359	15.33	3.26544	1.99445	intergenic	vero
peaks_nodup_uniq_vero_infectedAll_rev_peak_52	LOC103243359	18.81	3.30177	2.41245	promoter-tss	vero
peaks_nodup_uniq_vero_infectedAll_rev_peak_57	LOC103245679	14.63	3.1261	1.48745	promoter-tss	vero
peaks_nodup_uniq_vero_infectedAll_rev_peak_58	LOC103245724	25.08	2.32865	1.41423	tts	vero
peaks_nodup_uniq_vero_infectedAll_rev_peak_59	CCND1	41.1	3.00748	5.77409	promoter-tss	vero
peaks_nodup_uniq_vero_infectedAll_rev_peak_61	LOC103247017	6.27	6.08381	4.82114	intergenic	vero
peaks_nodup_uniq_vero_infectedAll_rev_peak_62	MYEOV	4.18	4.31678	2.25618	intergenic	vero
peaks_nodup_uniq_vero_infectedAll_rev_peak_65a	MYEOV	9.75	4.13602	1.85192	intergenic	vero
peaks_nodup_uniq_vero_infectedAll_rev_peak_65b	MYEOV	22.29	4.65882	6.09112	intergenic	vero
peaks_nodup_uniq_vero_infectedAll_rev_peak_67a	LOC103248293	32.05	3.67197	6.31286	exon	vero
peaks_nodup_uniq_vero_infectedAll_rev_peak_67b	LOC103248293	20.2	4.2408	4.80775	exon	vero
peaks_nodup_uniq_vero_infectedAll_rev_peak_68	PPP6R3	25.78	2.78933	2.42378	intron	vero
peaks_nodup_uniq_vero_infectedAll_rev_peak_71	ALDH3B1	11.15	4.04901	2.41245	promoter-tss	vero
peaks_nodup_uniq_vero_infectedAll_rev_peak_72	UNC93B1	8.36	4.68014	2.4688	exon	vero
peaks_nodup_uniq_vero_infectedAll_rev_peak_74	LOC103216792	44.59	2.84926	5.45717	intergenic	vero
peaks_nodup_uniq_vero_infectedAll_rev_peak_76	LOC103216792	24.38	3.02192	2.98175	intergenic	vero
peaks_nodup_uniq_vero_infectedAll_rev_peak_79	POLD4	16.02	2.83731	1.48745	exon	vero
peaks_nodup_uniq_vero_infectedAll_rev_peak_80	ADRBK1	29.26	2.32777	1.77893	exon	vero
peaks_nodup_uniq_vero_infectedAll_rev_peak_82	KDM2A	28.56	3.28492	4.28242	exon	vero
peaks_nodup_uniq_vero_infectedAll_rev_peak_83	LOC103219180	14.63	3.1261	1.48745	intron	vero
peaks_nodup_uniq_vero_infectedAll_rev_peak_84	RHOD	9.75	4.10445	1.8127	intergenic	vero
peaks_nodup_uniq_vero_infectedAll_rev_peak_85	RHOD	29.96	4.18347	6.68608	exon	vero
peaks_nodup_uniq_vero_infectedAll_rev_peak_86	RHOD	37.62	6.03457	13.876	exon	vero
peaks_nodup_uniq_vero_infectedAll_rev_peak_87	LRFN4	28.56	3.43771	4.6974	exon	vero
peaks_nodup_uniq_vero_infectedAll_rev_peak_90	LOC103220516	27.17	4.69515	7.6187	intron	vero
peaks_nodup_uniq_vero_infectedAll_rev_peak_92	CD248	16.02	2.83731	1.48745	intergenic	vero
peaks_nodup_uniq_vero_infectedAll_rev_peak_96	FOSL1	9.06	5.02849	3.32156	intergenic	vero
peaks_nodup_uniq_vero_infectedAll_rev_peak_97	CCDC85B	43.19	5.8151	15.622	tts	vero
peaks_nodup_uniq_vero_infectedAll_rev_peak_99a	PCNXL3	20.2	2.79	1.91108	exon	vero
peaks_nodup_uniq_vero_infectedAll_rev_peak_99b	PCNXL3	26.47	2.41002	1.64919	exon	vero
peaks_nodup_uniq_vero_infectedAll_rev_peak_102	EHBP1L1	23.69	6.17187	8.99835	exon	vero
peaks_nodup_uniq_vero_infectedAll_rev_peak_103	LTBP3	15.33	3.26544	1.99445	intron	vero
peaks_nodup_uniq_vero_infectedAll_rev_peak_106	DPF2	25.78	3.82536	4.93229	promoter-tss	vero
peaks_nodup_uniq_vero_infectedAll_rev_peak_107	DPF2	37.62	2.75866	4.0832	intergenic	vero
peaks_nodup_uniq_vero_infectedAll_rev_peak_111	SAC3D1	32.05	5.50796	11.0684	tts	vero
peaks_nodup_uniq_vero_infectedAll_rev_peak_113	SLC22A12	49.47	2.4031	4.12239	intron	vero
peaks_nodup_uniq_vero_infectedAll_rev_peak_116	CCDC88B	22.99	2.66564	1.68794	exon	vero
peaks_nodup_uniq_vero_infectedAll_rev_peak_117	CCDC88B	29.96	5.15961	8.96404	exon	vero
peaks_nodup_uniq_vero_infectedAll_rev_peak_118	CCDC88B	9.06	5.02849	3.32156	intron	vero
peaks_nodup_uniq_vero_infectedAll_rev_peak_119	ESRRA	34.83	4.47931	8.81971	promoter-tss	vero
peaks_nodup_uniq_vero_infectedAll_rev_peak_120	FKBP2	22.29	2.91176	2.4125	promoter-tss	vero
peaks_nodup_uniq_vero_infectedAll_rev_peak_122	FLRT1	14.63	3.55238	2.15893	exon	vero
peaks_nodup_uniq_vero_infectedAll_rev_peak_123	FLRT1	25.08	5.21617	8.15179	exon	vero
peaks_nodup_uniq_vero_infectedAll_rev_peak_124	FLRT1	18.81	4.95266	5.2468	exon	vero
peaks_nodup_uniq_vero_infectedAll_rev_peak_125	FLRT1	25.78	6.69438	10.5911	intron	vero
peaks_nodup_uniq_vero_infectedAll_rev_peak_126	RTN3	13.24	3.74661	2.38233	exon	vero
peaks_nodup_uniq_vero_infectedAll_rev_peak_127	RTN3	16.72	3.54411	2.4688	exon	vero
peaks_nodup_uniq_vero_infectedAll_rev_peak_132	LOC103233740	6.97	4.97931	2.12632	promoter-tss	vero
peaks_nodup_uniq_vero_infectedAll_rev_peak_134	LOC103233740	28.56	7.39107	13.1739	intergenic	vero
peaks_nodup_uniq_vero_infectedAll_rev_peak_137	LOC103233793	22.99	7.99692	11.3517	intron	vero
peaks_nodup_uniq_vero_infectedAll_rev_peak_140	TMEM179B	16.02	3.40477	2.4688	promoter-tss	vero
peaks_nodup_uniq_vero_infectedAll_rev_peak_143	EEF1G	8.36	4.68014	2.4688	intron	vero
peaks_nodup_uniq_vero_infectedAll_rev_peak_144	EEF1G	12.54	6.77021	6.07627	promoter-tss	vero
peaks_nodup_uniq_vero_infectedAll_rev_peak_145	LOC103234156	4.18	4.11122	1.81094	intergenic	vero
peaks_nodup_uniq_vero_infectedAll_rev_peak_150	LOC103234231	8.36	4.68014	2.4688	intron	vero
peaks_nodup_uniq_vero_infectedAll_rev_peak_151	FADS1	9.75	5.37683	3.32156	intron	vero
peaks_nodup_uniq_vero_infectedAll_rev_peak_153	LOC103234240	11.84	5.35156	3.77506	intron	vero
peaks_nodup_uniq_vero_infectedAll_rev_peak_158	SYT7	13.93	4.88033	3.6799	exon	vero
peaks_nodup_uniq_vero_infectedAll_rev_peak_159	SYT7	34.83	3.58345	6.22936	exon	vero
peaks_nodup_uniq_vero_infectedAll_rev_peak_160a	SYT7	45.98	2.61009	4.48724	intron	vero
peaks_nodup_uniq_vero_infectedAll_rev_peak_160b	SYT7	29.26	2.32777	1.77893	intron	vero
peaks_nodup_uniq_vero_infectedAll_rev_peak_161	LRRC10B	39.71	2.26174	2.41245	intron	vero
peaks_nodup_uniq_vero_infectedAll_rev_peak_162	LRRC10B	56.43	2.61054	6.05667	exon	vero
peaks_nodup_uniq_vero_infectedAll_rev_peak_163	LRRC10B	55.04	1.86795	1.94738	exon	vero
peaks_nodup_uniq_vero_infectedAll_rev_peak_164	LRRC10B	49.47	2.44976	4.34997	promoter-tss	vero
peaks_nodup_uniq_vero_infectedAll_rev_peak_166	LOC103234415	11.84	5.17892	3.55111	intergenic	vero
peaks_nodup_uniq_vero_infectedAll_rev_peak_169	TMEM132A	16.72	3.4078	2.27268	tts	vero
peaks_nodup_uniq_vero_infectedAll_rev_peak_171b	PTGDR2	21.6	2.97334	2.3252	tts	vero
peaks_nodup_uniq_vero_infectedAll_rev_peak_174	GIF	11.15	4.67194	3.26693	intron	vero
peaks_nodup_uniq_vero_infectedAll_rev_peak_175	STX3	25.08	5.01555	7.7438	intron	vero
peaks_nodup_uniq_vero_infectedAll_rev_peak_176	PATL1	6.27	5.19301	3.06313	intergenic	vero
peaks_nodup_uniq_vero_infectedAll_rev_peak_181a	FAM111A	27.17	7.04273	12.2838	exon	vero
peaks_nodup_uniq_vero_infectedAll_rev_peak_181b	FAM111A	19.51	4.10146	4.1955	exon	vero
peaks_nodup_uniq_vero_infectedAll_rev_peak_181c	FAM111A	18.11	3.53962	3.08466	exon	vero
peaks_nodup_uniq_vero_infectedAll_rev_peak_182	FAM111A	20.9	3.65012	3.43638	exon	vero
peaks_nodup_uniq_vero_infectedAll_rev_peak_183	FAM111A	22.29	2.91176	2.4125	intergenic	vero
peaks_nodup_uniq_vero_infectedAll_rev_peak_184	LOC103235086	4.18	4.24602	2.10817	exon	vero
peaks_nodup_uniq_vero_infectedAll_rev_peak_185	CNTF	20.2	5.301	6.68741	intergenic	vero
peaks_nodup_uniq_vero_infectedAll_rev_peak_187	LOC103235249	44.59	3.79901	9.22947	intergenic	vero
peaks_nodup_uniq_vero_infectedAll_rev_peak_189	ZDHHC5	45.28	2.72264	5.14092	exon	vero
peaks_nodup_uniq_vero_infectedAll_rev_peak_191	YPEL4	32.74	3.74938	6.31286	tts	vero
peaks_nodup_uniq_vero_infectedAll_rev_peak_192	LOC103235358	39.71	4.07113	8.96404	intergenic	vero
peaks_nodup_uniq_vero_infectedAll_rev_peak_193b	RTN4RL2	19.51	2.69833	1.48745	exon	vero
peaks_nodup_uniq_vero_infectedAll_rev_peak_196a	TNKS1BP1	10.45	5.20471	3.53005	exon	vero
peaks_nodup_uniq_vero_infectedAll_rev_peak_197	PTPRJ	10.45	5.20471	3.53005	intron	vero
peaks_nodup_uniq_vero_infectedAll_rev_peak_200a	LOC103236137	20.2	3.42	3.21831	intron	vero
peaks_nodup_uniq_vero_infectedAll_rev_peak_200b	LOC103236137	21.6	2.82467	2.02241	intron	vero
peaks_nodup_uniq_vero_infectedAll_rev_peak_200c	LOC103236137	25.08	3.72584	4.93229	intron	vero
peaks_nodup_uniq_vero_infectedAll_rev_peak_202	MADD	34.83	4.47931	8.81971	promoter-tss	vero
peaks_nodup_uniq_vero_infectedAll_rev_peak_206	C1H11orf49	23.69	3.08593	2.8754	intron	vero
peaks_nodup_uniq_vero_infectedAll_rev_peak_207	C1H11orf49	43.19	8.83896	22.9209	intron	vero
peaks_nodup_uniq_vero_infectedAll_rev_peak_209	ATG13	19.51	5.12683	5.97558	promoter-tss	vero
peaks_nodup_uniq_vero_infectedAll_rev_peak_210	GYLTL1B	6.97	4.97931	2.12632	promoter-tss	vero
peaks_nodup_uniq_vero_infectedAll_rev_peak_214	LOC103236852	11.84	6.42187	5.10709	intron	vero
peaks_nodup_uniq_vero_infectedAll_rev_peak_216	LOC103236993	7.66	5.85378	3.64493	intron	vero
peaks_nodup_uniq_vero_infectedAll_rev_peak_220	LOC103236980	31.35	2.15674	1.39715	exon	vero
peaks_nodup_uniq_vero_infectedAll_rev_peak_222	LOC103237230	10.45	4.03181	2.08526	promoter-tss	vero
peaks_nodup_uniq_vero_infectedAll_rev_peak_224	LOC103237230	22.29	4.65882	6.09112	intron	vero
peaks_nodup_uniq_vero_infectedAll_rev_peak_225	LOC103237208	6.97	4.42606	1.47717	intron	vero
peaks_nodup_uniq_vero_infectedAll_rev_peak_226	LOC103237191	14.63	5.21016	4.54808	intron	vero
peaks_nodup_uniq_vero_infectedAll_rev_peak_237	LOC103237594	12.54	6.15474	5.2468	intron	vero
peaks_nodup_uniq_vero_infectedAll_rev_peak_238	LOC103237594	6.27	4.9796	2.72385	intron	vero
peaks_nodup_uniq_vero_infectedAll_rev_peak_239	LOC103237591	4.88	4.81707	2.10817	promoter-tss	vero
peaks_nodup_uniq_vero_infectedAll_rev_peak_244	FJX1	34.14	2.70291	3.59644	exon	vero
peaks_nodup_uniq_vero_infectedAll_rev_peak_245	FJX1	29.26	2.52175	2.35128	exon	vero
peaks_nodup_uniq_vero_infectedAll_rev_peak_248	LOC103237932	6.97	4.42606	1.47717	promoter-tss	vero
peaks_nodup_uniq_vero_infectedAll_rev_peak_249	LOC103237932	34.14	4.39223	8.81971	intron	vero
peaks_nodup_uniq_vero_infectedAll_rev_peak_251a	LOC103238048	38.32	3.02446	5.2713	exon	vero
peaks_nodup_uniq_vero_infectedAll_rev_peak_251b	LOC103238048	30.65	2.87767	3.44196	exon	vero
peaks_nodup_uniq_vero_infectedAll_rev_peak_252	TCP11L1	8.36	4.68014	2.4688	exon	vero
peaks_nodup_uniq_vero_infectedAll_rev_peak_253	QSER1	43.89	2.99277	5.82963	exon	vero
peaks_nodup_uniq_vero_infectedAll_rev_peak_255	QSER1	27.87	3.20751	3.80568	exon	vero
peaks_nodup_uniq_vero_infectedAll_rev_peak_259	ELP4	5.57	5.47793	3.46282	intron	vero
peaks_nodup_uniq_vero_infectedAll_rev_peak_260	ELP4	7.66	5.41474	3.04391	intron	vero
peaks_nodup_uniq_vero_infectedAll_rev_peak_263	ARL14EP	16.72	5.21193	5.10709	exon	vero
peaks_nodup_uniq_vero_infectedAll_rev_peak_264	ARL14EP	27.17	7.04273	12.2838	exon	vero
peaks_nodup_uniq_vero_infectedAll_rev_peak_265	ARL14EP	6.97	4.97931	2.12632	promoter-tss	vero
peaks_nodup_uniq_vero_infectedAll_rev_peak_266	LOC103242155	4.18	4.17753	1.9585	intergenic	vero
peaks_nodup_uniq_vero_infectedAll_rev_peak_268	LOC103238402	4.18	3.98472	1.56304	intergenic	vero
peaks_nodup_uniq_vero_infectedAll_rev_peak_271	LOC103238402	4.88	4.45215	1.46793	intergenic	vero
peaks_nodup_uniq_vero_infectedAll_rev_peak_272	LOC103238402	7.66	4.3318	1.72073	intergenic	vero
peaks_nodup_uniq_vero_infectedAll_rev_peak_276	LOC103238493	4.88	4.89736	2.25618	intron	vero
peaks_nodup_uniq_vero_infectedAll_rev_peak_278	LOC103238508	4.88	4.91781	2.28299	intergenic	vero
peaks_nodup_uniq_vero_infectedAll_rev_peak_284	LOC103238508	9.06	5.02849	3.32156	intron	vero
peaks_nodup_uniq_vero_infectedAll_rev_peak_285	LOC103238508	18.11	4.77849	5.2468	intron	vero
peaks_nodup_uniq_vero_infectedAll_rev_peak_286	LOC103238508	10.45	3.81678	1.79641	intron	vero
peaks_nodup_uniq_vero_infectedAll_rev_peak_288	CCDC34	5.57	5.47793	3.46282	exon	vero
peaks_nodup_uniq_vero_infectedAll_rev_peak_290	ANO3	5.57	5.38813	3.28047	intron	vero
peaks_nodup_uniq_vero_infectedAll_rev_peak_292	ANO3	13.24	4.7457	3.80568	intron	vero
peaks_nodup_uniq_vero_infectedAll_rev_peak_293	ANO3	6.27	4.54388	2.12632	intron	vero
peaks_nodup_uniq_vero_infectedAll_rev_peak_295	PRMT3	25.78	3.82536	4.93229	exon	vero
peaks_nodup_uniq_vero_infectedAll_rev_peak_296	DBX1	33.44	4.92016	9.8045	exon	vero
peaks_nodup_uniq_vero_infectedAll_rev_peak_298	NAV2	33.44	3.13101	4.77562	exon	vero
peaks_nodup_uniq_vero_infectedAll_rev_peak_301	NAV2	5.57	4.83347	2.26062	intron	vero
peaks_nodup_uniq_vero_infectedAll_rev_peak_303	IGSF22	19.51	4.66076	5.1742	intron	vero
peaks_nodup_uniq_vero_infectedAll_rev_peak_305a	LDHC	16.02	5.31996	5.57358	intron	vero
peaks_nodup_uniq_vero_infectedAll_rev_peak_309	LOC103239434	4.88	4.91781	2.28299	intron	vero
peaks_nodup_uniq_vero_infectedAll_rev_peak_311	OTOG	16.72	5.53768	5.57358	intron	vero
peaks_nodup_uniq_vero_infectedAll_rev_peak_313	KCNJ11	14.63	4.88453	4.09233	intergenic	vero
peaks_nodup_uniq_vero_infectedAll_rev_peak_315	PLEKHA7	4.18	4.31678	2.25618	intergenic	vero
peaks_nodup_uniq_vero_infectedAll_rev_peak_316	LOC103239605	5.57	5.50081	3.51836	exon	vero
peaks_nodup_uniq_vero_infectedAll_rev_peak_317a	SOX6	16.72	5.53768	5.57358	exon	vero
peaks_nodup_uniq_vero_infectedAll_rev_peak_317b	SOX6	11.15	4.04901	2.41245	exon	vero
peaks_nodup_uniq_vero_infectedAll_rev_peak_320	LOC103239831	4.88	4.89736	2.25618	tts	vero
peaks_nodup_uniq_vero_infectedAll_rev_peak_322	FAR1	16.02	5.67462	6.10595	intron	vero
peaks_nodup_uniq_vero_infectedAll_rev_peak_324	ARNTL	4.88	4.66415	1.81094	intron	vero
peaks_nodup_uniq_vero_infectedAll_rev_peak_326	LOC103239975	16.72	6.32877	6.6995	intergenic	vero
peaks_nodup_uniq_vero_infectedAll_rev_peak_327a	LOC103239975	16.72	3.54411	2.4688	intergenic	vero
peaks_nodup_uniq_vero_infectedAll_rev_peak_327b	LOC103239975	16.72	3.54411	2.4688	intergenic	vero
peaks_nodup_uniq_vero_infectedAll_rev_peak_328	LOC103239975	22.99	4.28407	5.10709	intergenic	vero
peaks_nodup_uniq_vero_infectedAll_rev_peak_329	LOC103239975	13.93	4.14828	2.6749	intergenic	vero
peaks_nodup_uniq_vero_infectedAll_rev_peak_331	LOC103239981	12.54	4.51347	3.09663	intergenic	vero
peaks_nodup_uniq_vero_infectedAll_rev_peak_332	LOC103239981	8.36	3.90012	1.55482	intergenic	vero
peaks_nodup_uniq_vero_infectedAll_rev_peak_335	LOC103239981	11.15	4.67194	3.26693	intergenic	vero
peaks_nodup_uniq_vero_infectedAll_rev_peak_337a	LOC103239981	11.15	4.04901	2.41245	intergenic	vero
peaks_nodup_uniq_vero_infectedAll_rev_peak_337b	LOC103239981	8.36	3.90012	1.55482	intergenic	vero
peaks_nodup_uniq_vero_infectedAll_rev_peak_338	LOC103239981	11.15	4.04901	2.41245	intergenic	vero
peaks_nodup_uniq_vero_infectedAll_rev_peak_339	RASSF10	9.75	5.37683	3.32156	intron	vero
peaks_nodup_uniq_vero_infectedAll_rev_peak_341	TEAD1	12.54	3.56327	1.81317	promoter-tss	vero
peaks_nodup_uniq_vero_infectedAll_rev_peak_344	PARVA	27.87	4.12394	6.07627	intron	vero
peaks_nodup_uniq_vero_infectedAll_rev_peak_346	PARVA	4.18	4.33481	2.28299	exon	vero
peaks_nodup_uniq_vero_infectedAll_rev_peak_347	PARVA	4.18	4.33481	2.28299	exon	vero
peaks_nodup_uniq_vero_infectedAll_rev_peak_351a	DKK3	29.26	2.56449	2.46877	exon	vero
peaks_nodup_uniq_vero_infectedAll_rev_peak_351b	DKK3	40.41	2.17937	2.25618	exon	vero
peaks_nodup_uniq_vero_infectedAll_rev_peak_352a	DKK3	61.31	3.17902	9.97117	exon	vero
peaks_nodup_uniq_vero_infectedAll_rev_peak_352b	DKK3	52.95	2.4522	4.58862	exon	vero
peaks_nodup_uniq_vero_infectedAll_rev_peak_353	USP47	22.29	5.82352	8.19476	intron	vero
peaks_nodup_uniq_vero_infectedAll_rev_peak_354a	USP47	9.75	3.84059	1.49348	intron	vero
peaks_nodup_uniq_vero_infectedAll_rev_peak_356	LOC103240213	4.88	4.91781	2.28299	tts	vero
peaks_nodup_uniq_vero_infectedAll_rev_peak_357	LOC103240213	6.27	4.03901	1.47717	intergenic	vero
peaks_nodup_uniq_vero_infectedAll_rev_peak_359	CTR9	48.77	6.22104	18.3771	intron	vero
peaks_nodup_uniq_vero_infectedAll_rev_peak_360	SWAP70	20.9	2.73759	1.59452	intron	vero
peaks_nodup_uniq_vero_infectedAll_rev_peak_363	AKIP1	20.9	4.38014	4.80775	exon	vero
peaks_nodup_uniq_vero_infectedAll_rev_peak_366	EIF3F	16.72	3.22192	1.96923	intergenic	vero
peaks_nodup_uniq_vero_infectedAll_rev_peak_370	OLFML1	14.63	3.90762	2.67335	intron	vero
peaks_nodup_uniq_vero_infectedAll_rev_peak_373	SYT9	13.93	3.73345	2.11967	intron	vero
peaks_nodup_uniq_vero_infectedAll_rev_peak_374	RRP8	18.81	6.60354	7.76925	tts	vero
peaks_nodup_uniq_vero_infectedAll_rev_peak_375	RRP8	11.15	4.04901	2.41245	tts	vero
peaks_nodup_uniq_vero_infectedAll_rev_peak_378	TRIM34	18.11	3.82279	3.59644	intron	vero
peaks_nodup_uniq_vero_infectedAll_rev_peak_380	TRIM6	21.6	2.82467	2.02241	exon	vero
peaks_nodup_uniq_vero_infectedAll_rev_peak_381	STIM1	8.36	4.68014	2.4688	intron	vero
peaks_nodup_uniq_vero_infectedAll_rev_peak_382	STIM1	5.57	4.69537	2.06426	intron	vero
peaks_nodup_uniq_vero_infectedAll_rev_peak_384	STIM1	14.63	4.11329	2.99187	intron	vero
peaks_nodup_uniq_vero_infectedAll_rev_peak_385	STIM1	14.63	3.90762	2.67335	promoter-tss	vero
peaks_nodup_uniq_vero_infectedAll_rev_peak_386	RHOG	6.97	6.63908	4.77562	intron	vero
peaks_nodup_uniq_vero_infectedAll_rev_peak_387	PGAP2	10.45	5.72518	4.1955	intron	vero
peaks_nodup_uniq_vero_infectedAll_rev_peak_388	PGAP2	13.24	3.55928	2.11967	intron	vero
peaks_nodup_uniq_vero_infectedAll_rev_peak_389	LOC103248915	18.81	4.50242	4.53349	intron	vero
peaks_nodup_uniq_vero_infectedAll_rev_peak_393	LOC103247997	38.32	3.9318	8.38572	exon	vero
peaks_nodup_uniq_vero_infectedAll_rev_peak_395	PDE2A	6.27	4.72092	2.35813	intron	vero
peaks_nodup_uniq_vero_infectedAll_rev_peak_396	PDE2A	25.78	4.46292	6.32583	intron	vero
peaks_nodup_uniq_vero_infectedAll_rev_peak_397	ARAP1	34.14	3.19435	5.22886	promoter-tss	vero
peaks_nodup_uniq_vero_infectedAll_rev_peak_398	STARD10	5.57	4.38235	1.60405	intron	vero
peaks_nodup_uniq_vero_infectedAll_rev_peak_399	STARD10	15.33	4.0818	3.29483	intron	vero
peaks_nodup_uniq_vero_infectedAll_rev_peak_401	ATG16L2	4.18	4.33481	2.28299	promoter-tss	vero
peaks_nodup_uniq_vero_infectedAll_rev_peak_402	ATG16L2	15.33	5.5915	5.52227	intron	vero
peaks_nodup_uniq_vero_infectedAll_rev_peak_404	ATG16L2	16.72	2.95343	1.48745	exon	vero
peaks_nodup_uniq_vero_infectedAll_rev_peak_405	ATG16L2	11.84	4.28124	2.41245	intron	vero
peaks_nodup_uniq_vero_infectedAll_rev_peak_411	FCHSD2	4.18	3.92435	1.46793	intron	vero
peaks_nodup_uniq_vero_infectedAll_rev_peak_413	RELT	52.95	4.4957	13.8287	tts	vero
peaks_nodup_uniq_vero_infectedAll_rev_peak_414	RELT	11.15	4.04901	2.41245	intron	vero
peaks_nodup_uniq_vero_infectedAll_rev_peak_416	RELT	6.97	5.77312	3.19373	intron	vero
peaks_nodup_uniq_vero_infectedAll_rev_peak_417	LOC103248016	5.57	5.38813	3.28047	intron	vero
peaks_nodup_uniq_vero_infectedAll_rev_peak_420	LOC103248016	4.18	4.33481	2.28299	intron	vero
peaks_nodup_uniq_vero_infectedAll_rev_peak_421	LOC103248016	4.18	4.04699	1.68794	intron	vero
peaks_nodup_uniq_vero_infectedAll_rev_peak_424	RAB6A	12.54	3.38511	1.55482	intron	vero
peaks_nodup_uniq_vero_infectedAll_rev_peak_425	LOC103248021	47.37	2.19886	2.96346	exon	vero
peaks_nodup_uniq_vero_infectedAll_rev_peak_426	UCP3	18.81	2.83009	1.52598	exon	vero
peaks_nodup_uniq_vero_infectedAll_rev_peak_427	UCP3	21.6	3.2282	2.87503	exon	vero
peaks_nodup_uniq_vero_infectedAll_rev_peak_429	C2CD3	16.02	3.40477	2.4688	exon	vero
peaks_nodup_uniq_vero_infectedAll_rev_peak_430	C2CD3	7.66	4.3318	1.72073	intron	vero
peaks_nodup_uniq_vero_infectedAll_rev_peak_432	C2CD3	4.18	4.11122	1.81094	intron	vero
peaks_nodup_uniq_vero_infectedAll_rev_peak_435	KCNE3	9.06	5.58721	4.06676	exon	vero
peaks_nodup_uniq_vero_infectedAll_rev_peak_436	LOC103248030	25.08	4.34681	6.32583	tts	vero
peaks_nodup_uniq_vero_infectedAll_rev_peak_437	LOC103248030	27.87	2.40563	1.65051	intron	vero
peaks_nodup_uniq_vero_infectedAll_rev_peak_438	LOC103248030	32.05	2.75398	3.5171	exon	vero
peaks_nodup_uniq_vero_infectedAll_rev_peak_442	TPBGL	18.81	2.83009	1.52598	exon	vero
peaks_nodup_uniq_vero_infectedAll_rev_peak_448	PRKRIR	30.65	3.16544	4.28349	exon	vero
peaks_nodup_uniq_vero_infectedAll_rev_peak_449	C1H11orf30	4.88	4.91781	2.28299	exon	vero
peaks_nodup_uniq_vero_infectedAll_rev_peak_452	LOC103248081	13.93	6.78809	6.15709	exon	vero
peaks_nodup_uniq_vero_infectedAll_rev_peak_453a	TSKU	13.93	3.73345	2.11967	intergenic	vero
peaks_nodup_uniq_vero_infectedAll_rev_peak_453b	TSKU	22.99	4.99808	6.44947	intergenic	vero
peaks_nodup_uniq_vero_infectedAll_rev_peak_453c	TSKU	22.99	4.79815	6.09112	intergenic	vero
peaks_nodup_uniq_vero_infectedAll_rev_peak_456	PAK1	11.15	6.07352	5.10709	intron	vero
peaks_nodup_uniq_vero_infectedAll_rev_peak_461a	CLNS1A	34.83	2.18503	1.65292	exon	vero
peaks_nodup_uniq_vero_infectedAll_rev_peak_461b	CLNS1A	50.86	1.99455	2.12517	exon	vero
peaks_nodup_uniq_vero_infectedAll_rev_peak_462	CLNS1A	45.98	1.97401	1.64881	exon	vero
peaks_nodup_uniq_vero_infectedAll_rev_peak_463	CLNS1A	13.24	4.7457	3.80568	intron	vero
peaks_nodup_uniq_vero_infectedAll_rev_peak_465	INTS4	4.18	4.11122	1.81094	intron	vero
peaks_nodup_uniq_vero_infectedAll_rev_peak_466	INTS4	4.88	4.38569	1.35413	intron	vero
peaks_nodup_uniq_vero_infectedAll_rev_peak_467	KCTD14	13.93	3.73345	2.11967	intergenic	vero
peaks_nodup_uniq_vero_infectedAll_rev_peak_468	KCTD21	19.51	3.41789	2.9208	exon	vero
peaks_nodup_uniq_vero_infectedAll_rev_peak_475	LOC103248111	4.88	4.89736	2.25618	exon	vero
peaks_nodup_uniq_vero_infectedAll_rev_peak_479	PRCP	5.57	5.47793	3.46282	intron	vero
peaks_nodup_uniq_vero_infectedAll_rev_peak_480	PRCP	4.18	4.31678	2.25618	intron	vero
peaks_nodup_uniq_vero_infectedAll_rev_peak_482	C1H11orf82	10.45	5.72518	4.1955	promoter-tss	vero
peaks_nodup_uniq_vero_infectedAll_rev_peak_483	LOC103248126	10.45	5.72518	4.1955	exon	vero
peaks_nodup_uniq_vero_infectedAll_rev_peak_484	RAB30	5.57	4.90561	2.37162	intron	vero
peaks_nodup_uniq_vero_infectedAll_rev_peak_485	LOC103248129	11.15	7.5919	7.25802	intergenic	vero
peaks_nodup_uniq_vero_infectedAll_rev_peak_488	LOC103248129	6.27	5.19301	3.06313	intergenic	vero
peaks_nodup_uniq_vero_infectedAll_rev_peak_489	PCF11	4.88	4.91781	2.28299	exon	vero
peaks_nodup_uniq_vero_infectedAll_rev_peak_492	LOC103248132	8.36	6.68592	5.28496	intron	vero
peaks_nodup_uniq_vero_infectedAll_rev_peak_493	CCDC90B	9.75	4.48069	2.25618	intron	vero
peaks_nodup_uniq_vero_infectedAll_rev_peak_496a	CCDC90B	15.33	4.53533	3.97699	intron	vero
peaks_nodup_uniq_vero_infectedAll_rev_peak_497	CCDC90B	11.84	4.28124	2.41245	intron	vero
peaks_nodup_uniq_vero_infectedAll_rev_peak_498	LOC103248152	11.84	4.28124	2.41245	intron	vero
peaks_nodup_uniq_vero_infectedAll_rev_peak_499	LOC103248140	4.18	4.33481	2.28299	intron	vero
peaks_nodup_uniq_vero_infectedAll_rev_peak_502	SYTL2	18.11	2.73056	1.52598	promoter-tss	vero
peaks_nodup_uniq_vero_infectedAll_rev_peak_505	CCDC83	5.57	4.90561	2.37162	intergenic	vero
peaks_nodup_uniq_vero_infectedAll_rev_peak_507	LOC103248162	4.18	4.31678	2.25618	intron	vero
peaks_nodup_uniq_vero_infectedAll_rev_peak_508	LOC103248166	9.06	5.02849	3.32156	intergenic	vero
peaks_nodup_uniq_vero_infectedAll_rev_peak_509	LOC103248166	9.75	8.02512	7.07955	intergenic	vero
peaks_nodup_uniq_vero_infectedAll_rev_peak_510	LOC103248175	10.45	7.06812	6.02521	intergenic	vero
peaks_nodup_uniq_vero_infectedAll_rev_peak_512	LOC103248922	22.99	2.99885	2.4125	tts	vero
peaks_nodup_uniq_vero_infectedAll_rev_peak_513	LOC103248922	18.11	4.77849	5.2468	exon	vero
peaks_nodup_uniq_vero_infectedAll_rev_peak_514	FZD4	25.08	2.37099	1.52598	exon	vero
peaks_nodup_uniq_vero_infectedAll_rev_peak_515	FZD4	19.51	2.92962	1.97494	exon	vero
peaks_nodup_uniq_vero_infectedAll_rev_peak_516	FZD4	24.38	3.17302	3.33429	exon	vero
peaks_nodup_uniq_vero_infectedAll_rev_peak_517	CTSC	45.98	2.34908	3.32156	exon	vero
peaks_nodup_uniq_vero_infectedAll_rev_peak_520	TYR	18.81	3.96213	3.59644	exon	vero
peaks_nodup_uniq_vero_infectedAll_rev_peak_521	TYR	5.57	5.47793	3.46282	intron	vero
peaks_nodup_uniq_vero_infectedAll_rev_peak_525	CHORDC1	5.57	4.69537	2.06426	exon	vero
peaks_nodup_uniq_vero_infectedAll_rev_peak_526	CHORDC1	7.66	6.18828	4.15648	intergenic	vero
peaks_nodup_uniq_vero_infectedAll_rev_peak_527	LOC103248230	4.18	4.33481	2.28299	intergenic	vero
peaks_nodup_uniq_vero_infectedAll_rev_peak_528	LOC103248230	4.18	4.33481	2.28299	intergenic	vero
peaks_nodup_uniq_vero_infectedAll_rev_peak_530	TAF1D	51.56	3.50367	9.56387	exon	vero
peaks_nodup_uniq_vero_infectedAll_rev_peak_533	LOC103248276	8.36	4.68014	2.4688	intergenic	vero
peaks_nodup_uniq_vero_infectedAll_rev_peak_537	MTMR2	7.66	4.3318	1.72073	intron	vero
peaks_nodup_uniq_vero_infectedAll_rev_peak_538	LOC103248283	13.24	3.55928	2.11967	exon	vero
peaks_nodup_uniq_vero_infectedAll_rev_peak_539	LOC103248286	18.81	6.60354	7.76925	exon	vero
peaks_nodup_uniq_vero_infectedAll_rev_peak_543	LOC103248284	6.97	5.17331	2.35813	intron	vero
peaks_nodup_uniq_vero_infectedAll_rev_peak_544	LOC103248284	13.24	7.11856	7.04968	tts	vero
peaks_nodup_uniq_vero_infectedAll_rev_peak_545	LOC103248284	8.36	4.68014	2.4688	intron	vero
peaks_nodup_uniq_vero_infectedAll_rev_peak_546	MAML2	17.42	4.60431	4.57711	exon	vero
peaks_nodup_uniq_vero_infectedAll_rev_peak_547	CCDC82	30.65	6.33087	11.8923	intron	vero
peaks_nodup_uniq_vero_infectedAll_rev_peak_548a	CCDC82	51.56	3.09147	7.68839	exon	vero
peaks_nodup_uniq_vero_infectedAll_rev_peak_548b	CCDC82	45.98	2.47271	3.86918	exon	vero
peaks_nodup_uniq_vero_infectedAll_rev_peak_557	MSANTD4	50.86	3.24115	8.12213	exon	vero
peaks_nodup_uniq_vero_infectedAll_rev_peak_558b	MSANTD4	37.62	2.41383	2.80892	exon	vero
peaks_nodup_uniq_vero_infectedAll_rev_peak_559	KBTBD3	13.93	3.73345	2.11967	exon	vero
peaks_nodup_uniq_vero_infectedAll_rev_peak_561	KBTBD3	7.66	5.41474	3.04391	promoter-tss	vero
peaks_nodup_uniq_vero_infectedAll_rev_peak_562	LOC103248388	18.81	4.71682	4.87071	intron	vero
peaks_nodup_uniq_vero_infectedAll_rev_peak_563	LOC103248388	10.45	4.40398	2.50563	intron	vero
peaks_nodup_uniq_vero_infectedAll_rev_peak_564	LOC103248388	11.84	5.35156	3.77506	intron	vero
peaks_nodup_uniq_vero_infectedAll_rev_peak_565	CWF19L2	35.53	2.60937	3.31651	exon	vero
peaks_nodup_uniq_vero_infectedAll_rev_peak_566	CWF19L2	7.66	4.81311	2.28299	intron	vero
peaks_nodup_uniq_vero_infectedAll_rev_peak_567	CWF19L2	20.9	6.44138	8.22224	exon	vero
peaks_nodup_uniq_vero_infectedAll_rev_peak_571	C1H11orf65	17.42	9.20863	11.2714	intron	vero
peaks_nodup_uniq_vero_infectedAll_rev_peak_573	KDELC2	23.69	4.25646	5.4088	exon	vero
peaks_nodup_uniq_vero_infectedAll_rev_peak_574	KDELC2	25.78	2.67775	2.16897	exon	vero
peaks_nodup_uniq_vero_infectedAll_rev_peak_576c	KDELC2	19.51	2.92962	1.97494	exon	vero
peaks_nodup_uniq_vero_infectedAll_rev_peak_577	EXPH5	9.06	6.61643	5.55339	intron	vero
peaks_nodup_uniq_vero_infectedAll_rev_peak_581	LAYN	8.36	4.68014	2.4688	promoter-tss	vero
peaks_nodup_uniq_vero_infectedAll_rev_peak_584	IL18	11.15	5.06127	3.77506	intron	vero
peaks_nodup_uniq_vero_infectedAll_rev_peak_589	LOC103248522	7.66	5.41474	3.04391	intron	vero
peaks_nodup_uniq_vero_infectedAll_rev_peak_592	APOA4	47.37	3.225	7.62864	exon	vero
peaks_nodup_uniq_vero_infectedAll_rev_peak_602	PCSK7	9.06	5.02849	3.32156	promoter-tss	vero
peaks_nodup_uniq_vero_infectedAll_rev_peak_603	BACE1	19.51	3.41789	2.9208	exon	vero
peaks_nodup_uniq_vero_infectedAll_rev_peak_604	BACE1	7.66	5.41474	3.04391	intron	vero
peaks_nodup_uniq_vero_infectedAll_rev_peak_607	AMICA1	4.18	3.86578	1.35413	intron	vero
peaks_nodup_uniq_vero_infectedAll_rev_peak_608	LOC103248595	11.84	4.22491	2.35613	intergenic	vero
peaks_nodup_uniq_vero_infectedAll_rev_peak_609	PHLDB1	16.72	5.90685	6.10595	exon	vero
peaks_nodup_uniq_vero_infectedAll_rev_peak_610	TREH	6.27	4.78303	2.42935	exon	vero
peaks_nodup_uniq_vero_infectedAll_rev_peak_611	TREH	44.59	2.53268	4.11204	exon	vero
peaks_nodup_uniq_vero_infectedAll_rev_peak_612a	DDX6	29.96	2.38136	1.77893	exon	vero
peaks_nodup_uniq_vero_infectedAll_rev_peak_612b	DDX6	29.96	2.38136	1.77893	exon	vero
peaks_nodup_uniq_vero_infectedAll_rev_peak_618a	LOC103248619	37.62	2.75866	4.0832	tts	vero
peaks_nodup_uniq_vero_infectedAll_rev_peak_619	MFRP	11.84	4.28124	2.41245	exon	vero
peaks_nodup_uniq_vero_infectedAll_rev_peak_623	LOC103248650	5.57	4.69537	2.06426	intron	vero
peaks_nodup_uniq_vero_infectedAll_rev_peak_627	GRAMD1B	47.37	4.39772	12.2538	intron	vero
peaks_nodup_uniq_vero_infectedAll_rev_peak_628	GRAMD1B	52.95	2.99714	7.30119	intron	vero
peaks_nodup_uniq_vero_infectedAll_rev_peak_629	GRAMD1B	34.14	3.37864	5.82332	intron	vero
peaks_nodup_uniq_vero_infectedAll_rev_peak_630	GRAMD1B	32.05	4.72111	9.14567	intron	vero
peaks_nodup_uniq_vero_infectedAll_rev_peak_631	SCN3B	5.57	5.47793	3.46282	intron	vero
peaks_nodup_uniq_vero_infectedAll_rev_peak_633	ZNF202	10.45	3.57823	1.48773	exon	vero
peaks_nodup_uniq_vero_infectedAll_rev_peak_634a	ZNF202	9.06	4.57135	2.72385	exon	vero
peaks_nodup_uniq_vero_infectedAll_rev_peak_634b	ZNF202	9.75	4.88803	2.72385	exon	vero
peaks_nodup_uniq_vero_infectedAll_rev_peak_637	CCDC15	6.27	4.54388	2.12632	promoter-tss	vero
peaks_nodup_uniq_vero_infectedAll_rev_peak_640	STT3A	5.57	4.69537	2.06426	exon	vero
peaks_nodup_uniq_vero_infectedAll_rev_peak_642	LOC103248776	4.18	4.33481	2.28299	tts	vero
peaks_nodup_uniq_vero_infectedAll_rev_peak_647	HYLS1	11.84	9.1741	9.0181	intergenic	vero
peaks_nodup_uniq_vero_infectedAll_rev_peak_649	HYLS1	23.69	4.11458	5.11591	exon	vero
peaks_nodup_uniq_vero_infectedAll_rev_peak_650	HYLS1	16.02	4.25597	3.91024	exon	vero
peaks_nodup_uniq_vero_infectedAll_rev_peak_655	ETS1	43.89	2.80572	5.06387	promoter-tss	vero
peaks_nodup_uniq_vero_infectedAll_rev_peak_659	LOC103248823	16.72	3.54411	2.4688	exon	vero
peaks_nodup_uniq_vero_infectedAll_rev_peak_660	LOC103248823	20.9	4.56265	5.12261	exon	vero
peaks_nodup_uniq_vero_infectedAll_rev_peak_661	LOC103248823	22.99	3.42725	3.35657	exon	vero
peaks_nodup_uniq_vero_infectedAll_rev_peak_665	ARHGAP32	10.45	5.72518	4.1955	intergenic	vero
peaks_nodup_uniq_vero_infectedAll_rev_peak_669	APLP2	18.81	3.53761	2.84878	promoter-tss	vero
peaks_nodup_uniq_vero_infectedAll_rev_peak_670	ST14	6.27	6.08381	4.82114	exon	vero
peaks_nodup_uniq_vero_infectedAll_rev_peak_672	LOC103248833	40.41	3.28635	6.56506	exon	vero
peaks_nodup_uniq_vero_infectedAll_rev_peak_673	ADAMTS8	7.66	4.3318	1.72073	exon	vero
peaks_nodup_uniq_vero_infectedAll_rev_peak_674	C1H11orf44	4.18	4.33481	2.28299	intergenic	vero
peaks_nodup_uniq_vero_infectedAll_rev_peak_675	LOC103248847	13.93	7.4669	7.04968	exon	vero
peaks_nodup_uniq_vero_infectedAll_rev_peak_676	LOC103248847	4.18	4.11122	1.81094	intron	vero
peaks_nodup_uniq_vero_infectedAll_rev_peak_681	IGSF9B	6.27	5.19301	3.06313	intron	vero
peaks_nodup_uniq_vero_infectedAll_rev_peak_682	IGSF9B	14.63	7.81525	8.07374	promoter-tss	vero
peaks_nodup_uniq_vero_infectedAll_rev_peak_683	NCAPD3	11.84	5.35156	3.77506	intron	vero
peaks_nodup_uniq_vero_infectedAll_rev_peak_686	LOC103217005	28.56	3.07961	3.73379	intergenic	vero
peaks_nodup_uniq_vero_infectedAll_rev_peak_688a	LOC103216840	33.44	2.126	1.44853	exon	vero
peaks_nodup_uniq_vero_infectedAll_rev_peak_688b	LOC103216840	50.16	3.19761	8.12213	exon	vero
peaks_nodup_uniq_vero_infectedAll_rev_peak_688c	LOC103216840	40.41	2.588	3.88813	exon	vero
peaks_nodup_uniq_vero_infectedAll_rev_peak_691a	UGGT1	22.29	3.23529	3.16006	exon	vero
peaks_nodup_uniq_vero_infectedAll_rev_peak_691b	UGGT1	29.26	3.0261	3.82294	exon	vero
peaks_nodup_uniq_vero_infectedAll_rev_peak_693b	AMMECR1L	9.75	5.37683	3.32156	promoter-tss	vero
peaks_nodup_uniq_vero_infectedAll_rev_peak_694	AMMECR1L	5.57	5.05655	2.61407	promoter-tss	vero
peaks_nodup_uniq_vero_infectedAll_rev_peak_696	SFT2D3	17.42	3.06954	1.9585	exon	vero
peaks_nodup_uniq_vero_infectedAll_rev_peak_699	BIN1	9.75	5.37683	3.32156	exon	vero
peaks_nodup_uniq_vero_infectedAll_rev_peak_706	LOC103216899	10.45	3.81678	1.79641	intergenic	vero
peaks_nodup_uniq_vero_infectedAll_rev_peak_707	LOC103216899	11.84	9.1741	9.0181	intergenic	vero
peaks_nodup_uniq_vero_infectedAll_rev_peak_710	INHBB	8.36	7.83281	7.63429	intergenic	vero
peaks_nodup_uniq_vero_infectedAll_rev_peak_711	RALB	39.01	3.07805	5.73314	intron	vero
peaks_nodup_uniq_vero_infectedAll_rev_peak_713	LOC103216919	4.18	3.86578	1.35413	intron	vero
peaks_nodup_uniq_vero_infectedAll_rev_peak_714	LOC103216919	13.93	7.4669	7.04968	intron	vero
peaks_nodup_uniq_vero_infectedAll_rev_peak_718	EPB41L5	10.45	3.81678	1.79641	exon	vero
peaks_nodup_uniq_vero_infectedAll_rev_peak_719	PTPN4	8.36	4.1787	1.90055	intron	vero
peaks_nodup_uniq_vero_infectedAll_rev_peak_720	PTPN4	4.18	3.92435	1.46793	intron	vero
peaks_nodup_uniq_vero_infectedAll_rev_peak_721	LOC103216921	5.57	4.69537	2.06426	intron	vero
peaks_nodup_uniq_vero_infectedAll_rev_peak_722	LOC103216921	4.18	4.33481	2.28299	intron	vero
peaks_nodup_uniq_vero_infectedAll_rev_peak_723	LOC103216921	5.57	5.50081	3.51836	intron	vero
peaks_nodup_uniq_vero_infectedAll_rev_peak_724	LOC103216921	4.88	4.59127	1.68794	tts	vero
peaks_nodup_uniq_vero_infectedAll_rev_peak_726	LOC103216922	13.93	4.97793	3.80568	intron	vero
peaks_nodup_uniq_vero_infectedAll_rev_peak_727a	LOC103216922	12.54	4.51347	3.09663	intron	vero
peaks_nodup_uniq_vero_infectedAll_rev_peak_727b	LOC103216922	20.9	7.30023	9.52745	intron	vero
peaks_nodup_uniq_vero_infectedAll_rev_peak_727c	LOC103216922	26.47	9.15808	15.256	intron	vero
peaks_nodup_uniq_vero_infectedAll_rev_peak_729	TMEM177	18.81	2.83009	1.52598	exon	vero
peaks_nodup_uniq_vero_infectedAll_rev_peak_730	SCTR	4.18	4.33481	2.28299	intron	vero
peaks_nodup_uniq_vero_infectedAll_rev_peak_731	TMEM37	52.25	2.92592	7.1489	exon	vero
peaks_nodup_uniq_vero_infectedAll_rev_peak_734	LOC103216966	38.32	2.80843	4.49861	exon	vero
peaks_nodup_uniq_vero_infectedAll_rev_peak_735	LYPD1	32.05	3.67197	6.31286	exon	vero
peaks_nodup_uniq_vero_infectedAll_rev_peak_738	LYPD1	18.11	3.18566	2.41245	intron	vero
peaks_nodup_uniq_vero_infectedAll_rev_peak_739	LYPD1	13.93	4.39229	3.02571	intron	vero
peaks_nodup_uniq_vero_infectedAll_rev_peak_740	LYPD1	78.03	2.25798	6.31286	exon	vero
peaks_nodup_uniq_vero_infectedAll_rev_peak_747a	LYPD1	13.24	3.55928	2.11967	intron	vero
peaks_nodup_uniq_vero_infectedAll_rev_peak_747b	LYPD1	12.54	6.15474	5.2468	intron	vero
peaks_nodup_uniq_vero_infectedAll_rev_peak_748	LYPD1	19.51	3.20427	2.47565	intron	vero
peaks_nodup_uniq_vero_infectedAll_rev_peak_750	NCKAP5	22.29	5.54621	7.72054	intron	vero
peaks_nodup_uniq_vero_infectedAll_rev_peak_755	NCKAP5	6.97	6.42492	4.31085	exon	vero
peaks_nodup_uniq_vero_infectedAll_rev_peak_761	LOC103216986	5.57	4.90561	2.37162	intron	vero
peaks_nodup_uniq_vero_infectedAll_rev_peak_762	LOC103216985	4.88	4.91781	2.28299	intron	vero
peaks_nodup_uniq_vero_infectedAll_rev_peak_763	LOC103216984	6.97	4.97931	2.12632	intron	vero
peaks_nodup_uniq_vero_infectedAll_rev_peak_765	ZRANB3	6.97	4.97931	2.12632	promoter-tss	vero
peaks_nodup_uniq_vero_infectedAll_rev_peak_766	ZRANB3	10.45	6.36131	5.03808	intron	vero
peaks_nodup_uniq_vero_infectedAll_rev_peak_767	LCT	22.29	2.91176	2.4125	intron	vero
peaks_nodup_uniq_vero_infectedAll_rev_peak_768	LOC103216993	18.81	6.60354	7.76925	intron	vero
peaks_nodup_uniq_vero_infectedAll_rev_peak_769a	LOC103216993	13.93	4.97793	3.80568	intron	vero
peaks_nodup_uniq_vero_infectedAll_rev_peak_771	LOC103217029	5.57	5.50081	3.51836	intron	vero
peaks_nodup_uniq_vero_infectedAll_rev_peak_775	GTDC1	4.18	4.24602	2.10817	intron	vero
peaks_nodup_uniq_vero_infectedAll_rev_peak_777	GTDC1	66.19	2.92111	9.34928	exon	vero
peaks_nodup_uniq_vero_infectedAll_rev_peak_778b	LOC103217034	16.72	4.43014	3.91024	intron	vero
peaks_nodup_uniq_vero_infectedAll_rev_peak_780	LOC103218284	4.18	4.33481	2.28299	intergenic	vero
peaks_nodup_uniq_vero_infectedAll_rev_peak_783	ORC4	23.69	4.11458	5.11591	promoter-tss	vero
peaks_nodup_uniq_vero_infectedAll_rev_peak_784	RND3	36.23	3.72279	7.28884	exon	vero
peaks_nodup_uniq_vero_infectedAll_rev_peak_785	RBM43	17.42	3.06954	1.9585	exon	vero
peaks_nodup_uniq_vero_infectedAll_rev_peak_786	RBM43	11.84	4.01367	2.10817	exon	vero
peaks_nodup_uniq_vero_infectedAll_rev_peak_787	RBM43	7.66	4.12552	1.48745	intron	vero
peaks_nodup_uniq_vero_infectedAll_rev_peak_788	NMI	19.51	5.12683	5.97558	intron	vero
peaks_nodup_uniq_vero_infectedAll_rev_peak_790	ARL5A	16.02	4.25597	3.91024	exon	vero
peaks_nodup_uniq_vero_infectedAll_rev_peak_794	LOC103217089	6.97	5.69064	3.06313	intron	vero
peaks_nodup_uniq_vero_infectedAll_rev_peak_795	LOC103217088	4.18	3.98472	1.56304	intron	vero
peaks_nodup_uniq_vero_infectedAll_rev_peak_796	PRPF40A	28.56	2.27418	1.44653	intron	vero
peaks_nodup_uniq_vero_infectedAll_rev_peak_802	LOC103217141	28.56	4.92738	8.26995	exon	vero
peaks_nodup_uniq_vero_infectedAll_rev_peak_803	ACVR1	4.18	4.04699	1.68794	intron	vero
peaks_nodup_uniq_vero_infectedAll_rev_peak_804	UPP2	7.66	4.3318	1.72073	intron	vero
peaks_nodup_uniq_vero_infectedAll_rev_peak_808	CCDC148	4.18	4.31678	2.25618	intron	vero
peaks_nodup_uniq_vero_infectedAll_rev_peak_814	CCDC148	4.18	4.24602	2.10817	intron	vero
peaks_nodup_uniq_vero_infectedAll_rev_peak_817	LOC103217159	10.45	3.81678	1.79641	intron	vero
peaks_nodup_uniq_vero_infectedAll_rev_peak_818	LOC103217159	9.06	4.57135	2.72385	intron	vero
peaks_nodup_uniq_vero_infectedAll_rev_peak_821	BAZ2B	9.06	5.02849	3.32156	intron	vero
peaks_nodup_uniq_vero_infectedAll_rev_peak_827	LOC103218292	4.18	4.24602	2.10817	intergenic	vero
peaks_nodup_uniq_vero_infectedAll_rev_peak_829	LOC103218293	22.99	2.99885	2.4125	intron	vero
peaks_nodup_uniq_vero_infectedAll_rev_peak_831	PLA2R1	26.47	3.92489	5.4825	intron	vero
peaks_nodup_uniq_vero_infectedAll_rev_peak_834	ITGB6	11.15	4.04901	2.41245	intergenic	vero
peaks_nodup_uniq_vero_infectedAll_rev_peak_835	RBMS1	6.27	4.32751	1.84213	intron	vero
peaks_nodup_uniq_vero_infectedAll_rev_peak_837	DPP4	30.65	4.79612	8.54394	intron	vero
peaks_nodup_uniq_vero_infectedAll_rev_peak_838a	DPP4	19.51	3.41789	2.9208	intron	vero
peaks_nodup_uniq_vero_infectedAll_rev_peak_838b	DPP4	17.42	3.2888	2.33751	intron	vero
peaks_nodup_uniq_vero_infectedAll_rev_peak_841a	FIGN	20.2	3.42	3.21831	exon	vero
peaks_nodup_uniq_vero_infectedAll_rev_peak_841b	FIGN	23.69	3.98185	4.83983	exon	vero
peaks_nodup_uniq_vero_infectedAll_rev_peak_841c	FIGN	27.17	3.7067	5.28261	exon	vero
peaks_nodup_uniq_vero_infectedAll_rev_peak_842	GRB14	12.54	6.77021	6.07627	intron	vero
peaks_nodup_uniq_vero_infectedAll_rev_peak_843	GRB14	6.27	5.11987	2.9538	intergenic	vero
peaks_nodup_uniq_vero_infectedAll_rev_peak_845	GRB14	4.18	4.33481	2.28299	intergenic	vero
peaks_nodup_uniq_vero_infectedAll_rev_peak_847	LOC103217211	32.74	2.8597	3.66569	exon	vero
peaks_nodup_uniq_vero_infectedAll_rev_peak_848	LOC103217211	17.42	5.82825	6.46713	intron	vero
peaks_nodup_uniq_vero_infectedAll_rev_peak_851	LOC103217210	12.54	3.38511	1.55482	intron	vero
peaks_nodup_uniq_vero_infectedAll_rev_peak_852	LOC103217224	4.88	4.89736	2.25618	intron	vero
peaks_nodup_uniq_vero_infectedAll_rev_peak_854	LOC103217227	7.66	4.3318	1.72073	intergenic	vero
peaks_nodup_uniq_vero_infectedAll_rev_peak_855	LOC103217227	11.15	4.67194	3.26693	intergenic	vero
peaks_nodup_uniq_vero_infectedAll_rev_peak_856	LOC103217227	9.06	3.86807	1.85192	intergenic	vero
peaks_nodup_uniq_vero_infectedAll_rev_peak_857	LOC103217227	17.42	4.60431	4.57711	intergenic	vero
peaks_nodup_uniq_vero_infectedAll_rev_peak_858	LOC103217228	11.15	4.04901	2.41245	intron	vero
peaks_nodup_uniq_vero_infectedAll_rev_peak_860	LOC103217232	52.25	2.80272	6.531	exon	vero
peaks_nodup_uniq_vero_infectedAll_rev_peak_861	LOC103217232	29.26	3.36233	4.77851	exon	vero
peaks_nodup_uniq_vero_infectedAll_rev_peak_865	SCN9A	16.72	5.90685	6.10595	intron	vero
peaks_nodup_uniq_vero_infectedAll_rev_peak_866	SCN9A	6.27	4.03901	1.47717	intron	vero
peaks_nodup_uniq_vero_infectedAll_rev_peak_869	STK39	11.84	4.28124	2.41245	intron	vero
peaks_nodup_uniq_vero_infectedAll_rev_peak_870	CERS6	4.18	4.31678	2.25618	intergenic	vero
peaks_nodup_uniq_vero_infectedAll_rev_peak_878	LOC103217262	12.54	4.51347	3.09663	intron	vero
peaks_nodup_uniq_vero_infectedAll_rev_peak_879	LRP2	9.75	4.97855	2.84214	intron	vero
peaks_nodup_uniq_vero_infectedAll_rev_peak_880	LRP2	40.41	5.176	12.6828	intron	vero
peaks_nodup_uniq_vero_infectedAll_rev_peak_881	LOC103217270	14.63	3.55238	2.15893	tts	vero
peaks_nodup_uniq_vero_infectedAll_rev_peak_882	LOC103217274	12.54	4.51347	3.09663	promoter-tss	vero
peaks_nodup_uniq_vero_infectedAll_rev_peak_883	LOC103217274	22.29	5.82352	8.19476	intron	vero
peaks_nodup_uniq_vero_infectedAll_rev_peak_884	LOC103217274	18.11	6.37131	7.76925	intron	vero
peaks_nodup_uniq_vero_infectedAll_rev_peak_886	LOC103217274	36.92	12.6415	25.7184	intron	vero
peaks_nodup_uniq_vero_infectedAll_rev_peak_887	CCDC173	13.93	4.39229	3.02571	intron	vero
peaks_nodup_uniq_vero_infectedAll_rev_peak_888	GORASP2	4.18	4.33481	2.28299	intergenic	vero
peaks_nodup_uniq_vero_infectedAll_rev_peak_889	GORASP2	4.18	4.33481	2.28299	intergenic	vero
peaks_nodup_uniq_vero_infectedAll_rev_peak_891	LOC103217302	6.97	4.42606	1.47717	exon	vero
peaks_nodup_uniq_vero_infectedAll_rev_peak_893	LOC103217306	4.18	4.31678	2.25618	intron	vero
peaks_nodup_uniq_vero_infectedAll_rev_peak_894	LOC103217306	10.45	4.40398	2.50563	intergenic	vero
peaks_nodup_uniq_vero_infectedAll_rev_peak_896	LOC103217312	26.47	7.63173	12.7568	intron	vero
peaks_nodup_uniq_vero_infectedAll_rev_peak_898	DLX2	11.15	6.07352	5.10709	exon	vero
peaks_nodup_uniq_vero_infectedAll_rev_peak_899	LOC103217326	25.08	2.37099	1.52598	promoter-tss	vero
peaks_nodup_uniq_vero_infectedAll_rev_peak_901	LOC103217331	4.88	4.89736	2.25618	promoter-tss	vero
peaks_nodup_uniq_vero_infectedAll_rev_peak_902	SP3	41.8	2.11888	2.01617	exon	vero
peaks_nodup_uniq_vero_infectedAll_rev_peak_904	LOC103217343	14.63	3.1261	1.48745	intron	vero
peaks_nodup_uniq_vero_infectedAll_rev_peak_905	OLA1	6.27	4.03901	1.47717	intron	vero
peaks_nodup_uniq_vero_infectedAll_rev_peak_907b	LOC103218301	61.31	1.88814	2.35327	exon	vero
peaks_nodup_uniq_vero_infectedAll_rev_peak_908	CHN1	5.57	4.50241	1.77893	intergenic	vero
peaks_nodup_uniq_vero_infectedAll_rev_peak_909	ATF2	18.11	2.73056	1.52598	intron	vero
peaks_nodup_uniq_vero_infectedAll_rev_peak_910	KIAA1715	12.54	4.51347	3.09663	intron	vero
peaks_nodup_uniq_vero_infectedAll_rev_peak_915	HNRNPA3	34.83	2.10791	1.37816	exon	vero
peaks_nodup_uniq_vero_infectedAll_rev_peak_917	LOC103217396	9.75	4.84399	2.6749	intergenic	vero
peaks_nodup_uniq_vero_infectedAll_rev_peak_919	LOC103217396	12.54	3.22391	1.31858	intergenic	vero
peaks_nodup_uniq_vero_infectedAll_rev_peak_920	LOC103217396	9.75	5.37683	3.32156	intergenic	vero
peaks_nodup_uniq_vero_infectedAll_rev_peak_921	LOC103217396	20.2	3.534	3.43638	intergenic	vero
peaks_nodup_uniq_vero_infectedAll_rev_peak_924	AGPS	7.66	4.3318	1.72073	intergenic	vero
peaks_nodup_uniq_vero_infectedAll_rev_peak_925	LOC103217397	18.81	3.96213	3.59644	exon	vero
peaks_nodup_uniq_vero_infectedAll_rev_peak_926	LOC103217405	16.02	5.67462	6.10595	exon	vero
peaks_nodup_uniq_vero_infectedAll_rev_peak_927	OSBPL6	4.18	4.33481	2.28299	intron	vero
peaks_nodup_uniq_vero_infectedAll_rev_peak_931	LOC103217433	12.54	3.38511	1.55482	intron	vero
peaks_nodup_uniq_vero_infectedAll_rev_peak_932	LOC103217433	28.56	9.85477	17.2597	intron	vero
peaks_nodup_uniq_vero_infectedAll_rev_peak_936	LOC103217434	20.9	5.21445	6.2478	intron	vero
peaks_nodup_uniq_vero_infectedAll_rev_peak_937	LOC103217434	19.51	3.41789	2.9208	intron	vero
peaks_nodup_uniq_vero_infectedAll_rev_peak_938	ZNF385B	22.29	2.58823	1.68794	intron	vero
peaks_nodup_uniq_vero_infectedAll_rev_peak_939a	CWC22	55.74	2.26941	3.98592	exon	vero
peaks_nodup_uniq_vero_infectedAll_rev_peak_939b	CWC22	69.67	2.20841	4.95964	exon	vero
peaks_nodup_uniq_vero_infectedAll_rev_peak_940	CWC22	9.06	5.02849	3.32156	intron	vero
peaks_nodup_uniq_vero_infectedAll_rev_peak_942	NEUROD1	7.66	4.3318	1.72073	exon	vero
peaks_nodup_uniq_vero_infectedAll_rev_peak_943	SSFA2	5.57	4.69537	2.06426	exon	vero
peaks_nodup_uniq_vero_infectedAll_rev_peak_946	PDE1A	4.18	4.33481	2.28299	intron	vero
peaks_nodup_uniq_vero_infectedAll_rev_peak_949	LOC103217460	4.18	4.33481	2.28299	exon	vero
peaks_nodup_uniq_vero_infectedAll_rev_peak_950	LOC103217463	4.88	4.73938	1.9585	exon	vero
peaks_nodup_uniq_vero_infectedAll_rev_peak_951a	DNAJC10	7.66	5.21903	2.78255	intergenic	vero
peaks_nodup_uniq_vero_infectedAll_rev_peak_951b	DNAJC10	6.97	4.79934	1.91345	intergenic	vero
peaks_nodup_uniq_vero_infectedAll_rev_peak_951c	DNAJC10	13.24	4.7457	3.80568	intergenic	vero
peaks_nodup_uniq_vero_infectedAll_rev_peak_954	LOC103217473	11.15	6.07352	5.10709	intergenic	vero
peaks_nodup_uniq_vero_infectedAll_rev_peak_959	LOC103217484	4.18	4.31678	2.25618	intergenic	vero
peaks_nodup_uniq_vero_infectedAll_rev_peak_962	LOC103217485	6.27	4.03901	1.47717	intergenic	vero
peaks_nodup_uniq_vero_infectedAll_rev_peak_967	LOC103217485	17.42	4.60431	4.57711	intergenic	vero
peaks_nodup_uniq_vero_infectedAll_rev_peak_968	LOC103217485	16.02	4.25597	3.91024	promoter-tss	vero
peaks_nodup_uniq_vero_infectedAll_rev_peak_969	LOC103217485	11.15	7.23038	6.71362	intergenic	vero
peaks_nodup_uniq_vero_infectedAll_rev_peak_971	ZC3H15	13.24	4.18739	3.02571	intergenic	vero
peaks_nodup_uniq_vero_infectedAll_rev_peak_975	TFPI	8.36	3.90012	1.55482	intron	vero
peaks_nodup_uniq_vero_infectedAll_rev_peak_976	LOC103217499	4.18	4.33481	2.28299	intron	vero
peaks_nodup_uniq_vero_infectedAll_rev_peak_979a	GULP1	20.9	4.21167	4.50693	promoter-tss	vero
peaks_nodup_uniq_vero_infectedAll_rev_peak_982	COL3A1	4.18	4.33481	2.28299	intron	vero
peaks_nodup_uniq_vero_infectedAll_rev_peak_985	LOC103217503	5.57	5.47793	3.46282	intron	vero
peaks_nodup_uniq_vero_infectedAll_rev_peak_986	LOC103217505	7.66	4.3318	1.72073	intron	vero
peaks_nodup_uniq_vero_infectedAll_rev_peak_987	SLC40A1	6.27	5.19301	3.06313	exon	vero
peaks_nodup_uniq_vero_infectedAll_rev_peak_988	C10H2orf88	15.33	4.0818	3.29483	intron	vero
peaks_nodup_uniq_vero_infectedAll_rev_peak_991	C10H2orf88	13.24	3.55928	2.11967	intron	vero
peaks_nodup_uniq_vero_infectedAll_rev_peak_992	HIBCH	10.45	3.81678	1.79641	intron	vero
peaks_nodup_uniq_vero_infectedAll_rev_peak_994	HIBCH	6.27	4.54388	2.12632	intron	vero
peaks_nodup_uniq_vero_infectedAll_rev_peak_997	TMEM194B	5.57	5.05655	2.61407	intergenic	vero
peaks_nodup_uniq_vero_infectedAll_rev_peak_999	TMEM194B	18.81	4.95266	5.2468	intergenic	vero
peaks_nodup_uniq_vero_infectedAll_rev_peak_1000	LOC103217525	5.57	5.47793	3.46282	tts	vero
peaks_nodup_uniq_vero_infectedAll_rev_peak_1001	GLS	8.36	5.14301	3.0765	intron	vero
peaks_nodup_uniq_vero_infectedAll_rev_peak_1002	LOC103217528	11.15	4.04901	2.41245	intron	vero
peaks_nodup_uniq_vero_infectedAll_rev_peak_1003a	LOC103217528	11.15	3.81982	2.13086	intron	vero
peaks_nodup_uniq_vero_infectedAll_rev_peak_1003b	LOC103217528	14.63	3.90762	2.67335	intron	vero
peaks_nodup_uniq_vero_infectedAll_rev_peak_1004	LOC103217528	12.54	3.38511	1.55482	intron	vero
peaks_nodup_uniq_vero_infectedAll_rev_peak_1011	LOC103217560	12.54	8.46276	8.40956	exon	vero
peaks_nodup_uniq_vero_infectedAll_rev_peak_1013	STK17B	9.06	3.59178	1.49348	exon	vero
peaks_nodup_uniq_vero_infectedAll_rev_peak_1016	SATB2	6.27	4.84681	2.51415	intron	vero
peaks_nodup_uniq_vero_infectedAll_rev_peak_1021	C10H2orf69	14.63	3.90762	2.67335	promoter-tss	vero
peaks_nodup_uniq_vero_infectedAll_rev_peak_1023	LOC103217619	5.57	4.69537	2.06426	intron	vero
peaks_nodup_uniq_vero_infectedAll_rev_peak_1030	LOC103217636	9.75	7.68119	6.48584	intron	vero
peaks_nodup_uniq_vero_infectedAll_rev_peak_1032	ALS2CR12	32.05	2.36055	2.25128	exon	vero
peaks_nodup_uniq_vero_infectedAll_rev_peak_1037	LOC103217651	24.38	3.17302	3.33429	promoter-tss	vero
peaks_nodup_uniq_vero_infectedAll_rev_peak_1038a	ALS2	16.72	2.95343	1.48745	promoter-tss	vero
peaks_nodup_uniq_vero_infectedAll_rev_peak_1039	LOC103217663	11.15	5.06127	3.77506	intron	vero
peaks_nodup_uniq_vero_infectedAll_rev_peak_1040	NOP58	6.27	6.05851	4.77562	intron	vero
peaks_nodup_uniq_vero_infectedAll_rev_peak_1041	BMPR2	5.57	4.56495	1.86209	exon	vero
peaks_nodup_uniq_vero_infectedAll_rev_peak_1042	BMPR2	4.88	4.91781	2.28299	intron	vero
peaks_nodup_uniq_vero_infectedAll_rev_peak_1043	LOC103217669	4.18	4.17753	1.9585	intron	vero
peaks_nodup_uniq_vero_infectedAll_rev_peak_1046	LOC103217684	5.57	5.50081	3.51836	intergenic	vero
peaks_nodup_uniq_vero_infectedAll_rev_peak_1047a	ABI2	25.08	3.72584	4.93229	exon	vero
peaks_nodup_uniq_vero_infectedAll_rev_peak_1048	ABI2	40.41	2.43577	3.29483	exon	vero
peaks_nodup_uniq_vero_infectedAll_rev_peak_1049	NRP2	4.88	4.89736	2.25618	intron	vero
peaks_nodup_uniq_vero_infectedAll_rev_peak_1051	NRP2	6.27	5.67985	3.92223	intron	vero
peaks_nodup_uniq_vero_infectedAll_rev_peak_1053	NRP2	4.88	4.91781	2.28299	intergenic	vero
peaks_nodup_uniq_vero_infectedAll_rev_peak_1056	LOC103217697	6.97	5.69064	3.06313	intergenic	vero
peaks_nodup_uniq_vero_infectedAll_rev_peak_1058	LOC103217697	4.18	3.86578	1.35413	intron	vero
peaks_nodup_uniq_vero_infectedAll_rev_peak_1061	KLF7	45.28	2.57138	4.48724	exon	vero
peaks_nodup_uniq_vero_infectedAll_rev_peak_1062	KLF7	36.92	2.52831	3.04782	exon	vero
peaks_nodup_uniq_vero_infectedAll_rev_peak_1064a	KLF7	8.36	3.90012	1.55482	intron	vero
peaks_nodup_uniq_vero_infectedAll_rev_peak_1064b	KLF7	12.54	4.51347	3.09663	intron	vero
peaks_nodup_uniq_vero_infectedAll_rev_peak_1066	KLF7	11.15	4.04901	2.41245	promoter-tss	vero
peaks_nodup_uniq_vero_infectedAll_rev_peak_1068	LOC103217715	6.97	6.42492	4.31085	intron	vero
peaks_nodup_uniq_vero_infectedAll_rev_peak_1074	FZD5	22.29	2.91176	2.4125	exon	vero
peaks_nodup_uniq_vero_infectedAll_rev_peak_1075	LOC103217723	7.66	4.3318	1.72073	intron	vero
peaks_nodup_uniq_vero_infectedAll_rev_peak_1076a	LOC103217722	20.9	3.12867	2.40412	exon	vero
peaks_nodup_uniq_vero_infectedAll_rev_peak_1077	LOC103217722	4.18	3.86578	1.35413	intron	vero
peaks_nodup_uniq_vero_infectedAll_rev_peak_1078	LOC103217722	22.99	2.99885	2.4125	exon	vero
peaks_nodup_uniq_vero_infectedAll_rev_peak_1082	LOC103217753	40.41	2.76054	4.57431	intron	vero
peaks_nodup_uniq_vero_infectedAll_rev_peak_1083	KANSL1L	60.61	4.10747	14.3806	intron	vero
peaks_nodup_uniq_vero_infectedAll_rev_peak_1084	KANSL1L	51.56	2.1539	3.05327	exon	vero
peaks_nodup_uniq_vero_infectedAll_rev_peak_1085	KANSL1L	52.25	2.09653	2.90422	exon	vero
peaks_nodup_uniq_vero_infectedAll_rev_peak_1086	KANSL1L	27.17	4.02442	6.07627	promoter-tss	vero
peaks_nodup_uniq_vero_infectedAll_rev_peak_1091b	IKZF2	7.66	4.3318	1.72073	exon	vero
peaks_nodup_uniq_vero_infectedAll_rev_peak_1092	BARD1	9.06	5.02849	3.32156	intron	vero
peaks_nodup_uniq_vero_infectedAll_rev_peak_1094a	LOC103217805	24.38	3.62631	4.3924	intergenic	vero
peaks_nodup_uniq_vero_infectedAll_rev_peak_1094b	LOC103217805	25.78	3.34719	3.81252	intergenic	vero
peaks_nodup_uniq_vero_infectedAll_rev_peak_1095	LOC103217805	36.23	3.10232	5.24317	intergenic	vero
peaks_nodup_uniq_vero_infectedAll_rev_peak_1096	LOC103217805	7.66	4.3318	1.72073	intergenic	vero
peaks_nodup_uniq_vero_infectedAll_rev_peak_1097	LOC103217805	10.45	6.36131	5.03808	intergenic	vero
peaks_nodup_uniq_vero_infectedAll_rev_peak_1098a	LOC103217805	8.36	4.68014	2.4688	intergenic	vero
peaks_nodup_uniq_vero_infectedAll_rev_peak_1098b	LOC103217805	7.66	4.3318	1.72073	intergenic	vero
peaks_nodup_uniq_vero_infectedAll_rev_peak_1100	LOC103217804	4.88	4.66415	1.81094	intergenic	vero
peaks_nodup_uniq_vero_infectedAll_rev_peak_1103	MREG	5.57	5.50081	3.51836	intron	vero
peaks_nodup_uniq_vero_infectedAll_rev_peak_1104	MREG	10.45	9.58181	10.6233	intron	vero
peaks_nodup_uniq_vero_infectedAll_rev_peak_1106a	LOC103217845	22.99	3.42725	3.35657	intergenic	vero
peaks_nodup_uniq_vero_infectedAll_rev_peak_1106b	LOC103217845	20.2	6.62625	8.85712	intergenic	vero
peaks_nodup_uniq_vero_infectedAll_rev_peak_1108	LOC103217847	24.38	3.17302	3.33429	tts	vero
peaks_nodup_uniq_vero_infectedAll_rev_peak_1109	LOC103217846	8.36	5.85018	4.01918	intron	vero
peaks_nodup_uniq_vero_infectedAll_rev_peak_1114	VIL1	4.88	4.91781	2.28299	intron	vero
peaks_nodup_uniq_vero_infectedAll_rev_peak_1115	VIL1	9.06	6.36517	5.17217	intron	vero
peaks_nodup_uniq_vero_infectedAll_rev_peak_1116	LOC103217869	6.27	4.6014	2.21393	intron	vero
peaks_nodup_uniq_vero_infectedAll_rev_peak_1118	ZNF142	15.33	6.80299	7.23411	tts	vero
peaks_nodup_uniq_vero_infectedAll_rev_peak_1119	ZNF142	13.24	3.55928	2.11967	exon	vero
peaks_nodup_uniq_vero_infectedAll_rev_peak_1120	LOC103217892	48.77	4.14736	11.4451	exon	vero
peaks_nodup_uniq_vero_infectedAll_rev_peak_1125	CHPF	41.8	1.98155	1.43788	exon	vero
peaks_nodup_uniq_vero_infectedAll_rev_peak_1127	OBSL1	15.33	2.91557	1.38727	promoter-tss	vero
peaks_nodup_uniq_vero_infectedAll_rev_peak_1130	EPHA4	5.57	4.69537	2.06426	exon	vero
peaks_nodup_uniq_vero_infectedAll_rev_peak_1131	EPHA4	6.27	6.08381	4.82114	exon	vero
peaks_nodup_uniq_vero_infectedAll_rev_peak_1132	EPHA4	15.33	3.26544	1.99445	exon	vero
peaks_nodup_uniq_vero_infectedAll_rev_peak_1139	CUL3	14.63	3.1261	1.48745	intron	vero
peaks_nodup_uniq_vero_infectedAll_rev_peak_1141	LOC103217972	21.6	4.51948	5.42236	intron	vero
peaks_nodup_uniq_vero_infectedAll_rev_peak_1142	LOC103217972	11.84	4.28124	2.41245	intron	vero
peaks_nodup_uniq_vero_infectedAll_rev_peak_1143a	DOCK10	14.63	3.72155	2.40412	intron	vero
peaks_nodup_uniq_vero_infectedAll_rev_peak_1143b	DOCK10	16.72	3.54411	2.4688	intron	vero
peaks_nodup_uniq_vero_infectedAll_rev_peak_1144a	DOCK10	22.29	5.06393	6.85087	intron	vero
peaks_nodup_uniq_vero_infectedAll_rev_peak_1144b	DOCK10	17.42	4.38506	4.21928	intron	vero
peaks_nodup_uniq_vero_infectedAll_rev_peak_1145	DOCK10	20.2	5.301	6.68741	intron	vero
peaks_nodup_uniq_vero_infectedAll_rev_peak_1146	DOCK10	29.26	3.36233	4.77851	exon	vero
peaks_nodup_uniq_vero_infectedAll_rev_peak_1148a	IRS1	20.2	3.534	3.43638	exon	vero
peaks_nodup_uniq_vero_infectedAll_rev_peak_1149	IRS1	27.87	3.60845	4.82114	exon	vero
peaks_nodup_uniq_vero_infectedAll_rev_peak_1152	LOC103217983	18.11	3.66167	3.32156	promoter-tss	vero
peaks_nodup_uniq_vero_infectedAll_rev_peak_1153	COL4A4	4.18	4.33481	2.28299	intron	vero
peaks_nodup_uniq_vero_infectedAll_rev_peak_1159	LOC103218008	4.88	4.89736	2.25618	intron	vero
peaks_nodup_uniq_vero_infectedAll_rev_peak_1163	LOC103218330	11.15	6.07352	5.10709	intron	vero
peaks_nodup_uniq_vero_infectedAll_rev_peak_1164	LOC103218330	5.57	4.76342	2.15938	intron	vero
peaks_nodup_uniq_vero_infectedAll_rev_peak_1166	LOC103218330	6.27	5.67985	3.92223	intron	vero
peaks_nodup_uniq_vero_infectedAll_rev_peak_1167	LOC103218330	6.97	6.42492	4.31085	intron	vero
peaks_nodup_uniq_vero_infectedAll_rev_peak_1173	PDE6D	33.44	4.92016	9.8045	intron	vero
peaks_nodup_uniq_vero_infectedAll_rev_peak_1178	KCNJ13	7.66	4.3318	1.72073	intron	vero
peaks_nodup_uniq_vero_infectedAll_rev_peak_1179	C10H2orf82	4.88	4.73938	1.9585	intron	vero
peaks_nodup_uniq_vero_infectedAll_rev_peak_1183	DGKD	20.2	3.02914	2.40412	exon	vero
peaks_nodup_uniq_vero_infectedAll_rev_peak_1186	ARL4C	62.01	2.1726	4.23502	exon	vero
peaks_nodup_uniq_vero_infectedAll_rev_peak_1187	ARL4C	47.37	3.02343	6.74934	promoter-tss	vero
peaks_nodup_uniq_vero_infectedAll_rev_peak_1188	ARL4C	4.88	4.91781	2.28299	intergenic	vero
peaks_nodup_uniq_vero_infectedAll_rev_peak_1190	LOC103218336	5.57	4.2138	1.38309	exon	vero
peaks_nodup_uniq_vero_infectedAll_rev_peak_1191	LOC103218139	19.51	5.12683	5.97558	intron	vero
peaks_nodup_uniq_vero_infectedAll_rev_peak_1193	LOC103218139	9.75	5.37683	3.32156	intron	vero
peaks_nodup_uniq_vero_infectedAll_rev_peak_1196	SCLY	32.74	5.62407	11.0684	intergenic	vero
peaks_nodup_uniq_vero_infectedAll_rev_peak_1198	SCLY	31.35	3.23511	4.77156	promoter-tss	vero
peaks_nodup_uniq_vero_infectedAll_rev_peak_1199	KLHL30	6.97	5.69064	3.06313	intron	vero
peaks_nodup_uniq_vero_infectedAll_rev_peak_1200	LOC103218178	11.15	9.06496	9.72391	intergenic	vero
peaks_nodup_uniq_vero_infectedAll_rev_peak_1201	LOC103218178	9.06	7.61892	7.29873	intergenic	vero
peaks_nodup_uniq_vero_infectedAll_rev_peak_1204	TRAF3IP1	4.88	4.89736	2.25618	exon	vero
peaks_nodup_uniq_vero_infectedAll_rev_peak_1205a	LOC103218194	22.99	4.79815	6.09112	exon	vero
peaks_nodup_uniq_vero_infectedAll_rev_peak_1205b	LOC103218194	16.72	3.54411	2.4688	exon	vero
peaks_nodup_uniq_vero_infectedAll_rev_peak_1206	LOC103218194	20.9	4.38014	4.80775	intron	vero
peaks_nodup_uniq_vero_infectedAll_rev_peak_1208	NDUFA10	7.66	4.3318	1.72073	intron	vero
peaks_nodup_uniq_vero_infectedAll_rev_peak_1215	AGXT	4.18	4.31678	2.25618	intergenic	vero
peaks_nodup_uniq_vero_infectedAll_rev_peak_1217	MTERFD2	51.56	4.37959	13.227	exon	vero
peaks_nodup_uniq_vero_infectedAll_rev_peak_1220	PPP1R7	9.06	7.18355	6.48584	promoter-tss	vero
peaks_nodup_uniq_vero_infectedAll_rev_peak_1222	ATG4B	28.56	2.46369	2.00941	exon	vero
peaks_nodup_uniq_vero_infectedAll_rev_peak_1224	D2HGDH	34.14	2.92815	4.3594	intergenic	vero
peaks_nodup_uniq_vero_infectedAll_rev_peak_1225	NEU4	6.97	6.66681	4.82114	intergenic	vero
peaks_nodup_uniq_vero_infectedAll_rev_peak_1228	WASH1	19.51	4.66076	5.1742	intron	vero
peaks_nodup_uniq_vero_infectedAll_rev_peak_1230	SLC6A12	6.97	5.10699	2.28216	promoter-tss	vero
peaks_nodup_uniq_vero_infectedAll_rev_peak_1234	SLC6A13	66.19	1.67964	1.34926	exon	vero
peaks_nodup_uniq_vero_infectedAll_rev_peak_1238	RAD52	20.2	7.068	9.52745	intron	vero
peaks_nodup_uniq_vero_infectedAll_rev_peak_1239	WNT5B	25.08	5.21617	8.15179	intron	vero
peaks_nodup_uniq_vero_infectedAll_rev_peak_1240	FBXL14	7.66	5.77573	3.53005	intron	vero
peaks_nodup_uniq_vero_infectedAll_rev_peak_1241	FBXL14	32.05	4.13097	7.61394	exon	vero
peaks_nodup_uniq_vero_infectedAll_rev_peak_1242a	FBXL14	38.32	4.36866	9.7487	promoter-tss	vero
peaks_nodup_uniq_vero_infectedAll_rev_peak_1243	LOC103218373	7.66	4.3318	1.72073	exon	vero
peaks_nodup_uniq_vero_infectedAll_rev_peak_1244	LRTM2	20.9	3.12867	2.40412	exon	vero
peaks_nodup_uniq_vero_infectedAll_rev_peak_1245	CACNA2D4	6.27	6.05851	4.77562	intergenic	vero
peaks_nodup_uniq_vero_infectedAll_rev_peak_1246	LOC103218855	18.81	3.96213	3.59644	intron	vero
peaks_nodup_uniq_vero_infectedAll_rev_peak_1247	DCP1B	11.84	4.28124	2.41245	intron	vero
peaks_nodup_uniq_vero_infectedAll_rev_peak_1252	FKBP4	5.57	4.50241	1.77893	intergenic	vero
peaks_nodup_uniq_vero_infectedAll_rev_peak_1255a	TEAD4	11.84	6.42187	5.10709	promoter-tss	vero
peaks_nodup_uniq_vero_infectedAll_rev_peak_1256	EFCAB4B	4.18	4.33481	2.28299	intron	vero
peaks_nodup_uniq_vero_infectedAll_rev_peak_1257	EFCAB4B	4.88	4.38569	1.35413	intergenic	vero
peaks_nodup_uniq_vero_infectedAll_rev_peak_1262	LOC103218422	4.18	4.33481	2.28299	intron	vero
peaks_nodup_uniq_vero_infectedAll_rev_peak_1263	TNFRSF1A	21.6	3.2282	2.87503	intron	vero
peaks_nodup_uniq_vero_infectedAll_rev_peak_1264	SCNN1A	4.18	4.31678	2.25618	exon	vero
peaks_nodup_uniq_vero_infectedAll_rev_peak_1266	SCNN1A	9.75	7.68119	6.48584	exon	vero
peaks_nodup_uniq_vero_infectedAll_rev_peak_1267	GAPDH	14.63	3.90762	2.67335	intron	vero
peaks_nodup_uniq_vero_infectedAll_rev_peak_1268	NOP2	28.56	2.46369	2.00941	intron	vero
peaks_nodup_uniq_vero_infectedAll_rev_peak_1269	LOC103218458	17.42	3.38552	2.48671	intron	vero
peaks_nodup_uniq_vero_infectedAll_rev_peak_1271	CHD4	20.2	3.534	3.43638	intergenic	vero
peaks_nodup_uniq_vero_infectedAll_rev_peak_1273	ACRBP	4.18	4.31678	2.25618	exon	vero
peaks_nodup_uniq_vero_infectedAll_rev_peak_1274	ING4	16.02	5.67462	6.10595	intron	vero
peaks_nodup_uniq_vero_infectedAll_rev_peak_1275	COPS7A	7.66	6.18828	4.15648	intergenic	vero
peaks_nodup_uniq_vero_infectedAll_rev_peak_1276	COPS7A	4.18	4.33481	2.28299	intergenic	vero
peaks_nodup_uniq_vero_infectedAll_rev_peak_1277	PTMS	23.69	3.52678	3.86704	intron	vero
peaks_nodup_uniq_vero_infectedAll_rev_peak_1279	SPSB2	25.78	5.8212	9.0399	tts	vero
peaks_nodup_uniq_vero_infectedAll_rev_peak_1281	ATN1	6.27	4.6014	2.21393	promoter-tss	vero
peaks_nodup_uniq_vero_infectedAll_rev_peak_1283	C1R	18.11	3.27294	2.56804	intron	vero
peaks_nodup_uniq_vero_infectedAll_rev_peak_1284	LOC103218859	34.83	2.98621	4.3594	promoter-tss	vero
peaks_nodup_uniq_vero_infectedAll_rev_peak_1285	LOC103218859	19.51	5.79303	7.04968	intron	vero
peaks_nodup_uniq_vero_infectedAll_rev_peak_1287	RBP5	9.75	4.13602	1.85192	promoter-tss	vero
peaks_nodup_uniq_vero_infectedAll_rev_peak_1288	CD163	11.84	6.42187	5.10709	exon	vero
peaks_nodup_uniq_vero_infectedAll_rev_peak_1289a	CD163	9.75	6.72104	5.06297	intergenic	vero
peaks_nodup_uniq_vero_infectedAll_rev_peak_1289b	CD163	6.97	5.24138	2.42935	intergenic	vero
peaks_nodup_uniq_vero_infectedAll_rev_peak_1300	LOC103218550	4.18	4.24602	2.10817	intron	vero
peaks_nodup_uniq_vero_infectedAll_rev_peak_1303	YBX3	73.15	4.11958	17.8591	promoter-tss	vero
peaks_nodup_uniq_vero_infectedAll_rev_peak_1309	LOC103218621	13.24	7.90951	8.15179	exon	vero
peaks_nodup_uniq_vero_infectedAll_rev_peak_1311	BCL2L14	26.47	3.43428	4.31234	exon	vero
peaks_nodup_uniq_vero_infectedAll_rev_peak_1314	LOC103218638	8.36	4.25467	1.99445	intron	vero
peaks_nodup_uniq_vero_infectedAll_rev_peak_1315	LOC103218638	21.6	3.2282	2.87503	intron	vero
peaks_nodup_uniq_vero_infectedAll_rev_peak_1317	LOC103218638	4.18	4.17753	1.9585	intron	vero
peaks_nodup_uniq_vero_infectedAll_rev_peak_1319	LOH12CR1	11.15	6.07352	5.10709	promoter-tss	vero
peaks_nodup_uniq_vero_infectedAll_rev_peak_1320	DUSP16	44.59	3.50678	8.13916	exon	vero
peaks_nodup_uniq_vero_infectedAll_rev_peak_1321	DUSP16	33.44	2.91874	4.08826	exon	vero
peaks_nodup_uniq_vero_infectedAll_rev_peak_1323	DUSP16	9.06	5.58721	4.06676	intron	vero
peaks_nodup_uniq_vero_infectedAll_rev_peak_1324	CREBL2	7.66	7.21966	6.12298	promoter-tss	vero
peaks_nodup_uniq_vero_infectedAll_rev_peak_1325	GPRC5D	5.57	5.47793	3.46282	promoter-tss	vero
peaks_nodup_uniq_vero_infectedAll_rev_peak_1326	RERG	8.36	4.68014	2.4688	exon	vero
peaks_nodup_uniq_vero_infectedAll_rev_peak_1329	LOC103218689	29.26	3.28924	4.57387	intergenic	vero
peaks_nodup_uniq_vero_infectedAll_rev_peak_1330	EPS8	25.08	2.55695	2.04272	intron	vero
peaks_nodup_uniq_vero_infectedAll_rev_peak_1331	EPS8	9.06	5.91587	4.53423	intron	vero
peaks_nodup_uniq_vero_infectedAll_rev_peak_1332	LOC103218695	7.66	4.3318	1.72073	intron	vero
peaks_nodup_uniq_vero_infectedAll_rev_peak_1335	LOC103218708	17.42	6.13908	6.93709	intergenic	vero
peaks_nodup_uniq_vero_infectedAll_rev_peak_1339b	PLEKHA5	6.97	4.42606	1.47717	exon	vero
peaks_nodup_uniq_vero_infectedAll_rev_peak_1345	ABCC9	9.75	5.37683	3.32156	intron	vero
peaks_nodup_uniq_vero_infectedAll_rev_peak_1346a	C2CD5	20.9	4.38014	4.80775	intron	vero
peaks_nodup_uniq_vero_infectedAll_rev_peak_1346b	C2CD5	27.17	4.69515	7.6187	intron	vero
peaks_nodup_uniq_vero_infectedAll_rev_peak_1347	LRMP	6.27	4.84681	2.51415	tts	vero
peaks_nodup_uniq_vero_infectedAll_rev_peak_1349	LOC103218759	4.88	4.89736	2.25618	intron	vero
peaks_nodup_uniq_vero_infectedAll_rev_peak_1350	LOC103218759	9.06	3.59178	1.49348	intron	vero
peaks_nodup_uniq_vero_infectedAll_rev_peak_1354	RASSF8	10.45	3.81678	1.79641	promoter-tss	vero
peaks_nodup_uniq_vero_infectedAll_rev_peak_1355	SSPN	15.33	5.44239	5.2993	exon	vero
peaks_nodup_uniq_vero_infectedAll_rev_peak_1356	LOC103218775	16.02	9.45771	11.5345	exon	vero
peaks_nodup_uniq_vero_infectedAll_rev_peak_1358	LOC103218775	4.18	4.33481	2.28299	intron	vero
peaks_nodup_uniq_vero_infectedAll_rev_peak_1359	LOC103218775	4.88	4.59127	1.68794	intron	vero
peaks_nodup_uniq_vero_infectedAll_rev_peak_1361	ITPR2	7.66	4.3318	1.72073	intron	vero
peaks_nodup_uniq_vero_infectedAll_rev_peak_1362	ITPR2	4.18	3.98472	1.56304	intron	vero
peaks_nodup_uniq_vero_infectedAll_rev_peak_1363	ITPR2	7.66	4.3318	1.72073	intron	vero
peaks_nodup_uniq_vero_infectedAll_rev_peak_1364	TM7SF3	14.63	3.1261	1.48745	intron	vero
peaks_nodup_uniq_vero_infectedAll_rev_peak_1367	IPO8	35.53	2.60937	3.31651	exon	vero
peaks_nodup_uniq_vero_infectedAll_rev_peak_1368	CAPRIN2	32.05	3.30477	5.23381	exon	vero
peaks_nodup_uniq_vero_infectedAll_rev_peak_1370	LOC103218823	39.01	2.50092	3.51836	exon	vero
peaks_nodup_uniq_vero_infectedAll_rev_peak_1371	LOC103218823	9.06	4.57135	2.72385	intron	vero
peaks_nodup_uniq_vero_infectedAll_rev_peak_1372	LOC103218823	23.69	2.74305	2.0968	exon	vero
peaks_nodup_uniq_vero_infectedAll_rev_peak_1374	DENND5B	9.75	4.75826	2.56256	intron	vero
peaks_nodup_uniq_vero_infectedAll_rev_peak_1377	LOC103218839	20.9	3.53237	3.21831	exon	vero
peaks_nodup_uniq_vero_infectedAll_rev_peak_1378	LOC103218839	34.83	3.58345	6.22936	intron	vero
peaks_nodup_uniq_vero_infectedAll_rev_peak_1379a	SYT10	35.53	2.81009	3.99849	exon	vero
peaks_nodup_uniq_vero_infectedAll_rev_peak_1380	SYT10	16.02	4.25597	3.91024	intron	vero
peaks_nodup_uniq_vero_infectedAll_rev_peak_1383	CPNE8	5.57	4.69537	2.06426	intergenic	vero
peaks_nodup_uniq_vero_infectedAll_rev_peak_1392	LOC103239478	34.83	5.77976	12.0833	exon	vero
peaks_nodup_uniq_vero_infectedAll_rev_peak_1393	GXYLT1	7.66	4.3318	1.72073	intron	vero
peaks_nodup_uniq_vero_infectedAll_rev_peak_1395	YAF2	6.97	4.97931	2.12632	intron	vero
peaks_nodup_uniq_vero_infectedAll_rev_peak_1396	YAF2	22.99	3.63497	3.80568	intron	vero
peaks_nodup_uniq_vero_infectedAll_rev_peak_1398a	LOC103238170	9.06	4.1904	2.25618	exon	vero
peaks_nodup_uniq_vero_infectedAll_rev_peak_1398b	LOC103238170	9.75	3.84059	1.49348	exon	vero
peaks_nodup_uniq_vero_infectedAll_rev_peak_1401	PUS7L	15.33	5.44239	5.2993	exon	vero
peaks_nodup_uniq_vero_infectedAll_rev_peak_1402	SCAF11	43.19	2.02728	1.90013	exon	vero
peaks_nodup_uniq_vero_infectedAll_rev_peak_1404b	SLC38A1	18.11	4.63931	5.0331	intron	vero
peaks_nodup_uniq_vero_infectedAll_rev_peak_1405	SLC38A1	17.42	3.06954	1.9585	intron	vero
peaks_nodup_uniq_vero_infectedAll_rev_peak_1406	SLC38A1	16.02	3.40477	2.4688	intron	vero
peaks_nodup_uniq_vero_infectedAll_rev_peak_1407	SLC38A1	25.08	3.26011	3.81252	exon	vero
peaks_nodup_uniq_vero_infectedAll_rev_peak_1414	ASB8	22.99	3.42725	3.35657	exon	vero
peaks_nodup_uniq_vero_infectedAll_rev_peak_1416	ZNF641	13.24	3.55928	2.11967	intron	vero
peaks_nodup_uniq_vero_infectedAll_rev_peak_1417	LOC103238239	25.78	2.43432	1.52598	intergenic	vero
peaks_nodup_uniq_vero_infectedAll_rev_peak_1418	KANSL2	32.05	2.70883	3.36656	exon	vero
peaks_nodup_uniq_vero_infectedAll_rev_peak_1419	KANSL2	33.44	2.82304	3.78501	exon	vero
peaks_nodup_uniq_vero_infectedAll_rev_peak_1421	CACNB3	41.1	2.96512	5.60206	exon	vero
peaks_nodup_uniq_vero_infectedAll_rev_peak_1422	PRKAG1	34.14	2.70291	3.59644	exon	vero
peaks_nodup_uniq_vero_infectedAll_rev_peak_1424	PRKAG1	45.98	2.23722	2.81655	exon	vero
peaks_nodup_uniq_vero_infectedAll_rev_peak_1425	TROAP	6.27	6.08381	4.82114	exon	vero
peaks_nodup_uniq_vero_infectedAll_rev_peak_1427	PRPF40B	32.74	4.82063	9.14567	intron	vero
peaks_nodup_uniq_vero_infectedAll_rev_peak_1429	NCKAP5L	20.2	6.66793	8.926	intergenic	vero
peaks_nodup_uniq_vero_infectedAll_rev_peak_1430	NCKAP5L	29.26	5.21741	9.34225	exon	vero
peaks_nodup_uniq_vero_infectedAll_rev_peak_1431	NCKAP5L	39.01	2.85819	4.90259	exon	vero
peaks_nodup_uniq_vero_infectedAll_rev_peak_1437	LIMA1	11.15	4.04901	2.41245	intron	vero
peaks_nodup_uniq_vero_infectedAll_rev_peak_1442	CSRNP2	13.24	3.55928	2.11967	exon	vero
peaks_nodup_uniq_vero_infectedAll_rev_peak_1443	CSRNP2	36.92	3.79246	7.28884	intron	vero
peaks_nodup_uniq_vero_infectedAll_rev_peak_1444	TFCP2	27.87	4.12394	6.07627	exon	vero
peaks_nodup_uniq_vero_infectedAll_rev_peak_1445	FIGNL2	5.57	4.50241	1.77893	exon	vero
peaks_nodup_uniq_vero_infectedAll_rev_peak_1447	TENC1	14.63	5.21016	4.54808	promoter-tss	vero
peaks_nodup_uniq_vero_infectedAll_rev_peak_1451	C11H12orf10	4.88	4.89736	2.25618	intron	vero
peaks_nodup_uniq_vero_infectedAll_rev_peak_1453	AAAS	44.59	2.68166	4.77274	intron	vero
peaks_nodup_uniq_vero_infectedAll_rev_peak_1455	ATF7	12.54	3.38511	1.55482	intron	vero
peaks_nodup_uniq_vero_infectedAll_rev_peak_1458	HOXC9	14.63	3.90762	2.67335	intergenic	vero
peaks_nodup_uniq_vero_infectedAll_rev_peak_1459	HOXC9	14.63	5.21016	4.54808	intergenic	vero
peaks_nodup_uniq_vero_infectedAll_rev_peak_1460	HOXC9	11.15	6.39318	5.54043	intergenic	vero
peaks_nodup_uniq_vero_infectedAll_rev_peak_1463	LOC103238425	14.63	3.90762	2.67335	intron	vero
peaks_nodup_uniq_vero_infectedAll_rev_peak_1464	LOC103238427	18.81	3.96213	3.59644	promoter-tss	vero
peaks_nodup_uniq_vero_infectedAll_rev_peak_1465	LOC103238426	24.38	6.34604	9.78363	intron	vero
peaks_nodup_uniq_vero_infectedAll_rev_peak_1466	LOC103238426	9.75	4.33615	2.1056	exon	vero
peaks_nodup_uniq_vero_infectedAll_rev_peak_1467	SMUG1	20.9	5.47518	6.68741	exon	vero
peaks_nodup_uniq_vero_infectedAll_rev_peak_1469a	LOC103238437	24.38	2.59022	1.92262	exon	vero
peaks_nodup_uniq_vero_infectedAll_rev_peak_1469b	LOC103238437	41.8	3.29242	6.66573	exon	vero
peaks_nodup_uniq_vero_infectedAll_rev_peak_1471	PPP1R1A	6.27	6.05851	4.77562	promoter-tss	vero
peaks_nodup_uniq_vero_infectedAll_rev_peak_1475	LOC103238479	10.45	3.81678	1.79641	intergenic	vero
peaks_nodup_uniq_vero_infectedAll_rev_peak_1476	GDF11	9.06	6.61643	5.55339	promoter-tss	vero
peaks_nodup_uniq_vero_infectedAll_rev_peak_1477	GDF11	16.72	3.54411	2.4688	intron	vero
peaks_nodup_uniq_vero_infectedAll_rev_peak_1478b	SARNP	7.66	4.3318	1.72073	intron	vero
peaks_nodup_uniq_vero_infectedAll_rev_peak_1479	DNAJC14	46.68	2.77199	5.39834	exon	vero
peaks_nodup_uniq_vero_infectedAll_rev_peak_1480	MMP19	20.2	5.301	6.68741	intron	vero
peaks_nodup_uniq_vero_infectedAll_rev_peak_1481	WIBG	43.19	2.32604	3.1971	exon	vero
peaks_nodup_uniq_vero_infectedAll_rev_peak_1484	LOC103238513	32.74	4.96242	9.51366	exon	vero
peaks_nodup_uniq_vero_infectedAll_rev_peak_1485	LOC103238527	16.72	4.43014	3.91024	intergenic	vero
peaks_nodup_uniq_vero_infectedAll_rev_peak_1486	LOC103238540	13.24	3.74661	2.38233	intron	vero
peaks_nodup_uniq_vero_infectedAll_rev_peak_1487	ZBTB39	14.63	3.1261	1.48745	exon	vero
peaks_nodup_uniq_vero_infectedAll_rev_peak_1488	ZBTB39	26.47	3.81586	5.23552	exon	vero
peaks_nodup_uniq_vero_infectedAll_rev_peak_1490	STAT6	26.47	4.57904	6.97354	promoter-tss	vero
peaks_nodup_uniq_vero_infectedAll_rev_peak_1491	NDUFA4L2	7.66	4.3318	1.72073	exon	vero
peaks_nodup_uniq_vero_infectedAll_rev_peak_1492	STAC3	12.54	4.23138	2.71667	promoter-tss	vero
peaks_nodup_uniq_vero_infectedAll_rev_peak_1493	STAC3	47.37	2.19886	2.96346	exon	vero
peaks_nodup_uniq_vero_infectedAll_rev_peak_1494	R3HDM2	9.75	5.37683	3.32156	intron	vero
peaks_nodup_uniq_vero_infectedAll_rev_peak_1498	DDIT3	45.28	2.01239	1.96688	tts	vero
peaks_nodup_uniq_vero_infectedAll_rev_peak_1499	MBD6	10.45	5.06653	3.35657	intron	vero
peaks_nodup_uniq_vero_infectedAll_rev_peak_1501	AGAP2	16.02	4.25597	3.91024	exon	vero
peaks_nodup_uniq_vero_infectedAll_rev_peak_1503	MARCH9	15.33	4.0818	3.29483	promoter-tss	vero
peaks_nodup_uniq_vero_infectedAll_rev_peak_1507	LRIG3	41.8	2.51773	3.63037	exon	vero
peaks_nodup_uniq_vero_infectedAll_rev_peak_1509a	LRIG3	16.72	4.43014	3.91024	intron	vero
peaks_nodup_uniq_vero_infectedAll_rev_peak_1513	PPM1H	5.57	4.76342	2.15938	intron	vero
peaks_nodup_uniq_vero_infectedAll_rev_peak_1515	C11H12orf66	4.18	4.33481	2.28299	intron	vero
peaks_nodup_uniq_vero_infectedAll_rev_peak_1516	C11H12orf66	13.93	3.39405	1.62009	exon	vero
peaks_nodup_uniq_vero_infectedAll_rev_peak_1517	C11H12orf66	17.42	6.13908	6.93709	promoter-tss	vero
peaks_nodup_uniq_vero_infectedAll_rev_peak_1518	LOC103238639	4.18	4.33481	2.28299	intron	vero
peaks_nodup_uniq_vero_infectedAll_rev_peak_1519	LOC103238646	4.88	4.91781	2.28299	intergenic	vero
peaks_nodup_uniq_vero_infectedAll_rev_peak_1524	HMGA2	27.17	7.04273	12.2838	promoter-tss	vero
peaks_nodup_uniq_vero_infectedAll_rev_peak_1525	HMGA2	7.66	4.3318	1.72073	promoter-tss	vero
peaks_nodup_uniq_vero_infectedAll_rev_peak_1526	LLPH	58.52	2.9761	8.28304	intron	vero
peaks_nodup_uniq_vero_infectedAll_rev_peak_1527	LLPH	41.1	2.10524	2.10817	exon	vero
peaks_nodup_uniq_vero_infectedAll_rev_peak_1528	HELB	8.36	4.68014	2.4688	exon	vero
peaks_nodup_uniq_vero_infectedAll_rev_peak_1530	LOC103238662	4.88	4.91781	2.28299	intron	vero
peaks_nodup_uniq_vero_infectedAll_rev_peak_1531	LOC103238662	4.18	4.33481	2.28299	intron	vero
peaks_nodup_uniq_vero_infectedAll_rev_peak_1532	GRIP1	6.27	6.05851	4.77562	intron	vero
peaks_nodup_uniq_vero_infectedAll_rev_peak_1533	GRIP1	4.18	4.33481	2.28299	intron	vero
peaks_nodup_uniq_vero_infectedAll_rev_peak_1535	GRIP1	7.66	4.3318	1.72073	intron	vero
peaks_nodup_uniq_vero_infectedAll_rev_peak_1539	LOC103238664	11.15	4.04901	2.41245	intergenic	vero
peaks_nodup_uniq_vero_infectedAll_rev_peak_1540	MDM1	37.62	3.21844	5.71367	exon	vero
peaks_nodup_uniq_vero_infectedAll_rev_peak_1541	MDM2	4.88	4.89736	2.25618	promoter-tss	vero
peaks_nodup_uniq_vero_infectedAll_rev_peak_1542	LOC103238689	34.14	2.92815	4.3594	exon	vero
peaks_nodup_uniq_vero_infectedAll_rev_peak_1543	LOC103238689	28.56	5.68544	9.89448	exon	vero
peaks_nodup_uniq_vero_infectedAll_rev_peak_1545	LOC103239508	4.88	4.91781	2.28299	intron	vero
peaks_nodup_uniq_vero_infectedAll_rev_peak_1546	RAB3IP	8.36	4.68014	2.4688	promoter-tss	vero
peaks_nodup_uniq_vero_infectedAll_rev_peak_1552	THAP2	30.65	2.43495	2.1228	exon	vero
peaks_nodup_uniq_vero_infectedAll_rev_peak_1553	THAP2	25.08	2.37099	1.52598	promoter-tss	vero
peaks_nodup_uniq_vero_infectedAll_rev_peak_1556	CAPS2	11.15	4.04901	2.41245	intron	vero
peaks_nodup_uniq_vero_infectedAll_rev_peak_1558	KRR1	35.53	4.05902	7.99051	intron	vero
peaks_nodup_uniq_vero_infectedAll_rev_peak_1565	OSBPL8	5.57	4.62924	1.96488	intron	vero
peaks_nodup_uniq_vero_infectedAll_rev_peak_1566	OSBPL8	18.81	3.96213	3.59644	intron	vero
peaks_nodup_uniq_vero_infectedAll_rev_peak_1574	PAWR	4.18	4.31678	2.25618	intergenic	vero
peaks_nodup_uniq_vero_infectedAll_rev_peak_1578a	PPP1R12A	18.11	2.98655	2.05676	intron	vero
peaks_nodup_uniq_vero_infectedAll_rev_peak_1581	MYF5	10.45	4.40398	2.50563	intergenic	vero
peaks_nodup_uniq_vero_infectedAll_rev_peak_1584	LIN7A	25.78	5.35551	8.15179	intron	vero
peaks_nodup_uniq_vero_infectedAll_rev_peak_1585	LIN7A	8.36	4.68014	2.4688	intron	vero
peaks_nodup_uniq_vero_infectedAll_rev_peak_1588	LIN7A	14.63	5.21016	4.54808	intron	vero
peaks_nodup_uniq_vero_infectedAll_rev_peak_1589	LIN7A	12.54	4.51347	3.09663	intron	vero
peaks_nodup_uniq_vero_infectedAll_rev_peak_1591	LIN7A	11.84	4.62005	2.85496	intron	vero
peaks_nodup_uniq_vero_infectedAll_rev_peak_1592	LIN7A	13.24	3.55928	2.11967	intron	vero
peaks_nodup_uniq_vero_infectedAll_rev_peak_1594	ACSS3	4.88	4.89736	2.25618	intergenic	vero
peaks_nodup_uniq_vero_infectedAll_rev_peak_1595	ACSS3	4.18	4.33481	2.28299	intergenic	vero
peaks_nodup_uniq_vero_infectedAll_rev_peak_1596	ACSS3	6.27	6.05851	4.77562	intergenic	vero
peaks_nodup_uniq_vero_infectedAll_rev_peak_1600	METTL25	47.37	3.225	7.62864	intergenic	vero
peaks_nodup_uniq_vero_infectedAll_rev_peak_1601	METTL25	20.2	5.04857	6.2478	intergenic	vero
peaks_nodup_uniq_vero_infectedAll_rev_peak_1605	LOC103238813	16.02	6.07995	6.6995	exon	vero
peaks_nodup_uniq_vero_infectedAll_rev_peak_1607	C11H12orf29	22.29	5.82352	8.19476	intron	vero
peaks_nodup_uniq_vero_infectedAll_rev_peak_1610	DUSP6	17.42	3.68345	3.04065	exon	vero
peaks_nodup_uniq_vero_infectedAll_rev_peak_1611	LOC103238833	12.54	4.83587	3.52535	exon	vero
peaks_nodup_uniq_vero_infectedAll_rev_peak_1612	LOC103238833	4.88	4.81707	2.10817	intron	vero
peaks_nodup_uniq_vero_infectedAll_rev_peak_1613	LOC103238833	6.97	6.53025	4.53734	intron	vero
peaks_nodup_uniq_vero_infectedAll_rev_peak_1616	GALNT4	24.38	3.17302	3.33429	exon	vero
peaks_nodup_uniq_vero_infectedAll_rev_peak_1619	POC1B	48.77	3.55488	9.10278	exon	vero
peaks_nodup_uniq_vero_infectedAll_rev_peak_1620	POC1B	36.23	2.32674	2.4641	exon	vero
peaks_nodup_uniq_vero_infectedAll_rev_peak_1621	LOC103238842	25.08	4.34681	6.32583	intergenic	vero
peaks_nodup_uniq_vero_infectedAll_rev_peak_1622	LOC103238842	27.17	2.58449	2.31081	tts	vero
peaks_nodup_uniq_vero_infectedAll_rev_peak_1624	BTG1	5.57	4.38235	1.60405	intergenic	vero
peaks_nodup_uniq_vero_infectedAll_rev_peak_1625	BTG1	13.93	4.97793	3.80568	intergenic	vero
peaks_nodup_uniq_vero_infectedAll_rev_peak_1632	CEP83	8.36	6.68592	5.28496	intron	vero
peaks_nodup_uniq_vero_infectedAll_rev_peak_1633	CEP83	9.75	5.84438	3.90447	intron	vero
peaks_nodup_uniq_vero_infectedAll_rev_peak_1634	CEP83	9.75	5.37683	3.32156	intron	vero
peaks_nodup_uniq_vero_infectedAll_rev_peak_1636	CEP83	12.54	4.51347	3.09663	intron	vero
peaks_nodup_uniq_vero_infectedAll_rev_peak_1639	CEP83	12.54	5.64184	4.58407	intron	vero
peaks_nodup_uniq_vero_infectedAll_rev_peak_1640	CEP83	9.06	4.57135	2.72385	intron	vero
peaks_nodup_uniq_vero_infectedAll_rev_peak_1641	LOC103238883	6.27	3.99462	1.41849	exon	vero
peaks_nodup_uniq_vero_infectedAll_rev_peak_1644	LOC103239472	5.57	5.05655	2.61407	intron	vero
peaks_nodup_uniq_vero_infectedAll_rev_peak_1645	LOC103238891	4.18	4.24602	2.10817	intron	vero
peaks_nodup_uniq_vero_infectedAll_rev_peak_1647	USP44	31.35	3.85132	6.49663	exon	vero
peaks_nodup_uniq_vero_infectedAll_rev_peak_1648	LOC103238898	44.59	1.98209	1.69093	exon	vero
peaks_nodup_uniq_vero_infectedAll_rev_peak_1650	NTN4	7.66	4.3318	1.72073	intron	vero
peaks_nodup_uniq_vero_infectedAll_rev_peak_1652	NTN4	22.99	3.99846	4.54808	promoter-tss	vero
peaks_nodup_uniq_vero_infectedAll_rev_peak_1655a	CDK17	19.51	4.8827	5.55085	intron	vero
peaks_nodup_uniq_vero_infectedAll_rev_peak_1656	CDK17	6.97	4.42606	1.47717	intron	vero
peaks_nodup_uniq_vero_infectedAll_rev_peak_1659a	SLC25A3	25.78	3.82536	4.93229	exon	vero
peaks_nodup_uniq_vero_infectedAll_rev_peak_1659b	SLC25A3	16.72	2.95343	1.48745	exon	vero
peaks_nodup_uniq_vero_infectedAll_rev_peak_1660a	IKBIP	36.92	2.10692	1.52201	exon	vero
peaks_nodup_uniq_vero_infectedAll_rev_peak_1660b	IKBIP	47.37	3.83928	10.1487	exon	vero
peaks_nodup_uniq_vero_infectedAll_rev_peak_1662	LOC103238925	4.18	4.31678	2.25618	intron	vero
peaks_nodup_uniq_vero_infectedAll_rev_peak_1663	LOC103238925	6.97	6.63908	4.77562	intron	vero
peaks_nodup_uniq_vero_infectedAll_rev_peak_1668	ANKS1B	6.27	5.19301	3.06313	intron	vero
peaks_nodup_uniq_vero_infectedAll_rev_peak_1669	ANKS1B	9.06	8.38081	9.02597	intron	vero
peaks_nodup_uniq_vero_infectedAll_rev_peak_1670	ANKS1B	7.66	7.21966	6.12298	intron	vero
peaks_nodup_uniq_vero_infectedAll_rev_peak_1672	ANKS1B	6.97	6.66681	4.82114	intron	vero
peaks_nodup_uniq_vero_infectedAll_rev_peak_1674	ANKS1B	4.18	4.33481	2.28299	intron	vero
peaks_nodup_uniq_vero_infectedAll_rev_peak_1677	LOC103238928	35.53	2.50214	2.93223	exon	vero
peaks_nodup_uniq_vero_infectedAll_rev_peak_1678	UHRF1BP1L	8.36	4.68014	2.4688	intron	vero
peaks_nodup_uniq_vero_infectedAll_rev_peak_1679	UHRF1BP1L	19.51	6.03157	7.42115	intron	vero
peaks_nodup_uniq_vero_infectedAll_rev_peak_1685	SYCP3	41.1	3.8277	8.81842	exon	vero
peaks_nodup_uniq_vero_infectedAll_rev_peak_1687	STAB2	28.56	4.76843	7.92757	intron	vero
peaks_nodup_uniq_vero_infectedAll_rev_peak_1689	LOC103238973	21.6	2.82467	2.02241	exon	vero
peaks_nodup_uniq_vero_infectedAll_rev_peak_1692	NT5DC3	22.99	3.99846	4.54808	exon	vero
peaks_nodup_uniq_vero_infectedAll_rev_peak_1693	HSP90B1	22.29	4.65882	6.09112	promoter-tss	vero
peaks_nodup_uniq_vero_infectedAll_rev_peak_1694	GLT8D2	6.97	6.66681	4.82114	intron	vero
peaks_nodup_uniq_vero_infectedAll_rev_peak_1699	APPL2	32.74	5.62407	11.0684	exon	vero
peaks_nodup_uniq_vero_infectedAll_rev_peak_1701	APPL2	13.93	3.82918	2.25618	intron	vero
peaks_nodup_uniq_vero_infectedAll_rev_peak_1704a	NUAK1	17.42	3.06954	1.9585	exon	vero
peaks_nodup_uniq_vero_infectedAll_rev_peak_1706a	LOC103239024	48.77	2.16384	2.79116	exon	vero
peaks_nodup_uniq_vero_infectedAll_rev_peak_1706b	LOC103239024	36.92	2.06112	1.34756	exon	vero
peaks_nodup_uniq_vero_infectedAll_rev_peak_1707	LOC103239024	45.98	2.34908	3.32156	exon	vero
peaks_nodup_uniq_vero_infectedAll_rev_peak_1708	MTERFD3	26.47	4.57904	6.97354	tts	vero
peaks_nodup_uniq_vero_infectedAll_rev_peak_1709	LOC103239040	23.69	4.11458	5.11591	intron	vero
peaks_nodup_uniq_vero_infectedAll_rev_peak_1710	LOC103239040	15.33	3.54939	2.42432	intron	vero
peaks_nodup_uniq_vero_infectedAll_rev_peak_1711	CRY1	12.54	5.64184	4.58407	intron	vero
peaks_nodup_uniq_vero_infectedAll_rev_peak_1714b	LOC103239049	18.11	2.73056	1.52598	exon	vero
peaks_nodup_uniq_vero_infectedAll_rev_peak_1715	PRDM4	15.33	3.26544	1.99445	intron	vero
peaks_nodup_uniq_vero_infectedAll_rev_peak_1716	PRDM4	15.33	3.26544	1.99445	exon	vero
peaks_nodup_uniq_vero_infectedAll_rev_peak_1717	LOC103239059	4.18	4.33481	2.28299	intergenic	vero
peaks_nodup_uniq_vero_infectedAll_rev_peak_1718	SELPLG	15.33	7.42145	8.09077	intergenic	vero
peaks_nodup_uniq_vero_infectedAll_rev_peak_1719	SELPLG	25.08	4.82979	7.36963	exon	vero
peaks_nodup_uniq_vero_infectedAll_rev_peak_1720	SELPLG	45.98	2.13552	2.36446	exon	vero
peaks_nodup_uniq_vero_infectedAll_rev_peak_1722	SSH1	41.8	2.67509	4.27394	exon	vero
peaks_nodup_uniq_vero_infectedAll_rev_peak_1723	SSH1	10.45	4.77098	2.99547	intron	vero
peaks_nodup_uniq_vero_infectedAll_rev_peak_1726	LOC103239084	46.68	2.8046	5.54455	exon	vero
peaks_nodup_uniq_vero_infectedAll_rev_peak_1729	TRPV4	12.54	3.38511	1.55482	intron	vero
peaks_nodup_uniq_vero_infectedAll_rev_peak_1730	LOC103239097	11.84	6.42187	5.10709	intron	vero
peaks_nodup_uniq_vero_infectedAll_rev_peak_1732b	LOC103239107	40.41	2.30045	2.72385	exon	vero
peaks_nodup_uniq_vero_infectedAll_rev_peak_1735	MAPKAPK5	13.24	5.08468	4.27997	intergenic	vero
peaks_nodup_uniq_vero_infectedAll_rev_peak_1736	MAPKAPK5	7.66	4.3318	1.72073	promoter-tss	vero
peaks_nodup_uniq_vero_infectedAll_rev_peak_1738	TMEM116	4.18	4.31678	2.25618	intron	vero
peaks_nodup_uniq_vero_infectedAll_rev_peak_1739	LOC103239137	26.47	6.86856	11.4298	exon	vero
peaks_nodup_uniq_vero_infectedAll_rev_peak_1741	TRAFD1	8.36	5.37947	3.38281	intergenic	vero
peaks_nodup_uniq_vero_infectedAll_rev_peak_1744	LOC103239147	9.75	5.37683	3.32156	intron	vero
peaks_nodup_uniq_vero_infectedAll_rev_peak_1745	LOC103239146	23.69	4.11458	5.11591	exon	vero
peaks_nodup_uniq_vero_infectedAll_rev_peak_1746	LOC103239146	21.6	2.82467	2.02241	intron	vero
peaks_nodup_uniq_vero_infectedAll_rev_peak_1747	LOC103239158	7.66	4.3318	1.72073	exon	vero
peaks_nodup_uniq_vero_infectedAll_rev_peak_1748a	CCDC42B	49.47	2.10271	2.63542	tts	vero
peaks_nodup_uniq_vero_infectedAll_rev_peak_1750	SDS	9.06	5.02849	3.32156	intergenic	vero
peaks_nodup_uniq_vero_infectedAll_rev_peak_1753	LOC103239194	4.18	4.33481	2.28299	intergenic	vero
peaks_nodup_uniq_vero_infectedAll_rev_peak_1756	MED13L	8.36	4.68014	2.4688	intron	vero
peaks_nodup_uniq_vero_infectedAll_rev_peak_1757	MED13L	14.63	3.90762	2.67335	intron	vero
peaks_nodup_uniq_vero_infectedAll_rev_peak_1758	MED13L	12.54	3.38511	1.55482	intron	vero
peaks_nodup_uniq_vero_infectedAll_rev_peak_1759	MED13L	8.36	4.68014	2.4688	intron	vero
peaks_nodup_uniq_vero_infectedAll_rev_peak_1761	LOC103239207	8.36	4.68014	2.4688	intron	vero
peaks_nodup_uniq_vero_infectedAll_rev_peak_1762	LOC103239207	4.88	4.91781	2.28299	tts	vero
peaks_nodup_uniq_vero_infectedAll_rev_peak_1763	LOC103239210	4.88	4.81707	2.10817	intron	vero
peaks_nodup_uniq_vero_infectedAll_rev_peak_1764	LOC103239210	4.18	4.24602	2.10817	tts	vero
peaks_nodup_uniq_vero_infectedAll_rev_peak_1767	LOC103239529	4.18	4.33481	2.28299	intron	vero
peaks_nodup_uniq_vero_infectedAll_rev_peak_1771	LOC103239215	11.84	4.28124	2.41245	exon	vero
peaks_nodup_uniq_vero_infectedAll_rev_peak_1772	KSR2	10.45	5.72518	4.1955	intron	vero
peaks_nodup_uniq_vero_infectedAll_rev_peak_1777	LOC103239221	27.87	5.77352	9.59558	exon	vero
peaks_nodup_uniq_vero_infectedAll_rev_peak_1778	LOC103239221	9.06	5.58721	4.06676	intron	vero
peaks_nodup_uniq_vero_infectedAll_rev_peak_1780	LOC103239221	33.44	5.74019	11.7835	intron	vero
peaks_nodup_uniq_vero_infectedAll_rev_peak_1781	TAOK3	7.66	6.18828	4.15648	intron	vero
peaks_nodup_uniq_vero_infectedAll_rev_peak_1782	LOC103239223	9.06	5.02849	3.32156	intron	vero
peaks_nodup_uniq_vero_infectedAll_rev_peak_1783	LOC103239223	4.18	4.31678	2.25618	intron	vero
peaks_nodup_uniq_vero_infectedAll_rev_peak_1785	TAOK3	26.47	5.49485	8.87712	intron	vero
peaks_nodup_uniq_vero_infectedAll_rev_peak_1786	PRKAB1	13.93	5.74377	4.81816	tts	vero
peaks_nodup_uniq_vero_infectedAll_rev_peak_1787	PRKAB1	7.66	4.3318	1.72073	exon	vero
peaks_nodup_uniq_vero_infectedAll_rev_peak_1788	PRKAB1	9.75	5.37683	3.32156	intron	vero
peaks_nodup_uniq_vero_infectedAll_rev_peak_1790	CCDC64	8.36	4.68014	2.4688	intergenic	vero
peaks_nodup_uniq_vero_infectedAll_rev_peak_1795	SPPL3	18.11	3.82279	3.59644	intron	vero
peaks_nodup_uniq_vero_infectedAll_rev_peak_1796a	SPPL3	17.42	2.97052	1.77025	intron	vero
peaks_nodup_uniq_vero_infectedAll_rev_peak_1797a	HNF1A	29.26	6.0522	11.1172	intron	vero
peaks_nodup_uniq_vero_infectedAll_rev_peak_1797b	HNF1A	38.32	7.86359	18.5203	intron	vero
peaks_nodup_uniq_vero_infectedAll_rev_peak_1797c	HNF1A	21.6	5.64935	7.44014	intron	vero
peaks_nodup_uniq_vero_infectedAll_rev_peak_1798	C11H12orf43	30.65	2.63786	2.72051	exon	vero
peaks_nodup_uniq_vero_infectedAll_rev_peak_1799	RNF34	19.51	5.12683	5.97558	exon	vero
peaks_nodup_uniq_vero_infectedAll_rev_peak_1800	KDM2B	12.54	6.77021	6.07627	intron	vero
peaks_nodup_uniq_vero_infectedAll_rev_peak_1801	RHOF	20.9	3.31829	2.78255	exon	vero
peaks_nodup_uniq_vero_infectedAll_rev_peak_1802	RHOF	22.99	3.52805	3.57598	exon	vero
peaks_nodup_uniq_vero_infectedAll_rev_peak_1803	SETD1B	4.18	4.33481	2.28299	exon	vero
peaks_nodup_uniq_vero_infectedAll_rev_peak_1804	BCL7A	13.93	3.73345	2.11967	promoter-tss	vero
peaks_nodup_uniq_vero_infectedAll_rev_peak_1805	DIABLO	20.2	2.6505	1.59452	exon	vero
peaks_nodup_uniq_vero_infectedAll_rev_peak_1807	VPS33A	27.87	2.88676	2.96739	exon	vero
peaks_nodup_uniq_vero_infectedAll_rev_peak_1810b	CLIP1	27.17	2.42853	1.88722	exon	vero
peaks_nodup_uniq_vero_infectedAll_rev_peak_1811	CLIP1	53.65	2.37588	4.37591	exon	vero
peaks_nodup_uniq_vero_infectedAll_rev_peak_1812	ZCCHC8	34.83	2.7565	3.59644	exon	vero
peaks_nodup_uniq_vero_infectedAll_rev_peak_1813	ZCCHC8	25.08	2.37099	1.52598	exon	vero
peaks_nodup_uniq_vero_infectedAll_rev_peak_1814	ZCCHC8	22.29	3.32773	3.35657	intron	vero
peaks_nodup_uniq_vero_infectedAll_rev_peak_1815a	ARL6IP4	20.2	7.068	9.52745	intron	vero
peaks_nodup_uniq_vero_infectedAll_rev_peak_1817	PITPNM2	6.97	5.53257	2.83641	intron	vero
peaks_nodup_uniq_vero_infectedAll_rev_peak_1818	PITPNM2	6.27	4.54388	2.12632	intron	vero
peaks_nodup_uniq_vero_infectedAll_rev_peak_1822	SNRNP35	22.29	4.85293	6.44947	intron	vero
peaks_nodup_uniq_vero_infectedAll_rev_peak_1823a	RILPL1	39.01	4.44607	10.354	intron	vero
peaks_nodup_uniq_vero_infectedAll_rev_peak_1823b	RILPL1	20.9	3.53237	3.21831	intron	vero
peaks_nodup_uniq_vero_infectedAll_rev_peak_1824	RILPL1	29.96	3.43974	4.77851	intron	vero
peaks_nodup_uniq_vero_infectedAll_rev_peak_1826	CCDC92	7.66	4.81311	2.28299	promoter-tss	vero
peaks_nodup_uniq_vero_infectedAll_rev_peak_1827	LOC103239349	56.43	2.05114	2.93705	tts	vero
peaks_nodup_uniq_vero_infectedAll_rev_peak_1828	LOC103239349	17.42	3.04921	1.91827	intron	vero
peaks_nodup_uniq_vero_infectedAll_rev_peak_1829a	LOC103239347	81.51	1.75559	2.48357	exon	vero
peaks_nodup_uniq_vero_infectedAll_rev_peak_1829b	LOC103239347	64.1	2.41094	5.92142	exon	vero
peaks_nodup_uniq_vero_infectedAll_rev_peak_1830	LOC103239347	22.29	3.32773	3.35657	intron	vero
peaks_nodup_uniq_vero_infectedAll_rev_peak_1831	NCOR2	32.74	3.74938	6.31286	intron	vero
peaks_nodup_uniq_vero_infectedAll_rev_peak_1832	NCOR2	21.6	3.8961	4.24098	intron	vero
peaks_nodup_uniq_vero_infectedAll_rev_peak_1833	NCOR2	37.62	6.43688	14.8269	intron	vero
peaks_nodup_uniq_vero_infectedAll_rev_peak_1835	NCOR2	11.84	5.35156	3.77506	promoter-tss	vero
peaks_nodup_uniq_vero_infectedAll_rev_peak_1840	BRI3BP	6.97	6.63908	4.77562	exon	vero
peaks_nodup_uniq_vero_infectedAll_rev_peak_1843	GLT1D1	11.15	6.07352	5.10709	intron	vero
peaks_nodup_uniq_vero_infectedAll_rev_peak_1852a	GALNT9	42.5	3.10701	6.2091	intron	vero
peaks_nodup_uniq_vero_infectedAll_rev_peak_1852b	GALNT9	39.71	3.39261	6.66916	intron	vero
peaks_nodup_uniq_vero_infectedAll_rev_peak_1852c	GALNT9	28.56	2.27418	1.44653	intron	vero
peaks_nodup_uniq_vero_infectedAll_rev_peak_1852d	GALNT9	35.53	4.5664	9.43195	intron	vero
peaks_nodup_uniq_vero_infectedAll_rev_peak_1852e	GALNT9	20.9	3.53237	3.21831	intron	vero
peaks_nodup_uniq_vero_infectedAll_rev_peak_1853	LOC103239442	20.2	3.02914	2.40412	intergenic	vero
peaks_nodup_uniq_vero_infectedAll_rev_peak_1855	LOC103239444	4.18	4.33481	2.28299	intergenic	vero
peaks_nodup_uniq_vero_infectedAll_rev_peak_1856	LOC103239445	12.54	4.23138	2.71667	intergenic	vero
peaks_nodup_uniq_vero_infectedAll_rev_peak_1859	PGAM5	14.63	8.68361	9.24783	intergenic	vero
peaks_nodup_uniq_vero_infectedAll_rev_peak_1861	LOC103239476	52.25	2.42053	4.58862	promoter-tss	vero
peaks_nodup_uniq_vero_infectedAll_rev_peak_1862	LOC103239476	11.84	3.73364	1.73389	intron	vero
peaks_nodup_uniq_vero_infectedAll_rev_peak_1863a	LOC103239476	33.44	2.64932	3.21433	intron	vero
peaks_nodup_uniq_vero_infectedAll_rev_peak_1863b	LOC103239476	18.81	3.80974	3.33329	intron	vero
peaks_nodup_uniq_vero_infectedAll_rev_peak_1865	ZNF605	22.99	2.66564	1.68794	exon	vero
peaks_nodup_uniq_vero_infectedAll_rev_peak_1866c	ZNF605	16.02	2.83731	1.48745	exon	vero
peaks_nodup_uniq_vero_infectedAll_rev_peak_1867	ZNF605	10.45	3.81678	1.79641	intron	vero
peaks_nodup_uniq_vero_infectedAll_rev_peak_1868	ZNF605	9.75	4.13602	1.85192	intron	vero
peaks_nodup_uniq_vero_infectedAll_rev_peak_1870a	ZNF891	14.63	4.5972	3.68567	exon	vero
peaks_nodup_uniq_vero_infectedAll_rev_peak_1871	LOC103239540	9.06	4.57135	2.72385	intron	vero
peaks_nodup_uniq_vero_infectedAll_rev_peak_1872	LOC103239540	8.36	4.68014	2.4688	intron	vero
peaks_nodup_uniq_vero_infectedAll_rev_peak_1874	LOC103239540	32.74	4.82063	9.14567	exon	vero
peaks_nodup_uniq_vero_infectedAll_rev_peak_1875	LOC103239540	20.9	4.38014	4.80775	intron	vero
peaks_nodup_uniq_vero_infectedAll_rev_peak_1876	CACNA1B	9.75	5.37683	3.32156	intron	vero
peaks_nodup_uniq_vero_infectedAll_rev_peak_1878	CACNA1B	9.06	4.69952	2.90309	intron	vero
peaks_nodup_uniq_vero_infectedAll_rev_peak_1881	CACNA1B	6.27	5.11987	2.9538	intron	vero
peaks_nodup_uniq_vero_infectedAll_rev_peak_1883	LOC103239543	13.24	3.38979	1.85935	exon	vero
peaks_nodup_uniq_vero_infectedAll_rev_peak_1884	LOC103239543	7.66	4.24686	1.62132	intron	vero
peaks_nodup_uniq_vero_infectedAll_rev_peak_1885	LOC103239543	13.93	9.10598	9.26336	intron	vero
peaks_nodup_uniq_vero_infectedAll_rev_peak_1886	LOC103239542	18.81	3.96213	3.59644	intron	vero
peaks_nodup_uniq_vero_infectedAll_rev_peak_1888	DPH7	7.66	4.3318	1.72073	tts	vero
peaks_nodup_uniq_vero_infectedAll_rev_peak_1890	DPH7	4.18	4.33481	2.28299	intron	vero
peaks_nodup_uniq_vero_infectedAll_rev_peak_1893a	LOC103239561	26.47	2.92279	3.0213	exon	vero
peaks_nodup_uniq_vero_infectedAll_rev_peak_1894	LOC103239561	26.47	3.19468	3.71806	exon	vero
peaks_nodup_uniq_vero_infectedAll_rev_peak_1895	TOR4A	34.14	2.70291	3.59644	intron	vero
peaks_nodup_uniq_vero_infectedAll_rev_peak_1896	SLC34A3	10.45	3.81678	1.79641	promoter-tss	vero
peaks_nodup_uniq_vero_infectedAll_rev_peak_1898	LOC103239574	27.87	3.70097	5.06297	exon	vero
peaks_nodup_uniq_vero_infectedAll_rev_peak_1899	NDOR1	27.87	2.83016	2.80823	intron	vero
peaks_nodup_uniq_vero_infectedAll_rev_peak_1902	FBXW5	26.47	3.05269	3.34777	intergenic	vero
peaks_nodup_uniq_vero_infectedAll_rev_peak_1903	FBXW5	16.72	2.95343	1.48745	exon	vero
peaks_nodup_uniq_vero_infectedAll_rev_peak_1904	TRAF2	11.84	5.35156	3.77506	intron	vero
peaks_nodup_uniq_vero_infectedAll_rev_peak_1905	PHPT1	12.54	4.51347	3.09663	promoter-tss	vero
peaks_nodup_uniq_vero_infectedAll_rev_peak_1906	LOC103239608	13.93	4.97793	3.80568	intron	vero
peaks_nodup_uniq_vero_infectedAll_rev_peak_1907	LOC103239607	16.02	5.67462	6.10595	intron	vero
peaks_nodup_uniq_vero_infectedAll_rev_peak_1908	EGFL7	34.14	2.19611	1.84628	intergenic	vero
peaks_nodup_uniq_vero_infectedAll_rev_peak_1909	EGFL7	18.11	4.42452	4.66955	intergenic	vero
peaks_nodup_uniq_vero_infectedAll_rev_peak_1911	LOC103239622	9.06	5.02849	3.32156	tts	vero
peaks_nodup_uniq_vero_infectedAll_rev_peak_1914	C12H9orf69	4.88	4.89736	2.25618	promoter-tss	vero
peaks_nodup_uniq_vero_infectedAll_rev_peak_1918	CAMSAP1	8.36	5.85018	4.01918	intergenic	vero
peaks_nodup_uniq_vero_infectedAll_rev_peak_1919	CAMSAP1	25.78	3.82536	4.93229	intergenic	vero
peaks_nodup_uniq_vero_infectedAll_rev_peak_1920	KCNT1	21.6	12.5541	17.6609	intron	vero
peaks_nodup_uniq_vero_infectedAll_rev_peak_1923a	PPP1R26	44.59	2.30243	3.09663	exon	vero
peaks_nodup_uniq_vero_infectedAll_rev_peak_1923b	PPP1R26	37.62	2.14563	1.81317	exon	vero
peaks_nodup_uniq_vero_infectedAll_rev_peak_1925a	LOC103239661	32.74	2.41032	2.25128	intron	vero
peaks_nodup_uniq_vero_infectedAll_rev_peak_1925b	LOC103239661	57.13	4.76464	16.6061	intron	vero
peaks_nodup_uniq_vero_infectedAll_rev_peak_1925c	LOC103239661	27.87	2.62433	2.25618	intron	vero
peaks_nodup_uniq_vero_infectedAll_rev_peak_1927	LOC103239663	9.06	6.44678	5.28594	intron	vero
peaks_nodup_uniq_vero_infectedAll_rev_peak_1929a	LOC103239663	20.2	5.301	6.68741	intron	vero
peaks_nodup_uniq_vero_infectedAll_rev_peak_1929b	LOC103239663	22.29	5.82352	8.19476	intron	vero
peaks_nodup_uniq_vero_infectedAll_rev_peak_1933	WDR5	27.17	3.52136	4.82114	exon	vero
peaks_nodup_uniq_vero_infectedAll_rev_peak_1934	WDR5	16.02	3.40477	2.4688	intron	vero
peaks_nodup_uniq_vero_infectedAll_rev_peak_1935	LOC103239673	21.6	3.0537	2.47468	exon	vero
peaks_nodup_uniq_vero_infectedAll_rev_peak_1943	C12H9orf96	5.57	4.69537	2.06426	intron	vero
peaks_nodup_uniq_vero_infectedAll_rev_peak_1944	SURF1	9.75	4.10445	1.8127	tts	vero
peaks_nodup_uniq_vero_infectedAll_rev_peak_1945	CEL	23.69	2.74305	2.0968	exon	vero
peaks_nodup_uniq_vero_infectedAll_rev_peak_1949	GTF3C4	19.51	2.92962	1.97494	promoter-tss	vero
peaks_nodup_uniq_vero_infectedAll_rev_peak_1950	C12H9orf171	9.06	5.02849	3.32156	intron	vero
peaks_nodup_uniq_vero_infectedAll_rev_peak_1951	LOC103239731	45.28	2.43605	3.86918	intron	vero
peaks_nodup_uniq_vero_infectedAll_rev_peak_1952	PPAPDC3	25.78	8.92585	14.248	intron	vero
peaks_nodup_uniq_vero_infectedAll_rev_peak_1953	QRFP	42.5	2.28937	2.86698	exon	vero
peaks_nodup_uniq_vero_infectedAll_rev_peak_1954	ABL1	18.11	5.97311	7.17055	intron	vero
peaks_nodup_uniq_vero_infectedAll_rev_peak_1955	ABL1	19.51	3.41789	2.9208	intron	vero
peaks_nodup_uniq_vero_infectedAll_rev_peak_1956	ABL1	19.51	4.10146	4.1955	intron	vero
peaks_nodup_uniq_vero_infectedAll_rev_peak_1957	ABL1	13.24	4.7457	3.80568	intron	vero
peaks_nodup_uniq_vero_infectedAll_rev_peak_1959a	NCS1	25.08	4.65729	7.00938	exon	vero
peaks_nodup_uniq_vero_infectedAll_rev_peak_1962	LOC103239751	20.9	4.38014	4.80775	promoter-tss	vero
peaks_nodup_uniq_vero_infectedAll_rev_peak_1965	LOC103239767	16.72	3.69178	2.7267	intergenic	vero
peaks_nodup_uniq_vero_infectedAll_rev_peak_1967	LOC103239767	14.63	3.1261	1.48745	intergenic	vero
peaks_nodup_uniq_vero_infectedAll_rev_peak_1968	LOC103239767	15.33	5.44239	5.2993	intergenic	vero
peaks_nodup_uniq_vero_infectedAll_rev_peak_1970	FAM73B	5.57	4.69537	2.06426	intron	vero
peaks_nodup_uniq_vero_infectedAll_rev_peak_1971a	PHYHD1	8.36	3.90012	1.55482	exon	vero
peaks_nodup_uniq_vero_infectedAll_rev_peak_1973	SWI5	8.36	4.06969	1.76926	intron	vero
peaks_nodup_uniq_vero_infectedAll_rev_peak_1975	TOR2A	11.84	4.28124	2.41245	tts	vero
peaks_nodup_uniq_vero_infectedAll_rev_peak_1976	TOR2A	12.54	4.51347	3.09663	exon	vero
peaks_nodup_uniq_vero_infectedAll_rev_peak_1978	C12H9orf117	9.75	5.37683	3.32156	intron	vero
peaks_nodup_uniq_vero_infectedAll_rev_peak_1980	RPL12	16.02	5.59996	6.01568	tts	vero
peaks_nodup_uniq_vero_infectedAll_rev_peak_1982	SLC2A8	11.84	6.42187	5.10709	intron	vero
peaks_nodup_uniq_vero_infectedAll_rev_peak_1986	LOC103239849	7.66	4.3318	1.72073	intron	vero
peaks_nodup_uniq_vero_infectedAll_rev_peak_1987	ZBTB34	22.29	3.88235	4.54808	exon	vero
peaks_nodup_uniq_vero_infectedAll_rev_peak_1988	ZBTB34	21.6	3.2282	2.87503	exon	vero
peaks_nodup_uniq_vero_infectedAll_rev_peak_1990	ZBTB43	23.69	3.85742	4.58407	exon	vero
peaks_nodup_uniq_vero_infectedAll_rev_peak_1991	ZBTB43	29.26	2.751	3.03921	exon	vero
peaks_nodup_uniq_vero_infectedAll_rev_peak_1992	ZBTB43	19.51	3.20427	2.47565	exon	vero
peaks_nodup_uniq_vero_infectedAll_rev_peak_1996	LOC103239860	16.02	7.09328	8.16725	intergenic	vero
peaks_nodup_uniq_vero_infectedAll_rev_peak_1999	LOC103239864	5.57	4.69537	2.06426	intron	vero
peaks_nodup_uniq_vero_infectedAll_rev_peak_2000	LOC103239864	4.18	4.31678	2.25618	intron	vero
peaks_nodup_uniq_vero_infectedAll_rev_peak_2001	LOC103239864	4.18	4.33481	2.28299	intron	vero
peaks_nodup_uniq_vero_infectedAll_rev_peak_2002	GAPVD1	20.9	2.67082	1.46341	exon	vero
peaks_nodup_uniq_vero_infectedAll_rev_peak_2004b	RPL35	14.63	3.90762	2.67335	exon	vero
peaks_nodup_uniq_vero_infectedAll_rev_peak_2009	RABGAP1	11.15	5.52138	4.37591	intron	vero
peaks_nodup_uniq_vero_infectedAll_rev_peak_2010	RABGAP1	9.06	5.02849	3.32156	intron	vero
peaks_nodup_uniq_vero_infectedAll_rev_peak_2012	RABGAP1	10.45	6.50588	5.22794	intron	vero
peaks_nodup_uniq_vero_infectedAll_rev_peak_2014	PTGS1	32.05	4.72111	9.14567	intergenic	vero
peaks_nodup_uniq_vero_infectedAll_rev_peak_2015	MRRF	7.66	6.18828	4.15648	intron	vero
peaks_nodup_uniq_vero_infectedAll_rev_peak_2018	MORN5	6.27	4.66039	2.28216	intron	vero
peaks_nodup_uniq_vero_infectedAll_rev_peak_2019	DAB2IP	27.87	5.55146	9.15154	intron	vero
peaks_nodup_uniq_vero_infectedAll_rev_peak_2020	DAB2IP	30.65	3.51715	5.26218	tts	vero
peaks_nodup_uniq_vero_infectedAll_rev_peak_2023	LOC103218904	17.42	4.60431	4.57711	intron	vero
peaks_nodup_uniq_vero_infectedAll_rev_peak_2026	LOC103218904	9.75	6.89337	5.28594	intergenic	vero
peaks_nodup_uniq_vero_infectedAll_rev_peak_2027	LOC103218904	8.36	5.20016	3.1523	intergenic	vero
peaks_nodup_uniq_vero_infectedAll_rev_peak_2028a	LOC103218904	11.15	6.74836	6.05172	intergenic	vero
peaks_nodup_uniq_vero_infectedAll_rev_peak_2028b	LOC103218904	8.36	5.44202	3.46282	intergenic	vero
peaks_nodup_uniq_vero_infectedAll_rev_peak_2029	LOC103218904	11.15	5.52138	4.37591	intergenic	vero
peaks_nodup_uniq_vero_infectedAll_rev_peak_2030	LOC103218903	31.35	2.48854	2.44654	promoter-tss	vero
peaks_nodup_uniq_vero_infectedAll_rev_peak_2031	GSN	13.93	3.73345	2.11967	intron	vero
peaks_nodup_uniq_vero_infectedAll_rev_peak_2033	RAB14	13.24	4.7457	3.80568	intron	vero
peaks_nodup_uniq_vero_infectedAll_rev_peak_2034	CNTRL	6.97	5.94545	3.45393	intron	vero
peaks_nodup_uniq_vero_infectedAll_rev_peak_2035	CNTRL	17.42	6.13908	6.93709	exon	vero
peaks_nodup_uniq_vero_infectedAll_rev_peak_2036	CNTRL	5.57	4.69537	2.06426	exon	vero
peaks_nodup_uniq_vero_infectedAll_rev_peak_2038	CNTRL	8.36	5.85018	4.01918	intergenic	vero
peaks_nodup_uniq_vero_infectedAll_rev_peak_2040	PSMD5	18.81	4.95266	5.2468	intergenic	vero
peaks_nodup_uniq_vero_infectedAll_rev_peak_2052	ORM1	5.57	4.2138	1.38309	intron	vero
peaks_nodup_uniq_vero_infectedAll_rev_peak_2054	ORM1	16.72	8.86028	10.1754	intron	vero
peaks_nodup_uniq_vero_infectedAll_rev_peak_2056	COL27A1	30.65	2.43495	2.1228	exon	vero
peaks_nodup_uniq_vero_infectedAll_rev_peak_2057	KIF12	6.97	4.97931	2.12632	intergenic	vero
peaks_nodup_uniq_vero_infectedAll_rev_peak_2058	AMBP	16.72	5.90685	6.10595	intergenic	vero
peaks_nodup_uniq_vero_infectedAll_rev_peak_2060	AMBP	58.52	3.46058	10.8011	exon	vero
peaks_nodup_uniq_vero_infectedAll_rev_peak_2061	AMBP	41.8	2.14007	2.10817	exon	vero
peaks_nodup_uniq_vero_infectedAll_rev_peak_2062	ZNF618	16.72	3.54411	2.4688	intron	vero
peaks_nodup_uniq_vero_infectedAll_rev_peak_2063	RGS3	8.36	4.68014	2.4688	intron	vero
peaks_nodup_uniq_vero_infectedAll_rev_peak_2064	RGS3	37.62	2.92585	4.69403	tts	vero
peaks_nodup_uniq_vero_infectedAll_rev_peak_2065	RGS3	30.65	2.26103	1.56825	exon	vero
peaks_nodup_uniq_vero_infectedAll_rev_peak_2066	RNF183	26.47	5.08782	8.05675	tts	vero
peaks_nodup_uniq_vero_infectedAll_rev_peak_2070	KIAA1958	20.2	3.31313	2.99895	exon	vero
peaks_nodup_uniq_vero_infectedAll_rev_peak_2071	KIAA1958	6.97	5.38304	2.62199	intron	vero
peaks_nodup_uniq_vero_infectedAll_rev_peak_2073	UGCG	5.57	5.47793	3.46282	intergenic	vero
peaks_nodup_uniq_vero_infectedAll_rev_peak_2074	UGCG	36.92	4.21384	8.56571	promoter-tss	vero
peaks_nodup_uniq_vero_infectedAll_rev_peak_2075	GNG10	24.38	4.23069	5.72581	intron	vero
peaks_nodup_uniq_vero_infectedAll_rev_peak_2076	GNG10	29.26	2.751	3.03921	exon	vero
peaks_nodup_uniq_vero_infectedAll_rev_peak_2077	ZNF483	21.6	5.94668	7.94059	exon	vero
peaks_nodup_uniq_vero_infectedAll_rev_peak_2080a	LOC103219029	21.6	4.34565	5.10709	tts	vero
peaks_nodup_uniq_vero_infectedAll_rev_peak_2080b	LOC103219029	25.78	2.67775	2.16897	tts	vero
peaks_nodup_uniq_vero_infectedAll_rev_peak_2081	AKAP2	4.18	4.17753	1.9585	intron	vero
peaks_nodup_uniq_vero_infectedAll_rev_peak_2082	AKAP2	6.27	6.05851	4.77562	intron	vero
peaks_nodup_uniq_vero_infectedAll_rev_peak_2087	AKAP2	12.54	11.3308	13.8187	intron	vero
peaks_nodup_uniq_vero_infectedAll_rev_peak_2088	AKAP2	4.88	4.89736	2.25618	intergenic	vero
peaks_nodup_uniq_vero_infectedAll_rev_peak_2093	PTPN3	6.97	5.53257	2.83641	intergenic	vero
peaks_nodup_uniq_vero_infectedAll_rev_peak_2094a	RAD23B	10.45	3.57823	1.48773	intron	vero
peaks_nodup_uniq_vero_infectedAll_rev_peak_2094b	RAD23B	12.54	3.38511	1.55482	intron	vero
peaks_nodup_uniq_vero_infectedAll_rev_peak_2097	ZNF462	13.24	5.93213	5.42236	intron	vero
peaks_nodup_uniq_vero_infectedAll_rev_peak_2098	ZNF462	20.9	3.31829	2.78255	exon	vero
peaks_nodup_uniq_vero_infectedAll_rev_peak_2099	ZNF462	22.29	3.88235	4.54808	promoter-tss	vero
peaks_nodup_uniq_vero_infectedAll_rev_peak_2106	FKTN	12.54	6.38699	5.55349	intron	vero
peaks_nodup_uniq_vero_infectedAll_rev_peak_2107	FKTN	13.93	5.74377	4.81816	intron	vero
peaks_nodup_uniq_vero_infectedAll_rev_peak_2110	SLC44A1	8.36	4.68014	2.4688	promoter-tss	vero
peaks_nodup_uniq_vero_infectedAll_rev_peak_2113	SMC2	17.42	4.60431	4.57711	intron	vero
peaks_nodup_uniq_vero_infectedAll_rev_peak_2114	SMC2	20.2	7.068	9.52745	intron	vero
peaks_nodup_uniq_vero_infectedAll_rev_peak_2115	RNF20	47.37	4.39772	12.2538	intron	vero
peaks_nodup_uniq_vero_infectedAll_rev_peak_2116	RNF20	73.15	2.55698	7.95529	exon	vero
peaks_nodup_uniq_vero_infectedAll_rev_peak_2118	ZNF189	27.87	4.12394	6.07627	exon	vero
peaks_nodup_uniq_vero_infectedAll_rev_peak_2119	ZNF189	25.08	2.55695	2.04272	exon	vero
peaks_nodup_uniq_vero_infectedAll_rev_peak_2120	ZNF189	28.56	2.27418	1.44653	exon	vero
peaks_nodup_uniq_vero_infectedAll_rev_peak_2121	MSANTD3	19.51	4.10146	4.1955	intergenic	vero
peaks_nodup_uniq_vero_infectedAll_rev_peak_2122	MSANTD3	39.01	4.44607	10.354	exon	vero
peaks_nodup_uniq_vero_infectedAll_rev_peak_2125	LOC103219866	23.69	4.11458	5.11591	intron	vero
peaks_nodup_uniq_vero_infectedAll_rev_peak_2126	LOC103219866	24.38	2.82046	2.4688	intron	vero
peaks_nodup_uniq_vero_infectedAll_rev_peak_2127	LOC103219866	15.33	4.71884	4.25933	intron	vero
peaks_nodup_uniq_vero_infectedAll_rev_peak_2128	LOC103219866	18.11	3.18566	2.41245	intron	vero
peaks_nodup_uniq_vero_infectedAll_rev_peak_2129	LOC103219866	15.33	3.26544	1.99445	intron	vero
peaks_nodup_uniq_vero_infectedAll_rev_peak_2131	LOC103219129	8.36	4.68014	2.4688	promoter-tss	vero
peaks_nodup_uniq_vero_infectedAll_rev_peak_2133	LOC103219867	16.72	4.43014	3.91024	exon	vero
peaks_nodup_uniq_vero_infectedAll_rev_peak_2134	LOC103219867	9.06	4.61329	2.78365	promoter-tss	vero
peaks_nodup_uniq_vero_infectedAll_rev_peak_2135	SEC61B	27.87	3.60845	4.82114	intergenic	vero
peaks_nodup_uniq_vero_infectedAll_rev_peak_2138	LOC103219156	12.54	6.77021	6.07627	intergenic	vero
peaks_nodup_uniq_vero_infectedAll_rev_peak_2139	TDRD7	8.36	4.68014	2.4688	intron	vero
peaks_nodup_uniq_vero_infectedAll_rev_peak_2141	TDRD7	5.57	5.47793	3.46282	intron	vero
peaks_nodup_uniq_vero_infectedAll_rev_peak_2144	LOC103219846	15.33	3.26544	1.99445	intron	vero
peaks_nodup_uniq_vero_infectedAll_rev_peak_2145	ALDH1B1	14.63	5.21016	4.54808	intergenic	vero
peaks_nodup_uniq_vero_infectedAll_rev_peak_2146	ALDH1B1	63.4	1.83997	2.17759	exon	vero
peaks_nodup_uniq_vero_infectedAll_rev_peak_2148	ALDH1B1	4.18	4.31678	2.25618	intergenic	vero
peaks_nodup_uniq_vero_infectedAll_rev_peak_2149	ALDH1B1	6.27	6.05851	4.77562	intergenic	vero
peaks_nodup_uniq_vero_infectedAll_rev_peak_2150	SHB	4.88	4.91781	2.28299	intron	vero
peaks_nodup_uniq_vero_infectedAll_rev_peak_2153	SLC25A51	6.27	4.54388	2.12632	intron	vero
peaks_nodup_uniq_vero_infectedAll_rev_peak_2157	DCAF10	4.18	4.04699	1.68794	intron	vero
peaks_nodup_uniq_vero_infectedAll_rev_peak_2158	TRMT10B	12.54	6.15474	5.2468	tts	vero
peaks_nodup_uniq_vero_infectedAll_rev_peak_2159	ZBTB5	5.57	5.50081	3.51836	intron	vero
peaks_nodup_uniq_vero_infectedAll_rev_peak_2161	GRHPR	37.62	3.51102	6.69169	exon	vero
peaks_nodup_uniq_vero_infectedAll_rev_peak_2164	ZCCHC7	34.14	2.83369	4.03786	exon	vero
peaks_nodup_uniq_vero_infectedAll_rev_peak_2165	LOC103219868	10.45	5.72518	4.1955	intron	vero
peaks_nodup_uniq_vero_infectedAll_rev_peak_2169	CLTA	13.24	3.68837	2.28616	intron	vero
peaks_nodup_uniq_vero_infectedAll_rev_peak_2170	RECK	7.66	4.3318	1.72073	intron	vero
peaks_nodup_uniq_vero_infectedAll_rev_peak_2173	NPR2	6.97	4.42606	1.47717	intron	vero
peaks_nodup_uniq_vero_infectedAll_rev_peak_2176	NPR2	39.01	2.22304	2.41245	exon	vero
peaks_nodup_uniq_vero_infectedAll_rev_peak_2177	TLN1	27.17	3.1301	3.80568	intron	vero
peaks_nodup_uniq_vero_infectedAll_rev_peak_2178	TLN1	23.69	3.16506	3.06139	intron	vero
peaks_nodup_uniq_vero_infectedAll_rev_peak_2180	TESK1	18.11	3.4132	2.84878	tts	vero
peaks_nodup_uniq_vero_infectedAll_rev_peak_2181	RUSC2	18.11	2.73056	1.52598	intron	vero
peaks_nodup_uniq_vero_infectedAll_rev_peak_2183a	RUSC2	25.08	2.96373	3.07488	exon	vero
peaks_nodup_uniq_vero_infectedAll_rev_peak_2185	UNC13B	9.06	5.58721	4.06676	exon	vero
peaks_nodup_uniq_vero_infectedAll_rev_peak_2187	UNC13B	12.54	3.38511	1.55482	intron	vero
peaks_nodup_uniq_vero_infectedAll_rev_peak_2189	LOC103219255	8.36	5.20016	3.1523	intron	vero
peaks_nodup_uniq_vero_infectedAll_rev_peak_2193	AQP7	4.18	4.33481	2.28299	intron	vero
peaks_nodup_uniq_vero_infectedAll_rev_peak_2195	LOC103219284	16.72	3.54411	2.4688	exon	vero
peaks_nodup_uniq_vero_infectedAll_rev_peak_2197a	NFX1	34.83	3.44563	5.82332	exon	vero
peaks_nodup_uniq_vero_infectedAll_rev_peak_2198	DNAJA1	37.62	3.21844	5.71367	intron	vero
peaks_nodup_uniq_vero_infectedAll_rev_peak_2200	DDX58	9.75	5.37683	3.32156	intron	vero
peaks_nodup_uniq_vero_infectedAll_rev_peak_2205	LOC103219881	8.36	4.25467	1.99445	exon	vero
peaks_nodup_uniq_vero_infectedAll_rev_peak_2207	DENND4C	4.88	4.66415	1.81094	intron	vero
peaks_nodup_uniq_vero_infectedAll_rev_peak_2210	SH3GL2	44.59	2.27941	3.00429	exon	vero
peaks_nodup_uniq_vero_infectedAll_rev_peak_2211	SH3GL2	4.88	4.59127	1.68794	intron	vero
peaks_nodup_uniq_vero_infectedAll_rev_peak_2212	SH3GL2	8.36	4.68014	2.4688	intron	vero
peaks_nodup_uniq_vero_infectedAll_rev_peak_2218	LOC103219422	5.57	5.50081	3.51836	exon	vero
peaks_nodup_uniq_vero_infectedAll_rev_peak_2219	SNAPC3	6.97	5.31127	2.51415	intron	vero
peaks_nodup_uniq_vero_infectedAll_rev_peak_2224	LOC103219464	7.66	4.3318	1.72073	intron	vero
peaks_nodup_uniq_vero_infectedAll_rev_peak_2226	LOC103219464	7.66	4.81311	2.28299	intron	vero
peaks_nodup_uniq_vero_infectedAll_rev_peak_2228	LOC103219464	4.18	4.11122	1.81094	intron	vero
peaks_nodup_uniq_vero_infectedAll_rev_peak_2229	LOC103219889	7.66	4.3318	1.72073	intron	vero
peaks_nodup_uniq_vero_infectedAll_rev_peak_2230	KIAA1432	5.57	4.56495	1.86209	intergenic	vero
peaks_nodup_uniq_vero_infectedAll_rev_peak_2231	KIAA1432	19.51	5.12683	5.97558	exon	vero
peaks_nodup_uniq_vero_infectedAll_rev_peak_2234	LOC103219494	7.66	4.3318	1.72073	promoter-tss	vero
peaks_nodup_uniq_vero_infectedAll_rev_peak_2236	LOC103219494	4.18	4.04699	1.68794	intron	vero
peaks_nodup_uniq_vero_infectedAll_rev_peak_2237	LOC103219493	13.24	4.7457	3.80568	intron	vero
peaks_nodup_uniq_vero_infectedAll_rev_peak_2238	AK3	4.88	4.91781	2.28299	intergenic	vero
peaks_nodup_uniq_vero_infectedAll_rev_peak_2240	SLC1A1	17.42	3.68345	3.04065	intron	vero
peaks_nodup_uniq_vero_infectedAll_rev_peak_2242	SLC1A1	32.05	2.75398	3.5171	intron	vero
peaks_nodup_uniq_vero_infectedAll_rev_peak_2245	LOC103219522	6.27	4.54388	2.12632	exon	vero
peaks_nodup_uniq_vero_infectedAll_rev_peak_2246	LOC103219525	6.27	6.08381	4.82114	intron	vero
peaks_nodup_uniq_vero_infectedAll_rev_peak_2247	LOC103219525	12.54	6.77021	6.07627	intron	vero
peaks_nodup_uniq_vero_infectedAll_rev_peak_2248	SMARCA2	19.51	3.41789	2.9208	intron	vero
peaks_nodup_uniq_vero_infectedAll_rev_peak_2250	KANK1	32.74	2.59573	2.82391	exon	vero
peaks_nodup_uniq_vero_infectedAll_rev_peak_2251	KANK1	30.65	3.16544	4.28349	exon	vero
peaks_nodup_uniq_vero_infectedAll_rev_peak_2253	DOCK8	4.18	4.24602	2.10817	intron	vero
peaks_nodup_uniq_vero_infectedAll_rev_peak_2255	APBA1	24.38	3.62631	4.3924	exon	vero
peaks_nodup_uniq_vero_infectedAll_rev_peak_2256	PTAR1	12.54	3.98248	2.38601	intron	vero
peaks_nodup_uniq_vero_infectedAll_rev_peak_2257	LOC103219562	22.99	3.42725	3.35657	exon	vero
peaks_nodup_uniq_vero_infectedAll_rev_peak_2260	LOC103219564	32.05	4.23689	7.89438	exon	vero
peaks_nodup_uniq_vero_infectedAll_rev_peak_2261	LOC103219564	31.35	2.94101	3.86918	exon	vero
peaks_nodup_uniq_vero_infectedAll_rev_peak_2265	LOC103219564	6.27	5.26827	3.19373	intron	vero
peaks_nodup_uniq_vero_infectedAll_rev_peak_2268	TRPM3	59.22	2.40875	5.2993	intron	vero
peaks_nodup_uniq_vero_infectedAll_rev_peak_2271	TMEM2	4.18	4.31678	2.25618	intron	vero
peaks_nodup_uniq_vero_infectedAll_rev_peak_2273	ABHD17B	6.97	4.42606	1.47717	intron	vero
peaks_nodup_uniq_vero_infectedAll_rev_peak_2275	TRPM6	4.88	4.81707	2.10817	exon	vero
peaks_nodup_uniq_vero_infectedAll_rev_peak_2277	TRPM6	4.18	4.31678	2.25618	exon	vero
peaks_nodup_uniq_vero_infectedAll_rev_peak_2279	LOC103219599	6.27	5.19301	3.06313	intergenic	vero
peaks_nodup_uniq_vero_infectedAll_rev_peak_2280	LOC103219610	4.18	4.31678	2.25618	promoter-tss	vero
peaks_nodup_uniq_vero_infectedAll_rev_peak_2282	LOC103219613	27.87	3.20751	3.80568	exon	vero
peaks_nodup_uniq_vero_infectedAll_rev_peak_2284	PRUNE2	7.66	5.3479	2.95969	intron	vero
peaks_nodup_uniq_vero_infectedAll_rev_peak_2287	LOC103219623	8.36	4.68014	2.4688	intron	vero
peaks_nodup_uniq_vero_infectedAll_rev_peak_2296	IDNK	21.6	3.76623	3.97699	intergenic	vero
peaks_nodup_uniq_vero_infectedAll_rev_peak_2299	GKAP1	9.06	4.0882	2.13266	intron	vero
peaks_nodup_uniq_vero_infectedAll_rev_peak_2305	LOC103219679	6.97	6.42492	4.31085	intron	vero
peaks_nodup_uniq_vero_infectedAll_rev_peak_2308	LOC103219681	50.16	3.19761	8.12213	exon	vero
peaks_nodup_uniq_vero_infectedAll_rev_peak_2309	ZCCHC6	36.92	3.21395	5.41963	exon	vero
peaks_nodup_uniq_vero_infectedAll_rev_peak_2310	ZCCHC6	25.08	4.34681	6.32583	intron	vero
peaks_nodup_uniq_vero_infectedAll_rev_peak_2311a	ZCCHC6	34.14	2.34252	2.3504	exon	vero
peaks_nodup_uniq_vero_infectedAll_rev_peak_2311b	ZCCHC6	34.83	2.98621	4.3594	exon	vero
peaks_nodup_uniq_vero_infectedAll_rev_peak_2312a	GAS1	62.01	2.86388	8.43543	exon	vero
peaks_nodup_uniq_vero_infectedAll_rev_peak_2313a	GAS1	56.43	3.1213	8.74751	promoter-tss	vero
peaks_nodup_uniq_vero_infectedAll_rev_peak_2313b	GAS1	43.19	2.10451	2.24871	promoter-tss	vero
peaks_nodup_uniq_vero_infectedAll_rev_peak_2314	LOC103219693	10.45	7.15647	6.12635	intron	vero
peaks_nodup_uniq_vero_infectedAll_rev_peak_2317	DAPK1	4.88	4.81707	2.10817	intron	vero
peaks_nodup_uniq_vero_infectedAll_rev_peak_2318	CTSL	10.45	3.81678	1.79641	intergenic	vero
peaks_nodup_uniq_vero_infectedAll_rev_peak_2319	SPIN1	6.97	5.69064	3.06313	promoter-tss	vero
peaks_nodup_uniq_vero_infectedAll_rev_peak_2320	LOC103219903	4.18	4.33481	2.28299	intergenic	vero
peaks_nodup_uniq_vero_infectedAll_rev_peak_2321	LOC103219724	8.36	4.25467	1.99445	intron	vero
peaks_nodup_uniq_vero_infectedAll_rev_peak_2322	SHC3	4.18	4.33481	2.28299	intron	vero
peaks_nodup_uniq_vero_infectedAll_rev_peak_2325	CKS2	13.24	3.55928	2.11967	intergenic	vero
peaks_nodup_uniq_vero_infectedAll_rev_peak_2326	CKS2	4.18	4.11122	1.81094	intergenic	vero
peaks_nodup_uniq_vero_infectedAll_rev_peak_2328	LOC103219727	25.78	3.0429	3.07488	intergenic	vero
peaks_nodup_uniq_vero_infectedAll_rev_peak_2329a	LOC103219727	35.53	2.43541	2.68332	intergenic	vero
peaks_nodup_uniq_vero_infectedAll_rev_peak_2329b	LOC103219727	39.71	2.99348	5.22558	intergenic	vero
peaks_nodup_uniq_vero_infectedAll_rev_peak_2330	LOC103219727	33.44	2.29608	2.04242	exon	vero
peaks_nodup_uniq_vero_infectedAll_rev_peak_2332	LOC103219727	12.54	3.38511	1.55482	intron	vero
peaks_nodup_uniq_vero_infectedAll_rev_peak_2333a	LOC103219727	18.11	4.55094	4.87071	intergenic	vero
peaks_nodup_uniq_vero_infectedAll_rev_peak_2333b	LOC103219727	18.11	2.73056	1.52598	intergenic	vero
peaks_nodup_uniq_vero_infectedAll_rev_peak_2336	AUH	13.93	4.97793	3.80568	intron	vero
peaks_nodup_uniq_vero_infectedAll_rev_peak_2337	AUH	13.24	3.55928	2.11967	intron	vero
peaks_nodup_uniq_vero_infectedAll_rev_peak_2339	AUH	32.74	2.81204	3.5171	intron	vero
peaks_nodup_uniq_vero_infectedAll_rev_peak_2341	LOC103219741	31.35	3.3699	5.14092	exon	vero
peaks_nodup_uniq_vero_infectedAll_rev_peak_2342	LOC103219745	36.23	6.20465	14.0617	intron	vero
peaks_nodup_uniq_vero_infectedAll_rev_peak_2343a	LOC103219745	17.42	4.60431	4.57711	intron	vero
peaks_nodup_uniq_vero_infectedAll_rev_peak_2343b	LOC103219745	17.42	3.54178	2.78365	intron	vero
peaks_nodup_uniq_vero_infectedAll_rev_peak_2344	LOC103219745	39.71	3.70103	7.7297	intron	vero
peaks_nodup_uniq_vero_infectedAll_rev_peak_2350	LOC103219908	34.83	2.23966	1.84628	intergenic	vero
peaks_nodup_uniq_vero_infectedAll_rev_peak_2351	LOC103219909	6.27	4.08439	1.52598	intron	vero
peaks_nodup_uniq_vero_infectedAll_rev_peak_2352	IARS	8.36	5.25859	3.23734	intron	vero
peaks_nodup_uniq_vero_infectedAll_rev_peak_2355	LOC103219759	4.88	4.91781	2.28299	intergenic	vero
peaks_nodup_uniq_vero_infectedAll_rev_peak_2356	BICD2	20.9	2.73759	1.59452	exon	vero
peaks_nodup_uniq_vero_infectedAll_rev_peak_2357	BICD2	22.99	5.99769	8.19476	intron	vero
peaks_nodup_uniq_vero_infectedAll_rev_peak_2358	LOC103219771	17.42	4.60431	4.57711	intergenic	vero
peaks_nodup_uniq_vero_infectedAll_rev_peak_2361	ZNF169	4.88	4.91781	2.28299	intergenic	vero
peaks_nodup_uniq_vero_infectedAll_rev_peak_2362	LOC103219793	50.86	3.05049	7.25	promoter-tss	vero
peaks_nodup_uniq_vero_infectedAll_rev_peak_2363	LOC103219793	47.37	1.935	1.72073	intergenic	vero
peaks_nodup_uniq_vero_infectedAll_rev_peak_2364	LOC103219793	43.19	2.90755	5.66672	intergenic	vero
peaks_nodup_uniq_vero_infectedAll_rev_peak_2365	LOC103219793	49.47	3.36433	8.58518	intron	vero
peaks_nodup_uniq_vero_infectedAll_rev_peak_2366	LOC103219792	16.72	3.39474	2.25618	intron	vero
peaks_nodup_uniq_vero_infectedAll_rev_peak_2368a	LOC103219915	28.56	2.95643	3.38629	exon	vero
peaks_nodup_uniq_vero_infectedAll_rev_peak_2369	ZNF367	5.57	4.83347	2.26062	intergenic	vero
peaks_nodup_uniq_vero_infectedAll_rev_peak_2371	LOC103219920	9.06	5.02849	3.32156	intergenic	vero
peaks_nodup_uniq_vero_infectedAll_rev_peak_2372	LOC103219920	9.75	7.68119	6.48584	intergenic	vero
peaks_nodup_uniq_vero_infectedAll_rev_peak_2373a	LOC103219920	19.51	6.03157	7.42115	intergenic	vero
peaks_nodup_uniq_vero_infectedAll_rev_peak_2373b	LOC103219920	23.69	6.17187	8.99835	intergenic	vero
peaks_nodup_uniq_vero_infectedAll_rev_peak_2374a	LOC103219920	39.71	6.78522	16.4053	exon	vero
peaks_nodup_uniq_vero_infectedAll_rev_peak_2374b	LOC103219920	16.02	3.40477	2.4688	exon	vero
peaks_nodup_uniq_vero_infectedAll_rev_peak_2374c	LOC103219920	16.72	7.38357	8.16725	exon	vero
peaks_nodup_uniq_vero_infectedAll_rev_peak_2375	LOC103219920	20.2	2.6505	1.59452	exon	vero
peaks_nodup_uniq_vero_infectedAll_rev_peak_2376b	LOC103219920	22.99	2.66564	1.68794	exon	vero
peaks_nodup_uniq_vero_infectedAll_rev_peak_2379	PTCH1	4.18	4.17753	1.9585	promoter-tss	vero
peaks_nodup_uniq_vero_infectedAll_rev_peak_2381	LOC103219830	13.93	4.10269	2.61025	intron	vero
peaks_nodup_uniq_vero_infectedAll_rev_peak_2382	LOC103219830	50.86	4.32153	12.6095	intron	vero
peaks_nodup_uniq_vero_infectedAll_rev_peak_2383	LOC103219830	22.29	4.47963	5.74183	intron	vero
peaks_nodup_uniq_vero_infectedAll_rev_peak_2384	C12H9orf3	13.93	6.85037	6.23961	intron	vero
peaks_nodup_uniq_vero_infectedAll_rev_peak_2387a	C12H9orf3	31.35	3.23511	4.77156	exon	vero
peaks_nodup_uniq_vero_infectedAll_rev_peak_2392	TRNAF-GAA	59.92	2.43661	5.2993	exon	vero
peaks_nodup_uniq_vero_infectedAll_rev_peak_2393	TRNAF-GAA	13.93	4.91244	3.72622	intron	vero
peaks_nodup_uniq_vero_infectedAll_rev_peak_2395	PHIP	24.38	4.70077	6.69187	intron	vero
peaks_nodup_uniq_vero_infectedAll_rev_peak_2397	LCA5	27.17	5.63418	9.59558	exon	vero
peaks_nodup_uniq_vero_infectedAll_rev_peak_2398	LCA5	26.47	3.92489	5.4825	exon	vero
peaks_nodup_uniq_vero_infectedAll_rev_peak_2399a	IBTK	22.99	2.66564	1.68794	exon	vero
peaks_nodup_uniq_vero_infectedAll_rev_peak_2399b	IBTK	16.02	2.74579	1.3062	exon	vero
peaks_nodup_uniq_vero_infectedAll_rev_peak_2400	LOC103240002	4.18	4.31678	2.25618	intergenic	vero
peaks_nodup_uniq_vero_infectedAll_rev_peak_2403	LOC103240003	4.18	4.33481	2.28299	intergenic	vero
peaks_nodup_uniq_vero_infectedAll_rev_peak_2406	LOC103240003	7.66	6.18828	4.15648	intergenic	vero
peaks_nodup_uniq_vero_infectedAll_rev_peak_2408	LOC103240003	13.24	3.55928	2.11967	intergenic	vero
peaks_nodup_uniq_vero_infectedAll_rev_peak_2409	LOC103240003	8.36	4.25467	1.99445	intergenic	vero
peaks_nodup_uniq_vero_infectedAll_rev_peak_2411	LOC103240009	15.33	4.80211	4.37909	intergenic	vero
peaks_nodup_uniq_vero_infectedAll_rev_peak_2413	LOC103240014	4.88	4.89736	2.25618	intergenic	vero
peaks_nodup_uniq_vero_infectedAll_rev_peak_2416	LOC103240015	4.18	4.11122	1.81094	intron	vero
peaks_nodup_uniq_vero_infectedAll_rev_peak_2417	LOC103240015	6.97	6.63908	4.77562	intron	vero
peaks_nodup_uniq_vero_infectedAll_rev_peak_2421	MRAP2	16.02	5.00702	5.10709	intron	vero
peaks_nodup_uniq_vero_infectedAll_rev_peak_2422	CEP162	9.06	4.57135	2.72385	intron	vero
peaks_nodup_uniq_vero_infectedAll_rev_peak_2423a	CEP162	25.08	2.89787	2.91122	exon	vero
peaks_nodup_uniq_vero_infectedAll_rev_peak_2427	TBX18	9.75	8.99881	9.1129	intergenic	vero
peaks_nodup_uniq_vero_infectedAll_rev_peak_2429	TBX18	21.6	3.2282	2.87503	promoter-tss	vero
peaks_nodup_uniq_vero_infectedAll_rev_peak_2431	SYNCRIP	67.58	2.28596	5.29919	promoter-tss	vero
peaks_nodup_uniq_vero_infectedAll_rev_peak_2433	LOC103240071	9.06	7.18355	6.48584	intron	vero
peaks_nodup_uniq_vero_infectedAll_rev_peak_2434	LOC103240076	23.69	4.93749	6.75144	exon	vero
peaks_nodup_uniq_vero_infectedAll_rev_peak_2438	RNGTT	5.57	4.16046	1.30581	intron	vero
peaks_nodup_uniq_vero_infectedAll_rev_peak_2442	LOC103240092	4.88	4.89736	2.25618	intergenic	vero
peaks_nodup_uniq_vero_infectedAll_rev_peak_2445	PNRC1	30.65	3.51715	5.26218	tts	vero
peaks_nodup_uniq_vero_infectedAll_rev_peak_2446	UBE2J1	10.45	7.15647	6.12635	exon	vero
peaks_nodup_uniq_vero_infectedAll_rev_peak_2447b	LOC103240106	14.63	3.25635	1.69655	tts	vero
peaks_nodup_uniq_vero_infectedAll_rev_peak_2448	LYRM2	36.23	4.13643	8.56571	intron	vero
peaks_nodup_uniq_vero_infectedAll_rev_peak_2449	LYRM2	42.5	7.49967	19.3681	intron	vero
peaks_nodup_uniq_vero_infectedAll_rev_peak_2451	LOC103240105	4.18	3.92435	1.46793	intron	vero
peaks_nodup_uniq_vero_infectedAll_rev_peak_2454	MAP3K7	9.06	5.02849	3.32156	exon	vero
peaks_nodup_uniq_vero_infectedAll_rev_peak_2455	LOC103240120	64.79	2.05601	3.50627	exon	vero
peaks_nodup_uniq_vero_infectedAll_rev_peak_2456	LOC103240120	29.26	3.0261	3.82294	intron	vero
peaks_nodup_uniq_vero_infectedAll_rev_peak_2458	LOC103240123	4.18	4.33481	2.28299	intergenic	vero
peaks_nodup_uniq_vero_infectedAll_rev_peak_2459	LOC103240123	4.88	4.91781	2.28299	intergenic	vero
peaks_nodup_uniq_vero_infectedAll_rev_peak_2460	FUT9	4.18	4.33481	2.28299	intergenic	vero
peaks_nodup_uniq_vero_infectedAll_rev_peak_2461	LOC103240142	7.66	7.21966	6.12298	tts	vero
peaks_nodup_uniq_vero_infectedAll_rev_peak_2462	TAB2	33.44	2.26586	1.93551	exon	vero
peaks_nodup_uniq_vero_infectedAll_rev_peak_2463	TAB2	50.16	2.69272	5.73314	exon	vero
peaks_nodup_uniq_vero_infectedAll_rev_peak_2464	TAB2	16.02	2.83731	1.48745	intron	vero
peaks_nodup_uniq_vero_infectedAll_rev_peak_2465	TAB2	7.66	4.3318	1.72073	exon	vero
peaks_nodup_uniq_vero_infectedAll_rev_peak_2466	LOC103240160	29.96	3.09577	3.82294	exon	vero
peaks_nodup_uniq_vero_infectedAll_rev_peak_2468	LOC103240170	4.88	4.91781	2.28299	intron	vero
peaks_nodup_uniq_vero_infectedAll_rev_peak_2469b	LOC103240192	13.24	3.55928	2.11967	exon	vero
peaks_nodup_uniq_vero_infectedAll_rev_peak_2471	LOC103240193	6.97	6.03553	3.59644	intron	vero
peaks_nodup_uniq_vero_infectedAll_rev_peak_2473	STXBP5	27.17	2.34758	1.65051	promoter-tss	vero
peaks_nodup_uniq_vero_infectedAll_rev_peak_2474	UTRN	17.42	3.68345	3.04065	intron	vero
peaks_nodup_uniq_vero_infectedAll_rev_peak_2477	UTRN	7.66	4.3318	1.72073	intron	vero
peaks_nodup_uniq_vero_infectedAll_rev_peak_2478	UTRN	17.42	3.68345	3.04065	intron	vero
peaks_nodup_uniq_vero_infectedAll_rev_peak_2480	UTRN	9.06	4.0882	2.13266	intron	vero
peaks_nodup_uniq_vero_infectedAll_rev_peak_2481	UTRN	8.36	6.68592	5.28496	intron	vero
peaks_nodup_uniq_vero_infectedAll_rev_peak_2484b	ZC2HC1B	32.74	3.51505	5.64958	promoter-tss	vero
peaks_nodup_uniq_vero_infectedAll_rev_peak_2486	LOC103240250	4.88	4.91781	2.28299	intron	vero
peaks_nodup_uniq_vero_infectedAll_rev_peak_2489	LOC103240258	5.57	4.69537	2.06426	intron	vero
peaks_nodup_uniq_vero_infectedAll_rev_peak_2490	AIG1	22.99	5.99769	8.19476	tts	vero
peaks_nodup_uniq_vero_infectedAll_rev_peak_2498	CITED2	11.84	3.77757	1.79574	exon	vero
peaks_nodup_uniq_vero_infectedAll_rev_peak_2503	PERP	5.57	5.50081	3.51836	exon	vero
peaks_nodup_uniq_vero_infectedAll_rev_peak_2504a	TNFAIP3	13.24	3.55928	2.11967	exon	vero
peaks_nodup_uniq_vero_infectedAll_rev_peak_2504b	TNFAIP3	18.11	3.82279	3.59644	exon	vero
peaks_nodup_uniq_vero_infectedAll_rev_peak_2505	TNFAIP3	14.63	3.1261	1.48745	exon	vero
peaks_nodup_uniq_vero_infectedAll_rev_peak_2511	TBPL1	13.24	4.7457	3.80568	exon	vero
peaks_nodup_uniq_vero_infectedAll_rev_peak_2512b	LOC103240991	8.36	4.68014	2.4688	exon	vero
peaks_nodup_uniq_vero_infectedAll_rev_peak_2515	EYA4	4.18	3.86578	1.35413	intron	vero
peaks_nodup_uniq_vero_infectedAll_rev_peak_2523	LOC103240377	10.45	4.77098	2.99547	exon	vero
peaks_nodup_uniq_vero_infectedAll_rev_peak_2533	LOC103240411	28.56	4.10615	6.36618	exon	vero
peaks_nodup_uniq_vero_infectedAll_rev_peak_2534	LOC103240411	45.98	4.27105	11.0711	intron	vero
peaks_nodup_uniq_vero_infectedAll_rev_peak_2536	HINT3	7.66	5.41474	3.04391	intron	vero
peaks_nodup_uniq_vero_infectedAll_rev_peak_2537	HINT3	6.97	4.97931	2.12632	intron	vero
peaks_nodup_uniq_vero_infectedAll_rev_peak_2539	NCOA7	21.6	4.51948	5.42236	intron	vero
peaks_nodup_uniq_vero_infectedAll_rev_peak_2540	NCOA7	20.9	5.47518	6.68741	intron	vero
peaks_nodup_uniq_vero_infectedAll_rev_peak_2541a	NCOA7	34.83	2.7565	3.59644	exon	vero
peaks_nodup_uniq_vero_infectedAll_rev_peak_2541b	NCOA7	24.38	3.34002	3.73999	exon	vero
peaks_nodup_uniq_vero_infectedAll_rev_peak_2543	TPD52L1	10.45	6.36131	5.03808	intron	vero
peaks_nodup_uniq_vero_infectedAll_rev_peak_2548	RNF217	48.77	2.2622	3.27992	exon	vero
peaks_nodup_uniq_vero_infectedAll_rev_peak_2550	LOC103240443	6.27	4.03901	1.47717	exon	vero
peaks_nodup_uniq_vero_infectedAll_rev_peak_2552	LOC103240430	5.57	5.50081	3.51836	intron	vero
peaks_nodup_uniq_vero_infectedAll_rev_peak_2553	LOC103240430	4.88	4.91781	2.28299	intron	vero
peaks_nodup_uniq_vero_infectedAll_rev_peak_2554	LOC103240430	4.18	4.33481	2.28299	intron	vero
peaks_nodup_uniq_vero_infectedAll_rev_peak_2557	NKAIN2	5.57	4.69537	2.06426	intron	vero
peaks_nodup_uniq_vero_infectedAll_rev_peak_2558	NKAIN2	13.24	4.7457	3.80568	intron	vero
peaks_nodup_uniq_vero_infectedAll_rev_peak_2559	NKAIN2	33.44	11.4804	22.4385	intron	vero
peaks_nodup_uniq_vero_infectedAll_rev_peak_2561	HSF2	9.06	5.02849	3.32156	intron	vero
peaks_nodup_uniq_vero_infectedAll_rev_peak_2563	GJA1	21.6	3.76623	3.97699	exon	vero
peaks_nodup_uniq_vero_infectedAll_rev_peak_2564	GJA1	27.17	4.02442	6.07627	exon	vero
peaks_nodup_uniq_vero_infectedAll_rev_peak_2565	ASF1A	16.02	3.40477	2.4688	exon	vero
peaks_nodup_uniq_vero_infectedAll_rev_peak_2566	ASF1A	4.18	3.98472	1.56304	intron	vero
peaks_nodup_uniq_vero_infectedAll_rev_peak_2568	NUS1	9.06	3.83854	1.8127	intron	vero
peaks_nodup_uniq_vero_infectedAll_rev_peak_2569	NUS1	27.17	3.80688	5.53488	promoter-tss	vero
peaks_nodup_uniq_vero_infectedAll_rev_peak_2571	GOPC	24.38	2.53842	1.78849	exon	vero
peaks_nodup_uniq_vero_infectedAll_rev_peak_2572	FAM162B	22.99	4.79815	6.09112	exon	vero
peaks_nodup_uniq_vero_infectedAll_rev_peak_2573	LOC103240511	15.33	4.0818	3.29483	exon	vero
peaks_nodup_uniq_vero_infectedAll_rev_peak_2576	LOC103240513	5.57	4.69537	2.06426	tts	vero
peaks_nodup_uniq_vero_infectedAll_rev_peak_2578	LOC103240529	5.57	5.47793	3.46282	intergenic	vero
peaks_nodup_uniq_vero_infectedAll_rev_peak_2579a	MARCKS	50.16	2.43627	4.47371	exon	vero
peaks_nodup_uniq_vero_infectedAll_rev_peak_2579b	MARCKS	52.95	2.72467	5.97696	exon	vero
peaks_nodup_uniq_vero_infectedAll_rev_peak_2582	FAM229B	14.63	7.10477	7.115	intergenic	vero
peaks_nodup_uniq_vero_infectedAll_rev_peak_2586	KIAA1919	59.22	3.01093	8.73545	exon	vero
peaks_nodup_uniq_vero_infectedAll_rev_peak_2587	LOC103240568	20.2	3.02914	2.40412	intergenic	vero
peaks_nodup_uniq_vero_infectedAll_rev_peak_2589	LOC103241018	16.72	2.95343	1.48745	intergenic	vero
peaks_nodup_uniq_vero_infectedAll_rev_peak_2590a	LOC103241018	19.51	3.41789	2.9208	intergenic	vero
peaks_nodup_uniq_vero_infectedAll_rev_peak_2590b	LOC103241018	20.2	4.2408	4.80775	intergenic	vero
peaks_nodup_uniq_vero_infectedAll_rev_peak_2590c	LOC103241018	16.02	2.93515	1.6713	intergenic	vero
peaks_nodup_uniq_vero_infectedAll_rev_peak_2591	LOC103241018	27.17	3.52136	4.82114	intergenic	vero
peaks_nodup_uniq_vero_infectedAll_rev_peak_2592a	LOC103241018	19.51	2.92962	1.97494	intergenic	vero
peaks_nodup_uniq_vero_infectedAll_rev_peak_2592b	LOC103241018	19.51	2.92962	1.97494	intergenic	vero
peaks_nodup_uniq_vero_infectedAll_rev_peak_2593a	LOC103241018	26.47	2.49766	1.89264	intergenic	vero
peaks_nodup_uniq_vero_infectedAll_rev_peak_2593b	LOC103241018	25.08	4.34681	6.32583	intergenic	vero
peaks_nodup_uniq_vero_infectedAll_rev_peak_2593c	LOC103241018	24.38	5.07683	7.44359	intergenic	vero
peaks_nodup_uniq_vero_infectedAll_rev_peak_2595	LOC103241018	38.32	2.28593	2.47291	exon	vero
peaks_nodup_uniq_vero_infectedAll_rev_peak_2596	FIG4	13.24	7.11856	7.04968	intron	vero
peaks_nodup_uniq_vero_infectedAll_rev_peak_2598	FIG4	4.18	3.92435	1.46793	intron	vero
peaks_nodup_uniq_vero_infectedAll_rev_peak_2600	LOC103240602	17.42	3.06954	1.9585	exon	vero
peaks_nodup_uniq_vero_infectedAll_rev_peak_2602	CEP57L1	9.75	5.37683	3.32156	intron	vero
peaks_nodup_uniq_vero_infectedAll_rev_peak_2603	LOC103240608	29.26	10.087	18.2778	intron	vero
peaks_nodup_uniq_vero_infectedAll_rev_peak_2609	ARMC2	25.78	8.92585	14.248	intron	vero
peaks_nodup_uniq_vero_infectedAll_rev_peak_2611	LOC103240620	42.5	3.10701	6.2091	intron	vero
peaks_nodup_uniq_vero_infectedAll_rev_peak_2612	FOXO3	20.2	4.07769	4.50693	intron	vero
peaks_nodup_uniq_vero_infectedAll_rev_peak_2614	FOXO3	10.45	5.72518	4.1955	intergenic	vero
peaks_nodup_uniq_vero_infectedAll_rev_peak_2615	LOC103240617	6.27	4.54388	2.12632	intron	vero
peaks_nodup_uniq_vero_infectedAll_rev_peak_2617	LOC103240616	7.66	5.41474	3.04391	intron	vero
peaks_nodup_uniq_vero_infectedAll_rev_peak_2618	SCML4	14.63	4.5972	3.68567	exon	vero
peaks_nodup_uniq_vero_infectedAll_rev_peak_2619	LOC103240633	23.69	4.11458	5.11591	exon	vero
peaks_nodup_uniq_vero_infectedAll_rev_peak_2621	SOBP	11.84	3.5677	1.51325	promoter-tss	vero
peaks_nodup_uniq_vero_infectedAll_rev_peak_2622	C13H6orf203	34.83	2.55961	2.93802	exon	vero
peaks_nodup_uniq_vero_infectedAll_rev_peak_2623	C13H6orf203	14.63	3.1261	1.48745	exon	vero
peaks_nodup_uniq_vero_infectedAll_rev_peak_2625	RTN4IP1	9.75	5.37683	3.32156	intron	vero
peaks_nodup_uniq_vero_infectedAll_rev_peak_2627	AIM1	39.01	2.50092	3.51836	exon	vero
peaks_nodup_uniq_vero_infectedAll_rev_peak_2632	LOC103240670	9.06	7.39483	6.8746	tts	vero
peaks_nodup_uniq_vero_infectedAll_rev_peak_2633	LOC103240670	7.66	4.3318	1.72073	intron	vero
peaks_nodup_uniq_vero_infectedAll_rev_peak_2634	LOC103240670	6.97	5.69064	3.06313	intron	vero
peaks_nodup_uniq_vero_infectedAll_rev_peak_2636	LOC103240671	6.27	5.19301	3.06313	intron	vero
peaks_nodup_uniq_vero_infectedAll_rev_peak_2637	LOC103240671	6.27	5.95919	4.53734	intron	vero
peaks_nodup_uniq_vero_infectedAll_rev_peak_2640	GRIK2	7.66	4.3318	1.72073	intron	vero
peaks_nodup_uniq_vero_infectedAll_rev_peak_2642	UFL1	23.69	7.71483	11.5027	intron	vero
peaks_nodup_uniq_vero_infectedAll_rev_peak_2643	AKAP12	6.27	4.78303	2.42935	exon	vero
peaks_nodup_uniq_vero_infectedAll_rev_peak_2644b	ZBTB2	25.78	6.69438	10.5911	exon	vero
peaks_nodup_uniq_vero_infectedAll_rev_peak_2649	LOC103240739	35.53	2.94606	4.47303	tts	vero
peaks_nodup_uniq_vero_infectedAll_rev_peak_2650	LOC103240739	6.27	4.37965	1.91345	intron	vero
peaks_nodup_uniq_vero_infectedAll_rev_peak_2651	SYNE1	21.6	2.82467	2.02241	intron	vero
peaks_nodup_uniq_vero_infectedAll_rev_peak_2652a	FBXO5	13.93	4.66681	3.38713	exon	vero
peaks_nodup_uniq_vero_infectedAll_rev_peak_2652b	FBXO5	14.63	5.21016	4.54808	exon	vero
peaks_nodup_uniq_vero_infectedAll_rev_peak_2654	CNKSR3	7.66	4.3318	1.72073	intron	vero
peaks_nodup_uniq_vero_infectedAll_rev_peak_2655	CNKSR3	16.02	5.67462	6.10595	exon	vero
peaks_nodup_uniq_vero_infectedAll_rev_peak_2656	LOC103240761	23.69	4.93749	6.75144	tts	vero
peaks_nodup_uniq_vero_infectedAll_rev_peak_2665	LOC103240995	4.18	4.31678	2.25618	intron	vero
peaks_nodup_uniq_vero_infectedAll_rev_peak_2667a	LOC103240995	24.38	5.51829	8.28235	intron	vero
peaks_nodup_uniq_vero_infectedAll_rev_peak_2667b	LOC103240995	16.02	2.83731	1.48745	intron	vero
peaks_nodup_uniq_vero_infectedAll_rev_peak_2669	LOC103240801	13.93	7.4669	7.04968	intron	vero
peaks_nodup_uniq_vero_infectedAll_rev_peak_2671	RSPH3	27.17	4.69515	7.6187	exon	vero
peaks_nodup_uniq_vero_infectedAll_rev_peak_2674	RSPH3	14.63	6.51271	6.31286	intron	vero
peaks_nodup_uniq_vero_infectedAll_rev_peak_2682	LOC103240861	4.88	4.91781	2.28299	intron	vero
peaks_nodup_uniq_vero_infectedAll_rev_peak_2683	LOC103240855	4.18	4.33481	2.28299	intron	vero
peaks_nodup_uniq_vero_infectedAll_rev_peak_2690	LOC103240903	12.54	4.51347	3.09663	intron	vero
peaks_nodup_uniq_vero_infectedAll_rev_peak_2691	LOC103240903	9.06	3.78082	1.7407	intron	vero
peaks_nodup_uniq_vero_infectedAll_rev_peak_2692a	LOC103240903	11.84	4.28124	2.41245	intron	vero
peaks_nodup_uniq_vero_infectedAll_rev_peak_2694	FGFR1OP	6.97	4.97931	2.12632	promoter-tss	vero
peaks_nodup_uniq_vero_infectedAll_rev_peak_2695	LOC103240942	4.18	4.33481	2.28299	intron	vero
peaks_nodup_uniq_vero_infectedAll_rev_peak_2696	KIF25	6.27	6.05851	4.77562	intron	vero
peaks_nodup_uniq_vero_infectedAll_rev_peak_2703	LOC103240965	11.15	3.79595	2.10817	intergenic	vero
peaks_nodup_uniq_vero_infectedAll_rev_peak_2708	LOC103240965	16.02	5.67462	6.10595	intergenic	vero
peaks_nodup_uniq_vero_infectedAll_rev_peak_2709	LOC103240965	12.54	3.56327	1.81317	intergenic	vero
peaks_nodup_uniq_vero_infectedAll_rev_peak_2710	THBS2	4.18	4.33481	2.28299	intron	vero
peaks_nodup_uniq_vero_infectedAll_rev_peak_2717	LOC103240996	6.27	4.9796	2.72385	intron	vero
peaks_nodup_uniq_vero_infectedAll_rev_peak_2718	LOC103240996	10.45	5.72518	4.1955	intron	vero
peaks_nodup_uniq_vero_infectedAll_rev_peak_2719	LOC103240968	7.66	4.3318	1.72073	intron	vero
peaks_nodup_uniq_vero_infectedAll_rev_peak_2720a	LOC103240968	27.87	4.81127	7.6187	intron	vero
peaks_nodup_uniq_vero_infectedAll_rev_peak_2720b	LOC103240968	22.99	3.33205	3.16006	intron	vero
peaks_nodup_uniq_vero_infectedAll_rev_peak_2720c	LOC103240968	33.44	4.30514	8.19476	intron	vero
peaks_nodup_uniq_vero_infectedAll_rev_peak_2721	PHF10	13.24	3.55928	2.11967	promoter-tss	vero
peaks_nodup_uniq_vero_infectedAll_rev_peak_2722	PHF10	8.36	5.85018	4.01918	intergenic	vero
peaks_nodup_uniq_vero_infectedAll_rev_peak_2723	LOC103240975	13.24	5.47581	4.81816	intergenic	vero
peaks_nodup_uniq_vero_infectedAll_rev_peak_2725a	LOC103240977	20.2	4.2408	4.80775	intron	vero
peaks_nodup_uniq_vero_infectedAll_rev_peak_2726	PDCD2	32.05	8.26194	16.7393	intergenic	vero
peaks_nodup_uniq_vero_infectedAll_rev_peak_2727	LOC103240982	28.56	6.42702	11.352	intergenic	vero
peaks_nodup_uniq_vero_infectedAll_rev_peak_2728a	LOC103240982	20.9	3.12867	2.40412	intergenic	vero
peaks_nodup_uniq_vero_infectedAll_rev_peak_2728b	LOC103240982	16.02	3.86906	3.29483	intergenic	vero
peaks_nodup_uniq_vero_infectedAll_rev_peak_2729	LOC103240982	10.45	5.72518	4.1955	intergenic	vero
peaks_nodup_uniq_vero_infectedAll_rev_peak_2732	LOC103240982	19.51	2.92962	1.97494	intergenic	vero
peaks_nodup_uniq_vero_infectedAll_rev_peak_2733	LOC103240982	9.75	4.30147	2.06322	intergenic	vero
peaks_nodup_uniq_vero_infectedAll_rev_peak_2734	FAM120B	22.99	3.99846	4.54808	intron	vero
peaks_nodup_uniq_vero_infectedAll_rev_peak_2735a	MRPS5	10.45	4.08941	2.1463	intergenic	vero
peaks_nodup_uniq_vero_infectedAll_rev_peak_2738	ZNF514	13.24	11.8643	15.3121	promoter-tss	vero
peaks_nodup_uniq_vero_infectedAll_rev_peak_2746	STARD7	37.62	2.27184	2.28299	exon	vero
peaks_nodup_uniq_vero_infectedAll_rev_peak_2748a	TMEM127	37.62	2.75866	4.0832	exon	vero
peaks_nodup_uniq_vero_infectedAll_rev_peak_2749	TMEM127	36.23	2.32674	2.4641	exon	vero
peaks_nodup_uniq_vero_infectedAll_rev_peak_2750	FER1L5	22.99	5.99769	8.19476	intron	vero
peaks_nodup_uniq_vero_infectedAll_rev_peak_2751	FER1L5	13.24	3.55928	2.11967	intron	vero
peaks_nodup_uniq_vero_infectedAll_rev_peak_2752a	FER1L5	11.84	4.58705	2.80892	intron	vero
peaks_nodup_uniq_vero_infectedAll_rev_peak_2752b	FER1L5	12.54	4.23138	2.71667	intron	vero
peaks_nodup_uniq_vero_infectedAll_rev_peak_2755	LMAN2L	30.65	3.51715	5.26218	exon	vero
peaks_nodup_uniq_vero_infectedAll_rev_peak_2760	ZAP70	14.63	4.5972	3.68567	intron	vero
peaks_nodup_uniq_vero_infectedAll_rev_peak_2762	TMEM131	4.88	4.73938	1.9585	intron	vero
peaks_nodup_uniq_vero_infectedAll_rev_peak_2766	LOC103241099	36.23	2.48186	3.04782	intron	vero
peaks_nodup_uniq_vero_infectedAll_rev_peak_2767	MGAT4A	14.63	6.01173	5.64436	exon	vero
peaks_nodup_uniq_vero_infectedAll_rev_peak_2769	KIAA1211L	18.11	6.37131	7.76925	exon	vero
peaks_nodup_uniq_vero_infectedAll_rev_peak_2770	KIAA1211L	4.88	4.52064	1.56304	exon	vero
peaks_nodup_uniq_vero_infectedAll_rev_peak_2771	KIAA1211L	5.57	5.47793	3.46282	intron	vero
peaks_nodup_uniq_vero_infectedAll_rev_peak_2772	KIAA1211L	6.27	5.19301	3.06313	intron	vero
peaks_nodup_uniq_vero_infectedAll_rev_peak_2774	KIAA1211L	4.18	4.33481	2.28299	intergenic	vero
peaks_nodup_uniq_vero_infectedAll_rev_peak_2778	TSGA10	16.02	5.67462	6.10595	exon	vero
peaks_nodup_uniq_vero_infectedAll_rev_peak_2779	TSGA10	13.93	6.22242	5.42236	intron	vero
peaks_nodup_uniq_vero_infectedAll_rev_peak_2780	TSGA10	9.06	4.1904	2.25618	intron	vero
peaks_nodup_uniq_vero_infectedAll_rev_peak_2782	TSGA10	13.93	3.73345	2.11967	intron	vero
peaks_nodup_uniq_vero_infectedAll_rev_peak_2783	REV1	22.99	3.42725	3.35657	exon	vero
peaks_nodup_uniq_vero_infectedAll_rev_peak_2785	RPL31	15.33	3.26544	1.99445	exon	vero
peaks_nodup_uniq_vero_infectedAll_rev_peak_2788	LOC103241145	4.18	4.33481	2.28299	intron	vero
peaks_nodup_uniq_vero_infectedAll_rev_peak_2790	SLC9A2	11.84	4.01367	2.10817	intron	vero
peaks_nodup_uniq_vero_infectedAll_rev_peak_2792	SLC9A2	11.84	6.42187	5.10709	intron	vero
peaks_nodup_uniq_vero_infectedAll_rev_peak_2793	TMEM182	55.74	5.15775	17.2973	intron	vero
peaks_nodup_uniq_vero_infectedAll_rev_peak_2797	TGFBRAP1	27.17	2.34758	1.65051	exon	vero
peaks_nodup_uniq_vero_infectedAll_rev_peak_2799	LOC103241186	60.61	5.13434	18.8185	intron	vero
peaks_nodup_uniq_vero_infectedAll_rev_peak_2800	FHL2	32.05	2.75398	3.5171	exon	vero
peaks_nodup_uniq_vero_infectedAll_rev_peak_2801	C14H2orf40	6.27	5.59247	3.77096	intron	vero
peaks_nodup_uniq_vero_infectedAll_rev_peak_2803	C14H2orf40	15.33	3.26544	1.99445	intron	vero
peaks_nodup_uniq_vero_infectedAll_rev_peak_2804	LOC103241205	4.88	4.91781	2.28299	exon	vero
peaks_nodup_uniq_vero_infectedAll_rev_peak_2810	LOC103241207	4.18	4.04699	1.68794	intron	vero
peaks_nodup_uniq_vero_infectedAll_rev_peak_2815	SULT1C2	12.54	6.77021	6.07627	intron	vero
peaks_nodup_uniq_vero_infectedAll_rev_peak_2816	NPHP1	12.54	4.51347	3.09663	intron	vero
peaks_nodup_uniq_vero_infectedAll_rev_peak_2817	NPHP1	17.42	5.75539	6.35203	intron	vero
peaks_nodup_uniq_vero_infectedAll_rev_peak_2820	BCL2L11	11.15	4.67194	3.26693	exon	vero
peaks_nodup_uniq_vero_infectedAll_rev_peak_2822	BCL2L11	6.27	5.19301	3.06313	tts	vero
peaks_nodup_uniq_vero_infectedAll_rev_peak_2823	LOC103241250	9.75	7.573	6.31286	intergenic	vero
peaks_nodup_uniq_vero_infectedAll_rev_peak_2824	LOC103241250	9.75	4.88803	2.72385	intergenic	vero
peaks_nodup_uniq_vero_infectedAll_rev_peak_2825a	LOC103241250	12.54	4.51347	3.09663	tts	vero
peaks_nodup_uniq_vero_infectedAll_rev_peak_2825b	LOC103241250	10.45	5.20471	3.53005	tts	vero
peaks_nodup_uniq_vero_infectedAll_rev_peak_2826	LOC103241250	11.84	5.83806	4.37591	tts	vero
peaks_nodup_uniq_vero_infectedAll_rev_peak_2827	LOC103241250	29.96	4.42252	7.26213	intergenic	vero
peaks_nodup_uniq_vero_infectedAll_rev_peak_2828a	LOC103241250	27.17	4.40171	6.96005	intergenic	vero
peaks_nodup_uniq_vero_infectedAll_rev_peak_2828b	LOC103241250	16.02	2.93515	1.6713	intergenic	vero
peaks_nodup_uniq_vero_infectedAll_rev_peak_2831	LOC103241251	37.62	3.51102	6.69169	intron	vero
peaks_nodup_uniq_vero_infectedAll_rev_peak_2832	LOC103241251	9.06	4.57135	2.72385	intron	vero
peaks_nodup_uniq_vero_infectedAll_rev_peak_2833	LOC103241252	22.29	5.82352	8.19476	intron	vero
peaks_nodup_uniq_vero_infectedAll_rev_peak_2834	LOC103241252	25.78	5.35551	8.15179	intergenic	vero
peaks_nodup_uniq_vero_infectedAll_rev_peak_2835	LOC103241256	16.02	3.86906	3.29483	tts	vero
peaks_nodup_uniq_vero_infectedAll_rev_peak_2837	LOC103241253	7.66	4.81311	2.28299	intron	vero
peaks_nodup_uniq_vero_infectedAll_rev_peak_2839	ZC3H8	4.18	4.24602	2.10817	intron	vero
peaks_nodup_uniq_vero_infectedAll_rev_peak_2841	LOC103241374	4.18	4.11122	1.81094	intergenic	vero
peaks_nodup_uniq_vero_infectedAll_rev_peak_2842	CKAP2L	16.02	10.3804	12.9329	intron	vero
peaks_nodup_uniq_vero_infectedAll_rev_peak_2843	CKAP2L	22.29	6.13002	8.73832	exon	vero
peaks_nodup_uniq_vero_infectedAll_rev_peak_2844	CKAP2L	17.42	3.68345	3.04065	exon	vero
peaks_nodup_uniq_vero_infectedAll_rev_peak_2845	LOC103241299	64.1	2.24467	4.84714	exon	vero
peaks_nodup_uniq_vero_infectedAll_rev_peak_2849	RMND5A	13.93	3.73345	2.11967	intron	vero
peaks_nodup_uniq_vero_infectedAll_rev_peak_2850a	LOC103219923	11.15	6.07352	5.10709	intergenic	vero
peaks_nodup_uniq_vero_infectedAll_rev_peak_2850b	LOC103219923	11.15	5.52138	4.37591	intergenic	vero
peaks_nodup_uniq_vero_infectedAll_rev_peak_2852	KDM3A	32.74	3.74938	6.31286	exon	vero
peaks_nodup_uniq_vero_infectedAll_rev_peak_2853	KDM3A	16.72	4.21918	3.58796	intron	vero
peaks_nodup_uniq_vero_infectedAll_rev_peak_2855	ATOH8	20.9	2.73759	1.59452	intron	vero
peaks_nodup_uniq_vero_infectedAll_rev_peak_2857	C14H2orf68	9.06	4.41095	2.50664	exon	vero
peaks_nodup_uniq_vero_infectedAll_rev_peak_2858	USP39	11.84	3.77757	1.79574	promoter-tss	vero
peaks_nodup_uniq_vero_infectedAll_rev_peak_2860	CAPG	7.66	4.3318	1.72073	intron	vero
peaks_nodup_uniq_vero_infectedAll_rev_peak_2861a	LOC103219954	31.35	4.62158	8.51348	intron	vero
peaks_nodup_uniq_vero_infectedAll_rev_peak_2861b	LOC103219954	20.2	3.534	3.43638	intron	vero
peaks_nodup_uniq_vero_infectedAll_rev_peak_2862	LOC103219948	10.45	3.81678	1.79641	intron	vero
peaks_nodup_uniq_vero_infectedAll_rev_peak_2863	TCF7L1	23.69	6.17187	8.99835	exon	vero
peaks_nodup_uniq_vero_infectedAll_rev_peak_2864	TCF7L1	9.75	5.2714	3.20313	intergenic	vero
peaks_nodup_uniq_vero_infectedAll_rev_peak_2867	LOC103219972	4.18	4.33481	2.28299	intergenic	vero
peaks_nodup_uniq_vero_infectedAll_rev_peak_2870	LOC103220004	4.88	4.91781	2.28299	intergenic	vero
peaks_nodup_uniq_vero_infectedAll_rev_peak_2873	POLE4	9.06	5.02849	3.32156	intergenic	vero
peaks_nodup_uniq_vero_infectedAll_rev_peak_2874	HK2	25.78	2.43432	1.52598	exon	vero
peaks_nodup_uniq_vero_infectedAll_rev_peak_2875	LOXL3	41.8	2.51773	3.63037	tts	vero
peaks_nodup_uniq_vero_infectedAll_rev_peak_2876	LOXL3	19.51	2.84824	1.79782	exon	vero
peaks_nodup_uniq_vero_infectedAll_rev_peak_2877	RTKN	14.63	4.07044	2.92473	intron	vero
peaks_nodup_uniq_vero_infectedAll_rev_peak_2878	WDR54	18.81	3.96213	3.59644	intron	vero
peaks_nodup_uniq_vero_infectedAll_rev_peak_2880	LOC103220039	10.45	6.36131	5.03808	promoter-tss	vero
peaks_nodup_uniq_vero_infectedAll_rev_peak_2882	BOLA3	4.18	4.33481	2.28299	intergenic	vero
peaks_nodup_uniq_vero_infectedAll_rev_peak_2883a	BOLA3	25.78	3.34719	3.81252	exon	vero
peaks_nodup_uniq_vero_infectedAll_rev_peak_2883b	BOLA3	32.05	4.13097	7.61394	exon	vero
peaks_nodup_uniq_vero_infectedAll_rev_peak_2884	BOLA3	16.72	3.54411	2.4688	exon	vero
peaks_nodup_uniq_vero_infectedAll_rev_peak_2885	BOLA3	15.33	7.42145	8.09077	intron	vero
peaks_nodup_uniq_vero_infectedAll_rev_peak_2888	DGUOK	17.42	3.06954	1.9585	intron	vero
peaks_nodup_uniq_vero_infectedAll_rev_peak_2890	ACTG2	10.45	5.72518	4.1955	intergenic	vero
peaks_nodup_uniq_vero_infectedAll_rev_peak_2891	TPRKB	9.75	4.88803	2.72385	intergenic	vero
peaks_nodup_uniq_vero_infectedAll_rev_peak_2892	TPRKB	34.83	2.7565	3.59644	intergenic	vero
peaks_nodup_uniq_vero_infectedAll_rev_peak_2893	LOC103220050	10.45	4.40398	2.50563	intergenic	vero
peaks_nodup_uniq_vero_infectedAll_rev_peak_2895a	LOC103220050	30.65	3.86029	6.19001	exon	vero
peaks_nodup_uniq_vero_infectedAll_rev_peak_2895b	LOC103220050	33.44	4.92016	9.8045	exon	vero
peaks_nodup_uniq_vero_infectedAll_rev_peak_2896	LOC103220053	41.8	3.45173	7.25466	exon	vero
peaks_nodup_uniq_vero_infectedAll_rev_peak_2897	ALMS1	43.19	4.41948	11.2987	promoter-tss	vero
peaks_nodup_uniq_vero_infectedAll_rev_peak_2898	RAB11FIP5	4.18	4.24602	2.10817	tts	vero
peaks_nodup_uniq_vero_infectedAll_rev_peak_2899	EMX1	5.57	4.69537	2.06426	intron	vero
peaks_nodup_uniq_vero_infectedAll_rev_peak_2901	LOC103220070	6.97	4.97931	2.12632	intron	vero
peaks_nodup_uniq_vero_infectedAll_rev_peak_2902	DYSF	4.88	4.89736	2.25618	intron	vero
peaks_nodup_uniq_vero_infectedAll_rev_peak_2904	DYSF	6.27	5.19301	3.06313	intron	vero
peaks_nodup_uniq_vero_infectedAll_rev_peak_2905	DYSF	41.1	2.66486	4.40533	exon	vero
peaks_nodup_uniq_vero_infectedAll_rev_peak_2906	DYSF	52.95	3.54924	9.861	exon	vero
peaks_nodup_uniq_vero_infectedAll_rev_peak_2907	ZNF638	41.1	3.45121	7.45374	exon	vero
peaks_nodup_uniq_vero_infectedAll_rev_peak_2908a	MPHOSPH10	39.01	4.54712	10.6569	exon	vero
peaks_nodup_uniq_vero_infectedAll_rev_peak_2908b	MPHOSPH10	35.53	2.60937	3.31651	exon	vero
peaks_nodup_uniq_vero_infectedAll_rev_peak_2909	SNRPG	50.86	2.07434	2.47835	exon	vero
peaks_nodup_uniq_vero_infectedAll_rev_peak_2911	MXD1	19.51	3.41789	2.9208	intron	vero
peaks_nodup_uniq_vero_infectedAll_rev_peak_2912	SNRNP27	27.17	3.52136	4.82114	exon	vero
peaks_nodup_uniq_vero_infectedAll_rev_peak_2913	LOC103220109	9.75	6.72104	5.06297	promoter-tss	vero
peaks_nodup_uniq_vero_infectedAll_rev_peak_2916	LOC103220114	5.57	5.38813	3.28047	intron	vero
peaks_nodup_uniq_vero_infectedAll_rev_peak_2917	ANTXR1	5.57	5.13556	2.7597	intron	vero
peaks_nodup_uniq_vero_infectedAll_rev_peak_2918	ANTXR1	4.18	4.31678	2.25618	intron	vero
peaks_nodup_uniq_vero_infectedAll_rev_peak_2921	APLF	19.51	3.41789	2.9208	exon	vero
peaks_nodup_uniq_vero_infectedAll_rev_peak_2924	APLF	4.18	4.31678	2.25618	intron	vero
peaks_nodup_uniq_vero_infectedAll_rev_peak_2925	PNO1	10.45	3.81678	1.79641	promoter-tss	vero
peaks_nodup_uniq_vero_infectedAll_rev_peak_2926	ETAA1	29.96	2.57981	2.35128	exon	vero
peaks_nodup_uniq_vero_infectedAll_rev_peak_2927	ETAA1	26.47	3.92489	5.4825	exon	vero
peaks_nodup_uniq_vero_infectedAll_rev_peak_2929	ETAA1	43.89	2.80572	5.06387	intron	vero
peaks_nodup_uniq_vero_infectedAll_rev_peak_2931	LOC103220142	10.45	5.72518	4.1955	exon	vero
peaks_nodup_uniq_vero_infectedAll_rev_peak_2932	LOC103220142	5.57	4.69537	2.06426	intron	vero
peaks_nodup_uniq_vero_infectedAll_rev_peak_2933	LOC103220145	6.97	6.63908	4.77562	exon	vero
peaks_nodup_uniq_vero_infectedAll_rev_peak_2936	LOC103220148	7.66	4.81311	2.28299	intergenic	vero
peaks_nodup_uniq_vero_infectedAll_rev_peak_2937a	SLC1A4	18.11	3.53962	3.08466	exon	vero
peaks_nodup_uniq_vero_infectedAll_rev_peak_2938	SLC1A4	4.88	4.89736	2.25618	intron	vero
peaks_nodup_uniq_vero_infectedAll_rev_peak_2939	SERTAD2	7.66	4.3318	1.72073	exon	vero
peaks_nodup_uniq_vero_infectedAll_rev_peak_2940	LOC103220160	43.19	2.14538	2.40412	exon	vero
peaks_nodup_uniq_vero_infectedAll_rev_peak_2943	UGP2	6.27	6.08381	4.82114	intergenic	vero
peaks_nodup_uniq_vero_infectedAll_rev_peak_2945	OTX1	13.24	4.7457	3.80568	intron	vero
peaks_nodup_uniq_vero_infectedAll_rev_peak_2949	LOC103220177	5.57	4.38235	1.60405	intron	vero
peaks_nodup_uniq_vero_infectedAll_rev_peak_2950	LOC103220177	6.97	4.97931	2.12632	intron	vero
peaks_nodup_uniq_vero_infectedAll_rev_peak_2951	LOC103220177	21.6	4.51948	5.42236	intron	vero
peaks_nodup_uniq_vero_infectedAll_rev_peak_2958	COMMD1	7.66	7.24981	6.19315	intron	vero
peaks_nodup_uniq_vero_infectedAll_rev_peak_2960	COMMD1	13.24	4.7457	3.80568	intron	vero
peaks_nodup_uniq_vero_infectedAll_rev_peak_2962	PUS10	16.72	5.53768	5.57358	intron	vero
peaks_nodup_uniq_vero_infectedAll_rev_peak_2964	BCL11A	4.88	4.91781	2.28299	promoter-tss	vero
peaks_nodup_uniq_vero_infectedAll_rev_peak_2965	FANCL	24.38	5.07683	7.44359	tts	vero
peaks_nodup_uniq_vero_infectedAll_rev_peak_2967a	LOC103220237	11.15	4.04901	2.41245	exon	vero
peaks_nodup_uniq_vero_infectedAll_rev_peak_2972	TSPYL6	4.18	4.33481	2.28299	intron	vero
peaks_nodup_uniq_vero_infectedAll_rev_peak_2974	LOC103220267	13.93	4.14828	2.6749	tts	vero
peaks_nodup_uniq_vero_infectedAll_rev_peak_2975	LOC103220286	25.78	6.69438	10.5911	intron	vero
peaks_nodup_uniq_vero_infectedAll_rev_peak_2976a	STON1	18.11	2.73056	1.52598	exon	vero
peaks_nodup_uniq_vero_infectedAll_rev_peak_2977	STON1	20.2	2.6505	1.59452	exon	vero
peaks_nodup_uniq_vero_infectedAll_rev_peak_2978	LOC103220311	17.42	4.60431	4.57711	intron	vero
peaks_nodup_uniq_vero_infectedAll_rev_peak_2979	FOXN2	17.42	5.1159	5.37727	exon	vero
peaks_nodup_uniq_vero_infectedAll_rev_peak_2980	MSH6	37.62	3.86213	7.82999	exon	vero
peaks_nodup_uniq_vero_infectedAll_rev_peak_2981	MSH6	47.37	2.30357	3.44992	intron	vero
peaks_nodup_uniq_vero_infectedAll_rev_peak_2982	LOC103220329	23.69	4.93749	6.75144	intron	vero
peaks_nodup_uniq_vero_infectedAll_rev_peak_2986	SOCS5	15.33	4.0818	3.29483	intron	vero
peaks_nodup_uniq_vero_infectedAll_rev_peak_2987	SOCS5	34.14	2.70291	3.59644	exon	vero
peaks_nodup_uniq_vero_infectedAll_rev_peak_2989	SOCS5	15.33	4.0818	3.29483	intron	vero
peaks_nodup_uniq_vero_infectedAll_rev_peak_2991	CRIPT	11.15	4.04901	2.41245	promoter-tss	vero
peaks_nodup_uniq_vero_infectedAll_rev_peak_2992	PIGF	27.87	9.02113	15.3189	tts	vero
peaks_nodup_uniq_vero_infectedAll_rev_peak_2993	TMEM247	7.66	4.3318	1.72073	exon	vero
peaks_nodup_uniq_vero_infectedAll_rev_peak_3001	LOC103220356	4.18	4.33481	2.28299	intergenic	vero
peaks_nodup_uniq_vero_infectedAll_rev_peak_3010	PREPL	10.45	4.08941	2.1463	intron	vero
peaks_nodup_uniq_vero_infectedAll_rev_peak_3011a	PPM1B	47.37	1.86057	1.35824	exon	vero
peaks_nodup_uniq_vero_infectedAll_rev_peak_3011b	PPM1B	46.68	2.64879	4.84919	exon	vero
peaks_nodup_uniq_vero_infectedAll_rev_peak_3014	DYNC2LI1	20.2	5.301	6.68741	intron	vero
peaks_nodup_uniq_vero_infectedAll_rev_peak_3015	LOC103220385	18.11	3.18566	2.41245	intron	vero
peaks_nodup_uniq_vero_infectedAll_rev_peak_3016	LOC103220385	13.93	3.24648	1.40376	intron	vero
peaks_nodup_uniq_vero_infectedAll_rev_peak_3017a	LOC103220385	31.35	2.2466	1.6946	exon	vero
peaks_nodup_uniq_vero_infectedAll_rev_peak_3018	LOC103220385	58.52	2.9761	8.28304	exon	vero
peaks_nodup_uniq_vero_infectedAll_rev_peak_3029	C14H2orf91	13.24	4.7457	3.80568	intron	vero
peaks_nodup_uniq_vero_infectedAll_rev_peak_3030	C14H2orf91	27.87	4.12394	6.07627	intron	vero
peaks_nodup_uniq_vero_infectedAll_rev_peak_3031	LOC103220411	8.36	5.85018	4.01918	intergenic	vero
peaks_nodup_uniq_vero_infectedAll_rev_peak_3037	LOC103220441	26.47	5.49485	8.87712	exon	vero
peaks_nodup_uniq_vero_infectedAll_rev_peak_3038	LOC103220451	9.75	5.37683	3.32156	intron	vero
peaks_nodup_uniq_vero_infectedAll_rev_peak_3039	LOC103220451	11.15	5.06127	3.77506	intron	vero
peaks_nodup_uniq_vero_infectedAll_rev_peak_3041	LOC103220468	11.84	4.28124	2.41245	exon	vero
peaks_nodup_uniq_vero_infectedAll_rev_peak_3043	NDUFAF7	11.84	4.28124	2.41245	intron	vero
peaks_nodup_uniq_vero_infectedAll_rev_peak_3045	CEBPZ	16.72	4.63889	4.24161	intron	vero
peaks_nodup_uniq_vero_infectedAll_rev_peak_3046	CEBPZ	16.72	3.54411	2.4688	intron	vero
peaks_nodup_uniq_vero_infectedAll_rev_peak_3048	SULT6B1	27.87	2.88676	2.96739	intron	vero
peaks_nodup_uniq_vero_infectedAll_rev_peak_3049	SULT6B1	16.02	3.40477	2.4688	intron	vero
peaks_nodup_uniq_vero_infectedAll_rev_peak_3050	SULT6B1	22.29	3.88235	4.54808	intron	vero
peaks_nodup_uniq_vero_infectedAll_rev_peak_3053	LOC103220493	16.72	2.95343	1.48745	intron	vero
peaks_nodup_uniq_vero_infectedAll_rev_peak_3054	LOC103220491	18.11	4.77849	5.2468	intron	vero
peaks_nodup_uniq_vero_infectedAll_rev_peak_3055	CRIM1	25.78	3.0429	3.07488	intron	vero
peaks_nodup_uniq_vero_infectedAll_rev_peak_3060	RASGRP3	6.97	5.69064	3.06313	exon	vero
peaks_nodup_uniq_vero_infectedAll_rev_peak_3064	TTC27	7.66	4.4202	1.82654	intron	vero
peaks_nodup_uniq_vero_infectedAll_rev_peak_3065a	BIRC6	43.89	2.04052	1.81311	exon	vero
peaks_nodup_uniq_vero_infectedAll_rev_peak_3065b	BIRC6	36.92	2.87307	4.26818	exon	vero
peaks_nodup_uniq_vero_infectedAll_rev_peak_3066	BIRC6	32.74	2.24963	1.71258	exon	vero
peaks_nodup_uniq_vero_infectedAll_rev_peak_3067	NLRC4	4.18	4.31678	2.25618	intron	vero
peaks_nodup_uniq_vero_infectedAll_rev_peak_3069a	LOC103220985	18.11	2.73056	1.52598	exon	vero
peaks_nodup_uniq_vero_infectedAll_rev_peak_3071	LOC103220530	4.88	4.89736	2.25618	intron	vero
peaks_nodup_uniq_vero_infectedAll_rev_peak_3074	LOC103220549	8.36	3.90012	1.55482	intron	vero
peaks_nodup_uniq_vero_infectedAll_rev_peak_3075	LOC103220549	18.81	3.30177	2.41245	intron	vero
peaks_nodup_uniq_vero_infectedAll_rev_peak_3077	LCLAT1	13.24	3.55928	2.11967	intron	vero
peaks_nodup_uniq_vero_infectedAll_rev_peak_3079	LCLAT1	26.47	3.92489	5.4825	intron	vero
peaks_nodup_uniq_vero_infectedAll_rev_peak_3080	YPEL5	4.18	4.04699	1.68794	intergenic	vero
peaks_nodup_uniq_vero_infectedAll_rev_peak_3082	LOC103220561	16.02	4.0533	3.58796	intron	vero
peaks_nodup_uniq_vero_infectedAll_rev_peak_3083	LOC103220561	13.24	3.55928	2.11967	intron	vero
peaks_nodup_uniq_vero_infectedAll_rev_peak_3085	CLIP4	16.72	4.66331	4.27997	intergenic	vero
peaks_nodup_uniq_vero_infectedAll_rev_peak_3086	LOC103220568	73.85	2.41449	6.76663	intron	vero
peaks_nodup_uniq_vero_infectedAll_rev_peak_3087	WDR43	15.33	3.26544	1.99445	intron	vero
peaks_nodup_uniq_vero_infectedAll_rev_peak_3089	FOSL2	65.49	1.76832	1.81755	exon	vero
peaks_nodup_uniq_vero_infectedAll_rev_peak_3092	LOC103220581	30.65	3.51715	5.26218	intron	vero
peaks_nodup_uniq_vero_infectedAll_rev_peak_3094	LOC103220581	25.78	8.92585	14.248	intron	vero
peaks_nodup_uniq_vero_infectedAll_rev_peak_3097	LOC103220579	6.27	4.54388	2.12632	intron	vero
peaks_nodup_uniq_vero_infectedAll_rev_peak_3098	LOC103220579	9.06	4.57135	2.72385	intron	vero
peaks_nodup_uniq_vero_infectedAll_rev_peak_3100	LOC103220579	9.06	6.05842	4.74099	intron	vero
peaks_nodup_uniq_vero_infectedAll_rev_peak_3101	LOC103220579	13.93	7.39297	6.96005	intron	vero
peaks_nodup_uniq_vero_infectedAll_rev_peak_3102	LOC103220578	11.84	4.28124	2.41245	intron	vero
peaks_nodup_uniq_vero_infectedAll_rev_peak_3103	LOC103220578	9.75	5.37683	3.32156	intron	vero
peaks_nodup_uniq_vero_infectedAll_rev_peak_3105	SUPT7L	11.15	4.04901	2.41245	intron	vero
peaks_nodup_uniq_vero_infectedAll_rev_peak_3106	SUPT7L	45.28	2.43605	3.86918	intron	vero
peaks_nodup_uniq_vero_infectedAll_rev_peak_3107	ZNF512	26.47	3.05269	3.34777	intron	vero
peaks_nodup_uniq_vero_infectedAll_rev_peak_3108	KRTCAP3	18.81	3.33512	2.46857	intron	vero
peaks_nodup_uniq_vero_infectedAll_rev_peak_3109	AGBL5	19.51	2.92962	1.97494	intergenic	vero
peaks_nodup_uniq_vero_infectedAll_rev_peak_3110	MAPRE3	25.78	2.67775	2.16897	intergenic	vero
peaks_nodup_uniq_vero_infectedAll_rev_peak_3111	LOC103220623	19.51	5.12683	5.97558	intergenic	vero
peaks_nodup_uniq_vero_infectedAll_rev_peak_3112	DPYSL5	13.24	4.7457	3.80568	promoter-tss	vero
peaks_nodup_uniq_vero_infectedAll_rev_peak_3113	CENPA	11.15	4.04901	2.41245	intergenic	vero
peaks_nodup_uniq_vero_infectedAll_rev_peak_3114	CENPA	18.81	3.30177	2.41245	exon	vero
peaks_nodup_uniq_vero_infectedAll_rev_peak_3115	SLC35F6	31.35	2.48854	2.44654	exon	vero
peaks_nodup_uniq_vero_infectedAll_rev_peak_3119	C14H2orf70	6.97	6.12839	3.77096	exon	vero
peaks_nodup_uniq_vero_infectedAll_rev_peak_3123	DRC1	20.2	3.02914	2.40412	exon	vero
peaks_nodup_uniq_vero_infectedAll_rev_peak_3124	GAREML	18.81	3.30177	2.41245	exon	vero
peaks_nodup_uniq_vero_infectedAll_rev_peak_3126	KIF3C	4.18	4.33481	2.28299	exon	vero
peaks_nodup_uniq_vero_infectedAll_rev_peak_3127	LOC103220664	14.63	4.88453	4.09233	tts	vero
peaks_nodup_uniq_vero_infectedAll_rev_peak_3128	LOC103220664	13.93	4.97793	3.80568	tts	vero
peaks_nodup_uniq_vero_infectedAll_rev_peak_3129a	CENPO	11.84	4.28124	2.41245	promoter-tss	vero
peaks_nodup_uniq_vero_infectedAll_rev_peak_3131	PTRHD1	20.9	4.38014	4.80775	tts	vero
peaks_nodup_uniq_vero_infectedAll_rev_peak_3132b	PTRHD1	18.11	3.18566	2.41245	intron	vero
peaks_nodup_uniq_vero_infectedAll_rev_peak_3133	NCOA1	22.29	2.98642	2.58544	exon	vero
peaks_nodup_uniq_vero_infectedAll_rev_peak_3136	FAM228A	4.18	4.11122	1.81094	intron	vero
peaks_nodup_uniq_vero_infectedAll_rev_peak_3137	FAM228A	11.15	4.33823	2.80892	intron	vero
peaks_nodup_uniq_vero_infectedAll_rev_peak_3138	FAM228A	7.66	4.3318	1.72073	intron	vero
peaks_nodup_uniq_vero_infectedAll_rev_peak_3139	FAM228A	14.63	3.90762	2.67335	intron	vero
peaks_nodup_uniq_vero_infectedAll_rev_peak_3140	FAM228A	13.93	3.73345	2.11967	promoter-tss	vero
peaks_nodup_uniq_vero_infectedAll_rev_peak_3141	FAM228B	41.1	2.39231	3.29483	promoter-tss	vero
peaks_nodup_uniq_vero_infectedAll_rev_peak_3144	PFN4	7.66	4.28891	1.67627	intergenic	vero
peaks_nodup_uniq_vero_infectedAll_rev_peak_3145	PFN4	16.72	2.95343	1.48745	intergenic	vero
peaks_nodup_uniq_vero_infectedAll_rev_peak_3146	PFN4	9.06	4.65601	2.84214	intergenic	vero
peaks_nodup_uniq_vero_infectedAll_rev_peak_3148b	PFN4	12.54	4.23138	2.71667	intergenic	vero
peaks_nodup_uniq_vero_infectedAll_rev_peak_3149	TP53I3	11.15	5.52138	4.37591	intergenic	vero
peaks_nodup_uniq_vero_infectedAll_rev_peak_3150	TP53I3	13.93	4.97793	3.80568	intron	vero
peaks_nodup_uniq_vero_infectedAll_rev_peak_3151	MFSD2B	28.56	4.22347	6.66456	exon	vero
peaks_nodup_uniq_vero_infectedAll_rev_peak_3155	LOC103220685	6.27	4.84681	2.51415	intron	vero
peaks_nodup_uniq_vero_infectedAll_rev_peak_3159	KLHL29	7.66	6.18828	4.15648	intron	vero
peaks_nodup_uniq_vero_infectedAll_rev_peak_3161	KLHL29	13.93	7.4669	7.04968	tts	vero
peaks_nodup_uniq_vero_infectedAll_rev_peak_3167	LOC103220732	4.18	4.33481	2.28299	intron	vero
peaks_nodup_uniq_vero_infectedAll_rev_peak_3168	LOC103220739	4.88	4.89736	2.25618	intergenic	vero
peaks_nodup_uniq_vero_infectedAll_rev_peak_3171	GEN1	14.63	3.90762	2.67335	exon	vero
peaks_nodup_uniq_vero_infectedAll_rev_peak_3174	LOC103220769	4.18	4.17753	1.9585	intergenic	vero
peaks_nodup_uniq_vero_infectedAll_rev_peak_3179	LOC103220781	4.18	4.24602	2.10817	intron	vero
peaks_nodup_uniq_vero_infectedAll_rev_peak_3181	LOC103220781	25.78	4.0572	5.44386	promoter-tss	vero
peaks_nodup_uniq_vero_infectedAll_rev_peak_3183	TRIB2	39.71	3.39261	6.66916	exon	vero
peaks_nodup_uniq_vero_infectedAll_rev_peak_3184	LOC103220791	4.88	4.89736	2.25618	intergenic	vero
peaks_nodup_uniq_vero_infectedAll_rev_peak_3185	LPIN1	26.47	2.80349	2.6924	promoter-tss	vero
peaks_nodup_uniq_vero_infectedAll_rev_peak_3187	ODC1	4.18	4.33481	2.28299	intergenic	vero
peaks_nodup_uniq_vero_infectedAll_rev_peak_3188	HPCAL1	17.42	7.67386	9.1247	intron	vero
peaks_nodup_uniq_vero_infectedAll_rev_peak_3189	HPCAL1	20.2	8.83501	12.1525	intron	vero
peaks_nodup_uniq_vero_infectedAll_rev_peak_3190b	KLF11	33.44	3.13101	4.77562	exon	vero
peaks_nodup_uniq_vero_infectedAll_rev_peak_3193	LOC103220850	9.75	4.48069	2.25618	intron	vero
peaks_nodup_uniq_vero_infectedAll_rev_peak_3195	LOC103220850	14.63	3.90762	2.67335	intron	vero
peaks_nodup_uniq_vero_infectedAll_rev_peak_3198	RNF144A	4.18	4.31678	2.25618	intron	vero
peaks_nodup_uniq_vero_infectedAll_rev_peak_3204a	LOC103220922	12.54	3.22391	1.31858	intron	vero
peaks_nodup_uniq_vero_infectedAll_rev_peak_3205	LOC103220926	4.18	3.98472	1.56304	intergenic	vero
peaks_nodup_uniq_vero_infectedAll_rev_peak_3209	LOC103220929	4.18	4.33481	2.28299	intergenic	vero
peaks_nodup_uniq_vero_infectedAll_rev_peak_3214	LOC103220959	4.88	4.91781	2.28299	intergenic	vero
peaks_nodup_uniq_vero_infectedAll_rev_peak_3216	GORASP1	41.1	3.8277	8.81842	exon	vero
peaks_nodup_uniq_vero_infectedAll_rev_peak_3217	GORASP1	14.63	6.30262	6.05182	intron	vero
peaks_nodup_uniq_vero_infectedAll_rev_peak_3219	LOC103221055	4.18	4.33481	2.28299	intron	vero
peaks_nodup_uniq_vero_infectedAll_rev_peak_3222	EXOG	35.53	3.65312	6.75144	exon	vero
peaks_nodup_uniq_vero_infectedAll_rev_peak_3223	ACVR2B	27.17	2.30909	1.53394	intergenic	vero
peaks_nodup_uniq_vero_infectedAll_rev_peak_3225	ACVR2B	74.55	2.51819	7.70427	tts	vero
peaks_nodup_uniq_vero_infectedAll_rev_peak_3226	SLC22A14	8.36	4.68014	2.4688	intron	vero
peaks_nodup_uniq_vero_infectedAll_rev_peak_3229	OXSR1	6.27	6.05851	4.77562	intron	vero
peaks_nodup_uniq_vero_infectedAll_rev_peak_3233	CTDSPL	9.06	3.64383	1.55732	intron	vero
peaks_nodup_uniq_vero_infectedAll_rev_peak_3236	GOLGA4	59.22	1.77114	1.57132	exon	vero
peaks_nodup_uniq_vero_infectedAll_rev_peak_3237a	GOLGA4	47.37	2.14048	2.67335	exon	vero
peaks_nodup_uniq_vero_infectedAll_rev_peak_3237b	GOLGA4	49.47	1.86907	1.50536	exon	vero
peaks_nodup_uniq_vero_infectedAll_rev_peak_3240	DCLK3	8.36	4.68014	2.4688	intergenic	vero
peaks_nodup_uniq_vero_infectedAll_rev_peak_3245	IGF2BP2	9.06	5.02849	3.32156	promoter-tss	vero
peaks_nodup_uniq_vero_infectedAll_rev_peak_3246a	LOC103221112	17.42	6.13908	6.93709	promoter-tss	vero
peaks_nodup_uniq_vero_infectedAll_rev_peak_3248	MAP3K13	9.06	5.02849	3.32156	intron	vero
peaks_nodup_uniq_vero_infectedAll_rev_peak_3253	C15H3orf70	7.66	5.85378	3.64493	intron	vero
peaks_nodup_uniq_vero_infectedAll_rev_peak_3254	VPS8	7.66	5.41474	3.04391	intron	vero
peaks_nodup_uniq_vero_infectedAll_rev_peak_3255	FAM131A	16.02	5.67462	6.10595	exon	vero
peaks_nodup_uniq_vero_infectedAll_rev_peak_3256	FAM131A	15.33	3.26544	1.99445	intron	vero
peaks_nodup_uniq_vero_infectedAll_rev_peak_3260	YEATS2	11.15	4.04901	2.41245	intron	vero
peaks_nodup_uniq_vero_infectedAll_rev_peak_3261	LOC103221163	6.97	4.97931	2.12632	intron	vero
peaks_nodup_uniq_vero_infectedAll_rev_peak_3262	LOC103221163	10.45	5.72518	4.1955	tts	vero
peaks_nodup_uniq_vero_infectedAll_rev_peak_3264	B3GNT5	9.06	5.02849	3.32156	exon	vero
peaks_nodup_uniq_vero_infectedAll_rev_peak_3266	SOX2	5.57	5.50081	3.51836	exon	vero
peaks_nodup_uniq_vero_infectedAll_rev_peak_3268	LOC103221185	6.97	6.53025	4.53734	intergenic	vero
peaks_nodup_uniq_vero_infectedAll_rev_peak_3269	LOC103221185	4.18	4.33481	2.28299	intergenic	vero
peaks_nodup_uniq_vero_infectedAll_rev_peak_3270	LOC103221185	8.36	4.68014	2.4688	intergenic	vero
peaks_nodup_uniq_vero_infectedAll_rev_peak_3272	DNAJC19	7.66	5.41474	3.04391	intergenic	vero
peaks_nodup_uniq_vero_infectedAll_rev_peak_3273	CCDC39	5.57	5.47793	3.46282	intron	vero
peaks_nodup_uniq_vero_infectedAll_rev_peak_3274	TTC14	16.02	8.51194	10.1754	intron	vero
peaks_nodup_uniq_vero_infectedAll_rev_peak_3277	USP13	4.88	4.73938	1.9585	intron	vero
peaks_nodup_uniq_vero_infectedAll_rev_peak_3278	NDUFB5	17.42	6.13908	6.93709	promoter-tss	vero
peaks_nodup_uniq_vero_infectedAll_rev_peak_3279a	LOC103221211	20.2	4.07769	4.50693	exon	vero
peaks_nodup_uniq_vero_infectedAll_rev_peak_3279b	LOC103221211	20.2	3.534	3.43638	exon	vero
peaks_nodup_uniq_vero_infectedAll_rev_peak_3279c	LOC103221211	21.6	4.51948	5.42236	exon	vero
peaks_nodup_uniq_vero_infectedAll_rev_peak_3280	KCNMB3	38.32	4.36866	9.7487	tts	vero
peaks_nodup_uniq_vero_infectedAll_rev_peak_3281	PIK3CA	26.47	2.74742	2.52939	exon	vero
peaks_nodup_uniq_vero_infectedAll_rev_peak_3282	PIK3CA	14.63	7.81525	8.07374	intron	vero
peaks_nodup_uniq_vero_infectedAll_rev_peak_3283	PIK3CA	18.81	6.60354	7.76925	promoter-tss	vero
peaks_nodup_uniq_vero_infectedAll_rev_peak_3286	NAALADL2	4.18	4.31678	2.25618	intron	vero
peaks_nodup_uniq_vero_infectedAll_rev_peak_3287	LOC103221231	9.06	5.02849	3.32156	intergenic	vero
peaks_nodup_uniq_vero_infectedAll_rev_peak_3288	LOC103221231	8.36	5.85018	4.01918	intergenic	vero
peaks_nodup_uniq_vero_infectedAll_rev_peak_3289a	LOC103221231	6.97	4.42606	1.47717	intergenic	vero
peaks_nodup_uniq_vero_infectedAll_rev_peak_3290	LOC103221231	11.15	4.04901	2.41245	intergenic	vero
peaks_nodup_uniq_vero_infectedAll_rev_peak_3293	LOC103221232	39.71	2.99348	5.22558	exon	vero
peaks_nodup_uniq_vero_infectedAll_rev_peak_3294	LOC103221232	50.86	2.88102	6.44811	exon	vero
peaks_nodup_uniq_vero_infectedAll_rev_peak_3296	LOC103221232	45.98	2.61009	4.48724	exon	vero
peaks_nodup_uniq_vero_infectedAll_rev_peak_3300	LOC103221233	30.65	2.87767	3.44196	intron	vero
peaks_nodup_uniq_vero_infectedAll_rev_peak_3302	LOC103221233	31.35	3.23511	4.77156	intron	vero
peaks_nodup_uniq_vero_infectedAll_rev_peak_3303	LOC103221233	50.16	2.32553	3.91024	intron	vero
peaks_nodup_uniq_vero_infectedAll_rev_peak_3305b	LOC103221233	35.53	6.08853	13.2963	intron	vero
peaks_nodup_uniq_vero_infectedAll_rev_peak_3306	LOC103221233	16.72	3.54411	2.4688	intron	vero
peaks_nodup_uniq_vero_infectedAll_rev_peak_3307	NLGN1	31.35	2.94101	3.86918	intron	vero
peaks_nodup_uniq_vero_infectedAll_rev_peak_3308	NLGN1	52.95	2.24785	3.53475	exon	vero
peaks_nodup_uniq_vero_infectedAll_rev_peak_3310	NLGN1	36.92	2.52831	3.04782	promoter-tss	vero
peaks_nodup_uniq_vero_infectedAll_rev_peak_3311	LOC103221239	4.88	4.66415	1.81094	intron	vero
peaks_nodup_uniq_vero_infectedAll_rev_peak_3313	LOC103221248	18.11	3.18566	2.41245	intron	vero
peaks_nodup_uniq_vero_infectedAll_rev_peak_3314	FNDC3B	15.33	4.0818	3.29483	intron	vero
peaks_nodup_uniq_vero_infectedAll_rev_peak_3317	CLDN11	48.77	3.82833	10.2057	exon	vero
peaks_nodup_uniq_vero_infectedAll_rev_peak_3318	SKIL	57.83	3.67658	11.5511	exon	vero
peaks_nodup_uniq_vero_infectedAll_rev_peak_3320	LOC103221272	92.66	1.91142	4.40994	exon	vero
peaks_nodup_uniq_vero_infectedAll_rev_peak_3321	ACTRT3	25.08	4.34681	6.32583	exon	vero
peaks_nodup_uniq_vero_infectedAll_rev_peak_3326	LOC103221310	5.57	5.47793	3.46282	exon	vero
peaks_nodup_uniq_vero_infectedAll_rev_peak_3329	LOC103221311	4.18	4.33481	2.28299	intron	vero
peaks_nodup_uniq_vero_infectedAll_rev_peak_3331	LOC103221311	4.18	4.04699	1.68794	intron	vero
peaks_nodup_uniq_vero_infectedAll_rev_peak_3335	NMD3	11.15	5.06127	3.77506	intron	vero
peaks_nodup_uniq_vero_infectedAll_rev_peak_3337	NMD3	18.81	3.30177	2.41245	intron	vero
peaks_nodup_uniq_vero_infectedAll_rev_peak_3338a	B3GALNT1	4.88	4.91781	2.28299	intron	vero
peaks_nodup_uniq_vero_infectedAll_rev_peak_3338b	B3GALNT1	5.57	5.50081	3.51836	intron	vero
peaks_nodup_uniq_vero_infectedAll_rev_peak_3340	LOC103241389	18.11	9.55697	12.3828	intron	vero
peaks_nodup_uniq_vero_infectedAll_rev_peak_3341	LOC103241389	5.57	4.69537	2.06426	intron	vero
peaks_nodup_uniq_vero_infectedAll_rev_peak_3345	PPM1L	22.99	3.99846	4.54808	intron	vero
peaks_nodup_uniq_vero_infectedAll_rev_peak_3346	ARL14	5.57	5.47793	3.46282	exon	vero
peaks_nodup_uniq_vero_infectedAll_rev_peak_3348	KPNA4	9.75	4.48069	2.25618	promoter-tss	vero
peaks_nodup_uniq_vero_infectedAll_rev_peak_3349	LOC103241405	15.33	3.26544	1.99445	tts	vero
peaks_nodup_uniq_vero_infectedAll_rev_peak_3351	MLF1	18.11	4.77849	5.2468	intron	vero
peaks_nodup_uniq_vero_infectedAll_rev_peak_3352	MLF1	25.78	3.34719	3.81252	intron	vero
peaks_nodup_uniq_vero_infectedAll_rev_peak_3357	LOC103241416	5.57	4.69537	2.06426	intron	vero
peaks_nodup_uniq_vero_infectedAll_rev_peak_3362	PTX3	9.06	4.57135	2.72385	exon	vero
peaks_nodup_uniq_vero_infectedAll_rev_peak_3363	CCNL1	18.11	2.73056	1.52598	exon	vero
peaks_nodup_uniq_vero_infectedAll_rev_peak_3367	LEKR1	6.97	5.69064	3.06313	intron	vero
peaks_nodup_uniq_vero_infectedAll_rev_peak_3369	TIPARP	19.51	5.12683	5.97558	exon	vero
peaks_nodup_uniq_vero_infectedAll_rev_peak_3370	TIPARP	25.08	3.26011	3.81252	exon	vero
peaks_nodup_uniq_vero_infectedAll_rev_peak_3378	ARHGEF26	9.06	5.02849	3.32156	intergenic	vero
peaks_nodup_uniq_vero_infectedAll_rev_peak_3379	ARHGEF26	11.15	4.53248	3.07003	intergenic	vero
peaks_nodup_uniq_vero_infectedAll_rev_peak_3380a	ARHGEF26	41.1	3.50873	7.6651	intergenic	vero
peaks_nodup_uniq_vero_infectedAll_rev_peak_3380b	ARHGEF26	35.53	4.15127	8.2458	intergenic	vero
peaks_nodup_uniq_vero_infectedAll_rev_peak_3381	ARHGEF26	16.02	4.25597	3.91024	intergenic	vero
peaks_nodup_uniq_vero_infectedAll_rev_peak_3382	ARHGEF26	10.45	5.72518	4.1955	intergenic	vero
peaks_nodup_uniq_vero_infectedAll_rev_peak_3386	RAP2B	43.89	3.74096	8.71001	exon	vero
peaks_nodup_uniq_vero_infectedAll_rev_peak_3388	P2RY1	22.29	3.88235	4.54808	exon	vero
peaks_nodup_uniq_vero_infectedAll_rev_peak_3391	MBNL1	13.93	4.66681	3.38713	intron	vero
peaks_nodup_uniq_vero_infectedAll_rev_peak_3393	TSC22D2	46.68	4.33439	11.6506	exon	vero
peaks_nodup_uniq_vero_infectedAll_rev_peak_3395	TSC22D2	42.5	2.07134	1.9585	exon	vero
peaks_nodup_uniq_vero_infectedAll_rev_peak_3397	LOC103241490	27.87	2.62433	2.25618	exon	vero
peaks_nodup_uniq_vero_infectedAll_rev_peak_3399	WWTR1	4.88	4.81707	2.10817	intron	vero
peaks_nodup_uniq_vero_infectedAll_rev_peak_3402	LOC103241496	29.96	3.09577	3.82294	intron	vero
peaks_nodup_uniq_vero_infectedAll_rev_peak_3405	PLOD2	4.18	4.33481	2.28299	intergenic	vero
peaks_nodup_uniq_vero_infectedAll_rev_peak_3407	C15H3orf58	17.42	6.13908	6.93709	exon	vero
peaks_nodup_uniq_vero_infectedAll_rev_peak_3408	C15H3orf58	6.27	4.54388	2.12632	intron	vero
peaks_nodup_uniq_vero_infectedAll_rev_peak_3409	C15H3orf58	9.75	5.37683	3.32156	intron	vero
peaks_nodup_uniq_vero_infectedAll_rev_peak_3410	CHST2	5.57	5.47793	3.46282	exon	vero
peaks_nodup_uniq_vero_infectedAll_rev_peak_3412	TRPC1	9.75	3.84059	1.49348	intron	vero
peaks_nodup_uniq_vero_infectedAll_rev_peak_3413	TRPC1	20.2	7.57286	10.2934	intron	vero
peaks_nodup_uniq_vero_infectedAll_rev_peak_3414	TRPC1	13.93	3.92995	2.38233	intron	vero
peaks_nodup_uniq_vero_infectedAll_rev_peak_3415	TRPC1	28.56	4.22347	6.66456	intron	vero
peaks_nodup_uniq_vero_infectedAll_rev_peak_3423c	ZBTB38	32.74	2.22003	1.60608	exon	vero
peaks_nodup_uniq_vero_infectedAll_rev_peak_3424	ZBTB38	22.99	3.99846	4.54808	intron	vero
peaks_nodup_uniq_vero_infectedAll_rev_peak_3425	LOC103241569	35.53	2.81009	3.99849	intergenic	vero
peaks_nodup_uniq_vero_infectedAll_rev_peak_3426	LOC103242047	36.23	2.65913	3.68821	exon	vero
peaks_nodup_uniq_vero_infectedAll_rev_peak_3433	LOC103241584	5.57	5.50081	3.51836	intergenic	vero
peaks_nodup_uniq_vero_infectedAll_rev_peak_3438	FAIM	7.66	5.85378	3.64493	intergenic	vero
peaks_nodup_uniq_vero_infectedAll_rev_peak_3440	MRAS	9.75	4.13602	1.85192	intron	vero
peaks_nodup_uniq_vero_infectedAll_rev_peak_3442	NME9	20.9	4.38014	4.80775	intron	vero
peaks_nodup_uniq_vero_infectedAll_rev_peak_3445	IL20RB	29.26	6.0522	11.1172	exon	vero
peaks_nodup_uniq_vero_infectedAll_rev_peak_3448	LOC103241627	21.6	3.2282	2.87503	exon	vero
peaks_nodup_uniq_vero_infectedAll_rev_peak_3449	LOC103241627	8.36	3.90012	1.55482	intron	vero
peaks_nodup_uniq_vero_infectedAll_rev_peak_3450	LOC103241627	18.11	4.77849	5.2468	intron	vero
peaks_nodup_uniq_vero_infectedAll_rev_peak_3454	PPP2R3A	38.32	2.55311	3.52513	exon	vero
peaks_nodup_uniq_vero_infectedAll_rev_peak_3455	LOC103241640	8.36	5.85018	4.01918	intergenic	vero
peaks_nodup_uniq_vero_infectedAll_rev_peak_3456	LOC103241640	10.45	5.20471	3.53005	promoter-tss	vero
peaks_nodup_uniq_vero_infectedAll_rev_peak_3459	AMOTL2	13.93	4.97793	3.80568	intergenic	vero
peaks_nodup_uniq_vero_infectedAll_rev_peak_3460	LOC103241642	12.54	6.77021	6.07627	exon	vero
peaks_nodup_uniq_vero_infectedAll_rev_peak_3464a	LOC103242053	28.56	2.63967	2.46977	promoter-tss	vero
peaks_nodup_uniq_vero_infectedAll_rev_peak_3464b	LOC103242053	27.17	2.81709	2.96739	promoter-tss	vero
peaks_nodup_uniq_vero_infectedAll_rev_peak_3465a	ACKR4	7.66	6.18828	4.15648	exon	vero
peaks_nodup_uniq_vero_infectedAll_rev_peak_3465b	ACKR4	10.45	5.72518	4.1955	exon	vero
peaks_nodup_uniq_vero_infectedAll_rev_peak_3467	LOC103241683	13.24	3.43892	1.94372	intergenic	vero
peaks_nodup_uniq_vero_infectedAll_rev_peak_3468	LOC103241683	29.96	3.86971	5.90315	exon	vero
peaks_nodup_uniq_vero_infectedAll_rev_peak_3471	LOC103241681	4.88	4.66415	1.81094	intron	vero
peaks_nodup_uniq_vero_infectedAll_rev_peak_3474	NEK11	12.54	9.02695	9.26013	intron	vero
peaks_nodup_uniq_vero_infectedAll_rev_peak_3475a	NEK11	10.45	3.81678	1.79641	promoter-tss	vero
peaks_nodup_uniq_vero_infectedAll_rev_peak_3475b	NEK11	13.24	4.7457	3.80568	promoter-tss	vero
peaks_nodup_uniq_vero_infectedAll_rev_peak_3476	NEK11	22.99	2.99885	2.4125	intron	vero
peaks_nodup_uniq_vero_infectedAll_rev_peak_3478	LOC103241688	8.36	4.25467	1.99445	intron	vero
peaks_nodup_uniq_vero_infectedAll_rev_peak_3480	CAPN7	19.51	2.92962	1.97494	exon	vero
peaks_nodup_uniq_vero_infectedAll_rev_peak_3481	METTL6	31.35	5.39184	10.3476	exon	vero
peaks_nodup_uniq_vero_infectedAll_rev_peak_3482	COLQ	4.18	4.33481	2.28299	intron	vero
peaks_nodup_uniq_vero_infectedAll_rev_peak_3484	LOC103241722	34.83	3.25768	5.22886	exon	vero
peaks_nodup_uniq_vero_infectedAll_rev_peak_3486	ANKRD28	7.66	4.3318	1.72073	intron	vero
peaks_nodup_uniq_vero_infectedAll_rev_peak_3487	PLCL2	9.06	7.18355	6.48584	intergenic	vero
peaks_nodup_uniq_vero_infectedAll_rev_peak_3489	PLCL2	4.88	4.91781	2.28299	intron	vero
peaks_nodup_uniq_vero_infectedAll_rev_peak_3490	TBC1D5	5.57	4.69537	2.06426	intron	vero
peaks_nodup_uniq_vero_infectedAll_rev_peak_3492	TBC1D5	11.15	4.33823	2.80892	intron	vero
peaks_nodup_uniq_vero_infectedAll_rev_peak_3493	TBC1D5	6.27	4.03901	1.47717	intron	vero
peaks_nodup_uniq_vero_infectedAll_rev_peak_3495	TBC1D5	12.54	3.38511	1.55482	intron	vero
peaks_nodup_uniq_vero_infectedAll_rev_peak_3496	TBC1D5	11.15	4.04901	2.41245	intron	vero
peaks_nodup_uniq_vero_infectedAll_rev_peak_3498	TBC1D5	5.57	4.44157	1.69093	intron	vero
peaks_nodup_uniq_vero_infectedAll_rev_peak_3499	TBC1D5	9.06	5.02849	3.32156	intron	vero
peaks_nodup_uniq_vero_infectedAll_rev_peak_3500	TBC1D5	8.36	4.68014	2.4688	intron	vero
peaks_nodup_uniq_vero_infectedAll_rev_peak_3501	TBC1D5	6.27	4.03901	1.47717	intron	vero
peaks_nodup_uniq_vero_infectedAll_rev_peak_3504	SATB1	57.13	1.76147	1.44111	intron	vero
peaks_nodup_uniq_vero_infectedAll_rev_peak_3505	SATB1	4.18	4.33481	2.28299	intron	vero
peaks_nodup_uniq_vero_infectedAll_rev_peak_3506	EFHB	15.33	4.0818	3.29483	intron	vero
peaks_nodup_uniq_vero_infectedAll_rev_peak_3507	SGOL1	26.47	6.86856	11.4298	exon	vero
peaks_nodup_uniq_vero_infectedAll_rev_peak_3509	NKIRAS1	6.27	5.11987	2.9538	intron	vero
peaks_nodup_uniq_vero_infectedAll_rev_peak_3511	LOC103241766	15.33	3.26544	1.99445	exon	vero
peaks_nodup_uniq_vero_infectedAll_rev_peak_3513	THRB	6.97	6.22414	3.92223	intron	vero
peaks_nodup_uniq_vero_infectedAll_rev_peak_3514	THRB	20.9	2.73759	1.59452	intron	vero
peaks_nodup_uniq_vero_infectedAll_rev_peak_3516	THRB	9.06	5.52581	3.9811	intron	vero
peaks_nodup_uniq_vero_infectedAll_rev_peak_3518	THRB	20.9	5.47518	6.68741	intron	vero
peaks_nodup_uniq_vero_infectedAll_rev_peak_3524	SLC4A7	5.57	4.56495	1.86209	intron	vero
peaks_nodup_uniq_vero_infectedAll_rev_peak_3528	LOC103241806	34.14	2.70291	3.59644	promoter-tss	vero
peaks_nodup_uniq_vero_infectedAll_rev_peak_3530	LOC103241802	14.63	3.1261	1.48745	exon	vero
peaks_nodup_uniq_vero_infectedAll_rev_peak_3531	LOC103241807	5.57	5.50081	3.51836	intergenic	vero
peaks_nodup_uniq_vero_infectedAll_rev_peak_3536	CMTM6	7.66	6.01638	3.88719	intron	vero
peaks_nodup_uniq_vero_infectedAll_rev_peak_3542	CRTAP	50.16	3.00951	7.25	exon	vero
peaks_nodup_uniq_vero_infectedAll_rev_peak_3543	SUSD5	8.36	4.68014	2.4688	intron	vero
peaks_nodup_uniq_vero_infectedAll_rev_peak_3544	UBP1	7.66	6.18828	4.15648	intron	vero
peaks_nodup_uniq_vero_infectedAll_rev_peak_3545	CLASP2	5.57	4.76342	2.15938	intron	vero
peaks_nodup_uniq_vero_infectedAll_rev_peak_3547	LOC103241852	19.51	3.41789	2.9208	intergenic	vero
peaks_nodup_uniq_vero_infectedAll_rev_peak_3548	LOC103241852	20.9	5.21445	6.2478	tts	vero
peaks_nodup_uniq_vero_infectedAll_rev_peak_3549a	LOC103241852	20.2	3.534	3.43638	promoter-tss	vero
peaks_nodup_uniq_vero_infectedAll_rev_peak_3551	ADIPOQ	13.93	6.78809	6.15709	intergenic	vero
peaks_nodup_uniq_vero_infectedAll_rev_peak_3552	ST6GAL1	4.18	4.33481	2.28299	intergenic	vero
peaks_nodup_uniq_vero_infectedAll_rev_peak_3556	MASP1	11.84	4.28124	2.41245	promoter-tss	vero
peaks_nodup_uniq_vero_infectedAll_rev_peak_3557	SST	4.88	4.91781	2.28299	intergenic	vero
peaks_nodup_uniq_vero_infectedAll_rev_peak_3561	LOC103241888	33.44	3.13101	4.77562	intergenic	vero
peaks_nodup_uniq_vero_infectedAll_rev_peak_3564	TMEM207	24.38	4.23069	5.72581	intergenic	vero
peaks_nodup_uniq_vero_infectedAll_rev_peak_3565	TMEM207	31.35	4.62158	8.51348	intron	vero
peaks_nodup_uniq_vero_infectedAll_rev_peak_3566	LOC103241915	10.45	3.81678	1.79641	exon	vero
peaks_nodup_uniq_vero_infectedAll_rev_peak_3567	LOC103241915	5.57	4.69537	2.06426	intron	vero
peaks_nodup_uniq_vero_infectedAll_rev_peak_3568	LOC103241918	5.57	5.50081	3.51836	intron	vero
peaks_nodup_uniq_vero_infectedAll_rev_peak_3569	FGF12	13.24	3.55928	2.11967	promoter-tss	vero
peaks_nodup_uniq_vero_infectedAll_rev_peak_3571	FGF12	9.06	8.38081	9.02597	intron	vero
peaks_nodup_uniq_vero_infectedAll_rev_peak_3574	FGF12	6.97	5.61049	2.9538	intergenic	vero
peaks_nodup_uniq_vero_infectedAll_rev_peak_3575a	MB21D2	17.42	2.8777	1.58541	exon	vero
peaks_nodup_uniq_vero_infectedAll_rev_peak_3575b	MB21D2	18.11	2.73056	1.52598	exon	vero
peaks_nodup_uniq_vero_infectedAll_rev_peak_3577	ATP13A4	5.57	5.50081	3.51836	intron	vero
peaks_nodup_uniq_vero_infectedAll_rev_peak_3578	OPA1	4.18	4.31678	2.25618	promoter-tss	vero
peaks_nodup_uniq_vero_infectedAll_rev_peak_3580	LOC103241930	9.75	5.37683	3.32156	intergenic	vero
peaks_nodup_uniq_vero_infectedAll_rev_peak_3581b	LOC103241930	11.84	4.58705	2.80892	intergenic	vero
peaks_nodup_uniq_vero_infectedAll_rev_peak_3587	LOC103241930	14.63	3.90762	2.67335	promoter-tss	vero
peaks_nodup_uniq_vero_infectedAll_rev_peak_3589	CPN2	6.97	4.97931	2.12632	exon	vero
peaks_nodup_uniq_vero_infectedAll_rev_peak_3591	LOC103241948	6.27	4.54388	2.12632	intergenic	vero
peaks_nodup_uniq_vero_infectedAll_rev_peak_3592	LOC103241948	6.27	4.1308	1.58339	intergenic	vero
peaks_nodup_uniq_vero_infectedAll_rev_peak_3593	LOC103241945	11.84	4.28124	2.41245	intron	vero
peaks_nodup_uniq_vero_infectedAll_rev_peak_3594	LOC103241952	15.33	3.26544	1.99445	exon	vero
peaks_nodup_uniq_vero_infectedAll_rev_peak_3595	LOC103241952	24.38	2.53842	1.78849	exon	vero
peaks_nodup_uniq_vero_infectedAll_rev_peak_3598	LOC103241955	4.18	4.04699	1.68794	intron	vero
peaks_nodup_uniq_vero_infectedAll_rev_peak_3601b	LOC103241956	26.47	3.71273	4.99366	exon	vero
peaks_nodup_uniq_vero_infectedAll_rev_peak_3601c	LOC103241956	23.69	4.11458	5.11591	exon	vero
peaks_nodup_uniq_vero_infectedAll_rev_peak_3601d	LOC103241956	16.72	2.95343	1.48745	exon	vero
peaks_nodup_uniq_vero_infectedAll_rev_peak_3603a	LOC103241958	14.63	3.90762	2.67335	intron	vero
peaks_nodup_uniq_vero_infectedAll_rev_peak_3603b	LOC103241958	11.15	3.79595	2.10817	intron	vero
peaks_nodup_uniq_vero_infectedAll_rev_peak_3603c	LOC103241958	19.51	8.54472	11.1183	intron	vero
peaks_nodup_uniq_vero_infectedAll_rev_peak_3606	LOC103241957	5.57	5.13556	2.7597	intron	vero
peaks_nodup_uniq_vero_infectedAll_rev_peak_3609	ACAP2	11.15	3.79595	2.10817	intron	vero
peaks_nodup_uniq_vero_infectedAll_rev_peak_3610	ACAP2	23.69	4.11458	5.11591	intron	vero
peaks_nodup_uniq_vero_infectedAll_rev_peak_3612	DLG1	5.57	5.50081	3.51836	intron	vero
peaks_nodup_uniq_vero_infectedAll_rev_peak_3615	DLG1	11.84	4.28124	2.41245	intron	vero
peaks_nodup_uniq_vero_infectedAll_rev_peak_3617	NCBP2	12.54	3.91342	2.28299	intron	vero
peaks_nodup_uniq_vero_infectedAll_rev_peak_3618	SENP5	13.24	3.38979	1.85935	intron	vero
peaks_nodup_uniq_vero_infectedAll_rev_peak_3619a	SENP5	15.33	3.26544	1.99445	intron	vero
peaks_nodup_uniq_vero_infectedAll_rev_peak_3619b	SENP5	22.99	3.42725	3.35657	intron	vero
peaks_nodup_uniq_vero_infectedAll_rev_peak_3621	FBXO45	22.29	3.32773	3.35657	exon	vero
peaks_nodup_uniq_vero_infectedAll_rev_peak_3625	LOC103241997	9.75	5.37683	3.32156	exon	vero
peaks_nodup_uniq_vero_infectedAll_rev_peak_3626	LOC103241997	4.18	3.92435	1.46793	promoter-tss	vero
peaks_nodup_uniq_vero_infectedAll_rev_peak_3628	LOC103242007	4.18	4.33481	2.28299	tts	vero
peaks_nodup_uniq_vero_infectedAll_rev_peak_3629	LOC103242007	6.27	4.54388	2.12632	intergenic	vero
peaks_nodup_uniq_vero_infectedAll_rev_peak_3630	TNK2	4.18	4.33481	2.28299	intron	vero
peaks_nodup_uniq_vero_infectedAll_rev_peak_3635	LOC103242023	11.15	4.33823	2.80892	intron	vero
peaks_nodup_uniq_vero_infectedAll_rev_peak_3638	IQCG	4.18	4.04699	1.68794	intron	vero
peaks_nodup_uniq_vero_infectedAll_rev_peak_3639	IQCG	17.42	4.60431	4.57711	intron	vero
peaks_nodup_uniq_vero_infectedAll_rev_peak_3643	LOC103242069	11.15	3.79595	2.10817	intergenic	vero
peaks_nodup_uniq_vero_infectedAll_rev_peak_3644	LOC103242069	13.24	7.11856	7.04968	exon	vero
peaks_nodup_uniq_vero_infectedAll_rev_peak_3647	DOC2B	15.33	3.26544	1.99445	intergenic	vero
peaks_nodup_uniq_vero_infectedAll_rev_peak_3648	DOC2B	27.87	3.20751	3.80568	intergenic	vero
peaks_nodup_uniq_vero_infectedAll_rev_peak_3649	DOC2B	27.17	5.21684	8.75342	intergenic	vero
peaks_nodup_uniq_vero_infectedAll_rev_peak_3651a	LOC103242091	9.75	4.48069	2.25618	intron	vero
peaks_nodup_uniq_vero_infectedAll_rev_peak_3651b	LOC103242091	13.24	4.7457	3.80568	intron	vero
peaks_nodup_uniq_vero_infectedAll_rev_peak_3652	LOC103242091	17.42	6.13908	6.93709	intron	vero
peaks_nodup_uniq_vero_infectedAll_rev_peak_3654	LOC103242091	9.06	4.57135	2.72385	intron	vero
peaks_nodup_uniq_vero_infectedAll_rev_peak_3655	RPH3AL	16.02	8.51194	10.1754	intron	vero
peaks_nodup_uniq_vero_infectedAll_rev_peak_3661	LOC103242080	9.06	5.02849	3.32156	intron	vero
peaks_nodup_uniq_vero_infectedAll_rev_peak_3666	NXN	12.54	4.51347	3.09663	intron	vero
peaks_nodup_uniq_vero_infectedAll_rev_peak_3667	TIMM22	41.1	2.63154	4.27394	exon	vero
peaks_nodup_uniq_vero_infectedAll_rev_peak_3668	ABR	28.56	3.69554	5.34142	promoter-tss	vero
peaks_nodup_uniq_vero_infectedAll_rev_peak_3669	CRK	57.13	2.64221	6.41436	exon	vero
peaks_nodup_uniq_vero_infectedAll_rev_peak_3670	TLCD2	29.26	3.0261	3.82294	exon	vero
peaks_nodup_uniq_vero_infectedAll_rev_peak_3671	SMYD4	25.08	2.66131	2.28616	exon	vero
peaks_nodup_uniq_vero_infectedAll_rev_peak_3672	OVCA2	13.24	3.95475	2.6749	promoter-tss	vero
peaks_nodup_uniq_vero_infectedAll_rev_peak_3674	SMG6	8.36	4.68014	2.4688	intron	vero
peaks_nodup_uniq_vero_infectedAll_rev_peak_3675	SMG6	63.4	1.95148	2.85256	exon	vero
[truncated: 12,839 more rows]

## Sheet: Peaks B.1
name_macs2	peakAnn_gene_name	pileup_macs2	fold_enrichment_macs2	-log10(qvalue)_macs2	short_annotation	condition
peaks_nodup_uniq_B.1_infectedAll_fwd_peak_4	SIGIRR	3.96	4.73505	2.67066	promoter-tss	B.1
peaks_nodup_uniq_B.1_infectedAll_fwd_peak_11	LOC103235445	11.89	4.29654	2.04123	exon	B.1
peaks_nodup_uniq_B.1_infectedAll_fwd_peak_12	LOC103236414	21.3	3.18604	2.49777	promoter-tss	B.1
peaks_nodup_uniq_B.1_infectedAll_fwd_peak_13	LOC103236414	29.23	3.35874	4.32004	tts	B.1
peaks_nodup_uniq_B.1_infectedAll_fwd_peak_16	LOC103236414	12.39	4.46168	2.67743	intergenic	B.1
peaks_nodup_uniq_B.1_infectedAll_fwd_peak_17	LOC103236414	10.9	4.95784	2.62196	intergenic	B.1
peaks_nodup_uniq_B.1_infectedAll_fwd_peak_23	C1H11orf24	12.39	4.46168	2.67743	exon	B.1
peaks_nodup_uniq_B.1_infectedAll_fwd_peak_24	C1H11orf24	13.87	7.43562	6.5495	exon	B.1
peaks_nodup_uniq_B.1_infectedAll_fwd_peak_25a	SUV420H1	9.41	4.73301	2.35114	exon	B.1
peaks_nodup_uniq_B.1_infectedAll_fwd_peak_25c	SUV420H1	12.88	5.33863	3.60368	exon	B.1
peaks_nodup_uniq_B.1_infectedAll_fwd_peak_25d	SUV420H1	9.91	4.19539	1.46301	exon	B.1
peaks_nodup_uniq_B.1_infectedAll_fwd_peak_26	CHKA	18.33	4.20214	3.76479	exon	B.1
peaks_nodup_uniq_B.1_infectedAll_fwd_peak_33a	LOC103220516	19.32	4.06413	3.76479	exon	B.1
peaks_nodup_uniq_B.1_infectedAll_fwd_peak_37	SNX32	7.93	6.37601	3.73502	intron	B.1
peaks_nodup_uniq_B.1_infectedAll_fwd_peak_38	SNX32	5.45	4.60672	1.66867	promoter-tss	B.1
peaks_nodup_uniq_B.1_infectedAll_fwd_peak_39	LOC103225990	5.45	5.37451	3.02968	exon	B.1
peaks_nodup_uniq_B.1_infectedAll_fwd_peak_41	KAT5	3.47	4.26242	2.67066	intron	B.1
peaks_nodup_uniq_B.1_infectedAll_fwd_peak_44	MAP3K11	13.38	3.59396	1.7246	promoter-tss	B.1
peaks_nodup_uniq_B.1_infectedAll_fwd_peak_48	PLCB3	3.47	4.06164	1.68584	promoter-tss	B.1
peaks_nodup_uniq_B.1_infectedAll_fwd_peak_50	LOC103233499	7.43	5.26939	2.66879	intron	B.1
peaks_nodup_uniq_B.1_infectedAll_fwd_peak_54a	HNRNPUL2	24.27	2.52747	1.40249	exon	B.1
peaks_nodup_uniq_B.1_infectedAll_fwd_peak_54b	HNRNPUL2	29.23	2.69899	2.51308	exon	B.1
peaks_nodup_uniq_B.1_infectedAll_fwd_peak_57	EEF1G	16.84	4.26881	3.18906	exon	B.1
peaks_nodup_uniq_B.1_infectedAll_fwd_peak_59	FADS3	8.92	5.50957	2.72856	exon	B.1
peaks_nodup_uniq_B.1_infectedAll_fwd_peak_60	FADS2	10.4	3.80114	1.40639	intron	B.1
peaks_nodup_uniq_B.1_infectedAll_fwd_peak_63	LOC103234533	5.94	5.78734	3.02968	exon	B.1
peaks_nodup_uniq_B.1_infectedAll_fwd_peak_70	PRG2	3.96	4.73505	2.67066	exon	B.1
peaks_nodup_uniq_B.1_infectedAll_fwd_peak_73a	TNKS1BP1	24.77	2.57701	1.40249	exon	B.1
peaks_nodup_uniq_B.1_infectedAll_fwd_peak_73b	TNKS1BP1	42.6	2.0764	1.57294	exon	B.1
peaks_nodup_uniq_B.1_infectedAll_fwd_peak_74	TNKS1BP1	41.12	2.63239	3.84384	exon	B.1
peaks_nodup_uniq_B.1_infectedAll_fwd_peak_75	LOC103235530	6.44	5.31444	2.67066	intergenic	B.1
peaks_nodup_uniq_B.1_infectedAll_fwd_peak_77a	APLNR	4.95	4.96168	1.86202	intergenic	B.1
peaks_nodup_uniq_B.1_infectedAll_fwd_peak_77b	APLNR	4.46	4.47427	1.7109	intergenic	B.1
peaks_nodup_uniq_B.1_infectedAll_fwd_peak_79	AGBL2	15.85	4.21321	2.87436	intron	B.1
peaks_nodup_uniq_B.1_infectedAll_fwd_peak_81	SLC39A13	10.4	3.80114	1.40639	intron	B.1
peaks_nodup_uniq_B.1_infectedAll_fwd_peak_84	NR1H3	12.39	7.43613	6.57551	tts	B.1
peaks_nodup_uniq_B.1_infectedAll_fwd_peak_85	LOC103236314	5.94	4.96058	1.66867	intron	B.1
peaks_nodup_uniq_B.1_infectedAll_fwd_peak_87	AMBRA1	16.84	4.24849	3.15737	exon	B.1
peaks_nodup_uniq_B.1_infectedAll_fwd_peak_88a	CHRM4	9.41	4.00485	1.46301	exon	B.1
peaks_nodup_uniq_B.1_infectedAll_fwd_peak_88b	CHRM4	28.73	5.94665	9.75911	exon	B.1
peaks_nodup_uniq_B.1_infectedAll_fwd_peak_90	PHF21A	7.93	4.95912	1.89469	promoter-tss	B.1
peaks_nodup_uniq_B.1_infectedAll_fwd_peak_92	LOC103236590	29.23	10.0762	17.7069	tts	B.1
peaks_nodup_uniq_B.1_infectedAll_fwd_peak_93a	TP53I11	4.95	5.22282	2.49156	intron	B.1
peaks_nodup_uniq_B.1_infectedAll_fwd_peak_94	TP53I11	8.92	8.12887	6.73277	intron	B.1
peaks_nodup_uniq_B.1_infectedAll_fwd_peak_100	CD59	14.86	5.28734	4.12138	intron	B.1
peaks_nodup_uniq_B.1_infectedAll_fwd_peak_103	KIF18A	10.9	3.96627	1.40639	intron	B.1
peaks_nodup_uniq_B.1_infectedAll_fwd_peak_104	KIF18A	15.36	7.4352	7.5639	exon	B.1
peaks_nodup_uniq_B.1_infectedAll_fwd_peak_106	LOC103238535	3.47	4.21491	2.39042	intergenic	B.1
peaks_nodup_uniq_B.1_infectedAll_fwd_peak_107a	BDNF	10.4	5.70171	3.76479	exon	B.1
peaks_nodup_uniq_B.1_infectedAll_fwd_peak_107b	BDNF	7.93	4.95912	1.89469	exon	B.1
peaks_nodup_uniq_B.1_infectedAll_fwd_peak_109	CCDC34	29.72	5.12068	8.40704	intron	B.1
peaks_nodup_uniq_B.1_infectedAll_fwd_peak_112	LOC103239171	21.3	2.78778	1.63486	intron	B.1
peaks_nodup_uniq_B.1_infectedAll_fwd_peak_114	LOC103239114	7.93	6.37601	3.73502	intron	B.1
peaks_nodup_uniq_B.1_infectedAll_fwd_peak_115	LOC103239243	13.38	7.18791	6.5495	exon	B.1
peaks_nodup_uniq_B.1_infectedAll_fwd_peak_117	LOC103239593	34.18	2.51305	2.56334	exon	B.1
peaks_nodup_uniq_B.1_infectedAll_fwd_peak_118	LOC103239593	21.3	3.71704	3.56463	exon	B.1
peaks_nodup_uniq_B.1_infectedAll_fwd_peak_120	LOC103239605	4.46	5.20768	4.32004	intron	B.1
peaks_nodup_uniq_B.1_infectedAll_fwd_peak_122	LOC103239712	3.96	4.43144	1.42553	intron	B.1
peaks_nodup_uniq_B.1_infectedAll_fwd_peak_124	SOX6	3.47	4.13686	1.99324	intron	B.1
peaks_nodup_uniq_B.1_infectedAll_fwd_peak_125	LOC103239626	34.68	2.22988	1.4567	exon	B.1
peaks_nodup_uniq_B.1_infectedAll_fwd_peak_126	ARNTL	15.85	4.21321	2.87436	exon	B.1
peaks_nodup_uniq_B.1_infectedAll_fwd_peak_129	SBF2	6.44	5.31444	2.67066	intron	B.1
peaks_nodup_uniq_B.1_infectedAll_fwd_peak_137	RRP8	12.39	3.93677	2.0074	exon	B.1
peaks_nodup_uniq_B.1_infectedAll_fwd_peak_138	ARFIP2	8.42	4.71091	2.09477	promoter-tss	B.1
peaks_nodup_uniq_B.1_infectedAll_fwd_peak_139	TRIM3	9.91	4.95819	2.35114	exon	B.1
peaks_nodup_uniq_B.1_infectedAll_fwd_peak_140	APBB1	14.86	3.96551	2.30038	exon	B.1
peaks_nodup_uniq_B.1_infectedAll_fwd_peak_145	TRIM21	7.43	4.21551	1.33247	exon	B.1
peaks_nodup_uniq_B.1_infectedAll_fwd_peak_154	PPME1	13.38	4.49245	2.96867	promoter-tss	B.1
peaks_nodup_uniq_B.1_infectedAll_fwd_peak_158	RNF169	15.36	8.17872	8.51948	intron	B.1
peaks_nodup_uniq_B.1_infectedAll_fwd_peak_159	LOC103248042	16.35	4.33706	3.49873	exon	B.1
peaks_nodup_uniq_B.1_infectedAll_fwd_peak_163	WNT11	13.87	3.71781	1.7246	exon	B.1
peaks_nodup_uniq_B.1_infectedAll_fwd_peak_164	WNT11	27.74	2.61295	1.86202	exon	B.1
peaks_nodup_uniq_B.1_infectedAll_fwd_peak_166a	C1H11orf30	10.4	5.70171	3.76479	exon	B.1
peaks_nodup_uniq_B.1_infectedAll_fwd_peak_166b	C1H11orf30	9.41	5.20631	2.89974	exon	B.1
peaks_nodup_uniq_B.1_infectedAll_fwd_peak_168	LOC103248083	5.94	6.62556	6.06467	intergenic	B.1
peaks_nodup_uniq_B.1_infectedAll_fwd_peak_176	AAMDC	4.46	4.4021	1.57294	promoter-tss	B.1
peaks_nodup_uniq_B.1_infectedAll_fwd_peak_178	USP35	22.29	11.6465	16.4676	exon	B.1
peaks_nodup_uniq_B.1_infectedAll_fwd_peak_179	PCF11	54.49	1.91359	1.66624	exon	B.1
peaks_nodup_uniq_B.1_infectedAll_fwd_peak_180	CCDC90B	11.39	6.19711	4.65099	intron	B.1
peaks_nodup_uniq_B.1_infectedAll_fwd_peak_182	LOC103248152	5.94	4.96058	1.66867	tts	B.1
peaks_nodup_uniq_B.1_infectedAll_fwd_peak_183	DLG2	4.46	5.20768	4.32004	intron	B.1
peaks_nodup_uniq_B.1_infectedAll_fwd_peak_186	CHORDC1	11.89	4.29654	2.04123	intergenic	B.1
peaks_nodup_uniq_B.1_infectedAll_fwd_peak_188	TAF1D	5.45	5.37451	3.02968	exon	B.1
peaks_nodup_uniq_B.1_infectedAll_fwd_peak_190a	LOC103248256	27.74	2.87425	2.59557	exon	B.1
peaks_nodup_uniq_B.1_infectedAll_fwd_peak_191	LOC103248256	15.36	5.45248	4.83639	intron	B.1
peaks_nodup_uniq_B.1_infectedAll_fwd_peak_192	LOC103248928	31.71	3.63396	5.33946	exon	B.1
peaks_nodup_uniq_B.1_infectedAll_fwd_peak_195	CEP57	6.44	4.3766	1.39258	intron	B.1
peaks_nodup_uniq_B.1_infectedAll_fwd_peak_196	LOC103248281	32.2	4.74301	8.5641	intron	B.1
peaks_nodup_uniq_B.1_infectedAll_fwd_peak_201	YAP1	5.45	5.65738	3.79536	intron	B.1
peaks_nodup_uniq_B.1_infectedAll_fwd_peak_203	BIRC2	10.4	5.70171	3.76479	exon	B.1
peaks_nodup_uniq_B.1_infectedAll_fwd_peak_206	LOC103248379	4.46	5.20768	4.32004	intron	B.1
peaks_nodup_uniq_B.1_infectedAll_fwd_peak_208	ACAT1	12.88	4.62681	2.67743	intron	B.1
peaks_nodup_uniq_B.1_infectedAll_fwd_peak_210	DDX10	4.46	4.4021	1.57294	intron	B.1
peaks_nodup_uniq_B.1_infectedAll_fwd_peak_211	DDX10	51.52	2.50103	4.36182	exon	B.1
peaks_nodup_uniq_B.1_infectedAll_fwd_peak_212	LOC103248409	19.82	10.408	12.8958	intron	B.1
peaks_nodup_uniq_B.1_infectedAll_fwd_peak_214	ZC3H12C	11.89	3.79107	1.40639	exon	B.1
peaks_nodup_uniq_B.1_infectedAll_fwd_peak_215	BTG4	28.24	4.87298	7.74419	exon	B.1
peaks_nodup_uniq_B.1_infectedAll_fwd_peak_216a	C1H11orf57	21.8	3.79961	3.56463	exon	B.1
peaks_nodup_uniq_B.1_infectedAll_fwd_peak_216b	C1H11orf57	23.28	4.85677	6.26253	exon	B.1
peaks_nodup_uniq_B.1_infectedAll_fwd_peak_217	PLET1	5.45	5.97168	4.9662	intron	B.1
peaks_nodup_uniq_B.1_infectedAll_fwd_peak_220	NCAM1	37.16	2.93501	4.38372	intron	B.1
peaks_nodup_uniq_B.1_infectedAll_fwd_peak_224	LOC103248484	35.17	2.78258	3.58735	intron	B.1
peaks_nodup_uniq_B.1_infectedAll_fwd_peak_225	RBM7	8.92	4.95861	2.09477	exon	B.1
peaks_nodup_uniq_B.1_infectedAll_fwd_peak_228	APOA1	3.96	4.73505	2.67066	exon	B.1
peaks_nodup_uniq_B.1_infectedAll_fwd_peak_231	CEP164	5.45	4.60672	1.66867	exon	B.1
peaks_nodup_uniq_B.1_infectedAll_fwd_peak_234	TTC36	30.22	3.80725	5.71828	intron	B.1
peaks_nodup_uniq_B.1_infectedAll_fwd_peak_236	TTC36	19.32	3.1751	2.10175	exon	B.1
peaks_nodup_uniq_B.1_infectedAll_fwd_peak_239	PHLDB1	17.83	4.70861	4.14794	intron	B.1
peaks_nodup_uniq_B.1_infectedAll_fwd_peak_240	TREH	23.28	4.04731	4.65919	intron	B.1
peaks_nodup_uniq_B.1_infectedAll_fwd_peak_245	NLRX1	4.46	4.33223	1.42254	promoter-tss	B.1
peaks_nodup_uniq_B.1_infectedAll_fwd_peak_247	RNF26	10.9	4.95784	2.62196	exon	B.1
peaks_nodup_uniq_B.1_infectedAll_fwd_peak_250	ARHGEF12	26.26	3.02847	2.92636	exon	B.1
peaks_nodup_uniq_B.1_infectedAll_fwd_peak_251	ARHGEF12	20.31	3.55191	3.02126	intron	B.1
peaks_nodup_uniq_B.1_infectedAll_fwd_peak_253	LOC103248667	3.47	4.06164	1.68584	exon	B.1
peaks_nodup_uniq_B.1_infectedAll_fwd_peak_259	SRPR	10.9	5.94941	3.76479	tts	B.1
peaks_nodup_uniq_B.1_infectedAll_fwd_peak_261	LOC103248790	4.95	4.96168	1.86202	tts	B.1
peaks_nodup_uniq_B.1_infectedAll_fwd_peak_266	LOC103248871	4.46	5.20768	4.32004	intron	B.1
peaks_nodup_uniq_B.1_infectedAll_fwd_peak_267	LOC103248892	5.94	5.78734	3.02968	exon	B.1
peaks_nodup_uniq_B.1_infectedAll_fwd_peak_273	LOC103216854	3.47	4.06164	1.68584	tts	B.1
peaks_nodup_uniq_B.1_infectedAll_fwd_peak_274	LOC103216854	5.45	6.15293	6.06467	exon	B.1
peaks_nodup_uniq_B.1_infectedAll_fwd_peak_277	HS6ST1	7.93	4.46321	1.33247	exon	B.1
peaks_nodup_uniq_B.1_infectedAll_fwd_peak_278	HS6ST1	7.93	4.95912	1.89469	exon	B.1
peaks_nodup_uniq_B.1_infectedAll_fwd_peak_281	AMMECR1L	12.39	4.46168	2.67743	intron	B.1
peaks_nodup_uniq_B.1_infectedAll_fwd_peak_284	POLR2D	18.33	5.3694	5.65582	exon	B.1
peaks_nodup_uniq_B.1_infectedAll_fwd_peak_285	POLR2D	11.89	4.95755	2.8478	exon	B.1
peaks_nodup_uniq_B.1_infectedAll_fwd_peak_287	LOC103217007	8.42	4.71091	2.09477	exon	B.1
peaks_nodup_uniq_B.1_infectedAll_fwd_peak_289	SFT2D3	19.32	3.38677	2.54555	exon	B.1
peaks_nodup_uniq_B.1_infectedAll_fwd_peak_290	SFT2D3	40.13	2.1646	1.86202	exon	B.1
peaks_nodup_uniq_B.1_infectedAll_fwd_peak_292	PROC	3.47	3.98911	1.42553	intergenic	B.1
peaks_nodup_uniq_B.1_infectedAll_fwd_peak_293a	LOC103216885	7.43	5.26939	2.66879	intergenic	B.1
peaks_nodup_uniq_B.1_infectedAll_fwd_peak_295	NIFK	15.36	3.27149	1.6067	intron	B.1
peaks_nodup_uniq_B.1_infectedAll_fwd_peak_298	CLASP1	3.96	4.51201	1.68584	intron	B.1
peaks_nodup_uniq_B.1_infectedAll_fwd_peak_300	TFCP2L1	7.93	6.37601	3.73502	intergenic	B.1
peaks_nodup_uniq_B.1_infectedAll_fwd_peak_302a	LOC103216922	8.42	4.71091	2.09477	intron	B.1
peaks_nodup_uniq_B.1_infectedAll_fwd_peak_302b	LOC103216922	9.41	7.43759	6.02233	intron	B.1
peaks_nodup_uniq_B.1_infectedAll_fwd_peak_305	MGAT5	9.41	8.26398	7.55213	intron	B.1
peaks_nodup_uniq_B.1_infectedAll_fwd_peak_308	CCNT2	15.85	4.21321	2.87436	intron	B.1
peaks_nodup_uniq_B.1_infectedAll_fwd_peak_309a	CCNT2	25.76	3.34511	3.39781	exon	B.1
peaks_nodup_uniq_B.1_infectedAll_fwd_peak_309b	CCNT2	18.33	3.5796	2.67066	exon	B.1
peaks_nodup_uniq_B.1_infectedAll_fwd_peak_309c	CCNT2	17.83	3.92384	2.89209	exon	B.1
peaks_nodup_uniq_B.1_infectedAll_fwd_peak_312	RAB3GAP1	21.3	4.84831	5.67669	exon	B.1
peaks_nodup_uniq_B.1_infectedAll_fwd_peak_314	UBXN4	22.29	2.91163	2.04217	intron	B.1
peaks_nodup_uniq_B.1_infectedAll_fwd_peak_316	GTDC1	5.94	6.62556	6.06467	exon	B.1
peaks_nodup_uniq_B.1_infectedAll_fwd_peak_317	ORC4	17.34	4.58476	4.14794	exon	B.1
peaks_nodup_uniq_B.1_infectedAll_fwd_peak_318	MBD5	5.45	5.2864	2.8613	intron	B.1
peaks_nodup_uniq_B.1_infectedAll_fwd_peak_323	LOC103217057	16.35	3.46965	2.09477	intron	B.1
peaks_nodup_uniq_B.1_infectedAll_fwd_peak_324	TNFAIP6	5.45	4.60672	1.66867	promoter-tss	B.1
peaks_nodup_uniq_B.1_infectedAll_fwd_peak_326	RIF1	16.35	8.67412	9.61251	exon	B.1
peaks_nodup_uniq_B.1_infectedAll_fwd_peak_330	RIF1	7.93	6.37601	3.73502	exon	B.1
peaks_nodup_uniq_B.1_infectedAll_fwd_peak_333	LOC103217092	15.85	4.21321	2.87436	intron	B.1
peaks_nodup_uniq_B.1_infectedAll_fwd_peak_337	PKP4	3.47	4.26242	2.67066	intron	B.1
peaks_nodup_uniq_B.1_infectedAll_fwd_peak_339	LOC103217144	15.36	4.08936	2.87436	tts	B.1
peaks_nodup_uniq_B.1_infectedAll_fwd_peak_340	LOC103217155	17.83	5.23179	4.91441	exon	B.1
peaks_nodup_uniq_B.1_infectedAll_fwd_peak_342	MARCH7	24.27	4.21244	5.26669	exon	B.1
peaks_nodup_uniq_B.1_infectedAll_fwd_peak_346	LOC103217177	11.39	7.74639	6.74379	exon	B.1
peaks_nodup_uniq_B.1_infectedAll_fwd_peak_349b	LOC103217222	12.88	7.71135	6.57551	exon	B.1
peaks_nodup_uniq_B.1_infectedAll_fwd_peak_350	CERS6	9.41	5.20631	2.89974	intergenic	B.1
peaks_nodup_uniq_B.1_infectedAll_fwd_peak_351	LOC103217274	19.32	4.06413	3.76479	intron	B.1
peaks_nodup_uniq_B.1_infectedAll_fwd_peak_352a	LOC103217274	41.12	3.82894	8.26134	exon	B.1
peaks_nodup_uniq_B.1_infectedAll_fwd_peak_352b	LOC103217274	44.09	2.37319	3.09787	exon	B.1
peaks_nodup_uniq_B.1_infectedAll_fwd_peak_353	KLHL23	5.45	5.37451	3.02968	exon	B.1
peaks_nodup_uniq_B.1_infectedAll_fwd_peak_355	UBR3	9.91	6.81751	4.60775	intron	B.1
peaks_nodup_uniq_B.1_infectedAll_fwd_peak_358	LOC103217323	4.46	4.78825	2.49156	tts	B.1
peaks_nodup_uniq_B.1_infectedAll_fwd_peak_359	RAPGEF4	4.46	5.20768	4.32004	intron	B.1
peaks_nodup_uniq_B.1_infectedAll_fwd_peak_361a	LOC103217333	22.79	2.97356	2.04217	exon	B.1
peaks_nodup_uniq_B.1_infectedAll_fwd_peak_361b	LOC103217333	33.69	2.89061	3.51142	exon	B.1
peaks_nodup_uniq_B.1_infectedAll_fwd_peak_363	HOXD9	7.93	4.46321	1.33247	exon	B.1
peaks_nodup_uniq_B.1_infectedAll_fwd_peak_366	HOXD8	5.45	5.11858	2.54682	intergenic	B.1
peaks_nodup_uniq_B.1_infectedAll_fwd_peak_369	LOC103217433	6.44	5.31444	2.67066	intron	B.1
peaks_nodup_uniq_B.1_infectedAll_fwd_peak_371	LOC103217442	5.45	4.88592	2.09477	intron	B.1
peaks_nodup_uniq_B.1_infectedAll_fwd_peak_375	LOC103217459	14.37	5.48808	4.60825	intron	B.1
peaks_nodup_uniq_B.1_infectedAll_fwd_peak_376	FAM171B	14.86	4.6653	3.26229	exon	B.1
peaks_nodup_uniq_B.1_infectedAll_fwd_peak_378	FAM171B	21.3	3.71704	3.56463	exon	B.1
peaks_nodup_uniq_B.1_infectedAll_fwd_peak_379	GULP1	7.93	4.46321	1.33247	intron	B.1
peaks_nodup_uniq_B.1_infectedAll_fwd_peak_382	ASNSD1	8.42	4.71091	2.09477	exon	B.1
peaks_nodup_uniq_B.1_infectedAll_fwd_peak_384	INPP1	3.96	4.73505	2.67066	exon	B.1
peaks_nodup_uniq_B.1_infectedAll_fwd_peak_390	SLC39A10	30.22	2.83813	3.02707	exon	B.1
peaks_nodup_uniq_B.1_infectedAll_fwd_peak_392	PLCL1	7.93	6.37601	3.73502	intron	B.1
peaks_nodup_uniq_B.1_infectedAll_fwd_peak_395	LOC103217611	8.42	6.72987	4.82758	exon	B.1
peaks_nodup_uniq_B.1_infectedAll_fwd_peak_403	LOC103217636	11.39	6.19711	4.65099	intron	B.1
peaks_nodup_uniq_B.1_infectedAll_fwd_peak_405	FZD7	14.86	3.96551	2.30038	exon	B.1
peaks_nodup_uniq_B.1_infectedAll_fwd_peak_406	FAM117B	31.71	3.27057	4.32004	exon	B.1
peaks_nodup_uniq_B.1_infectedAll_fwd_peak_408	FAM117B	13.87	4.95708	3.38877	exon	B.1
peaks_nodup_uniq_B.1_infectedAll_fwd_peak_409	ICA1L	6.44	5.31444	2.67066	exon	B.1
peaks_nodup_uniq_B.1_infectedAll_fwd_peak_411	ABI2	4.46	5.05427	3.44109	exon	B.1
peaks_nodup_uniq_B.1_infectedAll_fwd_peak_412	PARD3B	3.47	4.26242	2.67066	promoter-tss	B.1
peaks_nodup_uniq_B.1_infectedAll_fwd_peak_419	PTH2R	9.91	6.81751	4.60775	exon	B.1
peaks_nodup_uniq_B.1_infectedAll_fwd_peak_420	TMEM169	3.47	4.26242	2.67066	intron	B.1
peaks_nodup_uniq_B.1_infectedAll_fwd_peak_421	SMARCAL1	13.38	4.79194	3.38877	exon	B.1
peaks_nodup_uniq_B.1_infectedAll_fwd_peak_424	PNKD	9.41	5.20631	2.89974	intron	B.1
peaks_nodup_uniq_B.1_infectedAll_fwd_peak_426	PLCD4	3.47	4.26242	2.67066	intron	B.1
peaks_nodup_uniq_B.1_infectedAll_fwd_peak_427	ANKZF1	15.36	3.27149	1.6067	exon	B.1
peaks_nodup_uniq_B.1_infectedAll_fwd_peak_429	SPEG	6.44	4.65013	1.73039	exon	B.1
peaks_nodup_uniq_B.1_infectedAll_fwd_peak_432	STK11IP	21.8	11.3988	15.2415	exon	B.1
peaks_nodup_uniq_B.1_infectedAll_fwd_peak_433	SLC4A3	7.43	4.21551	1.33247	intron	B.1
peaks_nodup_uniq_B.1_infectedAll_fwd_peak_435	ACSL3	8.42	6.8274	4.98697	intron	B.1
peaks_nodup_uniq_B.1_infectedAll_fwd_peak_436	LOC103217944	11.39	6.19711	4.65099	intron	B.1
peaks_nodup_uniq_B.1_infectedAll_fwd_peak_438	MRPL44	8.92	7.74783	5.98346	intron	B.1
peaks_nodup_uniq_B.1_infectedAll_fwd_peak_441	IRS1	6.44	6.20018	4.32004	intergenic	B.1
peaks_nodup_uniq_B.1_infectedAll_fwd_peak_447	SP100	4.95	4.96168	1.86202	intron	B.1
peaks_nodup_uniq_B.1_infectedAll_fwd_peak_450	SP100	8.92	7.08373	4.82758	intron	B.1
peaks_nodup_uniq_B.1_infectedAll_fwd_peak_451	LOC103218039	14.37	5.91024	5.18415	exon	B.1
peaks_nodup_uniq_B.1_infectedAll_fwd_peak_452	CAB39	15.85	3.37057	1.6067	exon	B.1
peaks_nodup_uniq_B.1_infectedAll_fwd_peak_453	ITM2C	5.45	5.0386	2.38787	intron	B.1
peaks_nodup_uniq_B.1_infectedAll_fwd_peak_454	PSMD1	13.38	4.79194	3.38877	promoter-tss	B.1
peaks_nodup_uniq_B.1_infectedAll_fwd_peak_457	LOC103218071	4.46	4.54884	1.86202	exon	B.1
peaks_nodup_uniq_B.1_infectedAll_fwd_peak_464	ARL4C	4.46	5.20768	4.32004	intergenic	B.1
peaks_nodup_uniq_B.1_infectedAll_fwd_peak_465	ARL4C	7.43	8.04344	9.75911	intergenic	B.1
peaks_nodup_uniq_B.1_infectedAll_fwd_peak_466	LOC103218132	3.47	3.98911	1.42553	intron	B.1
peaks_nodup_uniq_B.1_infectedAll_fwd_peak_469a	LOC103218336	3.96	4.68227	2.39042	exon	B.1
peaks_nodup_uniq_B.1_infectedAll_fwd_peak_469b	LOC103218336	4.95	4.96168	1.86202	exon	B.1
peaks_nodup_uniq_B.1_infectedAll_fwd_peak_472	RBM44	23.28	3.03548	2.49806	exon	B.1
peaks_nodup_uniq_B.1_infectedAll_fwd_peak_473	LOC103218166	11.89	4.95755	2.8478	tts	B.1
peaks_nodup_uniq_B.1_infectedAll_fwd_peak_475	LOC103218175	3.47	4.13686	1.99324	tts	B.1
peaks_nodup_uniq_B.1_infectedAll_fwd_peak_476	TRAF3IP1	36.66	3.13831	4.79513	exon	B.1
peaks_nodup_uniq_B.1_infectedAll_fwd_peak_478	ASB1	9.41	7.43759	6.02233	exon	B.1
peaks_nodup_uniq_B.1_infectedAll_fwd_peak_482	PPP1R7	19.82	6.93868	8.0838	intron	B.1
peaks_nodup_uniq_B.1_infectedAll_fwd_peak_486a	RTP5	3.47	4.06164	1.68584	intergenic	B.1
peaks_nodup_uniq_B.1_infectedAll_fwd_peak_486b	RTP5	5.94	4.96058	1.66867	intergenic	B.1
peaks_nodup_uniq_B.1_infectedAll_fwd_peak_487	RTP5	12.39	8.36564	7.86778	intergenic	B.1
peaks_nodup_uniq_B.1_infectedAll_fwd_peak_488	LOC103218340	3.96	4.73505	2.67066	intergenic	B.1
peaks_nodup_uniq_B.1_infectedAll_fwd_peak_489	LOC103218361	26.75	2.77517	2.15611	promoter-tss	B.1
peaks_nodup_uniq_B.1_infectedAll_fwd_peak_491	RAD52	18.33	3.71728	2.91224	exon	B.1
peaks_nodup_uniq_B.1_infectedAll_fwd_peak_492	RAD52	8.92	4.50783	1.6067	exon	B.1
peaks_nodup_uniq_B.1_infectedAll_fwd_peak_493	ERC1	27.25	3.13856	3.38877	exon	B.1
peaks_nodup_uniq_B.1_infectedAll_fwd_peak_495	LOC103218366	7.93	4.46321	1.33247	intron	B.1
peaks_nodup_uniq_B.1_infectedAll_fwd_peak_496	LOC103218366	15.36	5.1117	4.36182	exon	B.1
peaks_nodup_uniq_B.1_infectedAll_fwd_peak_499	LOC103218373	12.88	4.62681	2.67743	exon	B.1
peaks_nodup_uniq_B.1_infectedAll_fwd_peak_503	LOC103218395	7.43	5.26939	2.66879	exon	B.1
peaks_nodup_uniq_B.1_infectedAll_fwd_peak_504	LOC103218412	12.39	6.69251	5.61698	intron	B.1
peaks_nodup_uniq_B.1_infectedAll_fwd_peak_513	PTPN6	16.84	4.46091	3.49873	intron	B.1
peaks_nodup_uniq_B.1_infectedAll_fwd_peak_514	C1S	7.43	4.21551	1.33247	exon	B.1
peaks_nodup_uniq_B.1_infectedAll_fwd_peak_515	LOC103218499	9.91	6.81751	4.60775	exon	B.1
peaks_nodup_uniq_B.1_infectedAll_fwd_peak_518	C3AR1	3.96	4.59556	1.99324	intergenic	B.1
peaks_nodup_uniq_B.1_infectedAll_fwd_peak_521	LOC103218621	22.29	3.32758	2.93725	exon	B.1
peaks_nodup_uniq_B.1_infectedAll_fwd_peak_522	LOC103218623	4.46	4.78825	2.49156	exon	B.1
peaks_nodup_uniq_B.1_infectedAll_fwd_peak_523	LOC103218623	6.94	5.6683	2.67066	intergenic	B.1
peaks_nodup_uniq_B.1_infectedAll_fwd_peak_528	BCL2L14	3.47	4.26242	2.67066	intergenic	B.1
peaks_nodup_uniq_B.1_infectedAll_fwd_peak_533	GPRC5D	12.88	8.67527	7.86778	exon	B.1
peaks_nodup_uniq_B.1_infectedAll_fwd_peak_535	ATF7IP	19.32	3.50356	2.72545	exon	B.1
peaks_nodup_uniq_B.1_infectedAll_fwd_peak_536	ATF7IP	6.94	5.6683	2.67066	intron	B.1
peaks_nodup_uniq_B.1_infectedAll_fwd_peak_537	ATF7IP	5.45	4.67349	1.76256	intron	B.1
peaks_nodup_uniq_B.1_infectedAll_fwd_peak_538	ATF7IP	3.47	3.98911	1.42553	intron	B.1
peaks_nodup_uniq_B.1_infectedAll_fwd_peak_540	PLEKHA5	5.45	4.60672	1.66867	intron	B.1
peaks_nodup_uniq_B.1_infectedAll_fwd_peak_542	LOC103218716	8.42	4.71091	2.09477	exon	B.1
peaks_nodup_uniq_B.1_infectedAll_fwd_peak_543a	AEBP2	40.13	2.05637	1.41726	promoter-tss	B.1
peaks_nodup_uniq_B.1_infectedAll_fwd_peak_544	AEBP2	19.82	4.16321	3.76479	intron	B.1
peaks_nodup_uniq_B.1_infectedAll_fwd_peak_546	ETNK1	6.44	6.88909	6.60201	intergenic	B.1
peaks_nodup_uniq_B.1_infectedAll_fwd_peak_547	SSPN	8.92	4.95861	2.09477	intron	B.1
peaks_nodup_uniq_B.1_infectedAll_fwd_peak_548a	SSPN	34.18	2.51305	2.56334	exon	B.1
peaks_nodup_uniq_B.1_infectedAll_fwd_peak_548b	SSPN	46.57	2.26513	2.71341	exon	B.1
peaks_nodup_uniq_B.1_infectedAll_fwd_peak_550	ITPR2	3.96	4.73505	2.67066	promoter-tss	B.1
peaks_nodup_uniq_B.1_infectedAll_fwd_peak_553	LOC103218783	4.46	4.54884	1.86202	intron	B.1
peaks_nodup_uniq_B.1_infectedAll_fwd_peak_556	LOC103218820	3.47	3.98911	1.42553	promoter-tss	B.1
peaks_nodup_uniq_B.1_infectedAll_fwd_peak_558	KIAA1551	6.44	4.65013	1.73039	exon	B.1
peaks_nodup_uniq_B.1_infectedAll_fwd_peak_559	FGD4	9.91	6.81751	4.60775	intron	B.1
peaks_nodup_uniq_B.1_infectedAll_fwd_peak_560a	FGD4	13.87	4.95708	3.38877	exon	B.1
peaks_nodup_uniq_B.1_infectedAll_fwd_peak_560b	FGD4	11.39	4.42651	2.43186	exon	B.1
peaks_nodup_uniq_B.1_infectedAll_fwd_peak_562	FGD4	6.44	7.09818	7.86778	exon	B.1
peaks_nodup_uniq_B.1_infectedAll_fwd_peak_563	FGD4	4.95	4.96168	1.86202	tts	B.1
peaks_nodup_uniq_B.1_infectedAll_fwd_peak_564	DNM1L	10.9	4.57647	2.13121	exon	B.1
peaks_nodup_uniq_B.1_infectedAll_fwd_peak_569	ARID2	7.43	4.21551	1.33247	intron	B.1
peaks_nodup_uniq_B.1_infectedAll_fwd_peak_571	SCAF11	22.79	3.71695	3.61681	exon	B.1
peaks_nodup_uniq_B.1_infectedAll_fwd_peak_572b	SCAF11	11.39	3.8732	1.7109	exon	B.1
peaks_nodup_uniq_B.1_infectedAll_fwd_peak_573	CACNB3	6.44	5.31444	2.67066	exon	B.1
peaks_nodup_uniq_B.1_infectedAll_fwd_peak_575	PRPH	5.94	6.62556	6.06467	intergenic	B.1
peaks_nodup_uniq_B.1_infectedAll_fwd_peak_576	TROAP	6.44	6.88909	6.60201	intergenic	B.1
peaks_nodup_uniq_B.1_infectedAll_fwd_peak_578	SPATS2	7.93	4.95912	1.89469	intron	B.1
peaks_nodup_uniq_B.1_infectedAll_fwd_peak_579	PRPF40B	12.39	4.46168	2.67743	tts	B.1
peaks_nodup_uniq_B.1_infectedAll_fwd_peak_582	LOC103238308	11.39	4.13141	2.04123	exon	B.1
peaks_nodup_uniq_B.1_infectedAll_fwd_peak_584	LOC103238325	3.96	4.51201	1.68584	intron	B.1
peaks_nodup_uniq_B.1_infectedAll_fwd_peak_588a	NR4A1	30.71	2.64291	2.34895	exon	B.1
peaks_nodup_uniq_B.1_infectedAll_fwd_peak_588b	NR4A1	28.73	2.39784	1.38679	exon	B.1
peaks_nodup_uniq_B.1_infectedAll_fwd_peak_589	NR4A1	25.76	4.18138	5.28035	exon	B.1
peaks_nodup_uniq_B.1_infectedAll_fwd_peak_591	LOC103238345	3.47	4.26242	2.67066	intron	B.1
peaks_nodup_uniq_B.1_infectedAll_fwd_peak_594	HOXC9	21.3	11.1511	15.2415	exon	B.1
peaks_nodup_uniq_B.1_infectedAll_fwd_peak_595	HOXC8	10.9	9.91569	9.92214	exon	B.1
peaks_nodup_uniq_B.1_infectedAll_fwd_peak_596	HOXC6	4.95	4.96168	1.86202	exon	B.1
peaks_nodup_uniq_B.1_infectedAll_fwd_peak_597	LOC103238421	9.41	5.20631	2.89974	exon	B.1
peaks_nodup_uniq_B.1_infectedAll_fwd_peak_598	LOC103238428	23.28	6.07096	8.43224	intergenic	B.1
peaks_nodup_uniq_B.1_infectedAll_fwd_peak_599	NFE2	3.47	4.13686	1.99324	intron	B.1
peaks_nodup_uniq_B.1_infectedAll_fwd_peak_600	LOC103238433	16.35	4.33706	3.49873	intergenic	B.1
peaks_nodup_uniq_B.1_infectedAll_fwd_peak_601	LOC103238484	15.85	5.61761	4.83639	tts	B.1
peaks_nodup_uniq_B.1_infectedAll_fwd_peak_602	GDF11	11.89	10.7414	11.5029	exon	B.1
peaks_nodup_uniq_B.1_infectedAll_fwd_peak_603	ORMDL2	4.95	5.41274	3.02968	promoter-tss	B.1
peaks_nodup_uniq_B.1_infectedAll_fwd_peak_604	RAB5B	7.93	4.69811	1.61026	intron	B.1
peaks_nodup_uniq_B.1_infectedAll_fwd_peak_605	IKZF4	4.95	4.80162	1.57294	intron	B.1
peaks_nodup_uniq_B.1_infectedAll_fwd_peak_606	MYL6	19.32	2.90295	1.58946	tts	B.1
peaks_nodup_uniq_B.1_infectedAll_fwd_peak_613	AGAP2	15.36	6.8156	6.72381	intron	B.1
peaks_nodup_uniq_B.1_infectedAll_fwd_peak_616	MON2	21.3	7.43408	9.83165	exon	B.1
peaks_nodup_uniq_B.1_infectedAll_fwd_peak_621	LOC103238636	3.47	4.21491	2.39042	intron	B.1
peaks_nodup_uniq_B.1_infectedAll_fwd_peak_623	LEMD3	23.28	3.03548	2.49806	exon	B.1
peaks_nodup_uniq_B.1_infectedAll_fwd_peak_626	LOC103238654	5.45	4.60672	1.66867	exon	B.1
peaks_nodup_uniq_B.1_infectedAll_fwd_peak_631	DYRK2	16.35	5.78275	5.64899	exon	B.1
peaks_nodup_uniq_B.1_infectedAll_fwd_peak_633	LOC103238689	28.73	3.3037	3.85366	exon	B.1
peaks_nodup_uniq_B.1_infectedAll_fwd_peak_634	LOC103238689	33.69	4.33591	7.67081	exon	B.1
peaks_nodup_uniq_B.1_infectedAll_fwd_peak_636	FRS2	5.45	5.55984	3.52315	intron	B.1
peaks_nodup_uniq_B.1_infectedAll_fwd_peak_642	CNOT2	14.37	7.68332	7.55213	intron	B.1
peaks_nodup_uniq_B.1_infectedAll_fwd_peak_643	KCNMB4	9.41	5.20631	2.89974	exon	B.1
peaks_nodup_uniq_B.1_infectedAll_fwd_peak_644	KCNMB4	7.43	5.26939	2.66879	promoter-tss	B.1
peaks_nodup_uniq_B.1_infectedAll_fwd_peak_645	THAP2	11.39	3.64536	1.40639	exon	B.1
peaks_nodup_uniq_B.1_infectedAll_fwd_peak_650	CSRP2	9.91	4.54501	1.86202	exon	B.1
peaks_nodup_uniq_B.1_infectedAll_fwd_peak_653	NAV3	33.69	2.47766	2.18304	exon	B.1
peaks_nodup_uniq_B.1_infectedAll_fwd_peak_659	LRRIQ1	12.39	4.46168	2.67743	exon	B.1
peaks_nodup_uniq_B.1_infectedAll_fwd_peak_660	ALX1	6.94	5.6683	2.67066	exon	B.1
peaks_nodup_uniq_B.1_infectedAll_fwd_peak_661	ALX1	4.46	5.20768	4.32004	exon	B.1
peaks_nodup_uniq_B.1_infectedAll_fwd_peak_662b	TMTC3	19.32	6.77355	8.0838	exon	B.1
peaks_nodup_uniq_B.1_infectedAll_fwd_peak_666	VEZT	12.39	6.69251	5.61698	intron	B.1
peaks_nodup_uniq_B.1_infectedAll_fwd_peak_667a	VEZT	15.36	8.17872	8.51948	tts	B.1
peaks_nodup_uniq_B.1_infectedAll_fwd_peak_667b	VEZT	15.36	6.29132	6.02691	tts	B.1
peaks_nodup_uniq_B.1_infectedAll_fwd_peak_669	NEDD1	15.36	8.17872	8.51948	exon	B.1
peaks_nodup_uniq_B.1_infectedAll_fwd_peak_672	ACTR6	4.46	4.7057	2.25057	intron	B.1
peaks_nodup_uniq_B.1_infectedAll_fwd_peak_673	SCYL2	12.39	4.78037	3.09787	promoter-tss	B.1
peaks_nodup_uniq_B.1_infectedAll_fwd_peak_675a	SLC17A8	20.81	3.51723	2.79765	exon	B.1
peaks_nodup_uniq_B.1_infectedAll_fwd_peak_675b	SLC17A8	20.31	3.13404	2.20285	exon	B.1
peaks_nodup_uniq_B.1_infectedAll_fwd_peak_676	SLC17A8	14.37	10.9762	12.4478	intergenic	B.1
peaks_nodup_uniq_B.1_infectedAll_fwd_peak_679b	GAS2L3	22.79	3.96474	4.12138	exon	B.1
peaks_nodup_uniq_B.1_infectedAll_fwd_peak_681	CHPT1	3.96	4.73505	2.67066	intron	B.1
peaks_nodup_uniq_B.1_infectedAll_fwd_peak_687	LOC103238992	3.47	4.26242	2.67066	intron	B.1
peaks_nodup_uniq_B.1_infectedAll_fwd_peak_688	LOC103239000	15.85	3.83019	2.32146	tts	B.1
peaks_nodup_uniq_B.1_infectedAll_fwd_peak_690	LOC103239015	5.45	5.2864	2.8613	intron	B.1
peaks_nodup_uniq_B.1_infectedAll_fwd_peak_691	LOC103239015	11.39	6.19711	4.65099	intron	B.1
peaks_nodup_uniq_B.1_infectedAll_fwd_peak_692	LOC103239015	3.47	4.06164	1.68584	intergenic	B.1
peaks_nodup_uniq_B.1_infectedAll_fwd_peak_694	LOC103239026	8.92	8.26435	7.04255	tts	B.1
peaks_nodup_uniq_B.1_infectedAll_fwd_peak_695	POLR3B	4.46	5.14963	3.94577	intron	B.1
peaks_nodup_uniq_B.1_infectedAll_fwd_peak_700	LOC103239047	3.47	4.26242	2.67066	intron	B.1
peaks_nodup_uniq_B.1_infectedAll_fwd_peak_703	BTBD11	3.47	4.06164	1.68584	intron	B.1
peaks_nodup_uniq_B.1_infectedAll_fwd_peak_704b	PWP1	10.9	5.94941	3.76479	exon	B.1
peaks_nodup_uniq_B.1_infectedAll_fwd_peak_708	TCHP	7.93	4.46321	1.33247	intron	B.1
peaks_nodup_uniq_B.1_infectedAll_fwd_peak_709	TCHP	7.93	6.37601	3.73502	intron	B.1
peaks_nodup_uniq_B.1_infectedAll_fwd_peak_711	LOC103239117	4.46	5.20768	4.32004	intron	B.1
peaks_nodup_uniq_B.1_infectedAll_fwd_peak_717	SDS	8.92	4.95861	2.09477	intergenic	B.1
peaks_nodup_uniq_B.1_infectedAll_fwd_peak_720	SUDS3	7.43	6.58673	4.69886	intron	B.1
peaks_nodup_uniq_B.1_infectedAll_fwd_peak_721	SUDS3	13.87	4.95708	3.38877	intron	B.1
peaks_nodup_uniq_B.1_infectedAll_fwd_peak_722	LOC103239227	4.46	5.20768	4.32004	intergenic	B.1
peaks_nodup_uniq_B.1_infectedAll_fwd_peak_723	CCDC64	17.34	4.58476	4.14794	exon	B.1
peaks_nodup_uniq_B.1_infectedAll_fwd_peak_726	ACADS	4.95	4.96168	1.86202	exon	B.1
peaks_nodup_uniq_B.1_infectedAll_fwd_peak_727	C11H12orf43	5.45	5.37451	3.02968	tts	B.1
peaks_nodup_uniq_B.1_infectedAll_fwd_peak_728	P2RX4	5.45	5.37451	3.02968	intron	B.1
peaks_nodup_uniq_B.1_infectedAll_fwd_peak_729	RNF34	4.46	4.4021	1.57294	promoter-tss	B.1
peaks_nodup_uniq_B.1_infectedAll_fwd_peak_730	LOC103239475	3.47	4.26242	2.67066	intron	B.1
peaks_nodup_uniq_B.1_infectedAll_fwd_peak_731	LOC103239291	7.43	6.58673	4.69886	promoter-tss	B.1
peaks_nodup_uniq_B.1_infectedAll_fwd_peak_734	SETD1B	10.4	5.70171	3.76479	exon	B.1
peaks_nodup_uniq_B.1_infectedAll_fwd_peak_735b	SETD1B	7.43	4.21551	1.33247	exon	B.1
peaks_nodup_uniq_B.1_infectedAll_fwd_peak_736	SETD1B	15.85	8.42642	8.51948	exon	B.1
peaks_nodup_uniq_B.1_infectedAll_fwd_peak_738	WDR66	7.93	6.37601	3.73502	exon	B.1
peaks_nodup_uniq_B.1_infectedAll_fwd_peak_741	MLXIP	10.4	5.70171	3.76479	intron	B.1
peaks_nodup_uniq_B.1_infectedAll_fwd_peak_743	KNTC1	4.95	5.31608	2.71768	promoter-tss	B.1
peaks_nodup_uniq_B.1_infectedAll_fwd_peak_746	ARL6IP4	20.31	3.04449	2.0272	exon	B.1
peaks_nodup_uniq_B.1_infectedAll_fwd_peak_748	RILPL2	10.4	5.70171	3.76479	intron	B.1
peaks_nodup_uniq_B.1_infectedAll_fwd_peak_749	SNRNP35	17.83	7.24402	7.75835	exon	B.1
peaks_nodup_uniq_B.1_infectedAll_fwd_peak_752	GTF2H3	12.39	3.71806	1.70895	intron	B.1
peaks_nodup_uniq_B.1_infectedAll_fwd_peak_753	ZNF664	4.46	4.7057	2.25057	intron	B.1
peaks_nodup_uniq_B.1_infectedAll_fwd_peak_754	ZNF664	3.47	4.26242	2.67066	intron	B.1
peaks_nodup_uniq_B.1_infectedAll_fwd_peak_755	ZNF664	12.39	3.71806	1.70895	exon	B.1
peaks_nodup_uniq_B.1_infectedAll_fwd_peak_756	LOC103239347	3.96	4.73505	2.67066	exon	B.1
peaks_nodup_uniq_B.1_infectedAll_fwd_peak_765	SFSWAP	24.77	5.15401	6.93405	promoter-tss	B.1
peaks_nodup_uniq_B.1_infectedAll_fwd_peak_766	SFSWAP	21.3	3.71704	3.56463	exon	B.1
peaks_nodup_uniq_B.1_infectedAll_fwd_peak_767	SFSWAP	12.88	4.62681	2.67743	intron	B.1
peaks_nodup_uniq_B.1_infectedAll_fwd_peak_769	PUS1	15.36	5.45248	4.83639	exon	B.1
peaks_nodup_uniq_B.1_infectedAll_fwd_peak_770a	EP400	7.93	4.46321	1.33247	exon	B.1
peaks_nodup_uniq_B.1_infectedAll_fwd_peak_770b	EP400	11.89	6.44481	4.65099	exon	B.1
peaks_nodup_uniq_B.1_infectedAll_fwd_peak_771	LOC103239430	5.45	5.37451	3.02968	intron	B.1
peaks_nodup_uniq_B.1_infectedAll_fwd_peak_776	LOC103239445	23.28	8.09462	11.6928	intergenic	B.1
peaks_nodup_uniq_B.1_infectedAll_fwd_peak_780a	LOC103239448	8.42	5.23434	2.72856	exon	B.1
peaks_nodup_uniq_B.1_infectedAll_fwd_peak_781	PXMP2	7.43	5.26939	2.66879	promoter-tss	B.1
peaks_nodup_uniq_B.1_infectedAll_fwd_peak_786	ZNF891	4.95	4.96168	1.86202	exon	B.1
peaks_nodup_uniq_B.1_infectedAll_fwd_peak_791	LOC103239550	4.95	5.6803	4.32004	intron	B.1
peaks_nodup_uniq_B.1_infectedAll_fwd_peak_792	SSNA1	13.87	4.95708	3.38877	intron	B.1
peaks_nodup_uniq_B.1_infectedAll_fwd_peak_793	LOC103239585	8.92	6.19826	3.60416	exon	B.1
peaks_nodup_uniq_B.1_infectedAll_fwd_peak_795	EGFL7	4.95	4.96168	1.86202	exon	B.1
peaks_nodup_uniq_B.1_infectedAll_fwd_peak_796	NOTCH1	7.93	4.46321	1.33247	promoter-tss	B.1
peaks_nodup_uniq_B.1_infectedAll_fwd_peak_797	SEC16A	18.33	6.44328	7.25248	exon	B.1
peaks_nodup_uniq_B.1_infectedAll_fwd_peak_800	CARD9	12.88	6.30929	4.79696	exon	B.1
peaks_nodup_uniq_B.1_infectedAll_fwd_peak_802	LOC103239923	4.46	5.20768	4.32004	intergenic	B.1
peaks_nodup_uniq_B.1_infectedAll_fwd_peak_805	NACC2	5.45	5.37451	3.02968	exon	B.1
peaks_nodup_uniq_B.1_infectedAll_fwd_peak_807	UBAC1	15.85	4.21321	2.87436	intron	B.1
peaks_nodup_uniq_B.1_infectedAll_fwd_peak_809a	CAMSAP1	22.29	3.88217	4.12138	exon	B.1
peaks_nodup_uniq_B.1_infectedAll_fwd_peak_810	CAMSAP1	14.37	4.04385	2.62003	exon	B.1
peaks_nodup_uniq_B.1_infectedAll_fwd_peak_812	LOC103239661	11.89	12.2971	17.7604	intron	B.1
peaks_nodup_uniq_B.1_infectedAll_fwd_peak_813	LOC103239665	5.45	6.15293	6.06467	intergenic	B.1
peaks_nodup_uniq_B.1_infectedAll_fwd_peak_814	LOC103239673	23.78	3.53989	3.45086	intron	B.1
peaks_nodup_uniq_B.1_infectedAll_fwd_peak_817	REXO4	11.89	4.29654	2.04123	exon	B.1
peaks_nodup_uniq_B.1_infectedAll_fwd_peak_818	LOC103239691	5.94	5.88543	3.26799	tts	B.1
peaks_nodup_uniq_B.1_infectedAll_fwd_peak_819	LOC103239704	8.42	4.71091	2.09477	exon	B.1
peaks_nodup_uniq_B.1_infectedAll_fwd_peak_824	BARHL1	3.96	4.73505	2.67066	intron	B.1
peaks_nodup_uniq_B.1_infectedAll_fwd_peak_831a	SETX	11.89	4.29654	2.04123	exon	B.1
peaks_nodup_uniq_B.1_infectedAll_fwd_peak_831b	SETX	11.89	4.60344	2.43186	exon	B.1
peaks_nodup_uniq_B.1_infectedAll_fwd_peak_833	SETX	13.38	3.59396	1.7246	exon	B.1
peaks_nodup_uniq_B.1_infectedAll_fwd_peak_834	RAPGEF1	4.95	5.6803	4.32004	intergenic	B.1
peaks_nodup_uniq_B.1_infectedAll_fwd_peak_835	UCK1	15.36	4.08936	2.87436	exon	B.1
peaks_nodup_uniq_B.1_infectedAll_fwd_peak_839	ASB6	16.35	4.56533	3.85052	tts	B.1
peaks_nodup_uniq_B.1_infectedAll_fwd_peak_841	IER5L	17.34	3.39612	2.16198	exon	B.1
peaks_nodup_uniq_B.1_infectedAll_fwd_peak_842	C12H9orf114	8.92	4.95861	2.09477	intron	B.1
peaks_nodup_uniq_B.1_infectedAll_fwd_peak_845	ODF2	9.91	10.4066	13.7334	promoter-tss	B.1
peaks_nodup_uniq_B.1_infectedAll_fwd_peak_847	NAIF1	4.46	4.54884	1.86202	promoter-tss	B.1
peaks_nodup_uniq_B.1_infectedAll_fwd_peak_849	FAM102A	14.37	3.34057	1.5382	exon	B.1
peaks_nodup_uniq_B.1_infectedAll_fwd_peak_857	DENND1A	4.46	4.4021	1.57294	intron	B.1
peaks_nodup_uniq_B.1_infectedAll_fwd_peak_862	NDUFA8	4.95	4.96168	1.86202	promoter-tss	B.1
peaks_nodup_uniq_B.1_infectedAll_fwd_peak_863	TTLL11	7.93	4.46321	1.33247	promoter-tss	B.1
peaks_nodup_uniq_B.1_infectedAll_fwd_peak_864	TRAF1	21.8	5.69941	6.93219	exon	B.1
peaks_nodup_uniq_B.1_infectedAll_fwd_peak_865	PSMD5	15.85	6.48186	6.02691	exon	B.1
peaks_nodup_uniq_B.1_infectedAll_fwd_peak_866	LOC103219851	13.38	4.79194	3.38877	exon	B.1
peaks_nodup_uniq_B.1_infectedAll_fwd_peak_867b	CDK5RAP2	5.45	4.60672	1.66867	exon	B.1
peaks_nodup_uniq_B.1_infectedAll_fwd_peak_868	CDK5RAP2	13.87	7.43562	6.5495	intron	B.1
peaks_nodup_uniq_B.1_infectedAll_fwd_peak_869	CDK5RAP2	3.47	3.98911	1.42553	intron	B.1
peaks_nodup_uniq_B.1_infectedAll_fwd_peak_872	BRINP1	3.96	4.73505	2.67066	promoter-tss	B.1
peaks_nodup_uniq_B.1_infectedAll_fwd_peak_876	AKNA	5.94	5.78734	3.02968	exon	B.1
peaks_nodup_uniq_B.1_infectedAll_fwd_peak_878	POLE3	47.06	2.40316	3.57994	intron	B.1
peaks_nodup_uniq_B.1_infectedAll_fwd_peak_880	SLC31A2	10.9	5.94941	3.76479	exon	B.1
peaks_nodup_uniq_B.1_infectedAll_fwd_peak_883	SUSD1	6.44	6.20018	4.32004	tts	B.1
peaks_nodup_uniq_B.1_infectedAll_fwd_peak_884	LOC103219015	6.44	4.65013	1.73039	intergenic	B.1
peaks_nodup_uniq_B.1_infectedAll_fwd_peak_889	KLF4	3.47	4.26242	2.67066	intergenic	B.1
peaks_nodup_uniq_B.1_infectedAll_fwd_peak_890	ZNF462	9.91	6.81751	4.60775	exon	B.1
peaks_nodup_uniq_B.1_infectedAll_fwd_peak_898	TRIM14	3.96	4.59556	1.99324	intron	B.1
peaks_nodup_uniq_B.1_infectedAll_fwd_peak_899	XPA	8.42	4.71091	2.09477	intron	B.1
peaks_nodup_uniq_B.1_infectedAll_fwd_peak_900b	SHB	18.83	3.54022	2.47421	exon	B.1
peaks_nodup_uniq_B.1_infectedAll_fwd_peak_906	CREB3	18.83	3.30421	2.04029	promoter-tss	B.1
peaks_nodup_uniq_B.1_infectedAll_fwd_peak_908	LOC103219257	10.4	3.80114	1.40639	tts	B.1
peaks_nodup_uniq_B.1_infectedAll_fwd_peak_909a	FAM219A	8.42	4.71091	2.09477	intron	B.1
peaks_nodup_uniq_B.1_infectedAll_fwd_peak_911	NOL6	9.91	7.79144	6.02233	exon	B.1
peaks_nodup_uniq_B.1_infectedAll_fwd_peak_912	SPINK4	6.44	5.31444	2.67066	promoter-tss	B.1
peaks_nodup_uniq_B.1_infectedAll_fwd_peak_914	SMU1	4.95	5.04577	2.04217	intron	B.1
peaks_nodup_uniq_B.1_infectedAll_fwd_peak_915	TOPORS	28.73	4.24761	6.16954	exon	B.1
peaks_nodup_uniq_B.1_infectedAll_fwd_peak_918	LOC103219880	8.42	4.71091	2.09477	intron	B.1
peaks_nodup_uniq_B.1_infectedAll_fwd_peak_919	LOC103219880	6.44	4.709	1.8191	intron	B.1
peaks_nodup_uniq_B.1_infectedAll_fwd_peak_924	LOC103219417	7.93	4.46321	1.33247	exon	B.1
peaks_nodup_uniq_B.1_infectedAll_fwd_peak_926	PSIP1	34.18	2.51305	2.56334	intron	B.1
peaks_nodup_uniq_B.1_infectedAll_fwd_peak_927	PSIP1	19.32	5.08016	5.52473	intron	B.1
peaks_nodup_uniq_B.1_infectedAll_fwd_peak_928	NFIB	4.46	4.54884	1.86202	promoter-tss	B.1
peaks_nodup_uniq_B.1_infectedAll_fwd_peak_930	NFIB	6.94	4.95976	1.73039	intron	B.1
peaks_nodup_uniq_B.1_infectedAll_fwd_peak_935	LOC103219466	13.38	7.18791	6.5495	tts	B.1
peaks_nodup_uniq_B.1_infectedAll_fwd_peak_936	RANBP6	12.39	6.69251	5.61698	exon	B.1
peaks_nodup_uniq_B.1_infectedAll_fwd_peak_937	RANBP6	20.31	3.55191	3.02126	exon	B.1
peaks_nodup_uniq_B.1_infectedAll_fwd_peak_938a	KIAA2026	13.38	7.18791	6.5495	exon	B.1
peaks_nodup_uniq_B.1_infectedAll_fwd_peak_938b	KIAA2026	17.83	6.72658	7.05995	exon	B.1
peaks_nodup_uniq_B.1_infectedAll_fwd_peak_941	GLIS3	14.86	5.28734	4.12138	intron	B.1
peaks_nodup_uniq_B.1_infectedAll_fwd_peak_945	LOC103219508	22.79	2.83196	1.73039	exon	B.1
peaks_nodup_uniq_B.1_infectedAll_fwd_peak_949	KIAA0020	10.4	5.70171	3.76479	intron	B.1
peaks_nodup_uniq_B.1_infectedAll_fwd_peak_954	SMC5	10.9	3.96627	1.40639	intron	B.1
peaks_nodup_uniq_B.1_infectedAll_fwd_peak_956	ZFAND5	4.46	4.54884	1.86202	intergenic	B.1
peaks_nodup_uniq_B.1_infectedAll_fwd_peak_957	ZFAND5	4.46	5.20768	4.32004	intergenic	B.1
peaks_nodup_uniq_B.1_infectedAll_fwd_peak_958	RORB	3.47	4.26242	2.67066	intergenic	B.1
peaks_nodup_uniq_B.1_infectedAll_fwd_peak_964	NAA35	6.44	5.90493	3.69931	intron	B.1
peaks_nodup_uniq_B.1_infectedAll_fwd_peak_965	CTSL	3.47	4.21491	2.39042	intron	B.1
peaks_nodup_uniq_B.1_infectedAll_fwd_peak_968	CKS2	5.94	6.62556	6.06467	intergenic	B.1
peaks_nodup_uniq_B.1_infectedAll_fwd_peak_969	LOC103219727	6.94	6.61301	4.32004	intergenic	B.1
peaks_nodup_uniq_B.1_infectedAll_fwd_peak_972	LOC103219741	3.47	4.26242	2.67066	intergenic	B.1
peaks_nodup_uniq_B.1_infectedAll_fwd_peak_974	LOC103219750	10.9	9.91569	9.92214	intergenic	B.1
peaks_nodup_uniq_B.1_infectedAll_fwd_peak_975	LOC103219750	3.96	4.43144	1.42553	intergenic	B.1
peaks_nodup_uniq_B.1_infectedAll_fwd_peak_976	LOC103219908	9.41	5.20631	2.89974	intergenic	B.1
peaks_nodup_uniq_B.1_infectedAll_fwd_peak_981	PHF2	4.46	5.20768	4.32004	intron	B.1
peaks_nodup_uniq_B.1_infectedAll_fwd_peak_982	PHF2	14.86	5.28734	4.12138	exon	B.1
peaks_nodup_uniq_B.1_infectedAll_fwd_peak_989	PTCH1	24.77	4.29501	5.26669	promoter-tss	B.1
peaks_nodup_uniq_B.1_infectedAll_fwd_peak_990	PTCH1	13.87	3.91348	2.00408	promoter-tss	B.1
peaks_nodup_uniq_B.1_infectedAll_fwd_peak_991	PTCH1	10.9	5.94941	3.76479	exon	B.1
peaks_nodup_uniq_B.1_infectedAll_fwd_peak_992	LOC103219829	7.93	4.46321	1.33247	promoter-tss	B.1
peaks_nodup_uniq_B.1_infectedAll_fwd_peak_993	LOC103219829	17.34	6.11301	6.44689	exon	B.1
peaks_nodup_uniq_B.1_infectedAll_fwd_peak_997	LOC103239946	19.82	10.408	12.8958	exon	B.1
peaks_nodup_uniq_B.1_infectedAll_fwd_peak_1001	BCKDHB	5.45	4.60672	1.66867	intron	B.1
peaks_nodup_uniq_B.1_infectedAll_fwd_peak_1005	ZNF292	18.83	4.95631	4.79696	exon	B.1
peaks_nodup_uniq_B.1_infectedAll_fwd_peak_1006	ZNF292	10.4	5.70171	3.76479	exon	B.1
peaks_nodup_uniq_B.1_infectedAll_fwd_peak_1008	LOC103240088	7.93	6.37601	3.73502	intergenic	B.1
peaks_nodup_uniq_B.1_infectedAll_fwd_peak_1010a	LOC103240109	11.39	4.13141	2.04123	exon	B.1
peaks_nodup_uniq_B.1_infectedAll_fwd_peak_1010b	LOC103240109	10.9	4.57647	2.13121	exon	B.1
peaks_nodup_uniq_B.1_infectedAll_fwd_peak_1010c	LOC103240109	12.39	6.0841	4.79696	exon	B.1
peaks_nodup_uniq_B.1_infectedAll_fwd_peak_1012	LOC103240109	9.41	4.33859	1.86202	exon	B.1
peaks_nodup_uniq_B.1_infectedAll_fwd_peak_1013	MANEA	9.41	4.73301	2.35114	exon	B.1
peaks_nodup_uniq_B.1_infectedAll_fwd_peak_1014	FUT9	4.46	4.54884	1.86202	exon	B.1
peaks_nodup_uniq_B.1_infectedAll_fwd_peak_1018	ZC3H12D	32.2	5.53351	10.4812	tts	B.1
peaks_nodup_uniq_B.1_infectedAll_fwd_peak_1020	SHPRH	7.43	4.21551	1.33247	exon	B.1
peaks_nodup_uniq_B.1_infectedAll_fwd_peak_1022	FBXO30	28.24	3.24865	3.85366	exon	B.1
peaks_nodup_uniq_B.1_infectedAll_fwd_peak_1023	PLAGL1	15.36	3.27149	1.6067	exon	B.1
peaks_nodup_uniq_B.1_infectedAll_fwd_peak_1024	HIVEP2	35.67	2.2918	1.76756	exon	B.1
peaks_nodup_uniq_B.1_infectedAll_fwd_peak_1025	HIVEP2	30.71	3.52387	4.81256	exon	B.1
peaks_nodup_uniq_B.1_infectedAll_fwd_peak_1026	CITED2	19.82	3.25251	2.10175	promoter-tss	B.1
peaks_nodup_uniq_B.1_infectedAll_fwd_peak_1030	LOC103241002	5.45	4.60672	1.66867	exon	B.1
peaks_nodup_uniq_B.1_infectedAll_fwd_peak_1032	LOC103240311	12.39	9.56073	9.75911	intron	B.1
peaks_nodup_uniq_B.1_infectedAll_fwd_peak_1034a	BCLAF1	25.76	3.52117	3.8059	exon	B.1
peaks_nodup_uniq_B.1_infectedAll_fwd_peak_1035	MTFR2	35.67	4.58361	8.85921	exon	B.1
peaks_nodup_uniq_B.1_infectedAll_fwd_peak_1037	MTFR2	4.46	4.54884	1.86202	intergenic	B.1
peaks_nodup_uniq_B.1_infectedAll_fwd_peak_1038	AHI1	32.2	2.37151	1.8588	exon	B.1
peaks_nodup_uniq_B.1_infectedAll_fwd_peak_1044	CTGF	7.43	4.95942	2.24991	promoter-tss	B.1
peaks_nodup_uniq_B.1_infectedAll_fwd_peak_1046	EPB41L2	16.84	5.94788	5.64899	intron	B.1
peaks_nodup_uniq_B.1_infectedAll_fwd_peak_1048	SMLR1	7.43	6.02216	3.73502	intron	B.1
peaks_nodup_uniq_B.1_infectedAll_fwd_peak_1049	SMLR1	5.45	5.37451	3.02968	intron	B.1
peaks_nodup_uniq_B.1_infectedAll_fwd_peak_1050	ARHGAP18	3.96	4.68227	2.39042	intron	B.1
peaks_nodup_uniq_B.1_infectedAll_fwd_peak_1058	ECHDC1	9.41	5.20631	2.89974	intron	B.1
peaks_nodup_uniq_B.1_infectedAll_fwd_peak_1062	LOC103240480	27.74	2.61295	1.86202	exon	B.1
peaks_nodup_uniq_B.1_infectedAll_fwd_peak_1063	LOC103240480	9.91	5.45401	2.89974	intron	B.1
peaks_nodup_uniq_B.1_infectedAll_fwd_peak_1066	CEP85L	18.83	3.30421	2.04029	exon	B.1
peaks_nodup_uniq_B.1_infectedAll_fwd_peak_1067	LOC103240485	21.8	3.79961	3.56463	exon	B.1
peaks_nodup_uniq_B.1_infectedAll_fwd_peak_1069	GOPC	9.41	5.20631	2.89974	intron	B.1
peaks_nodup_uniq_B.1_infectedAll_fwd_peak_1070	TSPYL1	35.17	3.61735	6.26253	exon	B.1
peaks_nodup_uniq_B.1_infectedAll_fwd_peak_1071	TSPYL1	8.42	4.66427	2.05294	tts	B.1
peaks_nodup_uniq_B.1_infectedAll_fwd_peak_1076	LAMA4	17.83	4.09444	3.15658	intron	B.1
peaks_nodup_uniq_B.1_infectedAll_fwd_peak_1079b	LOC103240992	14.37	4.5196	3.26229	exon	B.1
peaks_nodup_uniq_B.1_infectedAll_fwd_peak_1080a	LOC103240992	16.35	3.46965	2.09477	exon	B.1
peaks_nodup_uniq_B.1_infectedAll_fwd_peak_1080b	LOC103240992	20.31	3.04449	2.0272	exon	B.1
peaks_nodup_uniq_B.1_infectedAll_fwd_peak_1081	LOC103240992	16.84	3.56873	2.09477	exon	B.1
peaks_nodup_uniq_B.1_infectedAll_fwd_peak_1085	CDK19	34.68	2.97317	3.93593	promoter-tss	B.1
peaks_nodup_uniq_B.1_infectedAll_fwd_peak_1086	CDK19	8.92	7.08373	4.82758	intron	B.1
peaks_nodup_uniq_B.1_infectedAll_fwd_peak_1089	LOC103240993	16.35	5.78275	5.64899	exon	B.1
peaks_nodup_uniq_B.1_infectedAll_fwd_peak_1091	ZBTB24	11.39	6.19711	4.65099	exon	B.1
peaks_nodup_uniq_B.1_infectedAll_fwd_peak_1092	MICAL1	6.94	5.6683	2.67066	promoter-tss	B.1
peaks_nodup_uniq_B.1_infectedAll_fwd_peak_1093	PPIL6	3.47	3.98911	1.42553	promoter-tss	B.1
peaks_nodup_uniq_B.1_infectedAll_fwd_peak_1094b	CD164	15.36	3.4078	1.82682	intron	B.1
peaks_nodup_uniq_B.1_infectedAll_fwd_peak_1097	SCML4	33.19	2.63014	2.79326	exon	B.1
peaks_nodup_uniq_B.1_infectedAll_fwd_peak_1100	PRDM1	17.34	4.36644	3.78865	exon	B.1
peaks_nodup_uniq_B.1_infectedAll_fwd_peak_1106	COQ3	14.86	3.96551	2.30038	exon	B.1
peaks_nodup_uniq_B.1_infectedAll_fwd_peak_1107	COQ3	35.67	4.58361	8.85921	exon	B.1
peaks_nodup_uniq_B.1_infectedAll_fwd_peak_1110a	LOC103240716	3.96	4.68227	2.39042	exon	B.1
peaks_nodup_uniq_B.1_infectedAll_fwd_peak_1110b	LOC103240716	3.47	4.21491	2.39042	exon	B.1
peaks_nodup_uniq_B.1_infectedAll_fwd_peak_1114b	LOC103240757	14.37	3.65872	2.02602	exon	B.1
peaks_nodup_uniq_B.1_infectedAll_fwd_peak_1115	LOC103240757	4.46	4.96237	3.02968	intron	B.1
peaks_nodup_uniq_B.1_infectedAll_fwd_peak_1117	ARID1B	22.29	3.32758	2.93725	exon	B.1
peaks_nodup_uniq_B.1_infectedAll_fwd_peak_1125	SERAC1	15.36	4.08936	2.87436	tts	B.1
peaks_nodup_uniq_B.1_infectedAll_fwd_peak_1127	LOC103240799	8.92	5.38979	2.64042	exon	B.1
peaks_nodup_uniq_B.1_infectedAll_fwd_peak_1131	ACAT2	27.74	4.10607	5.61975	exon	B.1
peaks_nodup_uniq_B.1_infectedAll_fwd_peak_1132a	LOC103240830	10.9	4.24958	1.74956	exon	B.1
peaks_nodup_uniq_B.1_infectedAll_fwd_peak_1132b	LOC103240830	16.35	3.46965	2.09477	exon	B.1
peaks_nodup_uniq_B.1_infectedAll_fwd_peak_1134	MAP3K4	13.38	3.99329	2.30326	exon	B.1
peaks_nodup_uniq_B.1_infectedAll_fwd_peak_1136	LOC103240868	16.84	4.95657	4.24986	intron	B.1
peaks_nodup_uniq_B.1_infectedAll_fwd_peak_1138	LOC103240938	3.96	4.73505	2.67066	intergenic	B.1
peaks_nodup_uniq_B.1_infectedAll_fwd_peak_1140	LOC103240939	3.47	4.26242	2.67066	intergenic	B.1
peaks_nodup_uniq_B.1_infectedAll_fwd_peak_1143b	KIF25	10.4	4.45446	2.23222	exon	B.1
peaks_nodup_uniq_B.1_infectedAll_fwd_peak_1144	KIF25	25.27	3.75221	4.48438	exon	B.1
peaks_nodup_uniq_B.1_infectedAll_fwd_peak_1148	LOC103240986	8.42	4.28264	1.6067	exon	B.1
peaks_nodup_uniq_B.1_infectedAll_fwd_peak_1149	LOC103240988	5.94	4.96058	1.66867	intergenic	B.1
peaks_nodup_uniq_B.1_infectedAll_fwd_peak_1150	LOC103241048	4.95	5.6803	4.32004	intron	B.1
peaks_nodup_uniq_B.1_infectedAll_fwd_peak_1151	ZNF2	3.96	4.68227	2.39042	exon	B.1
peaks_nodup_uniq_B.1_infectedAll_fwd_peak_1153	NCAPH	9.41	6.27266	4.3145	intron	B.1
peaks_nodup_uniq_B.1_infectedAll_fwd_peak_1154a	CNNM3	13.38	7.18791	6.5495	intron	B.1
peaks_nodup_uniq_B.1_infectedAll_fwd_peak_1154b	CNNM3	11.39	6.19711	4.65099	intron	B.1
peaks_nodup_uniq_B.1_infectedAll_fwd_peak_1154c	CNNM3	8.92	5.50957	2.72856	intron	B.1
peaks_nodup_uniq_B.1_infectedAll_fwd_peak_1157	LIPT1	3.96	4.73505	2.67066	intron	B.1
peaks_nodup_uniq_B.1_infectedAll_fwd_peak_1159	EIF5B	32.7	3.36965	4.78387	exon	B.1
peaks_nodup_uniq_B.1_infectedAll_fwd_peak_1160	EIF5B	28.73	2.47777	1.62183	exon	B.1
peaks_nodup_uniq_B.1_infectedAll_fwd_peak_1161	EIF5B	4.46	4.78825	2.49156	intron	B.1
peaks_nodup_uniq_B.1_infectedAll_fwd_peak_1162	EIF5B	10.4	6.7079	5.07481	intron	B.1
peaks_nodup_uniq_B.1_infectedAll_fwd_peak_1163	EIF5B	48.05	3.27026	7.58296	intron	B.1
peaks_nodup_uniq_B.1_infectedAll_fwd_peak_1165	IL1R2	4.46	5.20768	4.32004	intron	B.1
peaks_nodup_uniq_B.1_infectedAll_fwd_peak_1175	GCC2	4.46	4.54884	1.86202	intergenic	B.1
peaks_nodup_uniq_B.1_infectedAll_fwd_peak_1177	GCC2	10.9	4.24958	1.74956	exon	B.1
peaks_nodup_uniq_B.1_infectedAll_fwd_peak_1178a	GCC2	20.81	3.63447	3.02126	exon	B.1
peaks_nodup_uniq_B.1_infectedAll_fwd_peak_1178b	GCC2	18.83	4.7203	4.4198	exon	B.1
peaks_nodup_uniq_B.1_infectedAll_fwd_peak_1179a	LIMS1	3.96	4.73505	2.67066	exon	B.1
peaks_nodup_uniq_B.1_infectedAll_fwd_peak_1179b	LIMS1	4.46	5.20768	4.32004	exon	B.1
peaks_nodup_uniq_B.1_infectedAll_fwd_peak_1181	LOC103241219	28.73	2.70302	2.25057	exon	B.1
peaks_nodup_uniq_B.1_infectedAll_fwd_peak_1182	LOC103241219	36.16	3.37857	5.71408	exon	B.1
peaks_nodup_uniq_B.1_infectedAll_fwd_peak_1185	SOWAHC	17.83	3.03781	1.38307	exon	B.1
peaks_nodup_uniq_B.1_infectedAll_fwd_peak_1187	ZC3H6	4.95	4.96168	1.86202	intron	B.1
peaks_nodup_uniq_B.1_infectedAll_fwd_peak_1188	ZC3H6	23.78	8.25975	11.6928	intron	B.1
peaks_nodup_uniq_B.1_infectedAll_fwd_peak_1189a	ZC3H6	6.94	5.6683	2.67066	exon	B.1
peaks_nodup_uniq_B.1_infectedAll_fwd_peak_1191	CHCHD5	19.32	3.38677	2.54555	exon	B.1
peaks_nodup_uniq_B.1_infectedAll_fwd_peak_1192	EIF2AK3	8.42	4.28264	1.6067	promoter-tss	B.1
peaks_nodup_uniq_B.1_infectedAll_fwd_peak_1194a	TEX37	19.82	2.97372	1.58946	exon	B.1
peaks_nodup_uniq_B.1_infectedAll_fwd_peak_1195	TEX37	18.83	6.60841	7.25248	exon	B.1
peaks_nodup_uniq_B.1_infectedAll_fwd_peak_1196	LOC103241356	15.36	5.84194	5.42411	exon	B.1
peaks_nodup_uniq_B.1_infectedAll_fwd_peak_1197	LOC103241356	29.72	2.56034	1.9766	exon	B.1
peaks_nodup_uniq_B.1_infectedAll_fwd_peak_1201	LOC103219929	17.83	3.76689	2.66879	intron	B.1
peaks_nodup_uniq_B.1_infectedAll_fwd_peak_1202	LOC103219929	23.28	8.09462	11.6928	intron	B.1
peaks_nodup_uniq_B.1_infectedAll_fwd_peak_1205	LOC103219960	4.46	4.7057	2.25057	intergenic	B.1
peaks_nodup_uniq_B.1_infectedAll_fwd_peak_1206	LOC103220009	19.32	4.06413	3.76479	exon	B.1
peaks_nodup_uniq_B.1_infectedAll_fwd_peak_1207	DOK1	12.39	6.0841	4.79696	promoter-tss	B.1
peaks_nodup_uniq_B.1_infectedAll_fwd_peak_1209	BOLA3	7.43	7.02585	5.65582	intron	B.1
peaks_nodup_uniq_B.1_infectedAll_fwd_peak_1210	TPRKB	3.47	4.21491	2.39042	intergenic	B.1
peaks_nodup_uniq_B.1_infectedAll_fwd_peak_1212	FBXO41	3.47	4.26242	2.67066	exon	B.1
peaks_nodup_uniq_B.1_infectedAll_fwd_peak_1214	EXOC6B	11.39	6.19711	4.65099	promoter-tss	B.1
peaks_nodup_uniq_B.1_infectedAll_fwd_peak_1215	LOC103220065	10.9	3.96627	1.40639	intron	B.1
peaks_nodup_uniq_B.1_infectedAll_fwd_peak_1219	C14H2orf42	5.94	5.1827	1.99324	promoter-tss	B.1
peaks_nodup_uniq_B.1_infectedAll_fwd_peak_1220	PCBP1	8.42	4.71091	2.09477	intergenic	B.1
peaks_nodup_uniq_B.1_infectedAll_fwd_peak_1221	PCBP1	5.45	5.65738	3.79536	exon	B.1
peaks_nodup_uniq_B.1_infectedAll_fwd_peak_1222	AAK1	9.41	5.20631	2.89974	intron	B.1
peaks_nodup_uniq_B.1_infectedAll_fwd_peak_1227	LOC103220110	9.41	5.20631	2.89974	intergenic	B.1
peaks_nodup_uniq_B.1_infectedAll_fwd_peak_1229	PPP3R1	12.39	4.46168	2.67743	intron	B.1
peaks_nodup_uniq_B.1_infectedAll_fwd_peak_1237	SPRED2	25.76	2.57316	1.51806	exon	B.1
peaks_nodup_uniq_B.1_infectedAll_fwd_peak_1239a	SERTAD2	21.3	2.78778	1.63486	exon	B.1
peaks_nodup_uniq_B.1_infectedAll_fwd_peak_1239d	SERTAD2	23.78	2.75325	1.69868	exon	B.1
peaks_nodup_uniq_B.1_infectedAll_fwd_peak_1241	VPS54	16.35	5.78275	5.64899	intergenic	B.1
peaks_nodup_uniq_B.1_infectedAll_fwd_peak_1242	UGP2	12.88	4.62681	2.67743	exon	B.1
peaks_nodup_uniq_B.1_infectedAll_fwd_peak_1244	USP34	6.44	6.20018	4.32004	intron	B.1
peaks_nodup_uniq_B.1_infectedAll_fwd_peak_1249	LOC103220238	24.77	4.29501	5.26669	exon	B.1
peaks_nodup_uniq_B.1_infectedAll_fwd_peak_1253	LOC103220243	3.47	4.26242	2.67066	intergenic	B.1
peaks_nodup_uniq_B.1_infectedAll_fwd_peak_1254	RTN4	43.1	3.3923	7.11756	promoter-tss	B.1
peaks_nodup_uniq_B.1_infectedAll_fwd_peak_1255	LOC103220252	12.88	3.85567	1.70895	exon	B.1
peaks_nodup_uniq_B.1_infectedAll_fwd_peak_1258	LOC103220256	6.44	5.31444	2.67066	exon	B.1
peaks_nodup_uniq_B.1_infectedAll_fwd_peak_1261	GPR75	5.94	5.1827	1.99324	intron	B.1
peaks_nodup_uniq_B.1_infectedAll_fwd_peak_1264	LOC103220331	15.85	5.61761	4.83639	intron	B.1
peaks_nodup_uniq_B.1_infectedAll_fwd_peak_1265	LOC103220329	9.41	5.20631	2.89974	intron	B.1
peaks_nodup_uniq_B.1_infectedAll_fwd_peak_1266a	LOC103220335	4.95	5.6803	4.32004	intergenic	B.1
peaks_nodup_uniq_B.1_infectedAll_fwd_peak_1266b	LOC103220335	7.93	8.51607	9.75911	intergenic	B.1
peaks_nodup_uniq_B.1_infectedAll_fwd_peak_1269	SRBD1	12.39	4.46168	2.67743	exon	B.1
peaks_nodup_uniq_B.1_infectedAll_fwd_peak_1270	LOC103220355	6.44	5.31444	2.67066	exon	B.1
peaks_nodup_uniq_B.1_infectedAll_fwd_peak_1273	ZFP36L2	23.28	4.04731	4.65919	exon	B.1
peaks_nodup_uniq_B.1_infectedAll_fwd_peak_1275	PKDCC	4.95	5.41274	3.02968	promoter-tss	B.1
peaks_nodup_uniq_B.1_infectedAll_fwd_peak_1276	LOC103220416	6.44	5.63653	3.17047	intergenic	B.1
peaks_nodup_uniq_B.1_infectedAll_fwd_peak_1277	SLC8A1	3.47	4.26242	2.67066	intergenic	B.1
peaks_nodup_uniq_B.1_infectedAll_fwd_peak_1279	THUMPD2	18.33	3.22164	2.04029	exon	B.1
peaks_nodup_uniq_B.1_infectedAll_fwd_peak_1282	CDKL4	6.44	5.31444	2.67066	tts	B.1
peaks_nodup_uniq_B.1_infectedAll_fwd_peak_1284	DHX57	10.4	3.80114	1.40639	exon	B.1
peaks_nodup_uniq_B.1_infectedAll_fwd_peak_1285	LOC103220451	9.41	4.73301	2.35114	intron	B.1
peaks_nodup_uniq_B.1_infectedAll_fwd_peak_1286	LOC103220451	17.83	7.24402	7.75835	intron	B.1
peaks_nodup_uniq_B.1_infectedAll_fwd_peak_1290	LOC103220473	9.41	4.73301	2.35114	intergenic	B.1
peaks_nodup_uniq_B.1_infectedAll_fwd_peak_1294	PRKD3	10.9	3.96627	1.40639	promoter-tss	B.1
peaks_nodup_uniq_B.1_infectedAll_fwd_peak_1295	NDUFAF7	10.9	9.59583	9.20875	exon	B.1
peaks_nodup_uniq_B.1_infectedAll_fwd_peak_1296	CEBPZ	24.27	3.15933	2.91293	exon	B.1
peaks_nodup_uniq_B.1_infectedAll_fwd_peak_1301a	FAM98A	17.34	6.11301	6.44689	exon	B.1
peaks_nodup_uniq_B.1_infectedAll_fwd_peak_1301b	FAM98A	10.4	3.80114	1.40639	exon	B.1
peaks_nodup_uniq_B.1_infectedAll_fwd_peak_1304	TRMT61B	9.41	4.00485	1.46301	exon	B.1
peaks_nodup_uniq_B.1_infectedAll_fwd_peak_1308	ZNF513	12.39	3.93677	2.0074	exon	B.1
peaks_nodup_uniq_B.1_infectedAll_fwd_peak_1317	KIF3C	21.8	2.84971	1.63486	exon	B.1
peaks_nodup_uniq_B.1_infectedAll_fwd_peak_1319a	DTNB	14.86	6.10078	5.18415	exon	B.1
peaks_nodup_uniq_B.1_infectedAll_fwd_peak_1320	DTNB	4.95	5.51297	3.44109	intron	B.1
peaks_nodup_uniq_B.1_infectedAll_fwd_peak_1321	DNMT3A	5.45	6.15293	6.06467	intron	B.1
peaks_nodup_uniq_B.1_infectedAll_fwd_peak_1324	DNMT3A	15.36	5.45248	4.83639	exon	B.1
peaks_nodup_uniq_B.1_infectedAll_fwd_peak_1328	LOC103220672	21.8	5.69941	6.93219	exon	B.1
peaks_nodup_uniq_B.1_infectedAll_fwd_peak_1329	LOC103220685	16.35	3.46965	2.09477	exon	B.1
peaks_nodup_uniq_B.1_infectedAll_fwd_peak_1332	LOC103220718	17.34	3.66781	2.66879	intron	B.1
peaks_nodup_uniq_B.1_infectedAll_fwd_peak_1335a	LOC103220725	11.39	5.63374	3.94577	intergenic	B.1
peaks_nodup_uniq_B.1_infectedAll_fwd_peak_1339	NBAS	3.96	4.73505	2.67066	intron	B.1
peaks_nodup_uniq_B.1_infectedAll_fwd_peak_1340	GREB1	5.94	5.69247	2.8613	intergenic	B.1
peaks_nodup_uniq_B.1_infectedAll_fwd_peak_1343	PQLC3	11.89	4.29654	2.04123	exon	B.1
peaks_nodup_uniq_B.1_infectedAll_fwd_peak_1344	LOC103220820	4.46	4.54884	1.86202	intergenic	B.1
peaks_nodup_uniq_B.1_infectedAll_fwd_peak_1345	IAH1	15.85	5.61761	4.83639	exon	B.1
peaks_nodup_uniq_B.1_infectedAll_fwd_peak_1346	ASAP2	3.96	4.73505	2.67066	intergenic	B.1
peaks_nodup_uniq_B.1_infectedAll_fwd_peak_1347	ASAP2	4.95	5.6803	4.32004	intergenic	B.1
peaks_nodup_uniq_B.1_infectedAll_fwd_peak_1350	LOC103220899	4.95	4.96168	1.86202	intergenic	B.1
peaks_nodup_uniq_B.1_infectedAll_fwd_peak_1351	LOC103220899	5.94	5.78734	3.02968	intergenic	B.1
peaks_nodup_uniq_B.1_infectedAll_fwd_peak_1354	LOC103220933	5.94	5.78734	3.02968	intergenic	B.1
peaks_nodup_uniq_B.1_infectedAll_fwd_peak_1355	LOC103220933	4.46	4.54884	1.86202	intergenic	B.1
peaks_nodup_uniq_B.1_infectedAll_fwd_peak_1358	CRYGS	10.4	3.80114	1.40639	exon	B.1
peaks_nodup_uniq_B.1_infectedAll_fwd_peak_1360	SENP2	22.29	5.82326	7.67081	exon	B.1
peaks_nodup_uniq_B.1_infectedAll_fwd_peak_1362	LOC103221109	14.86	5.28734	4.12138	exon	B.1
peaks_nodup_uniq_B.1_infectedAll_fwd_peak_1364	MAP3K13	3.47	4.21491	2.39042	intron	B.1
peaks_nodup_uniq_B.1_infectedAll_fwd_peak_1366	LOC103221117	12.88	4.62681	2.67743	exon	B.1
peaks_nodup_uniq_B.1_infectedAll_fwd_peak_1367	LOC103221117	15.85	4.95672	3.94795	exon	B.1
peaks_nodup_uniq_B.1_infectedAll_fwd_peak_1368	CAMK2N2	21.3	3.71704	3.56463	intron	B.1
peaks_nodup_uniq_B.1_infectedAll_fwd_peak_1369	PARL	4.95	5.51297	3.44109	intron	B.1
peaks_nodup_uniq_B.1_infectedAll_fwd_peak_1370	LOC103221174	7.43	4.21551	1.33247	exon	B.1
peaks_nodup_uniq_B.1_infectedAll_fwd_peak_1371	TBL1XR1	7.43	6.19928	4.02384	intron	B.1
peaks_nodup_uniq_B.1_infectedAll_fwd_peak_1378	LOC103221253	19.32	6.77355	8.0838	intron	B.1
peaks_nodup_uniq_B.1_infectedAll_fwd_peak_1379	LOC103221253	5.94	4.96058	1.66867	intron	B.1
peaks_nodup_uniq_B.1_infectedAll_fwd_peak_1384	PHC3	4.46	4.54884	1.86202	intron	B.1
peaks_nodup_uniq_B.1_infectedAll_fwd_peak_1386	GPR160	8.92	4.95861	2.09477	tts	B.1
peaks_nodup_uniq_B.1_infectedAll_fwd_peak_1388	MECOM	17.83	4.70861	4.14794	exon	B.1
peaks_nodup_uniq_B.1_infectedAll_fwd_peak_1390	LOC103221286	7.43	8.04344	9.75911	exon	B.1
peaks_nodup_uniq_B.1_infectedAll_fwd_peak_1391	LOC103221286	4.46	5.05427	3.44109	intron	B.1
peaks_nodup_uniq_B.1_infectedAll_fwd_peak_1392	LOC103221286	6.94	5.6683	2.67066	exon	B.1
peaks_nodup_uniq_B.1_infectedAll_fwd_peak_1393	GOLIM4	44.09	2.25453	2.63141	exon	B.1
peaks_nodup_uniq_B.1_infectedAll_fwd_peak_1398	TRIM59	7.43	4.21551	1.33247	exon	B.1
peaks_nodup_uniq_B.1_infectedAll_fwd_peak_1399	RSRC1	14.86	5.28734	4.12138	exon	B.1
peaks_nodup_uniq_B.1_infectedAll_fwd_peak_1400	RSRC1	8.42	5.23434	2.72856	exon	B.1
peaks_nodup_uniq_B.1_infectedAll_fwd_peak_1402	SIAH2	9.91	4.19539	1.46301	exon	B.1
peaks_nodup_uniq_B.1_infectedAll_fwd_peak_1403	TSC22D2	11.39	6.19711	4.65099	promoter-tss	B.1
peaks_nodup_uniq_B.1_infectedAll_fwd_peak_1404	LOC103241485	3.47	4.26242	2.67066	intergenic	B.1
peaks_nodup_uniq_B.1_infectedAll_fwd_peak_1405	HLTF	7.93	6.37601	3.73502	intron	B.1
peaks_nodup_uniq_B.1_infectedAll_fwd_peak_1406	PLOD2	4.95	4.96168	1.86202	exon	B.1
peaks_nodup_uniq_B.1_infectedAll_fwd_peak_1413	CEP70	4.46	5.20768	4.32004	intron	B.1
peaks_nodup_uniq_B.1_infectedAll_fwd_peak_1414	CEP70	3.96	4.73505	2.67066	intron	B.1
peaks_nodup_uniq_B.1_infectedAll_fwd_peak_1416	DBR1	16.35	6.6724	6.88211	exon	B.1
peaks_nodup_uniq_B.1_infectedAll_fwd_peak_1418	LOC103241624	10.9	4.57647	2.13121	exon	B.1
peaks_nodup_uniq_B.1_infectedAll_fwd_peak_1419	MSL2	13.38	3.59396	1.7246	promoter-tss	B.1
peaks_nodup_uniq_B.1_infectedAll_fwd_peak_1422	LOC103241627	26.75	3.08352	2.92636	exon	B.1
peaks_nodup_uniq_B.1_infectedAll_fwd_peak_1423	ANAPC13	3.96	4.59556	1.99324	promoter-tss	B.1
peaks_nodup_uniq_B.1_infectedAll_fwd_peak_1430	CAPN7	5.45	5.37451	3.02968	exon	B.1
peaks_nodup_uniq_B.1_infectedAll_fwd_peak_1432	METTL6	12.39	6.69251	5.61698	exon	B.1
peaks_nodup_uniq_B.1_infectedAll_fwd_peak_1437	RAB5A	20.81	5.45171	6.19675	exon	B.1
peaks_nodup_uniq_B.1_infectedAll_fwd_peak_1441	SGOL1	3.47	4.21491	2.39042	intergenic	B.1
peaks_nodup_uniq_B.1_infectedAll_fwd_peak_1442	UBE2E2	18.83	4.95631	4.79696	intron	B.1
peaks_nodup_uniq_B.1_infectedAll_fwd_peak_1443	UBE2E2	10.9	3.96627	1.40639	intron	B.1
peaks_nodup_uniq_B.1_infectedAll_fwd_peak_1444	UBE2E2	19.32	4.06413	3.76479	intron	B.1
peaks_nodup_uniq_B.1_infectedAll_fwd_peak_1448	NR1D2	25.27	3.2031	3.19062	exon	B.1
peaks_nodup_uniq_B.1_infectedAll_fwd_peak_1449	NR1D2	10.9	5.5602	3.3023	exon	B.1
peaks_nodup_uniq_B.1_infectedAll_fwd_peak_1451	NR1D2	7.93	4.46321	1.33247	intergenic	B.1
peaks_nodup_uniq_B.1_infectedAll_fwd_peak_1455	TOP2B	6.44	5.31444	2.67066	exon	B.1
peaks_nodup_uniq_B.1_infectedAll_fwd_peak_1458	LOC103241779	5.94	6.62556	6.06467	intergenic	B.1
peaks_nodup_uniq_B.1_infectedAll_fwd_peak_1460	TGFBR2	20.81	4.0383	3.77718	exon	B.1
peaks_nodup_uniq_B.1_infectedAll_fwd_peak_1464	PDCD6IP	12.88	6.94021	5.61698	intron	B.1
peaks_nodup_uniq_B.1_infectedAll_fwd_peak_1466	LPP	14.37	6.40276	5.84762	intron	B.1
peaks_nodup_uniq_B.1_infectedAll_fwd_peak_1472	LOC103241957	3.47	4.26242	2.67066	exon	B.1
peaks_nodup_uniq_B.1_infectedAll_fwd_peak_1477	RNF168	20.81	3.11526	2.0272	intron	B.1
peaks_nodup_uniq_B.1_infectedAll_fwd_peak_1478	LOC103242001	14.37	4.04385	2.62003	exon	B.1
peaks_nodup_uniq_B.1_infectedAll_fwd_peak_1482	LOC103242006	6.94	5.9221	3.02968	intron	B.1
peaks_nodup_uniq_B.1_infectedAll_fwd_peak_1483	TFRC	14.37	5.48808	4.60825	promoter-tss	B.1
peaks_nodup_uniq_B.1_infectedAll_fwd_peak_1485	LOC103242012	9.41	5.20631	2.89974	intergenic	B.1
peaks_nodup_uniq_B.1_infectedAll_fwd_peak_1486	TNK2	7.43	7.02585	5.65582	promoter-tss	B.1
peaks_nodup_uniq_B.1_infectedAll_fwd_peak_1487	GEMIN4	3.96	4.73505	2.67066	intron	B.1
peaks_nodup_uniq_B.1_infectedAll_fwd_peak_1489	GLOD4	19.32	4.06413	3.76479	intergenic	B.1
peaks_nodup_uniq_B.1_infectedAll_fwd_peak_1492	WDR81	12.88	6.94021	5.61698	exon	B.1
peaks_nodup_uniq_B.1_infectedAll_fwd_peak_1494	SERPINF2	5.45	5.0386	2.38787	exon	B.1
peaks_nodup_uniq_B.1_infectedAll_fwd_peak_1497	SHPK	3.96	4.73505	2.67066	intron	B.1
peaks_nodup_uniq_B.1_infectedAll_fwd_peak_1502	ENO3	21.8	5.42801	6.49043	intron	B.1
peaks_nodup_uniq_B.1_infectedAll_fwd_peak_1504	KIF1C	24.27	4.21244	5.26669	exon	B.1
peaks_nodup_uniq_B.1_infectedAll_fwd_peak_1506a	LOC103242222	4.46	4.54884	1.86202	exon	B.1
peaks_nodup_uniq_B.1_infectedAll_fwd_peak_1506b	LOC103242222	8.42	4.71091	2.09477	exon	B.1
peaks_nodup_uniq_B.1_infectedAll_fwd_peak_1508	RABEP1	9.41	7.43759	6.02233	intron	B.1
peaks_nodup_uniq_B.1_infectedAll_fwd_peak_1510	NUP88	24.77	3.68144	3.9611	exon	B.1
peaks_nodup_uniq_B.1_infectedAll_fwd_peak_1511	NUP88	16.84	3.56873	2.09477	exon	B.1
peaks_nodup_uniq_B.1_infectedAll_fwd_peak_1512	C1QBP	11.89	4.95755	2.8478	tts	B.1
peaks_nodup_uniq_B.1_infectedAll_fwd_peak_1513	MIS12	11.89	6.44481	4.65099	exon	B.1
peaks_nodup_uniq_B.1_infectedAll_fwd_peak_1514b	LOC103242244	22.79	2.97356	2.04217	exon	B.1
peaks_nodup_uniq_B.1_infectedAll_fwd_peak_1515	DVL2	5.45	5.37451	3.02968	exon	B.1
peaks_nodup_uniq_B.1_infectedAll_fwd_peak_1516	NLGN2	21.8	3.25681	2.49777	intron	B.1
peaks_nodup_uniq_B.1_infectedAll_fwd_peak_1519	CD68	47.06	2.82724	5.52473	tts	B.1
peaks_nodup_uniq_B.1_infectedAll_fwd_peak_1520	TP53	6.94	5.43535	2.35114	promoter-tss	B.1
peaks_nodup_uniq_B.1_infectedAll_fwd_peak_1521	KDM6B	28.24	3.32248	4.06278	exon	B.1
peaks_nodup_uniq_B.1_infectedAll_fwd_peak_1522	CHD3	6.94	4.95976	1.73039	intergenic	B.1
peaks_nodup_uniq_B.1_infectedAll_fwd_peak_1526	CHD3	43.6	3.71627	8.14959	intron	B.1
peaks_nodup_uniq_B.1_infectedAll_fwd_peak_1527a	CNTROB	34.18	3.51827	5.76189	promoter-tss	B.1
peaks_nodup_uniq_B.1_infectedAll_fwd_peak_1530a	LOC103242402	9.41	5.20631	2.89974	exon	B.1
peaks_nodup_uniq_B.1_infectedAll_fwd_peak_1530b	LOC103242402	19.32	6.77355	8.0838	exon	B.1
peaks_nodup_uniq_B.1_infectedAll_fwd_peak_1532	LOC103242416	10.4	5.70171	3.76479	exon	B.1
peaks_nodup_uniq_B.1_infectedAll_fwd_peak_1533	HS3ST3B1	11.39	11.8245	17.7604	intron	B.1
peaks_nodup_uniq_B.1_infectedAll_fwd_peak_1535	ZSWIM7	3.47	4.26242	2.67066	promoter-tss	B.1
peaks_nodup_uniq_B.1_infectedAll_fwd_peak_1537	RAI1	12.88	4.08248	2.0074	exon	B.1
peaks_nodup_uniq_B.1_infectedAll_fwd_peak_1539	SREBF1	6.44	4.65013	1.73039	intron	B.1
peaks_nodup_uniq_B.1_infectedAll_fwd_peak_1541	ALKBH5	31.21	2.92821	3.45342	exon	B.1
peaks_nodup_uniq_B.1_infectedAll_fwd_peak_1542	LOC103242496	7.43	6.02216	3.73502	intergenic	B.1
peaks_nodup_uniq_B.1_infectedAll_fwd_peak_1544a	LOC103242496	5.94	4.96058	1.66867	intergenic	B.1
peaks_nodup_uniq_B.1_infectedAll_fwd_peak_1544b	LOC103242496	7.93	7.43868	5.65582	intergenic	B.1
peaks_nodup_uniq_B.1_infectedAll_fwd_peak_1547	RNF112	4.95	5.6803	4.32004	exon	B.1
peaks_nodup_uniq_B.1_infectedAll_fwd_peak_1549a	SPECC1	18.83	3.30421	2.04029	exon	B.1
peaks_nodup_uniq_B.1_infectedAll_fwd_peak_1549b	SPECC1	31.21	3.57892	5.33946	exon	B.1
peaks_nodup_uniq_B.1_infectedAll_fwd_peak_1550b	SPECC1	33.19	4.62052	8.53991	exon	B.1
peaks_nodup_uniq_B.1_infectedAll_fwd_peak_1552	DHRS7B	6.94	4.95976	1.73039	tts	B.1
peaks_nodup_uniq_B.1_infectedAll_fwd_peak_1559b	PROCA1	14.37	3.20138	1.31932	exon	B.1
peaks_nodup_uniq_B.1_infectedAll_fwd_peak_1562	ABHD15	24.27	3.15933	2.91293	exon	B.1
peaks_nodup_uniq_B.1_infectedAll_fwd_peak_1563	ABHD15	8.92	4.50783	1.6067	exon	B.1
peaks_nodup_uniq_B.1_infectedAll_fwd_peak_1564	NSRP1	24.27	2.52747	1.40249	promoter-tss	B.1
peaks_nodup_uniq_B.1_infectedAll_fwd_peak_1565a	NSRP1	37.65	3.57875	6.4336	exon	B.1
peaks_nodup_uniq_B.1_infectedAll_fwd_peak_1565b	NSRP1	47.06	2.52964	4.15725	exon	B.1
peaks_nodup_uniq_B.1_infectedAll_fwd_peak_1565c	NSRP1	28.73	2.65476	2.09583	exon	B.1
peaks_nodup_uniq_B.1_infectedAll_fwd_peak_1567	GOSR1	12.88	3.85567	1.70895	intron	B.1
peaks_nodup_uniq_B.1_infectedAll_fwd_peak_1570	RAB11FIP4	15.85	4.21321	2.87436	intron	B.1
peaks_nodup_uniq_B.1_infectedAll_fwd_peak_1573	SUZ12	26.26	5.45125	8.31697	exon	B.1
peaks_nodup_uniq_B.1_infectedAll_fwd_peak_1574	ATAD5	11.39	3.64536	1.40639	exon	B.1
peaks_nodup_uniq_B.1_infectedAll_fwd_peak_1575	LOC103242687	8.42	4.71091	2.09477	exon	B.1
peaks_nodup_uniq_B.1_infectedAll_fwd_peak_1576	LOC103242695	19.82	13.01	16.643	intergenic	B.1
peaks_nodup_uniq_B.1_infectedAll_fwd_peak_1577	CCT6B	25.27	5.25309	7.62943	promoter-tss	B.1
peaks_nodup_uniq_B.1_infectedAll_fwd_peak_1578	AP2B1	14.86	5.28734	4.12138	intron	B.1
peaks_nodup_uniq_B.1_infectedAll_fwd_peak_1580	HEATR9	60.93	2.22785	3.76479	exon	B.1
peaks_nodup_uniq_B.1_infectedAll_fwd_peak_1581	HNF1B	23.28	3.46912	3.45086	exon	B.1
peaks_nodup_uniq_B.1_infectedAll_fwd_peak_1582	HNF1B	26.26	4.54271	6.48169	intron	B.1
peaks_nodup_uniq_B.1_infectedAll_fwd_peak_1583	LOC103242780	35.17	2.58382	2.89608	exon	B.1
peaks_nodup_uniq_B.1_infectedAll_fwd_peak_1585	DUSP14	18.83	3.96505	3.17047	exon	B.1
peaks_nodup_uniq_B.1_infectedAll_fwd_peak_1586a	DUSP14	9.91	4.54501	1.86202	exon	B.1
peaks_nodup_uniq_B.1_infectedAll_fwd_peak_1586b	DUSP14	10.4	3.80114	1.40639	exon	B.1
peaks_nodup_uniq_B.1_infectedAll_fwd_peak_1587	ACACA	5.45	5.2864	2.8613	intron	B.1
peaks_nodup_uniq_B.1_infectedAll_fwd_peak_1588	LHX1	8.92	4.95861	2.09477	promoter-tss	B.1
peaks_nodup_uniq_B.1_infectedAll_fwd_peak_1590	LHX1	7.43	4.48458	1.66867	intergenic	B.1
peaks_nodup_uniq_B.1_infectedAll_fwd_peak_1591	LHX1	9.91	5.45401	2.89974	intergenic	B.1
peaks_nodup_uniq_B.1_infectedAll_fwd_peak_1592	LHX1	10.9	5.94941	3.76479	intergenic	B.1
peaks_nodup_uniq_B.1_infectedAll_fwd_peak_1593	PPM1D	13.38	3.59396	1.7246	intergenic	B.1
peaks_nodup_uniq_B.1_infectedAll_fwd_peak_1594	LOC103242807	45.58	2.58761	4.05946	exon	B.1
peaks_nodup_uniq_B.1_infectedAll_fwd_peak_1596	RNFT1	4.95	5.31608	2.71768	intron	B.1
peaks_nodup_uniq_B.1_infectedAll_fwd_peak_1597b	PTRH2	8.92	4.95861	2.09477	exon	B.1
peaks_nodup_uniq_B.1_infectedAll_fwd_peak_1604	COIL	3.47	4.26242	2.67066	exon	B.1
peaks_nodup_uniq_B.1_infectedAll_fwd_peak_1606	LOC103242878	9.41	5.20631	2.89974	intron	B.1
peaks_nodup_uniq_B.1_infectedAll_fwd_peak_1607	LOC103242878	7.93	4.46321	1.33247	exon	B.1
peaks_nodup_uniq_B.1_infectedAll_fwd_peak_1608	C16H17orf67	17.83	5.88576	5.88926	promoter-tss	B.1
peaks_nodup_uniq_B.1_infectedAll_fwd_peak_1609	C16H17orf67	9.41	4.00485	1.46301	intron	B.1
peaks_nodup_uniq_B.1_infectedAll_fwd_peak_1610	C16H17orf67	8.92	7.08373	4.82758	intergenic	B.1
peaks_nodup_uniq_B.1_infectedAll_fwd_peak_1612	LOC103242898	5.94	5.78734	3.02968	promoter-tss	B.1
peaks_nodup_uniq_B.1_infectedAll_fwd_peak_1613	NME2	10.4	8.63896	8.0791	intron	B.1
peaks_nodup_uniq_B.1_infectedAll_fwd_peak_1614	SPAG9	5.94	5.26122	2.09477	intron	B.1
peaks_nodup_uniq_B.1_infectedAll_fwd_peak_1615	LOC103242915	20.31	10.6557	14.0617	intergenic	B.1
peaks_nodup_uniq_B.1_infectedAll_fwd_peak_1616	LOC103242915	10.4	3.80114	1.40639	intergenic	B.1
peaks_nodup_uniq_B.1_infectedAll_fwd_peak_1617	TOB1	17.83	3.76689	2.66879	promoter-tss	B.1
peaks_nodup_uniq_B.1_infectedAll_fwd_peak_1618a	LOC103243832	26.26	3.40703	3.8865	exon	B.1
peaks_nodup_uniq_B.1_infectedAll_fwd_peak_1619	LOC103242925	12.39	3.93677	2.0074	exon	B.1
peaks_nodup_uniq_B.1_infectedAll_fwd_peak_1621b	PPP1R9B	24.77	4.29501	5.26669	exon	B.1
peaks_nodup_uniq_B.1_infectedAll_fwd_peak_1626	MXRA7	21.3	5.06869	6.06467	exon	B.1
peaks_nodup_uniq_B.1_infectedAll_fwd_peak_1627	ST6GALNAC1	15.36	4.08936	2.87436	intron	B.1
peaks_nodup_uniq_B.1_infectedAll_fwd_peak_1630	RHBDF2	12.39	11.1542	13.0447	intron	B.1
peaks_nodup_uniq_B.1_infectedAll_fwd_peak_1635	CDK3	15.36	3.27149	1.6067	exon	B.1
peaks_nodup_uniq_B.1_infectedAll_fwd_peak_1637	CDK3	19.32	3.62869	2.96184	exon	B.1
peaks_nodup_uniq_B.1_infectedAll_fwd_peak_1645	LOC103243036	4.46	5.20768	4.32004	intron	B.1
peaks_nodup_uniq_B.1_infectedAll_fwd_peak_1648	NAT9	6.44	5.31444	2.67066	exon	B.1
peaks_nodup_uniq_B.1_infectedAll_fwd_peak_1651	CPSF4L	13.38	3.59396	1.7246	exon	B.1
peaks_nodup_uniq_B.1_infectedAll_fwd_peak_1652a	CPSF4L	7.93	7.43868	5.65582	intron	B.1
peaks_nodup_uniq_B.1_infectedAll_fwd_peak_1652b	CPSF4L	7.93	4.46321	1.33247	intron	B.1
peaks_nodup_uniq_B.1_infectedAll_fwd_peak_1654	LOC103243107	11.89	4.29654	2.04123	exon	B.1
peaks_nodup_uniq_B.1_infectedAll_fwd_peak_1657b	LOC103243125	23.78	3.09741	2.49806	intergenic	B.1
peaks_nodup_uniq_B.1_infectedAll_fwd_peak_1659	LOC103243125	7.43	7.02585	5.65582	intergenic	B.1
peaks_nodup_uniq_B.1_infectedAll_fwd_peak_1662	LOC103243125	4.46	4.54884	1.86202	intergenic	B.1
peaks_nodup_uniq_B.1_infectedAll_fwd_peak_1663	LOC103243124	11.39	11.6927	16.8901	intergenic	B.1
peaks_nodup_uniq_B.1_infectedAll_fwd_peak_1666	CACNG1	36.16	3.37857	5.71408	exon	B.1
peaks_nodup_uniq_B.1_infectedAll_fwd_peak_1667	CACNG1	17.83	4.09444	3.15658	intron	B.1
peaks_nodup_uniq_B.1_infectedAll_fwd_peak_1669	CEP112	3.47	4.26242	2.67066	intron	B.1
peaks_nodup_uniq_B.1_infectedAll_fwd_peak_1677	TEX2	11.89	4.02801	1.7109	exon	B.1
peaks_nodup_uniq_B.1_infectedAll_fwd_peak_1678	LOC103243203	3.47	4.21491	2.39042	intron	B.1
peaks_nodup_uniq_B.1_infectedAll_fwd_peak_1680	SMARCD2	13.38	3.99329	2.30326	intron	B.1
peaks_nodup_uniq_B.1_infectedAll_fwd_peak_1682	STRADA	21.3	7.43408	9.83165	intron	B.1
peaks_nodup_uniq_B.1_infectedAll_fwd_peak_1689	KANSL1	11.39	4.13141	2.04123	intron	B.1
peaks_nodup_uniq_B.1_infectedAll_fwd_peak_1691	LOC103243256	9.41	4.33859	1.86202	intron	B.1
peaks_nodup_uniq_B.1_infectedAll_fwd_peak_1693	LOC103243252	6.44	5.90493	3.69931	tts	B.1
peaks_nodup_uniq_B.1_infectedAll_fwd_peak_1696	LOC103243248	3.47	4.26242	2.67066	intergenic	B.1
peaks_nodup_uniq_B.1_infectedAll_fwd_peak_1697	LOC103243248	5.45	6.15293	6.06467	intergenic	B.1
peaks_nodup_uniq_B.1_infectedAll_fwd_peak_1698	LOC103243287	14.86	4.95689	3.67695	intron	B.1
peaks_nodup_uniq_B.1_infectedAll_fwd_peak_1699	LOC103243287	18.33	3.71728	2.91224	exon	B.1
peaks_nodup_uniq_B.1_infectedAll_fwd_peak_1700	SPATA32	11.39	4.13141	2.04123	tts	B.1
peaks_nodup_uniq_B.1_infectedAll_fwd_peak_1702	GJC1	37.16	3.46864	6.20156	exon	B.1
peaks_nodup_uniq_B.1_infectedAll_fwd_peak_1703a	GJC1	23.78	2.75325	1.69868	exon	B.1
peaks_nodup_uniq_B.1_infectedAll_fwd_peak_1704	CCDC43	23.28	11.0381	16.0541	tts	B.1
peaks_nodup_uniq_B.1_infectedAll_fwd_peak_1706	ITGA2B	8.42	4.71091	2.09477	intron	B.1
peaks_nodup_uniq_B.1_infectedAll_fwd_peak_1707	ITGA2B	24.27	3.00889	2.61026	exon	B.1
peaks_nodup_uniq_B.1_infectedAll_fwd_peak_1708	ITGA2B	42.11	2.87394	4.9249	exon	B.1
peaks_nodup_uniq_B.1_infectedAll_fwd_peak_1710	GRN	6.44	5.31444	2.67066	tts	B.1
peaks_nodup_uniq_B.1_infectedAll_fwd_peak_1711	UBTF	13.38	4.22819	2.655	promoter-tss	B.1
peaks_nodup_uniq_B.1_infectedAll_fwd_peak_1712	ATXN7L3	9.41	4.64849	2.24889	promoter-tss	B.1
peaks_nodup_uniq_B.1_infectedAll_fwd_peak_1714	LOC103243339	6.44	4.65013	1.73039	intergenic	B.1
peaks_nodup_uniq_B.1_infectedAll_fwd_peak_1716	LOC103243369	6.44	4.76937	1.88912	intron	B.1
peaks_nodup_uniq_B.1_infectedAll_fwd_peak_1717	LOC103243369	26.75	5.55033	8.31697	intron	B.1
peaks_nodup_uniq_B.1_infectedAll_fwd_peak_1718	NBR1	5.94	4.96058	1.66867	intergenic	B.1
peaks_nodup_uniq_B.1_infectedAll_fwd_peak_1719	BRCA1	3.47	3.98911	1.42553	intron	B.1
peaks_nodup_uniq_B.1_infectedAll_fwd_peak_1725	PLEKHH3	10.4	4.48954	2.28192	intron	B.1
peaks_nodup_uniq_B.1_infectedAll_fwd_peak_1726	PLEKHH3	17.83	4.70861	4.14794	intron	B.1
peaks_nodup_uniq_B.1_infectedAll_fwd_peak_1729	STAT3	7.93	4.46321	1.33247	intron	B.1
peaks_nodup_uniq_B.1_infectedAll_fwd_peak_1734	MSL1	12.88	6.94021	5.61698	promoter-tss	B.1
peaks_nodup_uniq_B.1_infectedAll_fwd_peak_1735b	FBXL20	17.34	3.66781	2.66879	exon	B.1
peaks_nodup_uniq_B.1_infectedAll_fwd_peak_1737	FBXL20	20.81	3.63447	3.02126	exon	B.1
peaks_nodup_uniq_B.1_infectedAll_fwd_peak_1740	LOC103243547	6.94	7.57081	7.86778	promoter-tss	B.1
peaks_nodup_uniq_B.1_infectedAll_fwd_peak_1742	TRNAC-GCA	13.38	3.59396	1.7246	intron	B.1
peaks_nodup_uniq_B.1_infectedAll_fwd_peak_1748a	NFE2L1	19.32	3.1751	2.10175	exon	B.1
peaks_nodup_uniq_B.1_infectedAll_fwd_peak_1748b	NFE2L1	30.71	6.09901	10.7936	exon	B.1
peaks_nodup_uniq_B.1_infectedAll_fwd_peak_1749	HOXB8	4.46	4.54884	1.86202	intron	B.1
peaks_nodup_uniq_B.1_infectedAll_fwd_peak_1751	ABI3	10.4	5.70171	3.76479	intergenic	B.1
peaks_nodup_uniq_B.1_infectedAll_fwd_peak_1753	DNAH17	7.93	4.46321	1.33247	intron	B.1
peaks_nodup_uniq_B.1_infectedAll_fwd_peak_1754	USP36	10.4	5.70171	3.76479	exon	B.1
peaks_nodup_uniq_B.1_infectedAll_fwd_peak_1755	USP36	8.92	7.08373	4.82758	intron	B.1
peaks_nodup_uniq_B.1_infectedAll_fwd_peak_1756	LOC103243666	4.46	4.54884	1.86202	intergenic	B.1
peaks_nodup_uniq_B.1_infectedAll_fwd_peak_1757	CBX2	4.46	4.54884	1.86202	exon	B.1
peaks_nodup_uniq_B.1_infectedAll_fwd_peak_1758	RNF213	7.93	4.46321	1.33247	intron	B.1
peaks_nodup_uniq_B.1_infectedAll_fwd_peak_1760	LOC103243696	19.32	3.76308	3.2079	exon	B.1
peaks_nodup_uniq_B.1_infectedAll_fwd_peak_1765b	LOC103243874	13.38	4.22819	2.655	intergenic	B.1
peaks_nodup_uniq_B.1_infectedAll_fwd_peak_1768	BAHCC1	10.4	3.80114	1.40639	exon	B.1
peaks_nodup_uniq_B.1_infectedAll_fwd_peak_1770	CCDC137	15.36	5.84194	5.42411	exon	B.1
peaks_nodup_uniq_B.1_infectedAll_fwd_peak_1772	FOXK2	14.86	5.66501	4.60825	intron	B.1
peaks_nodup_uniq_B.1_infectedAll_fwd_peak_1775a	FOXK2	9.41	5.20631	2.89974	intron	B.1
peaks_nodup_uniq_B.1_infectedAll_fwd_peak_1776a	WDR45B	22.29	3.32758	2.93725	exon	B.1
peaks_nodup_uniq_B.1_infectedAll_fwd_peak_1776c	WDR45B	20.81	2.86932	1.52519	exon	B.1
peaks_nodup_uniq_B.1_infectedAll_fwd_peak_1778	LOC103243788	3.47	4.21491	2.39042	intron	B.1
peaks_nodup_uniq_B.1_infectedAll_fwd_peak_1780	LOC103243794	8.42	4.71091	2.09477	intergenic	B.1
peaks_nodup_uniq_B.1_infectedAll_fwd_peak_1781	LOC103243795	3.47	4.21491	2.39042	intergenic	B.1
peaks_nodup_uniq_B.1_infectedAll_fwd_peak_1782	LOC103244001	13.87	3.71781	1.7246	intergenic	B.1
peaks_nodup_uniq_B.1_infectedAll_fwd_peak_1783	LMBRD1	4.46	4.47427	1.7109	intron	B.1
peaks_nodup_uniq_B.1_infectedAll_fwd_peak_1784	DST	17.34	6.11301	6.44689	intron	B.1
peaks_nodup_uniq_B.1_infectedAll_fwd_peak_1785	DST	10.4	5.70171	3.76479	intron	B.1
peaks_nodup_uniq_B.1_infectedAll_fwd_peak_1788a	LOC103243978	12.39	3.71806	1.70895	exon	B.1
peaks_nodup_uniq_B.1_infectedAll_fwd_peak_1789	LOC103243978	19.32	2.82231	1.40782	intron	B.1
peaks_nodup_uniq_B.1_infectedAll_fwd_peak_1792	GSTA4	9.41	6.50789	4.60775	exon	B.1
peaks_nodup_uniq_B.1_infectedAll_fwd_peak_1796	TNFRSF21	27.25	3.9232	5.34912	exon	B.1
peaks_nodup_uniq_B.1_infectedAll_fwd_peak_1797	TNFRSF21	24.27	3.61066	3.9611	exon	B.1
peaks_nodup_uniq_B.1_infectedAll_fwd_peak_1805b	C17H6orf223	5.45	5.37451	3.02968	tts	B.1
peaks_nodup_uniq_B.1_infectedAll_fwd_peak_1806	MRPS18A	3.96	4.43144	1.42553	intron	B.1
peaks_nodup_uniq_B.1_infectedAll_fwd_peak_1811	LOC103221465	8.42	5.23434	2.72856	exon	B.1
peaks_nodup_uniq_B.1_infectedAll_fwd_peak_1812	MRPS10	7.93	4.46321	1.33247	exon	B.1
peaks_nodup_uniq_B.1_infectedAll_fwd_peak_1814	USP49	6.94	4.95976	1.73039	exon	B.1
peaks_nodup_uniq_B.1_infectedAll_fwd_peak_1817	TFEB	7.93	7.43868	5.65582	promoter-tss	B.1
peaks_nodup_uniq_B.1_infectedAll_fwd_peak_1818	TFEB	7.43	4.21551	1.33247	exon	B.1
peaks_nodup_uniq_B.1_infectedAll_fwd_peak_1819	NFYA	4.46	4.78825	2.49156	promoter-tss	B.1
peaks_nodup_uniq_B.1_infectedAll_fwd_peak_1820	LOC103221545	7.43	7.02585	5.65582	exon	B.1
peaks_nodup_uniq_B.1_infectedAll_fwd_peak_1821	LOC103221545	5.94	5.78734	3.02968	exon	B.1
peaks_nodup_uniq_B.1_infectedAll_fwd_peak_1826	LOC103221560	5.45	4.60672	1.66867	intron	B.1
peaks_nodup_uniq_B.1_infectedAll_fwd_peak_1830	CCDC167	3.47	4.21491	2.39042	intron	B.1
peaks_nodup_uniq_B.1_infectedAll_fwd_peak_1834	SRPK1	19.82	5.20401	5.52473	intron	B.1
peaks_nodup_uniq_B.1_infectedAll_fwd_peak_1836	FKBP5	9.41	7.43759	6.02233	intron	B.1
peaks_nodup_uniq_B.1_infectedAll_fwd_peak_1839	LOC103222327	20.81	7.26895	8.95301	intron	B.1
peaks_nodup_uniq_B.1_infectedAll_fwd_peak_1842	LOC103222327	11.89	6.44481	4.65099	intron	B.1
peaks_nodup_uniq_B.1_infectedAll_fwd_peak_1843	HMGA1	13.38	3.59396	1.7246	intergenic	B.1
peaks_nodup_uniq_B.1_infectedAll_fwd_peak_1844	LOC103221643	5.94	6.62556	6.06467	intron	B.1
peaks_nodup_uniq_B.1_infectedAll_fwd_peak_1845	LOC103221650	41.61	2.36743	2.67066	exon	B.1
peaks_nodup_uniq_B.1_infectedAll_fwd_peak_1846	LOC103221652	14.37	3.84166	2.30038	intron	B.1
peaks_nodup_uniq_B.1_infectedAll_fwd_peak_1848	COL11A2	16.35	5.78275	5.64899	promoter-tss	B.1
peaks_nodup_uniq_B.1_infectedAll_fwd_peak_1850	LOC103222355	3.47	4.26242	2.67066	intergenic	B.1
peaks_nodup_uniq_B.1_infectedAll_fwd_peak_1852	AGPAT1	10.4	3.80114	1.40639	exon	B.1
peaks_nodup_uniq_B.1_infectedAll_fwd_peak_1857	ABHD16A	22.79	4.75769	5.63294	intron	B.1
peaks_nodup_uniq_B.1_infectedAll_fwd_peak_1860	IER3	53.01	1.92885	1.75316	exon	B.1
peaks_nodup_uniq_B.1_infectedAll_fwd_peak_1862	MDC1	15.36	5.1117	4.36182	exon	B.1
peaks_nodup_uniq_B.1_infectedAll_fwd_peak_1864	LOC103221822	9.41	4.64849	2.24889	exon	B.1
peaks_nodup_uniq_B.1_infectedAll_fwd_peak_1866	DHX16	30.71	5.28581	9.06612	exon	B.1
peaks_nodup_uniq_B.1_infectedAll_fwd_peak_1868	PRR3	31.21	2.47771	2.07755	intron	B.1
peaks_nodup_uniq_B.1_infectedAll_fwd_peak_1871	LOC103222329	3.47	4.13686	1.99324	intron	B.1
peaks_nodup_uniq_B.1_infectedAll_fwd_peak_1872	LOC103222330	49.04	2.50224	4.28787	tts	B.1
peaks_nodup_uniq_B.1_infectedAll_fwd_peak_1874	LOC103221842	9.41	7.43759	6.02233	exon	B.1
peaks_nodup_uniq_B.1_infectedAll_fwd_peak_1875	LOC103221880	4.95	4.80162	1.57294	intron	B.1
peaks_nodup_uniq_B.1_infectedAll_fwd_peak_1876	LOC103221879	7.93	4.46321	1.33247	exon	B.1
peaks_nodup_uniq_B.1_infectedAll_fwd_peak_1880	ZSCAN12	5.45	4.60672	1.66867	exon	B.1
peaks_nodup_uniq_B.1_infectedAll_fwd_peak_1881	LOC103221917	3.47	4.26242	2.67066	exon	B.1
peaks_nodup_uniq_B.1_infectedAll_fwd_peak_1882	ZNF184	5.94	4.96058	1.66867	exon	B.1
peaks_nodup_uniq_B.1_infectedAll_fwd_peak_1888	LOC103222008	5.94	5.1827	1.99324	tts	B.1
peaks_nodup_uniq_B.1_infectedAll_fwd_peak_1889	LOC103222016	10.9	5.40856	3.09866	exon	B.1
peaks_nodup_uniq_B.1_infectedAll_fwd_peak_1893	LOC103222051	9.41	5.20631	2.89974	promoter-tss	B.1
peaks_nodup_uniq_B.1_infectedAll_fwd_peak_1897	NUP153	4.46	4.96237	3.02968	intron	B.1
peaks_nodup_uniq_B.1_infectedAll_fwd_peak_1904	ATXN1	17.83	4.70861	4.14794	exon	B.1
peaks_nodup_uniq_B.1_infectedAll_fwd_peak_1908	RANBP9	7.43	4.21551	1.33247	intron	B.1
peaks_nodup_uniq_B.1_infectedAll_fwd_peak_1909	NOL7	4.95	4.80162	1.57294	intron	B.1
peaks_nodup_uniq_B.1_infectedAll_fwd_peak_1910	NOL7	14.86	3.96551	2.30038	exon	B.1
peaks_nodup_uniq_B.1_infectedAll_fwd_peak_1911	SIRT5	4.46	5.05427	3.44109	intergenic	B.1
peaks_nodup_uniq_B.1_infectedAll_fwd_peak_1913	TBC1D7	8.42	4.71091	2.09477	exon	B.1
peaks_nodup_uniq_B.1_infectedAll_fwd_peak_1917	NEDD9	12.88	5.78351	4.15263	exon	B.1
peaks_nodup_uniq_B.1_infectedAll_fwd_peak_1919	NEDD9	11.39	4.13141	2.04123	exon	B.1
peaks_nodup_uniq_B.1_infectedAll_fwd_peak_1920	NEDD9	11.89	6.44481	4.65099	intron	B.1
peaks_nodup_uniq_B.1_infectedAll_fwd_peak_1923	ELOVL2	3.96	4.73505	2.67066	intron	B.1
peaks_nodup_uniq_B.1_infectedAll_fwd_peak_1927	TFAP2A	19.32	4.23347	4.08114	exon	B.1
peaks_nodup_uniq_B.1_infectedAll_fwd_peak_1930	LOC103222204	10.9	5.94941	3.76479	exon	B.1
peaks_nodup_uniq_B.1_infectedAll_fwd_peak_1938	HUS1B	4.46	4.47427	1.7109	intron	B.1
peaks_nodup_uniq_B.1_infectedAll_fwd_peak_1939	LOC103222319	3.47	4.26242	2.67066	intergenic	B.1
peaks_nodup_uniq_B.1_infectedAll_fwd_peak_1940	DUSP22	14.37	3.84166	2.30038	intergenic	B.1
peaks_nodup_uniq_B.1_infectedAll_fwd_peak_1943	RBFA	3.47	4.26242	2.67066	tts	B.1
peaks_nodup_uniq_B.1_infectedAll_fwd_peak_1947	LOC103244027	3.47	4.26242	2.67066	intron	B.1
peaks_nodup_uniq_B.1_infectedAll_fwd_peak_1954b	LOC103244063	7.93	4.95912	1.89469	exon	B.1
peaks_nodup_uniq_B.1_infectedAll_fwd_peak_1960	LOC103244162	12.39	6.69251	5.61698	intron	B.1
peaks_nodup_uniq_B.1_infectedAll_fwd_peak_1964b	LOC103244165	17.34	3.66781	2.66879	exon	B.1
peaks_nodup_uniq_B.1_infectedAll_fwd_peak_1966	LOC103244172	3.96	4.73505	2.67066	intergenic	B.1
peaks_nodup_uniq_B.1_infectedAll_fwd_peak_1968	LOC103244212	9.41	4.73301	2.35114	exon	B.1
peaks_nodup_uniq_B.1_infectedAll_fwd_peak_1969	LOC103244212	37.16	2.11973	1.42512	exon	B.1
peaks_nodup_uniq_B.1_infectedAll_fwd_peak_1970	LOC103244212	3.96	4.59556	1.99324	intron	B.1
peaks_nodup_uniq_B.1_infectedAll_fwd_peak_1972	LOC103244212	31.71	2.97324	3.45342	exon	B.1
peaks_nodup_uniq_B.1_infectedAll_fwd_peak_1973	LOC103244211	5.94	4.96058	1.66867	intron	B.1
peaks_nodup_uniq_B.1_infectedAll_fwd_peak_1974	LOC103244211	16.84	5.94788	5.64899	tts	B.1
peaks_nodup_uniq_B.1_infectedAll_fwd_peak_1975	ATP8B1	11.89	8.05602	6.74379	promoter-tss	B.1
peaks_nodup_uniq_B.1_infectedAll_fwd_peak_1976	NARS	16.35	3.46965	2.09477	exon	B.1
peaks_nodup_uniq_B.1_infectedAll_fwd_peak_1977	NARS	21.3	2.78778	1.63486	exon	B.1
peaks_nodup_uniq_B.1_infectedAll_fwd_peak_1981	MBD2	5.45	4.60672	1.66867	intron	B.1
peaks_nodup_uniq_B.1_infectedAll_fwd_peak_1982	MBD2	7.43	7.02585	5.65582	intron	B.1
peaks_nodup_uniq_B.1_infectedAll_fwd_peak_1983	LOC103222412	19.32	2.90295	1.58946	intron	B.1
peaks_nodup_uniq_B.1_infectedAll_fwd_peak_1990	CCDC11	15.36	4.08936	2.87436	exon	B.1
peaks_nodup_uniq_B.1_infectedAll_fwd_peak_1991	CCDC11	16.35	8.67412	9.61251	intron	B.1
peaks_nodup_uniq_B.1_infectedAll_fwd_peak_1992	ACAA2	11.39	4.13141	2.04123	intron	B.1
peaks_nodup_uniq_B.1_infectedAll_fwd_peak_2000	SMAD2	6.44	6.88909	6.60201	tts	B.1
peaks_nodup_uniq_B.1_infectedAll_fwd_peak_2002	LOC103222468	11.39	9.83669	10.319	intron	B.1
peaks_nodup_uniq_B.1_infectedAll_fwd_peak_2006	ST8SIA5	6.94	5.6683	2.67066	exon	B.1
peaks_nodup_uniq_B.1_infectedAll_fwd_peak_2007	ST8SIA5	3.47	4.06164	1.68584	intergenic	B.1
peaks_nodup_uniq_B.1_infectedAll_fwd_peak_2009	EPG5	11.39	4.13141	2.04123	promoter-tss	B.1
peaks_nodup_uniq_B.1_infectedAll_fwd_peak_2012	LOC103222520	3.47	4.26242	2.67066	intron	B.1
peaks_nodup_uniq_B.1_infectedAll_fwd_peak_2015	ZNF24	10.4	3.80114	1.40639	exon	B.1
peaks_nodup_uniq_B.1_infectedAll_fwd_peak_2018	LOC103222565	9.91	7.79144	6.02233	exon	B.1
peaks_nodup_uniq_B.1_infectedAll_fwd_peak_2019	CDH2	7.43	4.21551	1.33247	promoter-tss	B.1
peaks_nodup_uniq_B.1_infectedAll_fwd_peak_2021	KCTD1	22.79	5.94711	7.67081	exon	B.1
peaks_nodup_uniq_B.1_infectedAll_fwd_peak_2022	LOC103222609	13.87	7.43562	6.5495	exon	B.1
peaks_nodup_uniq_B.1_infectedAll_fwd_peak_2030	ESCO1	8.42	4.71091	2.09477	exon	B.1
peaks_nodup_uniq_B.1_infectedAll_fwd_peak_2032	ROCK1	10.4	3.80114	1.40639	intron	B.1
peaks_nodup_uniq_B.1_infectedAll_fwd_peak_2036a	LOC103222728	3.47	4.06164	1.68584	intron	B.1
peaks_nodup_uniq_B.1_infectedAll_fwd_peak_2036b	LOC103222728	6.44	5.31444	2.67066	intron	B.1
peaks_nodup_uniq_B.1_infectedAll_fwd_peak_2036c	LOC103222728	8.42	4.71091	2.09477	intron	B.1
peaks_nodup_uniq_B.1_infectedAll_fwd_peak_2036d	LOC103222728	8.92	8.26435	7.04255	intron	B.1
peaks_nodup_uniq_B.1_infectedAll_fwd_peak_2036e	LOC103222728	6.94	6.61301	4.32004	intron	B.1
peaks_nodup_uniq_B.1_infectedAll_fwd_peak_2037	RAB12	6.44	5.23959	2.58022	intron	B.1
peaks_nodup_uniq_B.1_infectedAll_fwd_peak_2039	LOC103222742	10.9	8.49916	7.21504	exon	B.1
peaks_nodup_uniq_B.1_infectedAll_fwd_peak_2041	LOC103222742	5.45	5.37451	3.02968	exon	B.1
peaks_nodup_uniq_B.1_infectedAll_fwd_peak_2044	ANKRD12	26.75	5.55033	8.31697	exon	B.1
peaks_nodup_uniq_B.1_infectedAll_fwd_peak_2045a	ANKRD12	39.63	4.23251	8.92309	exon	B.1
peaks_nodup_uniq_B.1_infectedAll_fwd_peak_2045b	ANKRD12	36.16	3.09702	4.79513	exon	B.1
peaks_nodup_uniq_B.1_infectedAll_fwd_peak_2045c	ANKRD12	39.14	3.08744	5.27579	exon	B.1
peaks_nodup_uniq_B.1_infectedAll_fwd_peak_2045d	ANKRD12	22.29	3.32758	2.93725	exon	B.1
peaks_nodup_uniq_B.1_infectedAll_fwd_peak_2047	RALBP1	15.36	4.08936	2.87436	exon	B.1
peaks_nodup_uniq_B.1_infectedAll_fwd_peak_2049	CHMP1B	4.95	5.6803	4.32004	exon	B.1
peaks_nodup_uniq_B.1_infectedAll_fwd_peak_2051	LOC103222792	20.81	4.36137	4.34785	intron	B.1
peaks_nodup_uniq_B.1_infectedAll_fwd_peak_2052	LOC103222797	4.95	4.96168	1.86202	exon	B.1
peaks_nodup_uniq_B.1_infectedAll_fwd_peak_2054	TUBB6	29.23	2.74806	2.66879	exon	B.1
peaks_nodup_uniq_B.1_infectedAll_fwd_peak_2056	CEP192	10.4	3.80114	1.40639	exon	B.1
peaks_nodup_uniq_B.1_infectedAll_fwd_peak_2061	LOC103222833	7.43	6.02216	3.73502	exon	B.1
peaks_nodup_uniq_B.1_infectedAll_fwd_peak_2062	LOC103222863	6.44	4.65013	1.73039	tts	B.1
peaks_nodup_uniq_B.1_infectedAll_fwd_peak_2064	CECR6	9.41	5.20631	2.89974	exon	B.1
peaks_nodup_uniq_B.1_infectedAll_fwd_peak_2075	CRKL	22.29	2.91163	2.04217	exon	B.1
peaks_nodup_uniq_B.1_infectedAll_fwd_peak_2082b	ARVCF	12.39	4.18282	2.3449	exon	B.1
peaks_nodup_uniq_B.1_infectedAll_fwd_peak_2083	ARVCF	15.85	5.26651	4.36182	tts	B.1
peaks_nodup_uniq_B.1_infectedAll_fwd_peak_2089	SLC2A11	4.46	4.54884	1.86202	exon	B.1
peaks_nodup_uniq_B.1_infectedAll_fwd_peak_2090	DDT	8.42	6.4533	4.3937	intron	B.1
peaks_nodup_uniq_B.1_infectedAll_fwd_peak_2092	SUSD2	15.36	3.27149	1.6067	exon	B.1
peaks_nodup_uniq_B.1_infectedAll_fwd_peak_2093a	LOC103223048	22.29	3.32758	2.93725	exon	B.1
peaks_nodup_uniq_B.1_infectedAll_fwd_peak_2096	KIAA1671	14.86	5.28734	4.12138	exon	B.1
peaks_nodup_uniq_B.1_infectedAll_fwd_peak_2097	LOC103223074	7.43	4.21551	1.33247	exon	B.1
peaks_nodup_uniq_B.1_infectedAll_fwd_peak_2098	CRYBB3	5.45	4.60672	1.66867	intron	B.1
peaks_nodup_uniq_B.1_infectedAll_fwd_peak_2104	LOC103223104	15.85	3.37057	1.6067	intergenic	B.1
peaks_nodup_uniq_B.1_infectedAll_fwd_peak_2105	LOC103223113	3.96	4.59556	1.99324	promoter-tss	B.1
peaks_nodup_uniq_B.1_infectedAll_fwd_peak_2109	C19H22orf31	13.38	7.04698	6.37595	exon	B.1
peaks_nodup_uniq_B.1_infectedAll_fwd_peak_2114	LOC103223151	20.31	3.55191	3.02126	exon	B.1
peaks_nodup_uniq_B.1_infectedAll_fwd_peak_2115a	CCDC157	10.9	5.94941	3.76479	exon	B.1
peaks_nodup_uniq_B.1_infectedAll_fwd_peak_2115b	CCDC157	14.37	5.12221	4.12138	exon	B.1
peaks_nodup_uniq_B.1_infectedAll_fwd_peak_2115c	CCDC157	8.42	4.71091	2.09477	exon	B.1
peaks_nodup_uniq_B.1_infectedAll_fwd_peak_2116	CCDC157	5.94	4.89071	1.57943	intron	B.1
peaks_nodup_uniq_B.1_infectedAll_fwd_peak_2119	LOC103223177	21.8	6.99314	8.95301	intergenic	B.1
peaks_nodup_uniq_B.1_infectedAll_fwd_peak_2123	LOC103223178	12.39	3.93677	2.0074	exon	B.1
peaks_nodup_uniq_B.1_infectedAll_fwd_peak_2124	LOC103223180	13.87	6.19635	4.96078	intron	B.1
peaks_nodup_uniq_B.1_infectedAll_fwd_peak_2125	INPP5J	3.47	4.21491	2.39042	intron	B.1
peaks_nodup_uniq_B.1_infectedAll_fwd_peak_2126	LOC103223184	8.92	4.95861	2.09477	exon	B.1
peaks_nodup_uniq_B.1_infectedAll_fwd_peak_2127	LIMK2	4.46	4.54884	1.86202	intron	B.1
peaks_nodup_uniq_B.1_infectedAll_fwd_peak_2133	LOC103223217	3.47	4.06164	1.68584	promoter-tss	B.1
peaks_nodup_uniq_B.1_infectedAll_fwd_peak_2134	TIMP3	3.47	4.21491	2.39042	exon	B.1
peaks_nodup_uniq_B.1_infectedAll_fwd_peak_2135	HMGXB4	11.89	5.85892	3.94577	exon	B.1
peaks_nodup_uniq_B.1_infectedAll_fwd_peak_2136b	HMOX1	13.87	3.71781	1.7246	intron	B.1
peaks_nodup_uniq_B.1_infectedAll_fwd_peak_2137	HMOX1	11.39	6.19711	4.65099	intron	B.1
peaks_nodup_uniq_B.1_infectedAll_fwd_peak_2138	HMOX1	12.88	4.33763	2.3449	promoter-tss	B.1
peaks_nodup_uniq_B.1_infectedAll_fwd_peak_2139a	LOC103223232	7.43	4.21551	1.33247	intergenic	B.1
peaks_nodup_uniq_B.1_infectedAll_fwd_peak_2139b	LOC103223232	8.42	7.85152	7.04255	intergenic	B.1
peaks_nodup_uniq_B.1_infectedAll_fwd_peak_2142	LOC103223252	3.47	4.26242	2.67066	intron	B.1
peaks_nodup_uniq_B.1_infectedAll_fwd_peak_2143	PVALB	6.44	7.09818	7.86778	intergenic	B.1
peaks_nodup_uniq_B.1_infectedAll_fwd_peak_2145	CDC42EP1	34.68	2.74447	3.16872	exon	B.1
peaks_nodup_uniq_B.1_infectedAll_fwd_peak_2147	LOC103223291	4.46	4.54884	1.86202	exon	B.1
peaks_nodup_uniq_B.1_infectedAll_fwd_peak_2148	LOC103223292	41.61	2.56709	3.46338	exon	B.1
peaks_nodup_uniq_B.1_infectedAll_fwd_peak_2149	C19H22orf23	15.85	3.37057	1.6067	intron	B.1
peaks_nodup_uniq_B.1_infectedAll_fwd_peak_2155	LOC103223323	7.93	4.46321	1.33247	exon	B.1
peaks_nodup_uniq_B.1_infectedAll_fwd_peak_2161	PDGFB	3.96	4.73505	2.67066	intergenic	B.1
peaks_nodup_uniq_B.1_infectedAll_fwd_peak_2164	TNRC6B	11.39	10.3285	11.5029	exon	B.1
peaks_nodup_uniq_B.1_infectedAll_fwd_peak_2165	TNRC6B	15.85	4.68134	3.56463	exon	B.1
peaks_nodup_uniq_B.1_infectedAll_fwd_peak_2166a	TNRC6B	12.88	5.33863	3.60368	exon	B.1
peaks_nodup_uniq_B.1_infectedAll_fwd_peak_2166b	TNRC6B	10.9	3.96627	1.40639	exon	B.1
peaks_nodup_uniq_B.1_infectedAll_fwd_peak_2167	ADSL	5.94	4.96058	1.66867	exon	B.1
peaks_nodup_uniq_B.1_infectedAll_fwd_peak_2170	LOC103223372	31.71	2.33612	1.52005	intron	B.1
peaks_nodup_uniq_B.1_infectedAll_fwd_peak_2171	LOC103223372	25.76	2.8469	2.20206	exon	B.1
peaks_nodup_uniq_B.1_infectedAll_fwd_peak_2172	LOC103223372	24.27	3.41549	3.52519	exon	B.1
peaks_nodup_uniq_B.1_infectedAll_fwd_peak_2174	TEF	17.34	3.05651	1.57294	exon	B.1
peaks_nodup_uniq_B.1_infectedAll_fwd_peak_2175	POLR3H	3.47	4.26242	2.67066	promoter-tss	B.1
peaks_nodup_uniq_B.1_infectedAll_fwd_peak_2177	LOC103223411	4.95	5.6803	4.32004	intron	B.1
peaks_nodup_uniq_B.1_infectedAll_fwd_peak_2179	LOC103223431	8.42	7.85152	7.04255	intergenic	B.1
peaks_nodup_uniq_B.1_infectedAll_fwd_peak_2182	NUP50	36.16	3.09702	4.79513	exon	B.1
peaks_nodup_uniq_B.1_infectedAll_fwd_peak_2185a	UPK3A	13.38	3.59396	1.7246	intron	B.1
peaks_nodup_uniq_B.1_infectedAll_fwd_peak_2185b	UPK3A	9.41	6.50789	4.60775	intron	B.1
peaks_nodup_uniq_B.1_infectedAll_fwd_peak_2187	CDPF1	5.45	6.08435	5.62483	exon	B.1
peaks_nodup_uniq_B.1_infectedAll_fwd_peak_2188	TRMU	13.38	4.79194	3.38877	tts	B.1
peaks_nodup_uniq_B.1_infectedAll_fwd_peak_2197	LOC103223531	6.94	6.84105	4.85126	intergenic	B.1
peaks_nodup_uniq_B.1_infectedAll_fwd_peak_2205a	PPP6R2	7.43	5.26939	2.66879	intergenic	B.1
peaks_nodup_uniq_B.1_infectedAll_fwd_peak_2205b	PPP6R2	8.42	5.88864	3.60416	intergenic	B.1
peaks_nodup_uniq_B.1_infectedAll_fwd_peak_2205c	PPP6R2	11.39	5.63374	3.94577	intergenic	B.1
peaks_nodup_uniq_B.1_infectedAll_fwd_peak_2205d	PPP6R2	13.38	7.18791	6.5495	intergenic	B.1
peaks_nodup_uniq_B.1_infectedAll_fwd_peak_2209	LOC103248979	7.93	6.37601	3.73502	exon	B.1
peaks_nodup_uniq_B.1_infectedAll_fwd_peak_2210	LOC103242515	8.92	7.08373	4.82758	intron	B.1
peaks_nodup_uniq_B.1_infectedAll_fwd_peak_2216	KCNQ2	12.39	4.46168	2.67743	intergenic	B.1
peaks_nodup_uniq_B.1_infectedAll_fwd_peak_2217	YTHDF1	23.28	2.63955	1.56445	exon	B.1
peaks_nodup_uniq_B.1_infectedAll_fwd_peak_2218	YTHDF1	25.27	2.62655	1.77339	exon	B.1
peaks_nodup_uniq_B.1_infectedAll_fwd_peak_2220	LOC103242961	40.62	2.44841	2.87436	exon	B.1
peaks_nodup_uniq_B.1_infectedAll_fwd_peak_2222	LOC103242961	48.55	2.60786	4.51237	exon	B.1
peaks_nodup_uniq_B.1_infectedAll_fwd_peak_2226	DPH3P1	7.43	7.02585	5.65582	intron	B.1
peaks_nodup_uniq_B.1_infectedAll_fwd_peak_2227	ADRM1	8.92	5.63478	2.89536	intron	B.1
peaks_nodup_uniq_B.1_infectedAll_fwd_peak_2228	LOC103243202	7.93	4.46321	1.33247	exon	B.1
peaks_nodup_uniq_B.1_infectedAll_fwd_peak_2229	CTSZ	23.28	3.11331	2.67066	tts	B.1
peaks_nodup_uniq_B.1_infectedAll_fwd_peak_2232	ZBP1	5.45	4.54184	1.57943	intron	B.1
peaks_nodup_uniq_B.1_infectedAll_fwd_peak_2233	ZBP1	33.19	3.10835	4.32004	exon	B.1
peaks_nodup_uniq_B.1_infectedAll_fwd_peak_2240	ZNF217	28.24	5.84757	9.75911	exon	B.1
peaks_nodup_uniq_B.1_infectedAll_fwd_peak_2242	KCNG1	9.91	5.45401	2.89974	exon	B.1
peaks_nodup_uniq_B.1_infectedAll_fwd_peak_2245	ADNP	5.45	5.37451	3.02968	intron	B.1
peaks_nodup_uniq_B.1_infectedAll_fwd_peak_2247	PTPN1	4.46	4.96237	3.02968	intergenic	B.1
peaks_nodup_uniq_B.1_infectedAll_fwd_peak_2248	SPATA2	19.32	6.3502	7.48916	exon	B.1
peaks_nodup_uniq_B.1_infectedAll_fwd_peak_2250	PTGIS	27.74	2.87425	2.59557	exon	B.1
peaks_nodup_uniq_B.1_infectedAll_fwd_peak_2255	STAU1	24.77	3.22126	2.91293	exon	B.1
peaks_nodup_uniq_B.1_infectedAll_fwd_peak_2256	ARFGEF2	7.93	4.46321	1.33247	promoter-tss	B.1
peaks_nodup_uniq_B.1_infectedAll_fwd_peak_2259a	SULF2	33.19	2.44228	2.18304	exon	B.1
peaks_nodup_uniq_B.1_infectedAll_fwd_peak_2263	ZMYND8	13.38	3.59396	1.7246	exon	B.1
peaks_nodup_uniq_B.1_infectedAll_fwd_peak_2272	NCOA5	9.41	5.20631	2.89974	intron	B.1
peaks_nodup_uniq_B.1_infectedAll_fwd_peak_2273	NCOA5	15.36	3.27149	1.6067	exon	B.1
peaks_nodup_uniq_B.1_infectedAll_fwd_peak_2276	RBPJL	7.43	4.21551	1.33247	tts	B.1
peaks_nodup_uniq_B.1_infectedAll_fwd_peak_2278	CHD6	44.09	3.46852	7.61468	exon	B.1
peaks_nodup_uniq_B.1_infectedAll_fwd_peak_2280	EMILIN3	10.9	3.96627	1.40639	exon	B.1
peaks_nodup_uniq_B.1_infectedAll_fwd_peak_2283	ZHX3	10.4	3.80114	1.40639	exon	B.1
peaks_nodup_uniq_B.1_infectedAll_fwd_peak_2286	TGM2	5.45	5.65738	3.79536	promoter-tss	B.1
peaks_nodup_uniq_B.1_infectedAll_fwd_peak_2287	JAG1	31.71	4.67224	7.95345	exon	B.1
peaks_nodup_uniq_B.1_infectedAll_fwd_peak_2288	LOC103246651	24.27	5.05493	6.93405	exon	B.1
peaks_nodup_uniq_B.1_infectedAll_fwd_peak_2289	LOC103246674	26.26	5.45125	8.31697	exon	B.1
peaks_nodup_uniq_B.1_infectedAll_fwd_peak_2290	LOC103246674	7.43	4.21551	1.33247	exon	B.1
peaks_nodup_uniq_B.1_infectedAll_fwd_peak_2292	TRMT6	11.89	6.44481	4.65099	exon	B.1
peaks_nodup_uniq_B.1_infectedAll_fwd_peak_2294	SLC23A2	10.4	3.80114	1.40639	intron	B.1
peaks_nodup_uniq_B.1_infectedAll_fwd_peak_2295	RASSF2	12.88	4.62681	2.67743	intron	B.1
peaks_nodup_uniq_B.1_infectedAll_fwd_peak_2296	PRNP	7.93	4.46321	1.33247	intergenic	B.1
peaks_nodup_uniq_B.1_infectedAll_fwd_peak_2298	LOC103247003	4.95	5.6803	4.32004	intergenic	B.1
peaks_nodup_uniq_B.1_infectedAll_fwd_peak_2299	MRPS26	21.8	2.84971	1.63486	tts	B.1
peaks_nodup_uniq_B.1_infectedAll_fwd_peak_2301	LOC103247379	4.46	4.54884	1.86202	intron	B.1
peaks_nodup_uniq_B.1_infectedAll_fwd_peak_2305a	ZCCHC3	5.94	5.78734	3.02968	exon	B.1
peaks_nodup_uniq_B.1_infectedAll_fwd_peak_2306b	SOX12	19.82	2.97372	1.58946	exon	B.1
peaks_nodup_uniq_B.1_infectedAll_fwd_peak_2309	RBCK1	5.45	4.96109	2.24285	intergenic	B.1
peaks_nodup_uniq_B.1_infectedAll_fwd_peak_2313	LOC103248044	23.28	4.49701	5.61513	intron	B.1
peaks_nodup_uniq_B.1_infectedAll_fwd_peak_2316	LOC103248163	8.42	4.71091	2.09477	exon	B.1
peaks_nodup_uniq_B.1_infectedAll_fwd_peak_2317	KIF3B	7.43	4.21551	1.33247	exon	B.1
peaks_nodup_uniq_B.1_infectedAll_fwd_peak_2319	KIF3B	24.27	8.42488	12.6663	exon	B.1
peaks_nodup_uniq_B.1_infectedAll_fwd_peak_2323a	NOL4L	28.73	2.97333	2.96743	exon	B.1
peaks_nodup_uniq_B.1_infectedAll_fwd_peak_2324	NOL4L	29.23	2.79895	2.76446	exon	B.1
peaks_nodup_uniq_B.1_infectedAll_fwd_peak_2327	C2H20orf144	8.42	5.88864	3.60416	exon	B.1
peaks_nodup_uniq_B.1_infectedAll_fwd_peak_2328	C2H20orf144	7.93	6.37601	3.73502	exon	B.1
peaks_nodup_uniq_B.1_infectedAll_fwd_peak_2329	CHMP4B	15.36	3.27149	1.6067	intron	B.1
peaks_nodup_uniq_B.1_infectedAll_fwd_peak_2330	LOC103214292	5.45	5.55984	3.52315	intron	B.1
peaks_nodup_uniq_B.1_infectedAll_fwd_peak_2331	DYNLRB1	4.46	4.7057	2.25057	intron	B.1
peaks_nodup_uniq_B.1_infectedAll_fwd_peak_2332	ACSS2	6.44	5.31444	2.67066	intron	B.1
peaks_nodup_uniq_B.1_infectedAll_fwd_peak_2338	MACROD2	4.46	5.20768	4.32004	exon	B.1
peaks_nodup_uniq_B.1_infectedAll_fwd_peak_2340	CSRP2BP	19.32	5.08016	5.52473	promoter-tss	B.1
peaks_nodup_uniq_B.1_infectedAll_fwd_peak_2341	CSRP2BP	13.87	3.71781	1.7246	exon	B.1
peaks_nodup_uniq_B.1_infectedAll_fwd_peak_2343	CSRP2BP	16.84	5.94788	5.64899	exon	B.1
peaks_nodup_uniq_B.1_infectedAll_fwd_peak_2344	CSRP2BP	5.94	5.78734	3.02968	exon	B.1
peaks_nodup_uniq_B.1_infectedAll_fwd_peak_2347	NAA20	13.38	5.52917	4.35689	exon	B.1
peaks_nodup_uniq_B.1_infectedAll_fwd_peak_2360	CEP250	4.46	4.7057	2.25057	intron	B.1
peaks_nodup_uniq_B.1_infectedAll_fwd_peak_2361	LOC103216130	9.91	4.95819	2.35114	exon	B.1
peaks_nodup_uniq_B.1_infectedAll_fwd_peak_2367	CNBD2	25.76	4.46014	5.8634	exon	B.1
peaks_nodup_uniq_B.1_infectedAll_fwd_peak_2371b	DLGAP4	8.42	6.72987	4.82758	intron	B.1
peaks_nodup_uniq_B.1_infectedAll_fwd_peak_2372	DLGAP4	7.43	6.02216	3.73502	intron	B.1
peaks_nodup_uniq_B.1_infectedAll_fwd_peak_2373	DLGAP4	5.45	4.60672	1.66867	intron	B.1
peaks_nodup_uniq_B.1_infectedAll_fwd_peak_2381	GART	6.94	5.2208	2.05981	intron	B.1
peaks_nodup_uniq_B.1_infectedAll_fwd_peak_2382	DNAJC28	3.47	4.26242	2.67066	exon	B.1
peaks_nodup_uniq_B.1_infectedAll_fwd_peak_2384	PAXBP1	13.87	7.43562	6.5495	intron	B.1
peaks_nodup_uniq_B.1_infectedAll_fwd_peak_2387	C2H21orf59	8.92	4.50783	1.6067	tts	B.1
peaks_nodup_uniq_B.1_infectedAll_fwd_peak_2389	C2H21orf59	4.46	4.4021	1.57294	intron	B.1
peaks_nodup_uniq_B.1_infectedAll_fwd_peak_2392	SCAF4	12.39	3.93677	2.0074	promoter-tss	B.1
peaks_nodup_uniq_B.1_infectedAll_fwd_peak_2393a	SOD1	43.1	2.00454	1.42497	exon	B.1
peaks_nodup_uniq_B.1_infectedAll_fwd_peak_2395a	ADAMTS1	24.77	2.86334	2.09477	exon	B.1
peaks_nodup_uniq_B.1_infectedAll_fwd_peak_2397	ADAMTS1	40.13	2.11997	1.68584	exon	B.1
peaks_nodup_uniq_B.1_infectedAll_fwd_peak_2398	LOC103217748	3.47	4.26242	2.67066	intergenic	B.1
peaks_nodup_uniq_B.1_infectedAll_fwd_peak_2402b	NRIP1	21.8	2.71401	1.33247	tts	B.1
peaks_nodup_uniq_B.1_infectedAll_fwd_peak_2403c	NRIP1	19.82	2.89112	1.40782	exon	B.1
peaks_nodup_uniq_B.1_infectedAll_fwd_peak_2404	NRIP1	28.73	4.95554	7.74419	exon	B.1
peaks_nodup_uniq_B.1_infectedAll_fwd_peak_2405	HSPA13	27.25	3.53088	4.36363	exon	B.1
peaks_nodup_uniq_B.1_infectedAll_fwd_peak_2406	RBM11	4.46	4.54884	1.86202	intergenic	B.1
peaks_nodup_uniq_B.1_infectedAll_fwd_peak_2407	CLIC6	4.95	5.6803	4.32004	exon	B.1
peaks_nodup_uniq_B.1_infectedAll_fwd_peak_2410a	CHAF1B	27.25	3.53088	4.36363	exon	B.1
peaks_nodup_uniq_B.1_infectedAll_fwd_peak_2411	CHAF1B	3.47	4.13686	1.99324	intron	B.1
peaks_nodup_uniq_B.1_infectedAll_fwd_peak_2413	LOC103218684	15.36	3.27149	1.6067	exon	B.1
peaks_nodup_uniq_B.1_infectedAll_fwd_peak_2414	DYRK1A	29.72	2.56034	1.9766	promoter-tss	B.1
peaks_nodup_uniq_B.1_infectedAll_fwd_peak_2415	DYRK1A	33.19	4.07046	7.12611	promoter-tss	B.1
peaks_nodup_uniq_B.1_infectedAll_fwd_peak_2417	DYRK1A	16.35	4.81895	4.24986	intron	B.1
peaks_nodup_uniq_B.1_infectedAll_fwd_peak_2418	DYRK1A	10.9	4.95784	2.62196	intron	B.1
peaks_nodup_uniq_B.1_infectedAll_fwd_peak_2420	LOC103218741	27.25	2.82471	2.59557	exon	B.1
peaks_nodup_uniq_B.1_infectedAll_fwd_peak_2422	ETS2	26.75	2.8318	2.32126	exon	B.1
peaks_nodup_uniq_B.1_infectedAll_fwd_peak_2429	LOC103221098	6.44	5.31444	2.67066	intergenic	B.1
peaks_nodup_uniq_B.1_infectedAll_fwd_peak_2433	PDE9A	8.92	4.50783	1.6067	intron	B.1
peaks_nodup_uniq_B.1_infectedAll_fwd_peak_2434	PDE9A	3.96	4.73505	2.67066	intron	B.1
peaks_nodup_uniq_B.1_infectedAll_fwd_peak_2435	PDE9A	3.47	4.26242	2.67066	intron	B.1
peaks_nodup_uniq_B.1_infectedAll_fwd_peak_2442a	LOC103221116	6.94	7.57081	7.86778	intergenic	B.1
peaks_nodup_uniq_B.1_infectedAll_fwd_peak_2442b	LOC103221116	4.46	5.20768	4.32004	intergenic	B.1
peaks_nodup_uniq_B.1_infectedAll_fwd_peak_2443	LOC103219660	8.92	4.95861	2.09477	tts	B.1
peaks_nodup_uniq_B.1_infectedAll_fwd_peak_2445	PWP2	10.9	3.96627	1.40639	exon	B.1
peaks_nodup_uniq_B.1_infectedAll_fwd_peak_2452	LOC103220073	4.46	5.20768	4.32004	intergenic	B.1
peaks_nodup_uniq_B.1_infectedAll_fwd_peak_2457	LOC103220184	11.39	5.84633	4.23104	exon	B.1
peaks_nodup_uniq_B.1_infectedAll_fwd_peak_2458a	PCBP3	5.94	6.62556	6.06467	intergenic	B.1
peaks_nodup_uniq_B.1_infectedAll_fwd_peak_2463	FTCD	9.91	5.45401	2.89974	exon	B.1
peaks_nodup_uniq_B.1_infectedAll_fwd_peak_2464	FTCD	17.34	4.58476	4.14794	exon	B.1
peaks_nodup_uniq_B.1_infectedAll_fwd_peak_2465	LOC103220401	14.37	7.68332	7.55213	intron	B.1
peaks_nodup_uniq_B.1_infectedAll_fwd_peak_2466	LOC103220401	10.4	5.70171	3.76479	intron	B.1
peaks_nodup_uniq_B.1_infectedAll_fwd_peak_2467	DIP2A	7.93	6.37601	3.73502	exon	B.1
peaks_nodup_uniq_B.1_infectedAll_fwd_peak_2471	OLFML2B	7.93	4.46321	1.33247	intron	B.1
peaks_nodup_uniq_B.1_infectedAll_fwd_peak_2473	ADAMTS4	4.46	5.14963	3.94577	exon	B.1
peaks_nodup_uniq_B.1_infectedAll_fwd_peak_2474	DEDD	17.83	6.27815	6.44689	promoter-tss	B.1
peaks_nodup_uniq_B.1_infectedAll_fwd_peak_2478	NCSTN	16.84	3.56873	2.09477	intron	B.1
peaks_nodup_uniq_B.1_infectedAll_fwd_peak_2479	DCAF8	8.42	4.71091	2.09477	intergenic	B.1
peaks_nodup_uniq_B.1_infectedAll_fwd_peak_2480	LOC103223726	8.92	4.95861	2.09477	exon	B.1
peaks_nodup_uniq_B.1_infectedAll_fwd_peak_2483	ARHGEF11	12.88	4.62681	2.67743	promoter-tss	B.1
peaks_nodup_uniq_B.1_infectedAll_fwd_peak_2485	HDGF	18.33	4.83246	4.79696	promoter-tss	B.1
peaks_nodup_uniq_B.1_infectedAll_fwd_peak_2490	APOA1BP	26.26	4.54271	6.48169	exon	B.1
peaks_nodup_uniq_B.1_infectedAll_fwd_peak_2491	LOC103223862	21.8	6.70519	8.50051	exon	B.1
peaks_nodup_uniq_B.1_infectedAll_fwd_peak_2492	LOC103223864	7.93	5.44294	2.49439	intron	B.1
peaks_nodup_uniq_B.1_infectedAll_fwd_peak_2495	LOC103223876	7.43	4.21551	1.33247	exon	B.1
peaks_nodup_uniq_B.1_infectedAll_fwd_peak_2496	DAP3	8.92	4.95861	2.09477	promoter-tss	B.1
peaks_nodup_uniq_B.1_infectedAll_fwd_peak_2497	LOC103223872	20.31	4.26229	4.34785	exon	B.1
peaks_nodup_uniq_B.1_infectedAll_fwd_peak_2499b	ASH1L	28.24	2.92379	2.96743	exon	B.1
peaks_nodup_uniq_B.1_infectedAll_fwd_peak_2500	LOC103225871	6.94	5.6683	2.67066	promoter-tss	B.1
peaks_nodup_uniq_B.1_infectedAll_fwd_peak_2502	THBS3	3.47	4.26242	2.67066	tts	B.1
peaks_nodup_uniq_B.1_infectedAll_fwd_peak_2505	PBXIP1	24.77	3.68144	3.9611	exon	B.1
peaks_nodup_uniq_B.1_infectedAll_fwd_peak_2507	ADAR	15.36	3.89463	2.617	exon	B.1
peaks_nodup_uniq_B.1_infectedAll_fwd_peak_2510	UBE2Q1	27.25	3.53088	4.36363	exon	B.1
peaks_nodup_uniq_B.1_infectedAll_fwd_peak_2518	RBM8A	8.92	5.11197	2.30038	tts	B.1
peaks_nodup_uniq_B.1_infectedAll_fwd_peak_2519	ANKRD35	4.46	5.20768	4.32004	exon	B.1
peaks_nodup_uniq_B.1_infectedAll_fwd_peak_2523	ADAM30	17.34	3.05651	1.57294	exon	B.1
peaks_nodup_uniq_B.1_infectedAll_fwd_peak_2525	ADAM30	36.66	4.82816	9.79297	exon	B.1
peaks_nodup_uniq_B.1_infectedAll_fwd_peak_2526	ZNF697	15.36	5.45248	4.83639	intron	B.1
peaks_nodup_uniq_B.1_infectedAll_fwd_peak_2529	TBX15	10.4	8.1453	7.21504	tts	B.1
peaks_nodup_uniq_B.1_infectedAll_fwd_peak_2530	TBX15	16.35	7.22843	7.6425	exon	B.1
peaks_nodup_uniq_B.1_infectedAll_fwd_peak_2531	CD58	4.95	5.61699	3.94577	exon	B.1
peaks_nodup_uniq_B.1_infectedAll_fwd_peak_2538	DENND2C	5.45	5.55984	3.52315	exon	B.1
peaks_nodup_uniq_B.1_infectedAll_fwd_peak_2539	BCAS2	8.92	4.95861	2.09477	promoter-tss	B.1
peaks_nodup_uniq_B.1_infectedAll_fwd_peak_2541	TRIM33	13.38	3.59396	1.7246	promoter-tss	B.1
peaks_nodup_uniq_B.1_infectedAll_fwd_peak_2545	PHTF1	23.78	3.53989	3.45086	exon	B.1
peaks_nodup_uniq_B.1_infectedAll_fwd_peak_2546	LOC103224197	28.73	2.70302	2.25057	exon	B.1
peaks_nodup_uniq_B.1_infectedAll_fwd_peak_2547	DRAM2	8.92	4.95861	2.09477	exon	B.1
peaks_nodup_uniq_B.1_infectedAll_fwd_peak_2548b	LRIF1	7.93	6.11398	3.35321	exon	B.1
peaks_nodup_uniq_B.1_infectedAll_fwd_peak_2551	LOC103224319	7.43	4.21551	1.33247	promoter-tss	B.1
peaks_nodup_uniq_B.1_infectedAll_fwd_peak_2552	LOC103224334	9.41	5.78479	3.65216	exon	B.1
peaks_nodup_uniq_B.1_infectedAll_fwd_peak_2558	F3	4.46	4.78825	2.49156	intron	B.1
peaks_nodup_uniq_B.1_infectedAll_fwd_peak_2561	ABCA4	44.09	2.65239	4.32004	exon	B.1
peaks_nodup_uniq_B.1_infectedAll_fwd_peak_2562	LOC103224410	3.47	4.13686	1.99324	exon	B.1
peaks_nodup_uniq_B.1_infectedAll_fwd_peak_2563	LOC103224410	3.47	4.26242	2.67066	exon	B.1
peaks_nodup_uniq_B.1_infectedAll_fwd_peak_2566	BCAR3	9.41	5.20631	2.89974	promoter-tss	B.1
peaks_nodup_uniq_B.1_infectedAll_fwd_peak_2567	BCAR3	14.86	4.95689	3.67695	exon	B.1
peaks_nodup_uniq_B.1_infectedAll_fwd_peak_2570	LOC103224428	13.87	7.43562	6.5495	intron	B.1
peaks_nodup_uniq_B.1_infectedAll_fwd_peak_2573	ZNF644	11.89	6.44481	4.65099	exon	B.1
peaks_nodup_uniq_B.1_infectedAll_fwd_peak_2575	LRRC8D	4.46	4.7057	2.25057	promoter-tss	B.1
peaks_nodup_uniq_B.1_infectedAll_fwd_peak_2576	GBP2	7.43	4.21551	1.33247	intron	B.1
peaks_nodup_uniq_B.1_infectedAll_fwd_peak_2578	CCBL2	6.94	5.6683	2.67066	exon	B.1
peaks_nodup_uniq_B.1_infectedAll_fwd_peak_2583	ZNHIT6	37.65	2.27356	1.89469	exon	B.1
peaks_nodup_uniq_B.1_infectedAll_fwd_peak_2585	DDAH1	3.96	4.73505	2.67066	intron	B.1
peaks_nodup_uniq_B.1_infectedAll_fwd_peak_2589	SYDE2	13.38	7.18791	6.5495	exon	B.1
peaks_nodup_uniq_B.1_infectedAll_fwd_peak_2591	SSX2IP	6.44	6.20018	4.32004	intron	B.1
peaks_nodup_uniq_B.1_infectedAll_fwd_peak_2594	TTLL7	4.46	5.20768	4.32004	intron	B.1
peaks_nodup_uniq_B.1_infectedAll_fwd_peak_2595	TTLL7	5.45	5.97168	4.9662	exon	B.1
peaks_nodup_uniq_B.1_infectedAll_fwd_peak_2597	ZZZ3	22.29	2.91163	2.04217	exon	B.1
peaks_nodup_uniq_B.1_infectedAll_fwd_peak_2598	ZZZ3	11.39	5.63374	3.94577	exon	B.1
peaks_nodup_uniq_B.1_infectedAll_fwd_peak_2603	LOC103224611	3.96	4.43144	1.42553	intron	B.1
peaks_nodup_uniq_B.1_infectedAll_fwd_peak_2607	SRSF11	25.27	2.62655	1.77339	exon	B.1
peaks_nodup_uniq_B.1_infectedAll_fwd_peak_2609	GADD45A	3.47	3.98911	1.42553	intron	B.1
peaks_nodup_uniq_B.1_infectedAll_fwd_peak_2613	SERBP1	20.81	3.11526	2.0272	exon	B.1
peaks_nodup_uniq_B.1_infectedAll_fwd_peak_2615	NFIA	5.45	5.37451	3.02968	exon	B.1
peaks_nodup_uniq_B.1_infectedAll_fwd_peak_2616	NFIA	3.47	4.21491	2.39042	intron	B.1
peaks_nodup_uniq_B.1_infectedAll_fwd_peak_2617	MYSM1	17.34	3.66781	2.66879	promoter-tss	B.1
peaks_nodup_uniq_B.1_infectedAll_fwd_peak_2619	LOC103224735	4.46	4.87376	2.71768	intron	B.1
peaks_nodup_uniq_B.1_infectedAll_fwd_peak_2620	C8B	9.91	6.06001	3.65216	exon	B.1
peaks_nodup_uniq_B.1_infectedAll_fwd_peak_2622	LOC103224741	7.43	6.4854	4.5127	promoter-tss	B.1
peaks_nodup_uniq_B.1_infectedAll_fwd_peak_2626	PCSK9	15.36	4.08936	2.87436	exon	B.1
peaks_nodup_uniq_B.1_infectedAll_fwd_peak_2627	PARS2	11.89	6.44481	4.65099	exon	B.1
peaks_nodup_uniq_B.1_infectedAll_fwd_peak_2629	SSBP3	8.42	7.47763	6.19675	promoter-tss	B.1
peaks_nodup_uniq_B.1_infectedAll_fwd_peak_2631	LOC103224780	7.43	6.02216	3.73502	intergenic	B.1
peaks_nodup_uniq_B.1_infectedAll_fwd_peak_2635	DMRTB1	3.47	4.26242	2.67066	exon	B.1
peaks_nodup_uniq_B.1_infectedAll_fwd_peak_2638	LOC103224805	6.44	6.20018	4.32004	exon	B.1
peaks_nodup_uniq_B.1_infectedAll_fwd_peak_2639	ZCCHC11	9.41	5.20631	2.89974	intron	B.1
peaks_nodup_uniq_B.1_infectedAll_fwd_peak_2640b	ZCCHC11	12.39	3.52238	1.42512	exon	B.1
peaks_nodup_uniq_B.1_infectedAll_fwd_peak_2642	ORC1	10.4	8.1453	7.21504	exon	B.1
peaks_nodup_uniq_B.1_infectedAll_fwd_peak_2643	KTI12	13.87	3.71781	1.7246	exon	B.1
peaks_nodup_uniq_B.1_infectedAll_fwd_peak_2644	KTI12	13.87	3.71781	1.7246	exon	B.1
peaks_nodup_uniq_B.1_infectedAll_fwd_peak_2648	CDKN2C	4.95	5.61699	3.94577	intergenic	B.1
peaks_nodup_uniq_B.1_infectedAll_fwd_peak_2652	TRABD2B	7.43	4.21551	1.33247	intron	B.1
peaks_nodup_uniq_B.1_infectedAll_fwd_peak_2654	LOC103224858	5.94	6.62556	6.06467	intergenic	B.1
peaks_nodup_uniq_B.1_infectedAll_fwd_peak_2656	TAL1	5.94	5.34216	2.24285	exon	B.1
peaks_nodup_uniq_B.1_infectedAll_fwd_peak_2657	TAL1	13.87	3.71781	1.7246	exon	B.1
peaks_nodup_uniq_B.1_infectedAll_fwd_peak_2659	NSUN4	5.94	5.42564	2.38787	intron	B.1
peaks_nodup_uniq_B.1_infectedAll_fwd_peak_2660	NSUN4	26.26	10.4832	16.7475	intergenic	B.1
peaks_nodup_uniq_B.1_infectedAll_fwd_peak_2665	UROD	7.93	4.46321	1.33247	exon	B.1
peaks_nodup_uniq_B.1_infectedAll_fwd_peak_2671	LOC103224990	3.47	4.13686	1.99324	intergenic	B.1
peaks_nodup_uniq_B.1_infectedAll_fwd_peak_2672	FOXJ3	6.44	5.31444	2.67066	intron	B.1
peaks_nodup_uniq_B.1_infectedAll_fwd_peak_2673	GUCA2A	31.71	2.51582	2.07755	exon	B.1
peaks_nodup_uniq_B.1_infectedAll_fwd_peak_2674	HIVEP3	4.95	4.96168	1.86202	intron	B.1
peaks_nodup_uniq_B.1_infectedAll_fwd_peak_2679	EDN2	10.4	8.1453	7.21504	exon	B.1
peaks_nodup_uniq_B.1_infectedAll_fwd_peak_2680	EDN2	5.94	4.96058	1.66867	exon	B.1
peaks_nodup_uniq_B.1_infectedAll_fwd_peak_2682	MACF1	4.46	5.20768	4.32004	intron	B.1
peaks_nodup_uniq_B.1_infectedAll_fwd_peak_2683	LOC103225082	11.89	4.02801	1.7109	exon	B.1
peaks_nodup_uniq_B.1_infectedAll_fwd_peak_2685	DNALI1	22.79	4.75769	5.63294	tts	B.1
peaks_nodup_uniq_B.1_infectedAll_fwd_peak_2686	LOC103225945	35.67	3.66689	6.26253	exon	B.1
peaks_nodup_uniq_B.1_infectedAll_fwd_peak_2692	EVA1B	22.79	2.97356	2.04217	exon	B.1
peaks_nodup_uniq_B.1_infectedAll_fwd_peak_2694	CLSPN	12.88	6.94021	5.61698	exon	B.1
peaks_nodup_uniq_B.1_infectedAll_fwd_peak_2696	C20H1orf216	7.93	4.46321	1.33247	intron	B.1
peaks_nodup_uniq_B.1_infectedAll_fwd_peak_2697	C20H1orf216	4.46	4.54884	1.86202	intron	B.1
peaks_nodup_uniq_B.1_infectedAll_fwd_peak_2698	LOC103225130	4.46	4.54884	1.86202	intron	B.1
peaks_nodup_uniq_B.1_infectedAll_fwd_peak_2699	LOC103225130	10.9	9.91569	9.92214	intron	B.1
peaks_nodup_uniq_B.1_infectedAll_fwd_peak_2700	LOC103225136	9.41	5.20631	2.89974	exon	B.1
peaks_nodup_uniq_B.1_infectedAll_fwd_peak_2703	SMIM12	15.36	4.08936	2.87436	exon	B.1
peaks_nodup_uniq_B.1_infectedAll_fwd_peak_2705a	RNF19B	16.84	5.57614	5.11553	exon	B.1
peaks_nodup_uniq_B.1_infectedAll_fwd_peak_2706	SYNC	4.95	4.96168	1.86202	exon	B.1
peaks_nodup_uniq_B.1_infectedAll_fwd_peak_2708	KHDRBS1	15.85	3.37057	1.6067	promoter-tss	B.1
peaks_nodup_uniq_B.1_infectedAll_fwd_peak_2710	PUM1	11.39	4.13141	2.04123	intron	B.1
peaks_nodup_uniq_B.1_infectedAll_fwd_peak_2713	TMEM200B	39.63	3.12555	5.27579	exon	B.1
peaks_nodup_uniq_B.1_infectedAll_fwd_peak_2716	PTAFR	7.93	6.37601	3.73502	intron	B.1
peaks_nodup_uniq_B.1_infectedAll_fwd_peak_2718	AHDC1	18.83	4.95631	4.79696	intron	B.1
peaks_nodup_uniq_B.1_infectedAll_fwd_peak_2722	LOC103225298	6.94	7.57081	7.86778	intergenic	B.1
peaks_nodup_uniq_B.1_infectedAll_fwd_peak_2723	FAM46B	20.81	6.05746	7.16225	exon	B.1
peaks_nodup_uniq_B.1_infectedAll_fwd_peak_2725	GPN2	13.38	8.16809	7.86778	exon	B.1
peaks_nodup_uniq_B.1_infectedAll_fwd_peak_2726	GPN2	10.9	6.61046	4.58597	tts	B.1
peaks_nodup_uniq_B.1_infectedAll_fwd_peak_2729	SEPN1	3.47	4.26242	2.67066	intron	B.1
peaks_nodup_uniq_B.1_infectedAll_fwd_peak_2731	IL22RA1	3.47	4.06164	1.68584	exon	B.1
peaks_nodup_uniq_B.1_infectedAll_fwd_peak_2732	ID3	10.4	4.07265	1.74956	exon	B.1
peaks_nodup_uniq_B.1_infectedAll_fwd_peak_2733	E2F2	3.47	4.21491	2.39042	exon	B.1
peaks_nodup_uniq_B.1_infectedAll_fwd_peak_2735	HTR1D	5.94	5.78734	3.02968	intergenic	B.1
peaks_nodup_uniq_B.1_infectedAll_fwd_peak_2738	LDLRAD2	11.89	4.29654	2.04123	intron	B.1
peaks_nodup_uniq_B.1_infectedAll_fwd_peak_2743	EIF4G3	4.46	4.33223	1.42254	intron	B.1
peaks_nodup_uniq_B.1_infectedAll_fwd_peak_2744	KIF17	3.47	4.21491	2.39042	intron	B.1
peaks_nodup_uniq_B.1_infectedAll_fwd_peak_2747	MUL1	17.34	4.82606	4.5127	exon	B.1
peaks_nodup_uniq_B.1_infectedAll_fwd_peak_2748	CAMK2N1	25.27	3.75221	4.48438	exon	B.1
peaks_nodup_uniq_B.1_infectedAll_fwd_peak_2753	UBR4	22.79	4.75769	5.63294	exon	B.1
peaks_nodup_uniq_B.1_infectedAll_fwd_peak_2755	UBR4	9.41	5.20631	2.89974	exon	B.1
peaks_nodup_uniq_B.1_infectedAll_fwd_peak_2756	ALDH4A1	15.36	3.89463	2.617	exon	B.1
peaks_nodup_uniq_B.1_infectedAll_fwd_peak_2759	LOC103225498	10.9	5.94941	3.76479	exon	B.1
peaks_nodup_uniq_B.1_infectedAll_fwd_peak_2763	C20H1orf64	5.94	5.42564	2.38787	intergenic	B.1
peaks_nodup_uniq_B.1_infectedAll_fwd_peak_2765	SPEN	4.46	4.87376	2.71768	exon	B.1
peaks_nodup_uniq_B.1_infectedAll_fwd_peak_2766	KAZN	5.94	6.62556	6.06467	intron	B.1
peaks_nodup_uniq_B.1_infectedAll_fwd_peak_2772	CASZ1	5.45	5.37451	3.02968	intron	B.1
peaks_nodup_uniq_B.1_infectedAll_fwd_peak_2777a	LOC103225640	5.45	6.15293	6.06467	intergenic	B.1
peaks_nodup_uniq_B.1_infectedAll_fwd_peak_2777b	LOC103225640	10.9	11.3518	15.785	intergenic	B.1
peaks_nodup_uniq_B.1_infectedAll_fwd_peak_2777c	LOC103225640	8.42	8.98869	11.6928	intergenic	B.1
peaks_nodup_uniq_B.1_infectedAll_fwd_peak_2779	SLC45A1	13.38	3.59396	1.7246	exon	B.1
peaks_nodup_uniq_B.1_infectedAll_fwd_peak_2781	SLC45A1	20.31	4.26229	4.34785	exon	B.1
peaks_nodup_uniq_B.1_infectedAll_fwd_peak_2782a	LOC103225658	6.44	7.09818	7.86778	intron	B.1
peaks_nodup_uniq_B.1_infectedAll_fwd_peak_2782b	LOC103225658	6.44	6.20018	4.32004	intron	B.1
peaks_nodup_uniq_B.1_infectedAll_fwd_peak_2784b	ERRFI1	7.43	4.21551	1.33247	intergenic	B.1
peaks_nodup_uniq_B.1_infectedAll_fwd_peak_2785	PER3	3.47	4.26242	2.67066	promoter-tss	B.1
peaks_nodup_uniq_B.1_infectedAll_fwd_peak_2792	ICMT	21.8	3.79961	3.56463	exon	B.1
peaks_nodup_uniq_B.1_infectedAll_fwd_peak_2793	CHD5	23.78	4.95585	6.26253	intron	B.1
peaks_nodup_uniq_B.1_infectedAll_fwd_peak_2794	CHD5	7.93	4.46321	1.33247	intron	B.1
peaks_nodup_uniq_B.1_infectedAll_fwd_peak_2796	KCNAB2	5.45	5.65738	3.79536	exon	B.1
peaks_nodup_uniq_B.1_infectedAll_fwd_peak_2798	C20H1orf174	3.47	4.26242	2.67066	intergenic	B.1
peaks_nodup_uniq_B.1_infectedAll_fwd_peak_2800	LOC103225723	4.95	5.61699	3.94577	intron	B.1
peaks_nodup_uniq_B.1_infectedAll_fwd_peak_2806	GNB1	10.9	5.94941	3.76479	intron	B.1
peaks_nodup_uniq_B.1_infectedAll_fwd_peak_2807	SLC35E2B	18.33	4.83246	4.79696	exon	B.1
peaks_nodup_uniq_B.1_infectedAll_fwd_peak_2808	LOC103225781	8.42	5.23434	2.72856	exon	B.1
peaks_nodup_uniq_B.1_infectedAll_fwd_peak_2810	ATAD3A	5.45	4.60672	1.66867	promoter-tss	B.1
peaks_nodup_uniq_B.1_infectedAll_fwd_peak_2811	ATAD3A	5.45	5.37451	3.02968	promoter-tss	B.1
peaks_nodup_uniq_B.1_infectedAll_fwd_peak_2812	ANKRD65	7.43	7.8065	8.28607	exon	B.1
peaks_nodup_uniq_B.1_infectedAll_fwd_peak_2819	COBL	3.96	4.59556	1.99324	promoter-tss	B.1
peaks_nodup_uniq_B.1_infectedAll_fwd_peak_2820	LOC103226069	7.93	4.46321	1.33247	exon	B.1
peaks_nodup_uniq_B.1_infectedAll_fwd_peak_2821	LOC103226073	10.9	3.96627	1.40639	intron	B.1
peaks_nodup_uniq_B.1_infectedAll_fwd_peak_2823	DDC	13.38	3.59396	1.7246	exon	B.1
peaks_nodup_uniq_B.1_infectedAll_fwd_peak_2824	FIGNL1	10.4	5.70171	3.76479	exon	B.1
peaks_nodup_uniq_B.1_infectedAll_fwd_peak_2831a	LOC103226105	16.35	4.33706	3.49873	exon	B.1
peaks_nodup_uniq_B.1_infectedAll_fwd_peak_2831b	LOC103226105	17.83	4.48439	3.78865	exon	B.1
peaks_nodup_uniq_B.1_infectedAll_fwd_peak_2831c	LOC103226105	13.38	4.22819	2.655	exon	B.1
peaks_nodup_uniq_B.1_infectedAll_fwd_peak_2836	MRPS24	32.7	2.59204	2.44822	exon	B.1
peaks_nodup_uniq_B.1_infectedAll_fwd_peak_2840	LOC103226165	6.44	4.65013	1.73039	exon	B.1
peaks_nodup_uniq_B.1_infectedAll_fwd_peak_2841b	LOC103226165	10.4	4.75143	2.62196	exon	B.1
peaks_nodup_uniq_B.1_infectedAll_fwd_peak_2842a	LOC103226171	23.28	3.19524	2.84083	promoter-tss	B.1
peaks_nodup_uniq_B.1_infectedAll_fwd_peak_2842b	LOC103226171	27.25	3.62142	4.60775	promoter-tss	B.1
peaks_nodup_uniq_B.1_infectedAll_fwd_peak_2843	LOC103226171	24.27	3.08227	2.73044	exon	B.1
peaks_nodup_uniq_B.1_infectedAll_fwd_peak_2846	KIAA0895	5.45	5.37451	3.02968	intron	B.1
peaks_nodup_uniq_B.1_infectedAll_fwd_peak_2849	DPY19L1	4.95	5.22282	2.49156	intron	B.1
peaks_nodup_uniq_B.1_infectedAll_fwd_peak_2850	RP9	19.82	4.16321	3.76479	exon	B.1
peaks_nodup_uniq_B.1_infectedAll_fwd_peak_2854	KBTBD2	21.3	2.78778	1.63486	exon	B.1
peaks_nodup_uniq_B.1_infectedAll_fwd_peak_2855	KBTBD2	23.28	6.07096	8.43224	exon	B.1
peaks_nodup_uniq_B.1_infectedAll_fwd_peak_2856	PPP1R17	21.8	2.84971	1.63486	intron	B.1
peaks_nodup_uniq_B.1_infectedAll_fwd_peak_2857	LOC103226270	3.47	4.26242	2.67066	intergenic	B.1
peaks_nodup_uniq_B.1_infectedAll_fwd_peak_2858	LOC103226308	3.47	4.21491	2.39042	exon	B.1
peaks_nodup_uniq_B.1_infectedAll_fwd_peak_2859b	HOXA7	18.83	4.7203	4.4198	exon	B.1
peaks_nodup_uniq_B.1_infectedAll_fwd_peak_2864	DFNA5	10.9	6.32916	4.25226	intron	B.1
peaks_nodup_uniq_B.1_infectedAll_fwd_peak_2869	LOC103226387	9.91	6.99232	4.82841	exon	B.1
peaks_nodup_uniq_B.1_infectedAll_fwd_peak_2870	LOC103226387	15.85	3.37057	1.6067	tts	B.1
peaks_nodup_uniq_B.1_infectedAll_fwd_peak_2871	LOC103226391	4.95	4.96168	1.86202	promoter-tss	B.1
peaks_nodup_uniq_B.1_infectedAll_fwd_peak_2872	TWISTNB	25.76	2.97343	2.53618	exon	B.1
peaks_nodup_uniq_B.1_infectedAll_fwd_peak_2874a	SNX13	6.94	6.1997	3.51142	exon	B.1
peaks_nodup_uniq_B.1_infectedAll_fwd_peak_2874b	SNX13	5.94	4.96058	1.66867	exon	B.1
peaks_nodup_uniq_B.1_infectedAll_fwd_peak_2876	LOC103227377	4.95	5.22282	2.49156	promoter-tss	B.1
peaks_nodup_uniq_B.1_infectedAll_fwd_peak_2879	PON1	5.94	6.62556	6.06467	intron	B.1
peaks_nodup_uniq_B.1_infectedAll_fwd_peak_2883	CDK6	17.34	3.66781	2.66879	intron	B.1
peaks_nodup_uniq_B.1_infectedAll_fwd_peak_2886	ABCB1	12.88	4.62681	2.67743	intron	B.1
peaks_nodup_uniq_B.1_infectedAll_fwd_peak_2887	ABCB1	10.9	5.40856	3.09866	intron	B.1
peaks_nodup_uniq_B.1_infectedAll_fwd_peak_2889	ABCB1	6.94	4.89853	1.66867	intron	B.1
peaks_nodup_uniq_B.1_infectedAll_fwd_peak_2892	LOC103226604	12.88	4.62681	2.67743	intron	B.1
peaks_nodup_uniq_B.1_infectedAll_fwd_peak_2895	LOC103226631	6.94	6.61301	4.32004	exon	B.1
peaks_nodup_uniq_B.1_infectedAll_fwd_peak_2897	SEMA3C	7.93	4.46321	1.33247	intron	B.1
peaks_nodup_uniq_B.1_infectedAll_fwd_peak_2900a	KMT2E	38.15	2.17477	1.72627	exon	B.1
peaks_nodup_uniq_B.1_infectedAll_fwd_peak_2901	HBP1	5.45	5.37451	3.02968	promoter-tss	B.1
peaks_nodup_uniq_B.1_infectedAll_fwd_peak_2903	BCAP29	6.94	6.61301	4.32004	intron	B.1
peaks_nodup_uniq_B.1_infectedAll_fwd_peak_2905	CBLL1	13.87	3.71781	1.7246	exon	B.1
peaks_nodup_uniq_B.1_infectedAll_fwd_peak_2906	DLD	3.47	4.21491	2.39042	promoter-tss	B.1
peaks_nodup_uniq_B.1_infectedAll_fwd_peak_2908	THAP5	8.42	4.71091	2.09477	exon	B.1
peaks_nodup_uniq_B.1_infectedAll_fwd_peak_2909	LRRN3	10.4	7.12714	5.65582	intron	B.1
peaks_nodup_uniq_B.1_infectedAll_fwd_peak_2910	LOC103226752	24.27	2.80829	2.09477	intergenic	B.1
peaks_nodup_uniq_B.1_infectedAll_fwd_peak_2912	FOXP2	5.45	6.08435	5.62483	intron	B.1
peaks_nodup_uniq_B.1_infectedAll_fwd_peak_2914	FOXP2	12.88	6.30929	4.79696	exon	B.1
peaks_nodup_uniq_B.1_infectedAll_fwd_peak_2916	CAV2	19.32	4.06413	3.76479	intron	B.1
peaks_nodup_uniq_B.1_infectedAll_fwd_peak_2918	MET	4.95	4.65157	1.31053	intron	B.1
peaks_nodup_uniq_B.1_infectedAll_fwd_peak_2919a	CAPZA2	30.22	2.55897	2.20801	intergenic	B.1
peaks_nodup_uniq_B.1_infectedAll_fwd_peak_2920	CPED1	4.95	5.51297	3.44109	exon	B.1
peaks_nodup_uniq_B.1_infectedAll_fwd_peak_2922	CALU	14.37	6.98483	6.60201	exon	B.1
peaks_nodup_uniq_B.1_infectedAll_fwd_peak_2924	FLNC	12.39	4.46168	2.67743	exon	B.1
peaks_nodup_uniq_B.1_infectedAll_fwd_peak_2926b	FLNC	29.23	2.32528	1.39258	exon	B.1
peaks_nodup_uniq_B.1_infectedAll_fwd_peak_2932b	PODXL	11.39	6.19711	4.65099	intergenic	B.1
peaks_nodup_uniq_B.1_infectedAll_fwd_peak_2939	LOC103226933	8.42	4.71091	2.09477	intron	B.1
peaks_nodup_uniq_B.1_infectedAll_fwd_peak_2940	LOC103226937	26.26	5.45125	8.31697	exon	B.1
peaks_nodup_uniq_B.1_infectedAll_fwd_peak_2941	LOC103226937	14.37	5.12221	4.12138	exon	B.1
peaks_nodup_uniq_B.1_infectedAll_fwd_peak_2942	LOC103226937	12.39	6.69251	5.61698	intron	B.1
peaks_nodup_uniq_B.1_infectedAll_fwd_peak_2945	SVOPL	33.69	2.31248	1.65526	exon	B.1
peaks_nodup_uniq_B.1_infectedAll_fwd_peak_2946	UBN2	14.37	3.34057	1.5382	promoter-tss	B.1
peaks_nodup_uniq_B.1_infectedAll_fwd_peak_2952a	ARHGEF5	13.38	3.42282	1.47138	exon	B.1
peaks_nodup_uniq_B.1_infectedAll_fwd_peak_2952b	ARHGEF5	36.66	3.76597	6.77935	exon	B.1
peaks_nodup_uniq_B.1_infectedAll_fwd_peak_2952c	ARHGEF5	35.17	2.78258	3.58735	exon	B.1
peaks_nodup_uniq_B.1_infectedAll_fwd_peak_2955	LOC103227169	8.92	5.50957	2.72856	intron	B.1
peaks_nodup_uniq_B.1_infectedAll_fwd_peak_2956	CUL1	10.4	5.18337	3.09866	promoter-tss	B.1
peaks_nodup_uniq_B.1_infectedAll_fwd_peak_2959	LOC103227179	26.75	2.52288	1.50574	exon	B.1
peaks_nodup_uniq_B.1_infectedAll_fwd_peak_2961	ZNF425	4.46	5.20768	4.32004	exon	B.1
peaks_nodup_uniq_B.1_infectedAll_fwd_peak_2963	ZNF282	10.4	3.80114	1.40639	exon	B.1
peaks_nodup_uniq_B.1_infectedAll_fwd_peak_2965	ZNF212	4.95	4.88034	1.7109	exon	B.1
peaks_nodup_uniq_B.1_infectedAll_fwd_peak_2967	SSPO	3.96	4.73505	2.67066	intron	B.1
peaks_nodup_uniq_B.1_infectedAll_fwd_peak_2969	REPIN1	31.21	3.57892	5.33946	exon	B.1
peaks_nodup_uniq_B.1_infectedAll_fwd_peak_2973	AGAP3	9.91	5.45401	2.89974	intron	B.1
peaks_nodup_uniq_B.1_infectedAll_fwd_peak_2974	NUB1	3.96	4.73505	2.67066	intergenic	B.1
peaks_nodup_uniq_B.1_infectedAll_fwd_peak_2975	NUB1	18.33	3.86597	3.17047	intron	B.1
peaks_nodup_uniq_B.1_infectedAll_fwd_peak_2979	LOC103227276	4.46	5.20768	4.32004	intron	B.1
peaks_nodup_uniq_B.1_infectedAll_fwd_peak_2980	INSIG1	8.92	4.95861	2.09477	intergenic	B.1
peaks_nodup_uniq_B.1_infectedAll_fwd_peak_2982	LOC103227291	5.94	4.96058	1.66867	intergenic	B.1
peaks_nodup_uniq_B.1_infectedAll_fwd_peak_2983	LOC103227291	5.45	5.37451	3.02968	intergenic	B.1
peaks_nodup_uniq_B.1_infectedAll_fwd_peak_2984	LOC103227297	5.45	5.37451	3.02968	exon	B.1
peaks_nodup_uniq_B.1_infectedAll_fwd_peak_2985	NOM1	12.39	4.46168	2.67743	exon	B.1
peaks_nodup_uniq_B.1_infectedAll_fwd_peak_2986	NOM1	47.56	3.23723	7.11493	exon	B.1
peaks_nodup_uniq_B.1_infectedAll_fwd_peak_2987	UBE3C	5.45	4.60672	1.66867	intron	B.1
peaks_nodup_uniq_B.1_infectedAll_fwd_peak_2989a	DNAJB6	6.94	7.57081	7.86778	intergenic	B.1
peaks_nodup_uniq_B.1_infectedAll_fwd_peak_2989b	DNAJB6	7.43	8.04344	9.75911	intergenic	B.1
peaks_nodup_uniq_B.1_infectedAll_fwd_peak_2991a	LOC103227311	4.95	4.96168	1.86202	intron	B.1
peaks_nodup_uniq_B.1_infectedAll_fwd_peak_2993	VIPR2	7.43	5.26939	2.66879	intergenic	B.1
peaks_nodup_uniq_B.1_infectedAll_fwd_peak_2994	VIPR2	12.39	7.43613	6.57551	intergenic	B.1
peaks_nodup_uniq_B.1_infectedAll_fwd_peak_2997	LOC103228627	10.9	3.96627	1.40639	exon	B.1
peaks_nodup_uniq_B.1_infectedAll_fwd_peak_2998	TRAK1	7.43	4.21551	1.33247	tts	B.1
peaks_nodup_uniq_B.1_infectedAll_fwd_peak_2999	LOC103227452	10.9	8.49916	7.21504	intron	B.1
peaks_nodup_uniq_B.1_infectedAll_fwd_peak_3001	ZBTB47	13.38	7.18791	6.5495	exon	B.1
peaks_nodup_uniq_B.1_infectedAll_fwd_peak_3003	ZBTB47	11.39	6.19711	4.65099	exon	B.1
peaks_nodup_uniq_B.1_infectedAll_fwd_peak_3004	ZBTB47	10.9	3.96627	1.40639	exon	B.1
peaks_nodup_uniq_B.1_infectedAll_fwd_peak_3005	ZBTB47	7.43	4.21551	1.33247	exon	B.1
peaks_nodup_uniq_B.1_infectedAll_fwd_peak_3007a	SNRK	9.91	5.45401	2.89974	exon	B.1
peaks_nodup_uniq_B.1_infectedAll_fwd_peak_3007b	SNRK	9.91	5.45401	2.89974	exon	B.1
peaks_nodup_uniq_B.1_infectedAll_fwd_peak_3008	SNRK	15.36	3.7176	2.32146	exon	B.1
peaks_nodup_uniq_B.1_infectedAll_fwd_peak_3009	SNRK	17.34	4.58476	4.14794	exon	B.1
peaks_nodup_uniq_B.1_infectedAll_fwd_peak_3010	LOC103227481	8.92	7.40091	5.37116	intergenic	B.1
peaks_nodup_uniq_B.1_infectedAll_fwd_peak_3016	PTH1R	3.96	4.73505	2.67066	exon	B.1
peaks_nodup_uniq_B.1_infectedAll_fwd_peak_3017	KLHL18	4.46	4.96237	3.02968	promoter-tss	B.1
peaks_nodup_uniq_B.1_infectedAll_fwd_peak_3018	PTPN23	7.93	6.37601	3.73502	tts	B.1
peaks_nodup_uniq_B.1_infectedAll_fwd_peak_3020a	DHX30	16.84	4.05537	2.87436	exon	B.1
peaks_nodup_uniq_B.1_infectedAll_fwd_peak_3022	ARIH2	24.77	2.86334	2.09477	promoter-tss	B.1
peaks_nodup_uniq_B.1_infectedAll_fwd_peak_3023	ARIH2	3.47	3.98911	1.42553	intron	B.1
peaks_nodup_uniq_B.1_infectedAll_fwd_peak_3024	WDR6	7.93	5.79638	2.90073	promoter-tss	B.1
peaks_nodup_uniq_B.1_infectedAll_fwd_peak_3026	LOC103227634	17.34	3.1619	1.74956	exon	B.1
peaks_nodup_uniq_B.1_infectedAll_fwd_peak_3029	APEH	5.94	4.96058	1.66867	exon	B.1
peaks_nodup_uniq_B.1_infectedAll_fwd_peak_3030b	RBM6	20.81	3.11526	2.0272	exon	B.1
peaks_nodup_uniq_B.1_infectedAll_fwd_peak_3034a	LSMEM2	15.85	7.66038	7.5639	exon	B.1
peaks_nodup_uniq_B.1_infectedAll_fwd_peak_3034b	LSMEM2	13.38	4.79194	3.38877	exon	B.1
peaks_nodup_uniq_B.1_infectedAll_fwd_peak_3035b	RBM15B	29.23	3.02287	3.41004	exon	B.1
peaks_nodup_uniq_B.1_infectedAll_fwd_peak_3036	RAD54L2	15.85	4.21321	2.87436	tts	B.1
peaks_nodup_uniq_B.1_infectedAll_fwd_peak_3038	PHF7	3.47	4.06164	1.68584	intron	B.1
peaks_nodup_uniq_B.1_infectedAll_fwd_peak_3039	STAB1	13.87	7.43562	6.5495	exon	B.1
peaks_nodup_uniq_B.1_infectedAll_fwd_peak_3040	CCDC66	11.39	4.13141	2.04123	exon	B.1
peaks_nodup_uniq_B.1_infectedAll_fwd_peak_3041	CCDC66	23.78	11.2633	16.0541	intron	B.1
peaks_nodup_uniq_B.1_infectedAll_fwd_peak_3042	CCDC66	12.88	6.94021	5.61698	exon	B.1
peaks_nodup_uniq_B.1_infectedAll_fwd_peak_3043	CCDC66	12.39	6.69251	5.61698	tts	B.1
peaks_nodup_uniq_B.1_infectedAll_fwd_peak_3046	SLMAP	16.84	4.46091	3.49873	exon	B.1
peaks_nodup_uniq_B.1_infectedAll_fwd_peak_3047	FLNB	6.44	6.00017	3.88483	exon	B.1
peaks_nodup_uniq_B.1_infectedAll_fwd_peak_3051	LOC103227825	23.78	4.95585	6.26253	exon	B.1
peaks_nodup_uniq_B.1_infectedAll_fwd_peak_3053	LOC103227842	3.96	4.73505	2.67066	exon	B.1
peaks_nodup_uniq_B.1_infectedAll_fwd_peak_3054	ADAMTS9	3.47	4.06164	1.68584	intergenic	B.1
peaks_nodup_uniq_B.1_infectedAll_fwd_peak_3055	ADAMTS9	3.96	4.51201	1.68584	intergenic	B.1
peaks_nodup_uniq_B.1_infectedAll_fwd_peak_3058	TMA7	28.73	3.3037	3.85366	exon	B.1
peaks_nodup_uniq_B.1_infectedAll_fwd_peak_3059	EBLN2	30.71	3.52387	4.81256	exon	B.1
peaks_nodup_uniq_B.1_infectedAll_fwd_peak_3060a	EBLN2	23.28	2.8237	1.9969	exon	B.1
peaks_nodup_uniq_B.1_infectedAll_fwd_peak_3063	EDEM1	8.42	4.71091	2.09477	exon	B.1
peaks_nodup_uniq_B.1_infectedAll_fwd_peak_3067	SETD5	12.88	3.96584	1.86171	exon	B.1
peaks_nodup_uniq_B.1_infectedAll_fwd_peak_3068b	SETD5	22.79	2.90103	1.88128	exon	B.1
peaks_nodup_uniq_B.1_infectedAll_fwd_peak_3069	LOC103227969	6.44	5.31444	2.67066	intergenic	B.1
peaks_nodup_uniq_B.1_infectedAll_fwd_peak_3070	BRPF1	29.72	2.56034	1.9766	intron	B.1
peaks_nodup_uniq_B.1_infectedAll_fwd_peak_3072	OGG1	10.4	4.38593	2.13121	exon	B.1
peaks_nodup_uniq_B.1_infectedAll_fwd_peak_3075	TATDN2	15.85	5.61761	4.83639	exon	B.1
peaks_nodup_uniq_B.1_infectedAll_fwd_peak_3077	SEC13	5.94	6.62556	6.06467	intron	B.1
peaks_nodup_uniq_B.1_infectedAll_fwd_peak_3082	TSEN2	4.95	5.6803	4.32004	intergenic	B.1
peaks_nodup_uniq_B.1_infectedAll_fwd_peak_3086	TMEM43	23.78	6.19481	8.43224	tts	B.1
peaks_nodup_uniq_B.1_infectedAll_fwd_peak_3089	MRPS25	9.41	7.65634	6.39	intron	B.1
peaks_nodup_uniq_B.1_infectedAll_fwd_peak_3090	TMCC1	7.43	5.26939	2.66879	exon	B.1
peaks_nodup_uniq_B.1_infectedAll_fwd_peak_3094	MBD4	5.94	4.96058	1.66867	exon	B.1
peaks_nodup_uniq_B.1_infectedAll_fwd_peak_3095	LOC103228076	20.31	2.87993	1.68584	exon	B.1
peaks_nodup_uniq_B.1_infectedAll_fwd_peak_3099	MGLL	4.46	4.62594	2.04217	intron	B.1
peaks_nodup_uniq_B.1_infectedAll_fwd_peak_3100	ABTB1	7.43	5.26939	2.66879	intergenic	B.1
peaks_nodup_uniq_B.1_infectedAll_fwd_peak_3104	CHST13	3.47	4.26242	2.67066	intron	B.1
peaks_nodup_uniq_B.1_infectedAll_fwd_peak_3105	ZXDC	9.41	6.50789	4.60775	exon	B.1
peaks_nodup_uniq_B.1_infectedAll_fwd_peak_3109	SNX4	12.88	4.62681	2.67743	exon	B.1
peaks_nodup_uniq_B.1_infectedAll_fwd_peak_3110b	SLC12A8	7.93	4.46321	1.33247	exon	B.1
peaks_nodup_uniq_B.1_infectedAll_fwd_peak_3111	MUC13	12.39	6.0841	4.79696	exon	B.1
peaks_nodup_uniq_B.1_infectedAll_fwd_peak_3114	CCDC14	19.32	8.46693	10.5325	exon	B.1
peaks_nodup_uniq_B.1_infectedAll_fwd_peak_3120	MYLK	18.83	3.96505	3.17047	exon	B.1
peaks_nodup_uniq_B.1_infectedAll_fwd_peak_3121	HSPBAP1	10.9	3.96627	1.40639	exon	B.1
peaks_nodup_uniq_B.1_infectedAll_fwd_peak_3124	KPNA1	4.46	4.54884	1.86202	intron	B.1
peaks_nodup_uniq_B.1_infectedAll_fwd_peak_3126	LOC103228185	5.45	4.60672	1.66867	exon	B.1
peaks_nodup_uniq_B.1_infectedAll_fwd_peak_3131	GOLGB1	40.62	3.46857	6.65597	exon	B.1
peaks_nodup_uniq_B.1_infectedAll_fwd_peak_3132	GOLGB1	23.28	3.79435	4.15263	exon	B.1
peaks_nodup_uniq_B.1_infectedAll_fwd_peak_3134a	GOLGB1	18.83	4.58918	4.24062	exon	B.1
peaks_nodup_uniq_B.1_infectedAll_fwd_peak_3134b	GOLGB1	19.32	4.23347	4.08114	exon	B.1
peaks_nodup_uniq_B.1_infectedAll_fwd_peak_3135	HCLS1	8.42	6.4533	4.3937	exon	B.1
peaks_nodup_uniq_B.1_infectedAll_fwd_peak_3139a	GSK3B	29.23	2.74806	2.66879	exon	B.1
peaks_nodup_uniq_B.1_infectedAll_fwd_peak_3145b	TIGIT	20.81	3.51723	2.79765	exon	B.1
peaks_nodup_uniq_B.1_infectedAll_fwd_peak_3154b	ZBTB11	21.8	2.84971	1.63486	exon	B.1
peaks_nodup_uniq_B.1_infectedAll_fwd_peak_3159	COL8A1	12.39	9.56073	9.75911	promoter-tss	B.1
peaks_nodup_uniq_B.1_infectedAll_fwd_peak_3162	DCBLD2	5.45	4.60672	1.66867	intron	B.1
peaks_nodup_uniq_B.1_infectedAll_fwd_peak_3167	CGGBP1	23.78	4.12988	4.65919	exon	B.1
peaks_nodup_uniq_B.1_infectedAll_fwd_peak_3176	LOC103244286	7.43	7.02585	5.65582	exon	B.1
peaks_nodup_uniq_B.1_infectedAll_fwd_peak_3179	SLC25A46	8.42	4.71091	2.09477	exon	B.1
peaks_nodup_uniq_B.1_infectedAll_fwd_peak_3183	LOC103244337	4.46	4.87376	2.71768	intron	B.1
peaks_nodup_uniq_B.1_infectedAll_fwd_peak_3184	SRP19	18.33	4.83246	4.79696	exon	B.1
peaks_nodup_uniq_B.1_infectedAll_fwd_peak_3187a	SRP19	8.92	4.81418	1.94979	exon	B.1
peaks_nodup_uniq_B.1_infectedAll_fwd_peak_3188	SRP19	15.36	5.45248	4.83639	exon	B.1
peaks_nodup_uniq_B.1_infectedAll_fwd_peak_3189	LOC103245147	37.65	9.66262	20.7311	tts	B.1
peaks_nodup_uniq_B.1_infectedAll_fwd_peak_3190	LOC103245147	14.86	3.96551	2.30038	exon	B.1
peaks_nodup_uniq_B.1_infectedAll_fwd_peak_3191	DCP2	11.89	5.85892	3.94577	intron	B.1
peaks_nodup_uniq_B.1_infectedAll_fwd_peak_3193	AP3S1	5.94	5.26122	2.09477	intron	B.1
peaks_nodup_uniq_B.1_infectedAll_fwd_peak_3194	AP3S1	4.46	4.47427	1.7109	intron	B.1
peaks_nodup_uniq_B.1_infectedAll_fwd_peak_3195	LOC103244371	9.41	6.50789	4.60775	intergenic	B.1
peaks_nodup_uniq_B.1_infectedAll_fwd_peak_3201	LOC103245148	9.41	8.00971	7.03534	intron	B.1
peaks_nodup_uniq_B.1_infectedAll_fwd_peak_3202	LOC103244391	7.93	4.46321	1.33247	exon	B.1
peaks_nodup_uniq_B.1_infectedAll_fwd_peak_3205	LOC103244408	30.71	3.17149	3.85504	exon	B.1
peaks_nodup_uniq_B.1_infectedAll_fwd_peak_3206	SNX24	3.47	4.13686	1.99324	intron	B.1
peaks_nodup_uniq_B.1_infectedAll_fwd_peak_3207	CSNK1G3	29.72	8.08528	14.1169	promoter-tss	B.1
peaks_nodup_uniq_B.1_infectedAll_fwd_peak_3210	PHAX	26.75	3.46896	3.8865	exon	B.1
peaks_nodup_uniq_B.1_infectedAll_fwd_peak_3211	PHAX	7.93	6.03136	3.22056	intron	B.1
peaks_nodup_uniq_B.1_infectedAll_fwd_peak_3212	LOC103244449	15.36	8.17872	8.51948	exon	B.1
peaks_nodup_uniq_B.1_infectedAll_fwd_peak_3213	PRRC1	7.93	7.83019	6.66584	exon	B.1
peaks_nodup_uniq_B.1_infectedAll_fwd_peak_3215	PDLIM4	14.86	5.28734	4.12138	intron	B.1
peaks_nodup_uniq_B.1_infectedAll_fwd_peak_3216	RAD50	20.81	10.9034	14.0617	intron	B.1
peaks_nodup_uniq_B.1_infectedAll_fwd_peak_3217	LOC103244510	12.88	8.67527	7.86778	intron	B.1
peaks_nodup_uniq_B.1_infectedAll_fwd_peak_3219	LOC103244533	15.36	8.17872	8.51948	intergenic	B.1
peaks_nodup_uniq_B.1_infectedAll_fwd_peak_3220	JADE2	5.94	5.69247	2.8613	intron	B.1
peaks_nodup_uniq_B.1_infectedAll_fwd_peak_3221	JADE2	5.45	4.60672	1.66867	exon	B.1
peaks_nodup_uniq_B.1_infectedAll_fwd_peak_3222	SAR1B	11.89	4.29654	2.04123	exon	B.1
peaks_nodup_uniq_B.1_infectedAll_fwd_peak_3223	LOC103244556	29.72	3.07241	3.41004	exon	B.1
peaks_nodup_uniq_B.1_infectedAll_fwd_peak_3224	DDX46	36.66	3.76597	6.77935	intron	B.1
peaks_nodup_uniq_B.1_infectedAll_fwd_peak_3225	C23H5orf24	16.35	3.46965	2.09477	exon	B.1
peaks_nodup_uniq_B.1_infectedAll_fwd_peak_3229	SMAD5	3.47	3.98911	1.42553	exon	B.1
peaks_nodup_uniq_B.1_infectedAll_fwd_peak_3230	KDM3B	6.44	4.76937	1.88912	exon	B.1
peaks_nodup_uniq_B.1_infectedAll_fwd_peak_3231	KDM3B	7.93	4.46321	1.33247	exon	B.1
peaks_nodup_uniq_B.1_infectedAll_fwd_peak_3233	REEP2	5.94	4.96058	1.66867	exon	B.1
peaks_nodup_uniq_B.1_infectedAll_fwd_peak_3238	DNAJC18	6.44	6.64305	5.61698	intron	B.1
peaks_nodup_uniq_B.1_infectedAll_fwd_peak_3239	CXXC5	28.73	2.97333	2.96743	exon	B.1
peaks_nodup_uniq_B.1_infectedAll_fwd_peak_3244	HBEGF	3.47	4.26242	2.67066	exon	B.1
peaks_nodup_uniq_B.1_infectedAll_fwd_peak_3246	LOC103244656	24.77	3.68144	3.9611	promoter-tss	B.1
peaks_nodup_uniq_B.1_infectedAll_fwd_peak_3247	SRA1	33.69	3.46873	5.27579	exon	B.1
peaks_nodup_uniq_B.1_infectedAll_fwd_peak_3251	IK	30.71	3.96436	5.98685	intron	B.1
peaks_nodup_uniq_B.1_infectedAll_fwd_peak_3252	DND1	19.32	3.38677	2.54555	exon	B.1
peaks_nodup_uniq_B.1_infectedAll_fwd_peak_3255	ARHGAP26	6.44	5.63653	3.17047	intron	B.1
peaks_nodup_uniq_B.1_infectedAll_fwd_peak_3258	LOC103244717	10.4	3.80114	1.40639	intron	B.1
peaks_nodup_uniq_B.1_infectedAll_fwd_peak_3260	LOC103244717	10.9	3.96627	1.40639	exon	B.1
peaks_nodup_uniq_B.1_infectedAll_fwd_peak_3263	POU4F3	17.83	6.27815	6.44689	exon	B.1
peaks_nodup_uniq_B.1_infectedAll_fwd_peak_3264	GPR151	14.37	4.5196	3.26229	tts	B.1
peaks_nodup_uniq_B.1_infectedAll_fwd_peak_3265	PPP2R2B	5.94	6.31347	4.50522	intron	B.1
peaks_nodup_uniq_B.1_infectedAll_fwd_peak_3269	PPARGC1B	14.37	3.84166	2.30038	exon	B.1
peaks_nodup_uniq_B.1_infectedAll_fwd_peak_3270	CSF1R	20.81	5.45171	6.19675	exon	B.1
peaks_nodup_uniq_B.1_infectedAll_fwd_peak_3272	SYNPO	6.44	6.64305	5.61698	intron	B.1
peaks_nodup_uniq_B.1_infectedAll_fwd_peak_3275	SYNPO	18.33	3.11772	1.85082	exon	B.1
peaks_nodup_uniq_B.1_infectedAll_fwd_peak_3276	SYNPO	15.36	3.7176	2.32146	exon	B.1
peaks_nodup_uniq_B.1_infectedAll_fwd_peak_3278a	FAT2	7.43	5.26939	2.66879	intergenic	B.1
peaks_nodup_uniq_B.1_infectedAll_fwd_peak_3278b	FAT2	10.4	5.70171	3.76479	intergenic	B.1
peaks_nodup_uniq_B.1_infectedAll_fwd_peak_3279	G3BP1	21.3	2.78778	1.63486	exon	B.1
peaks_nodup_uniq_B.1_infectedAll_fwd_peak_3281	SAP30L	7.43	5.26939	2.66879	exon	B.1
peaks_nodup_uniq_B.1_infectedAll_fwd_peak_3282a	LARP1	15.36	4.54373	3.56463	promoter-tss	B.1
peaks_nodup_uniq_B.1_infectedAll_fwd_peak_3282b	LARP1	19.32	4.41753	4.36363	promoter-tss	B.1
peaks_nodup_uniq_B.1_infectedAll_fwd_peak_3288	HAVCR1	14.37	3.84166	2.30038	exon	B.1
peaks_nodup_uniq_B.1_infectedAll_fwd_peak_3289	CYFIP2	7.43	5.62068	3.09866	intron	B.1
peaks_nodup_uniq_B.1_infectedAll_fwd_peak_3293	TTC1	9.91	5.45401	2.89974	intron	B.1
peaks_nodup_uniq_B.1_infectedAll_fwd_peak_3298	WWC1	4.95	5.04577	2.04217	intron	B.1
peaks_nodup_uniq_B.1_infectedAll_fwd_peak_3300	RARS	12.39	4.46168	2.67743	exon	B.1
peaks_nodup_uniq_B.1_infectedAll_fwd_peak_3301	RARS	11.39	4.13141	2.04123	exon	B.1
peaks_nodup_uniq_B.1_infectedAll_fwd_peak_3302	SPDL1	4.46	4.7057	2.25057	exon	B.1
peaks_nodup_uniq_B.1_infectedAll_fwd_peak_3303	RANBP17	6.94	5.6683	2.67066	intron	B.1
peaks_nodup_uniq_B.1_infectedAll_fwd_peak_3304	RANBP17	4.46	4.96237	3.02968	intron	B.1
peaks_nodup_uniq_B.1_infectedAll_fwd_peak_3305	FGF18	9.41	5.20631	2.89974	exon	B.1
peaks_nodup_uniq_B.1_infectedAll_fwd_peak_3307	LOC103244985	10.9	3.96627	1.40639	intron	B.1
peaks_nodup_uniq_B.1_infectedAll_fwd_peak_3309	LOC103244985	31.71	2.72547	2.69317	exon	B.1
peaks_nodup_uniq_B.1_infectedAll_fwd_peak_3312	SIMC1	7.93	4.46321	1.33247	intron	B.1
peaks_nodup_uniq_B.1_infectedAll_fwd_peak_3314a	RNF44	15.36	3.27149	1.6067	exon	B.1
peaks_nodup_uniq_B.1_infectedAll_fwd_peak_3315	RNF44	21.3	2.78778	1.63486	exon	B.1
peaks_nodup_uniq_B.1_infectedAll_fwd_peak_3316a	CDHR2	39.63	3.90693	7.88404	intron	B.1
peaks_nodup_uniq_B.1_infectedAll_fwd_peak_3316b	CDHR2	45.58	2.11713	1.99072	intron	B.1
peaks_nodup_uniq_B.1_infectedAll_fwd_peak_3317	GPRIN1	12.88	5.21821	3.44776	intron	B.1
peaks_nodup_uniq_B.1_infectedAll_fwd_peak_3318	TSPAN17	8.92	6.88696	4.54709	intron	B.1
peaks_nodup_uniq_B.1_infectedAll_fwd_peak_3319	UNC5A	4.95	4.96168	1.86202	intron	B.1
peaks_nodup_uniq_B.1_infectedAll_fwd_peak_3323	LOC103245153	15.36	8.17872	8.51948	exon	B.1
peaks_nodup_uniq_B.1_infectedAll_fwd_peak_3327	PDLIM7	8.92	7.08373	4.82758	promoter-tss	B.1
peaks_nodup_uniq_B.1_infectedAll_fwd_peak_3332	RUFY1	7.93	4.46321	1.33247	exon	B.1
peaks_nodup_uniq_B.1_infectedAll_fwd_peak_3334	LOC103245106	11.89	8.05602	6.74379	exon	B.1
peaks_nodup_uniq_B.1_infectedAll_fwd_peak_3335	MAML1	13.87	5.31115	3.85052	exon	B.1
peaks_nodup_uniq_B.1_infectedAll_fwd_peak_3336	C23H5orf45	19.32	5.08016	5.52473	intron	B.1
peaks_nodup_uniq_B.1_infectedAll_fwd_peak_3339	TBC1D9B	5.45	5.7584	4.13483	intron	B.1
peaks_nodup_uniq_B.1_infectedAll_fwd_peak_3342	TRIM41	30.22	10.4065	18.6112	exon	B.1
peaks_nodup_uniq_B.1_infectedAll_fwd_peak_3343	KHNYN	15.85	5.61761	4.83639	exon	B.1
peaks_nodup_uniq_B.1_infectedAll_fwd_peak_3346a	ARHGAP5	24.77	6.44251	9.20875	exon	B.1
peaks_nodup_uniq_B.1_infectedAll_fwd_peak_3347	ARHGAP5	24.77	4.15646	4.96078	exon	B.1
peaks_nodup_uniq_B.1_infectedAll_fwd_peak_3353	EAPP	29.23	4.31838	6.75051	intergenic	B.1
peaks_nodup_uniq_B.1_infectedAll_fwd_peak_3354	EAPP	27.74	3.59281	4.36363	intergenic	B.1
peaks_nodup_uniq_B.1_infectedAll_fwd_peak_3355	BAZ1A	5.94	4.96058	1.66867	intron	B.1
peaks_nodup_uniq_B.1_infectedAll_fwd_peak_3357	FAM177A1	13.38	4.79194	3.38877	intron	B.1
peaks_nodup_uniq_B.1_infectedAll_fwd_peak_3358	KIAA0391	9.41	5.20631	2.89974	intron	B.1
peaks_nodup_uniq_B.1_infectedAll_fwd_peak_3359	LOC103228815	3.47	4.21491	2.39042	intron	B.1
peaks_nodup_uniq_B.1_infectedAll_fwd_peak_3360	LOC103229890	3.96	4.73505	2.67066	intron	B.1
peaks_nodup_uniq_B.1_infectedAll_fwd_peak_3362	PNN	40.62	2.08114	1.41726	exon	B.1
peaks_nodup_uniq_B.1_infectedAll_fwd_peak_3369	MGAT2	13.87	4.95708	3.38877	promoter-tss	B.1
peaks_nodup_uniq_B.1_infectedAll_fwd_peak_3373	LOC103228982	15.36	3.55596	2.05443	intron	B.1
peaks_nodup_uniq_B.1_infectedAll_fwd_peak_3374	LOC103228982	17.34	3.52674	2.40562	exon	B.1
peaks_nodup_uniq_B.1_infectedAll_fwd_peak_3375	LOC103228982	26.75	2.77517	2.15611	exon	B.1
peaks_nodup_uniq_B.1_infectedAll_fwd_peak_3379	MAPK1IP1L	9.91	4.95819	2.35114	exon	B.1
peaks_nodup_uniq_B.1_infectedAll_fwd_peak_3380	MAPK1IP1L	13.87	4.1309	2.30326	exon	B.1
peaks_nodup_uniq_B.1_infectedAll_fwd_peak_3382	LOC103229032	18.83	3.96505	3.17047	exon	B.1
peaks_nodup_uniq_B.1_infectedAll_fwd_peak_3390	LOC103229084	27.25	4.03529	5.61975	exon	B.1
peaks_nodup_uniq_B.1_infectedAll_fwd_peak_3391	TOMM20L	17.34	3.66781	2.66879	exon	B.1
peaks_nodup_uniq_B.1_infectedAll_fwd_peak_3396	LOC103229097	26.26	4.54271	6.48169	intron	B.1
peaks_nodup_uniq_B.1_infectedAll_fwd_peak_3401	PPM1A	27.25	2.82471	2.59557	exon	B.1
peaks_nodup_uniq_B.1_infectedAll_fwd_peak_3402	LOC103229110	10.9	3.96627	1.40639	exon	B.1
peaks_nodup_uniq_B.1_infectedAll_fwd_peak_3405	LOC103229125	11.89	12.16	16.8901	exon	B.1
peaks_nodup_uniq_B.1_infectedAll_fwd_peak_3406	HIF1A	14.37	3.84166	2.30038	intron	B.1
peaks_nodup_uniq_B.1_infectedAll_fwd_peak_3407	LOC103229162	29.23	2.32528	1.39258	exon	B.1
peaks_nodup_uniq_B.1_infectedAll_fwd_peak_3408	LOC103229162	29.23	2.32528	1.39258	exon	B.1
peaks_nodup_uniq_B.1_infectedAll_fwd_peak_3409	LOC103229162	31.71	2.97324	3.45342	exon	B.1
peaks_nodup_uniq_B.1_infectedAll_fwd_peak_3412	ZBTB1	20.31	5.32786	6.19675	exon	B.1
peaks_nodup_uniq_B.1_infectedAll_fwd_peak_3414	LOC103229173	28.73	5.94665	9.75911	intron	B.1
peaks_nodup_uniq_B.1_infectedAll_fwd_peak_3416	LOC103229173	22.79	2.97356	2.04217	exon	B.1
peaks_nodup_uniq_B.1_infectedAll_fwd_peak_3419	LOC103229199	3.47	4.26242	2.67066	intergenic	B.1
peaks_nodup_uniq_B.1_infectedAll_fwd_peak_3421	GPHN	10.4	3.80114	1.40639	intron	B.1
peaks_nodup_uniq_B.1_infectedAll_fwd_peak_3423	LOC103229195	3.96	4.73505	2.67066	intron	B.1
peaks_nodup_uniq_B.1_infectedAll_fwd_peak_3426b	GALNT16	4.95	5.61699	3.94577	intron	B.1
peaks_nodup_uniq_B.1_infectedAll_fwd_peak_3427	PLEKHD1	3.47	4.21491	2.39042	intergenic	B.1
peaks_nodup_uniq_B.1_infectedAll_fwd_peak_3428	SRSF5	11.89	4.29654	2.04123	exon	B.1
peaks_nodup_uniq_B.1_infectedAll_fwd_peak_3431	TTC9	10.9	4.24958	1.74956	exon	B.1
peaks_nodup_uniq_B.1_infectedAll_fwd_peak_3432a	PCNX	33.19	5.18059	9.94075	exon	B.1
peaks_nodup_uniq_B.1_infectedAll_fwd_peak_3434	LOC103229904	9.41	4.73301	2.35114	exon	B.1
peaks_nodup_uniq_B.1_infectedAll_fwd_peak_3435	SIPA1L1	15.36	3.27149	1.6067	exon	B.1
peaks_nodup_uniq_B.1_infectedAll_fwd_peak_3437	LOC103229276	10.4	6.33523	4.58597	exon	B.1
peaks_nodup_uniq_B.1_infectedAll_fwd_peak_3439	LOC103229276	5.45	5.37451	3.02968	exon	B.1
peaks_nodup_uniq_B.1_infectedAll_fwd_peak_3441a	PNMA1	27.74	4.79041	7.10315	intron	B.1
peaks_nodup_uniq_B.1_infectedAll_fwd_peak_3442a	PNMA1	10.9	3.96627	1.40639	intron	B.1
peaks_nodup_uniq_B.1_infectedAll_fwd_peak_3442b	PNMA1	8.42	4.61854	2.00703	intron	B.1
peaks_nodup_uniq_B.1_infectedAll_fwd_peak_3443a	PNMA1	11.39	4.76701	2.8478	intron	B.1
peaks_nodup_uniq_B.1_infectedAll_fwd_peak_3444a	PNMA1	18.83	6.60841	7.25248	intron	B.1
peaks_nodup_uniq_B.1_infectedAll_fwd_peak_3444b	PNMA1	9.91	5.45401	2.89974	intron	B.1
peaks_nodup_uniq_B.1_infectedAll_fwd_peak_3444d	PNMA1	13.38	6.91146	6.1867	intron	B.1
peaks_nodup_uniq_B.1_infectedAll_fwd_peak_3445a	PNMA1	12.88	6.94021	5.61698	intron	B.1
peaks_nodup_uniq_B.1_infectedAll_fwd_peak_3445b	PNMA1	13.38	8.26197	7.9848	intron	B.1
peaks_nodup_uniq_B.1_infectedAll_fwd_peak_3448	CCDC176	3.47	4.21491	2.39042	intron	B.1
peaks_nodup_uniq_B.1_infectedAll_fwd_peak_3449	CCDC176	7.43	4.21551	1.33247	exon	B.1
peaks_nodup_uniq_B.1_infectedAll_fwd_peak_3450	VSX2	6.44	6.5265	5.21079	exon	B.1
peaks_nodup_uniq_B.1_infectedAll_fwd_peak_3451	FCF1	7.93	8.2652	8.28607	intron	B.1
peaks_nodup_uniq_B.1_infectedAll_fwd_peak_3452	YLPM1	26.26	2.72563	2.15611	exon	B.1
peaks_nodup_uniq_B.1_infectedAll_fwd_peak_3453	YLPM1	24.27	4.21244	5.26669	exon	B.1
peaks_nodup_uniq_B.1_infectedAll_fwd_peak_3455	PROX2	4.46	4.4021	1.57294	exon	B.1
peaks_nodup_uniq_B.1_infectedAll_fwd_peak_3456	EIF2B2	8.42	6.72987	4.82758	exon	B.1
peaks_nodup_uniq_B.1_infectedAll_fwd_peak_3459	LOC103229357	12.88	4.62681	2.67743	exon	B.1
peaks_nodup_uniq_B.1_infectedAll_fwd_peak_3462	LOC103229371	8.92	4.95861	2.09477	intergenic	B.1
peaks_nodup_uniq_B.1_infectedAll_fwd_peak_3464	VASH1	12.39	6.0841	4.79696	tts	B.1
peaks_nodup_uniq_B.1_infectedAll_fwd_peak_3467	SPATA7	3.96	4.73505	2.67066	intron	B.1
peaks_nodup_uniq_B.1_infectedAll_fwd_peak_3468	SPATA7	4.95	5.6803	4.32004	exon	B.1
peaks_nodup_uniq_B.1_infectedAll_fwd_peak_3472	LGMN	8.92	4.95861	2.09477	exon	B.1
peaks_nodup_uniq_B.1_infectedAll_fwd_peak_3473	GOLGA5	6.44	4.65013	1.73039	intron	B.1
peaks_nodup_uniq_B.1_infectedAll_fwd_peak_3474	LOC103229580	6.44	6.64305	5.61698	exon	B.1
peaks_nodup_uniq_B.1_infectedAll_fwd_peak_3478	DDX24	3.47	4.26242	2.67066	exon	B.1
peaks_nodup_uniq_B.1_infectedAll_fwd_peak_3481	CLMN	6.94	6.61301	4.32004	intron	B.1
peaks_nodup_uniq_B.1_infectedAll_fwd_peak_3482	BDKRB2	3.96	4.68227	2.39042	intron	B.1
peaks_nodup_uniq_B.1_infectedAll_fwd_peak_3484	LOC103229648	3.47	4.26242	2.67066	exon	B.1
peaks_nodup_uniq_B.1_infectedAll_fwd_peak_3487	LOC103229651	8.42	7.85152	7.04255	intergenic	B.1
peaks_nodup_uniq_B.1_infectedAll_fwd_peak_3488	LOC103229652	5.45	5.37451	3.02968	intergenic	B.1
peaks_nodup_uniq_B.1_infectedAll_fwd_peak_3489	LOC103229676	4.46	5.20768	4.32004	intergenic	B.1
peaks_nodup_uniq_B.1_infectedAll_fwd_peak_3490	YY1	29.72	7.68102	13.4322	promoter-tss	B.1
peaks_nodup_uniq_B.1_infectedAll_fwd_peak_3494	HSP90AA1	15.36	5.45248	4.83639	exon	B.1
peaks_nodup_uniq_B.1_infectedAll_fwd_peak_3496	WDR20	13.87	4.95708	3.38877	exon	B.1
peaks_nodup_uniq_B.1_infectedAll_fwd_peak_3497a	LOC103229739	12.88	4.62681	2.67743	tts	B.1
peaks_nodup_uniq_B.1_infectedAll_fwd_peak_3497b	LOC103229739	11.89	4.60344	2.43186	tts	B.1
peaks_nodup_uniq_B.1_infectedAll_fwd_peak_3500	LOC103229743	7.93	8.51607	9.75911	intergenic	B.1
peaks_nodup_uniq_B.1_infectedAll_fwd_peak_3503	AMN	3.96	4.73505	2.67066	intron	B.1
peaks_nodup_uniq_B.1_infectedAll_fwd_peak_3508	APOPT1	5.94	5.78734	3.02968	exon	B.1
peaks_nodup_uniq_B.1_infectedAll_fwd_peak_3510	KIF26A	13.87	3.71781	1.7246	exon	B.1
peaks_nodup_uniq_B.1_infectedAll_fwd_peak_3511a	ADSSL1	10.9	3.96627	1.40639	exon	B.1
peaks_nodup_uniq_B.1_infectedAll_fwd_peak_3511b	ADSSL1	11.39	4.42651	2.43186	exon	B.1
peaks_nodup_uniq_B.1_infectedAll_fwd_peak_3513	CEP170B	10.9	3.96627	1.40639	exon	B.1
peaks_nodup_uniq_B.1_infectedAll_fwd_peak_3518	C24H14orf80	15.36	3.27149	1.6067	exon	B.1
peaks_nodup_uniq_B.1_infectedAll_fwd_peak_3519	LOC103229809	11.39	6.19711	4.65099	intergenic	B.1
peaks_nodup_uniq_B.1_infectedAll_fwd_peak_3520	C25H1orf35	21.8	7.59922	9.83165	intron	B.1
peaks_nodup_uniq_B.1_infectedAll_fwd_peak_3522	CDC42BPA	5.94	5.78734	3.02968	intron	B.1
peaks_nodup_uniq_B.1_infectedAll_fwd_peak_3523	LOC103229983	3.96	4.43144	1.42553	intron	B.1
peaks_nodup_uniq_B.1_infectedAll_fwd_peak_3524	LOC103229983	4.95	5.31608	2.71768	intron	B.1
peaks_nodup_uniq_B.1_infectedAll_fwd_peak_3527	PARP1	9.91	5.45401	2.89974	exon	B.1
peaks_nodup_uniq_B.1_infectedAll_fwd_peak_3528	LOC103229995	23.78	9.53048	13.6015	intron	B.1
peaks_nodup_uniq_B.1_infectedAll_fwd_peak_3529	SDE2	47.56	3.46846	8.04561	exon	B.1
peaks_nodup_uniq_B.1_infectedAll_fwd_peak_3530	SDE2	12.39	4.46168	2.67743	intron	B.1
peaks_nodup_uniq_B.1_infectedAll_fwd_peak_3532	WDR26	15.85	3.37057	1.6067	promoter-tss	B.1
peaks_nodup_uniq_B.1_infectedAll_fwd_peak_3534	TP53BP2	6.44	5.23959	2.58022	intron	B.1
peaks_nodup_uniq_B.1_infectedAll_fwd_peak_3535	LOC103230024	35.17	2.41157	2.3121	exon	B.1
peaks_nodup_uniq_B.1_infectedAll_fwd_peak_3538a	TLR5	18.33	4.83246	4.79696	intergenic	B.1
peaks_nodup_uniq_B.1_infectedAll_fwd_peak_3538b	TLR5	21.8	5.69941	6.93219	intergenic	B.1
peaks_nodup_uniq_B.1_infectedAll_fwd_peak_3539	TLR5	21.3	5.57556	6.93219	intergenic	B.1
peaks_nodup_uniq_B.1_infectedAll_fwd_peak_3544	LOC103230080	3.47	4.26242	2.67066	intergenic	B.1
peaks_nodup_uniq_B.1_infectedAll_fwd_peak_3547	LOC103230081	11.39	4.13141	2.04123	tts	B.1
peaks_nodup_uniq_B.1_infectedAll_fwd_peak_3548	GPATCH2	24.77	3.22126	2.91293	exon	B.1
peaks_nodup_uniq_B.1_infectedAll_fwd_peak_3553	LOC103230103	24.77	2.86334	2.09477	exon	B.1
peaks_nodup_uniq_B.1_infectedAll_fwd_peak_3557	NEK2	6.94	4.78049	1.52773	intron	B.1
peaks_nodup_uniq_B.1_infectedAll_fwd_peak_3558	SLC30A1	6.94	5.2208	2.05981	intergenic	B.1
peaks_nodup_uniq_B.1_infectedAll_fwd_peak_3561a	RAB7B	6.94	6.61301	4.32004	promoter-tss	B.1
peaks_nodup_uniq_B.1_infectedAll_fwd_peak_3561b	RAB7B	5.45	6.15293	6.06467	promoter-tss	B.1
peaks_nodup_uniq_B.1_infectedAll_fwd_peak_3563	LOC103230209	3.47	4.13686	1.99324	intergenic	B.1
peaks_nodup_uniq_B.1_infectedAll_fwd_peak_3565	LOC103230209	4.46	4.54884	1.86202	intergenic	B.1
peaks_nodup_uniq_B.1_infectedAll_fwd_peak_3568	NUAK2	28.24	3.39975	4.26922	exon	B.1
peaks_nodup_uniq_B.1_infectedAll_fwd_peak_3569	LOC103230234	14.37	3.84166	2.30038	exon	B.1
peaks_nodup_uniq_B.1_infectedAll_fwd_peak_3570	RBBP5	3.47	4.21491	2.39042	exon	B.1
peaks_nodup_uniq_B.1_infectedAll_fwd_peak_3571	RBBP5	5.45	5.37451	3.02968	exon	B.1
peaks_nodup_uniq_B.1_infectedAll_fwd_peak_3576	PLEKHA6	5.94	4.96058	1.66867	exon	B.1
peaks_nodup_uniq_B.1_infectedAll_fwd_peak_3578b	GOLT1A	26.75	4.62528	6.48169	exon	B.1
peaks_nodup_uniq_B.1_infectedAll_fwd_peak_3580	PHLDA3	19.32	3.38677	2.54555	exon	B.1
peaks_nodup_uniq_B.1_infectedAll_fwd_peak_3581	TNNT2	4.46	5.14963	3.94577	exon	B.1
peaks_nodup_uniq_B.1_infectedAll_fwd_peak_3583	KIF21B	3.96	4.68227	2.39042	intron	B.1
peaks_nodup_uniq_B.1_infectedAll_fwd_peak_3585a	ZNF281	18.83	3.00382	1.47608	exon	B.1
peaks_nodup_uniq_B.1_infectedAll_fwd_peak_3586	ZNF281	13.38	3.59396	1.7246	exon	B.1
peaks_nodup_uniq_B.1_infectedAll_fwd_peak_3589	LOC103230371	4.95	5.13277	2.25057	exon	B.1
peaks_nodup_uniq_B.1_infectedAll_fwd_peak_3590	LOC103230371	8.92	6.19826	3.60416	exon	B.1
peaks_nodup_uniq_B.1_infectedAll_fwd_peak_3593	ASPM	8.92	8.26435	7.04255	exon	B.1
peaks_nodup_uniq_B.1_infectedAll_fwd_peak_3600	UCHL5	12.39	6.69251	5.61698	intron	B.1
peaks_nodup_uniq_B.1_infectedAll_fwd_peak_3601	IVNS1ABP	24.77	2.86334	2.09477	intron	B.1
peaks_nodup_uniq_B.1_infectedAll_fwd_peak_3604	EDEM3	15.85	6.48186	6.02691	exon	B.1
peaks_nodup_uniq_B.1_infectedAll_fwd_peak_3605	LOC103230436	10.4	5.70171	3.76479	exon	B.1
peaks_nodup_uniq_B.1_infectedAll_fwd_peak_3606	ARPC5	29.23	3.77858	5.45222	promoter-tss	B.1
peaks_nodup_uniq_B.1_infectedAll_fwd_peak_3607	NCF2	4.46	5.14963	3.94577	exon	B.1
peaks_nodup_uniq_B.1_infectedAll_fwd_peak_3617	TOR1AIP2	24.27	3.15933	2.91293	exon	B.1
peaks_nodup_uniq_B.1_infectedAll_fwd_peak_3618	ABL2	15.36	4.08936	2.87436	exon	B.1
peaks_nodup_uniq_B.1_infectedAll_fwd_peak_3621	LOC103230542	3.96	4.43144	1.42553	intron	B.1
peaks_nodup_uniq_B.1_infectedAll_fwd_peak_3622	RC3H1	15.85	4.68134	3.56463	promoter-tss	B.1
peaks_nodup_uniq_B.1_infectedAll_fwd_peak_3623	LOC103231037	7.43	4.21551	1.33247	exon	B.1
peaks_nodup_uniq_B.1_infectedAll_fwd_peak_3626	TNFSF4	5.94	5.51176	2.54682	promoter-tss	B.1
peaks_nodup_uniq_B.1_infectedAll_fwd_peak_3628a	TNFSF4	5.45	6.08435	5.62483	exon	B.1
peaks_nodup_uniq_B.1_infectedAll_fwd_peak_3633	GPR161	5.94	5.78734	3.02968	exon	B.1
peaks_nodup_uniq_B.1_infectedAll_fwd_peak_3635a	CREG1	12.88	4.62681	2.67743	exon	B.1
peaks_nodup_uniq_B.1_infectedAll_fwd_peak_3636	RHOU	3.96	4.73505	2.67066	intergenic	B.1
peaks_nodup_uniq_B.1_infectedAll_fwd_peak_3638	URB2	11.89	4.29654	2.04123	exon	B.1
peaks_nodup_uniq_B.1_infectedAll_fwd_peak_3640a	GALNT2	11.39	6.88568	5.60238	intron	B.1
peaks_nodup_uniq_B.1_infectedAll_fwd_peak_3640b	GALNT2	19.82	6.93868	8.0838	intron	B.1
peaks_nodup_uniq_B.1_infectedAll_fwd_peak_3645	LOC103230782	3.96	4.73505	2.67066	exon	B.1
peaks_nodup_uniq_B.1_infectedAll_fwd_peak_3653	SDCCAG8	5.45	4.60672	1.66867	promoter-tss	B.1
peaks_nodup_uniq_B.1_infectedAll_fwd_peak_3655	SDCCAG8	18.83	3.30421	2.04029	intron	B.1
peaks_nodup_uniq_B.1_infectedAll_fwd_peak_3656	LOC103230870	13.87	3.71781	1.7246	intron	B.1
peaks_nodup_uniq_B.1_infectedAll_fwd_peak_3661	LOC103230892	11.39	4.13141	2.04123	exon	B.1
peaks_nodup_uniq_B.1_infectedAll_fwd_peak_3665b	LOC103230914	20.31	3.32991	2.62599	exon	B.1
peaks_nodup_uniq_B.1_infectedAll_fwd_peak_3666	LOC103230914	21.3	7.43408	9.83165	exon	B.1
peaks_nodup_uniq_B.1_infectedAll_fwd_peak_3668	EFTUD1	24.77	3.22126	2.91293	exon	B.1
peaks_nodup_uniq_B.1_infectedAll_fwd_peak_3669	MESDC2	30.71	3.96436	5.98685	exon	B.1
peaks_nodup_uniq_B.1_infectedAll_fwd_peak_3671	RASGRF1	4.46	5.20768	4.32004	intergenic	B.1
peaks_nodup_uniq_B.1_infectedAll_fwd_peak_3672	CTSH	11.39	6.19711	4.65099	intron	B.1
peaks_nodup_uniq_B.1_infectedAll_fwd_peak_3673	DNAJA4	4.46	5.14963	3.94577	tts	B.1
peaks_nodup_uniq_B.1_infectedAll_fwd_peak_3674	LOC103245262	4.46	4.54884	1.86202	intron	B.1
peaks_nodup_uniq_B.1_infectedAll_fwd_peak_3676	LOC103245268	9.91	5.45401	2.89974	exon	B.1
peaks_nodup_uniq_B.1_infectedAll_fwd_peak_3677	TSPAN3	6.44	4.65013	1.73039	exon	B.1
peaks_nodup_uniq_B.1_infectedAll_fwd_peak_3682	SIN3A	7.93	6.37601	3.73502	intron	B.1
peaks_nodup_uniq_B.1_infectedAll_fwd_peak_3683	LOC103245298	21.8	3.25681	2.49777	intron	B.1
peaks_nodup_uniq_B.1_infectedAll_fwd_peak_3690	NPTN	20.31	3.55191	3.02126	intron	B.1
peaks_nodup_uniq_B.1_infectedAll_fwd_peak_3693b	ADPGK	18.33	4.83246	4.79696	exon	B.1
peaks_nodup_uniq_B.1_infectedAll_fwd_peak_3695	PARP6	4.46	5.14963	3.94577	intergenic	B.1
peaks_nodup_uniq_B.1_infectedAll_fwd_peak_3696	NR2E3	6.44	5.31444	2.67066	intron	B.1
peaks_nodup_uniq_B.1_infectedAll_fwd_peak_3697	NR2E3	16.84	8.11074	8.50548	exon	B.1
peaks_nodup_uniq_B.1_infectedAll_fwd_peak_3698	NR2E3	8.42	7.85152	7.04255	exon	B.1
peaks_nodup_uniq_B.1_infectedAll_fwd_peak_3699	NR2E3	4.46	4.54884	1.86202	intergenic	B.1
peaks_nodup_uniq_B.1_infectedAll_fwd_peak_3700	LOC103245389	10.9	3.96627	1.40639	exon	B.1
peaks_nodup_uniq_B.1_infectedAll_fwd_peak_3702a	UACA	19.82	2.97372	1.58946	exon	B.1
peaks_nodup_uniq_B.1_infectedAll_fwd_peak_3702b	UACA	38.15	2.79613	4.0714	exon	B.1
peaks_nodup_uniq_B.1_infectedAll_fwd_peak_3702c	UACA	31.21	3.74538	5.78146	exon	B.1
peaks_nodup_uniq_B.1_infectedAll_fwd_peak_3708	DENND4A	14.86	4.95689	3.67695	exon	B.1
peaks_nodup_uniq_B.1_infectedAll_fwd_peak_3709	IGDCC3	25.27	3.28318	3.39781	intron	B.1
peaks_nodup_uniq_B.1_infectedAll_fwd_peak_3719	FBXL22	14.37	5.12221	4.12138	exon	B.1
peaks_nodup_uniq_B.1_infectedAll_fwd_peak_3720	CA12	17.83	9.41722	10.6743	intron	B.1
peaks_nodup_uniq_B.1_infectedAll_fwd_peak_3721	LACTB	4.95	5.31608	2.71768	intergenic	B.1
peaks_nodup_uniq_B.1_infectedAll_fwd_peak_3726	NARG2	12.88	6.94021	5.61698	exon	B.1
peaks_nodup_uniq_B.1_infectedAll_fwd_peak_3727	LOC103245534	6.94	5.6683	2.67066	exon	B.1
peaks_nodup_uniq_B.1_infectedAll_fwd_peak_3728	ANXA2	12.88	4.62681	2.67743	intron	B.1
peaks_nodup_uniq_B.1_infectedAll_fwd_peak_3731	LDHAL6B	7.93	4.46321	1.33247	intron	B.1
peaks_nodup_uniq_B.1_infectedAll_fwd_peak_3734	SLTM	28.24	4.87298	7.74419	intron	B.1
peaks_nodup_uniq_B.1_infectedAll_fwd_peak_3735	SLTM	7.43	4.21551	1.33247	intron	B.1
peaks_nodup_uniq_B.1_infectedAll_fwd_peak_3736	LOC103245553	37.16	3.81551	7.31435	intron	B.1
peaks_nodup_uniq_B.1_infectedAll_fwd_peak_3737	LOC103245553	25.76	3.82298	4.48438	intron	B.1
peaks_nodup_uniq_B.1_infectedAll_fwd_peak_3739	LOC103245563	4.95	4.96168	1.86202	intron	B.1
peaks_nodup_uniq_B.1_infectedAll_fwd_peak_3744	MNS1	5.45	5.7584	4.13483	intron	B.1
peaks_nodup_uniq_B.1_infectedAll_fwd_peak_3745	MNS1	8.92	4.95861	2.09477	intron	B.1
peaks_nodup_uniq_B.1_infectedAll_fwd_peak_3749a	NEDD4	18.33	3.86597	3.17047	exon	B.1
peaks_nodup_uniq_B.1_infectedAll_fwd_peak_3753a	CCPG1	18.33	4.83246	4.79696	exon	B.1
peaks_nodup_uniq_B.1_infectedAll_fwd_peak_3753b	CCPG1	15.36	5.45248	4.83639	exon	B.1
peaks_nodup_uniq_B.1_infectedAll_fwd_peak_3755	MYO5C	11.39	4.13141	2.04123	intron	B.1
peaks_nodup_uniq_B.1_infectedAll_fwd_peak_3756	MYO5C	3.96	4.51201	1.68584	intron	B.1
peaks_nodup_uniq_B.1_infectedAll_fwd_peak_3759	LOC103245616	3.47	4.26242	2.67066	tts	B.1
peaks_nodup_uniq_B.1_infectedAll_fwd_peak_3761	LOC103245623	7.43	4.21551	1.33247	exon	B.1
peaks_nodup_uniq_B.1_infectedAll_fwd_peak_3764	HDC	18.83	3.30421	2.04029	exon	B.1
peaks_nodup_uniq_B.1_infectedAll_fwd_peak_3765	COPS2	32.7	3.06332	3.88483	exon	B.1
peaks_nodup_uniq_B.1_infectedAll_fwd_peak_3766a	SHC4	20.31	3.55191	3.02126	exon	B.1
peaks_nodup_uniq_B.1_infectedAll_fwd_peak_3766b	SHC4	31.21	4.60147	7.95345	exon	B.1
peaks_nodup_uniq_B.1_infectedAll_fwd_peak_3767	SHC4	8.42	4.28265	1.6067	exon	B.1
peaks_nodup_uniq_B.1_infectedAll_fwd_peak_3768	MYEF2	7.43	4.90175	2.16291	intron	B.1
peaks_nodup_uniq_B.1_infectedAll_fwd_peak_3772	WDR76	20.31	5.32786	6.19675	intron	B.1
peaks_nodup_uniq_B.1_infectedAll_fwd_peak_3775	TP53BP1	8.92	4.95861	2.09477	intron	B.1
peaks_nodup_uniq_B.1_infectedAll_fwd_peak_3786	CAPN3	13.38	3.59396	1.7246	exon	B.1
peaks_nodup_uniq_B.1_infectedAll_fwd_peak_3787	TMEM87A	7.43	4.21551	1.33247	intron	B.1
peaks_nodup_uniq_B.1_infectedAll_fwd_peak_3788	EHD4	11.39	6.19711	4.65099	exon	B.1
peaks_nodup_uniq_B.1_infectedAll_fwd_peak_3790	SPTBN5	18.83	3.54022	2.47421	exon	B.1
peaks_nodup_uniq_B.1_infectedAll_fwd_peak_3792	C26H15orf62	12.39	4.46168	2.67743	intron	B.1
peaks_nodup_uniq_B.1_infectedAll_fwd_peak_3795	AQR	10.9	5.94941	3.76479	intron	B.1
peaks_nodup_uniq_B.1_infectedAll_fwd_peak_3796	LOC103245901	3.96	4.73505	2.67066	intron	B.1
peaks_nodup_uniq_B.1_infectedAll_fwd_peak_3798	LOC103245919	5.45	4.74221	1.86644	exon	B.1
peaks_nodup_uniq_B.1_infectedAll_fwd_peak_3803	FAN1	15.85	3.37057	1.6067	tts	B.1
peaks_nodup_uniq_B.1_infectedAll_fwd_peak_3804	FAN1	23.78	4.12988	4.65919	tts	B.1
peaks_nodup_uniq_B.1_infectedAll_fwd_peak_3805	LOC103245957	4.46	4.54884	1.86202	intron	B.1
peaks_nodup_uniq_B.1_infectedAll_fwd_peak_3807	OCA2	13.87	3.71781	1.7246	exon	B.1
peaks_nodup_uniq_B.1_infectedAll_fwd_peak_3812	UBE3A	5.45	4.96109	2.24285	intron	B.1
peaks_nodup_uniq_B.1_infectedAll_fwd_peak_3813	LOC103246025	8.42	4.71091	2.09477	exon	B.1
peaks_nodup_uniq_B.1_infectedAll_fwd_peak_3814	FRYL	11.89	4.29654	2.04123	promoter-tss	B.1
peaks_nodup_uniq_B.1_infectedAll_fwd_peak_3815a	FRYL	3.47	4.06164	1.68584	exon	B.1
peaks_nodup_uniq_B.1_infectedAll_fwd_peak_3815b	FRYL	5.94	6.31347	4.50522	exon	B.1
peaks_nodup_uniq_B.1_infectedAll_fwd_peak_3816	ZAR1	15.36	8.17872	8.51948	exon	B.1
peaks_nodup_uniq_B.1_infectedAll_fwd_peak_3817	NIPAL1	9.91	5.45401	2.89974	intergenic	B.1
peaks_nodup_uniq_B.1_infectedAll_fwd_peak_3818	CNGA1	3.47	4.26242	2.67066	intron	B.1
peaks_nodup_uniq_B.1_infectedAll_fwd_peak_3822	APBB2	31.71	2.72547	2.69317	exon	B.1
peaks_nodup_uniq_B.1_infectedAll_fwd_peak_3826	RBM47	19.82	3.46934	2.54555	exon	B.1
peaks_nodup_uniq_B.1_infectedAll_fwd_peak_3828	UBE2K	14.86	5.66501	4.60825	exon	B.1
peaks_nodup_uniq_B.1_infectedAll_fwd_peak_3829	RFC1	9.41	5.20631	2.89974	intron	B.1
peaks_nodup_uniq_B.1_infectedAll_fwd_peak_3831	LOC103246212	3.47	4.26242	2.67066	intron	B.1
peaks_nodup_uniq_B.1_infectedAll_fwd_peak_3832	PGM2	5.94	6.62556	6.06467	intergenic	B.1
peaks_nodup_uniq_B.1_infectedAll_fwd_peak_3833	C27H4orf19	8.92	4.95861	2.09477	intron	B.1
peaks_nodup_uniq_B.1_infectedAll_fwd_peak_3835a	ARAP2	14.37	3.84166	2.30038	promoter-tss	B.1
peaks_nodup_uniq_B.1_infectedAll_fwd_peak_3835c	ARAP2	14.37	4.80207	3.67695	promoter-tss	B.1
peaks_nodup_uniq_B.1_infectedAll_fwd_peak_3835d	ARAP2	15.85	3.37057	1.6067	promoter-tss	B.1
peaks_nodup_uniq_B.1_infectedAll_fwd_peak_3836	LOC103246231	5.45	4.60672	1.66867	intron	B.1
peaks_nodup_uniq_B.1_infectedAll_fwd_peak_3842	PPARGC1A	12.88	4.62681	2.67743	exon	B.1
peaks_nodup_uniq_B.1_infectedAll_fwd_peak_3843	LOC103246281	11.89	5.85892	3.94577	exon	B.1
peaks_nodup_uniq_B.1_infectedAll_fwd_peak_3846	LOC103246304	10.9	3.96627	1.40639	exon	B.1
peaks_nodup_uniq_B.1_infectedAll_fwd_peak_3849	FBXL5	5.45	4.74221	1.86644	tts	B.1
peaks_nodup_uniq_B.1_infectedAll_fwd_peak_3851	LOC103246336	3.47	4.26242	2.67066	intergenic	B.1
peaks_nodup_uniq_B.1_infectedAll_fwd_peak_3853	BOD1L1	26.26	2.47784	1.50574	exon	B.1
peaks_nodup_uniq_B.1_infectedAll_fwd_peak_3854	BOD1L1	12.88	6.67328	5.26669	intron	B.1
peaks_nodup_uniq_B.1_infectedAll_fwd_peak_3855	BOD1L1	21.3	3.71704	3.56463	exon	B.1
peaks_nodup_uniq_B.1_infectedAll_fwd_peak_3857	BOD1L1	18.83	3.96505	3.17047	exon	B.1
peaks_nodup_uniq_B.1_infectedAll_fwd_peak_3859a	BOD1L1	16.35	4.33706	3.49873	exon	B.1
peaks_nodup_uniq_B.1_infectedAll_fwd_peak_3859b	BOD1L1	26.75	4.62528	6.48169	exon	B.1
peaks_nodup_uniq_B.1_infectedAll_fwd_peak_3860	BOD1L1	21.3	5.57556	6.93219	exon	B.1
peaks_nodup_uniq_B.1_infectedAll_fwd_peak_3864	LOC103246543	16.84	4.24849	3.15737	exon	B.1
peaks_nodup_uniq_B.1_infectedAll_fwd_peak_3867	LOC103246546	5.94	6.62556	6.06467	intron	B.1
peaks_nodup_uniq_B.1_infectedAll_fwd_peak_3869	MSX1	8.42	6.92781	5.17804	intergenic	B.1
peaks_nodup_uniq_B.1_infectedAll_fwd_peak_3871	WFS1	5.45	4.74221	1.86644	exon	B.1
peaks_nodup_uniq_B.1_infectedAll_fwd_peak_3872	MRFAP1	4.46	5.20768	4.32004	tts	B.1
peaks_nodup_uniq_B.1_infectedAll_fwd_peak_3876	MRFAP1	26.75	2.8908	2.47932	exon	B.1
peaks_nodup_uniq_B.1_infectedAll_fwd_peak_3877	LOC103246410	8.42	7.85152	7.04255	exon	B.1
peaks_nodup_uniq_B.1_infectedAll_fwd_peak_3878	KIAA0232	10.4	3.80114	1.40639	exon	B.1
peaks_nodup_uniq_B.1_infectedAll_fwd_peak_3879b	KIAA0232	10.4	5.18337	3.09866	exon	B.1
peaks_nodup_uniq_B.1_infectedAll_fwd_peak_3880	CCDC96	16.84	5.94788	5.64899	exon	B.1
peaks_nodup_uniq_B.1_infectedAll_fwd_peak_3881b	LOC103246419	13.87	5.7197	4.35689	exon	B.1
peaks_nodup_uniq_B.1_infectedAll_fwd_peak_3882	LOC103246418	3.47	4.26242	2.67066	intergenic	B.1
peaks_nodup_uniq_B.1_infectedAll_fwd_peak_3885	LRPAP1	7.43	4.21551	1.33247	intron	B.1
peaks_nodup_uniq_B.1_infectedAll_fwd_peak_3886	LOC103246444	16.35	3.46965	2.09477	exon	B.1
peaks_nodup_uniq_B.1_infectedAll_fwd_peak_3887	LOC103246451	40.13	3.42729	6.65597	intron	B.1
peaks_nodup_uniq_B.1_infectedAll_fwd_peak_3890	TNIP2	9.91	4.95819	2.35114	intron	B.1
peaks_nodup_uniq_B.1_infectedAll_fwd_peak_3891	TNIP2	7.93	4.46321	1.33247	intron	B.1
peaks_nodup_uniq_B.1_infectedAll_fwd_peak_3893	POLN	5.94	4.96058	1.66867	exon	B.1
peaks_nodup_uniq_B.1_infectedAll_fwd_peak_3896	LETM1	17.34	3.66781	2.66879	exon	B.1
peaks_nodup_uniq_B.1_infectedAll_fwd_peak_3897	SLBP	7.93	4.46321	1.33247	intron	B.1
peaks_nodup_uniq_B.1_infectedAll_fwd_peak_3898	FAM53A	3.96	4.59556	1.99324	intron	B.1
peaks_nodup_uniq_B.1_infectedAll_fwd_peak_3899	FAM53A	3.47	4.26242	2.67066	intron	B.1
peaks_nodup_uniq_B.1_infectedAll_fwd_peak_3902	LOC103246498	8.92	4.95861	2.09477	intron	B.1
peaks_nodup_uniq_B.1_infectedAll_fwd_peak_3908	CPLX1	3.47	4.26242	2.67066	intergenic	B.1
peaks_nodup_uniq_B.1_infectedAll_fwd_peak_3909a	CPLX1	12.39	4.46168	2.67743	intron	B.1
peaks_nodup_uniq_B.1_infectedAll_fwd_peak_3909b	CPLX1	13.38	6.53447	5.68273	intron	B.1
peaks_nodup_uniq_B.1_infectedAll_fwd_peak_3910	LOC103246512	6.94	5.51084	2.46115	intron	B.1
peaks_nodup_uniq_B.1_infectedAll_fwd_peak_3911	LOC103246512	17.34	3.66781	2.66879	intron	B.1
peaks_nodup_uniq_B.1_infectedAll_fwd_peak_3914	TRNAT-UGU	11.39	5.63374	3.94577	intergenic	B.1
peaks_nodup_uniq_B.1_infectedAll_fwd_peak_3915	TRNAT-UGU	7.43	6.02216	3.73502	intergenic	B.1
peaks_nodup_uniq_B.1_infectedAll_fwd_peak_3917	LOC103246584	10.9	6.61046	4.58597	intron	B.1
peaks_nodup_uniq_B.1_infectedAll_fwd_peak_3919	LOC103246597	3.47	3.98911	1.42553	promoter-tss	B.1
peaks_nodup_uniq_B.1_infectedAll_fwd_peak_3921	LOC103246603	4.46	4.54884	1.86202	intron	B.1
peaks_nodup_uniq_B.1_infectedAll_fwd_peak_3926	ABHD11	9.91	5.45401	2.89974	tts	B.1
peaks_nodup_uniq_B.1_infectedAll_fwd_peak_3930	BCL7B	11.89	6.44481	4.65099	intron	B.1
peaks_nodup_uniq_B.1_infectedAll_fwd_peak_3932	SRRM3	9.91	5.45401	2.89974	intron	B.1
peaks_nodup_uniq_B.1_infectedAll_fwd_peak_3934	UPK3B	4.46	5.14963	3.94577	intron	B.1
peaks_nodup_uniq_B.1_infectedAll_fwd_peak_3935	LOC103246670	3.47	3.98911	1.42553	intron	B.1
peaks_nodup_uniq_B.1_infectedAll_fwd_peak_3936	LRWD1	8.92	6.19826	3.60416	exon	B.1
peaks_nodup_uniq_B.1_infectedAll_fwd_peak_3937	ORAI2	4.46	4.54884	1.86202	intron	B.1
peaks_nodup_uniq_B.1_infectedAll_fwd_peak_3940	COL26A1	3.96	4.73505	2.67066	intron	B.1
peaks_nodup_uniq_B.1_infectedAll_fwd_peak_3941	NAT16	22.29	2.58812	1.31053	exon	B.1
peaks_nodup_uniq_B.1_infectedAll_fwd_peak_3942	NAT16	30.71	2.64291	2.34895	intron	B.1
peaks_nodup_uniq_B.1_infectedAll_fwd_peak_3945	UFSP1	11.89	4.29654	2.04123	intron	B.1
peaks_nodup_uniq_B.1_infectedAll_fwd_peak_3946	GIGYF1	15.36	4.08936	2.87436	exon	B.1
peaks_nodup_uniq_B.1_infectedAll_fwd_peak_3948	TSC22D4	17.34	3.05651	1.57294	promoter-tss	B.1
peaks_nodup_uniq_B.1_infectedAll_fwd_peak_3949	TSC22D4	20.31	3.55191	3.02126	exon	B.1
peaks_nodup_uniq_B.1_infectedAll_fwd_peak_3950	TRIM4	4.46	4.87376	2.71768	intron	B.1
peaks_nodup_uniq_B.1_infectedAll_fwd_peak_3951	LOC103246764	16.35	5.78275	5.64899	exon	B.1
peaks_nodup_uniq_B.1_infectedAll_fwd_peak_3952	LOC103246766	3.47	4.06164	1.68584	intron	B.1
peaks_nodup_uniq_B.1_infectedAll_fwd_peak_3954	LOC103246770	3.47	4.13686	1.99324	intron	B.1
peaks_nodup_uniq_B.1_infectedAll_fwd_peak_3955	LOC103246769	35.17	3.61735	6.26253	intron	B.1
peaks_nodup_uniq_B.1_infectedAll_fwd_peak_3957	LOC103246779	15.36	3.7176	2.32146	exon	B.1
peaks_nodup_uniq_B.1_infectedAll_fwd_peak_3958a	PTCD1	7.43	4.21551	1.33247	exon	B.1
peaks_nodup_uniq_B.1_infectedAll_fwd_peak_3958b	PTCD1	8.92	4.95861	2.09477	exon	B.1
peaks_nodup_uniq_B.1_infectedAll_fwd_peak_3959	PTCD1	12.39	6.69251	5.61698	intron	B.1
peaks_nodup_uniq_B.1_infectedAll_fwd_peak_3960b	PTCD1	14.37	3.65872	2.02602	tts	B.1
peaks_nodup_uniq_B.1_infectedAll_fwd_peak_3964	SMURF1	9.41	4.33859	1.86202	promoter-tss	B.1
peaks_nodup_uniq_B.1_infectedAll_fwd_peak_3969a	LOC103246808	20.31	3.04449	2.0272	exon	B.1
peaks_nodup_uniq_B.1_infectedAll_fwd_peak_3969b	LOC103246808	21.8	3.79961	3.56463	exon	B.1
peaks_nodup_uniq_B.1_infectedAll_fwd_peak_3969c	LOC103246808	34.68	5.09687	9.87515	exon	B.1
peaks_nodup_uniq_B.1_infectedAll_fwd_peak_3970	LOC103246808	39.14	2.86691	4.45262	exon	B.1
peaks_nodup_uniq_B.1_infectedAll_fwd_peak_3971	LOC103246808	14.37	5.12221	4.12138	exon	B.1
peaks_nodup_uniq_B.1_infectedAll_fwd_peak_3976	ZNF853	12.88	6.30929	4.79696	exon	B.1
peaks_nodup_uniq_B.1_infectedAll_fwd_peak_3977	ZNF316	26.26	3.40703	3.8865	exon	B.1
peaks_nodup_uniq_B.1_infectedAll_fwd_peak_3981	LOC103246838	10.9	5.94941	3.76479	promoter-tss	B.1
peaks_nodup_uniq_B.1_infectedAll_fwd_peak_3982	TNRC18	10.9	3.96627	1.40639	exon	B.1
peaks_nodup_uniq_B.1_infectedAll_fwd_peak_3983	TNRC18	8.92	6.19826	3.60416	intron	B.1
peaks_nodup_uniq_B.1_infectedAll_fwd_peak_3984a	TNRC18	10.4	3.80114	1.40639	exon	B.1
peaks_nodup_uniq_B.1_infectedAll_fwd_peak_3984b	TNRC18	12.88	4.62681	2.67743	exon	B.1
peaks_nodup_uniq_B.1_infectedAll_fwd_peak_3985	TNRC18	10.4	8.26335	7.42256	intron	B.1
peaks_nodup_uniq_B.1_infectedAll_fwd_peak_3986	TNRC18	8.92	6.98396	4.67921	intron	B.1
peaks_nodup_uniq_B.1_infectedAll_fwd_peak_3987	SLC29A4	7.93	4.46321	1.33247	intron	B.1
peaks_nodup_uniq_B.1_infectedAll_fwd_peak_3988	SLC29A4	7.43	5.77467	3.35321	intron	B.1
peaks_nodup_uniq_B.1_infectedAll_fwd_peak_3989	SLC29A4	14.86	4.40612	2.89974	exon	B.1
peaks_nodup_uniq_B.1_infectedAll_fwd_peak_3991	SLC29A4	7.43	5.26939	2.66879	intron	B.1
peaks_nodup_uniq_B.1_infectedAll_fwd_peak_3992	RADIL	13.87	10.6223	11.0708	exon	B.1
peaks_nodup_uniq_B.1_infectedAll_fwd_peak_3995	AMZ1	18.83	3.09769	1.66867	exon	B.1
peaks_nodup_uniq_B.1_infectedAll_fwd_peak_3996	AMZ1	27.25	3.53088	4.36363	exon	B.1
peaks_nodup_uniq_B.1_infectedAll_fwd_peak_4004a	MAFK	5.94	5.69247	2.8613	intergenic	B.1
peaks_nodup_uniq_B.1_infectedAll_fwd_peak_4004b	MAFK	5.45	5.2864	2.8613	intergenic	B.1
peaks_nodup_uniq_B.1_infectedAll_fwd_peak_4008	LOC103246905	5.94	5.78734	3.02968	promoter-tss	B.1
peaks_nodup_uniq_B.1_infectedAll_fwd_peak_4010	TM6SF1	8.42	4.71091	2.09477	intron	B.1
peaks_nodup_uniq_B.1_infectedAll_fwd_peak_4012	LOC103231084	9.91	4.54501	1.86202	intron	B.1
peaks_nodup_uniq_B.1_infectedAll_fwd_peak_4014	HOMER2	6.94	5.6683	2.67066	intron	B.1
peaks_nodup_uniq_B.1_infectedAll_fwd_peak_4015	LOC103231496	4.95	5.22282	2.49156	intergenic	B.1
peaks_nodup_uniq_B.1_infectedAll_fwd_peak_4018a	AKAP13	23.28	3.03548	2.49806	exon	B.1
peaks_nodup_uniq_B.1_infectedAll_fwd_peak_4019	KLHL25	30.22	2.4015	1.728	exon	B.1
peaks_nodup_uniq_B.1_infectedAll_fwd_peak_4020	KLHL25	30.71	5.28581	9.06612	exon	B.1
peaks_nodup_uniq_B.1_infectedAll_fwd_peak_4024b	LOC103231166	10.4	5.70171	3.76479	promoter-tss	B.1
peaks_nodup_uniq_B.1_infectedAll_fwd_peak_4025	LOC103231166	7.93	5.57901	2.66879	tts	B.1
peaks_nodup_uniq_B.1_infectedAll_fwd_peak_4026	GDPGP1	5.94	5.78734	3.02968	exon	B.1
peaks_nodup_uniq_B.1_infectedAll_fwd_peak_4028	PRC1	7.43	4.21551	1.33247	promoter-tss	B.1
peaks_nodup_uniq_B.1_infectedAll_fwd_peak_4031	LOC103231220	14.86	4.40612	2.89974	exon	B.1
peaks_nodup_uniq_B.1_infectedAll_fwd_peak_4033	CHD2	21.8	3.16634	2.30306	intron	B.1
peaks_nodup_uniq_B.1_infectedAll_fwd_peak_4036	LOC103231225	30.22	2.60162	2.34895	exon	B.1
peaks_nodup_uniq_B.1_infectedAll_fwd_peak_4037	NR2F2	29.23	8.39685	14.9106	promoter-tss	B.1
peaks_nodup_uniq_B.1_infectedAll_fwd_peak_4039	ARRDC4	21.8	3.79961	3.56463	exon	B.1
peaks_nodup_uniq_B.1_infectedAll_fwd_peak_4040	ARRDC4	6.44	5.31444	2.67066	exon	B.1
peaks_nodup_uniq_B.1_infectedAll_fwd_peak_4042	PGPEP1L	25.27	3.75221	4.48438	exon	B.1
peaks_nodup_uniq_B.1_infectedAll_fwd_peak_4044	SYNM	18.83	5.21717	5.21687	exon	B.1
peaks_nodup_uniq_B.1_infectedAll_fwd_peak_4045	SYNM	19.82	5.20401	5.52473	exon	B.1
peaks_nodup_uniq_B.1_infectedAll_fwd_peak_4046	SYNM	15.85	3.83019	2.32146	exon	B.1
peaks_nodup_uniq_B.1_infectedAll_fwd_peak_4047	SYNM	8.42	4.71091	2.09477	exon	B.1
peaks_nodup_uniq_B.1_infectedAll_fwd_peak_4048	LOC103231269	5.45	5.4656	3.26799	exon	B.1
peaks_nodup_uniq_B.1_infectedAll_fwd_peak_4049	MEF2A	24.27	2.80829	2.09477	intron	B.1
peaks_nodup_uniq_B.1_infectedAll_fwd_peak_4050	LYSMD4	25.76	3.34511	3.39781	exon	B.1
peaks_nodup_uniq_B.1_infectedAll_fwd_peak_4051	LOC103231510	7.93	4.46321	1.33247	intron	B.1
peaks_nodup_uniq_B.1_infectedAll_fwd_peak_4052	ASB7	11.39	6.19711	4.65099	exon	B.1
peaks_nodup_uniq_B.1_infectedAll_fwd_peak_4053	LOC103231279	6.44	5.31444	2.67066	tts	B.1
peaks_nodup_uniq_B.1_infectedAll_fwd_peak_4058	RNASE7	3.96	4.73505	2.67066	intron	B.1
peaks_nodup_uniq_B.1_infectedAll_fwd_peak_4062	RBM23	3.47	4.26242	2.67066	tts	B.1
peaks_nodup_uniq_B.1_infectedAll_fwd_peak_4064	AJUBA	14.37	7.68332	7.55213	promoter-tss	B.1
peaks_nodup_uniq_B.1_infectedAll_fwd_peak_4066	LOC103231470	27.74	4.79041	7.10315	exon	B.1
peaks_nodup_uniq_B.1_infectedAll_fwd_peak_4067	DHRS2	16.84	4.46091	3.49873	exon	B.1
peaks_nodup_uniq_B.1_infectedAll_fwd_peak_4070	LOC103248956	34.18	2.34551	1.97497	exon	B.1
peaks_nodup_uniq_B.1_infectedAll_fwd_peak_4075	ZMYM5	7.93	4.46321	1.33247	exon	B.1
peaks_nodup_uniq_B.1_infectedAll_fwd_peak_4078	MPHOSPH8	3.47	4.26242	2.67066	intron	B.1
peaks_nodup_uniq_B.1_infectedAll_fwd_peak_4082	LOC103249005	14.37	3.49242	1.76225	exon	B.1
peaks_nodup_uniq_B.1_infectedAll_fwd_peak_4083	SPATA13	13.38	4.79194	3.38877	intron	B.1
peaks_nodup_uniq_B.1_infectedAll_fwd_peak_4084	SPATA13	20.31	5.32786	6.19675	exon	B.1
peaks_nodup_uniq_B.1_infectedAll_fwd_peak_4085	C1QTNF9	13.87	3.71781	1.7246	exon	B.1
peaks_nodup_uniq_B.1_infectedAll_fwd_peak_4088	LOC103249055	5.94	6.62556	6.06467	intergenic	B.1
peaks_nodup_uniq_B.1_infectedAll_fwd_peak_4089	LNX2	18.83	3.30421	2.04029	promoter-tss	B.1
peaks_nodup_uniq_B.1_infectedAll_fwd_peak_4090	LOC103249063	10.9	4.95784	2.62196	exon	B.1
peaks_nodup_uniq_B.1_infectedAll_fwd_peak_4091	LOC103249073	7.93	4.46321	1.33247	exon	B.1
peaks_nodup_uniq_B.1_infectedAll_fwd_peak_4092	LOC103249073	4.46	4.54884	1.86202	exon	B.1
peaks_nodup_uniq_B.1_infectedAll_fwd_peak_4097	BRCA2	4.46	4.26454	1.31053	exon	B.1
peaks_nodup_uniq_B.1_infectedAll_fwd_peak_4098	PDS5B	25.27	3.28318	3.39781	exon	B.1
peaks_nodup_uniq_B.1_infectedAll_fwd_peak_4101	LOC103214269	3.47	4.26242	2.67066	intron	B.1
peaks_nodup_uniq_B.1_infectedAll_fwd_peak_4103	NBEA	6.44	5.31444	2.67066	exon	B.1
peaks_nodup_uniq_B.1_infectedAll_fwd_peak_4104	LOC103214305	12.88	6.94021	5.61698	exon	B.1
peaks_nodup_uniq_B.1_infectedAll_fwd_peak_4105	STOML3	5.45	4.60672	1.66867	exon	B.1
peaks_nodup_uniq_B.1_infectedAll_fwd_peak_4108	WBP4	6.94	6.61301	4.32004	intron	B.1
peaks_nodup_uniq_B.1_infectedAll_fwd_peak_4109	WBP4	3.47	4.13686	1.99324	intron	B.1
peaks_nodup_uniq_B.1_infectedAll_fwd_peak_4110	WBP4	4.46	5.05427	3.44109	exon	B.1
peaks_nodup_uniq_B.1_infectedAll_fwd_peak_4111	WBP4	12.39	12.7697	19.8914	exon	B.1
peaks_nodup_uniq_B.1_infectedAll_fwd_peak_4115	AKAP11	7.43	4.21551	1.33247	exon	B.1
peaks_nodup_uniq_B.1_infectedAll_fwd_peak_4116	GPALPP1	3.96	4.59556	1.99324	intron	B.1
peaks_nodup_uniq_B.1_infectedAll_fwd_peak_4117	GPALPP1	6.44	6.20018	4.32004	intron	B.1
peaks_nodup_uniq_B.1_infectedAll_fwd_peak_4118	GPALPP1	4.95	4.96168	1.86202	intron	B.1
peaks_nodup_uniq_B.1_infectedAll_fwd_peak_4120	ESD	7.43	4.21551	1.33247	exon	B.1
peaks_nodup_uniq_B.1_infectedAll_fwd_peak_4123	LOC103214416	9.91	5.45401	2.89974	intron	B.1
peaks_nodup_uniq_B.1_infectedAll_fwd_peak_4128b	UTP14C	5.94	4.89071	1.57943	exon	B.1
peaks_nodup_uniq_B.1_infectedAll_fwd_peak_4128c	UTP14C	6.44	5.23959	2.58022	exon	B.1
peaks_nodup_uniq_B.1_infectedAll_fwd_peak_4130	THSD1	9.41	6.50789	4.60775	exon	B.1
peaks_nodup_uniq_B.1_infectedAll_fwd_peak_4133	PIBF1	4.46	4.78825	2.49156	intron	B.1
peaks_nodup_uniq_B.1_infectedAll_fwd_peak_4135	KLF5	20.31	3.04449	2.0272	exon	B.1
peaks_nodup_uniq_B.1_infectedAll_fwd_peak_4141	SLITRK5	3.47	4.13686	1.99324	exon	B.1
peaks_nodup_uniq_B.1_infectedAll_fwd_peak_4144	ABCC4	4.95	5.41274	3.02968	promoter-tss	B.1
peaks_nodup_uniq_B.1_infectedAll_fwd_peak_4145	MBNL2	7.43	4.21551	1.33247	promoter-tss	B.1
peaks_nodup_uniq_B.1_infectedAll_fwd_peak_4147	MBNL2	14.37	3.34057	1.5382	exon	B.1
peaks_nodup_uniq_B.1_infectedAll_fwd_peak_4152	ZIC2	11.89	4.29654	2.04123	exon	B.1
peaks_nodup_uniq_B.1_infectedAll_fwd_peak_4155	ERCC5	5.45	4.88592	2.09477	exon	B.1
peaks_nodup_uniq_B.1_infectedAll_fwd_peak_4156	LOC103214744	15.85	5.61761	4.83639	exon	B.1
peaks_nodup_uniq_B.1_infectedAll_fwd_peak_4157a	LOC103214744	12.88	4.33763	2.3449	exon	B.1
peaks_nodup_uniq_B.1_infectedAll_fwd_peak_4157b	LOC103214744	14.86	4.95689	3.67695	exon	B.1
peaks_nodup_uniq_B.1_infectedAll_fwd_peak_4159	MYO16	6.44	6.20018	4.32004	intron	B.1
peaks_nodup_uniq_B.1_infectedAll_fwd_peak_4160	MYO16	6.94	6.61301	4.32004	intron	B.1
peaks_nodup_uniq_B.1_infectedAll_fwd_peak_4161	LOC103214782	6.44	4.65013	1.73039	promoter-tss	B.1
peaks_nodup_uniq_B.1_infectedAll_fwd_peak_4165	LOC103214809	4.46	4.54884	1.86202	intergenic	B.1
peaks_nodup_uniq_B.1_infectedAll_fwd_peak_4168	LOC103214820	12.88	4.62681	2.67743	intron	B.1
peaks_nodup_uniq_B.1_infectedAll_fwd_peak_4172	TMCO3	25.76	3.82298	4.48438	exon	B.1
peaks_nodup_uniq_B.1_infectedAll_fwd_peak_4173	TFDP1	9.41	4.73301	2.35114	intron	B.1
peaks_nodup_uniq_B.1_infectedAll_fwd_peak_4174	TFDP1	7.43	4.21551	1.33247	intron	B.1
peaks_nodup_uniq_B.1_infectedAll_fwd_peak_4179	LOC103214854	3.47	4.26242	2.67066	intron	B.1
peaks_nodup_uniq_B.1_infectedAll_fwd_peak_4182	UPF3A	34.18	4.39783	8.2646	intron	B.1
peaks_nodup_uniq_B.1_infectedAll_fwd_peak_4184	CHAMP1	17.83	10.4636	12.1002	exon	B.1
peaks_nodup_uniq_B.1_infectedAll_fwd_peak_4185	CHAMP1	11.89	4.29654	2.04123	exon	B.1
peaks_nodup_uniq_B.1_infectedAll_fwd_peak_4189	EXOC3	8.42	5.23434	2.72856	exon	B.1
peaks_nodup_uniq_B.1_infectedAll_fwd_peak_4191	LOC103214898	7.43	5.26939	2.66879	promoter-tss	B.1
peaks_nodup_uniq_B.1_infectedAll_fwd_peak_4192	LOC103214898	18.33	3.86597	3.17047	tts	B.1
peaks_nodup_uniq_B.1_infectedAll_fwd_peak_4194	BRD9	3.96	4.43144	1.42553	intron	B.1
peaks_nodup_uniq_B.1_infectedAll_fwd_peak_4195	LOC103214916	4.46	5.20768	4.32004	intron	B.1
peaks_nodup_uniq_B.1_infectedAll_fwd_peak_4197	LOC103214935	12.39	4.46168	2.67743	intron	B.1
peaks_nodup_uniq_B.1_infectedAll_fwd_peak_4198b	LOC103214935	11.39	4.42651	2.43186	intron	B.1
peaks_nodup_uniq_B.1_infectedAll_fwd_peak_4200a	LOC103214934	9.91	6.73335	4.49268	exon	B.1
peaks_nodup_uniq_B.1_infectedAll_fwd_peak_4200b	LOC103214934	10.4	4.38593	2.13121	exon	B.1
peaks_nodup_uniq_B.1_infectedAll_fwd_peak_4204	LOC103214954	6.44	6.20018	4.32004	intron	B.1
peaks_nodup_uniq_B.1_infectedAll_fwd_peak_4206	KIAA0947	18.33	3.22164	2.04029	exon	B.1
peaks_nodup_uniq_B.1_infectedAll_fwd_peak_4212b	MTRR	13.38	7.18791	6.5495	exon	B.1
peaks_nodup_uniq_B.1_infectedAll_fwd_peak_4217	ANKRD33B	39.63	2.53951	3.09042	exon	B.1
peaks_nodup_uniq_B.1_infectedAll_fwd_peak_4218	ANKRD33B	20.31	3.55191	3.02126	exon	B.1
peaks_nodup_uniq_B.1_infectedAll_fwd_peak_4223	TRIO	35.67	3.05574	4.34368	exon	B.1
peaks_nodup_uniq_B.1_infectedAll_fwd_peak_4225a	LOC103215020	26.75	6.93791	10.828	intron	B.1
peaks_nodup_uniq_B.1_infectedAll_fwd_peak_4225b	LOC103215020	24.77	6.44251	9.20875	intron	B.1
peaks_nodup_uniq_B.1_infectedAll_fwd_peak_4226	FAM105A	22.79	2.97356	2.04217	exon	B.1
peaks_nodup_uniq_B.1_infectedAll_fwd_peak_4228	MARCH11	7.43	6.02216	3.73502	exon	B.1
peaks_nodup_uniq_B.1_infectedAll_fwd_peak_4231	CDH6	17.34	3.66781	2.66879	tts	B.1
peaks_nodup_uniq_B.1_infectedAll_fwd_peak_4234	SUB1	18.33	6.44328	7.25248	intron	B.1
peaks_nodup_uniq_B.1_infectedAll_fwd_peak_4236	RAI14	5.45	5.37451	3.02968	exon	B.1
peaks_nodup_uniq_B.1_infectedAll_fwd_peak_4237a	TTC23L	24.27	2.52747	1.40249	exon	B.1
peaks_nodup_uniq_B.1_infectedAll_fwd_peak_4237b	TTC23L	17.34	3.66781	2.66879	exon	B.1
peaks_nodup_uniq_B.1_infectedAll_fwd_peak_4237c	TTC23L	16.84	4.46091	3.49873	exon	B.1
peaks_nodup_uniq_B.1_infectedAll_fwd_peak_4239	RAD1	33.19	2.84932	3.51142	promoter-tss	B.1
peaks_nodup_uniq_B.1_infectedAll_fwd_peak_4240	RAD1	8.92	4.67793	1.79383	intron	B.1
peaks_nodup_uniq_B.1_infectedAll_fwd_peak_4245	NIPBL	33.69	4.0334	6.87012	exon	B.1
peaks_nodup_uniq_B.1_infectedAll_fwd_peak_4248	EGFLAM	4.46	5.14963	3.94577	exon	B.1
peaks_nodup_uniq_B.1_infectedAll_fwd_peak_4250	LOC103215159	19.32	3.38677	2.54555	exon	B.1
peaks_nodup_uniq_B.1_infectedAll_fwd_peak_4254a	LOC103215209	6.94	6.61301	4.32004	tts	B.1
peaks_nodup_uniq_B.1_infectedAll_fwd_peak_4255	ANXA2R	13.87	3.71781	1.7246	intergenic	B.1
peaks_nodup_uniq_B.1_infectedAll_fwd_peak_4256	LOC103215252	33.69	3.15339	4.32004	exon	B.1
peaks_nodup_uniq_B.1_infectedAll_fwd_peak_4257	NIM1K	11.39	6.19711	4.65099	exon	B.1
peaks_nodup_uniq_B.1_infectedAll_fwd_peak_4259	HMGCS1	8.92	9.46132	11.6928	exon	B.1
peaks_nodup_uniq_B.1_infectedAll_fwd_peak_4260	MRPS30	17.34	3.05651	1.57294	exon	B.1
peaks_nodup_uniq_B.1_infectedAll_fwd_peak_4263a	PELO	32.2	2.2134	1.33247	exon	B.1
[truncated: 3,436 more rows]

## Sheet: Peaks B.1.1.7
name_macs2	peakAnn_gene_name	pileup_macs2	fold_enrichment_macs2	-log10(qvalue)_macs2	short_annotation	condition
peaks_nodup_uniq_B.1.1.7_infectedAll_fwd_peak_2	LOC103241737	3.96	4.50763	1.63547	intron	B.1.1.7
peaks_nodup_uniq_B.1.1.7_infectedAll_fwd_peak_6	B4GALNT4	7.56	5.86091	3.2618	exon	B.1.1.7
peaks_nodup_uniq_B.1.1.7_infectedAll_fwd_peak_8	RNH1	6.48	4.67336	1.68133	intron	B.1.1.7
peaks_nodup_uniq_B.1.1.7_infectedAll_fwd_peak_16	RASSF7	5.04	4.79203	2.49704	exon	B.1.1.7
peaks_nodup_uniq_B.1.1.7_infectedAll_fwd_peak_26	LOC103241697	10.8	3.93187	1.35958	intron	B.1.1.7
peaks_nodup_uniq_B.1.1.7_infectedAll_fwd_peak_27	LOC103241697	5.76	4.8269	1.6213	exon	B.1.1.7
peaks_nodup_uniq_B.1.1.7_infectedAll_fwd_peak_32	LOC103236463	33.47	3.13331	4.19231	promoter-tss	B.1.1.7
peaks_nodup_uniq_B.1.1.7_infectedAll_fwd_peak_34	LOC103236414	23.03	2.67007	1.64852	intergenic	B.1.1.7
peaks_nodup_uniq_B.1.1.7_infectedAll_fwd_peak_47	IFITM10	3.6	4.10584	1.37593	intron	B.1.1.7
peaks_nodup_uniq_B.1.1.7_infectedAll_fwd_peak_48	TNNI2	3.24	4.04289	2.58003	intergenic	B.1.1.7
peaks_nodup_uniq_B.1.1.7_infectedAll_fwd_peak_74b	LOC103245420	5.76	5.63139	2.93336	exon	B.1.1.7
peaks_nodup_uniq_B.1.1.7_infectedAll_fwd_peak_85b	C1H11orf24	4.32	4.83477	2.93336	intergenic	B.1.1.7
peaks_nodup_uniq_B.1.1.7_infectedAll_fwd_peak_87	CHKA	9	4.99818	2.0394	intron	B.1.1.7
peaks_nodup_uniq_B.1.1.7_infectedAll_fwd_peak_91c	ALDH3B2	3.6	4.38612	2.58003	intron	B.1.1.7
peaks_nodup_uniq_B.1.1.7_infectedAll_fwd_peak_94	POLD4	7.56	6.1121	3.643	exon	B.1.1.7
peaks_nodup_uniq_B.1.1.7_infectedAll_fwd_peak_96	RIN1	11.52	4.17178	1.98927	exon	B.1.1.7
peaks_nodup_uniq_B.1.1.7_infectedAll_fwd_peak_99	LOC103224576	3.24	4.04289	2.58003	intron	B.1.1.7
peaks_nodup_uniq_B.1.1.7_infectedAll_fwd_peak_102	SNX32	11.16	6.07774	4.53418	intron	B.1.1.7
peaks_nodup_uniq_B.1.1.7_infectedAll_fwd_peak_104	LOC103225990	10.44	5.71788	3.67066	intron	B.1.1.7
peaks_nodup_uniq_B.1.1.7_infectedAll_fwd_peak_105	AP5B1	11.88	6.43759	4.53418	exon	B.1.1.7
peaks_nodup_uniq_B.1.1.7_infectedAll_fwd_peak_110	LOC103241899	5.04	4.31283	1.6213	promoter-tss	B.1.1.7
peaks_nodup_uniq_B.1.1.7_infectedAll_fwd_peak_118	SLC22A20	6.48	6.23114	4.19231	intron	B.1.1.7
peaks_nodup_uniq_B.1.1.7_infectedAll_fwd_peak_120	SPDYC	11.88	4.29173	1.98927	intron	B.1.1.7
peaks_nodup_uniq_B.1.1.7_infectedAll_fwd_peak_122	SNX15	6.12	6.35493	5.49908	intergenic	B.1.1.7
peaks_nodup_uniq_B.1.1.7_infectedAll_fwd_peak_124	MEN1	20.87	5.46788	6.01572	tts	B.1.1.7
peaks_nodup_uniq_B.1.1.7_infectedAll_fwd_peak_130	PLCB3	7.2	7.45189	7.48681	promoter-tss	B.1.1.7
peaks_nodup_uniq_B.1.1.7_infectedAll_fwd_peak_141	EEF1G	17.99	4.74818	4.05355	exon	B.1.1.7
peaks_nodup_uniq_B.1.1.7_infectedAll_fwd_peak_144	FADS2	21.95	4.59022	4.84495	intron	B.1.1.7
peaks_nodup_uniq_B.1.1.7_infectedAll_fwd_peak_145	FADS2	3.24	3.85335	1.63547	intron	B.1.1.7
peaks_nodup_uniq_B.1.1.7_infectedAll_fwd_peak_147a	TMEM216	13.67	3.66861	1.67778	exon	B.1.1.7
peaks_nodup_uniq_B.1.1.7_infectedAll_fwd_peak_147b	TMEM216	11.52	3.68098	1.35958	exon	B.1.1.7
peaks_nodup_uniq_B.1.1.7_infectedAll_fwd_peak_152	CD5	6.84	6.53102	4.19231	intron	B.1.1.7
peaks_nodup_uniq_B.1.1.7_infectedAll_fwd_peak_157b	TRNAF-GAA	17.63	4.65821	4.05355	exon	B.1.1.7
peaks_nodup_uniq_B.1.1.7_infectedAll_fwd_peak_158	LOC103235005	3.24	3.99876	2.33598	intergenic	B.1.1.7
peaks_nodup_uniq_B.1.1.7_infectedAll_fwd_peak_161	LOC103235346	5.04	5.29645	3.69934	promoter-tss	B.1.1.7
peaks_nodup_uniq_B.1.1.7_infectedAll_fwd_peak_165a	TNKS1BP1	39.58	2.25466	1.98655	exon	B.1.1.7
peaks_nodup_uniq_B.1.1.7_infectedAll_fwd_peak_166	LOC103235530	6.12	4.44845	1.68133	intergenic	B.1.1.7
peaks_nodup_uniq_B.1.1.7_infectedAll_fwd_peak_167	APLNR	6.84	5.59802	2.58003	exon	B.1.1.7
peaks_nodup_uniq_B.1.1.7_infectedAll_fwd_peak_168c	APLNR	9	4.99818	2.0394	intergenic	B.1.1.7
peaks_nodup_uniq_B.1.1.7_infectedAll_fwd_peak_174	KBTBD4	3.24	3.85335	1.63547	promoter-tss	B.1.1.7
peaks_nodup_uniq_B.1.1.7_infectedAll_fwd_peak_175	PTPMT1	5.04	4.31283	1.6213	promoter-tss	B.1.1.7
peaks_nodup_uniq_B.1.1.7_infectedAll_fwd_peak_185	HARBI1	3.96	4.72935	2.58003	exon	B.1.1.7
peaks_nodup_uniq_B.1.1.7_infectedAll_fwd_peak_191	LOC103236590	7.2	4.6051	1.92365	promoter-tss	B.1.1.7
peaks_nodup_uniq_B.1.1.7_infectedAll_fwd_peak_192	LOC103236590	24.83	5.38124	7.17619	tts	B.1.1.7
peaks_nodup_uniq_B.1.1.7_infectedAll_fwd_peak_194c	TP53I11	6.12	5.31158	2.93336	intron	B.1.1.7
peaks_nodup_uniq_B.1.1.7_infectedAll_fwd_peak_194d	TP53I11	6.48	4.67336	1.68133	intron	B.1.1.7
peaks_nodup_uniq_B.1.1.7_infectedAll_fwd_peak_198	TRAF6	12.24	4.41168	2.59236	exon	B.1.1.7
peaks_nodup_uniq_B.1.1.7_infectedAll_fwd_peak_210	PAX6	10.8	3.93187	1.35958	exon	B.1.1.7
peaks_nodup_uniq_B.1.1.7_infectedAll_fwd_peak_211	DNAJC24	3.6	4.38612	2.58003	intron	B.1.1.7
peaks_nodup_uniq_B.1.1.7_infectedAll_fwd_peak_216a	BDNF	19.79	4.15839	3.67066	exon	B.1.1.7
peaks_nodup_uniq_B.1.1.7_infectedAll_fwd_peak_216b	BDNF	12.95	4.10434	1.95351	exon	B.1.1.7
peaks_nodup_uniq_B.1.1.7_infectedAll_fwd_peak_217	CCDC34	19.43	10.2161	12.7681	intron	B.1.1.7
peaks_nodup_uniq_B.1.1.7_infectedAll_fwd_peak_227	LOC103239114	6.84	5.59802	2.58003	intron	B.1.1.7
peaks_nodup_uniq_B.1.1.7_infectedAll_fwd_peak_229	LOC103239243	15.11	3.22277	1.56291	exon	B.1.1.7
peaks_nodup_uniq_B.1.1.7_infectedAll_fwd_peak_230	SAA4	5.04	5.48905	4.39338	exon	B.1.1.7
peaks_nodup_uniq_B.1.1.7_infectedAll_fwd_peak_234	LOC103239280	4.68	4.73175	1.81209	intergenic	B.1.1.7
peaks_nodup_uniq_B.1.1.7_infectedAll_fwd_peak_242a	KCNJ11	5.4	4.56987	1.6213	promoter-tss	B.1.1.7
peaks_nodup_uniq_B.1.1.7_infectedAll_fwd_peak_245	LOC103239605	12.95	4.98384	3.00211	exon	B.1.1.7
peaks_nodup_uniq_B.1.1.7_infectedAll_fwd_peak_248	SOX6	3.96	4.72935	2.58003	intron	B.1.1.7
peaks_nodup_uniq_B.1.1.7_infectedAll_fwd_peak_254	RRAS2	4.32	4.43187	1.81209	intron	B.1.1.7
peaks_nodup_uniq_B.1.1.7_infectedAll_fwd_peak_265	LOC103240549	5.4	5.33151	2.93336	intron	B.1.1.7
peaks_nodup_uniq_B.1.1.7_infectedAll_fwd_peak_272	ARFIP2	5.04	4.13559	1.34633	promoter-tss	B.1.1.7
peaks_nodup_uniq_B.1.1.7_infectedAll_fwd_peak_274	APBB1	7.56	7.13078	5.50858	exon	B.1.1.7
peaks_nodup_uniq_B.1.1.7_infectedAll_fwd_peak_277	TRIM5	6.48	6.23114	4.19231	intron	B.1.1.7
peaks_nodup_uniq_B.1.1.7_infectedAll_fwd_peak_282	TRIM68	5.4	4.56987	1.6213	exon	B.1.1.7
peaks_nodup_uniq_B.1.1.7_infectedAll_fwd_peak_284	LOC103247969	3.96	4.72935	2.58003	intergenic	B.1.1.7
peaks_nodup_uniq_B.1.1.7_infectedAll_fwd_peak_286	RRM1	3.6	4.38612	2.58003	intron	B.1.1.7
peaks_nodup_uniq_B.1.1.7_infectedAll_fwd_peak_292	PHOX2A	4.68	5.3567	3.85335	promoter-tss	B.1.1.7
peaks_nodup_uniq_B.1.1.7_infectedAll_fwd_peak_298	ARHGEF17	4.32	4.28891	1.52758	intron	B.1.1.7
peaks_nodup_uniq_B.1.1.7_infectedAll_fwd_peak_301	LOC103248021	3.24	3.99876	2.33598	intron	B.1.1.7
peaks_nodup_uniq_B.1.1.7_infectedAll_fwd_peak_315	MAP6	10.8	4.91484	2.57409	intron	B.1.1.7
peaks_nodup_uniq_B.1.1.7_infectedAll_fwd_peak_316	MOGAT2	10.44	3.81192	1.35958	intron	B.1.1.7
peaks_nodup_uniq_B.1.1.7_infectedAll_fwd_peak_319	WNT11	4.68	5.2575	3.35158	intron	B.1.1.7
peaks_nodup_uniq_B.1.1.7_infectedAll_fwd_peak_320c	WNT11	19.07	3.34538	2.49704	exon	B.1.1.7
peaks_nodup_uniq_B.1.1.7_infectedAll_fwd_peak_321	WNT11	5.04	4.31283	1.6213	intergenic	B.1.1.7
peaks_nodup_uniq_B.1.1.7_infectedAll_fwd_peak_326	LRRC32	3.24	4.04289	2.58003	intron	B.1.1.7
peaks_nodup_uniq_B.1.1.7_infectedAll_fwd_peak_329	ACER3	9	5.55353	2.64348	intergenic	B.1.1.7
peaks_nodup_uniq_B.1.1.7_infectedAll_fwd_peak_336	USP35	27.35	7.08723	11.5135	exon	B.1.1.7
peaks_nodup_uniq_B.1.1.7_infectedAll_fwd_peak_343	LOC103248152	15.11	5.37129	4.72188	tts	B.1.1.7
peaks_nodup_uniq_B.1.1.7_infectedAll_fwd_peak_350	CHORDC1	12.59	6.79745	5.49908	intergenic	B.1.1.7
peaks_nodup_uniq_B.1.1.7_infectedAll_fwd_peak_360	LOC103248247	3.24	4.04289	2.58003	intergenic	B.1.1.7
peaks_nodup_uniq_B.1.1.7_infectedAll_fwd_peak_361	FOLR4	3.6	4.25791	1.93848	intergenic	B.1.1.7
peaks_nodup_uniq_B.1.1.7_infectedAll_fwd_peak_368	LOC103248256	24.83	2.58299	1.3566	exon	B.1.1.7
peaks_nodup_uniq_B.1.1.7_infectedAll_fwd_peak_369	LOC103248256	11.16	4.05183	1.98927	intron	B.1.1.7
peaks_nodup_uniq_B.1.1.7_infectedAll_fwd_peak_370	LOC103248928	27.35	2.83489	2.54711	exon	B.1.1.7
peaks_nodup_uniq_B.1.1.7_infectedAll_fwd_peak_371	LOC103248271	12.24	4.41168	2.59236	intergenic	B.1.1.7
peaks_nodup_uniq_B.1.1.7_infectedAll_fwd_peak_373	MTMR2	9	4.99818	2.0394	intron	B.1.1.7
peaks_nodup_uniq_B.1.1.7_infectedAll_fwd_peak_374b	LOC103248286	3.6	4.38612	2.58003	intron	B.1.1.7
peaks_nodup_uniq_B.1.1.7_infectedAll_fwd_peak_378a	JRKL	6.12	5.64883	3.6129	exon	B.1.1.7
peaks_nodup_uniq_B.1.1.7_infectedAll_fwd_peak_386	LOC103248379	5.76	5.63139	2.93336	intron	B.1.1.7
peaks_nodup_uniq_B.1.1.7_infectedAll_fwd_peak_391	DDX10	29.15	3.01482	3.32384	exon	B.1.1.7
peaks_nodup_uniq_B.1.1.7_infectedAll_fwd_peak_392	LOC103248409	11.16	10.1296	11.3423	intron	B.1.1.7
peaks_nodup_uniq_B.1.1.7_infectedAll_fwd_peak_393	ZC3H12C	8.28	4.63832	2.0394	exon	B.1.1.7
peaks_nodup_uniq_B.1.1.7_infectedAll_fwd_peak_402a	PLET1	5.04	5.75904	5.86522	intron	B.1.1.7
peaks_nodup_uniq_B.1.1.7_infectedAll_fwd_peak_402b	PLET1	4.68	5.41581	4.19231	intron	B.1.1.7
peaks_nodup_uniq_B.1.1.7_infectedAll_fwd_peak_402c	PLET1	9	4.99818	2.0394	intron	B.1.1.7
peaks_nodup_uniq_B.1.1.7_infectedAll_fwd_peak_403	LOC103248471	3.24	4.04289	2.58003	intergenic	B.1.1.7
peaks_nodup_uniq_B.1.1.7_infectedAll_fwd_peak_406	NCAM1	15.47	4.11843	2.78861	intron	B.1.1.7
peaks_nodup_uniq_B.1.1.7_infectedAll_fwd_peak_417	RNF214	19.79	2.97028	1.54487	intron	B.1.1.7
peaks_nodup_uniq_B.1.1.7_infectedAll_fwd_peak_419	ATP5L	11.88	4.29173	1.98927	exon	B.1.1.7
peaks_nodup_uniq_B.1.1.7_infectedAll_fwd_peak_422	CXCR5	9.72	5.95337	3.56402	intergenic	B.1.1.7
peaks_nodup_uniq_B.1.1.7_infectedAll_fwd_peak_447	SLC37A2	5.04	5.03163	2.93336	promoter-tss	B.1.1.7
peaks_nodup_uniq_B.1.1.7_infectedAll_fwd_peak_458	OPCML	5.4	6.10227	5.86522	intron	B.1.1.7
peaks_nodup_uniq_B.1.1.7_infectedAll_fwd_peak_459a	LOC103248871	6.12	6.78874	7.66185	intron	B.1.1.7
peaks_nodup_uniq_B.1.1.7_infectedAll_fwd_peak_462	GLB1L3	6.84	5.59802	2.58003	promoter-tss	B.1.1.7
peaks_nodup_uniq_B.1.1.7_infectedAll_fwd_peak_464	LOC103248906	4.32	5.07258	4.19231	intergenic	B.1.1.7
peaks_nodup_uniq_B.1.1.7_infectedAll_fwd_peak_471	LOC103216860	3.96	4.72935	2.58003	intergenic	B.1.1.7
peaks_nodup_uniq_B.1.1.7_infectedAll_fwd_peak_473a	HS6ST1	10.44	5.71788	3.67066	exon	B.1.1.7
peaks_nodup_uniq_B.1.1.7_infectedAll_fwd_peak_473b	HS6ST1	12.59	5.66454	4.05918	exon	B.1.1.7
peaks_nodup_uniq_B.1.1.7_infectedAll_fwd_peak_474	SAP130	8.28	4.63832	2.0394	exon	B.1.1.7
peaks_nodup_uniq_B.1.1.7_infectedAll_fwd_peak_478	POLR2D	14.75	3.42479	1.49176	exon	B.1.1.7
peaks_nodup_uniq_B.1.1.7_infectedAll_fwd_peak_482	LOC103217007	12.24	6.61752	5.49908	exon	B.1.1.7
peaks_nodup_uniq_B.1.1.7_infectedAll_fwd_peak_483	SFT2D3	9.36	4.75055	2.35185	exon	B.1.1.7
peaks_nodup_uniq_B.1.1.7_infectedAll_fwd_peak_484	SFT2D3	14.03	3.75858	2.24757	exon	B.1.1.7
peaks_nodup_uniq_B.1.1.7_infectedAll_fwd_peak_488	IWS1	21.59	2.82391	1.59192	exon	B.1.1.7
peaks_nodup_uniq_B.1.1.7_infectedAll_fwd_peak_494	BIN1	5.4	5.07763	2.49704	intron	B.1.1.7
peaks_nodup_uniq_B.1.1.7_infectedAll_fwd_peak_497	NIFK	11.52	5.21472	3.26257	exon	B.1.1.7
peaks_nodup_uniq_B.1.1.7_infectedAll_fwd_peak_508b	LOC103216922	10.8	3.93187	1.35958	intron	B.1.1.7
peaks_nodup_uniq_B.1.1.7_infectedAll_fwd_peak_511	CCDC93	3.6	4.10584	1.37593	intron	B.1.1.7
peaks_nodup_uniq_B.1.1.7_infectedAll_fwd_peak_519	MGAT5	3.6	4.33825	2.33598	intron	B.1.1.7
peaks_nodup_uniq_B.1.1.7_infectedAll_fwd_peak_521	CCNT2	6.12	5.93127	4.19231	intron	B.1.1.7
peaks_nodup_uniq_B.1.1.7_infectedAll_fwd_peak_522b	CCNT2	21.95	3.27873	2.44737	exon	B.1.1.7
peaks_nodup_uniq_B.1.1.7_infectedAll_fwd_peak_523	CCNT2	13.31	5.50562	4.24027	exon	B.1.1.7
peaks_nodup_uniq_B.1.1.7_infectedAll_fwd_peak_524	RAB3GAP1	15.83	3.82581	2.27012	exon	B.1.1.7
peaks_nodup_uniq_B.1.1.7_infectedAll_fwd_peak_533	SPOPL	4.68	5.3567	3.85335	exon	B.1.1.7
peaks_nodup_uniq_B.1.1.7_infectedAll_fwd_peak_538	GTDC1	5.4	6.10227	5.86522	exon	B.1.1.7
peaks_nodup_uniq_B.1.1.7_infectedAll_fwd_peak_540	ORC4	14.03	7.51715	7.38961	exon	B.1.1.7
peaks_nodup_uniq_B.1.1.7_infectedAll_fwd_peak_544a	MBD5	13.67	4.89148	3.30073	exon	B.1.1.7
peaks_nodup_uniq_B.1.1.7_infectedAll_fwd_peak_544b	MBD5	10.44	5.19808	3.00263	exon	B.1.1.7
peaks_nodup_uniq_B.1.1.7_infectedAll_fwd_peak_548	EPC2	3.96	4.72935	2.58003	intergenic	B.1.1.7
peaks_nodup_uniq_B.1.1.7_infectedAll_fwd_peak_550	RIF1	21.95	2.86889	1.59192	exon	B.1.1.7
peaks_nodup_uniq_B.1.1.7_infectedAll_fwd_peak_554	PRPF40A	13.31	4.77153	3.30073	promoter-tss	B.1.1.7
peaks_nodup_uniq_B.1.1.7_infectedAll_fwd_peak_563	BAZ2B	4.32	4.43187	1.81209	exon	B.1.1.7
peaks_nodup_uniq_B.1.1.7_infectedAll_fwd_peak_564	BAZ2B	6.84	6.12283	3.42402	intergenic	B.1.1.7
peaks_nodup_uniq_B.1.1.7_infectedAll_fwd_peak_565	LOC103217164	6.12	6.47047	5.86522	intron	B.1.1.7
peaks_nodup_uniq_B.1.1.7_infectedAll_fwd_peak_567	LOC103218293	9	7.14025	4.71345	intron	B.1.1.7
peaks_nodup_uniq_B.1.1.7_infectedAll_fwd_peak_574	LOC103217177	4.68	4.98079	2.44001	intron	B.1.1.7
peaks_nodup_uniq_B.1.1.7_infectedAll_fwd_peak_579	LOC103217222	11.16	4.05183	1.98927	exon	B.1.1.7
peaks_nodup_uniq_B.1.1.7_infectedAll_fwd_peak_580	CERS6	6.84	6.53102	4.19231	intergenic	B.1.1.7
peaks_nodup_uniq_B.1.1.7_infectedAll_fwd_peak_581	LOC103217274	14.75	3.9385	2.24757	intron	B.1.1.7
peaks_nodup_uniq_B.1.1.7_infectedAll_fwd_peak_582a	LOC103217274	38.5	3.7985	7.22175	exon	B.1.1.7
peaks_nodup_uniq_B.1.1.7_infectedAll_fwd_peak_582b	LOC103217274	37.78	3.23206	5.13404	exon	B.1.1.7
peaks_nodup_uniq_B.1.1.7_infectedAll_fwd_peak_585	PHOSPHO2	5.04	4.31283	1.6213	exon	B.1.1.7
peaks_nodup_uniq_B.1.1.7_infectedAll_fwd_peak_590	LOC103217282	11.88	6.43759	4.53418	intergenic	B.1.1.7
peaks_nodup_uniq_B.1.1.7_infectedAll_fwd_peak_591	MYO3B	3.24	4.04289	2.58003	intron	B.1.1.7
peaks_nodup_uniq_B.1.1.7_infectedAll_fwd_peak_608	HOXD8	6.12	5.08394	2.58003	exon	B.1.1.7
peaks_nodup_uniq_B.1.1.7_infectedAll_fwd_peak_609	HOXD8	9.72	5.35803	2.81639	exon	B.1.1.7
peaks_nodup_uniq_B.1.1.7_infectedAll_fwd_peak_628	LOC103217464	7.56	4.75385	1.84458	exon	B.1.1.7
peaks_nodup_uniq_B.1.1.7_infectedAll_fwd_peak_629	LOC103217464	3.6	4.25791	1.93848	intergenic	B.1.1.7
peaks_nodup_uniq_B.1.1.7_infectedAll_fwd_peak_630	NCKAP1	3.24	4.04289	2.58003	intergenic	B.1.1.7
peaks_nodup_uniq_B.1.1.7_infectedAll_fwd_peak_633	FAM171B	13.67	3.49392	1.4237	exon	B.1.1.7
peaks_nodup_uniq_B.1.1.7_infectedAll_fwd_peak_634	FAM171B	21.23	3.17591	2.44737	exon	B.1.1.7
peaks_nodup_uniq_B.1.1.7_infectedAll_fwd_peak_637	GULP1	17.63	8.46948	9.391	intron	B.1.1.7
peaks_nodup_uniq_B.1.1.7_infectedAll_fwd_peak_642	LOC103217512	9	4.99818	2.0394	exon	B.1.1.7
peaks_nodup_uniq_B.1.1.7_infectedAll_fwd_peak_652	MARS2	5.04	4.31283	1.6213	intron	B.1.1.7
peaks_nodup_uniq_B.1.1.7_infectedAll_fwd_peak_654	PLCL1	10.08	5.53796	3.67066	intron	B.1.1.7
peaks_nodup_uniq_B.1.1.7_infectedAll_fwd_peak_662	LOC103217612	11.16	6.07774	4.53418	exon	B.1.1.7
peaks_nodup_uniq_B.1.1.7_infectedAll_fwd_peak_669a	LOC103217636	8.28	4.63832	2.0394	exon	B.1.1.7
peaks_nodup_uniq_B.1.1.7_infectedAll_fwd_peak_671	FZD7	9.72	5.35803	2.81639	exon	B.1.1.7
peaks_nodup_uniq_B.1.1.7_infectedAll_fwd_peak_674a	ICA1L	6.12	6.35493	5.49908	exon	B.1.1.7
peaks_nodup_uniq_B.1.1.7_infectedAll_fwd_peak_674b	ICA1L	4.32	4.66513	2.44001	exon	B.1.1.7
peaks_nodup_uniq_B.1.1.7_infectedAll_fwd_peak_677	LOC103217693	6.12	6.78874	7.66185	intron	B.1.1.7
peaks_nodup_uniq_B.1.1.7_infectedAll_fwd_peak_682	FASTKD2	5.76	5.63139	2.93336	intergenic	B.1.1.7
peaks_nodup_uniq_B.1.1.7_infectedAll_fwd_peak_685	LOC103217715	3.24	4.04289	2.58003	intergenic	B.1.1.7
peaks_nodup_uniq_B.1.1.7_infectedAll_fwd_peak_711	ANKZF1	14.39	5.13139	4.02919	exon	B.1.1.7
peaks_nodup_uniq_B.1.1.7_infectedAll_fwd_peak_712	PTPRN	8.64	7.52851	5.84555	intron	B.1.1.7
peaks_nodup_uniq_B.1.1.7_infectedAll_fwd_peak_717	STK11IP	17.63	9.31642	10.5009	exon	B.1.1.7
peaks_nodup_uniq_B.1.1.7_infectedAll_fwd_peak_718	SLC4A3	11.88	4.29173	1.98927	exon	B.1.1.7
peaks_nodup_uniq_B.1.1.7_infectedAll_fwd_peak_721	MRPL44	8.64	4.81825	2.0394	exon	B.1.1.7
peaks_nodup_uniq_B.1.1.7_infectedAll_fwd_peak_724	DOCK10	6.48	5.34098	2.58003	intron	B.1.1.7
peaks_nodup_uniq_B.1.1.7_infectedAll_fwd_peak_725	DOCK10	4.32	5.01722	3.85335	intron	B.1.1.7
peaks_nodup_uniq_B.1.1.7_infectedAll_fwd_peak_728	IRS1	10.44	5.71788	3.67066	intergenic	B.1.1.7
peaks_nodup_uniq_B.1.1.7_infectedAll_fwd_peak_734	C10H2orf83	4.32	4.50699	1.99024	intergenic	B.1.1.7
peaks_nodup_uniq_B.1.1.7_infectedAll_fwd_peak_745	LOC103218039	8.28	4.63832	2.0394	exon	B.1.1.7
peaks_nodup_uniq_B.1.1.7_infectedAll_fwd_peak_750b	LOC103218039	5.04	4.31283	1.6213	intergenic	B.1.1.7
peaks_nodup_uniq_B.1.1.7_infectedAll_fwd_peak_751	CAB39	13.67	3.66861	1.67778	intron	B.1.1.7
peaks_nodup_uniq_B.1.1.7_infectedAll_fwd_peak_753	CAB39	3.24	3.85335	1.63547	intron	B.1.1.7
peaks_nodup_uniq_B.1.1.7_infectedAll_fwd_peak_766	EFHD1	3.6	4.33825	2.33598	intergenic	B.1.1.7
peaks_nodup_uniq_B.1.1.7_infectedAll_fwd_peak_775a	ARL4C	10.08	3.95568	1.70112	intergenic	B.1.1.7
peaks_nodup_uniq_B.1.1.7_infectedAll_fwd_peak_775b	ARL4C	8.28	4.63832	2.0394	intergenic	B.1.1.7
peaks_nodup_uniq_B.1.1.7_infectedAll_fwd_peak_778	LOC103218132	21.95	3.37516	2.58003	exon	B.1.1.7
peaks_nodup_uniq_B.1.1.7_infectedAll_fwd_peak_784	LOC103218336	8.28	4.21666	1.56291	exon	B.1.1.7
peaks_nodup_uniq_B.1.1.7_infectedAll_fwd_peak_785	ACKR3	3.24	4.04289	2.58003	intergenic	B.1.1.7
peaks_nodup_uniq_B.1.1.7_infectedAll_fwd_peak_789	RBM44	26.27	2.72693	2.10194	exon	B.1.1.7
peaks_nodup_uniq_B.1.1.7_infectedAll_fwd_peak_801	TRAF3IP1	28.43	5.88569	9.57378	exon	B.1.1.7
peaks_nodup_uniq_B.1.1.7_infectedAll_fwd_peak_820b	BOK	11.52	7.82208	6.58061	intergenic	B.1.1.7
peaks_nodup_uniq_B.1.1.7_infectedAll_fwd_peak_823a	RTP5	12.24	6.61752	5.49908	intergenic	B.1.1.7
peaks_nodup_uniq_B.1.1.7_infectedAll_fwd_peak_823b	RTP5	10.08	5.53796	3.67066	intergenic	B.1.1.7
peaks_nodup_uniq_B.1.1.7_infectedAll_fwd_peak_823c	RTP5	12.24	6.61752	5.49908	intergenic	B.1.1.7
peaks_nodup_uniq_B.1.1.7_infectedAll_fwd_peak_823d	RTP5	13.31	4.77153	3.30073	intergenic	B.1.1.7
peaks_nodup_uniq_B.1.1.7_infectedAll_fwd_peak_828	LOC103218366	13.67	4.89148	3.30073	exon	B.1.1.7
peaks_nodup_uniq_B.1.1.7_infectedAll_fwd_peak_830	LOC103218372	8.28	8.84812	11.5135	intergenic	B.1.1.7
peaks_nodup_uniq_B.1.1.7_infectedAll_fwd_peak_838	FGF23	4.32	4.83477	2.93336	intergenic	B.1.1.7
peaks_nodup_uniq_B.1.1.7_infectedAll_fwd_peak_845	LOC103218462	6.84	4.89827	1.68133	intron	B.1.1.7
peaks_nodup_uniq_B.1.1.7_infectedAll_fwd_peak_846a	LOC103218462	8.28	6.10306	3.95697	intron	B.1.1.7
peaks_nodup_uniq_B.1.1.7_infectedAll_fwd_peak_846b	LOC103218462	6.84	4.89827	1.68133	intron	B.1.1.7
peaks_nodup_uniq_B.1.1.7_infectedAll_fwd_peak_848	PIANP	4.32	4.50699	1.99024	exon	B.1.1.7
peaks_nodup_uniq_B.1.1.7_infectedAll_fwd_peak_849	PIANP	4.68	4.73175	1.81209	intron	B.1.1.7
peaks_nodup_uniq_B.1.1.7_infectedAll_fwd_peak_855	LRRC23	3.96	4.72935	2.58003	intron	B.1.1.7
peaks_nodup_uniq_B.1.1.7_infectedAll_fwd_peak_862	C3AR1	3.96	4.72935	2.58003	intergenic	B.1.1.7
peaks_nodup_uniq_B.1.1.7_infectedAll_fwd_peak_867	GABARAPL1	14.39	5.49792	4.49827	exon	B.1.1.7
peaks_nodup_uniq_B.1.1.7_infectedAll_fwd_peak_873	LOC103218623	4.32	4.22083	1.37499	intergenic	B.1.1.7
peaks_nodup_uniq_B.1.1.7_infectedAll_fwd_peak_876	LOC103218631	10.8	8.42544	7.0545	exon	B.1.1.7
peaks_nodup_uniq_B.1.1.7_infectedAll_fwd_peak_884	DDX47	3.6	4.10584	1.37593	exon	B.1.1.7
peaks_nodup_uniq_B.1.1.7_infectedAll_fwd_peak_885	DDX47	14.39	5.13139	4.02919	intron	B.1.1.7
peaks_nodup_uniq_B.1.1.7_infectedAll_fwd_peak_888a	GPRC5D	18.35	3.22543	1.98915	exon	B.1.1.7
peaks_nodup_uniq_B.1.1.7_infectedAll_fwd_peak_896	LOC103218698	6.48	7.05413	7.17619	intron	B.1.1.7
peaks_nodup_uniq_B.1.1.7_infectedAll_fwd_peak_901	LOC103218716	10.44	9.52981	9.73643	exon	B.1.1.7
peaks_nodup_uniq_B.1.1.7_infectedAll_fwd_peak_903	LOC103218721	8.64	4.81825	2.0394	intron	B.1.1.7
peaks_nodup_uniq_B.1.1.7_infectedAll_fwd_peak_904	LOC103218719	3.6	4.33825	2.33598	intergenic	B.1.1.7
peaks_nodup_uniq_B.1.1.7_infectedAll_fwd_peak_915a	SSPN	28.79	2.48236	1.57837	exon	B.1.1.7
peaks_nodup_uniq_B.1.1.7_infectedAll_fwd_peak_915b	SSPN	43.18	2.00829	1.37593	exon	B.1.1.7
peaks_nodup_uniq_B.1.1.7_infectedAll_fwd_peak_918	TM7SF3	3.24	4.04289	2.58003	promoter-tss	B.1.1.7
peaks_nodup_uniq_B.1.1.7_infectedAll_fwd_peak_922	ARNTL2	8.28	4.63832	2.0394	intron	B.1.1.7
peaks_nodup_uniq_B.1.1.7_infectedAll_fwd_peak_928	REP15	6.84	6.53102	4.19231	intron	B.1.1.7
peaks_nodup_uniq_B.1.1.7_infectedAll_fwd_peak_939	DNM1L	3.24	3.99876	2.33598	intron	B.1.1.7
peaks_nodup_uniq_B.1.1.7_infectedAll_fwd_peak_940	DNM1L	3.6	4.38612	2.58003	intron	B.1.1.7
peaks_nodup_uniq_B.1.1.7_infectedAll_fwd_peak_957	ANO6	5.04	5.75904	5.86522	intron	B.1.1.7
peaks_nodup_uniq_B.1.1.7_infectedAll_fwd_peak_967	LOC103239483	3.6	4.38612	2.58003	promoter-tss	B.1.1.7
peaks_nodup_uniq_B.1.1.7_infectedAll_fwd_peak_975	TROAP	15.11	8.05694	8.3467	intergenic	B.1.1.7
peaks_nodup_uniq_B.1.1.7_infectedAll_fwd_peak_976	C1QL4	10.08	9.22993	9.73643	exon	B.1.1.7
peaks_nodup_uniq_B.1.1.7_infectedAll_fwd_peak_989	LOC103238345	5.04	5.69619	5.49908	intergenic	B.1.1.7
peaks_nodup_uniq_B.1.1.7_infectedAll_fwd_peak_996	CSAD	7.92	6.36914	3.643	exon	B.1.1.7
peaks_nodup_uniq_B.1.1.7_infectedAll_fwd_peak_997	RARG	6.84	6.75623	4.7336	intron	B.1.1.7
peaks_nodup_uniq_B.1.1.7_infectedAll_fwd_peak_1004	ATP5G2	3.24	3.99876	2.33598	intergenic	B.1.1.7
peaks_nodup_uniq_B.1.1.7_infectedAll_fwd_peak_1008	LOC103238417	18.35	3.22543	1.98915	exon	B.1.1.7
peaks_nodup_uniq_B.1.1.7_infectedAll_fwd_peak_1009	HOXC9	16.19	3.43869	2.0394	exon	B.1.1.7
peaks_nodup_uniq_B.1.1.7_infectedAll_fwd_peak_1013	LOC103238421	9.72	5.35803	2.81639	exon	B.1.1.7
peaks_nodup_uniq_B.1.1.7_infectedAll_fwd_peak_1015	LOC103238428	21.23	3.70523	3.47764	intergenic	B.1.1.7
peaks_nodup_uniq_B.1.1.7_infectedAll_fwd_peak_1019	NFE2	6.12	5.93127	4.19231	intergenic	B.1.1.7
peaks_nodup_uniq_B.1.1.7_infectedAll_fwd_peak_1023	LOC103238484	20.87	4.37431	4.23038	exon	B.1.1.7
peaks_nodup_uniq_B.1.1.7_infectedAll_fwd_peak_1024	GDF11	17.63	7.76369	8.3629	exon	B.1.1.7
peaks_nodup_uniq_B.1.1.7_infectedAll_fwd_peak_1026	MMP19	3.24	3.78454	1.37593	intron	B.1.1.7
peaks_nodup_uniq_B.1.1.7_infectedAll_fwd_peak_1029	IKZF4	7.2	5.32278	2.81718	intron	B.1.1.7
peaks_nodup_uniq_B.1.1.7_infectedAll_fwd_peak_1030	MYL6	17.63	3.72657	2.58003	tts	B.1.1.7
peaks_nodup_uniq_B.1.1.7_infectedAll_fwd_peak_1041	TSFM	9.36	8.63017	8.27401	tts	B.1.1.7
peaks_nodup_uniq_B.1.1.7_infectedAll_fwd_peak_1048	LOC103239503	3.6	4.38612	2.58003	intron	B.1.1.7
peaks_nodup_uniq_B.1.1.7_infectedAll_fwd_peak_1051	C11H12orf61	3.24	3.78454	1.37593	exon	B.1.1.7
peaks_nodup_uniq_B.1.1.7_infectedAll_fwd_peak_1053	LOC103238628	6.12	6.47047	5.86522	exon	B.1.1.7
peaks_nodup_uniq_B.1.1.7_infectedAll_fwd_peak_1056	C11H12orf66	6.84	4.89827	1.68133	intron	B.1.1.7
peaks_nodup_uniq_B.1.1.7_infectedAll_fwd_peak_1061	LEMD3	15.83	4.2084	2.78861	exon	B.1.1.7
peaks_nodup_uniq_B.1.1.7_infectedAll_fwd_peak_1065	HMGA2	10.8	3.93187	1.35958	intron	B.1.1.7
peaks_nodup_uniq_B.1.1.7_infectedAll_fwd_peak_1068	HELB	7.92	4.95377	1.84458	exon	B.1.1.7
peaks_nodup_uniq_B.1.1.7_infectedAll_fwd_peak_1073	CAND1	3.6	4.18049	1.63547	intergenic	B.1.1.7
peaks_nodup_uniq_B.1.1.7_infectedAll_fwd_peak_1074	LOC103238667	3.6	4.38612	2.58003	intergenic	B.1.1.7
peaks_nodup_uniq_B.1.1.7_infectedAll_fwd_peak_1076	DYRK2	16.19	4.29836	3.4124	exon	B.1.1.7
peaks_nodup_uniq_B.1.1.7_infectedAll_fwd_peak_1078	DYRK2	8.28	4.21666	1.56291	exon	B.1.1.7
peaks_nodup_uniq_B.1.1.7_infectedAll_fwd_peak_1080	LOC103238689	34.19	2.34574	1.92535	exon	B.1.1.7
peaks_nodup_uniq_B.1.1.7_infectedAll_fwd_peak_1081	LOC103238689	41.02	2.21176	2.09934	exon	B.1.1.7
peaks_nodup_uniq_B.1.1.7_infectedAll_fwd_peak_1090b	CCT2	16.55	3.51066	2.0394	exon	B.1.1.7
peaks_nodup_uniq_B.1.1.7_infectedAll_fwd_peak_1093	CNOT2	5.4	5.71233	4.03927	intron	B.1.1.7
peaks_nodup_uniq_B.1.1.7_infectedAll_fwd_peak_1096	PTPRR	5.76	5.63139	2.93336	intron	B.1.1.7
peaks_nodup_uniq_B.1.1.7_infectedAll_fwd_peak_1099	TMEM19	7.56	6.1121	3.643	exon	B.1.1.7
peaks_nodup_uniq_B.1.1.7_infectedAll_fwd_peak_1103	ATXN7L3B	9	4.99818	2.0394	exon	B.1.1.7
peaks_nodup_uniq_B.1.1.7_infectedAll_fwd_peak_1105	BBS10	3.24	3.85335	1.63547	intergenic	B.1.1.7
peaks_nodup_uniq_B.1.1.7_infectedAll_fwd_peak_1121	LRRIQ1	8.64	4.81825	2.0394	exon	B.1.1.7
peaks_nodup_uniq_B.1.1.7_infectedAll_fwd_peak_1122	ALX1	3.6	4.38612	2.58003	exon	B.1.1.7
peaks_nodup_uniq_B.1.1.7_infectedAll_fwd_peak_1123a	TMTC3	7.2	5.12318	2.58003	exon	B.1.1.7
peaks_nodup_uniq_B.1.1.7_infectedAll_fwd_peak_1123b	TMTC3	16.91	5.97105	5.50858	exon	B.1.1.7
peaks_nodup_uniq_B.1.1.7_infectedAll_fwd_peak_1131	VEZT	17.27	4.15295	3.38684	tts	B.1.1.7
peaks_nodup_uniq_B.1.1.7_infectedAll_fwd_peak_1140	SLC17A8	15.11	8.05694	8.3467	intergenic	B.1.1.7
peaks_nodup_uniq_B.1.1.7_infectedAll_fwd_peak_1154	GLT8D2	11.16	6.07774	4.53418	intron	B.1.1.7
peaks_nodup_uniq_B.1.1.7_infectedAll_fwd_peak_1155	GLT8D2	3.24	3.85335	1.63547	intron	B.1.1.7
peaks_nodup_uniq_B.1.1.7_infectedAll_fwd_peak_1165	KIAA1033	14.39	3.84854	2.24757	exon	B.1.1.7
peaks_nodup_uniq_B.1.1.7_infectedAll_fwd_peak_1166	C11H12orf75	7.2	7.58989	8.10785	intergenic	B.1.1.7
peaks_nodup_uniq_B.1.1.7_infectedAll_fwd_peak_1168	LOC103239015	11.16	10.1296	11.3423	intron	B.1.1.7
peaks_nodup_uniq_B.1.1.7_infectedAll_fwd_peak_1171	LOC103239022	4.68	5.41581	4.19231	intergenic	B.1.1.7
peaks_nodup_uniq_B.1.1.7_infectedAll_fwd_peak_1174	LOC103239026	8.64	4.81825	2.0394	tts	B.1.1.7
peaks_nodup_uniq_B.1.1.7_infectedAll_fwd_peak_1178	RIC8B	5.4	4.56987	1.6213	promoter-tss	B.1.1.7
peaks_nodup_uniq_B.1.1.7_infectedAll_fwd_peak_1188	LOC103239066	4.68	4.73175	1.81209	intergenic	B.1.1.7
peaks_nodup_uniq_B.1.1.7_infectedAll_fwd_peak_1193	ISCU	3.24	3.85335	1.63547	intergenic	B.1.1.7
peaks_nodup_uniq_B.1.1.7_infectedAll_fwd_peak_1199	TRPV4	7.2	5.12318	2.58003	intron	B.1.1.7
peaks_nodup_uniq_B.1.1.7_infectedAll_fwd_peak_1200	TCHP	8.64	7.41269	5.60468	exon	B.1.1.7
peaks_nodup_uniq_B.1.1.7_infectedAll_fwd_peak_1201	IFT81	4.32	5.07258	4.19231	intron	B.1.1.7
peaks_nodup_uniq_B.1.1.7_infectedAll_fwd_peak_1214b	SDS	4.68	4.65418	1.6612	intergenic	B.1.1.7
peaks_nodup_uniq_B.1.1.7_infectedAll_fwd_peak_1219	C11H12orf49	6.12	6.78874	7.66185	promoter-tss	B.1.1.7
peaks_nodup_uniq_B.1.1.7_infectedAll_fwd_peak_1228	LOC103239227	3.24	4.04289	2.58003	intergenic	B.1.1.7
peaks_nodup_uniq_B.1.1.7_infectedAll_fwd_peak_1230	PRKAB1	10.08	3.69197	1.35958	tts	B.1.1.7
peaks_nodup_uniq_B.1.1.7_infectedAll_fwd_peak_1233	LOC103239249	6.48	6.23114	4.19231	intergenic	B.1.1.7
peaks_nodup_uniq_B.1.1.7_infectedAll_fwd_peak_1234	LOC103239249	5.76	4.8269	1.6213	intergenic	B.1.1.7
peaks_nodup_uniq_B.1.1.7_infectedAll_fwd_peak_1236	CABP1	3.96	4.59111	1.93848	intron	B.1.1.7
peaks_nodup_uniq_B.1.1.7_infectedAll_fwd_peak_1246a	SETD1B	9.72	5.35803	2.81639	exon	B.1.1.7
peaks_nodup_uniq_B.1.1.7_infectedAll_fwd_peak_1250	HPD	7.56	5.70462	3.00263	exon	B.1.1.7
peaks_nodup_uniq_B.1.1.7_infectedAll_fwd_peak_1255a	MLXIP	7.2	6.50562	4.78261	intron	B.1.1.7
peaks_nodup_uniq_B.1.1.7_infectedAll_fwd_peak_1255b	MLXIP	10.08	3.69197	1.35958	intron	B.1.1.7
peaks_nodup_uniq_B.1.1.7_infectedAll_fwd_peak_1255c	MLXIP	10.8	3.93187	1.35958	intron	B.1.1.7
peaks_nodup_uniq_B.1.1.7_infectedAll_fwd_peak_1258	CCDC62	11.88	6.43759	4.53418	intron	B.1.1.7
peaks_nodup_uniq_B.1.1.7_infectedAll_fwd_peak_1259	CCDC62	5.04	5.20514	3.43372	intron	B.1.1.7
peaks_nodup_uniq_B.1.1.7_infectedAll_fwd_peak_1264	RILPL2	10.08	3.69197	1.35958	intron	B.1.1.7
peaks_nodup_uniq_B.1.1.7_infectedAll_fwd_peak_1265	SNRNP35	14.39	7.69708	7.38961	exon	B.1.1.7
peaks_nodup_uniq_B.1.1.7_infectedAll_fwd_peak_1266	GTF2H3	19.43	6.81071	7.91228	exon	B.1.1.7
peaks_nodup_uniq_B.1.1.7_infectedAll_fwd_peak_1267	GTF2H3	15.83	5.26049	4.24591	exon	B.1.1.7
peaks_nodup_uniq_B.1.1.7_infectedAll_fwd_peak_1272	LOC103239347	3.24	4.04289	2.58003	intron	B.1.1.7
peaks_nodup_uniq_B.1.1.7_infectedAll_fwd_peak_1274a	LOC103239347	4.68	4.73175	1.81209	intron	B.1.1.7
peaks_nodup_uniq_B.1.1.7_infectedAll_fwd_peak_1275b	LOC103239347	3.24	4.04289	2.58003	intron	B.1.1.7
peaks_nodup_uniq_B.1.1.7_infectedAll_fwd_peak_1275c	LOC103239347	4.68	5.41581	4.19231	intron	B.1.1.7
peaks_nodup_uniq_B.1.1.7_infectedAll_fwd_peak_1277	BRI3BP	17.27	3.0455	1.52758	exon	B.1.1.7
peaks_nodup_uniq_B.1.1.7_infectedAll_fwd_peak_1282	LOC103239358	11.16	4.05183	1.98927	exon	B.1.1.7
peaks_nodup_uniq_B.1.1.7_infectedAll_fwd_peak_1283a	LOC103239358	5.04	4.31283	1.6213	exon	B.1.1.7
peaks_nodup_uniq_B.1.1.7_infectedAll_fwd_peak_1290	LOC103239391	4.32	5.07258	4.19231	tts	B.1.1.7
peaks_nodup_uniq_B.1.1.7_infectedAll_fwd_peak_1293	LOC103239410	3.6	4.38612	2.58003	intron	B.1.1.7
peaks_nodup_uniq_B.1.1.7_infectedAll_fwd_peak_1296	SFSWAP	24.11	4.18504	5.14692	promoter-tss	B.1.1.7
peaks_nodup_uniq_B.1.1.7_infectedAll_fwd_peak_1297	SFSWAP	11.16	4.05183	1.98927	intron	B.1.1.7
peaks_nodup_uniq_B.1.1.7_infectedAll_fwd_peak_1300	LOC103239430	15.11	4.02847	2.78861	exon	B.1.1.7
peaks_nodup_uniq_B.1.1.7_infectedAll_fwd_peak_1301	LOC103239430	8.28	6.62617	4.71345	intron	B.1.1.7
peaks_nodup_uniq_B.1.1.7_infectedAll_fwd_peak_1308a	NOC4L	9.36	5.1781	2.81639	intergenic	B.1.1.7
peaks_nodup_uniq_B.1.1.7_infectedAll_fwd_peak_1308b	NOC4L	5.04	5.03163	2.93336	intergenic	B.1.1.7
peaks_nodup_uniq_B.1.1.7_infectedAll_fwd_peak_1309	GALNT9	4.32	4.50699	1.99024	intron	B.1.1.7
peaks_nodup_uniq_B.1.1.7_infectedAll_fwd_peak_1310	GALNT9	9.72	8.78366	7.93891	intron	B.1.1.7
peaks_nodup_uniq_B.1.1.7_infectedAll_fwd_peak_1314	GALNT9	12.95	6.97737	5.49908	intron	B.1.1.7
peaks_nodup_uniq_B.1.1.7_infectedAll_fwd_peak_1315	LOC103239439	3.24	3.99876	2.33598	exon	B.1.1.7
peaks_nodup_uniq_B.1.1.7_infectedAll_fwd_peak_1316	LOC103239439	3.6	4.38612	2.58003	intron	B.1.1.7
peaks_nodup_uniq_B.1.1.7_infectedAll_fwd_peak_1317	GALNT9	5.76	5.63139	2.93336	intron	B.1.1.7
peaks_nodup_uniq_B.1.1.7_infectedAll_fwd_peak_1320	LOC103239443	5.4	4.56987	1.6213	intergenic	B.1.1.7
peaks_nodup_uniq_B.1.1.7_infectedAll_fwd_peak_1323	LOC103239445	20.15	4.23037	4.23038	intergenic	B.1.1.7
peaks_nodup_uniq_B.1.1.7_infectedAll_fwd_peak_1329	LOC103239448	10.08	3.69197	1.35958	intron	B.1.1.7
peaks_nodup_uniq_B.1.1.7_infectedAll_fwd_peak_1330	LOC103239448	11.52	3.91104	1.6612	exon	B.1.1.7
peaks_nodup_uniq_B.1.1.7_infectedAll_fwd_peak_1331	LOC103239448	15.83	5.61119	4.72188	exon	B.1.1.7
peaks_nodup_uniq_B.1.1.7_infectedAll_fwd_peak_1332	LRCOL1	14.75	3.9385	2.24757	exon	B.1.1.7
peaks_nodup_uniq_B.1.1.7_infectedAll_fwd_peak_1340	ZNF26	5.04	4.31283	1.6213	exon	B.1.1.7
peaks_nodup_uniq_B.1.1.7_infectedAll_fwd_peak_1342	ZNF26	12.24	8.2719	7.66185	exon	B.1.1.7
peaks_nodup_uniq_B.1.1.7_infectedAll_fwd_peak_1344	ZNF84	10.44	3.81192	1.35958	exon	B.1.1.7
peaks_nodup_uniq_B.1.1.7_infectedAll_fwd_peak_1349	ZNF10	5.04	4.31283	1.6213	exon	B.1.1.7
peaks_nodup_uniq_B.1.1.7_infectedAll_fwd_peak_1355	DPH7	5.76	5.63139	2.93336	exon	B.1.1.7
peaks_nodup_uniq_B.1.1.7_infectedAll_fwd_peak_1373	SEC16A	16.19	3.9076	2.78861	exon	B.1.1.7
peaks_nodup_uniq_B.1.1.7_infectedAll_fwd_peak_1379	LOC103239641	8.28	4.63832	2.0394	exon	B.1.1.7
peaks_nodup_uniq_B.1.1.7_infectedAll_fwd_peak_1383	CAMSAP1	23.03	3.00383	2.44835	exon	B.1.1.7
peaks_nodup_uniq_B.1.1.7_infectedAll_fwd_peak_1385b	KCNT1	3.6	4.33825	2.33598	intron	B.1.1.7
peaks_nodup_uniq_B.1.1.7_infectedAll_fwd_peak_1391a	LOC103239661	15.83	12.024	13.6493	intron	B.1.1.7
peaks_nodup_uniq_B.1.1.7_infectedAll_fwd_peak_1392a	LOC103239665	3.6	4.33825	2.33598	intergenic	B.1.1.7
peaks_nodup_uniq_B.1.1.7_infectedAll_fwd_peak_1392b	LOC103239665	5.4	6.03567	5.49908	intergenic	B.1.1.7
peaks_nodup_uniq_B.1.1.7_infectedAll_fwd_peak_1403	LOC103239698	3.24	3.85335	1.63547	intergenic	B.1.1.7
peaks_nodup_uniq_B.1.1.7_infectedAll_fwd_peak_1406	BARHL1	3.96	4.67773	2.33598	intergenic	B.1.1.7
peaks_nodup_uniq_B.1.1.7_infectedAll_fwd_peak_1408	LOC103239722	12.59	4.2484	2.29401	exon	B.1.1.7
peaks_nodup_uniq_B.1.1.7_infectedAll_fwd_peak_1410	SETX	18.71	5.47567	5.50858	exon	B.1.1.7
peaks_nodup_uniq_B.1.1.7_infectedAll_fwd_peak_1417	UCK1	18.35	3.22543	1.98915	exon	B.1.1.7
peaks_nodup_uniq_B.1.1.7_infectedAll_fwd_peak_1420	FAM78A	3.24	3.99876	2.33598	intergenic	B.1.1.7
peaks_nodup_uniq_B.1.1.7_infectedAll_fwd_peak_1428	IER5L	17.63	3.72657	2.58003	exon	B.1.1.7
peaks_nodup_uniq_B.1.1.7_infectedAll_fwd_peak_1433	CIZ1	9.36	3.98316	1.41482	intron	B.1.1.7
peaks_nodup_uniq_B.1.1.7_infectedAll_fwd_peak_1436	PIP5KL1	9.36	5.1781	2.81639	intron	B.1.1.7
peaks_nodup_uniq_B.1.1.7_infectedAll_fwd_peak_1446	WDR38	5.4	5.33151	2.93336	intergenic	B.1.1.7
peaks_nodup_uniq_B.1.1.7_infectedAll_fwd_peak_1449	GPR144	5.04	5.69619	5.49908	intron	B.1.1.7
peaks_nodup_uniq_B.1.1.7_infectedAll_fwd_peak_1464	LOC103239905	10.8	3.93187	1.35958	tts	B.1.1.7
peaks_nodup_uniq_B.1.1.7_infectedAll_fwd_peak_1470	RAB14	8.28	5.15369	2.64348	exon	B.1.1.7
peaks_nodup_uniq_B.1.1.7_infectedAll_fwd_peak_1474	PSMD5	11.16	4.05183	1.98927	exon	B.1.1.7
peaks_nodup_uniq_B.1.1.7_infectedAll_fwd_peak_1476	LOC103219851	9.36	5.1781	2.81639	exon	B.1.1.7
peaks_nodup_uniq_B.1.1.7_infectedAll_fwd_peak_1480	CDK5RAP2	8.28	4.63832	2.0394	exon	B.1.1.7
peaks_nodup_uniq_B.1.1.7_infectedAll_fwd_peak_1481	CDK5RAP2	7.2	5.12318	2.58003	exon	B.1.1.7
peaks_nodup_uniq_B.1.1.7_infectedAll_fwd_peak_1483	CDK5RAP2	3.24	4.04289	2.58003	exon	B.1.1.7
peaks_nodup_uniq_B.1.1.7_infectedAll_fwd_peak_1484	CDK5RAP2	3.96	4.72935	2.58003	intergenic	B.1.1.7
peaks_nodup_uniq_B.1.1.7_infectedAll_fwd_peak_1487	BRINP1	3.6	4.38612	2.58003	exon	B.1.1.7
peaks_nodup_uniq_B.1.1.7_infectedAll_fwd_peak_1490	BRINP1	6.48	5.34098	2.58003	exon	B.1.1.7
peaks_nodup_uniq_B.1.1.7_infectedAll_fwd_peak_1499	POLE3	36.35	7.46905	16.1032	intron	B.1.1.7
peaks_nodup_uniq_B.1.1.7_infectedAll_fwd_peak_1501b	SLC31A2	6.84	4.7788	1.56011	exon	B.1.1.7
peaks_nodup_uniq_B.1.1.7_infectedAll_fwd_peak_1504	INIP	8.28	4.63832	2.0394	exon	B.1.1.7
peaks_nodup_uniq_B.1.1.7_infectedAll_fwd_peak_1508	LPAR1	6.12	5.93127	4.19231	exon	B.1.1.7
peaks_nodup_uniq_B.1.1.7_infectedAll_fwd_peak_1516	ZNF462	7.2	6.8309	5.50858	exon	B.1.1.7
peaks_nodup_uniq_B.1.1.7_infectedAll_fwd_peak_1520	LOC103219844	3.24	4.04289	2.58003	intron	B.1.1.7
peaks_nodup_uniq_B.1.1.7_infectedAll_fwd_peak_1532b	SHB	15.11	4.47608	3.47764	exon	B.1.1.7
peaks_nodup_uniq_B.1.1.7_infectedAll_fwd_peak_1533	SHB	13.31	4.77153	3.30073	intron	B.1.1.7
peaks_nodup_uniq_B.1.1.7_infectedAll_fwd_peak_1536	POLR1E	14.39	5.13139	4.02919	tts	B.1.1.7
peaks_nodup_uniq_B.1.1.7_infectedAll_fwd_peak_1545	TLN1	4.32	4.50699	1.99024	tts	B.1.1.7
peaks_nodup_uniq_B.1.1.7_infectedAll_fwd_peak_1555	NOL6	12.59	5.66454	4.05918	exon	B.1.1.7
peaks_nodup_uniq_B.1.1.7_infectedAll_fwd_peak_1563	TOPORS	13.31	3.57865	1.67778	exon	B.1.1.7
peaks_nodup_uniq_B.1.1.7_infectedAll_fwd_peak_1564	TOPORS	24.47	3.35133	3.22601	exon	B.1.1.7
peaks_nodup_uniq_B.1.1.7_infectedAll_fwd_peak_1567b	ACO1	5.4	5.07763	2.49704	intron	B.1.1.7
peaks_nodup_uniq_B.1.1.7_infectedAll_fwd_peak_1576	LOC103219880	5.76	5.72684	3.17592	intron	B.1.1.7
peaks_nodup_uniq_B.1.1.7_infectedAll_fwd_peak_1581	PLIN2	3.24	4.04289	2.58003	intron	B.1.1.7
peaks_nodup_uniq_B.1.1.7_infectedAll_fwd_peak_1584	BNC2	5.4	6.10227	5.86522	intron	B.1.1.7
peaks_nodup_uniq_B.1.1.7_infectedAll_fwd_peak_1585	LOC103219417	4.68	4.89492	2.19712	exon	B.1.1.7
peaks_nodup_uniq_B.1.1.7_infectedAll_fwd_peak_1588	PSIP1	21.59	7.53041	9.65415	exon	B.1.1.7
peaks_nodup_uniq_B.1.1.7_infectedAll_fwd_peak_1589	SNAPC3	6.84	5.59802	2.58003	intron	B.1.1.7
peaks_nodup_uniq_B.1.1.7_infectedAll_fwd_peak_1596	LOC103219435	15.47	4.11843	2.78861	tts	B.1.1.7
peaks_nodup_uniq_B.1.1.7_infectedAll_fwd_peak_1600	LOC103219448	4.68	5.41581	4.19231	intergenic	B.1.1.7
peaks_nodup_uniq_B.1.1.7_infectedAll_fwd_peak_1601	LOC103219466	26.27	6.81734	10.6815	tts	B.1.1.7
peaks_nodup_uniq_B.1.1.7_infectedAll_fwd_peak_1602	RANBP6	15.11	4.02847	2.78861	exon	B.1.1.7
peaks_nodup_uniq_B.1.1.7_infectedAll_fwd_peak_1603	KIAA2026	11.88	6.43759	4.53418	exon	B.1.1.7
peaks_nodup_uniq_B.1.1.7_infectedAll_fwd_peak_1604	KIAA2026	9.72	6.69754	4.49738	intron	B.1.1.7
peaks_nodup_uniq_B.1.1.7_infectedAll_fwd_peak_1605	KIAA2026	13.31	4.77153	3.30073	exon	B.1.1.7
peaks_nodup_uniq_B.1.1.7_infectedAll_fwd_peak_1610	GLIS3	6.48	6.23114	4.19231	intron	B.1.1.7
peaks_nodup_uniq_B.1.1.7_infectedAll_fwd_peak_1629	ZFAND5	3.6	4.38612	2.58003	intergenic	B.1.1.7
peaks_nodup_uniq_B.1.1.7_infectedAll_fwd_peak_1631	LOC103219581	3.24	4.04289	2.58003	intergenic	B.1.1.7
peaks_nodup_uniq_B.1.1.7_infectedAll_fwd_peak_1634	RORB	9	6.24772	3.5146	intergenic	B.1.1.7
peaks_nodup_uniq_B.1.1.7_infectedAll_fwd_peak_1640	LOC103219605	7.2	6.8309	5.50858	tts	B.1.1.7
peaks_nodup_uniq_B.1.1.7_infectedAll_fwd_peak_1641	LOC103219605	3.24	3.99876	2.33598	tts	B.1.1.7
peaks_nodup_uniq_B.1.1.7_infectedAll_fwd_peak_1648	TLE1	3.6	4.38612	2.58003	promoter-tss	B.1.1.7
peaks_nodup_uniq_B.1.1.7_infectedAll_fwd_peak_1655	NAA35	4.68	5.41581	4.19231	intron	B.1.1.7
peaks_nodup_uniq_B.1.1.7_infectedAll_fwd_peak_1657	C12H9orf153	3.96	4.72935	2.58003	intron	B.1.1.7
peaks_nodup_uniq_B.1.1.7_infectedAll_fwd_peak_1658	CTSL	18.71	4.9281	4.68865	intergenic	B.1.1.7
peaks_nodup_uniq_B.1.1.7_infectedAll_fwd_peak_1660	LOC103219716	6.12	6.78874	7.66185	intron	B.1.1.7
peaks_nodup_uniq_B.1.1.7_infectedAll_fwd_peak_1662	CKS2	7.2	5.12318	2.58003	intergenic	B.1.1.7
peaks_nodup_uniq_B.1.1.7_infectedAll_fwd_peak_1663	LOC103219727	9.72	8.78366	7.93891	tts	B.1.1.7
peaks_nodup_uniq_B.1.1.7_infectedAll_fwd_peak_1664	LOC103219727	3.24	4.04289	2.58003	intergenic	B.1.1.7
peaks_nodup_uniq_B.1.1.7_infectedAll_fwd_peak_1669	LOC103219741	6.48	7.13197	7.66185	intergenic	B.1.1.7
peaks_nodup_uniq_B.1.1.7_infectedAll_fwd_peak_1671	LOC103219745	5.76	5.63139	2.93336	intron	B.1.1.7
peaks_nodup_uniq_B.1.1.7_infectedAll_fwd_peak_1673	LOC103219745	5.04	5.75904	5.86522	intron	B.1.1.7
peaks_nodup_uniq_B.1.1.7_infectedAll_fwd_peak_1674	LOC103219750	7.2	6.8309	5.50858	intergenic	B.1.1.7
peaks_nodup_uniq_B.1.1.7_infectedAll_fwd_peak_1675	LOC103219907	3.6	4.33825	2.33598	tts	B.1.1.7
peaks_nodup_uniq_B.1.1.7_infectedAll_fwd_peak_1677b	LOC103219908	6.84	4.89827	1.68133	intergenic	B.1.1.7
peaks_nodup_uniq_B.1.1.7_infectedAll_fwd_peak_1677c	LOC103219908	5.04	4.31283	1.6213	intergenic	B.1.1.7
peaks_nodup_uniq_B.1.1.7_infectedAll_fwd_peak_1679	IPPK	3.24	3.92471	1.93848	intron	B.1.1.7
peaks_nodup_uniq_B.1.1.7_infectedAll_fwd_peak_1690	LOC103219918	4.32	5.07258	4.19231	intron	B.1.1.7
peaks_nodup_uniq_B.1.1.7_infectedAll_fwd_peak_1693	HABP4	11.16	4.05183	1.98927	intron	B.1.1.7
peaks_nodup_uniq_B.1.1.7_infectedAll_fwd_peak_1695	PTCH1	14.39	3.84854	2.24757	promoter-tss	B.1.1.7
peaks_nodup_uniq_B.1.1.7_infectedAll_fwd_peak_1705	C12H9orf3	6.48	5.34098	2.58003	promoter-tss	B.1.1.7
peaks_nodup_uniq_B.1.1.7_infectedAll_fwd_peak_1709	LOC103239940	3.24	4.04289	2.58003	intron	B.1.1.7
peaks_nodup_uniq_B.1.1.7_infectedAll_fwd_peak_1710	MYO6	10.8	5.36165	3.00263	intron	B.1.1.7
peaks_nodup_uniq_B.1.1.7_infectedAll_fwd_peak_1723a	ZNF292	19.43	5.10803	5.41403	exon	B.1.1.7
peaks_nodup_uniq_B.1.1.7_infectedAll_fwd_peak_1724	ZNF292	8.28	4.50323	1.90012	exon	B.1.1.7
peaks_nodup_uniq_B.1.1.7_infectedAll_fwd_peak_1726	ZNF292	14.03	3.75858	2.24757	exon	B.1.1.7
peaks_nodup_uniq_B.1.1.7_infectedAll_fwd_peak_1727	ZNF292	10.08	3.69197	1.35958	exon	B.1.1.7
peaks_nodup_uniq_B.1.1.7_infectedAll_fwd_peak_1737	LOC103240095	8.28	4.63832	2.0394	intron	B.1.1.7
peaks_nodup_uniq_B.1.1.7_infectedAll_fwd_peak_1739b	LOC103240109	17.63	3.88184	2.8067	exon	B.1.1.7
peaks_nodup_uniq_B.1.1.7_infectedAll_fwd_peak_1739c	LOC103240109	19.43	5.10803	5.41403	exon	B.1.1.7
peaks_nodup_uniq_B.1.1.7_infectedAll_fwd_peak_1742	MANEA	6.84	5.59802	2.58003	exon	B.1.1.7
peaks_nodup_uniq_B.1.1.7_infectedAll_fwd_peak_1744	FUT9	3.6	4.25791	1.93848	exon	B.1.1.7
peaks_nodup_uniq_B.1.1.7_infectedAll_fwd_peak_1747	KATNA1	19.43	3.40535	2.49704	exon	B.1.1.7
peaks_nodup_uniq_B.1.1.7_infectedAll_fwd_peak_1749	ZC3H12D	29.15	3.76852	5.34192	tts	B.1.1.7
peaks_nodup_uniq_B.1.1.7_infectedAll_fwd_peak_1750	LOC103240176	7.2	6.8309	5.50858	intergenic	B.1.1.7
peaks_nodup_uniq_B.1.1.7_infectedAll_fwd_peak_1753	FBXO30	7.56	5.48522	2.73268	exon	B.1.1.7
peaks_nodup_uniq_B.1.1.7_infectedAll_fwd_peak_1760	PLAGL1	14.75	4.63353	3.17097	exon	B.1.1.7
[truncated: 4,852 more rows]

## Sheet: Peaks B.1.351
name_macs2	peakAnn_gene_name	pileup_macs2	fold_enrichment_macs2	-log10(qvalue)_macs2	short_annotation	condition
[truncated: 7,878 more rows]

[truncated: 6 more sheets: Peaks Non-infected HBE day4, Peaks Non-infected HBE day7, Peaks Infected HBE day4, Peaks Infected HBE day7, Peaks Non-infected HNE, Peaks Infected HNE]
